# Supplementary material for: Global age-sex-specific mortality, life expectancy, and population estimates in 204 countries and territories and 811 subnational locations, 1950–2021, and the impact of the COVID-19 pandemic: a comprehensive demographic analysis for the Global Burden of Disease Study 2021
Source: PubMed Central journal article supplement (PMC11126395; doi:10.1016/s0140-6736(24)00476-8), 2024-05-18
Supplement: mmc1.pdf [file mmc1.pdf]

# THE LANCET

## Supplementary appendix 1

This appendix formed part of the original submission and has been peer reviewed. We post it as supplied by the authors.

Supplement to: GBD 2021 Demographics Collaborators. Global age-sex-specific mortality, life expectancy, and population estimates in 204 countries and territories and 811 subnational locations, 1950–2021, and the impact of the COVID-19 pandemic: a comprehensive demographic analysis for the Global Burden of Disease Study 2021. *Lancet* 2024; **403**: 1989–2056.

## **Appendix 1: methods appendix to “Global age-sex-specific mortality, life expectancy, and population estimates in 204 countries and territories and 811 subnational locations, 1950–2021, and the impact of the COVID-19 pandemic: a comprehensive demographic analysis for the Global Burden of Disease Study 2021”**

This appendix provides further methodological detail for “Global age-sex-specific mortality, life expectancy, and population estimates in 204 countries and territories and 811 subnational locations, 1950–2021, and the impact of the COVID-19 pandemic: a comprehensive demographic analysis for the Global Burden of Disease Study 2021 .”

## Preamble

This appendix provides further methodological detail for “Global age-sex-specific mortality, life expectancy, and population estimates in 204 countries and territories and 811 subnational locations, 1950–2021, and the impact of the COVID-19 pandemic: a comprehensive demographic analysis for the Global Burden of Disease Study 2021.” This study complies with the Guidelines for Accurate and Transparent Health Estimates Reporting (GATHER) recommendations.<sup>1</sup> It includes detailed tables and information on data in an effort to maximise transparency in our estimation processes and provide a comprehensive description of analytical steps. We intend this appendix to be a living document, to be updated with each iteration of the Global Burden of Disease Study.

Portions of this appendix have been reproduced or adapted from appendices for Wang et al 2010,<sup>2</sup> GBD 2016 Mortality Collaborators,<sup>3</sup> GBD 2017 Mortality Collaborators,<sup>4</sup> GBD 2017 Population and Fertility Collaborators,<sup>5</sup> GBD 2017 DALYs and HALE Collaborators,<sup>6</sup> and 2019 Demographics Collaborators.<sup>7</sup> References are provided for reproduced sections.

## Table of Contents

|                                                                                                              |    |
|--------------------------------------------------------------------------------------------------------------|----|
| Preamble.....                                                                                                | 2  |
| List of appendix figures and tables.....                                                                     | 6  |
| Appendix figures: .....                                                                                      | 6  |
| Appendix tables: .....                                                                                       | 6  |
| Section 1: GBD overview.....                                                                                 | 7  |
| Section 1.1: Global Burden of Diseases, Injuries, and Risk Factors Study 2021 .....                          | 7  |
| Section 1.2: Harmonising estimation of mortality, population, and fertility.....                             | 7  |
| Section 1.3: Geographical locations of the analysis.....                                                     | 7  |
| Section 1.4: Time period of the analysis .....                                                               | 7  |
| Section 1.5: Statement of GATHER compliance.....                                                             | 7  |
| Section 1.6: List of abbreviations.....                                                                      | 7  |
| Section 1.7: GBD results overview.....                                                                       | 10 |
| Section 1.8: Data input sources overview.....                                                                | 10 |
| Section 1.9: Funding sources.....                                                                            | 11 |
| Section 2: All-cause mortality, HIV mortality, and fatal discontinuities.....                                | 11 |
| Section 2.1: Overview.....                                                                                   | 11 |
| Section 2.2: Child mortality.....                                                                            | 11 |
| Section 2.2.1: Data sources .....                                                                            | 11 |
| Section 2.2.2: VR prioritisation.....                                                                        | 12 |
| Section 2.2.3: VR under-enumeration for bias correction.....                                                 | 13 |
| Section 2.2.4: Computation of $5q_0$ from CBH .....                                                          | 13 |
| Section 2.2.5: SBH method.....                                                                               | 13 |
| Section 2.2.6: $5q_0$ data synthesis .....                                                                   | 13 |
| Section 2.2.7: Identify and remove outliers.....                                                             | 18 |
| Section 2.2.8: Rake subnational estimates to national level (excluding South Africa) .....                   | 18 |
| Section 2.2.9: Review estimates for quality .....                                                            | 19 |
| Section 2.2.10: Under-5 age and sex pattern model estimation .....                                           | 19 |
| Section 2.2.11: Identify and remove outliers from age and sex models.....                                    | 21 |
| Section 2.2.12: Under-5 death number estimation.....                                                         | 21 |
| Section 2.3: Estimation of adult mortality rate .....                                                        | 22 |
| Section 2.3.1: Data sources .....                                                                            | 22 |
| Section 2.3.2: Completeness assessment: death distribution methods and completeness estimates synthesis..... | 22 |
| Section 2.3.3: Sibling survival method .....                                                                 | 24 |
| Section 2.3.4: $45q_{15}$ data synthesis using non-linear mixed effects model and ST-GPR.....                | 27 |
| Section 2.3.5: Identify and remove outliers.....                                                             | 31 |
| Section 2.3.6: Scale subnational estimates to national level (excluding South Africa).....                   | 32 |
| Section 2.4: Model life table system .....                                                                   | 32 |
| Section 2.4.1: Overview.....                                                                                 | 32 |
| Section 2.4.2: Building an empirical model life table database: data sources and quality review .....        | 33 |
| Section 2.4.3: Extending age-specific mortality .....                                                        | 34 |
| Section 2.4.4: GBD relational model life table system with a flexible standard selection mechanism .....     | 34 |
| Section 2.4.5: Rake subnational life tables to national level (excluding South Africa).....                  | 38 |

|                                                                                                             |    |
|-------------------------------------------------------------------------------------------------------------|----|
| Section 2.5: HIV/AIDS estimation.....                                                                       | 38 |
| Section 2.5.1: Age-specific mortality (with and without HIV).....                                           | 38 |
| Section 2.5.2: HIV-free survival rates (for Spectrum) .....                                                 | 38 |
| Section 2.5.3: EPP and Spectrum .....                                                                       | 38 |
| Section 2.5.4: HIV mortality reckoning.....                                                                 | 39 |
| Section 2.5.5: Envelope calculation.....                                                                    | 40 |
| Section 2.5.6: Life table calculation.....                                                                  | 40 |
| Section 2.6: Age-specific mortality estimation for all GBD age groups: with and without HIV .....           | 40 |
| Section 2.6.1: HIV-deleted age-specific mortality.....                                                      | 40 |
| Section 2.6.2: Age-specific mortality without discontinuities (with HIV/AIDS) .....                         | 40 |
| Section 2.6.3: Add fatal discontinuities.....                                                               | 41 |
| Section 2.6.4: Ages-specific deaths with discontinuities and HIV/AIDS.....                                  | 41 |
| Section 2.6.5: Life tables with HIV/AIDS and fatal discontinuities .....                                    | 41 |
| Section 2.7: Fatal discontinuities .....                                                                    | 42 |
| Section 2.7.1: Input data.....                                                                              | 42 |
| Section 2.7.2: Location mapping.....                                                                        | 44 |
| Section 2.7.3: Side splitting.....                                                                          | 45 |
| Section 2.7.4: Prioritisation .....                                                                         | 45 |
| Section 2.7.5: Age-sex splitting.....                                                                       | 45 |
| Section 2.7.6: Assigning uncertainty and generating draws .....                                             | 45 |
| Section 2.7.7: Changes since GBD 2019.....                                                                  | 45 |
| Section 2.8: Accounting for the COVID-19 pandemic.....                                                      | 46 |
| Section 2.8.1: Excess mortality due to the COVID-19 pandemic.....                                           | 46 |
| Section 2.8.2: Excess mortality age-sex splitting.....                                                      | 47 |
| Section 2.8.3: Balancing equation.....                                                                      | 48 |
| Section 2.8.4: COVID-19 excess mortality harmonisation.....                                                 | 48 |
| Section 3: Fertility.....                                                                                   | 48 |
| Section 3.1: Overview.....                                                                                  | 48 |
| Section 3.2.1: Fertility data source types.....                                                             | 48 |
| Section 3.2.2: Fertility data identification and synthesis .....                                            | 48 |
| Section 3.3.2: Age-specific fertility rate estimation for 15 to 49 years .....                              | 49 |
| Section 3.3.3: Data source adjustment .....                                                                 | 51 |
| Section 3.3.4: Hyperparameter selection.....                                                                | 51 |
| Section 3.3.5: SBH methods.....                                                                             | 53 |
| Section 3.3.6: Age-specific fertility rate estimation for 10- to 14-year-olds and 50- to 54-year-olds ..... | 53 |
| Section 3.3.7: Fertility metrics.....                                                                       | 54 |
| Section 3.4: Sex ratio at birth.....                                                                        | 54 |
| Section 3.4.1: Overview .....                                                                               | 54 |
| Section 3.4.2: Modelling approach .....                                                                     | 54 |
| Section 4: Population .....                                                                                 | 54 |
| Section 4.1: Overview.....                                                                                  | 54 |
| Section 4.2: Data sources and processing.....                                                               | 55 |
| Section 4.2.1: Census and registry lists.....                                                               | 55 |
| Section 4.2.2: Data extraction.....                                                                         | 55 |
| Section 4.2.3: Data processing.....                                                                         | 55 |
| Section 4.3: Model inputs.....                                                                              | 58 |
| Section 4.3.1: Migration.....                                                                               | 58 |
| Section 4.3.2: Mortality.....                                                                               | 59 |

|                                                                                                                                                                                              |     |
|----------------------------------------------------------------------------------------------------------------------------------------------------------------------------------------------|-----|
| Section 4.3.3: Fertility.....                                                                                                                                                                | 59  |
| Section 4.3.4: Sex ratio at birth .....                                                                                                                                                      | 59  |
| Section 4.4: Modelling strategy .....                                                                                                                                                        | 59  |
| Section 4.4.1: CCMPP .....                                                                                                                                                                   | 59  |
| This equation is for ages above 0 years, as it does not include fertility. Fertility rates are used along with populations sizes in childbearing ages to calculate the age 0 population..... | 59  |
| Section 4.4.2: Bayesian demographic balancing model .....                                                                                                                                    | 59  |
| Section 4.4.3: Model description .....                                                                                                                                                       | 60  |
| Section 4.4.4: Population uncertainty .....                                                                                                                                                  | 61  |
| Section 4.4.5: GBD world population age standard.....                                                                                                                                        | 62  |
| Section 5: Socio-demographic Index (SDI) analysis.....                                                                                                                                       | 62  |
| Section 5.1: Overview.....                                                                                                                                                                   | 62  |
| Section 5.2: SDI calculation .....                                                                                                                                                           | 62  |
| Section 6: Additional methods.....                                                                                                                                                           | 63  |
| Section 6.1: Correlation estimation.....                                                                                                                                                     | 63  |
| Section 6.2: Annualised rates of change.....                                                                                                                                                 | 63  |
| Section 6.3: Gross domestic product (GDP) and lag-distributed income .....                                                                                                                   | 64  |
| Section 6.4: Educational attainment covariate.....                                                                                                                                           | 64  |
| Section 7: References .....                                                                                                                                                                  | 66  |
| Section 8: Tables and figures.....                                                                                                                                                           | 71  |
| Section 9: Authors' contributions.....                                                                                                                                                       | 251 |

## List of appendix figures and tables

See section 8 for all appendix figures and tables listed here.

### Appendix figures:

Appendix Figure S1. Analytical flowchart for the estimation of all-cause mortality by age and sex, excess mortality due to COVID-19, and HIV/AIDS incidence, prevalence, and mortality for GBD 2021

Appendix Figure S2. Estimated completeness of death registration 1950–2021

Appendix Figure S3. Analytical flowchart for the GBD 2021 fertility estimation process

Appendix Figure S4. Analytical flowchart for the GBD 2021 population estimation process

Appendix Figure S5. Census and registry availability by location and year

### Appendix tables:

Appendix Table S1. GBD location hierarchy with levels

Appendix Table S2. GATHER checklist

Appendix Table S3. Number of all-cause mortality data sources by type and location, 1950–2021

Appendix Table S4. Number of all-cause mortality data sources by type and year, 1950–2021

Appendix Table S5. Number of 5q0 data sources by type and location, 1950–2021

Appendix Table S6. 5q0 reference sources by source date and location, 1950–2021

Appendix Table S7. New data sources added for GBD 2021 mortality estimation

Appendix Table S8. Number of outliered datapoints for the age/sex model by location, source type, and age group

Appendix Table S9. Distribution of empirical life tables by decade and GBD super-region, 1950–2021

Appendix Table S10. Locations by HIV estimation group

Appendix Table S11. Number of sources used for the analysis of age-specific fertility by location

Appendix Table S12. Number of sources used for the analysis of age-specific fertility by year

Appendix Table S13. List of all confirmed censuses by location and year

Appendix Table S14. GBD world population age standard

Appendix Table S15. Socio-demographic Index values for all estimated GBD 2021 locations, 1950–1974

Appendix Table S16. Socio-demographic Index values for all estimated GBD 2021 locations, 1975–1999

Appendix Table S17. Socio-demographic Index values for all estimated GBD 2021 locations, 2000–2021

## Section 1: GBD overview

### Section 1.1: Global Burden of Diseases, Injuries, and Risk Factors Study 2021

The Global Burden of Diseases, Injuries, and Risk Factors Study (GBD) is a collaborative research effort aimed at estimating worldwide population, fertility, morbidity, and mortality. The GBD collaborator network draws on the expertise of over 11 000 contributors from around the world. For this paper, we estimated mortality and population by age, sex, and location from 1950 to 2021.

### Section 1.2: Harmonising estimation of mortality, population, and fertility

The GBD demographic analytical framework is unique in that mortality and population estimates are generated using a closely interconnected modelling process that also incorporates estimation of fertility metrics. For GBD 2021, we first generated age-specific mortality and fertility estimates separately using the analytical approaches described in the sections that follow. In these steps, population was used as an input for the calculation of age-specific mortality rates and fertility rates from vital and civil registration systems. The outputs from these two processes were used to generate age-sex-specific population estimates by location and year using a Bayesian hierarchical cohort component model for population projection. Once the new population numbers were estimated, they were returned as inputs to the same mortality and fertility estimation models that were run again in a second loop. The population estimation process was then run again using the revised mortality and fertility numbers to produce the final population estimates for GBD 2021. To maintain consistency between mortality, population, and fertility in count space, we updated death numbers and birth numbers estimates using the rates estimated in the second loop and the final population estimates.

### Section 1.3: Geographical locations of the analysis

We produced estimates for 204 countries and territories that were grouped into 21 regions and seven super-regions. The seven super-regions are central Europe, eastern Europe, and central Asia; high income; Latin America and the Caribbean; north Africa and the Middle East; south Asia; southeast Asia, east Asia, and Oceania; and sub-Saharan Africa. In GBD 2021 we continue to analyse at subnational levels countries that were added in previous cycles including Brazil, China, Ethiopia, India, Indonesia, Iran, Italy, Japan, Kenya, Mexico, New Zealand, Nigeria, Norway, Pakistan, Russia, the Philippines, Poland, South Africa, Sweden, the UK, and the USA. All analyses are at the first level of administrative organisation within each country except for New Zealand (by Māori ethnicity), Sweden (by Stockholm and non-Stockholm), the UK (by local government authorities), and the Philippines (by provinces). To meet data use requirements, in this publication we present subnational estimates for Brazil, Ethiopia, Indonesia, Iran, Japan, Kenya, Mexico, Norway, Pakistan, South Africa, Sweden, the UK, and the USA; given space constraints, these results are presented in Appendix 2 tables instead of the main text. Additionally, subnational estimates for China, India, Italy, Nigeria, the Philippines, and Russia are included in maps but are not reported in appendix tables. Subnational estimates for other countries will be released in separate publications. A list of locations can be found in appendix table S1 (section 8).

### Section 1.4: Time period of the analysis

We estimated numbers and rates of all-cause mortality and population for the years 1950–2021.

### Section 1.5: Statement of GATHER compliance

This study complies with the Guidelines for Accurate and Transparent Health Estimates Reporting (GATHER) recommendations.<sup>1</sup> We have documented the steps involved in our analytical procedures and detailed the data sources used. See appendix table S2 (section 8) for the GATHER checklist.

The GATHER recommendations can be found here: <http://gather-statement.org/>

### Section 1.6: List of abbreviations

| Abbreviation      | Full phrase                                            |
|-------------------|--------------------------------------------------------|
| 1q0               | probability of death from birth to age 1 year          |
| 45m <sub>15</sub> | mortality rate between age 15 years and 60 years       |
| 45q <sub>15</sub> | probability of death between age 15 years and 60 years |
| 4q <sub>1</sub>   | probability of death between age 1 year and 5 years    |
| 5m <sub>0</sub>   | mortality rate between birth and age 5 years           |



|               |                                                                                                          |
|---------------|----------------------------------------------------------------------------------------------------------|
| sqo           | probability of death between birth and age 5 years, also commonly known as under-5 mortality rate (U5MR) |
| ACLED         | Armed Conflict Location and Event Database                                                               |
| ART           | antiretroviral therapy                                                                                   |
| ASFR          | age-specific fertility rate                                                                              |
| BCCMP         | Bayesian hierarchical cohort component model for population projection                                   |
| BMA           | Bayesian model averaging                                                                                 |
| BTL           | International Classification of Diseases Basic Tabulation List                                           |
| CBH           | complete birth history                                                                                   |
| CCMPP         | cohort component method for population projection                                                        |
| CD4           | CD4+ T lymphocyte; an indicator of immune function                                                       |
| CEB           | children ever born                                                                                       |
| CIBA          | cohort incidence bias adjustment                                                                         |
| CIBA-SPECTRUM | cohort incidence bias adjusted spectrum output                                                           |
| CoD           | causes of death                                                                                          |
| CODEm         | Cause of Death Ensemble model                                                                            |
| COVID-19      | coronavirus disease 2019                                                                                 |
| DALYs         | disability-adjusted life-years                                                                           |
| DDM           | death distribution methods                                                                               |
| DHS           | Demographic and Health Surveys                                                                           |
| DSP           | Disease Surveillance Points System                                                                       |
| DYB           | Demographic Yearbook                                                                                     |
| EDU15+        | Mean years of education for those aged 15 and older                                                      |
| EM-DAT        | Centre for Research on the Epidemiology of Disasters' International Disaster Database                    |
| enn           | early neonatal                                                                                           |
| EPP           | Estimation and Projection Package                                                                        |
| GATHER        | Guidelines for Accurate and Transparent Health Estimates Reporting                                       |
| GBD           | Global Burden of Diseases, Injuries, and Risk Factors Study                                              |
| GEMS          | Global Enteric Multicenter Study                                                                         |
| GGB           | generalised growth balance method                                                                        |
| GGBSEG        | combined generalised growth balance and synthetic extinct generation method                              |

|                 |                                                     |
|-----------------|-----------------------------------------------------|
| GHDx            | Global Health Data Exchange                         |
| GIDEON          | Global Infectious Diseases and Epidemiology Network |
| GK              | Gakidou-King                                        |
| GLMM            | Gulf Labour Markets, Migration, and Population      |
| GPR             | Gaussian process regression                         |
| HDI             | human development index                             |
| HFC             | Human Fertility Collection                          |
| HIV             | human immunodeficiency virus                        |
| HIV CDR         | crude death rate due to HIV/AIDS                    |
| HMD             | Human Mortality Database                            |
| IBC             | Iraq Body Count                                     |
| ICD             | International Classification of Disease             |
| IPUMS           | Integrated Public Use Microdata Series              |
| LDI             | lag-distributed income per capita                   |
| l <sub>nn</sub> | late neonatal                                       |
| LSMS            | Living Standards and Measurement Surveys            |
| MAD             | median absolute deviation                           |
| MCCD            | Medical Certification of Causes of Death            |
| MCMC            | Markov Chain Monte Carlo                            |
| MICS            | Multiple Indicator Cluster Surveys                  |
| MPIDR           | Max Planck Institute for Demographic Research       |
| ${}_n m_x$      | mortality rate between age x and x+n                |
| NCD             | non-communicable disease                            |
| OPRM            | other pandemic-related mortality                    |
| PCVA            | Physician Certified Verbal Autopsy                  |
| PES             | post-enumeration survey                             |
| p <sub>nn</sub> | post neonatal                                       |
| PRIO            | Peace Research Institute Oslo                       |
| ${}_n q_x$      | probability of death between age x and x+n          |
| RHS             | Reproductive Health Surveys                         |
| SBH             | summary birth history                               |
| SCAD            | Social Conflict Analysis Database                   |

|        |                                                        |
|--------|--------------------------------------------------------|
| SDI    | Socio-demographic Index                                |
| SEER   | Surveillance, Epidemiology, and End Results Program    |
| SEG    | synthetic extinct generation                           |
| SRS    | Sample Registration System                             |
| ST-GPR | spatiotemporal Gaussian process regression             |
| TFO30  | total fertility over age 30                            |
| TFR    | total fertility rate                                   |
| TFU25  | total fertility under age 25                           |
| TMB    | template model builder                                 |
| U5MR   | under-5 mortality rate                                 |
| UCDP   | Uppsala Conflict Data Program                          |
| UI     | uncertainty interval                                   |
| UN     | United Nations                                         |
| UNAIDS | Joint United Nations Programme on HIV/AIDS             |
| UNHCR  | United Nations High Commissioner for Refugees          |
| UNICEF | United Nations International Children’s Emergency Fund |
| UNPD   | United Nations Population Division                     |
| UNSD   | United Nations Statistics Division                     |
| USAID  | United States Agency for International Development     |
| VR     | vital registration                                     |
| WFS    | World Fertility Survey                                 |
| WHO    | World Health Organization                              |
| YLDs   | years lived with disability                            |
| YLLs   | years of life lost                                     |

## Section 1.7: GBD results overview

Supplementary results are available in appendix 2.

Visualisations for all results specific to demographic mortality measures for GBD 2021 are also available at <https://vizhub.healthdata.org/mortality/>.

## Section 1.8: Data input sources overview

GBD 2021 synthesises a large and growing number of data input sources including surveys, censuses, vital statistics, and other health-related data sources. The data from these sources are used to estimate mortality and morbidity; causes of death, illness, and injury; and attributable risk for 204 countries and territories from 1990 to 2021. The input sources are accessible through an interactive citation tool available in the GHDx. While we reviewed and extracted all input sources

included in this tool, some sources were not included in our models as a result of data deduplication in the modelling process.

Citations for specific GBD components, causes and risks, and locations can be found through the GBD Sources Tool in the GHDx: <https://ghdx.healthdata.org/gbd-2021/sources>. This tool allows users to view and access GHDx records for input sources and export a CSV file that includes metadata, citations, and information about where the data were used in GBD. As required by GATHER, additional metadata for input sources are available through the citation tool as well.

## Section 1.9: Funding sources

Research reported in this publication was supported by the Bill & Melinda Gates Foundation, the University of Melbourne, Public Health England, the Norwegian Institute of Public Health, the National Institute on Aging of the National Institutes of Health (award P30AG047845), and the National Institute of Mental Health of the National Institutes of Health (award R01MH110163). The content is solely the responsibility of the authors and does not necessarily represent the official views of the Bill & Melinda Gates Foundation or the National Institutes of Health. The funders of the study had no role in study design, data collection, data analysis, data interpretation, or writing of the report. All authors had full access to all data in the study and had final responsibility for the decision to submit for publication.

## Section 2: All-cause mortality, HIV mortality, and fatal discontinuities

### Section 2.1: Overview<sup>7</sup>

We aimed to generate the most accurate all-cause mortality estimates for all GBD age groups, by sex, for all 1055 locations in the GBD 2021 location hierarchy, for a 72-year time series from 1950 to 2021.

One methodological challenge we faced was variability in the completeness and quality of data. Calculating all-cause mortality for different age groups in different locations required drawing on a diverse set of data sources (appendix tables S3 and S4). More generally, estimating all-cause mortality was complicated by the fact that not all countries and territories have complete vital registration (VR) systems recording the event of death and periodic censuses. Several methods were used to estimate completeness and adjust VR data accordingly.

Here, we provide a detailed description of the methodology we used to estimate all-cause mortality. Due to the interdependence between HIV mortality estimation and all-cause mortality estimation, this appendix includes a partial overview of the epidemiological modelling of HIV. In what follows, we describe five major methodological tasks: estimating the probability of death between birth and age 5 years ( ${}_5q_0$ ); estimating the probability of death between age 15 years and 60 years ( ${}_{45}q_{15}$ ); estimating a complete set of age-specific mortality rates; estimating HIV mortality; and producing final estimates of age-specific mortality with HIV and fatal discontinuities incorporated. We describe primary input data and the analytical steps undertaken for each step. The appendix figure S1 flowchart shows the entire modelling process. We ran the full model twice in order to update the input mortality data with the updated population estimates to improve internal consistency among different model components in not only our mortality estimation model, but also fertility and population estimation models. Inputs that were updated for the second iteration of the model are shown in appendix figure S1 using patterned boxes.

### Section 2.2: Child mortality<sup>7</sup>

#### Section 2.2.1: Data sources

##### *Overview*

For the estimation of child mortality, we used data from vital registration (VR) systems, Sample Registration Systems (SRS), Disease Surveillance Points Systems (DSP), household surveys (complete birth histories [CBH], summary birth histories [SBH]), censuses (SBHs, CBHs on rare occasions), and Demographic Surveillance Sites (DSS). It was important that data were fully representative of the given age-sex group and location-year.

##### *VR/SRS/DSP from other sources*

We endeavored to incorporate all available data from VR systems as inputs in our all-cause mortality estimation process. This included multi-country VR sources such as the WHO Mortality Database, United Nations Demographic Yearbooks, Human Mortality Database, country statistics offices, and the Organisation for Economic Co-operation and Development (OECD) databases. We updated data from these sources in our systems as new releases occurred. Wherever possible, we

also catalogued all data sources from each system for ongoing national VR systems (eg, the USA National Vital Statistics System).

When VR data were not available, we extracted data from the SRS from India and the DSP from China. Data from the Health and Demographic Surveillance System were also used.

#### *Under-5 populations and livebirths*

Livebirths and population in the under-5 age groups were produced as part of the fertility and population estimation process, described in sections 3 and 4.

#### *CBH microdata*

Where VR data were unavailable or unreliable, CBHs were the preferred method for data collection on child mortality. CBHs are surveys conducted with mothers about all livebirths they have ever had by the time of the survey regardless of the child's survival status, including birthdate, survival status, and date of death, if deceased. Since CBH data include the age at which mothers gave birth to each child, we could calculate period and age-specific mortality rates in the time period before the survey, assuming no survivor, migration-related, or recall bias. Many routine survey series, including the Demographic and Health Surveys (DHS), World Fertility Surveys (WFS), Multiple Indicator Cluster Surveys (MICS), and other national surveys, contain CBH modules. When available, we downloaded and used microdata that included individual level survey responses as opposed to the tabulated results which generally report values for three five-year periods.

#### *CBH tabulated data*

Some surveys release tabulated results before microdata, so we included these tabulated datapoints in our probability of death from birth to age 5 years ( ${}_5q_0$ ) database. However, once we were able to obtain microdata from the same survey, the tabulated report estimates were replaced in the database with point estimates from the processed microdata.

#### *SBH microdata*

SBH questionnaires are shorter and less detailed than CBHs and lack information on dates of birth and death of children. They simply ask mothers the number of livebirths they have ever had and how many of those children have died, as well as the age of the mother at the time of the interview. For this study, we collected all available SBH data with microdata or those that reported data on the proportion of a mother's children who died, by maternal age group. GBD has developed its own summary birth history method to generate under-5 mortality rate (U5MR) using the aforementioned SBH data.

#### *Under-5 age-sex patterns for VR/SRS/DSP*

In high-income countries, under-5 mortality estimates were derived primarily with data from VR systems. Often, these data were divided into several age groups: early neonatal (0-6 days), late neonatal (7-27 days), post-neonatal (28-364 days), and 1 to 4 years. Some country-years of data had less specific age groups, with the early and late neonatal age groups combined or the under-1 age groups combined. Age-sex patterns of mortality in the under-5 age groups were also available from SRS and DSP sources.

#### *Under-5 age-sex patterns from CBH*

Aside from VR/SRS/DSP, CBHs from surveys provide another important source on the distribution of mortality among under-5 age groups. These data reflect age patterns primarily from low-income countries and countries with higher levels of under-5 mortality. We only used datapoints from the 15 years leading up to the survey, so children who were born to mothers more than 15 years before the interview were not included in our analysis. We grouped observations into 5-year time periods to produce more robust input point estimates of the probability of death for each under-5 age-sex group.

### **Section 2.2.2: VR prioritisation**

As we worked with a variety of sources of VR data, we developed a hierarchy of preferred sources. For a given location-year, our first preference was to use WHO data from GBD cause-specific mortality estimation, followed by unadjusted WHO data, then Human Mortality Database (HMD) data, and lastly UN Demographic Yearbook data. We made exceptions in some cases, however. We assessed single-country VR data sources according to whether there were inconsistencies with other data sources or VR system documentation. For instance, we used HMD VR data for Germany, Taiwan (Province of China), and Spain to estimate certain years since WHO data produced mortality rates inconsistent with established trends.

### Section 2.2.3: VR under-enumeration for bias correction

For under-5 mortality, VR system completeness was estimated in the same way as in previous iterations of GBD, and as was the case in GBD 2019, most VR bias was corrected using a mixed effects non-linear model, described in section 2.2.6.

### Section 2.2.4: Computation of 5q0 from CBH

We used CBH microdata from unpooled surveys to calculate biennial U5MRs. We analysed each survey separately (eg, Kenya DHS 2014; Bangladesh MICS 2012–2013) instead of pooling all DHS or MICS CBH surveys from a single country (eg, Nigeria MICS surveys from 2007, 2011, and 2016–2017) so that we could better understand and address data quality issues in specific surveys. By grouping observation points into two-year intervals to generate biennial estimates, we overcame the issues of smaller sample sizes and lower stability typically associated with the use of unpooled data. We only included biennial estimates that contained more than 10 000 person-months of data.

#### *Processing of tabular CBH*

In some instances, microdata were not available for all CBH surveys. We still added results from these surveys to our database if survey reports provided  ${}_5q_0$  datapoint estimates based on CBH.

### Section 2.2.5: SBH method

We used an SBH method developed and updated by Rajaratnam and colleagues to estimate  ${}_5q_0$  from SBH data from censuses and surveys.<sup>9</sup> We found this method to be more accurate and provide more timely estimates than previous methods.

In cases where the only data available were tabular data of the number of livebirths ever born and number of children who died, aggregated by the mother's age, we applied Rajaratnam and colleagues' Maternal Age Cohort model.<sup>9</sup>

### Section 2.2.6: ${}_5q_0$ data synthesis

#### *Data synthesis using ST-GPR*

We used a spatiotemporal Gaussian process regression (ST-GPR) to estimate U5MR.<sup>7</sup> We also incorporated data bias adjustment into the model based on the under-5 mortality synthesis model used in previous GBD iterations.<sup>2,3,10–12</sup> To adjust for bias, we ran the first-stage non-linear effects model for GBD 2021 standard locations only and then extracted predicted fixed effect coefficients from the non-linear mixed effect model and applied them to all locations. A set of fixed effects were estimated for each data source type used in our analysis. A list of source types can be found below. We also estimated a random effect for each data source within a given location. The combination of source-type-specific fixed effect and source-specific random effect was the basis for bias adjustment. When a reference source was selected, all other sources were adjusted based on the difference between the bias value from the reference source and the source of interest. We did not adjust reference sources when more than one source was used as the reference source. In this case, all other sources were adjusted based on the average bias values of all selected reference sources. Removing systematic differences in sources meant that we avoided estimating false trends caused by overlapping sources with different levels of non-sampling variance. We then synthesised the bias-adjusted child mortality data using a combination of a non-linear effects model, spatiotemporal regression, and Gaussian process regression (GPR). This process produced consistent time series estimates of mortality by location, with 95% uncertainty intervals (UIs) using the 2.5% and 97.5% percentiles of the summed draws.

#### *Source types used in child mortality bias correction*

1. CBH: AIDS Indicator Survey and Malaria Indicator Survey
2. CBH: Census
3. CBH: Demographic and Health Survey
4. CBH: Multiple Indicator Cluster Survey
5. CBH: World Fertility Survey
6. CBH: Other survey series
7. Household Death Recall: Census
8. Household Death Recall: Other survey series
9. Household Death Recall: Incomplete VR/Sample Registration/Surveillance

10. SBH: AIDS Indicator Survey and Malaria Indicator Survey
11. SBH: Census
12. SBH: Demographic and Health Survey
13. SBH: Multiple Indicator Cluster Survey
14. SBH: World Fertility Survey
15. SBH: Other survey series
16. VR/Sample Registration/Surveillance: complete
17. VR/Sample Registration/Surveillance: incomplete

A list of under-5 mortality sources is provided in appendix table S5 and a list of reference sources is in appendix table S6.

### *Non-linear mixed effects model*

To estimate data bias and provide first stage predictions for  ${}_5m_0$ , we used a non-linear mixed effects regression model:

$${}_5m_{0ctsi} = \exp[\alpha_k + \gamma_{0c} + \gamma_{0cs} + (\beta_1 + \gamma_{1c}) * \log(LDI_{ct}) + (\beta_2 + \gamma_{2c}) * education_{ct}] + \beta_3 * HIV_{ct} + \varepsilon_{ctsi}$$

$$\gamma_{0c} \sim N(0, \sigma_{\gamma_0}^2)$$

$$\gamma_{1c} \sim N(0, \sigma_{\gamma_1}^2)$$

$$\gamma_{2c} \sim N(0, \sigma_{\gamma_2}^2)$$

$$\gamma_{0cs} \sim N(0, \sigma_{\gamma_{0s}}^2)$$

$$\varepsilon_{ctsi} \sim N(0, \sigma_{\varepsilon}^2)$$

Where

Index  $c$  is location,  $t$  is time,  $s$  is source,  $k$  is source type of datapoint  $i$

${}_5m_0$  is U5MR

$LDI$  is lag-distributed income per capita

$education$  is mean years of education for women of reproductive age (15-49 years)

$HIV$  is crude death rate due to HIV in age groups 0-4

$\gamma_{0c}$  is a country random intercept

$\gamma_{0cs}$  is a country-source random intercept

$\gamma_{1c}$  is a country random slope for  $LDI$

$\gamma_{2c}$  is a country random slope for  $education$

$\alpha$  is a fixed intercept for source

$\beta_i$  is a fixed covariate coefficient

$\varepsilon$  is the residual

$\gamma_{0c}, \gamma_{0cs}, \gamma_{1c}, \gamma_{2c}$  are all pairwise independent

Each source was categorised into one of the 17 source types ( $k$ ) listed above. See sections 6.3 and 6.4 for details on how  $LDI$  and  $education$  were estimated. This regression used  $HIV$  mortality rates estimated as part of the GBD 2021 cycle (section 2.5).

We turned to country experts to identify data sources in each location that were likely to be least biased and of higher data quality to be used as the reference source or sources. When it was believed that a VR system was complete, we used it as the reference source. When data from complete VR systems were not available, we used DHS estimates from CBHs as the

reference source if available. Specific sources were selected on a location-by-location basis when neither complete VR nor CBH from DHS or other surveys were available.

The bias adjustment was applied using the equation below:

$$adjusted_5m_{0,cts} = \exp[\alpha_t + \gamma_{0c} + \gamma_{0ref,c+} (\beta_1 + \gamma_{1c}) * \log(LDI_{ct}) + (\beta_2 + \gamma_{2c}) * education_{cy}] + \beta_3 * HIV_{ct} + \epsilon_{cts}$$

For incomplete VR data, we calculated an upward adjustment using a five-year rolling mean of the difference between incomplete VR data and a Loess regression of the already-adjusted survey data.

### *Spatiotemporal smoothing*

To smooth the residuals between the predicted  ${}_5q_0$  time series using the non-linear mixed effect model and the adjusted raw data, we applied a combination of spatiotemporal smoothing functions. The stage described here smoothed the residuals over time and across locations within each GBD region. The first-stage prediction of  ${}_5q_0$  was generated using the equation below:

$$predicted_5m_{0,ct} = \exp[\alpha_t + \beta_1 * \log(LDI_{ct}) + \beta_2 * education_{ct}] + \beta_3 * HIV_{ct}$$

The predicted time series for this smoothing function only used the fixed effects from the non-linear mixed effects model; no random effects or survey-type fixed effects were included.

After calculating the predicted time series, we calculated the residuals between the predicted and the adjusted data. Next, we applied the smoothing functions to the residuals. We weighted residuals in each region for each location-year based on how close the data were to this location-year in space and time. 99% of the weight went to in-location residuals, with the remaining 1% going to out-of-location but within-GBD region residuals. The weight for time was defined using the equation below:

$$w_t = \left(1 - \left(\frac{|r_t - r_{est}|}{1 + \operatorname{argmax}_t |r_t - r_{est}|}\right)^\lambda\right)^3$$

Where

$r_t$  is the year of interest

$r_{est}$  is the year of the residual being weighted

$\operatorname{argmax}_t |r_t - r_{est}|$  is the maximum distance between the year of interest and a residual within the region

$\lambda$  is the weighting function that dictates how quickly the weights fall off as the distance in time increases

A larger  $\lambda$  implies that the assigned weights will diminish more slowly over time, while a smaller  $\lambda$  allows the weights to diminish more rapidly with time.  $\lambda$  values were chosen using the parameter selection process described below. We generated one estimate of the smoothed residuals using a linear fit to this weighted data, similar to a Loess fit, and then generated a second estimate of the smoothed residuals by calculating the weighted average of the data. We then combined these two estimates of the smoothed residuals into one final estimate. We assigned more weight to the local linear fit in countries and territories with high data density and quality. Alternatively, we assigned more weight to the weighted average in countries and territories with data sparsity using the following equation:

$$final\ smoothed\ residual = k * linear\ estimate + (1 - k) * weighted\ average$$

Where

$$k = \frac{\text{number of in country datapoints}}{\text{number of in country datapoints} + \text{number of country years with no data}}$$



The pooling of two estimates of the smoothed residuals was employed to account for artificial trends in smoothed residuals from either method, especially when the year of interest was further away from the last year with empirical data. This approach also helps improve comparability among estimates for various locations that otherwise might need to employ different methods for smoothing the residuals.

Last, we incorporated the smoothed residuals back into the above predictions to produce a smoothed approximation of the adjusted data. We used this estimate as the prior for the Gaussian process regression (GPR) described in the following section.

To avoid producing space-time smoothed U5MR values less than 0 or greater than 1, both space-time smoothing and the GPR described below were done using U5MR in logit space.

### GPR

We used GPR to generate a final time series of point estimates as well as UIs.

The GPR model was as follows:

$$\mu_{c,t} = f_c(t) + S_{c,t}$$

$$f_c(t) \sim GP(M, C)$$

Where

$t$  is time,  $c$  is location

$\mu_t$  is the true  $\log_{10}(sq_0)$

$f(t)$  is the baseline mortality risk

$S_t$  is excess mortality due to fatal discontinuities estimated independently of  $f(t)$

$M$  is the mean function for the Gaussian process

$C$  is the covariance function for the Gaussian process

The mean function ( $M$ ) is an initial guess at our unknown function  $f_c$ . We chose this to be our second-stage prediction.

The covariance function ( $C$ ) defines the covariance between any two points  $t_i$  and  $t_j$ . It controls the smoothness of realizations from the Gaussian process and the amount of deviation from the mean that is tolerated. There are some conventions regarding good choices for the covariance function in GPR, but no single function is indicated. We elected to use the Matérn covariance function:

$$C_{matern}(x_i, x_j | a, s, \nu) = a^2 \frac{1}{\Gamma(\nu)2^{(\nu-1)}} \left[ \sqrt{2\nu} \frac{|x_i - x_j|}{s} \right]^\nu K_\nu \left( \sqrt{2\nu} \frac{|x_i - x_j|}{s} \right)$$

Where

$a$  is amplitude

$s$  is scale

$\nu$  is degree of differentiability

$\Gamma$  is the gamma function

$K_\nu$  is the modified Bessel function of the second kind and order  $\nu$

To select the *amplitude* parameter, we first calculated the variance of logit-difference between the first-stage and second-stage predictions in high data-density years separately by location. Then, this location-specific variance was used as amplitude for countries with complete VR and the mean of these variances was used as amplitude for countries with incomplete VR. *Scale* was fixed by location based on data density (see table below), and degree of differentiability is fixed at 1.

In addition to our Gaussian process prior for  $f$ , we observe the value of  $f$  for some set of years  $o_i$  – these are our data. We assume the observation error is normally distributed and calculate the data variance as described in the next section. Then, the posterior distribution for  $f$  given the observations and the prior is another Gaussian process with a closed form solution for posterior  $\tilde{M}$  and  $\tilde{C}$ . Let  $V$  be a matrix with observation variances  $[v_0, \dots, v_{n-1}]$  on its diagonal and  $o$  be the vector of years for which we have observed  $f(o)$ . Then, the posterior distribution,  $\tilde{f}$ , is:

$$\tilde{f}_c | data \sim GP(\tilde{M}, \tilde{C})$$

$$\begin{aligned}\tilde{M}(t) &= M(t) + C(t, o)[C(o, o) + V]^{-1}(f(o) - M(o)) \\ \tilde{C}(t_i, t_j) &= C(t_i, t_j) - C(t_i, o)[C(o, o) + V]^{-1}C(o, t_j)\end{aligned}$$

From this Gaussian process posterior distribution, we take realisations, where one realisation is a complete function from our domain of years to the outcome of interest. 1000 realisations are draws that can be collapsed to get a mean and 95% uncertainty interval for every location and year separately.

GPR was implemented using the PyMC package in Python.

#### *Data variance*

We calculated data variance for each  ${}_{5q_0}$  input datapoint, which reflects sampling errors. Additional non-sampling errors were added when the datapoint was from a non-reference data source. Specifically, we calculated data variance using the following methods, depending on the type of data:

1. **Complete VR data:** We assumed there was only sampling error, and not non-sampling error, because complete VR is assumed to be unbiased. We calculated this error using the binomial distribution  $p(1 - p)/N$ , where  $N$  is the population aged 0 to 5 years for the location and  $p$  is the U5MR,  ${}_{5m_0}$ . We then used the delta method<sup>13</sup> to transform the variance of  ${}_{5m_0}$  to the variance of  $\log_{10}({}_{5q_0})$ .
2. **Incomplete VR data:** We included both sampling error and non-sampling error from uncertainty in our estimate of data completeness. We calculated the total data variance as the sum of the variances from sampling error (see calculation method for complete VR data) and non-sampling error based on the completeness estimate.
3. **CBH data:** We generated 1000 simulations of  ${}_{5q_0}$ , transformed these estimates into  $\log_{10}$  space, and calculated the sampling variance from the transformed draws.
4. **SBH data:** We used the standard error from the mean residuals.
5. **Other:** We used the maximum standard error from non-VR points in a country or territory if we could not produce data variance for a source. When no other source was available, we set the data variance to be the maximum standard error from non-VR data sources within the GBD region the location belongs to.

Finally, for all data types other than complete VR data, we calculated the within-source-type variance of the source-specific random effect for each source type. We then converted it to  $\log_{10}$  space and added it to the variance already calculated using one of the methods above.

### Hyperparameter selection ST-GPR used to generate U5MR

We selected hyperparameters based on a data density score for each location, first used in GBD 2017.<sup>4</sup> We calculated data density scores based on the number of deaths from VR sources plus the number of unique CBH and SBH sources available for the given location, using the following computational methods for each type of data source:

1. **Complete VR data density score:** calculated based on the number of deaths reported from unbiased VR sources in a single location. We capped the number of deaths for each source-year at 500 and then divided that number by 500 to generate a score between 0 and 1 where 1 represents a complete VR system with at least 500 registered deaths and a 0 represents a complete VR system with 0 registered deaths. Final complete VR scores ranged from 0 to 78.
2. **Incomplete VR data density score:** calculated the same way as with complete VR data but using biased VR sources rather than unbiased VR sources.
3. **Total CBH sources:** the number of unique complete birth histories for a single location.
4. **Total SBH sources:** the number of unique summary birth histories for a single location.

After making these calculations, we used the following formula to compute the final data density for each location:

$$data\_density = complete\_vr\_deaths + (0.5 \times incomplete\_vr\_deaths) + (2 \times cbh\_sources) + (0.25 * sbh\_sources)$$

We then assigned hyperparameters based on final data densities, as designated in table A. Zeta determines the magnitude of space weights in the spatiotemporal smoothing, Lambda determines the magnitude of time weights. Scale is the scale parameter of the Matérn covariance function, which controls correlation over time.

Table A

| Data density | Zeta | Lambda | Scale |
|--------------|------|--------|-------|
| 0 to 9       | 0.7  | 0.7    | 15    |
| 10 to 19     | 0.7  | 0.5    | 15    |
| 20 to 29     | 0.8  | 0.4    | 15    |
| 30 to 49     | 0.9  | 0.3    | 10    |
| 50 plus      | 0.99 | 0.2    | 5     |

### Section 2.2.7: Identify and remove outliers

We carefully reviewed child mortality data and estimates to ensure quality. First, we outliered datapoints from years in which fatal discontinuities (shocks) occurred, unless cause of death information was available for the VR datapoint such that deaths from specific causes of death identified as a fatal discontinuity could be removed. We excluded fatal discontinuity data because our objective was to identify the underlying mortality risk, which would be skewed by mortality data from large stochastic events. We incorporated fatal discontinuities back into the data later in the estimation process (see section 2.6.3). Second, we outliered data sources with quality concerns, such as the Afghanistan DHS from 2010. Collaborators from our extensive network reviewed sources in which they had expert knowledge and identified those with known quality issues.

### Section 2.2.8: Rake subnational estimates to national level (excluding South Africa)

One strength of GBD is that we ensure consistency throughout our location hierarchy, meaning that subnational mortality estimates always add up to national mortality estimates. The estimation process for  $s_{q0}$  described above does not enforce this consistency, so the following adjustments in locations with subnational estimates after the aforementioned estimation process were made. We first population-weighted the subnational estimates to form an estimate at the national level. A scalar was then calculated by year by dividing the separately estimated national value by this weighted average of subnational estimates. We then multiplied the scalars from this calculation by all the subnational estimates to get scaled estimates for each subnational location. We chose this strategy for subnational scaling because national-level estimates are generally more reliable as they are more likely to be based on more empirical data, and the data themselves are less likely to be affected by the small number issue. The effect of scaling was minimal in locations where VR data were high-quality.

South Africa was the one country where we did not use this method. We instead aggregated provincial-level estimates from GPR to the national level. This was to ensure consistency between our estimates at the subnational level and the observed deaths from the VR system in South Africa at the national level.

### Section 2.2.9: Review estimates for quality

We compared our  ${}_5q_0$  estimates with UNICEF estimates from the 2022 revision.<sup>14,15</sup> We identified all differences in results and determined whether they were caused by updates to the available data, changes to the hyperparameters we set, or modifications to input covariates. If it was determined that our data or estimates needed to be updated based on this process of reviewing differences with UNICEF, necessary revisions were made. Additionally, we revised data and estimates through expert consultation with the GBD mortality collaborator network.

### Section 2.2.10: Under-5 age and sex pattern model estimation

To disaggregate under-5 mortality into age- and sex-specific groups, we used a multi-stage modelling process similar to the method first published in GBD 2016.<sup>3</sup> The result of this process is sex-specific mortality for the early neonatal (0-6 days), late neonatal (7-27 days), 1-5 months, 6-11 months, 12-23 months, and 2-4 years age groups.

First, we estimated the ratio of male to female  ${}_5q_0$ , and then, we estimated the sex-specific age distributions of under-5 mortality. Estimating both the sex and age components relied on the following sequential processes: (1) generalised linear model, (2) spatiotemporal smoothing, and (3) GPR. Finally, the components were scaled and synthesised into age- and sex-specific mortality rates.

Data from VR, SRS, and CBHs were converted to mortality risks for each age group. Some sources included age-specific data for all four age groups, while others only had infant (early, late, and post-neonatal) and child distinctions.

The sex model first estimated the ratio of male to female  ${}_5q_0$  in rescaled logit space for each location  $o$  in region  $g$  in year  $o$ . We excluded observed ratios below 0.8 or above 1.5 and then rescaled the ratio data from 0.8–1.5 to 0–1 to place our data within the domain of the logit function. Data from non-standard locations were also excluded in the first-stage model fitting. Outliered data by location, source type, and age group is shown in appendix table S8.

With these data, we fit the following sex-ratio model:

$$\text{logit} \left( \frac{\text{Male } {}_5q_0 \text{ scaled}}{\text{Female } {}_5q_0 \text{ scaled}} \right)_{ijt} = \beta_0 + \delta_j + \gamma_i + S_{{}_5q_0} + \varepsilon_{ijt}$$
$$\delta_j \sim N(0, \sigma_{\delta_j}^2)$$
$$\gamma_i \sim N(0, \sigma_{\gamma_i}^2)$$
$$\varepsilon_{ijt} \sim N(0, \sigma_{\varepsilon}^2)$$

Where

$i$  is location,  $j$  is region,

$t$  is time

$\beta_0$  is an intercept term

$S_{{}_5q_0}$  is a natural spline on both-sex  ${}_5q_0$

$\delta_j$  is the region random intercept

$\gamma_i$  is the location random intercept (nested in region)

$\varepsilon$  is the residual

We then used the parameter estimates from this model, and our estimated  ${}_5q_0$ , to predict first-stage sex-ratio of under-5 mortality for all GBD location-years. Spatiotemporal smoothing and GPR were used to produce final sex-ratio estimates. We chose ST-GPR hyperparameters using the same method described in section 2.2.6.

Next, we estimated  ${}_5q_0$  for males and females using the equation:

$${}_5q_0 = \left( \frac{1}{1 + r_{birth}} \right) * (female {}_5q_0) + \left( \frac{r_{birth}}{1 + r_{birth}} \right) * (male {}_5q_0)$$

Where

$r_{birth}$  is the sex-ratio at birth

${}_5q_0$  is the direct output from the estimation process described in section 2.2.1–2.2.10

male  ${}_5q_0$  can be replaced with female  ${}_5q_0$  times the predicted  ${}_5q_0$  sex-ratio to create a system with one unknown.

We then fit a separate age-specific model for each sex-specific age group, resulting in five models for each sex: early neonatal, late neonatal, post-neonatal, infant (neonatal, late neonatal, and post-neonatal combined), and child. The outcome modelled was the log-proportion of sex-specific under-5 deaths occurring in age group  $x$ , or in other words, the probability of death in age group  $x$  conditional on death before age 5. This outcome facilitates scaling to our estimates for  ${}_5q_0$ .

The first-stage model for estimating this age distribution was:

$$\log (Pr(\text{death at age } x | u5 \text{ death})_{jits}) = \beta_0 + \gamma_{js} + \gamma_{is} + a_{1x}\beta_{1s} * HIV_{its} + a_{2x}\beta_{2s} * Mat. Ed._{it} +$$

$$a_{3x}\beta_{3s} * Completeness_{it} + S_{{}_5q_0} + \varepsilon_{jits}$$

$$\gamma_{js} \sim N(0, \sigma^2)$$

$$\gamma_{is} \sim N(0, \tau^2)$$

Where

$x$  is age,  $s$  is sex,  $i$  is location,  $j$  is region,  $t$  is time

$\gamma_i$  is a country random intercept (nested in region)

$\gamma_{j[i]}$  is a region random intercept

$S_{{}_5q_0}$  is a natural spline on  ${}_5q_0$

$\beta_i$  is a fixed covariate coefficient

$a_{1x}$  is an indicator for HIV covariate inclusion: 0 for enn, 1 otherwise

$a_{2x}$  is an indicator for maternal education covariate inclusion: 1 for child, 0 otherwise

$a_{3x}$  is an indicator for source completeness covariate inclusion: 1 for child, 0 otherwise

$\varepsilon$  is the residual

The literature on HIV mortality in different under-5 age groups is limited, and there is no clear guidance on how to age-split under-1 deaths due to HIV.<sup>16,17</sup> Prior research has, however, suggested that HIV mortality risk differs between different under-5 age groups,<sup>17,18</sup> with essentially all HIV deaths that occur in the first year of life occurring in the post-neonatal stage. We therefore included under-5 crude death rates from HIV from GBD 2021 (see section 2.2.6) in the model for post-neonatal, infant, and child, but not the neonatal age groups. Including this covariate improved the fit and predictive validity of the model in countries with high HIV prevalence. In locations where HIV/AIDS contributes a large burden to under-5 mortality, using  ${}_5q_0$  as the only predictor in this model typically leads to an overestimation of neonatal mortality.<sup>19</sup>

We also included a maternal education covariate and a source-specific child completeness covariate for the 1 to 4 age group only. We calculated child completeness by dividing the source-specific  ${}_5q_0$  point estimate by the final GPR  ${}_5q_0$  estimate. In the prediction of this model, we used a completeness value of 1, to predict from a hypothetically complete source.

After prediction of the first-stage model for all GBD location-years, ST-GPR was used to generate stage-three results by age and sex. We used the same ST-GPR process as described previously for the overall U5MR.

Finally, we ensured consistency in probability of death between the separate and collective under-5 age groups by scaling. We first scaled the infant and child conditional probabilities to sum to 1 and then scaled the early neonatal, late neonatal, and post-neonatal conditional probabilities to sum to the infant conditional probability. Next, we calculated the probability of early neonatal death by multiplying the rescaled conditional probability of early neonatal death given under-5 death by  ${}_5q_0$  using the equation below:

$$q_{enn} = \Pr(\text{death in } enn \mid u5 \text{ death}) * 5q_0$$

where *enn* is early neonatal.

To calculate the probability of late neonatal death, we multiplied the rescaled conditional probability of late neonatal death given under-5 death by  ${}_5q_0$  and then divided that by the probability of survival to the start of the age group (7 days), using the following equation:

$$q_{lnn} = \Pr(\text{death in } lnn \mid u5 \text{ death}) * 5q_0 / (1 - q_{enn})$$

where *lnn* refers to late neonatal.

We calculated probability of death for the post-neonatal and 1–4-year age groups in the same way.

### Section 2.2.11: Identify and remove outliers from age and sex models

There were several criteria for removing outliers from the under-5 age-sex pattern model.

For the sex model, we outliered non-VR datapoints from locations with high-quality VR data (based on the GBD VR quality rating system) to ensure the model followed the highest-quality data.

For the age model, we outliered the following:

1. VR data that were incomplete. We compared the nine-year rolling average of the  ${}_5q_0$  value from the VR data to the nine-year rolling average of the  ${}_5q_0$  estimates and then the raw data value of  ${}_5q_0$  to the final  ${}_5q_0$  estimate for each data-year. We outliered data for which the second comparison yielded a ratio of 0.85 or less, unless the ratio of the nine-year rolling average was above 0.85.
2. Data that were identified as outliers earlier in the  ${}_5q_0$  analysis.
3. CBH datapoints from more than 15 years before the survey was administered.
4. CBH data in locations with both VR and CBH data, but only if the data conflicted.
5. Some datapoints were manually outliered for various reasons. For example, the definition of a livebirth included a minimum weight requirement in some eastern European countries before the 1990s, which led to inconsistencies in livebirth data over time. We therefore outliered age group data in ages that would include childbirth deaths when and where the definition of livebirth included a minimum weight.

### Section 2.2.12: Under-5 death number estimation

We estimated the number of under-5 deaths by ageing birth cohorts through our estimated age-sex-specific probabilities of death. To do this, we divided the number of births for each location-year into weekly birth cohorts and moved these cohorts through our mortality estimates in weekly increments. This process produced estimates of the number of person-years and deaths in each under-5 age group.

## Section 2.3: Estimation of adult mortality rate<sup>7</sup>

### Section 2.3.1: Data sources

#### *Adult population estimates*

We used multiple data types to estimate adult mortality rate, including VR systems; surveys and censuses, from which we extracted household death recall data; the SRS in India; and the DSP system in China.

#### *VR/SRS/DSP*

Refer to section 2.2.1 for details on how we identified and prioritised VR, SRS, and DSP data.

#### *Household recall of deaths*

Household death recall modules can be found in censuses and surveys, where the information on the number of deaths that occurred in each household over a specific recall period is collected. Information on the number of usual residents in the household for the same recall period is collected as well. Such information, combined, can be used to adjust data deemed incomplete in the recall of household deaths to generate sex-specific and age-specific mortality rates.

#### *Sibling survival histories*

We also acquired sibling survival history data from surveys where participants are asked about the status of their siblings (alive or dead). Surveys were deemed usable if they asked participants to provide a full account of all siblings (children born to the same mother), including each sibling's year of death and age at death (if applicable), year of birth, and sex.

### Section 2.3.2: Completeness assessment: death distribution methods and completeness estimates synthesis

As with under-5 mortality VR data, we assessed the completeness of available adult mortality VR data. For this study, we applied a suite of death distribution methods (DDMs) as well as our findings about under-5 VR data completeness to make this assessment.<sup>20</sup> We used the three DDMs most common in demography: generalised growth balance (GGB), synthetic extinct generation (SEG), and a combined approach (GGBSEG),<sup>21–25</sup> which estimate completeness by comparing the age distribution of the population between two censuses with the age distribution of deaths between those same censuses. Starting in GBD 2019, we also used two additional methods that utilise the GBD Bayesian Population Model, which only differ in whether the proportion of net migrants is also estimated in addition to completeness.

To test performance of the various methods, we simulated census and VR data while varying the level of VR completeness and factors that may bias completeness estimates, including total population size and age-structure, census completeness, net migration, and extent of age-misreporting in census and VR data. We used the Cohort Component Method of Population Projection (CCMPP) in the GBD Bayesian Population Model to estimate completeness of VR in between censuses.<sup>20</sup> This ages a population forward in time using CCMPP with the input mortality data and estimates of completeness in order to match the population at the second time point. For each of the five methods (new and traditional) we tested 105 age trims ranging from a starting age of 5 and an end age of 95. Table B shows the top ten age trims by method.

Table B

| Rank | CCMP fixed migration |              | CCMP not fixed migration |              | GGB            |              | GGBSEG         |              | SEG            |              |
|------|----------------------|--------------|--------------------------|--------------|----------------|--------------|----------------|--------------|----------------|--------------|
|      | Start age trim       | End age trim | Start age trim           | End age trim | Start age trim | End age trim | Start age trim | End age trim | Start age trim | End age trim |
| 1    | 55                   | 95           | 25                       | 95           | 5              | 70           | 5              | 70           | 45             | 85           |
| 2    | 65                   | 95           | 25                       | 90           | 15             | 65           | 10             | 70           | 40             | 85           |
| 3    | 55                   | 90           | 35                       | 95           | 10             | 65           | 5              | 75           | 50             | 95           |
| 4    | 65                   | 90           | 30                       | 95           | 20             | 65           | 15             | 65           | 45             | 95           |
| 5    | 45                   | 95           | 20                       | 95           | 5              | 85           | 20             | 65           | 55             | 85           |
| 6    | 60                   | 95           | 15                       | 95           | 5              | 60           | 15             | 70           | 50             | 85           |
| 7    | 50                   | 95           | 35                       | 90           | 10             | 85           | 10             | 60           | 40             | 90           |
| 8    | 45                   | 90           | 45                       | 95           | 10             | 70           | 10             | 65           | 60             | 85           |
| 9    | 50                   | 90           | 30                       | 90           | 15             | 85           | 15             | 60           | 40             | 95           |
| 10   | 60                   | 90           | 20                       | 90           | 10             | 60           | 10             | 75           | 35             | 85           |

From the simulation testing, we found that no single method performed significantly better than the other methods, but certain age trims for each method performed significantly better than other age trims. To account for this when producing point estimates of completeness for each pair of censuses and VR data in between censuses, we excluded the highest and lowest point estimates across the five methods and only kept the three middle estimates. For each method, we only kept the top-performing age trim as ranked in our simulation testing. These three-point estimates of completeness for each census pair were then combined to form a full time series of completeness using a spatiotemporal regression model, as described below.

Our assessment used a two-stage model. We first used estimated child completeness to predict adult completeness, followed by a spatiotemporal regression model to incorporate estimates of adult completeness from the DDMs to generate a series of estimates from 1950 to 2021 of source- and country-specific adult death registration completeness. We assume that the completeness of a system changes gradually, so within the GBD standard locations, we used DDM estimates from neighbouring years to help assess the completeness of data from any given year in the study period. We also assumed that completeness was likely to be similar between countries in the same region, so we factored in completeness estimates from nearby countries as well.

We calculated child completeness as the ratio of observed child mortality to estimated child mortality in a given source, country, and year, using the estimation process described in section 2.2. While data were only available from certain years for an individual country-source, we made a complete time series of child completeness estimates using a smoothing process. When a country-source had no more than three years of data, we assumed a constant level of child completeness that matched the mean of the available years' completeness. When a country-source had more than three years of data, we used a Loess regression to fill in gaps in the time series. In cases where we had to make out-of-sample estimates (country-sources without data from 1950 or 2021), we held child completeness constant before the first and after the last observation instead of using the Loess regression to predict completeness levels. When a country-source had a gap of more than five years between data, we filled in the gap with a linear interpolation of the two closest observations instead of using the Loess regression.

After estimating child completeness, we conducted our first-stage regression using simple linear regression of calculated adult completeness on child completeness, and predicted adult completeness using the obtained coefficients for VR, SRS, DSP, medical certification of causes of death (MCCD), and civil registration (CR) sources in log space, using the following formula:

$$\hat{\mu}(\log(\text{Adult completeness})) = \hat{\beta}_0 + \hat{\beta}_1 * \log(\text{Child completeness})$$



For other sources, we assumed completeness for the first stage due to lack of child mortality data. In our second-stage model, we took the residuals from the first-stage regression and applied spatiotemporal smoothing to the residuals, in order to borrow strength across the full time series and nearby locations. We then produced draw level estimates of completeness using the calculated prediction from stage 1 as the mean, and the standard deviation calculated from the smoothed residuals for stage 2 assuming a normal distribution. After setting logged completeness to 0 for estimates greater than 0, we produced final estimates and uncertainty from the anti-logged individual truncated draws.

For VR, SRS, and DSP sources, we considered country-years that had completeness estimates of 95% or higher to be 100% complete. We then scaled completeness values between 90% and 95% up to 100% as follows:

$$\text{scaled completeness} = 0.9 + 2 (\text{estimated completeness} - 0.9).$$

We also assumed that if a country-source was complete across the full time series, its subnational locations were complete as well. Our exceptions to this assumption were Brazil and Iran, where we found that level of completeness differed across subnational locations, despite a complete and accurate time series at the national level.

### Section 2.3.3: Sibling survival method

While VR systems are the preferred sources for adult mortality rates, in countries with few to no data from a working VR system, adult mortality rates can be derived from sibling survival modules, which provide much-needed information on the level and trends of adult mortality. We define a sibship as a group of offspring who have the same biological parents. Without necessary adjustment, adult mortality estimates from sibling survival modules are biased in four primary ways, resulting from the design and implementation of the method:<sup>26</sup>

1. Selection bias (under-representation of siblings from sibships with high mortality)
2. Zero reporter bias (sibships not represented in the survey due to sex composition and/or absence of any alive sibling of a sibship by the time of the interview)
3. Sparse data
4. Recall bias (under-reporting of deaths of siblings living in different places, having died in the distant past, or for any other reason that the respondent could not recall the death).

The technique we used to estimate adult mortality from sibling survival data and minimise bias was based on methods in Obermeyer and colleagues,<sup>26</sup> with the following changes to their methods:

1. Incorporated appropriate survival weights that accounted for the study design
2. Implemented a zero-survivor correction that accounted for mortality in families who were under-represented in the data because none of the siblings were alive to participate in the survey
3. Refined recall bias adjustment.

The correction to account for mortality in sibships with high mortality rates, proposed by Gakidou and King,<sup>27</sup> incorporates a sibship-level weight:

$$W_j = \frac{B_j}{S_j}$$

Where

$j$  is a given sibship

$B_j$  is the original size of sibship  $j$

$S_j$  is the number of siblings in sibship  $j$  who survive to the time of the survey

We used the Gakidou-King (GK) weight on observations being analysed at the sibship level to compute the weighted average of the proportions of siblings who had died, as reported by each respondent. The weight corrected for under-representation of high-mortality sibships.

Since we analyse data at the sibling level (with one observation for each sibling instead of for each sibship), we also used the following sibling-level weight:

$$W_i = \frac{1}{S_j}$$

for sibling  $i$  in sibship  $j$ .<sup>28,29</sup>

Previously, we applied the GK sibship-level weight to data that had been disaggregated to the sibling level, which led to inaccuracies in the estimates. Our sibling-level weight overcomes this challenge.

Eligibility criteria for different surveys also needed to be factored into the correction.<sup>28</sup> In GK's survivorship correction,  $\frac{S_j}{B_j}$  refers to the probability that a sibling in sibship  $j$  survived and was eligible to be selected as a survey participant. For instance, only women between the ages of 15 and 49 are eligible to participate in DHSs, so for DHS data,  $S_j$  refers to the number of surviving women in sibship  $j$  who were aged 15-49 at the time of the survey. For this study, we made the  $S_j$  value consistent with the eligibility criteria for each survey.

As previously discussed, the sampled population in sibling histories did not include sibships that had no eligible siblings to participate in the surveys. As a result, these sibships are not present in the data. To account for this, we estimated the number of deaths among missing sibships by age and sibship size using a zero-survivor correction. We then added these estimated siblings to the observed sample before calculating age-specific mortality rates.

We applied the zero-survivor correction to sibships with one or two female siblings. It factored in the true number of sibships with one (or two) females as it related to the cumulative probability of dying before the time of the survey. The result of the correction was an estimate of the number of missing sibling deaths. For one-sibling sibships, we used the following formula:

$$K_{obs}^1 = K_{true}^1 * (1 - {}_a q_0^1)$$

$$K_{miss}^1 = K_{true}^1 * {}_a q_0^1$$

Where

$K_{obs}^1$  is the number of sibships with one sister that were observed in the sample

$K_{true}^1$  is the true number of sibships with one sister in the sample

$K_{miss}^1$  is the number of sibships with one sister that were not represented in the sample due to no surviving sibling

${}_a q_0^1$  is the probability of death between birth and age  $a$

$(1 - {}_a q_0^1)$  is the probability that the sister survived to the time of the survey

We were able to determine that the number of sibships with only one sister that were not represented in the sampled population as a result of zero-survivor bias was:

$$K_{miss}^1 = \frac{K_{obs}^1}{1 - {}_a q_0^1} \times {}_a q_0^1$$

We then multiplied the estimated number of missing sibships ( $K_{miss}^1$ ) by the number of females in the sibship (one, in this instance) to estimate the number of females missing from each age group because they had died. We made each missing female one observation point, assigned birth and death dates based on the distribution in the sampled population, and added them to the dataset. We conducted the same process with families with two sisters using the formula below:

$$K_{obs}^2 = K_{true}^2 * (1 - {}_a q_0^1 * {}_a q_0^2)$$

$$K_{miss}^2 = K_{true}^2 * {}_a q_0^1 * {}_a q_0^2$$

$$\therefore K_{miss}^2 = \frac{K_{obs}^2}{1 - {}_a q_0^1 * {}_a q_0^2} * {}_a q_0^1 * {}_a q_0^2$$

Where

$K_{obs}^2$  is the number of sibships with two sisters that were observed in the sampled population

$K_{true}^2$  is the true number of sibships with two sisters in the population

$K_{miss}^2$  is the number of sibships with two sisters that were not represented in the sampled population due to zero-survivor bias

${}_a q_0^1$  is the probability of death for the first sister between birth and age  $a$

${}_a q_0^2$  is the probability of death for the second sister between birth and age  $a$ .

In two-sister sibships with only one 15- to 49-year-old sister, we used the following equation to account for the second sister not contributing to the probability of the sibship being observed in the sample:

$$K_{obs}^2 = K_{true}^2 * (1 - {}_a q_0^1)$$

$$K_{miss}^2 = K_{true}^2 * {}_a q_0^1 * {}_a q_0^2 + K_{true}^2 * {}_a q_0^1 * (1 - {}_a q_0^2)$$

$$\therefore K_{miss}^2 = \frac{K_{obs}^2}{1 - {}_a q_0^1} * {}_a q_0^1 * {}_a q_0^2 * \frac{K_{obs}^2}{1 - {}_a q_0^1} * {}_a q_0^1 * (1 - {}_a q_0^2)$$

The original methods developed by GK and Obermeyer and colleagues used a logistic regression to account for bias in the time period before the survey.<sup>26,27</sup> For this study, however, we used an updated method to adjust for recall bias. Once we had estimated the probability of death between 15 and 60 years ( ${}_{45}q_{15}$ ) from each survey, we paired up estimates that overlapped the same time period. Overlaps occurred in countries and territories where at least two surveys were conducted within 15 years of one another, since we included 15 years of recall. For each year with overlapping surveys, we computed the difference in the years of recall as the number of years between surveys. We quantified the relationship between years of recall and level of mortality for each sex of sibling using the following linear regression model:

$$\Delta({}_{45}q_{15})_{i,j} = \beta \times \Delta(\text{survey date})_{i,j} + \xi$$

Where

$\Delta(45q_{15})_{i,j}$  is the difference in  $45q_{15}$

$\Delta(\text{survey date})_{i,j}$  is the difference in survey date

$j$  is the survey pair

$i$  is the country

We also calculated 95% UIs.

We adjusted the  $45q_{15}$  estimates to account for recall bias using the period coefficient.

### Section 2.3.4: $45q_{15}$ data synthesis using non-linear mixed effects model and ST-GPR

#### *Overview of adult ( $45q_{15}$ ) mortality estimation*

We produced a time series of  $45q_{15}$  estimates for each location in the GBD hierarchy. For each location, we modelled the underlying mortality risk separately from excess mortality due to fatal discontinuities. We used a three-stage process to model underlying mortality risk. Through this process, we incorporated all available data for each country and territory that had not been outliered or excluded due to conflict or natural disaster. Broadly, we implemented the following in each stage of the model:

1. Applied a nonlinear mixed effects model that used covariates to explain variation in the mortality rate for the 15 to 59-year age group ( $45m_{15}$ ).
2. Smoothed residuals between input data and the first-stage prediction. We then added the smoothed residuals back into the first-stage regression predictions. Through this, we generated a complete time series of prior  $45q_{15}$  for each location.
3. Produced final estimates using the prior generated from the first two steps and input data on adult mortality rates.

After completing these three stages, we modelled shocks to mortality by estimating the excess risk of mortality in country-years in which a natural disaster or conflict occurred. We then added the estimated excess mortality risk to the underlying mortality risk to generate final time series estimates of  $45q_{15}$ . A full description of the stages from this modelling strategy can be found below.

#### *First-stage nonlinear mixed effects regression*

The first stage of the adult mortality model was a nonlinear mixed effects regression. This regression produced adult mortality rate estimates for each location, year, and sex. We incorporated the following covariates: lag-distributed income per capita, mean years of education in the 15 to 59-year age group, crude death rate due to HIV/AIDS in the 15 to 59-year age group, and estimated  $5q_0$  from our study. We also included a fixed effect on sex, which allowed us to fit the model using males and females together. The equation for the nonlinear mixed effects regression was as follows:

$$45m_{15}^{observed}_{s,c,t,i} = \exp(\alpha_s + \gamma_c + \beta_1 \cdot Edu_{s,c,t} + \beta_2 \cdot \ln(LDI_{c,t}) + \beta_3 \cdot 5q_{0,c,t}) + \beta_5 \cdot HIV + \mathcal{E}_{s,c,t,i}$$
$$\gamma_c \sim N(0, \sigma_c^2)$$

Where

$s$  is sex,  $c$  is location,  $t$  is time for datapoint  $i$

$Edu$  is the mean years of education for the age group 15 to 59

$LDI$  is lag-distributed income

${}_5q_0$  is probability of death from birth to age 5 years

$\alpha_s$  is a fixed intercept for sex

$\gamma_c$  is a country- or territory-level random effect

$HIV$  is the crude mortality rate from HIV for ages 15 to 59

The predictions generated through stage one of the model were based on predictions from the above equation, but without the location-level random effect. We did this to enable the modelling of spatial mortality trends in the next stage. After predictions were generated, we converted them from mortality rates to probabilities so they could be used in the second stage. When converting from mortality rate ( ${}_n m_x$ ) to probability of death ( ${}_n q_x$ ), we assumed a constant mortality rate within the 45-year wide age group.

### *Second stage spatiotemporal smoothing of residuals*

We used the second stage of the regression model in part to capture more fully the pattern of variation in  ${}_{45}q_{15}$  that the covariates could not account for. To do this, we smoothed residuals across time and among locations within the same GBD region.

We fit the local regressions for each of the 21 GBD regions. These local regressions included two variations, both of which used the same weighting scheme for incorporating spatial and temporal correlations. Both variations included conducting weighted linear regressions for each location-year of interest. A description of the weighting scheme that was used in both variations is described below, followed by a description of the two variations.

For each location-year regression, we weighted all the residuals with respect to that location and year. We first weighted residuals with respect to time using the following weighting function, which was similar to the one used in the U5MR estimation process:

$$w_t = \left( 1 - \left( \frac{|r_t - r_{est}|}{1 + \operatorname{argmax}_t |r_t - r_{est}|} \right)^\lambda \right)^3$$

Where

$r_t$  is the year of interest

$r_{est}$  is the year of the residual being weighted

$\operatorname{argmax}_t |r_t - r_{est}|$  is the maximum distance between the year of interest and a residual within the region

The  $\lambda$  parameter determined how quickly the weights diminished over time, with a smaller  $\lambda$  reflecting a more rapidly diminishing weight over time than a larger  $\lambda$ .

Second, we weighted residuals with respect to space using the weighting function below, which was applied to the modified time weights. We multiplied the weight of residuals for each country of interest by a factor of:

$$\frac{\zeta \sum_{i \notin c_{est}} w_i}{(1 - \zeta) \sum_{i \in c_{est}} w_i}$$

Where

$c_{est}$  is the location of interest

$w_i$  is the time weight

Applying this formula meant that  $100 \cdot \zeta\%$  of the weight was placed on residuals in a single country or territory, with the remaining  $100 \cdot (1 - \zeta)\%$  placed on residuals from other countries or territories in the same region. We applied a factor of 0 to countries and territories that had no residuals (ie, those with no data), which meant they were not re-weighted. For those locations, all the weight was consequently applied to the other countries in the region. We set  $\lambda$  and  $\zeta$  based on each location's data density.

The first local regression variation, or the linear local regression, was a weighted linear regression of the residuals by country-year. It was an indicator of the residual from the country or territory being assessed and was estimated using the following equation:

$$r_{est} = \beta_0 + \beta_1 t + \beta_2 c_{est} + \mathcal{E}$$

We dropped the indicator if it could not be estimated due to the country or territory not having any residuals.

The second variation was a simple weighted average of the residuals in the country or territory being assessed.

We combined the estimates from both variations. The local linear regression included covariates such as year, but in locations with sparse data, this led to implausible out-of-time sample predictions because the extrapolation relied so heavily on the covariate information. The second variation did not include an explicit time trend, so it did not have the same problem with out-of-time sampling, but it was less equipped to fit the data in data-rich countries and territories.

Using the equation below, we then calculated the data density ( $d_c$ ) in each country and territory of interest ( $c_{est}$ ) and from that, the weighted average of the predictions from the two local regression variations, with  $d_c\%$  of the weight assigned to the linear local regression and the remainder to the fixed effects local regression. This gave appropriate weight to each of the variations based on completeness of VR data in each location.

$$d_c = 100 \times \left( \frac{\# VR \text{ points in } c_{est}}{\text{Maximum \# VR points in any country in the region}} \right)$$

We logit-transformed the residuals before smoothing. We used the smoothed residuals to adjust the logit-transformed predictions from the first-stage regression, before reverse-logit transforming this estimate. Because we conducted the first two stages in logit-space, our predictions' domain was restricted to the range between 0 and 1. We called these the second-stage predictions.

### *Model*

We used a GPR model for the third stage of our prediction model. The equation was as follows:

$$\mu_{t,c} = f_c(t) + S_{t,c}$$

$$f_c(t) \sim GP(M, C)$$

Where

$t$  is time,  $c$  is location

$\mu_t$  is the true  $\log_{10}(45q_{15})$

$f(t)$  is the baseline mortality risk

$S_t$  captures excess mortality due to war and disasters and is estimated independently of  $f(t)$

$M$  is the Gaussian process mean function

$C$  is the Gaussian process covariance function

Because the Dominican Republic, Peru, Madagascar, and Morocco had very different estimates from sibling histories versus VR systems and we could not determine the direction of the bias in each source, we used a slightly different model from the one above. For these countries, we instead used a model that included a bias term for each source ( $\beta_s$ ):

$$\mu_{t,c} = f_c(t) + \beta_s + S_{t,s}$$

$$\beta_s \sim \text{Normal}(0, 0.01^2)$$

$$f_c(t) \sim \text{GP}(M, C)$$

As with  ${}_5q_0$  (see section 2.2.6), the prior distribution of  $f(t)$  was based on second-stage predictions as the mean prior ( $M$ ) and a Matérn covariance function as the covariance prior ( $C$ ). The covariance function included three parameters: scale, amplitude, and degree of differentiability. Respectively, these parameters controlled the distance over which the function was correlated; controlled the amount by which estimates from the Gaussian process distribution could deviate from the mean function; and influenced sample smoothness from the Gaussian process. The selection of these and other hyperparameters is explained in the next section. For more details about GPR and the Matérn covariance function, see section 2.2.6.

#### *Hyperparameter and parameter selection for adult mortality rate ST-GPR*

The following hyperparameters and parameters are used:

- Stage 2 (Space-time smoothing)
  - Zeta
  - Lambda
- Stage 3 (Gaussian process)
  - Scale
  - Amplitude
  - Degree of differentiability

Similar to selecting parameters for U5MR, we selected zeta, lambda, and scale hyperparameters for adult mortality based on a data density score. We calculated the data density score for each location and sex based on the number of sibling histories and number of deaths, following the steps outlined below:

1. Calculated the death number score based on the number of deaths calculated during the DDM component of the model, including unadjusted complete deaths and adjusted deaths from incomplete sources.
2. Assigned a score of 15 for each sibling history for a single location, year, and sex.
3. Added the death counts and sibling history scores together for each location, year, and sex; capped the resulting number at 1000 and then divided the number by 1000. The result was a score of 0 to 1 for each location, year, and sex.
4. Added the score for each year in the full time series to calculate the final complete VR score for each location and sex, over the study period.
5. Assigned the following parameters based on the data density for each location (table C).

*Table C*

| Data density | Zeta | Lambda | Scale |
|--------------|------|--------|-------|
| 0 to 9       | 0.6  | 0.7    | 25    |
| 10 to 19     | 0.7  | 0.5    | 20    |
| 20 to 29     | 0.8  | 0.4    | 15    |

|          |      |     |    |
|----------|------|-----|----|
| 30 to 49 | 0.9  | 0.3 | 10 |
| 50 plus  | 0.99 | 0.2 | 5  |

To develop the data density score system, we conducted iterative testing that accounted for the assumption that sources such as complete birth histories and complete VR systems are more susceptible to non-sampling measurement error than other sources. We tested different cutoffs for VR deaths to account for sample size. We also conducted iterative testing and refinement for weights.

To get the *amplitude* parameter for GPR, we first calculated the variance of logit-difference between the first-stage and second-stage predictions in high data-density years separately by location. Then, this location-specific variance was used as amplitude for countries with complete VR and the mean of these variances was used as amplitude for countries with incomplete VR.

The *degree of differentiability* parameter for GPR was selected as 1.

#### Data variance

We calculated data variance for each  ${}_{45}q_{15}$  empirical observation using different methods depending on the type of data.

For sampling variance of  ${}_{45}m_{15}$ , we used the following binomial distribution:

$$\frac{p(1-p)}{N}$$

Where

$N$  is the national population aged 15 to 59 years

$p$  is the mortality rate,  ${}_{45}m_{15}$

We then used the delta method to transform variance into  $\log_{10}({}_{45}q_{15})$  space. For estimates that came from a combination of complete and incomplete VR data, we added the sampling variance (calculated for complete VR data) and the variance based on the level of estimated completeness from DDM synthesis (calculated as in section 2.2.6) together to get the total data variance.

For estimates that came from survey, sibling history, or census data, we calculated the mean absolute derivation (MAD) estimator of the variance by source type using the second-stage predictions. We employed the following equation:

$$\begin{aligned} \theta_s^2 &= (1.4826 \cdot MAD_s)^2 \\ &= 1.4826 \times \text{median}(|(\log_{10}({}_{45}q_{15}^{\text{observed}}) - \log_{10}({}_{45}q_{15}^{\text{predicted}})) \\ &\quad - \text{median}(\log_{10}({}_{45}q_{15}^{\text{observed}}) - \log_{10}({}_{45}q_{15}^{\text{predicted}}))|)^2 \end{aligned}$$

Where  $s$  is the source type (sibling history, census, or survey).

#### Section 2.3.5: Identify and remove outliers

We excluded certain implausible outliers from the ST-GPR regression. We generally outliered raw datapoints that met one of the following criteria:

1. Raw input  ${}_{45}q_{15}$  datapoints from years affected by natural disasters, wars, and other fatal discontinuities defined elsewhere<sup>3</sup> based on the analysis explained in section 2.6.3.



2. Raw datasets with poor quality data, as determined by examining the dataset. Examples include Afghanistan 2010 Mortality Survey, which was not nationally representative, and VR data from Serbia that excluded deaths from Kosovo.
3. Raw input data and time series estimates of  ${}_{45}q_{15}$  that were unexplainably different from adjacent points from a similar source, as determined by visual inspection. Unexplained differences indicated a data reporting issue and compilation error in the direct sources.
4. Subnational-level single-year  ${}_{45}q_{15}$  estimates from sibling survival methods that had implausibly high or low estimates due to small sample sizes.

### Section 2.3.6: Scale subnational estimates to national level (excluding South Africa)

As described in section 2.2.8, a strength of GBD is that we ensure consistency throughout our location hierarchy, meaning that subnational mortality estimates always add up to national mortality estimates. National-level data were typically more robust, included more data sources, and spanned longer time periods. To eliminate any correlation between subnational and national draws that was introduced earlier in the model, we randomised the order of the 1000 draws at the subnational and national levels. Then, to ensure consistency between the aggregated subnational-level and separately estimated national-level estimates, we raked subnational  ${}_{45}q_{15}$  to the national level using the following formula:

$${}_{45}q_{15}^{s'} = 1 - e^{-45 \times {}_{45}M_{15}^s \times r}$$

And

$$r = \frac{\frac{\ln(1 - {}_{45}q_{15}^N)}{-45}}{\sum_{s=1}^n \frac{\ln(1 - {}_{45}q_{15}^s)}{-45} \times \frac{p_s}{p_N}}$$

Where

$s$  is subnational locations within country  $N$

$p$  is population in age group 15 to 59

${}_{45}q_{15}$  is the estimate of adult mortality rate from the ST-GPR process

${}_{45}q_{15}^{s'}$  is the post-scaling  ${}_{45}q_{15}$  for subnational locations

As with  ${}_{5}q_0$ , South Africa was the one country where we did not use this method, because HIV/AIDS is such a large contributor to mortality. We instead aggregated provincial-level estimates to the national level using population for the corresponding age group as weights.

## Section 2.4: Model life table system<sup>7</sup>

### Section 2.4.1: Overview

We used model life tables (ie, structured relationships between levels of age-specific mortality at different ages) to generate estimates of age-specific mortality for detailed age groups using summary  ${}_{5}q_0$  and  ${}_{45}q_{15}$ . In particular, we relied on this method for location-years without VR systems as well as recent years for locations with high-quality VR systems, because it can take several years for VR data to be published after collection.

Ideally, a model life table system has the following attributes. First, it should only require a few entry parameters to generate a full life table. Second, it should accurately reflect the age patterns of mortality observed in real populations. Third, it should make reasonable estimates of age-specific mortality in countries and territories that have high levels of mortality, particularly those with large HIV/AIDS epidemics. Fourth, it should produce realistic age-specific mortality time trends. Fifth, age-specific mortality should be positively related to entry parameters such as  ${}_{5}q_0$  and  ${}_{45}q_{15}$ .

For this as well as earlier GBD iterations, we used a relational model life table system akin to the one proposed by Brass and Coale.<sup>22</sup> They posited that the logit-transformed survival curves from two life tables can be linearly related to each other. Murray and colleagues found, however, that as mortality levels in a population moved further from the reference standard, the linearity in logit  $lx$  space no longer held true.<sup>30</sup> They instead proposed a set of bend factors to account for the deviation from linearity. This modified logit life table system also gives users the option to predict  $_{45}q_{15}$  from  $_{5}q_0$ . It has been used broadly by WHO since the early 2000s.<sup>30</sup>

Murray and colleagues' modified logit life table system does, however, have two important limitations. First, in location-years where adult mortality was much higher than child mortality, such as with the HIV/AIDS epidemic, the mortality age patterns generated by the system did not fit well to the observed mortality age patterns. Second, when the system was applied to the  $_{5}q_0$  and  $_{45}q_{15}$  time series, a contradictory pattern emerged with adult and child mortality both declining but age-specific mortality rates increasing in certain age groups.

We extended the modified logit life table system in four distinct steps, summarised below. A full description of the modifications can be found elsewhere.<sup>2,10</sup>

#### **Section 2.4.2: Building an empirical model life table database: data sources and quality review**

Relational model life table systems are heavily dependent on the empirical database used to produce the standard life tables. For the latest GBD analyses of all-cause and cause-specific mortality, we compiled 65 182 abridged empirical life tables prior to outliering or smoothing using data from full VR systems and sample VR systems such as the DSP system in China and the SRS in India. We adjusted each source by estimated completeness. For ages younger than 1 and 1 to 4, we applied under-5 completeness; for ages 15 and older, we applied adult completeness; and for ages 5 to 9 and 10 to 14, we applied a combination of under-5 and adult completeness.

For each life table in each location, we sorted by year and conducted smoothing using moving averages with widths of 3, 5, and 7 years. The smoothing helped minimise drops or jumps in age-specific mortality in locations where low mortality rates contributed to high variability in mortality patterns across years.

As with previous iterations of GBD, we developed two sets of life tables that met the inclusion criteria for this study. First, there was a universal set of life tables that could be selected for standard life table calculation for all locations. Second, there was a location-specific set of life tables that were used only for the location the data originated from. New in GBD 2021, we have location-year specific life tables, which are only used in the location and year the data originated from. Life tables that were characterised by jumps in age-specific mortality or other implausible trends due to low population or low mortality numbers contributing to inconsistent estimates, old-age misreporting or heaping, or data extraction or reporting issues were excluded.

Life table categorisation was based partially on a neural network machine vision model (based in Python, using Keras from the TensorFlow package) which was trained and deployed to separate likely outliers from likely non-outliers. This machine learning was performed for GBD 2019 and the resultant outliering was carried over into GBD 2021. All life tables were formatted and saved as .jpg plots of  $\log_{10}q_x$  over age. A random set of 6000 plots were reviewed manually for implausible age patterns to create the training set. We looked for a general age pattern of mortality among the human population, which starts with relatively high probability of death in the first year of life, followed by a drop into late childhood, and then roughly log-linear increase through most of adulthood and after, assuming there is no major epidemic of any kind. Life tables with too much noise were excluded from the universal set. A two-person review system was used to verify or modify these machine vision designations. Therefore, the machine vision was not the arbiter of inclusion, but rather a tool to facilitate speedy manual review. Outliering decisions for life tables that were added since GBD 2019 were not based on machine vision and were all investigated manually for implausible trends.

Life tables that were outliered for  $_{5}q_0$  or  $_{45}q_{15}$  estimation or had estimated completeness below 50% were also excluded from the empirical life table database. Life tables with estimated completeness between 50% and 85% were included only in the location-specific category, not in the universal set.

For some locations, life tables that did not qualify upon initial review were included as location-specific life tables, in order to improve modelled envelope fit to the VR data.

Our database of life tables that met the inclusion criteria now includes 7792 universal, 33 919 location-specific, and 2047 location-year-specific life tables, for a total of 43 758 life tables (appendix table S9).

### Section 2.4.3: Extending age-specific mortality

We extrapolated age-specific mortality up to age 105-109 using the recursive model below, fit to high-quality VR data from the Human Mortality Database:

$$\begin{aligned} \text{logit}({}_5q_{x+5}^{j,t,g}) - \text{logit}({}_5q_x^{j,t,g}) &= \beta_0^g + \gamma^{j,g} + \beta^g [\text{logit}({}_5q_x^{j,t,g}) - \text{logit}({}_5q_{x-5}^{j,t,g})] \\ \gamma^{j,g} &\sim N(0, \sigma_\gamma^2) \end{aligned}$$

Where

$j$  refers to country

$g$  refers to sex

$t$  refers to time

$\beta$  is a fixed covariate coefficient

$\gamma$  is a random intercept

This approach was first used in GBD 2019, where a difference in  ${}_nq_x$  was used to predict a difference in  ${}_nq_x$ . Previously, we had used the last (oldest age) observed level of  ${}_nq_x$  to predict the difference to the next  ${}_nq_x$  value. However, we conducted an analysis of these two extension methods and found that the newer method was a better predictor out of sample. Additionally, using the last slope to predict the next slope removed cases of sharp changes in slope in  ${}_nq_x$  that were produced by the old method.

After empirical life tables were extended to age 105-109, an iterative scaling algorithm was applied to match  ${}_5q_{95}$ ,  ${}_5q_{100}$ , and  ${}_5q_{105}$  to the observed  ${}_nm_x$  implied by VR deaths over GBD-estimated population.

Another modification, originally introduced in GBD 2019, is intended to reduce the frequency of cases where the female mortality rate becomes greater than male mortality rate in the extended ages. Life tables with male-female crossover in late adulthood were designated to the location-specific category rather than the universal life table group. The change designed to address this issue is covered in section 2.4.4.

### Section 2.4.4: GBD relational model life table system with a flexible standard selection mechanism

We based our relational model life table system on the idea that, to capture the very high levels of young adult mortality that occur in locations with high HIV prevalence, we needed to first develop a model life table for a counterfactual population without HIV and then add the effects of HIV by age and sex into that life table.

Three steps were used in developing this system. First, we estimated counterfactual levels of  ${}_5q_0$  and  ${}_{45}q_{15}$  without HIV. Second, we generated a full set of age-specific mortality rates using the counterfactual model life table system. Third, we estimated the increase in mortality when HIV was included back in, for each age group.

#### *Model for populations free of HIV/AIDS*

Our relational model life table system was different from previous systems in several ways. First, we modelled  ${}_nq_x$  rather than  $l_x$  in logit space. Modelling  ${}_nq_x$  allowed us to better capture the impacts of changes to  ${}_5q_0$  and  ${}_{45}q_{15}$  on different age groups. We used the following equation to generate life tables for populations not affected by HIV/AIDS:

$$\text{logit}({}_nq_x^c) = \text{logit}({}_nq_x^s) + \beta_x^1 \cdot (\text{logit}({}_5q_0^c) - \text{logit}({}_5q_0^s)) + \beta_x^2 \cdot (\text{logit}({}_{45}q_{15}^c) - \text{logit}({}_{45}q_{15}^s))$$

Where

$\text{logit}({}_{45}q_{15}^s)$  is the logit transformation of  ${}_{45}q_{15}$  in the standard life table

$\text{logit}({}_{45}q_{15}^c)$  is the logit transformation of  ${}_{45}q_{15}$  for a country without HIV or the counterfactual level of  ${}_{45}q_{15}$  in the absence of HIV in a country affected by HIV/AIDS

$\text{logit}({}_5q_0^s)$  is the logit transformation of  ${}_5q_0$  in the standard population

$\text{logit}({}_5q_0^c)$  is the logit transformation of  ${}_5q_0$  for a country without HIV or the counterfactual level of  ${}_5q_0$  in the absence of HIV in a country affected by HIV/AIDS

$\text{logit}({}_nq_x^s)$  is the logit of the probability of death in the standard population from age  $x$  to  $x + n$

$\text{logit}({}_nq_x^c)$  is the logit transformation of the probability of death from age  $x$  to  $x + n$  in a country without HIV or the counterfactual level of  ${}_nq_x$  in the absence of HIV in a country affected by HIV/AIDS

$\beta_x^1$  and  $\beta_x^2$  are coefficients that vary by age  $x$  and measure the impact of differences in child and adult mortality rates between a target life table and the standard life table on the estimated age pattern of mortality. These coefficients determined how much the estimated age pattern of mortality deviated from the standard by age and from linearity.

The design of this equation was based on our assumption that the logit-transformed age-specific probability of death in a target life table ( $c$ ) could be represented as a function of (1) the corresponding logit-transformed age-specific probability of death in a standard life table ( $s$ ), (2) the difference in  ${}_5q_0$  in logit scale between life tables  $c$  and  $s$ , and (3) the difference in  ${}_{45}q_{15}$  in logit scale between life tables  $c$  and  $s$ . Life table  $c$  was our life table without HIV, either with counterfactual levels of probability of death without HIV/AIDS for countries and territories affected by HIV/AIDS, or as a complete life table for countries and territories not affected by HIV/AIDS. The design of the model was informed by previous observations that in the absence of an HIV/AIDS epidemic, differences in age-specific probability of death in logit scale are correlated strongly with differences in  ${}_5q_0$  or  ${}_{45}q_{15}$  in logit scale.

We estimated the  $\beta_x^1$  and  $\beta_x^2$  coefficients using the equation below:

$$\text{logit } {}_nq_x^c - \text{logit } {}_nq_x^s = \beta_x^1 \times (\text{logit } {}_5q_0^c - \text{logit } {}_5q_0^s) + \beta_x^2 \times (\text{logit } {}_{45}q_{15}^c - \text{logit } {}_{45}q_{15}^s)$$

To estimate the parameters, we used location-time-specific standards for each of the life tables in our database that were from country-years not affected by HIV/AIDS. We used country/territory-time-specific standard life tables any time there existed in our database an observed life table from the same country within a 15-year time frame. We produced region-specific standard life tables by collapsing all the life tables in our dataset without HIV from the same GBD region by sex. Next, we paired the life tables in our dataset without HIV with the region-specific life tables we had produced.

We estimated  $\hat{\beta}_1$  and  $\hat{\beta}_2$ , the results from which are found in table D below. We restricted the effects of  ${}_5q_0$  and  ${}_{45}q_{15}$  to specific age groups to prevent improbable outputs in instances where  ${}_5q_0$  and  ${}_{45}q_{15}$  changed in opposite directions in the same population. We generated full life tables for locations without HIV/AIDS epidemics using the values in table D. We used the  ${}_5q_0$  and  ${}_{45}q_{15}$  values as our entry parameters for this model life table system.

Table D. Model life table coefficients

| Age group | Difference in ${}_5q_0$ (logit scale) |        | Difference in ${}_{45}q_{15}$ (logit scale) |        |
|-----------|---------------------------------------|--------|---------------------------------------------|--------|
|           | Male                                  | Female | Male                                        | Female |
| 0         | 1.003                                 | 1.009  | --                                          | --     |
| 1-4       | 0.978                                 | 0.954  | --                                          | --     |
| 5-9       | 0.821                                 | 0.725  | --                                          | --     |
| 10-14     | 0.455                                 | 0.378  | 0.471                                       | 0.458  |
| 15-19     | 0.218                                 | 0.251  | 0.779                                       | 0.517  |
| 20-24     | --                                    | --     | 0.754                                       | 0.901  |
| 25-29     | --                                    | --     | 0.562                                       | 0.997  |
| 30-34     | --                                    | --     | 0.591                                       | 0.984  |
| 35-39     | --                                    | --     | 0.720                                       | 0.965  |
| 40-44     | --                                    | --     | 0.847                                       | 0.955  |
| 45-49     | --                                    | --     | 0.967                                       | 0.956  |
| 50-54     | --                                    | --     | 1.005                                       | 0.957  |
| 55-59     | --                                    | --     | 1.030                                       | 0.941  |
| 60-64     | --                                    | --     | 0.974                                       | 0.855  |
| 65-69     | --                                    | --     | 0.971                                       | 0.790  |
| 70-74     | --                                    | --     | 0.934                                       | 0.770  |
| 75-79     | --                                    | --     | 0.899                                       | 0.766  |
| 80-84     | --                                    | --     | 0.815                                       | 0.701  |
| 85-89     | --                                    | --     | 0.659                                       | 0.838  |
| 90-94     | --                                    | --     | 0.641                                       | 0.724  |
| 95-99     | --                                    | --     | 1.082                                       | 1.072  |
| 100-104   | --                                    | --     | 1.188                                       | 1.087  |
| 105-109   | --                                    | --     | 1.622                                       | 1.636  |

The process we used to compute standard life tables considered observed relationships between variances in geography, time, and mortality age patterns. To produce a standard life table, we computed the Mahalanobis distance between the target life table and all the observed life tables in our database without HIV based on  ${}_5q_0$  and  ${}_{45}q_{15}$  in logit scale. We used Mahalanobis distance rather than Euclidean distance because Mahalanobis distance includes the relationship between  ${}_5q_0$  and  ${}_{45}q_{15}$  in logit space in its calculation of distances between life table pairs. We expressed the Mahalanobis distance between two sets of  ${}_5q_0$  and  ${}_{45}q_{15}$  as:

$$D_M^i(Q^i) = \sqrt{(Q^i - O)^T S^{-1} (Q^i - O)}$$

Where

$O$  is a multivariate vector representing entry parameters  ${}_5q_0$  and  ${}_{45}q_{15}$  in logit scale

$Q^i = (\text{logit}({}_5q_0^i), \text{logit}({}_{45}q_{15}^i))$  is a multivariate vector that corresponds to an empirical life table  $i$  in our life table database.

${}_5q_0$  and  ${}_{45}q_{15}$  were highly coordinated in logit space. For most super-regions, we kept the 100 life tables with the lowest Mahalanobis distance; we kept only 15 life tables for locations in the high-income super-region. We also included all the life tables in our database from the location, within 30 years. After combining all these life tables, we kept the 100 (15 for high-income locations) that were closest based on geography and distance in years.

For GBD 2017, this process was done separately by location, year, and sex. However, starting in GBD 2019, we selected life tables by location-year, but in pairs by sex. This was done to reduce unsubstantiated crossover of male and female mortality in the elderly. The result is that the life tables selected for males for a given location-year are from the same location-years as the life tables selected for females for that same location-year. For GBD 2021, to better capture the effects of the COVID-19 pandemic, data from pandemic affected years (2020-2021) were only used for estimation in the location-year of origin, and if VR was present, only the empirical life table (ELT) was used to create the standard life table. This was done to

prevent data from before the pandemic affecting the mortality trends of during-pandemic estimates and vice versa. We then calculated the weighted average of the selected life tables by applying empirical weights to each table.

Figure A. Empirical weights by lag in time and geographic region for males

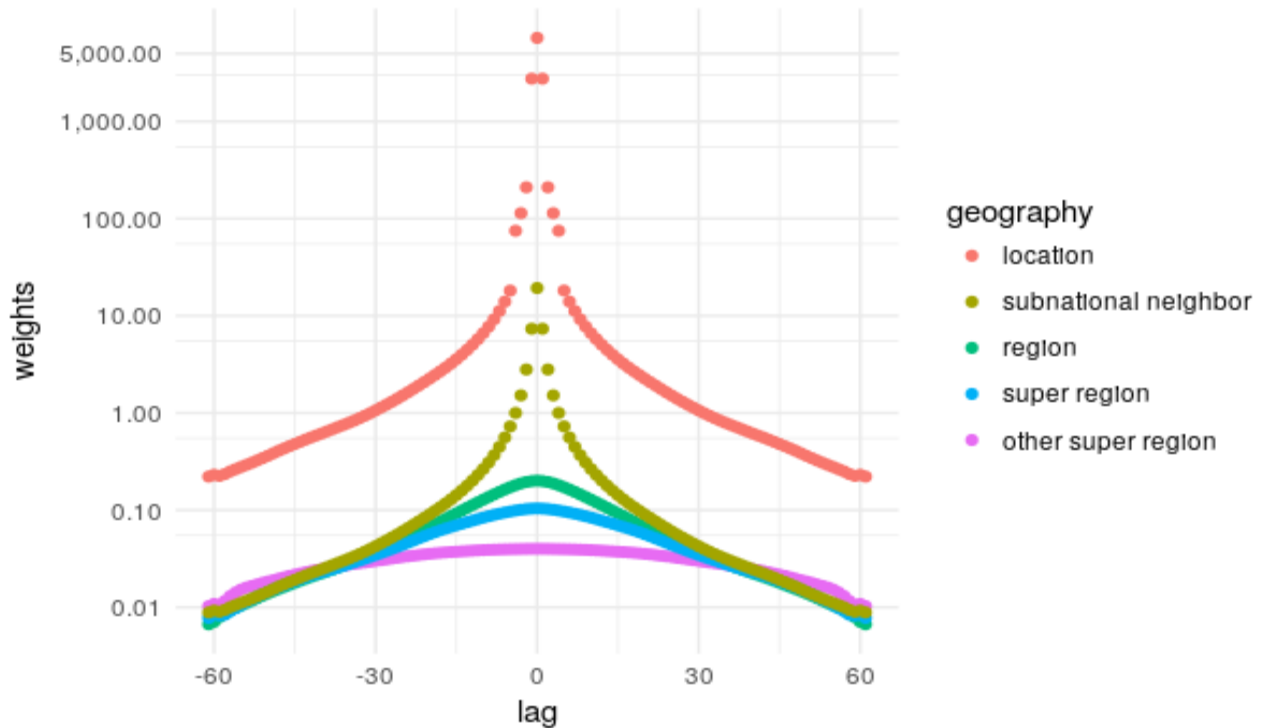

### Estimating HIV/AIDS

Unlike other existing model life table systems, our system provides a solution to the challenge of incorporating deaths from HIV/AIDS. Since GBD 2016, we have incorporated an updated process to estimate the HIV counterfactual mortality age pattern (see section 2.6) using HIV counterfactual  ${}_5q_0$  and  ${}_{45}q_{15}$  as entry parameters. We then added excess mortality due to HIV/AIDS to the under-5 and 15–59 summary age groups as well as specific age groups by location, year, and sex to the age-specific mortality without HIV. For the age-specific step, we used the Spectrum HIV model to extract the number of deaths due to HIV/AIDS and calculated the relative risk (RR). We defined RR as the ratio of HIV-specific mortality between a specific age group and the 40 to 44 age group, using the following equation:

$$R_i = \frac{nM_x^{HIV}}{{}_5M_{40}^{HIV}}$$

Where  $i$  indicates different age groups 0, 1–4, 4–9, 10–14, etc.

We ran the Estimation and Projection Package (EPP)/Spectrum at the 1000-draw level, for draws of the RR of death from HIV/AIDS by location, sex, and time.

### Estimating all-cause mortality for South Africa

We followed the steps for incorporating HIV/AIDS into all-cause mortality described in the previous section for all locations, except South Africa. For estimating all-cause mortality in South Africa, we instead performed the steps in reverse order. South Africa has a near-complete VR system, so we estimated all-cause mortality with HIV using observed VR and then removed excess mortality due to HIV using the RR of death from HIV estimated in the Spectrum model.

This method allowed us to match the completeness-adjusted VR data by age, and the age pattern of HIV-specific mortality matched the age pattern from the EPP/Spectrum epidemiological model.

### *Uncertainty in the estimated life tables*

One strength of our model is that we included uncertainty in each step of the mortality estimation process. We followed the method described in King and colleagues<sup>31</sup> and incorporated uncertainty from the entry parameters ( ${}_5q_0$  and  ${}_{45}q_{15}$ ) and the coefficients of each model. In short, we repeated the model life table process described in the previous sections 1000 times based on randomly paired entry parameters (ie, different standard life tables) and model coefficients. The result was wide UIs for mortality estimates in countries and territories where uncertainties in the estimated entry parameters were high.

#### **Section 2.4.5: Rake subnational life tables to national level (excluding South Africa)**

As explained in previous sections, for all countries and territories excluding South Africa, we raked subnational-level estimates to separately estimated national-level estimates. We did this because we require subnational mortality estimates to add up to national estimates, and data at the national level were generally more robust than at the subnational level.

For South Africa, we instead aggregated subnational-level estimates from our EPP-Spectrum model as our national-level estimates. As explained briefly in previous sections, we did this because the substantial heterogeneity in HIV/AIDS mortality rates at the subnational level in South Africa made it difficult to accurately estimate all-cause and HIV cause-specific mortality at the national level. We used all subnational child and adult mortality data available. The number of data sources was similar at the national and provincial levels.

### **Section 2.5: HIV/AIDS estimation<sup>7</sup>**

#### **Section 2.5.1: Age-specific mortality (with and without HIV)**

We used age-specific mortality rates with-HIV and without-HIV from the model life table process as inputs to the HIV/AIDS estimation described in this section.

#### **Section 2.5.2: HIV-free survival rates (for Spectrum)**

Our inputs for Spectrum were single-year HIV-free mortality based on five-year abridged life tables, generated from the age-specific HIV-free survival probabilities produced through the process described above.

#### **Section 2.5.3: EPP and Spectrum**

For our HIV analysis, we modified two tools developed by the Joint United Nations Programme on HIV/AIDS (UNAIDS):

1. EPP and EPP-Age Sex Model (EPP-ASM):
  - a. These tools generate HIV burden estimates in line with observed prevalence data. They incorporate many of the same assumptions as Spectrum. EPP fits a simpler model to HIV prevalence data from representative surveys and surveillance sites to estimate prevalence and incidence for the 15–49-year age groups. EPP-ASM incorporates the full population project of Spectrum and produces age-sex-specific prevalence, incidence, and mortality.
  - b. We modified EPP-ASM by building a paediatric module that mirrored that of Spectrum. Perinatal and breastfeeding transmission was calculated as a function of prevalence among pregnant women and maternal-to-child transmission programme data. We additionally improved the fit to prevalence data by allowing flexibility in the age distribution of incidence over time. We parameterised the ratio of incidence among ages 15–24:25+ as a constant before year 2000 and a linear regression thereafter. This allowed for the shifts in the age distribution of incidence observed over the course of the HIV epidemic to be reflected in our results.
2. Spectrum natural history model:
  - a. This model generates HIV incidence, prevalence, and death by age, sex, and year using time series estimates of HIV incidence, demographic inputs (such as HIV-free mortality and population), assumptions about CD4 progression rates, and assumptions about on-antiretroviral therapy (ART) and off-ART HIV mortality rates by age, sex, and CD4 rate. We used treatment coverage time series from UNAIDS.
  - b. We made several modifications after creating a replica of Spectrum in Python (starting with GBD 2013). First, we sex-split incidence based on a model that was fit to the sex ratio of observed prevalence in countries and territories with nationally representative surveys. Second, our child model included CD4 progression and CD4-specific mortality rates that came from a model fit to survival data from the International epidemiology Databases to Evaluate AIDS (IeDEA), as well as ART distribution data from



leDEA. Additionally, we scaled all input values by a uniformly sampled factor between 0.9 and 1.1 to generate estimates with realistic ranges of uncertainty.

#### Section 2.5.4: HIV mortality reckoning

We used the reckoning process to reconcile separate estimates of HIV mortality produced by two different estimation processes in the GBD framework. The separate estimates were those from the model life table system and from the natural history model of EPP-Spectrum. We also used space-time GPR-smoothed VR data on HIV-specific mortality in countries and territories with high-quality VR systems instead of mortality estimates from Spectrum.

We assigned all GBD 2021 locations to a modelling strategy group (appendix table S10) based on the level of HIV in the country or territory and the completeness of HIV and VR data. The group a location was assigned to determined which sources we used for HIV-specific mortality data and how we calculated final HIV and all-cause mortality estimates. The groups were as follows:

- Group 1 includes countries with HIV prevalence data from antenatal clinics or nationally- or subnationally-representative population-based seroprevalence surveys:
  - Group 1A included countries with a peak of at least 0.5% prevalence.
  - Group 1B includes countries with a peak of at least 0.25% prevalence and vital registration completeness less than 65%.
- Group 2A: locations with high-quality (4 or 5 star) VR systems, based on the GBD VR quality rating system.<sup>32</sup> All-cause mortality estimates in these locations used national data such as the VR system.
- Group 2B: locations with lower-quality VR systems.
- Group 2C: locations without any VR data.

For HIV-specific mortality estimates, Group 1A and 1B locations used Spectrum output, Group 2A and 2B locations used mortality output straight from the ST-GPR process, and Group 2C locations used output cohort incidence bias adjusted (CIBA) deaths caused by HIV/AIDS from the Spectrum model.<sup>33</sup>

The outputs from the model included the under-1 age group but not early-, late-, and post-neonatal age groups. We assumed that all HIV deaths that occurred in the first year of life occurred in the post-neonatal stage. Previous research is limited but suggests higher mortality in the post-neonatal stage.<sup>16,17</sup> There was no definitive guidance on how better to age-split under-1 HIV deaths.

Finally, reckoned HIV-specific mortality is determined differently by age and modelling group. For the under-5 age groups, we conducted a separate calculation using results from the under-5 age-sex process described in section 2.2.14. For Group 1A and 1B locations, we produced a scalar from HIV-specific and non-HIV deaths Spectrum results, which we then used to produce an HIV-deleted mortality envelope from the all-cause envelope. For locations in other groups, we capped HIV mortality, which was taken directly from ST-GPR or Spectrum, at 90% of the all-cause envelope, and then subtracted it from the all-cause envelope to produce an HIV-deleted envelope. We assumed that all under-1 HIV-specific deaths happened in the post-neonatal stage.

For all locations in groups other than Group 1A, we followed the same procedure described above and capped HIV mortality for ages 6-14, which was taken directly from ST-GPR or Spectrum, at 90% of the all-cause envelope, and then subtracted it from the all-cause envelope to produce an HIV-deleted envelope for that age group. For Group 1A locations, we added HIV mortality from Spectrum to the HIV-free mortality taken directly from our estimates to produce the all-cause with-HIV envelope.

For the age groups older than 15, we used one approach for Group 1A and 1B locations and another approach for Group 2A, 2B, and 2C locations. For Group 1A and 1B locations, we used HIV mortality estimated from an ensemble model. For this, we calculated the average of the implied HIV mortality from the model life table process and HIV mortality from Spectrum, which were related to one another through the age pattern of draw-level HIV-free mortality. For Group 2A, 2B, and 2C locations, we used HIV mortality taken directly from ST-GPR and CIBA-Spectrum. For all locations in groups other than Group 1A, we subtracted HIV mortality, calculated using one of the approaches just described, from the all-cause envelope to produce HIV-deleted envelope deaths. For Group 1A locations, we instead added HIV mortality, again calculated using the approach just described, to the HIV-free mortality that had been estimated through the model life table process, which produced all-cause mortality. This process allowed us to adjust all-cause mortality based on ensemble HIV estimates in



Group 1A locations and was a response to the inherent uncertainty in all-cause mortality estimates that are based primarily on sibling survival data (as was the case in Group 1A locations) and the assumptions about mortality and data that are necessary in EPP and Spectrum.

### **Section 2.5.5: Envelope calculation**

We produced the all-cause and without-HIV envelopes by combining the results from the with-HIV and HIV-free life tables with HIV-specific mortality from ST-GPR, Spectrum output, or CIBA-Spectrum output. We determined the implied HIV mortality from the model life table system.

For the 95+ age group, we approximated the over-95 all-cause mortality rate by using our life table output and dividing  $l_x$  by  $T_x$  from the 95-99 age group values in the country-specific life tables ( $T_x$  is the life table parameter from the total person-years lived after age  $x$ ). We also calculated the 95+ all-cause mortality rate using the envelope deaths/populations. Next, we developed a scalar from the approximated 95+ all-cause mortality to the 95+ all-cause mortality rate. We rescaled the with-HIV and HIV-free life tables and the implied HIV mortality rate to death counts space using this scalar. Finally, we calculated HIV-deleted and all-cause mortality using the approach described for other age groups above 15 years old.

### **Section 2.5.6: Life table calculation**

For the most part, we calculated life tables using the same approach as for calculating the envelope. There were, however, several differences in the calculation that were related to sex and location aggregation.

For all locations in groups other than Group 1A, we divided the all-cause life table results by the ratio of HIV-free mortality to with-HIV mortality to get HIV-free life table results. For Group 1A locations, we instead multiplied the HIV-free life table results by the same ratio to get all-cause life table results. This process aligned with how we produced envelopes for different location groups.

For aggregate locations (ie, regions, super-regions, and global), we produced aggregate  ${}_n m_x$  and  ${}_n a_x$  (defined as the average number of years lived in the age interval, from among those who died in that age interval) by weighting  ${}_n m_x$  by population and  ${}_n a_x$  by deaths:

$${}_n m_x \times \text{population}$$

We used these death- and population-weighted  ${}_n m_x$  and  ${}_n a_x$  values to produce life tables at the regional level.

We calculated the life tables for the under-5 age groups using a similar approach. We did, however, use national-level under-5 results instead of the aggregated  ${}_n m_x$  and  ${}_n a_x$  values when calculating the all-cause life table for countries with subnational locations. We used this approach to preserve the under-5 mortality estimates produced through the processes described above. We did this because those estimates were not always the same as the estimates produced by the aggregated  ${}_n m_x$  and  ${}_n a_x$  values from the model life table process. We used the standard weights for HIV-deleted life tables to aggregate subnational units.

## **Section 2.6: Age-specific mortality estimation for all GBD age groups: with and without HIV<sup>7</sup>**

### **Section 2.6.1: HIV-deleted age-specific mortality**

We used HIV-deleted age-specific mortality in our causes of death (COD) analyses to prevent the spillover effect of HIV mortality into other causes, which was a potential problem especially in locations with a high HIV burden. We calculated this as the difference between the HIV-specific mortality from the HIV reckoning process (section 2.5.4) and the with-HIV age-specific mortality without fatal discontinuities (section 2.6.3).

### **Section 2.6.2: Age-specific mortality without discontinuities (with HIV/AIDS)**

We produced age-specific mortality rates without fatal discontinuities using the model life table system (section 2.4), the age-sex model (section 2.2.11), and the HIV reckoning process (section 2.5.4), with some methods specific to certain location groups.

For all locations, we used our age-sex model, which split U5MR into early mortality for the neonatal (enn), late neonatal (lnn), post neonatal (pnn), 12-23 months, and 2-4 years age groups, to calculate under-5 age-specific with-HIV mortality. For the age groups over 5 years, we used the GBD model life table system to calculate age-specific with-HIV mortality for

locations not in Group 1A. For Group 1A locations, we instead calculated age-specific with-HIV mortality as the sum of the HIV-specific mortality calculated in the ensemble model (section 2.5) and the HIV-free mortality calculated in the first step of the model life table system (section 2.4).

### **Section 2.6.3: Add fatal discontinuities**

We excluded data from years with fatal discontinuities from our mortality estimation process because we did not want sudden and temporary jumps in mortality to distort long-term mortality trends in that country or territory. The following section explains how we added deaths caused by fatal discontinuities to the all-cause mortality envelope and life tables. Section 2.7 provides more information about how we estimated the fatal discontinuities mortality.

To add fatal discontinuities to the life tables, we first produced full single-year with-HIV life tables, to which the fatal discontinuity death rates would later be added. In addition to the single-year death rates, early neonatal, late neonatal, and post-neonatal age groups from the under-5 age and sex model estimates were appended to the life tables. The fatal discontinuity death rates come from 1000 draws of deaths due to fatal discontinuities, transformed by our estimates of population. We then calculated fatal discontinuity mortality rates for each single-year age by assuming the same mortality rate for each year in an age group. This preserved the original abridged fatal discontinuity deaths. We then added the 1000 draws of fatal discontinuity mortality rates to the 1000 draws of with-HIV mortality rates in the full life tables for each location, sex, and age group, creating full life tables that had both fatal discontinuities and HIV included. These full life tables were then abridged into the standard age groups produced throughout the GBD. We calculated 95% UIs in the same way as for other estimates, using the 2.5% and 97.5% percentiles of the summed draws.

In GBD 2021, we adapted our process to preserve the mortality rate from fatal discontinuities when integrated into the abridged life tables. Previously, there would often be minor discrepancies between the increase in all-cause mortality and the mortality rate of fatal discontinuities. In cases where all-cause  $nq_x$  would be greater than 1 if fatal discontinuities were added, we lowered the all-cause mortality rate by a corresponding amount to prevent this from happening.

### **Section 2.6.4: Ages-specific deaths with discontinuities and HIV/AIDS**

We used the results from section 2.6.3 to produce location-sex-year-age-specific mortality numbers that included fatal discontinuities (appendix 2 figure S7).

### **Section 2.6.5: Life tables with HIV/AIDS and fatal discontinuities**

We used the results from section 2.6.4 to produce location-sex-year-specific  ${}_5q_0$ ,  ${}_{45}q_{15}$ , and life expectancy at birth estimates (appendix 2 tables S2–S4).

## Section 2.7: Fatal discontinuities<sup>7</sup>

Figure B

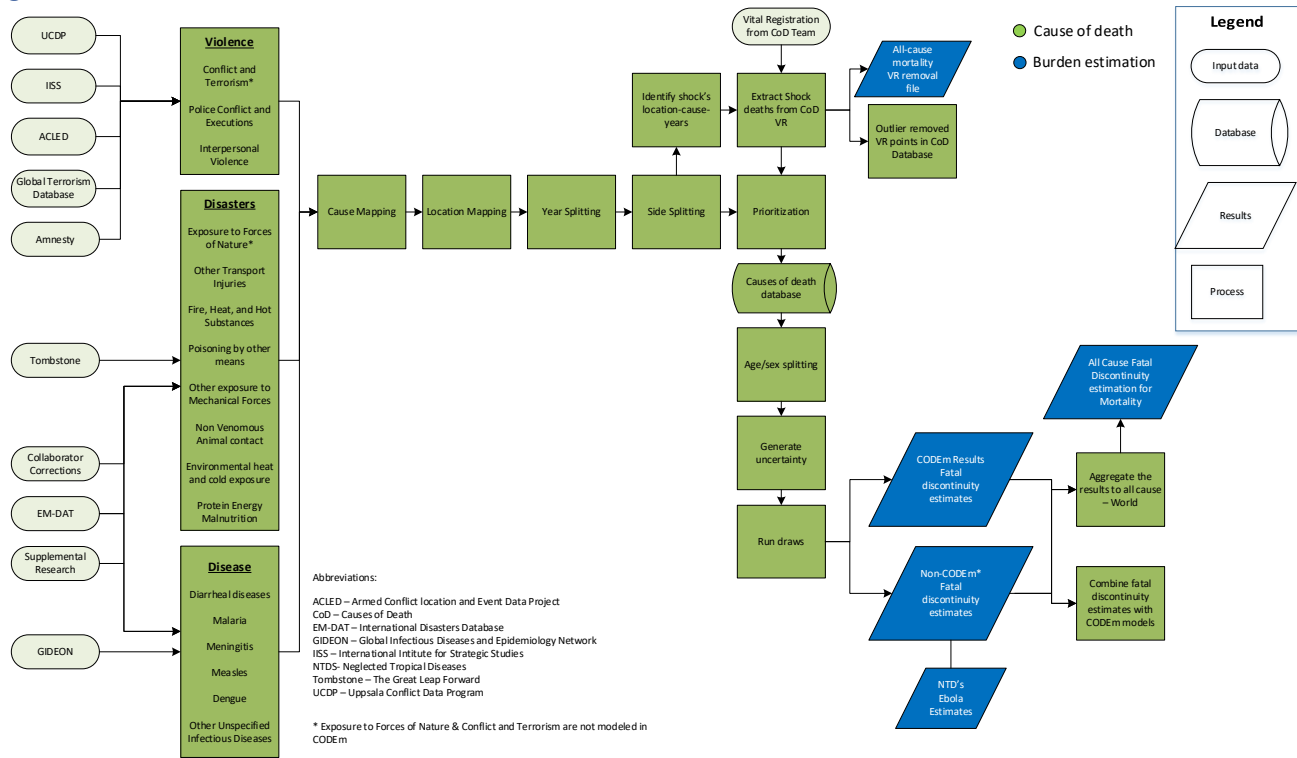

Fatal discontinuities are defined as events that are stochastic in nature and cannot be modelled because they do not have a predictable time trend. Some causes have both fatal discontinuities as well as a continuous background mortality that has a smooth time trend and can be modelled. These include police violence and executions; interpersonal violence; other transport injuries; fire, heat, and hot substances; poisoning by other means; other exposure to mechanical forces; non-venomous animal contact; environmental heat and cold exposure; protein-energy malnutrition; diarrhoeal disease; malaria; meningitis; measles; dengue; and other unspecified infectious diseases. Causes without a continuous background mortality that are exclusively estimated using the fatal discontinuity method are conflict and terrorism and exposure to forces of nature. Any other causes are not captured in fatal discontinuities.

### Section 2.7.1: Input data

#### Overall

We collected data on fatal discontinuities from a range of sources, namely from country-level VR systems and international databases that reported several cause-specific fatal discontinuities. We also collected supplemental data that have known issues related to quality, representativeness, or time lags in reporting. We used a Twitter scraper in place of a systematic literature review as a way to identify supplemental input data for missing fatal discontinuities. We describe the different fatal discontinuity data sources, presented by fatal discontinuity sub-cause, below.

#### Discontinuities only (non-CODEm)

For causes not modelled in the Cause of Death Ensemble model (CODEm), all deaths captured in VR were considered to be fatal discontinuities. Deaths that were extracted from cause-specific VR were then subtracted from the all-cause VR data used in the all-cause mortality estimation process.

#### Conflict and terrorism

In GBD 2021, war is defined as “a state of armed conflict between states, governments, societies, and paramilitary groups.” It is “generally characterised by extreme violence, aggression, destruction, and mortality, and the use of regular or irregular military forces.” Terrorism is defined as “the unlawful use or threatened use of force or violence against individuals or

property in an attempt to coerce or intimidate governments or societies to achieve political, religious, or ideological objectives.” We used conflict and terrorism data from the Uppsala Conflict Data Program (UCDP), International Institute for Strategic Studies (IISS), Armed Conflict Location & Event Data Project (ACLED), Global Terrorism Database (GTD), and VR systems and other supplemental data sources (table E). A case was assigned for each event using the source’s cause coding and any description from available notes.

Table E. Conflict and terrorism data sources

| Data source name                                                      | Date accessed | Years of data downloaded | Type of data included                                                                                                                                                                                                                                                |
|-----------------------------------------------------------------------|---------------|--------------------------|----------------------------------------------------------------------------------------------------------------------------------------------------------------------------------------------------------------------------------------------------------------------|
| <b>Uppsala Conflict Data Program<sup>34</sup></b>                     |               |                          |                                                                                                                                                                                                                                                                      |
| Georeferenced Event Dataset, Version 19.1                             | 8/11/2021     | 1989-2021                | UCDP battles, non-state, and one-sided conflict deaths with the most disaggregated location information available                                                                                                                                                    |
| PRIO Battles Deaths Dataset, Version 3.1                              | 4/7/2020      | 1946-2008                | Armed conflict (civil wars, etc.)                                                                                                                                                                                                                                    |
| <b>International Institute for Strategic Studies</b>                  |               |                          |                                                                                                                                                                                                                                                                      |
| Armed Conflict Dataset                                                | 11/17/2016    | 1997-2016                | Insurgency, Inter-state, Intra-state conflict deaths                                                                                                                                                                                                                 |
| <b>Robert S. Strauss Center for International Security and Law</b>    |               |                          |                                                                                                                                                                                                                                                                      |
| Armed Conflict Location and Event Dataset (ACLED)                     | 8/10/2022     | 1997-2021                | Actions of opposition groups, governments, and militias in selected locations in Africa, Asia, and the Middle East specifying the exact location and date of battle events, transfers of military control, headquarter establishment, civilian violence, and rioting |
| <b>University of Maryland, Global Terrorism Database</b>              |               |                          |                                                                                                                                                                                                                                                                      |
| Global Terrorism Database (GTD)                                       | 2/27/2020     | 1970-2018                | Attacks aimed at attaining political, economic, religious, or social goal, includes evidence of intention to coerce, action was outside precepts of International Humanitarian Law                                                                                   |
| <b>University of Chicago, Chicago Project on Security and Threats</b> |               |                          |                                                                                                                                                                                                                                                                      |
| Suicide Attack Database (CPOST SAD)                                   | 11/26/2017    | 1982-2016                | Attacks in which an attacker kills him/herself in a deliberate attempt to kill others, includes only attacks perpetrated by non-state actors                                                                                                                         |
| <b>Amnesty International</b>                                          |               |                          |                                                                                                                                                                                                                                                                      |
| Amnesty                                                               | 7/20/2020     | 1991-2019                | Police conflict and executions                                                                                                                                                                                                                                       |

Four major conflicts were identified that were not represented in these databases: genocide in Bangladesh in 1971,<sup>35</sup> genocide in Burundi in 1972 and 1993<sup>36</sup>, and civil conflict in Albania in 1997<sup>37</sup>. In these cases, literature sources were used to account for these fatal discontinuities.

#### Exposure to forces of nature

In GBD 2021, exposure to forces of nature is defined as “a force that is beyond human control.” The Centre for Research on the Epidemiology of Disasters’ International Disaster Database (EM-DAT)<sup>38</sup> served as the primary non-VR source of fatal discontinuities due to exposure to forces of nature (ie, natural disasters, lightning, earthquakes, volcanic eruptions, avalanches, storms, and floods). Data from EM-DAT were last accessed August 8, 2021. Supplemental online research was conducted for events where EM-DAT and VR were not up-to-date.

#### Partial discontinuity (CODEm)

For causes modelled in CODEm with fatal discontinuities obscured in the time trend, a process was established to avoid duplication of fatal discontinuity deaths in CODEm and the fatal discontinuity estimates. First, location-cause-years were identified through outside non-VR sources. If these location-cause-years also had VR death estimates that were greater than the average of the immediate surrounding years, the difference between the identified year and the average of the

surrounding years was included in the relevant cause for the fatal discontinuities database. The extracted deaths for all fatal discontinuity causes from VR were then subtracted from the all-cause VR data used in the all-cause mortality estimation process.

#### Executions and police conflict

In GBD 2021, executions and police conflict are defined as “the lawful use or threatened use of force or violence against individuals or groups of people or property in an attempt to achieve political or socioeconomic objectives for a state.” Data for executions and police conflict came primarily from Amnesty International, but other sources such as UCDP, ACLED, and VR that reported deaths due to legal intervention were also cause-mapped to executions and police conflict.

#### Homicide

In GBD 2021, homicide is defined as “the use of violence against an individual or group of people in an attempt to achieve non-political, religious, or ideological objectives.” Data for homicide came from VR, IISS, GED, ACLED, and other supplements. Events were mapped to homicide where the notes found in the raw data indicated gang violence. Deaths from IISS, GED, and ACLED were then split among three homicide sub-types; physical violence by firearms, physical violence by sharp object, and physical violence by other means, based on the rates calculated from VR by country and territory if available, and by region if country VR was unavailable.

#### Protein-energy malnutrition (PEM)

In GBD 2021, protein-energy malnutrition is defined as “a lack of dietary protein and/or energy” and covers famines as well as severe droughts. The primary source for PEM data, other than VR, was EM-DAT. The Tombstone report was used to estimate deaths attributed to the famine during the Great Leap Forward in China in the 1960s.<sup>39</sup>

#### Other injury causes

Other injury causes include other transport injuries (eg, plane, train, and boat accidents); poisonings; fire, heat, and hot substances; and other exposure to mechanical forces (eg, building collapse). The primary data source for these events other than VR was EM-DAT. Supplemental online research was conducted for events where EM-DAT and VR were not up to date.

#### Meningococcal meningitis and other diseases

In GBD 2021, fatal discontinuities due to a subset of infectious diseases were estimated, including meningococcal meningitis (or meningococcal infection), diarrhoeal disease caused by cholera and dengue. These infectious diseases were first included on the fatal discontinuity cause list for GBD 2016 because (1) their current modelling strategies in CODEm did not optimally capture the potentially highly variable—or epidemic—mortality levels and trends characteristic of these causes; and (2) they can contribute to significant total fatalities in a given location-year. Other infectious diseases for which the latter is true—high death rates in the presence of an outbreak or epidemic—are currently modelled with alternative cause of death methods (eg, natural history models for measles and yellow fever), which allow for greater variation year-over-year if or when outbreaks occur.

The Global Infectious Diseases and Epidemiology Network (GIDEON) and EM-DAT served as the primary data sources for collating cholera and meningococcal meningitis or meningococcal infection death reports.<sup>40,41</sup> For any year that cholera or meningococcal meningitis deaths were recorded in a country or territory covered by GBD, reported deaths were directly extracted from 1950 to 2021. If GIDEON or EMDAT had reporting gaps in cholera or meningococcal meningitis deaths, and WHO reports had coverage for those years, the WHO reports were used. For the Yemen Cholera outbreak in 2016 and 2017, estimates from local collaborators were used in the absence of other data sources.

### Section 2.7.2: Location mapping

Every event in the fatal discontinuities database was mapped to a GBD location using a four-step process that includes the following steps in succession: (1) manual mapping, (2) string matching, (3) GPS overlay, and (4) geocoding. If an event was manually mapped, the location was assigned without the use of any other map types. In manual mapping, events are manually assigned to locations by matching the location provided in the raw data to a GBD location. During string matching, an event’s location strings were directly compared to the GBD ASCII location names. During GPS overlay, events that have GPS coordinates provided were overlaid onto a map of GBD locations. If the event was placed over a GBD most-detailed location, the event was assigned to that location. During geocoding, the event’s location string was entered into Open Street Maps, which returns GPS coordinates. These coordinates were processed using GPS overlay to return GBD locations. This

hierarchy provides results where the results of manual mappings are considered the most reliable, followed successively by string matching, GPS coordinates, and then geocoding.

### Section 2.7.3: Side splitting

Many fatal discontinuities, such as war, have deaths that are reported across multiple locations. In these instances, deaths were split between the population from both locations, unless estimates by side were provided. If the resulting locations were at the most detailed GBD location level, no further splitting was needed. If a location was not most detailed, the deaths were distributed among the child locations by population.

### Section 2.7.4: Prioritisation

Where multiple sources reported shock deaths for the same location-year-cause, a cause-specific prioritisation scheme was followed that reflected the available detail in the cause-specific datasets. For example, the Georeferenced Event Dataset from UCDP was prioritised above all other non-VR sources because it included detail on how deaths were distributed between multiple actors and locations in each conflict event. In most cases, VR from 4-star or 5-star locations was used where available. In some cases, VR from 4-star or 5-star locations was not chosen if there were well-known data quality issues or discrepancies in the cause of death data reporting related to a particular event (eg, supplemental death data for Louisiana were used for Hurricane Katrina because of established data reporting issues).

### Section 2.7.5: Age-sex splitting

We ran all compiled data through the causes of death age-sex splitting process, except in cases where we had substantial and reliable information about the age distribution of specific events with high mortality, such as United States mortality during the Vietnam war and Iran mortality during the Iran-Iraq conflict in the early 1980s.<sup>32</sup>

### Section 2.7.6: Assigning uncertainty and generating draws

#### *Uncertainty analysis*

We generated UIs for deaths caused by conflict and terrorism using UCDP high and low mortality estimates, except for deaths in Iraq from 2003 to 2016. During this time period, deaths due to conflict and terrorism were estimated using a combination of supplemental sources. We used death counts from the Iraq Body Count (IBC),<sup>42</sup> which had the lowest number of deaths from among the sources we found, as the lower bound of the UI from 2003 to 2016. We used estimates from the Iraq Mortality Study (IMS) by Hagopian and colleagues<sup>43</sup> from 2003 to 2006, the deadliest years of the war, to scale deaths to produce the upper UI limits using the formula below:

$$deaths_{GBD\ 2017,high} = deaths_{IBC} \cdot \left[ \frac{deaths_{IMS}}{deaths_{IBC}} \right]_{2003-2006}$$

GBD 2021 used the average ratio between IMS and IBC reported deaths between 2003 and 2006, multiplied by the number of deaths reported by the IBC. This high estimate was carried forward through 2017 under the assumption that IBC similarly undercounts the number of deaths due to the ongoing civil war in Iraq. The final, best estimate for conflict and terrorism deaths in Iraq from 2003 to 2016 is the midpoint of the high and low estimates given above.

When high and low estimates were not included in the existing data, we applied the regional average UI to the available mortality estimate, for all fatal discontinuity causes.

We assumed a log-normal distribution using mean mortality rates and standard error based on high and low estimates. When the standard error was less than 10e-8, we set the draws equal to the mean rate. We then sampled 1000 draws from the log-normal distribution and converted the draws back to counts space. We used the count space draws to calculate final means and UIs.

### Section 2.7.7: Changes since GBD 2019

The only substantive methods change since GBD 2019 was the inclusion of COVID-19 as a shock model. The calculation of COVID-19 shocks is detailed in Section 2.8 below.



## Section 2.8: Accounting for the COVID-19 pandemic

### Section 2.8.1: Excess mortality due to the COVID-19 pandemic

We used the methodology described in a previous publication to estimate excess mortality due to the COVID-19 pandemic<sup>44</sup> with some key updates. Our analysis of excess mortality due to the COVID-19 pandemic from Jan 1, 2020, to Dec 31, 2021, followed four key steps. First, we developed a database of all-cause mortality by week and month after accounting for reporting lags, anomalies such as heat waves, and under-registration of death. Second, we developed an ensemble model to predict expected deaths in the absence of the COVID-19 pandemic for years 2020 and 2021. In location and time combinations with data meeting our inclusion criteria, excess mortality was estimated as observed mortality minus expected mortality. Third, to estimate excess mortality due to COVID-19 over the entire study period for all countries and territories in the analysis, and especially for locations without weekly or monthly all-cause mortality data, we developed a statistical model to directly predict the excess mortality due to COVID-19, using covariates that pertained to both the COVID-19 pandemic and background population health-related metrics at the population level before SARS-CoV-2 emerged. Fourth, we estimated excess mortality due to COVID-19, propagating uncertainty from each step.

To estimate expected mortality, we developed six models, each fit separately by location. The first four models were based on first estimating the weekly (or monthly) seasonal pattern of mortality and then estimating the time trend in weekly or monthly mortality not explained by seasonality. We used a Bayesian spline to estimate the weekly seasonal pattern for each location using data from 2010, or the earliest year after 2010 when such data first became available, until around February 2020, when the COVID-19 pandemic started for each location. Second, using the same Bayesian spline, we estimated the time trend in the residuals. By combining the seasonal and secular trends, we generated predictions of the expected level of mortality in 2020 and 2021.

The specification of the spline can have a sizeable impact on the estimated expected mortality for a particular location. To make the results more robust to model specification, we included in our ensemble four variants according to where the second to last knot in the spline was placed: 6 months, 12 months, 18 months, and 24 months before the end of the period for the input data before the COVID-19 pandemic started for each location. We also included in the ensemble a Poisson model with fixed effects on week and year, and a model that assumed that expected mortality for 2020 and 2021 was the same as the corresponding weekly mortality observed in 2019. To derive weights for the different models in the ensemble, we assessed how each model performed in an out-of-sample predictive validity test. We fit the model to all data prior to March 1, 2019, and then evaluated how each model performed in predicting mortality between March 2019, and February 2020, compared with observed mortality in the same time period. We then weighted component models in the ensemble using 1 over the root mean squared error (RMSE) of the predictions for each component to down-weight component models with larger RMSE (and thus less accurate predictions) in the ensemble. A global weighting scheme was used for all locations. Expected mortality from the ensemble model was subtracted from observed mortality in 2020 and 2021 to estimate excess mortality due to the COVID-19 pandemic.

Based on our estimation of expected mortality, and after applying the exclusions that account for late registration and other anomalies as previously described, we generated excess mortality estimates for each location where we had input data. In addition, we added excess mortality estimates from two countries where the ensemble model could not be applied due to data constraints: South Africa (only the provinces) and India. We obtained national and province-level excess mortality rate estimates for South Africa which are regularly updated by the Medical Research Council of South Africa, and excess mortality estimates for select periods during the first and second waves of the COVID-19 epidemic for 12 states in India. Using these empirical excess mortality estimates, we developed a statistical model to predict excess mortality for all 191 national and 252 subnational locations in our analysis for the uniform period of Jan 1, 2020, to Dec 31, 2021. This model was crucial for directly estimating excess mortality in countries where reported all-cause mortality data have not been available during the pandemic.

Various studies have examined the associations between particular underlying medical conditions and increased risk of severe COVID-19. We examined all available and relevant covariates on the basis of a meta-analysis conducted by the US Centers for Disease Control and Prevention, as well as covariates directly related to the COVID-19 pandemic, including seroprevalence (lagged by 25 days), mobility (lagged by 19 days), infection detection ratio (IDR; lagged by 19 days), and reported crude death rate due to COVID-19. To help identify covariates that have sensible direction of effect on excess mortality rate, we used ROVER, a method developed at the Institute for Health Metrics and Evaluation based on Bayesian model averaging (BMA). ROVER is conceptually similar to the BMA method, which is widely used to explore the

parameter space and aggregate estimates across candidate models based on performance metrics.<sup>45</sup> The main difference is that while BMA uses marginal likelihood, ROVER focuses on out-of-sample performance. The implementation of ROVER used for this process can be found at <https://github.com/ihmeuw-msca/modrover>. Based on the outputs of ROVER, 11 covariates were included in our final log-linear model, where the dependent variable was excess mortality in logarithmic scale: lagged cumulative infection rate (seroprevalence) in log space, COVID-19 mortality rate in log space, crude death rate in log space, lagged IDR, annual inpatient admissions per capita, diabetes mortality rate in log space, HIV mortality rate in log space, , average absolute latitude, smoking prevalence, Health Access and Quality (HAQ) Index, and proportion of the population aged 75 years or older. To reduce model volatility, after fitting the initial model, data points with residuals in the top and bottom 2.5<sup>th</sup> percentiles were excluded and the model was refit. Altogether, these covariates explained 86.9% of the variation in the input data to this regression. We also calculated in-sample residuals for the locations that had directly observed excess mortality rates used in the regression (ie, India and South Africa). Regional and super-regional residuals, per the GBD regional classification system, were calculated as the mean residuals from locations included in each regional aggregate. We also calculated a country-level residual for India using the residual from the 12 states to recognise the dispersed periods and geographical regions covered by the civil registration data. To validate our modelling process, we conducted out-of-sample predictive validity testing. Given the sparsity of input data on empirical excess mortality, we validated our model by repeatedly leaving one location out of the input data, then re-estimated the model and made predictions for the left-out location. Our analysis showed that the mean relative error of predicted excess mortality rate is 10.2% and the root mean squared error of predicted excess mortality rate is 0.00066, indicating a precise prediction model that has low bias.

With this model, we predicted estimates of excess mortality for the periods of 2020, 2021, and the combined time period of Jan 1, 2020 to Dec 21, 2021. Given the broader availability of data covering the entire time period, the yearly estimates were scaled to the entire time period for locations without direct estimates of excess mortality from the first stage model. Ratios of estimated excess mortality to reported COVID-19 deaths were computed using the modelled excess mortality and the reported COVID-19 counts for each location.

As noted previously, policy makers and researchers have proposed many other causes of death that might have been affected by lockdown restrictions, unemployment, and increased poverty. To date, insufficient data are available to widely test for increases in deaths due to pandemic-related elements, such as deferred care, or for reductions in deaths, such as decreases in injury-related deaths due to reduced mobility.

### **Section 2.8.2: Excess mortality age-sex splitting**

In order to reconcile all-ages, all-sexes excess mortality estimates with age-sex-specific all-cause mortality estimates, age-sex distributions of excess mortality were created to split the aggregate estimate. Distributions of excess were calculated by taking the difference between two all-cause envelope versions for location with VR in 2020-2021: 1) an envelope with pandemic years VR data, 2) a counterfactual envelope without pandemic years VR data. The difference between these envelope versions was the implied excess mortality and provided age- and sex-specific rates of excess. Beyond location-specific distributions of excess mortality, global distributions of positive and negative excess were created by summing the implied excess of all countries with positive and negative excess, respectively. The global positive distribution was calculated separately for 2020 and 2021 while the global negative distribution was calculated using all location-years with implied negative excess.

These distributions of excess were applied to the total COVID-19 excess mortality values and scaled such that the total excess mortality was conserved, and the implied under-5 excess remained constant. Location-years with VR largely used a location-year-specific age-sex distribution while locations without VR used either the positive or negative global distribution of excess depending on the value of excess mortality. Location-years for 2021 could also use the distribution from 2020 if VR was present in 2020, but not 2021. Other locations with VR could also be forced to use the global distribution if estimated excess mortality was below a threshold (50 000) or if the implied distribution was implausible or differed in sign from the estimated total excess mortality. All subnational locations used the same age-sex distribution as their parent locations if the sign agreed, or the corresponding global distribution if it did not.



### Section 2.8.3: Balancing equation

The balancing equation formally reconciled deaths associated with COVID-19 excess mortality and cause-specific pandemic related causes. This was done by creating a measure of other pandemic related mortality (OPRM) which is equal to the difference between excess mortality and the sum of COVID-19 specific deaths, measles, lower respiratory infection (LRI), and pertussis. Measles, LRI, and pertussis were referred to as indirect COVID causes as mortality from these diseases was affected by the pandemic. OPRM captures all deaths due to the pandemic which were not specifically caused by COVID-19 or the indirect COVID causes. It can be positive or negative, though as we assert that GBD level 1 causes cannot be negative, negative OPRM is removed in the next process.

### Section 2.8.4: COVID-19 excess mortality harmonisation

To create consensus between COVID-19-specific mortality, other pandemic related mortality, and all-cause mortality, we reconciled the difference between estimated and implied excess mortality, using estimates from the model life table system. First, any negative OPRM was added to the all-cause envelope and set to zero. For locations with VR data in either 2020 or 2021, the difference between implied and separately estimated excess mortality was split between the all-cause envelope, COVID-19 deaths, and other pandemic related causes. Steps were taken such that values were positive and that final COVID-19 deaths were never less than the reported COVID-19 deaths from each location. Additionally, we adjusted mortality for locations which had VR data in 2020, but not 2021, by multiplying the envelope by the ratio of the adjusted envelope in 2020 over the unadjusted envelope. Locations with no VR in either 2020 or 2021 instead use a ratio of expected deaths from the COVID EM estimation pipeline and the estimate from model life tables. This, in addition to distributing negative OPRM among the all-cause envelope and COVID mortality, allows us to have consistency between our with and without pandemic data mortality results, COVID mortality estimation, and COVID excess mortality estimation. Subnational estimates for all three indicators were scaled to the national level. After COVID-19 deaths, OPRM, indirect COVID shocks, and expected non-pandemic mortality were recalculated, we treated the results as outputs from our model life table system (section 2.4) and performed shocks addition and envelope finalization steps to attain final results. Details from these steps can be found in sections 2.5–2.7.

## Section 3: Fertility<sup>4,5,7</sup>

### Section 3.1: Overview

Prior to GBD 2016, we used United Nations World Population Prospects fertility estimates for all countries and territories.<sup>46</sup> Starting with GBD 2016, we estimated fertility rates within the GBD framework. We based our estimate of total fertility rate (TFR) on a systematic synthesis of all data available for all GBD 2016 locations, using the age-specific fertility pattern from World Population Prospects (WPP).<sup>3</sup> Starting in GBD 2017, we estimated age-specific fertility rates (ASFRs) for ages 10 to 54 years based on a systematic synthesis of all available data for all GBD locations. We calculated TFR as a function of the ASFRs.<sup>5</sup> We compiled a total of 58 072 unique location-source-years of data for females aged 10 to 54 for the period between 1950 and 2021. Appendix table S11 and appendix table S12 depict the number of sources by location and by year.

### Section 3.2.1: Fertility data source types

We sought to use accurate and complete accounts of livebirths reported according to the age of mothers. Complete livebirth registration reports are designed to account for all births in a single country, territory, or subnational location in a single year, which makes them the gold standard for fertility data. Most high-income countries and territories maintain high-quality VR systems with information on dates and locations for all births as well as demographic characteristics of each mother. Many lower-income countries and territories, however, rely on birth registries with incomplete data coverage or interrupted and/or delayed reporting. In these locations, we used household surveys with birth history information for women aged 15 to 49 at the time of the survey, but had to use birth registries for females aged 10 to 14 and 50 to 54 since most household surveys do not collect birth histories from those age groups.

For triangulating the level and age-pattern of fertility, we had to rely on other types of data sources, primarily household surveys and censuses in areas, where birth registration data quality and completeness were low. Household surveys and censuses contained two primary types of fertility information: CBHs and SBHs. See section 2.2.1 for more information about CBHs and SBHs.

### Section 3.2.2: Fertility data identification and synthesis

We obtained VR data from the UN Demographic Yearbook (DYB) from the UN Statistics Division (UNSD),<sup>47</sup> the Human Fertility Collection (HFC) and Human Fertility Database (HFD) from the Max Planck Institute for Demographic Research

(MPIDR),<sup>48,49</sup> the WHO mortality database,<sup>50</sup> official publications, online data portals of national statistical offices, and international collaborators. The HFC, HFD, and DYB are compilations of registry-based fertility data from national statistical offices and research institutes. We obtained DYB data on live births by age of mother for every year available from 1950 to 2020. We obtained the complete set of age-specific empirical data from HFC up to 2019 and from HFD up to 2021 but excluded country-year-ages already accounted for by the DYB. In addition to DYB, HFC, and HFD data, we obtained data from SRSs where available, primarily in South Asian countries such as India, Pakistan, and Bangladesh. In total, at the national level, we obtained 8680 unique country-source-years of VR data, with 2441 from before 1970 and 2554 from after 2000. We also had 29 country-source-years of data from SRS.

We identified fertility data from censuses and household surveys using the Global Health Data Exchange (ger) by searching for “complete birth history,” “summary birth history,” and “fertility” from among the records categorised as “survey” and “census.” Research team members reviewed these data to verify whether they included the necessary information for GBD analysis. We then conducted additional research to identify and fill gaps in data, primarily by data seeking on country statistical office websites and seeking recently released surveys such as DHS, MICS, WFS, and Reproductive Health Surveys (RHS). In-country collaborators also assisted in acquiring data that were not publicly available. For low-income locations (especially in sub-Saharan Africa), we sought out colonial censuses from the 1950s and 1960s with SBH data. For sources that contained microdata, we computed period ASFRs every three years over a 15-year recall using CBH data and calculated the average number of children ever born (CEB) for each year of mother’s age, which we later split by cohort age patterns from the first modelling stage (see section 3.3.5), using SBH data. For sources that did not contain microdata, we extracted period ASFR or average CEB by mother’s age from reports or other publications. In total, we used 735 CBH and 879 SBH sources from surveys and censuses. We were occasionally unable to identify whether a survey that contained tabulated period ASFRs was a CBH or SBH survey, but these data only accounted for 150 country-source-years from 28 sources. We have provided details on the nature and quantity of identified data sources in appendix tables S11 and S12. We then estimated fertility rates for the 10–14-year age group as a function of estimated fertility in the 15–19-year age group and for the 50–54-year age group as a function of the estimated fertility in the 45–49-year group. We provide more information about the age-specific fertility estimation process below. After estimating ASFRs, we computed summary measures of fertility including TFR, total fertility under age 25 (TFU25), and total fertility over age 30 (TFO30).

### Section 3.3.2: Age-specific fertility rate estimation for 15 to 49 years

As stated above, we used ST-GPR to estimate ASFR for age groups 15–19, 20–24, 25–29, 30–34, 35–39, 40–44, and 45–49. The methods for this process have been described in full elsewhere,<sup>7</sup> but in short, we did the following:

(1) estimated ASFR for the 20–24 age group using age-specific data from CBH and VR sources, using mean years of education in that age group as a covariate; (2) estimated ASFR for the other age groups using age-specific data from CBH and VR sources as well as age-specific mean years of education and the 20–24 age group ASFR; (3) split SBH and other total births data by age and period using estimated location, time, and ASFR for each age group; (4) re-estimated ASFR for the 20–24 age group using CBH, VR, and period-age-split SBH data; and (5) re-estimated ASFR for the other age groups using CBH, VR, and the period-age-split SBH data.

We implemented the ST-GPR models for ASFR as explained below. The first stage of our mixed effect regression was fit in bounded logit space:

$$\text{Logit} \left( \frac{\text{ASFR data} - \text{lower bound}_{age}}{\text{upper bound}_{age} - \text{lower bound}_{age}} \right)$$

We set the lower bound as the minimum fertility by age across time and location and the upper bound, after dropping implausibly high ASFRs over 0.5, as the 99.3 percentile of fertility by age across time and location. The upper bound set an implied maximum TFR of 9.35.

We used the following formula for our mixed effects regression:

$$\begin{aligned} \text{logit}_{\text{bound}}(\text{ASFR}_{20-24})_{c,t,s,i} &= \beta_0 + \beta_1 * \text{female education}_{c,t} + \gamma_{cs} + \varepsilon_{c,t,s,i} \\ \text{logit}_{\text{bound}}(\text{ASFR}_{n-n+4})_{c,t,s,i} &= \beta_0 + \beta_1 * \text{fem edu}_{c,t} + \text{spline}(\text{ASFR}_{20-24,c,t}) + \gamma_{cs} + \varepsilon_{c,t,s,i} \\ \gamma_{cs} &\sim N(0, \sigma_{\gamma_{cs}}^2) \\ \varepsilon_{c,t,s,i} &\sim N(0, \sigma_{\varepsilon}^2) \end{aligned}$$

Where

$c$  is location,  $t$  is time,  $s$  is source of datapoint  $i$

$n$  is between 15 and 45

$\beta_0$  is the intercept

$\beta_1$  is the coefficient on female education

$\gamma_{cs}$  is a location-source random intercept

$\varepsilon$  is the residual

Female education and the 20-24 age group ASFR estimates were specific to each country or territory and year.

We only used female education as a covariate in high-income locations for the 20-24 age group, not for the other age groups. We fit separate models for the high-income, sub-Saharan Africa, central Europe, eastern Europe, and central Asia super-regions to factor in the differences in the relationships between the 20-24 age group ASFR and the ASFR of other age groups. We selected the knots in the linear spline (in logit space) by super-region and age group, as outlined in table F below.

Table F. Knots on ASFR 20–24

| Region                                           | Age | Knot  |
|--------------------------------------------------|-----|-------|
| Central Europe, eastern Europe, and central Asia | 15  | NA    |
| Central Europe, eastern Europe, and central Asia | 25  | -1.5  |
| Central Europe, eastern Europe, and central Asia | 30  | -2    |
| Central Europe, eastern Europe, and central Asia | 35  | -1.75 |
| Central Europe, eastern Europe, and central Asia | 40  | -1.75 |
| Central Europe, eastern Europe, and central Asia | 45  | -2    |
| High-income                                      | 15  | NA    |
| High-income                                      | 25  | NA    |
| High-income                                      | 30  | -2.25 |
| High-income                                      | 35  | -2    |
| High-income                                      | 40  | -2.25 |
| High-income                                      | 45  | -2.25 |
| Others                                           | 15  | NA    |
| Others                                           | 25  | -1.5  |
| Others                                           | 30  | -1.3  |
| Others                                           | 35  | -1.3  |
| Others                                           | 40  | -2    |
| Others                                           | 45  | -2.5  |

|                    |    |       |
|--------------------|----|-------|
| Sub-Saharan Africa | 15 | NA    |
| Sub-Saharan Africa | 25 | -1.75 |
| Sub-Saharan Africa | 30 | -1.25 |
| Sub-Saharan Africa | 35 | -1.3  |
| Sub-Saharan Africa | 40 | -1.5  |
| Sub-Saharan Africa | 45 | -1.75 |

We outliered data that reported improbably high ASFR (ie, ASFR over 0.5); had 0 values as a result of sampling error, particularly in the 45–49-year age group; reflected an undercounting of births, when we could not adjust the data using other sources; or reported implausibly high mortality levels or trends compared to complete VR data or other more reliable sources.

### Section 3.3.3: Data source adjustment

After running the mixed effects model, we adjusted data to a reference source using the random intercept on the concatenation of location and source. To get the adjustment factor, we did the following using the equation below: (1) calculated the difference between the fixed and random effects of the reference source, (2) calculated the difference between the fixed and random effects of the datapoint for the specific source, (3) added the two differences together. We then added this adjustment factor to the data to get an adjusted value.

$$\text{Adjustment Factor} = (\text{Location Source } RE_{ref} - \text{Location Source } RE_{datapoint})$$

where  $RE$  represents a random intercept of either a reference source or a datapoint-specific location-source.

When we had more than one reference source for a single location, we averaged the values of the location source random effects from all the reference sources and used that for the *Location Source RE<sub>ref</sub>* part of the equation.

We primarily chose reference sources as those that met one of the following criteria: (1) complete VR for locations with complete VR, (2) an average of complete birth history sources for locations with one or more complete birth histories, and (3) an average of all the sources for each location for locations without complete VR or complete birth histories. We considered a location-year of VR to be complete if the estimated completeness of child death registrations was over 95% according to the previous round of GBD.<sup>7</sup> We also chose reference sources for some locations using expert judgement. For example, the 1950s and 1960s censuses in sub-Saharan Africa are widely viewed as an accurate reflection of depressed fertility in that region at that time, so we used those as reference sources.

### Section 3.3.4: Hyperparameter selection

We used the outputs of the previous processes to implement residual smoothing and GPR. We chose hyperparameters for these steps based on a location-age-specific data density score. We calculated data density scores based on the years for which VR sources were available plus the number of unique CBH and SBH sources available for the given location, using the following computational methods for each type of data source:

1. **Complete VR sources:** calculated as the number of years for which VR data were available. If the number of births in the age group was below 100, this part of the score was down-weighted by the ratio between the number of births and 100.
2. **Incomplete VR sources:** calculated the same way as with complete VR data, but down-weighted by 0.5.
3. **Total CBH sources:** the number of unique complete birth histories for a single location.
4. **Total SBH sources:** the number of unique summary birth histories for a single location.

We calculated the data density score using the following equation:

$$\begin{aligned} DD\ Score_{loc,age} = & \text{Complete VR years}_{loc,age} + (2 * \text{Number CBH Sources}_{loc,age}) \\ & + (0.25 * \text{Number SBH sources}_{loc,age}) + (0.5 * \text{Incomplete VR years}_{loc,age}) \\ & + \text{Number Other Sources}_{loc,age} \end{aligned}$$

Where

DD is the data density

CBH is complete birth history

SBH is summary birth history

In this round of GBD, we updated our time weights to use a beta density function. We assigned hyperparameters  $\alpha$  and  $\beta$  for the beta density function, generally based on final data densities, as shown in table G. However, there were exceptions where we manually assigned a different set of hyperparameters.

*Table G. Hyperparameter values by data density*

| Data density      | Alpha | Beta | Zeta | Scale |
|-------------------|-------|------|------|-------|
| Over 50           | 500   | 500  | 0.99 | 5     |
| Between 30 and 50 | 100   | 100  | 0.9  | 10    |
| Between 20 and 29 | 20    | 20   | 0.8  | 15    |
| Between 10 and 19 | 15    | 15   | 0.7  | 15    |
| Under 10          | 10    | 10   | 0.6  | 15    |

Where the time weights were calculated as:

$$w_t = \frac{\frac{\Gamma(\alpha + \beta)}{\Gamma(\alpha)\Gamma(\beta)} x^{\alpha-1}(1-x)^{\beta-1}}{\frac{\Gamma(\alpha + \beta)}{\Gamma(\alpha)\Gamma(\beta)} 0.5^{\alpha-1}(1-0.5)^{\beta-1}} = \frac{x^{\alpha-1}(1-x)^{\beta-1}}{0.5^{\alpha+\beta-2}}$$

And:

$$x = \frac{(t + 72)}{144}$$

In cases of incomplete VR sources, we defined data variance as the difference between the spatiotemporal prediction and the unadjusted data. Some location-ages had very little data, resulting in implausible variance. As such, for location-ages with fewer than five datapoints, we used the maximum data variance in the location's GBD region.

For complete VR sources, we assumed that non-sampling variance was 0. We calculated sampling variance for these sources using the following binomial equation:

$$Sampling\ Variance = \frac{ASFR * (1 - ASFR)}{Births}$$

We then calculated amplitude and applied it to all locations other than high-income VR-only national locations with 40+ years of VR data. For these locations, we took the mean of the location-specific variance of the difference between the data and the spatiotemporal smoothing. However, we only included national locations from 1990 to 2021.

### Section 3.3.5: SBH methods

For the earlier years of the study period, CEB data were more readily available from SBHs than from CBHs. While there are numerous methods for calculating period-age-specific fertility from SBH information, the Brass Parity/Fertility ratio method is used most often. However, this method assumes a constant ASFR over time. We wanted a dynamic measure of cohort age patterns over time, so we instead used ASFR estimates from CBH and VR data from the first run-through of ST-GPR described above to split SBH into period ASFR. We used these estimates to compute implied annualised fertility for all the five-year birth cohorts represented in a given SBH from age 10 through whichever came sooner: age 54 or the year of the survey. To account for births that occurred in years when part of the initial age group had moved into the next age group, we calculated the weighted average of estimated ASFRs in the age groups on either side of the selected age group and took that average as the fertility experienced by that hypothetical cohort in that year, assuming a uniform age distribution within the age group. For example, for a cohort of women aged 20 to 24 in 1984 with ASFR  $F$ , we would compute the ASFR experienced by this cohort as women aged 21 to 25 in 1985 as

$$.8 * {}_5F_{20}^{1984} + .2 * {}_5F_{25}^{1989}$$

since 20% of the cohort had aged into the 25 to 29 age group by the following year.

We then used the implied annualised cohort ASFR to calculate cumulative cohort fertility up to the age of each cohort at the time of the survey. We compared implied cumulative fertility to observed cumulative fertility (average CEB from SBHs) by each cohort to get a scaling factor. We then applied this scaling factor to the original implied cohort age pattern, which distributed CEB back across time and age. This method only covered birth cohorts between 1940 (who began to experience ASFR 10-14 in 1950, the first year of our study period) and 2009 (who began to experience ASFR 10-14 in 2019, at the end of our study period).

### *Splitting of total birth and historic location aggregate data*

A large portion of the data could only be obtained already aggregated by age and/or location (eg, total live births instead of births by mother's age; former USSR prior to its dissolution). For these data, we split just the CBH and VR data using the age and location proportions designated in the first ST-GPR run-through. After splitting the data, we reran the estimation process describe above using all CBH, VR, and period and age-split data as well as location and age-split miscellany. This improved the availability of past data and gave us more information about aggregate levels of fertility over time.

### Section 3.3.6: Age-specific fertility rate estimation for 10- to 14-year-olds and 50- to 54-year-olds

We estimated ASFR for the 10 to 14 and 50–54-year age groups separately because data for these age groups in locations without VR systems were scarce. We used the relationship between ASFR in sequential age groups to estimate both age groups. For the 10 to 14 age group, we ran a mixed effects regression on the log of the ratio of ASFR 10-14 over ASFR 15-19, and used ASFR 15-19 and nested random intercepts by super-region, region, and location as predictors, as defined by the equation below:

$$\log \left( \frac{ASFR_{10-14}}{ASFR_{15-19}} \right) = \beta_0 + \beta_1 \log(ASFR_{15-19}) + \gamma_{k[j]} + \gamma_{jk[i]} + \gamma_{ijk}$$

$$\gamma_{k[j]} \sim N(0, \sigma_{\gamma_{k[j]}}^2)$$

$$\gamma_{jk[i]} \sim N(0, \sigma_{\gamma_{jk[i]}}^2)$$

$$\gamma_{ijk} \sim N(0, \sigma_{\gamma_{ijk}}^2)$$

Where

$i$  is location,  $j$  is region,  $k$  is super-region

$\beta_i$  is a fixed covariate coefficient

$\gamma_{k[j]}$ ,  $\gamma_{jk[i]}$ , and  $\gamma_{ijk}$  are nested super-region, region, and location random intercepts

For ASFR in the 50 to 54 age group, we instead estimated a regression on the log ratio of ASFR 50–54 over ASFR 45–49 with a constant. We did this because there was not a clear relationship between this ratio and ASFR 45–49. We produced 1000 draws from the variance-covariance matrix to generate uncertainty using methods described previously.

### Section 3.3.7: Fertility metrics

We calculated TFR as the time-weighted sum of the ASFRs from each age group. To do this, we added ASFR for each five-year age group and multiplied that by the five years spent in each age group. We calculated TFU25 and TFO30 in the same way, but with only the relevant age groups included. We defined livebirths as the sum of ASFR from all age groups multiplied by the 10- to 54-year-old female population from the population model described in section 4.

## Section 3.4: Sex ratio at birth

### Section 3.4.1: Overview

Another component of population structures and reproductive capacity is the sex ratio at birth (SRB). For the GBD 2021 analysis, we defined SRB as the ratio of total male to total female livebirths in each location in a given calendar year. The naturally occurring SRB is generally approximately 1.05 males per female, with some location-specific variations.<sup>51</sup> Since the introduction of ultrasound technologies and the ability to conduct sex-selective abortions, previously stable SRBs have shifted in some locations as a result of systematic sex preferences for children.<sup>51</sup> SRBs in recent years are particularly skewed in the Caucasus, south Asia, and east Asia. To reflect historic equilibria and recent shifts in SRB, we developed a model to estimate SRB in all GBD countries and territories, Hong Kong, and Macau from 1950 to 2021.

### Section 3.4.2: Modelling approach

For GBD 2021, we updated our sex ratio at birth estimates. We implemented ST-GPR to estimate a complete time series of the sex ratio at birth for all GBD locations and years. The main differences from previous GBD rounds are additional VR and CBH data, updated outliering decisions following thorough model review, and the use of higher values of the beta hyperparameter for locations with more data. The beta hyperparameter change lowers the smoothness of the model fit, allowing the model to follow the data more closely. See the fertility section for more details on the methodology.

## Section 4: Population

### Section 4.1: Overview

To estimate population size over a period of time, it is necessary to estimate the initial population and how many people are entering and leaving the population through births, deaths, and migration. The demographic balancing equation expresses how population ( $N$ ) changes between two points in time.

$$N(T) = N(0) + B[0, T] - D[0, T] + I[0, T] - O[0, T]$$

People can only enter a population through birth (B) or immigration (I) and exit through death (D) or emigration (O). In this analysis, immigration and emigration are collapsed into net migration (G), where net immigration is indicated by a positive value and net emigration is indicated by a negative value.

$$N(T) = N(0) + B[0, T] - D[0, T] + G[0, T]$$



The Bayesian population model used in this study reconciles data on population size obtained through population censuses and registries with GBD fertility and mortality estimates. Below we describe each data source used as an input to the model and then we describe the modelling processes used to estimate migration and population. The calculated GBD world population standard is shown in appendix table S14.

## Section 4.2: Data sources and processing<sup>7</sup>

### Section 4.2.1: Census and registry lists

Population censuses, which are generally conducted in most countries every ten years, are the primary source of data for population size by age and sex. In some countries, continuous population registries are also maintained. We synthesised population census data by first compiling a list of censuses as documented by the United Nations Statistics Division (UNSD),<sup>52</sup> [United Nations Population Division](#) (UNPOP),<sup>53</sup> [United Nations Demographic Yearbook](#) (UN DYB),<sup>47</sup> the Integrated Public Use Microdata Series (IPUMS),<sup>54</sup> and the Population Research Center at The University of Texas at Austin.<sup>55</sup> All censuses and registries can be found for each country in appendix figure S5. In appendix table S13, a list of all confirmed censuses can be found.

### Section 4.2.2: Data extraction

We extracted age-sex-specific population census data and registry counts from the UN DYB,<sup>47</sup> IPUMS,<sup>54</sup> national statistic websites, and by searching the WorldCat catalog.<sup>56</sup> Occasionally, multiple sources of population counts for a given census or registry-year were available. In these instances, preference was given to registry data rather than census data, data where population counts were reported as de facto (when people are counted based on place of enumeration) over de jure (when people are counted based on place of usual residence), and data reporting population by more granular age and sex groups. In certain cases, only a portion of the total census population was reported with more granular detail for age and sex (with a sample ranging from 1% to 20% of the total census). In these instances, we assumed that the age and sex structure of the sub-sample was identical to that of the total census. Then, we scaled up the sub-sample counts using the total census population counts.

In total, data were extracted for 1277 censuses. Of the censuses extracted, 678 were de facto, 537 were de jure, and in 61 instances we were unable to determine whether the data were de facto or de jure. We were unable to extract some censuses because results were either never or have not yet released by the coordinating organisation. In total, 749 location-years of registry data was extracted for 28 locations.

Any instance of published limitations of the census was also noted, including both limitations identified by media and independent experts in addition to limitations provided by the country's statistical division upon publication. In total, data were outliered from 89 censuses because they were representative of only a subset of the population, utilised questionable methods, or were inconsistent with adjacent data. Some censuses were excluded because countries may have artificially inflated population counts or undercounted minorities for political reasons. Others were excluded because they failed to enumerate the non-white population (for example, Rwanda in 1953 and Burundi in both 1952 and 1958).

### Section 4.2.3: Data processing

Population data could be inaccurate due to age misreporting, representativeness of the de facto population, and under/over-enumeration. While identifying censuses, we preferentially utilised raw census and registry population counts. Then, we corrected for the issues mentioned by applying a standardised set of methods.

The first step was to distribute counts of individuals for whom age and/or sex were unknown. The age-sex structure of the remaining data from that particular census was used to distribute the counts of this group of individuals.

The next step was to adjust for age heaping that occurs when, instead of reporting their exact age, individuals report their age as a round number (usually ending in 0 or 5). Population totals were aggregated first to the largest age interval length originally in the data, so each population count was in standardised age groups and the censuses with unusually wide age groups were collapsed to total population by sex only. For each census, the age ratio score (for males and females), sex ratio score, and joint score (JS) were calculated. These measures are explained in detail in the US Census Bureau Population Analysis System documentation.<sup>57</sup>



We used a combination of three previously developed age-heaping methods for this analysis. One of these, the Feeney correction, which is applicable only in census counts with single-year age groups, redistributes people reporting their age as multiples of five to the eight adjacent single-year age groups, resulting in corrected counts with proportional adjacent age groups that then form a linear progression. The corrected counts are reported in five-year age groups. The Arriaga correction takes input census counts in five-year age groups and smooths them by combining the three nearest ten-year age groups with a second-degree polynomial. The advantage of using this technique instead of other similar methods is that it also smooths the youngest and oldest age groups. The Arriaga strong method averages three consecutive ten-year age groups, which addresses cases with severe age misreporting. These three methods were used in countries outside of the high-income and central Europe, eastern Europe, and central Asia super-regions according to the age group length of the population counts and the JS, as seen below in table H.

*Table H. Age heaping corrections*

| Age group length | Joint score (JS) | Age heaping correction |
|------------------|------------------|------------------------|
| 1                | JS ≤ 20          | None                   |
| 1                | JS > 20          | Feeney                 |
| 5                | JS ≤ 20          | None                   |
| 5                | 20 < JS ≤ 40     | Arriaga                |
| 5                | JS > 40          | Arriaga strong         |
| 10               | JS ≤ 20          | None                   |
| 10               | JS > 20          | Arriaga strong         |
| Total population | Not available    | None                   |

After performing a visual inspection, 35 censuses were identified as being incorrectly scored or poor-quality, and these data were not corrected for age heaping. This was predominantly due to sex ratio scores that were higher than normal, but still thought to be a real phenomenon, occurring among the Persian Gulf states, for example. 21 censuses were also identified as exhibiting age heaping but were not corrected due to being in either the high-income or the central Europe, eastern Europe, and central Asia super-regions. After applying age heaping corrections, we aggregated the single-year age group population counts conducted outside of the high-income and the central Europe, eastern Europe, and central Asia super-regions into five-year age groups.

For the third step, we corrected data in cases that were not representative of the de facto population of interest, either due to the coverage of geographical area, subpopulations, or a combination of both. A number of countries that exist in 2021 are combinations of two or more countries that existed in the past, such as Germany. In other countries, semi-autonomous territories have conducted separate censuses, such as Transnistria, and others still have contemporary states that are part of historical aggregates, such as the states that were previously part of Yugoslavia. Censuses for fragmented or semi-autonomous areas often occurred in different years and collected information about different age groups.

We estimated the population of the complete modern geographic unit for which we had a time series of separate censuses from all constituent historical or disputed territories. All available censuses for the constituent parts were collapsed to the most granular set of common age groups. Age-sex-specific populations were interpolated after standardisation using the age-sex-specific annual rate of change to generate annual time series spanning the available census data for each constituent. Finally, for all original census years corresponding to the largest constituent where there was also overlap with the estimated populations from the constituents that were smaller, the populations of all the constituents were summed at the age-sex level to produce a census estimate that was representative of the entire modern geography. This method was utilised in the combination of censuses from East and West Germany, Moldova and Transnistria, Cyprus and the Turkish Republic of Northern Cyprus, Serbia and Kosovo, and Malaysia Peninsular, Sarawak, and Sabah. For modern countries formerly part of Yugoslavia, only historical census data that were reported according to ethnic (rather than geographical) affiliation were able to be extracted. In these cases, the estimated age-sex proportions of the total historical aggregate population from the

previous iteration of the Bayesian demographic balancing model were applied to create modern geographies from the historic census data. These split data were used only for Serbia, as census data for the five other modern countries that were formerly part of Yugoslavia were obtained.

Singapore censuses only contained granular age and sex population counts for residents, but non-residents accounted for a significant portion of the de facto population, while registry data for Singapore residents and non-residents were only available in broad age groups (0–14, 15–64, 65+). Using available empirical death counts for both residents and non-residents, and assuming that both subpopulations have similar mortality rates, the relative age-pattern in the death counts was utilised to scale the resident population from the census data to the total population. These age-sex-specific population counts were then scaled to the broad age group data from the population registries in Singapore.

A fourth step was to correct for improper enumeration. Many censuses suffer from under-enumeration, since it is logistically very difficult to reach every single member of the population except in the smallest and most navigable countries. To address this issue, national statistical offices will often conduct post-enumeration surveys (PES) shortly after the completion of censuses to assess the degree to which individuals were either missed or double-counted. The PES quantifies the overall bias of a given census, and population totals can be adjusted using those results. We searched for PES using the UNSD’s list of known or planned PES efforts in the 2000 and 2010 census rounds. We looked for PES corresponding to any known census by looking through country statistical websites, academic publications, the WorldCat catalog, and data presented by countries during UN Stats symposia on the topic of PES. 152 PES were identified that reported a net under-enumeration percentage, of which 34 reported under-enumeration percentage by age and/or sex. As most extracted census data were unadjusted and a corresponding PES was unable to be identified for many cases, a simple linear regression was used to predict percentage adjustment for all ages and both sexes on the basis of the Socio-demographic Index (SDI) (section 3).

$$totalPctAdjust = \beta_0 + \beta_1 SDI + \varepsilon$$

We used the variance-covariance matrix from this model to simulate 1000 draws of the predicted total percentage adjustment (*totalPctAdjust*) for every possible value of SDI. We incorporated the variance of the 1000 draws simulated from the model into the overall calculation of population uncertainty (section 2.3.2).

Based on observations that over- and under-enumeration varies significantly depending on age and sex, the 34 PES that reported under-enumeration by age and/or sex were used to obtain an under-enumeration global age pattern. In order to address the issue of PES reporting inconsistent age groups, we used DisMod-MR, an age-integrating Bayesian meta-regression tool widely used in GBD processes<sup>58,59</sup> and included SDI as a predictor in the model. The age-sex pattern was then shifted up or down to equal the predicted mean total percentage adjustment and was applied to all census counts where prior adjustment was not identified.

The Bayesian demographic balancing model and the cohort component method of population projection (CCMPP) requires a starting population as an input from which it can project populations forward in time, but most countries did not conduct a census in 1950. Therefore, the last step of data processing was to produce a prior estimate of the population in 1950 in each location in single-year age groups for each sex. In instances where post-processed censuses were available for 1950 with continuous single-year age groups up to the age group 95+, the census was used directly. In all other cases, aggregate age groups were split in the oldest census available with person-years lived ( ${}_nL_x$ ) in single-year age intervals from the estimated life table for that location in 1950.<sup>4</sup> Then, this age pattern was smoothed using a local first-degree polynomial with bandwidth equal to 2 if the original age groups were in age interval lengths of 1 or 5 and bandwidth equal to 5 if in larger age groups.<sup>60</sup> If this oldest census was not from 1950, we projected the census backward using an inverse version of CCMPP (assuming zero migration). A description of standard CCMPP can be found in section 4.4.1; backward CCMPP solves for the population at the previous time point rather than projecting to the next time point.

$${}_1N_{x-1}(t) = {}_1N_x(t+1) \cdot \frac{{}_1L_{x-1}(t)}{{}_1L_x(t)}$$

The equation for the open-ended age group is indeterminate and leaves what we call the upper missing triangle as the backward projection continues further back in time. The missing age groups are estimated using the 1950  ${}_nL_x$  age pattern found in the estimated life tables. In certain locations, as the census counts are projected backward, age misreporting in the older age groups becomes extremely evident and leads to implausible age patterns; we addressed this by collapsing the original census to a lower open-ended age group, thereby ignoring the information for the oldest age groups in the original census. 34 countries used annualised rate of change between the oldest two censuses to back-project the total population, then scaled the back-projected age-specific population to the back-projected total population. In 36 countries, the assumption of zero migration used in backward CCMPP is not appropriate, or the oldest census was not close enough temporally to 1950 to back-project a reasonable age pattern; in these countries we instead used previous GBD population estimates in 1950 as the baseline population. The 1950 populations were used as the prior for the Bayesian demographic balancing model but were input with considerable uncertainty to account for the fact that a census did not occur in 1950 in most countries.

### Section 4.3: Model inputs<sup>7</sup>

#### Section 4.3.1: Migration

The demographic balancing equation has four main components: population, births, deaths, and migration. Except in high-income countries, migration was not measured as well as the other components, thus impacting CCMPP which requires either the net migration proportion or net number of migrations by age, sex, and year. In locations with frequent censuses, we set the prior for net migration to zero in the Bayesian population model (further described below). However, we recognise the model is not able to estimate migration accurately when large migration occurred between censuses or in the years after the last census was conducted. Therefore, we describe our process of replacing the zero prior in these specific types of locations by identifying and extracting migration data below.

For migration, we utilised a refugee stock dataset from the United Nations High Commissioner for Refugees (UNHCR)<sup>61</sup> which included end-of-year (EOY) counts of refugees residing in each country of destination ( $D$ ), organised by country of origin ( $O$ ), to calculate net flow of refugees in or out of countries. For example, change in the number of refugees residing in Rwanda in 1994 was calculated by taking the number of refugees in the country at the EOY in 1994  $D_{RWA}(EOY 1994)$  and subtracting the number of refugees at the EOY in 1993  $D_{RWA}(EOY 1993)$ .

$$\Delta D_{RWA}[1994] = D_{RWA}(EOY 1994) - D_{RWA}(EOY 1993)$$

Likewise, change in the number of refugees originating from Rwanda who had relocated elsewhere in 1994 was calculated by taking the number of refugees originating from Rwanda at the EOY in 1994  $O_{RWA}(EOY 1994)$  and subtracting the number of refugees originating from Rwanda at the EOY in 1993  $O_{RWA}(EOY 1993)$ .

$$\Delta O_{RWA}[1994] = O_{RWA}(EOY 1994) - O_{RWA}(EOY 1993)$$

Net refugee migration for Rwanda in 1994 was calculated as:

$$\text{Net refugee migration}[1994] = (\Delta D_{RWA}[1994] - \Delta O_{RWA}[1994])$$

We converted net refugee migration to mid-year migration totals by averaging totals for adjacent years. While the UNHCR dataset also reported totals for internally displaced persons, these types of individuals were excluded from our analysis. In location-years of refugee crises, the total number of migrants were primarily made up of the large influxes or outfluxes of people, replacing the zero prior with the UNHCR data.

There are certain countries, such as Germany, Romania, the United Arab Emirates, and Bahrain, where large non-refugee migrations have taken place too recently to have been captured by the last census, so they were not accounted for in the Bayesian population model. In locations where this was the case, migration data was taken from the statistical office of the European union (EUROSTAT),<sup>62</sup> the Gulf Labour Markets, Migration and Population (GLMM) programme,<sup>63</sup> or national statistics websites.

EUROSTAT was the only source that provided age-sex-specific migration data; the other sources reported total number of migrants over specific time periods. Since age-sex-specific migration is required as an input to CCMPP,

we scaled age-sex patterns of migration to the input net migrant totals. The aggregated EUROSTAT age-sex pattern was used for most locations, but we used the Bayesian demographic balancing model's age-sex pattern for Qatar in places where the majority of migration has occurred among young adult male temporary workers (Saudi Arabia, Bahrain, United Arab Emirates, Oman, and Kuwait). Qatar was chosen because its most recent census was conducted in 2015 and captured this recent uptick in migration. Lastly, given the genocide in Rwanda in 1994, we assumed the migrant age pattern would be dissimilar to the typical migrant age pattern reported in the European Union and the age pattern of migratory workers in Qatar, so we instead used an age pattern that was uniform across age and sex for the country.

### Section 4.3.2: Mortality

The GBD mortality model produced yearly complete period life tables with single-year age groups up to age 95+, as described in section 2.

### Section 4.3.3: Fertility

The GBD fertility model produced single-year age group fertility rates between ages 10 and 54 as described in section 3.

### Section 4.3.4: Sex ratio at birth

The GBD sex ratio at birth (SRB) model produces yearly sex ratio estimates, which we used to split total livebirths into sex-specific livebirths during CCMPP. See section 3.4 for more information.

## Section 4.4: Modelling strategy<sup>7</sup>

### Section 4.4.1: CCMPP

CCMPP allows projection of population forward in discrete time intervals by age and sex by incorporating mortality, fertility, and migration estimates. Since more information about this method is provided in Preston,<sup>23</sup> we only present the fundamental equation here:

$${}_1N_x(t+1) = \left[ \left( {}_1N_{x-1}(t) + \frac{{}_1G_{x-1}[t, t+1]}{2} \right) \cdot \frac{{}_1L_x(t)}{{}_1L_{x-1}(t)} \right] + \frac{{}_1G_{x-1}[t, t+1]}{2}$$

The survivorship ratio,  $\frac{{}_1L_x}{{}_1L_{x-1}}$ , which is derived from the GBD period life tables, is used to survive any age group (except the youngest and oldest age groups, which are slightly different) forward by one time interval. One key assumption made was that the number of migrants was evenly split, with half migrating during the beginning of the time interval and the other half migrating at the end of the time interval. Although  $G$  was defined by Preston as the net flow of migrants during the projection period in the age interval  $x-1$  to  $x$ ,<sup>23</sup> we defined  ${}_1G_{x-1}$  as the net flow of migrants during the projection period for the cohort initially between age  $x-1$  and  $x$  at the beginning of the projection period because we used the GBD Bayesian demographic balancing model (described below) to estimate migration. Net migration proportions were estimated by this model instead of counts. We defined these proportions as the ratio of net migrants in a cohort to the population at the beginning of the projection period.

$${}_1g_x = \frac{{}_1G_x}{{}_1N_x}$$

This equation is for ages above 0 years, as it does not include fertility. Fertility rates are used along with population sizes in childbearing ages to calculate the age 0 population.

### Section 4.4.2: Bayesian demographic balancing model

A Bayesian hierarchical model (popReconstruct) which reconstructs population by age and sex back in time was previously developed by Wheldon and colleagues.<sup>64</sup> Baseline population counts, mortality, fertility, migration, and

sex ratio at birth were simultaneously estimated by the popReconstruct model to reconcile CCMPP's population projections with recent census data.

In Wheldon's version, bias-reduced input values reported by the United Nations were used for the necessary components of population change which included net migration. In our application of the model, we used initial GBD estimates of fertility and mortality which were derived from replicable methods. Since GBD did not produce net migration estimates due to a lack of migration data and difficulties in directly modelling the variable, we modified Wheldon's popReconstruct model to estimate net migration indirectly, consistent with available census data and the input demographic estimates.

### Section 4.4.3: Model description

In both popReconstruct and our demographic balancing model, CCMPP is embedded into a Bayesian hierarchical model. To keep the variables consistent with the popReconstruct model,  $n$ ,  $g$ ,  $s$ ,  $f$ , and  $srb$  were used to symbolise population, the net migration proportion, survivorship ratio, age-specific fertility rate, and sex-ratio at birth, respectively. We indexed the variables by sex ( $l$ ), single-year age groups ( $a$ ) and single calendar years ( $t$ ). Initial parameter values are indicated by an asterisk (\*).

Level 1: The percentage difference between non-baseline sex-age-year-specific census counts ( $n_{l,a,t}^*$ ) and the corresponding projected sex-age-year-specific populations counts ( $n_{l,a,t}$ ) from CCMPP in Level 2 was modelled. We modelled percentage difference to ensure the variance ( $\sigma_{n_{l,a,t}^*}^2$ ) associated with each census datapoint was estimated on a consistent scale across age groups and locations for a variety of population magnitudes.

$$\text{Level 1: } \frac{n_{l,a,t}^* - n_{l,a,t}}{n_{l,a,t}} \sim \text{Normal}(0, \sigma_{n_{l,a,t}^*}^2)$$

Level 2: The model inputs were transformed into projected sex-age-year-specific population counts ( $n_{l,a,t}$ ).

$$\text{Level 2: } n_{l,a,t} = \text{CCMPP}(n_{l,a,t_0}, g_{l,a,t}, s_{l,a,t}^*, f_{l,a,t}^*, srb_t^*)$$

Level 3: The net migration proportion ( $g_{l,a,t}$ ) and baseline population in 1950 ( $n_{l,a,t_0}$ ) were modelled. Like in level 1, the baseline population was modelled as the percentage difference between the estimated baseline population in 1950 and the input values. To avoid major discontinuities in the age pattern and time series, net migration proportion was modelled as an autoregressive process over age and time. Contrary to the popReconstruct model, we did not also estimate ASFR ( $f_{l,a,t}^*$ ), survival ratios ( $s_{l,a,t}^*$ ) and sex ratio at birth ( $srb_t^*$ ) because the zero prior for migration makes it difficult to jointly estimate all components.

$$\text{Level 3: } \frac{n_{l,a,t_0} - n_{l,a,t}^*}{n_{l,a,t_0}} \sim \text{Normal}\left(0, \sigma_{n_{l,a,t_0}^*}^2\right)$$

$$g_{l,a,t} - g_{l,a,t}^* \sim \text{AR1: AR1}(\sigma_g, \rho_{g_a}, \rho_{g_t})$$

Level 4: Hyper-priors were defined for the prior distribution on the net migration proportion. We specified greater correlation over time than age for the net migration proportion correlation.

$$\text{Level 4: } \log(\sigma_g) \sim \text{Normal}(-5, 9)$$

$$\text{logit}(\rho_{g_a}) \sim \text{Normal}(-3, 0.01)$$

$$\text{logit}(\rho_{g_t}) \sim \text{Normal}(3, 0.01)$$

Rather than estimating one variance term for all census counts, the initial standard deviation for every age-sex-year-specific census datapoint ( $\sigma_{n_{l,a,t}^*}$ ) was set to 0.01 for locations in the high-income super-region, 0.03 for locations in the central Europe, eastern Europe, and central Asia super-region, and 0.05 for locations in the other super-regions. Several issues were addressed by multiplying the standard deviation by scalars in order to adjust the weight of a

datapoint. These issues included: 1) We doubled the standard deviation of the 1950 baseline counts so that the estimated baseline count could change considerably from the input 1950 counts from census processing. 2) Our model was constructed to compare projected population counts to the available census age groups, whether that was single-year age groups or just total population. When a census only had less granular age groups, there were fewer datapoints included, which gave less weight to the census year as a whole. To resolve this, the standard deviation for each census datapoint was divided by the age interval's width, resulting in all censuses being assigned similar weights. 3) Age misreporting among older ages was accounted for by multiplying the standard deviation by a scalar which increased linearly from 1 among 50-year-olds to 3 among 95+-year-olds in the terminal age group. 4) Under-enumeration in the under-5 age group was addressed by multiplying standard deviation of population counts by a linear scalar that increased from 1 for age 5 to 3 for age 0. For the locations not included in the high-income or central Europe, eastern Europe, and central Asia super-regions, non-baseline under-5 population counts were not input for all censuses, making under-5 populations dependent on the fertility estimates, under-5 mortality estimates, and census counts from older age groups.

Older age misreporting seemed to be quite common, demonstrated by the unrealistically large immigration values produced by the model to compensate for the high counts of individuals among the older age groups. This problem was partly addressed by the methods we described above which gave less weight to census counts among the older age groups. In addition, we ran the model multiple times for each location with each version excluding data above a certain maximum age between 55 and 95. Upon completion of each model version for a location, we calculated: 1) mean average percentage error (MAPE) to compare input census data to the estimated population for each datapoint that was included in the model and 2) the weighted mean of the absolute value of the net migration proportions for five-year age groups between 55 and 95 by assigning a weight equal to 1 for age group 55, 2 for age group 60, and so on, capping at a weight of 9 assigned to age group 95+. Then, we selected the version with the highest maximum age that was within 5% of the minimum MAPE value from the various model versions and within 0.005 of the minimum weighted mean net migration proportion for older age groups. By using this method, we were able to balance decreasing migration among the oldest age groups and ensure a good fit to the census data we included in our model.

For each location, we separately fit the Bayesian demographic balancing model from 1950 to 2021 with single-year age groups up to the terminal age group of 95+. CCMPP was used to derive final population estimates using GBD estimates of mortality, fertility, and sex ratio at birth as well as posterior estimates of baseline population and the net migration proportion.

#### **Section 4.4.4: Population uncertainty**

After estimating a complete time series of age-sex-specific population with CCMPP, we estimated population uncertainty using a combination of out-of-sample predictive validity and uncertainty in the adjustment for census completeness (section 2.3.1).

A major cause of uncertainty was related to the PES results and the census completeness model, leading to additional uncertainty in population estimates for all years, since censuses are used to inform population size in both census and non-census years. Using our census completeness model, we calculated the variance of the percentage adjustment for completeness ( $Var_{completeness}$ ) that was associated with each location-year and dependent on the SDI value.

There was additional uncertainty in our population estimates for non-census years which was related to the amount of time to the closest census and GBD estimates of mortality, fertility, and migration. To measure this, we withheld census data in the 143 national locations where there were a minimum of five censuses with age-sex-specific population totals after undergoing post-census processing (section 2.3.1). For each location, the model was fit 20 times using a random subset of one to five of the location's censuses. Percentage error between the held-out census data and the projected posterior population estimates were compiled across locations by the absolute number of years from the closest census. We then fit a linear regression on the root mean squared percentage error ( $RMSPE$ ) as a function of the number of years to the closest census ( $YearsToCensus$ ).

$$RMSPE = \beta_0 + \beta_1 YearsToCensus + \varepsilon_i$$

For each location-year, we then had the predicted variance of the percentage adjustment for completeness ( $Var_{completeness}$ ) based on the specific year's SDI and the predicted out-of-sample percentage error based on the distance from the closest census ( $RMSPE$ ). We combined these sources of uncertainty in variance space.

$$Var_{pop} = Var_{completeness} + RMSPE^2$$

We used the total variance for population to take simulated draws of the population percentage error ( $PopPctError$ ) by location-year.

$$PopPctError \sim Normal(0, Var_{pop})$$

Finally, these percentage errors were used to calculate new population draws which incorporated both PES adjustment uncertainty and also out-of-sample variance associated with estimation errors in the GBD fertility, mortality, and migration estimates and the amount of time to the closest census.

$$Pop_{draw} = Pop_{mean} + (Pop_{mean} * PopPctError_{draw})$$

#### Section 4.4.5: GBD world population age standard

The GBD world population age standard was used to calculate age-standardised rates presented throughout GBD. In previous GBD years, 2013, 2015, and 2016, specifically, a standard population age structure was generated by taking the non-weighted mean of the 2010 to 2035 age-specific proportional distributions for national locations reported by the UNPOP World Population Prospects 2012 revision. Beginning in GBD 2017, we used the non-weighted mean of the GBD year's age-specific proportional distributions for national locations with populations greater than 5 million in the GBD year to update the world population age standard. The final values used for the age standard can be found in appendix table S14.

## Section 5: Socio-demographic Index (SDI) analysis<sup>7</sup>

### Section 5.1: Overview

The Socio-demographic Index (SDI) is a summary indicator created to get at the background social and economic conditions that shape health outcomes in a given location. Introduced in GBD 2015,<sup>46</sup> and further refined in GBD 2019,<sup>7</sup> it represents an update to the Human Development Index (HDI), while also providing an alternative to outdated development language.

SDI includes three components. It includes an economic indicator, lag-distributed income (LDI)<sup>7</sup> per capita, as well as two demographic indicators, total fertility rate under the age of 25 (TFU25) and mean educational attainment for those aged 15 and older (EDU15+). TFU25 is intended to serve as an indicator of the status of women. Beginning in GBD 2017, we began using TFU25 instead of total fertility rate (TFR), because we found it to be a better proxy for women's status.<sup>5</sup>

To create the index, we rescaled each component to obtain a value between 0 and 1. We set this scale using selected health indicators. At the low end of this scale, 0 represents the minimum level of each covariate input past which selected health outcomes do not get worse. At the high end of this scale, 1 represents the maximum level of each covariate input past which selected health outcomes do not improve. Finally, we calculated SDI by taking the geometric mean of those rescaled values.

### Section 5.2: SDI calculation

Further refinements to the method for calculating SDI have been implemented since the original development in the 2015 cycle. Beginning in GBD 2017, we decided to use TFU25 instead of the TFR component. The rationale for this was to attempt to better capture women's social status, given that it covers ages when women tend to enter the workforce and pursue further educational opportunities. It is also important that there has been a consistent decline in TFU25 over time in highly developed countries. In contrast, there have been rebounds in TFR driven by increasing fertility in older ages. The concordance correlation coefficient was 0.981 between SDI using the GBD 2016 method and the updated GBD 2017 method.<sup>3,4</sup>



In order to improve the stability of the interpretation of SDI over time, we switched from relative index scales to absolute index scales during GBD 2016 when we noticed the introduction of subnational units led to stretched empirical minima and maxima.<sup>7</sup> The minima and maxima of the scales were selected by looking at the relationships between each of the inputs and life expectancy at birth and under-5 mortality, then identifying points of limiting returns at both high and low values, if they occurred prior to theoretical limits (eg, EDU15+ of 0).

An index score of 0 therefore represents the point at which decreasing each covariate does not worsen selected health outcomes and an index score of 1 represents the level at which increasing the level of each covariate does not improve selected health outcomes. The means that a location with an SDI of 1 would have the theoretical maximum level of development relevant to these selected health outcomes. A location with an SDI of 0, on the other hand, would have the theoretical minimum level of development relevant to these selected health outcomes.

Using scales defining the upper and lower bound for each input, we computed the index scores underlying SDI as follows:

$$I_{cly} = \frac{(C_{ly} - C_{low})}{(C_{high} - C_{low})}$$

Where  $I_{cly}$  – the index for covariate  $C$ , location  $l$ , and year  $y$  – is equal to the quotient of the difference between the value of that covariate in that location-year and the lower bound of the covariate and the difference between the upper and lower bounds for that covariate. If the values of input covariates fell above the upper bounds or below the lower bounds, they were set equal to the respective upper or lower bounds. The index value for TFU25 was computed as  $1 - I_{TFU25ly}$ , to account for the negative relationship between TFU25 and development, and thus between TFU25 and index score. For GBD 2021, we expanded the computation of SDI to 1055 national and subnational locations spanning the time period 1950 to 2021.

The composite SDI was calculated as the geometric mean of these three indices (LDI, TFU25, EDU15+) for a given location-year. The cutoff values used to determine quintiles for analysis were then computed using country-level estimates of SDI for the year 2021, excluding countries with populations less than 1 million. Annual SDI values can be found in appendix tables S15–17.

## Section 6: Additional methods

### Section 6.1: Correlation estimation<sup>7</sup>

To estimate correlation, we used the Pearson correlation coefficient, defined by the function below.<sup>65</sup>

$$\hat{\rho} = \frac{\sum_{i=1}^n w_i (x_i - \bar{x})(y_i - \bar{y})}{\sqrt{\sum_{i=1}^n w_i (x_i - \bar{x})^2} \sqrt{\sum_{i=1}^n w_i (y_i - \bar{y})^2}}$$

Where

$w_i$  are the weights, if specified, or  $w_i = 1$  if weights are not specified

$\bar{x} = (\sum w_i x_i) / (\sum w_i)$  is the mean of  $x$

$\bar{y}$  is similarly defined

### Section 6.2: Annualised rates of change<sup>7</sup>

We calculated annualised rates of change by taking the log of  ${}_5q_0$  in the target year ( $y + t$ ), dividing that by the  ${}_5q_0$  at the baseline year  $y$ , and dividing that by the difference in years between the target and baseline years ( $t$ ), using the following equation:



$$aroc_{5q_0} = \frac{\ln\left(\frac{5q_0 y+t}{5q_0 y}\right)}{t}$$

### Section 6.3: Gross domestic product (GDP) and lag-distributed income<sup>7</sup>

We used four gross domestic product (GDP) per capita series to calculate GDP per capita: World Bank World Development Indicators, International Monetary Fund World Economic Outlook report, Angus Maddison’s research homepage at the University of Groningen Department of Economics, and the University of Pennsylvania (Penn) Center for International Comparisons of Production, Income, and Prices.<sup>66–70</sup> We imputed each series separately using growth regressions and then averaged the four series to make a unified GDP per capita series for GBD. We used mixed effects regression with region-specific random effects to interpolate or extrapolate any country data that were missing from all four series. These methods are described in full in by James and colleagues.<sup>71</sup>

Lag-distributed income (LDI) per capita is a moving average transformation of GDP per capita. We calculated LDI, a ten-year lagged average of GDP, with the formula below:

$$LDI_{pc,t} = \frac{1}{5.5} \left( GDPpc_t + \sum_{i=1}^9 GDPpc_{t-i} \cdot \left(1 - \frac{i}{10}\right) \right)$$

where LDI at time  $t$  is a function of current GDP (at  $t$ ) and the previous nine years of GDP with an inverse moving weight and a normalisation factor (the sum of all weights).

### Section 6.4: Educational attainment covariate

We based our estimates of average years of education on a collection of 6319 censuses and household surveys. The approach we used to estimate educational attainment, which we describe below, has been recently published<sup>72</sup> and draws upon previously established methods.<sup>23,73</sup> Educational data sources used have information about the distribution of educational attainment and must be granular by country or territory, year, sex, and five-year or ten-year age groups. Some sources only provided education data for multi-year bins (eg, the percentage of the population with between two and five years of completed schooling), which were probabilistically split into single-year proportions using a previously published crosswalk model.<sup>74</sup> Data were top coded to 18 years of education.

We then adjusted for systematic biases between data providers in a regional and location-specific fashion. We used a mixed-effects regression model with random effects for data provider and nested random effects for data provider within country to adjust the quantity of interest, either proportion of the population with no education or the mean years of educational attainment. Next, we used age-cohort imputation<sup>72</sup> to carry educational attainment in observed cohorts forward through time, since education levels are relatively constant after age 25. To model the changes by age within cohorts, we used data from all available cohorts with multiple observations at or after age 25. For datapoints from cohorts aged 25 or older, we extrapolated the data forward and backward in time so all year-age combinations in that cohort contained that data (eg, a datapoint for a cohort aged 40–44 in 1995 was projected forward for 45–49-year-olds in 2000, 50–54-year-olds in 2005, etc. and backward for 35–39-year-olds in 1990, 30–34-year-olds in 1985, etc.). The details of both the adjustment and cohort extrapolation models are described elsewhere.<sup>72</sup>

After adjustment and imputation, GPR was used to ensure final model results were consistent with input data and to incorporate model and data uncertainty to produce uncertainty intervals. This allowed us to estimate a complete single-year series of educational attainment from 1950 through 2021 by age, sex, and location. GPR assumes that the trend in the underlying data follows a Gaussian process, which is defined using a mean function  $m(\cdot)$  and a covariance function  $Cov(\cdot)$ . To define the mean function, we calculated the mean level of educational attainment of the country-age-year-specific population,  $Edu_{c,a,s,t}$ , using the following formula:

$$\text{logit}\left(\frac{\text{Edu}_{c,a,s,t}}{\text{Edu}_{\max_a}}\right) = \beta_{s,r} + \delta_{s,r} \text{Year} + I_{s,r} + \alpha_{c,a,s}$$

$$\alpha_{c,a,s} \sim N(0, \sigma_\alpha^2)$$

where:

$c$  is location,  $a$  is age,  $s$  is sex,  $t$  is time

$\text{Edu}_{\max_a}$  is the maximum mean educational attainment for each age group, defined as 3 for ages 5-9, 8 for ages 10-14, 13 for ages 15-19, and 18 for all age groups 20-24 and up

$\beta_{s,r}$  is a sex- and region-specific intercept

$\delta_{s,r}$  captures the linear secular trend for each sex and region

$I_{s,r}$  is a natural spline on age to capture the non-linear age pattern by sex and region, with knots at 45 and 65 years of age

$\alpha_{c,s}$  is a country-sex-specific random intercept.

The covariance function of the model was derived using a Matérn covariance function, consistent with prior applications of GPR:

$$M(y, y') = \sigma^2 \frac{2^{1-\nu}}{\Gamma(\nu)} \left( \frac{d(y, y')\sqrt{2\nu}}{\iota} \right)^\nu \kappa_\nu \left( \frac{d(y, y')\sqrt{2\nu}}{\iota} \right)$$

Where:

$d(\cdot)$  is a distance function

$\sigma^2$  is the marginal variance

$\nu$  is a smoothness hyper parameter defining the differentiability of the function

$\iota$  is a link-scale parameter approximately equivalent to the number of years at which two points are no longer correlated

$\kappa_\nu$  is the Bessel function

$\Gamma(\cdot)$  is the gamma function

Similar to previous applications of GPR, we approximated  $\sigma_p^2$  as the super-region and sex-specific residual from the mean function, with  $\nu$  set to 2 and  $\iota$  to 40, to reflect the inherent smoothness of educational attainment trends over time.

Lastly, we used GPR to smooth the age-period model residuals. This step allowed us to account for uncertainty in each datapoint and combine data and model uncertainty to estimate UIs. Final covariates are aggregated to the age-sex of interest.

## Section 7: References

- 1 Stevens G, Alkema L, Black R, et al. Guidelines for Accurate and Transparent Health Estimates Reporting: the GATHER statement. *The Lancet* 2016; **388**: 19–23.
- 2 Wang H, Dwyer-Lindgren L, Lofgren K, et al. Age-specific and sex-specific mortality in 187 countries, 1970–2010: a systematic analysis for the Global Burden of Disease Study 2010. *The Lancet* 2012; **380**: 2071–94.
- 3 GBD 2016 Mortality Collaborators. Global, regional, and national under-5 mortality, adult mortality, age-specific mortality, and life expectancy, 1970–2016: a systematic analysis for the Global Burden of Disease Study 2016. *The Lancet* 2017; **390**: 1084–150.
- 4 GBD 2017 Mortality Collaborators. Global, regional, and national age-sex-specific mortality and life expectancy, 1950–2017: a systematic analysis for the Global Burden of Disease Study 2017. *The Lancet* 2018; **392**: 1684–735.
- 5 GBD 2017 Population and Fertility Collaborators. Population and fertility by age and sex for 195 countries and territories, 1950–2017: a systematic analysis for the Global Burden of Disease Study 2017. *The Lancet* 2018; **392**: 1995–2051.
- 6 GBD 2017 DALYs and HALE Collaborators. Global, regional, and national disability-adjusted life-years (DALYs) for 359 diseases and injuries and healthy life expectancy (HALE) for 195 countries and territories, 1990–2017: a systematic analysis for the Global Burden of Disease Study 2017. *The Lancet*; **392**: 1859–922.
- 7 GBD 2019 Demographics Collaborators. Global age-sex-specific fertility, mortality, healthy life expectancy (HALE), and population estimates in 204 countries and territories, 1950–2019: a comprehensive demographic analysis for the Global Burden of Disease Study 2019. *The Lancet* 2020; **396**: 1160–203.
- 8 Ministry of Local Government and Modernisation (Norway). Regulations for the 2019 local government elections for municipalities and counties that are subject to boundary changes that come into effect January 1st 2020. 2019; published online March 20. <https://www.regjeringen.no/en/dokumenter/regulations-for-the-2019-local-government-elections-for-municipalities-and-counties-that-are-subject-to-boundary-changes-that-come-into-effect-january-1st-2020/id2637010/> (accessed Sept 1, 2023).
- 9 Rajaratnam J, Tran L, Lopez A, Murray C. Measuring under-five mortality: validation of new low-cost methods. *PLOS Med* 2010; **7**: e1000253.
- 10 Wang H, Liddell C, Coates M, et al. Global, regional, and national levels of neonatal, infant, and under-5 mortality during 1990–2013: a systematic analysis for the Global Burden of Disease Study 2013. *The Lancet* 2015; **386**: 957–79.
- 11 Murray C, Ezzati M, Flaxman A, et al. GBD 2010: design, definitions, and metrics. *The Lancet* 2012; **380**: 2063–6.
- 12 Child Mortality Collaborators. Global, regional, national, and selected subnational levels of stillbirths, neonatal, infant, and under-5 mortality, 1980–2015: a systematic analysis for the Global Burden of Disease Study 2015. *The Lancet* 2016; **388**: 1725–74.
- 13 Gompertz B. Gompertz B. On one uniform law of mortality from birth to extreme old age, and on the law of sickness. *J Inst Actuar Assur Mag* 1871; **16**: 329–44.
- 14 Sharrow D, Hug L, You D, et al. Global, regional, and national trends in under-5 mortality between 1990 and 2019 with scenario-based projections until 2030: a systematic analysis by the UN Inter-agency Group for Child Mortality Estimation. *Lancet Glob Health* 2022; **10**: e195–206.

- 15 United Nations Inter-agency Group, for Child Mortality Estimation. Levels & Trends in Child Mortality. 2022 <https://childmortality.org/wp-content/uploads/2023/01/UN-IGME-Child-Mortality-Report-2022.pdf>.
- 16 Brocklehurst P, French R. The association between maternal HIV infection and perinatal outcome: a systematic review of the literature and meta-analysis. *Br J Obstet Gynaecol* 1998; **105**: 836–48.
- 17 Kim H-Y, Kasonde P, Mwiya M, et al. Pregnancy loss and role of infant HIV status on perinatal mortality among HIV-infected women. *BMC Pediatr* 2012; **12**: 138.
- 18 Kerber K, Lawn J, Johnson L, et al. South African child deaths 1990-2011: have HIV services reversed the trend enough to meet Millennium Development Goal 4? *AIDS Lond Engl* 2013; **27**: 2637–48.
- 19 Bradshaw D, Dorrington R. Child mortality in South Africa - we have lost touch. *Afr Med J* 2007; **97**: 582.
- 20 Murray C, Rajaratnam J, Marcus J, Laakso T, Lopez A. What can we conclude from death registration? *PLOS Med* 2010; **7**: e1000262.
- 21 Hill K. Estimating census and death registration completeness. *Asian Pac Popul Forum* 1987; **1**: 8–13, 23–4.
- 22 Brass W, Coale A. Methods of analysis and estimation in mathematical demography. In: Smith D, Keyfitz N, eds. *Mathematical Demography*. Biomathematics, vol 6. Springer, Berlin, Heidelberg, 1977: 307–13.
- 23 Preston S. The changing relation between mortality and level of economic development. *Popul Stud* 1975; **29**: 231–48.
- 24 Preston S, Coale A, Trussell J, Weinstein M. Estimating the completeness of reporting of adult deaths in populations that are approximately stable. *Popul Index* 1980; **46**: 179–202.
- 25 Bennett N, Horiuchi S. Estimating the completeness of death registration in a closed population. *Popul Index* 1981; **47**: 207–11.
- 26 Obermeyer Z, Rajaratnam J, Park C, et al. Measuring adult mortality using sibling survival: a new analytical method and new results for 44 countries, 1974–2006. *PLOS Med* 2010; **7**: e1000260.
- 27 Gakidou E, King G. Death by survey: estimating adult mortality without selection bias from sibling survival data. *Demography* 2006; **43**: 569–85.
- 28 Masquelier B. Adult mortality from sibling survival data: a reappraisal of selection biases. *Demography* 2013; **50**: 207–28.
- 29 Rogers R, Crimmins E, editors. *International handbook of adult mortality*. Springer Netherlands, 2011.
- 30 Murray C, Ferguson B, Lopez A, Guillot M, Salomon J, Ahmad O. Modified logit life table system: principles, empirical validation, and application. *Popul Stud* 2003; **57**: 165–82.
- 31 King G, Tomz M, Wittenberg J. Making the most of statistical analyses: improving interpretation and presentation. *Am J Polit Sci* 2000; **44**: 341–55.
- 32 GBD 2017 Causes of Death Collaborators. Global, regional, and national age-sex-specific mortality for 282 causes of death in 195 countries and territories, 1980–2017: a systematic analysis for the Global Burden of Disease Study 2017. *The Lancet* 2018; **392**: 1736–88.
- 33 Wang H, Wolock T, Carter A, et al. Estimates of global, regional, and national incidence, prevalence, and mortality of HIV, 1980–2015: the Global Burden of Disease Study 2015. *Lancet HIV* 2016; **3**: e361-87.

- 34 Themnér L. UCDP/PRIO Armed Conflict Dataset codebook version 18.1. Uppsala Conflict Data Program (UCDP) and Center for the Study of Civil Wars - International Peace Research Institute (PRIO), 2012.
- 35 Obermeyer Z, Murray C, Gakidou E. Fifty years of violent war deaths from Vietnam to Bosnia: analysis of data from the world health survey programme. *BMJ* 2008; **336**: 1482–6.
- 36 Leitenberg M. Rwanda, 1994: international incompetence produces genocide. *Peacekeeping Int Relat* 1994; **23**.
- 37 Jarvis C. The rise and fall of Albania's pyramid schemes. *Finance Dev* 2000; **37**.
- 38 Centre for Research on the Epidemiology of Disaster (CRED). EM-DAT: The OFDA/CRED International Disaster Database. Brussels: Catholic University of Leuven.
- 39 Jisheng Y, Friedman E, Guo J, Mosher S. Tombstone: the great Chinese famine, 1958-1962. New York: Farrar, Straus and Giroux (Macmillan), 2012.
- 40 Inc G, Berger D. Bacterial meningitis: global status: 2017 edition. GIDEON Informatics Inc, 2017.
- 41 Inc G, Berger D. Cholera: global status: 2017 edition. GIDEON Informatics Inc, 2017.
- 42 Documented civilian deaths from violence. Iraq Body Count. 2003; published online 2020. <https://www.iraqbodycount.org/database/> (accessed Sept 10, 2023).
- 43 Hagopian A, Flaxman A, Takaro T, et al. Mortality in Iraq associated with the 2003–2011 war and occupation: findings from a national cluster sample survey by the University Collaborative Iraq Mortality Study. *PLOS Med* 2013; **10**: e1001533.
- 44 COVID-19 Excess Mortality Collaborators. Estimating excess mortality due to the COVID-19 pandemic: a systematic analysis of COVID-19-related mortality, 2020–21. *The Lancet* 2022; **399**: 1513–36.
- 45 Fragoso TM, Bertoli W, Louzada F. Bayesian Model Averaging: A Systematic Review and Conceptual Classification. *Int Stat Rev* 2018; **86**: 1–28.
- 46 GBD 2015 Mortality and Causes of Death Collaborators. Global, regional, and national life expectancy, all-cause mortality, and cause-specific mortality for 249 causes of death, 1980–2015: a systematic analysis for the Global Burden of Disease Study 2015. *The Lancet* 2016; **388**: 1459–544.
- 47 United Nations Department of Economic and Social Affairs. United Nations Demographic Yearbook. New York: United Nations, 2020 [https://unstats.un.org/unsd/demographic-social/products/dyb/dyb\\_2020/](https://unstats.un.org/unsd/demographic-social/products/dyb/dyb_2020/).
- 48 Max Planck Institute for Demographic Research (Germany), Vienna Institute of Demography (Austria). Human Fertility Collection. [www.fertilitydata.org](http://www.fertilitydata.org) (accessed July 6, 2021).
- 49 Max Planck Institute for Demographic Research (Germany), Vienna Institute of Demography (Austria). Human Fertility Database. [www.fertilitydata.org](http://www.fertilitydata.org) (accessed Sept 13, 2022).
- 50 World Health Organization. WHO Mortality Database. <https://www.who.int/data/data-collection-tools/who-mortality-database> (accessed Sept 1, 2023).
- 51 Preston S, Heuveline P, Guillot M. Demography: measuring and modeling population processes, 1 edition. Wiley-Blackwell, 2000.
- 52 United Nations Department of Economic and Social Affairs Statistics Division. Welcome to UNSD. 2020. <https://unstats.un.org/home/> (accessed Sept 10, 2023).

- 53 United Nations Department of Economic and Social Affairs. Population. <http://www.un.org/en/development/desa/population/> (accessed Sept 10, 2023).
- 54 IPUMS USA. U.S. census data for social, economic, and health research. 2019. <https://usa.ipums.org/usa/> (accessed Sept 10, 2023).
- 55 The University of Texas at Austin College of Liberal Arts. Welcome to the Population Research Center (PRC). 2020. <https://liberalarts.utexas.edu/prc/> (accessed Sept 10, 2023).
- 56 WorldCat. WorldCat. <https://www.worldcat.org/> (accessed Sept 10, 2023).
- 57 Arriaga EE, Johnson PD, Jamison E. Population analysis with microcomputers - Volume 1 Presentation of Techniques. 1994; published online Nov. <https://www2.census.gov/software/pas/documentation/pamvi-archive.pdf>.
- 58 Flaxman AD, Vos T, Murray CJL, Kiyono P. An integrative metaregression framework for descriptive epidemiology, 1st edn. Seattle: University of Washington Press, 2015.
- 59 GBD 2019 Diseases and Injuries Collaborators. Global burden of 369 diseases and injuries in 204 countries and territories, 1990–2019: a systematic analysis for the Global Burden of Disease Study 2019. *The Lancet* 2020; **396**: 1204–22.
- 60 Wand M, Ripley B. KernSmooth: functions for Kernel Smoothing supporting Wand & Jones (1995). 2015; published online June 29. <https://CRAN.R-project.org/package=KernSmooth> (accessed Sept 10, 2023).
- 61 UNCHR. UNHCR - The UN Refugee Agency. 2001; published online 2020. <http://www.unhcr.org/en-us/> (accessed Sept 10, 2023).
- 62 European Commission. EUROSTAT: your key to European statistics. 2020. <http://ec.europa.eu/eurostat> (accessed Sept 10, 2023).
- 63 European University Institute and Gulf Research Center. Gulf Labour Markets, Migration, and Population (GLMM) Programme. GLMM. 2020. <http://gulfmigration.eu/> (accessed Sept 10, 2023).
- 64 Wheldon M, Raftery A, Clark S, Gerland P. Reconstructing past populations with uncertainty from fragmentary data. *J Am Stat Assoc* 2013; **108**: 96–110.
- 65 Stata:Corp. Stata: release 13. College Station, TX: StataCorp LP, 2013.
- 66 Groningen Growth and Development Centre: Faculty of Economics and Business. The Database | Penn World Table version 10.0. <https://www.rug.nl/ggdc/productivity/pwt/> (accessed Feb 4, 2022).
- 67 The World Bank. DataBank | The World Bank. <http://databank.worldbank.org/data/home.aspx> (accessed Feb 4, 2022).
- 68 International Monetary Fund. World Economic Outlook, April 2022: War Sets Back the Global Recovery. International Monetary Fund. <https://www.imf.org/en/Publications/WEO/Issues/2022/04/19/world-economic-outlook-april-2022> (accessed June 8, 2022).
- 69 Groningen Growth and Development Centre: Faculty of Economics and Business. Maddison Project Database 2020. <https://www.rug.nl/ggdc/historicaldevelopment/maddison/releases/maddison-project-database-2020> (accessed Feb 4, 2022).
- 70 United Nations Statistics Division - National Health Accounts. National Accounts Main Aggregates Database. <https://unstats.un.org/unsd/snaama/> (accessed Feb 4, 2022).

- 71 James S, Gubbins P, Murray C, Gakidou E. Developing a comprehensive time series of GDP per capita for 210 countries from 1950 to 2015. *Popul Health Metr* 2012; **10**: 12.
- 72 Friedman J, York H, Graetz N, *et al.* Measuring and forecasting progress towards the education-related SDG targets. *Nature* 2020; **580**: 636–9.
- 73 Gakidou E, Cowling K, Lozano R, Murray C. Increased educational attainment and its effect on child mortality in 175 countries between 1970 and 2009: a systematic analysis. *Lancet Lond Eng* 2010; **376**: 959–74.
- 74 Friedman J, Graetz N, Gakidou E. Improving the estimation of educational attainment: New methods for assessing average years of schooling from binned data. *PLOS ONE* 2018; **13**: e0208019.

## Section 8: Tables and figures



Appendix Figure S1: Analytical flowchart for the estimation of all-cause mortality by age and sex, and HIV/AIDS incidence, prevalence, and mortality for GBD 2021

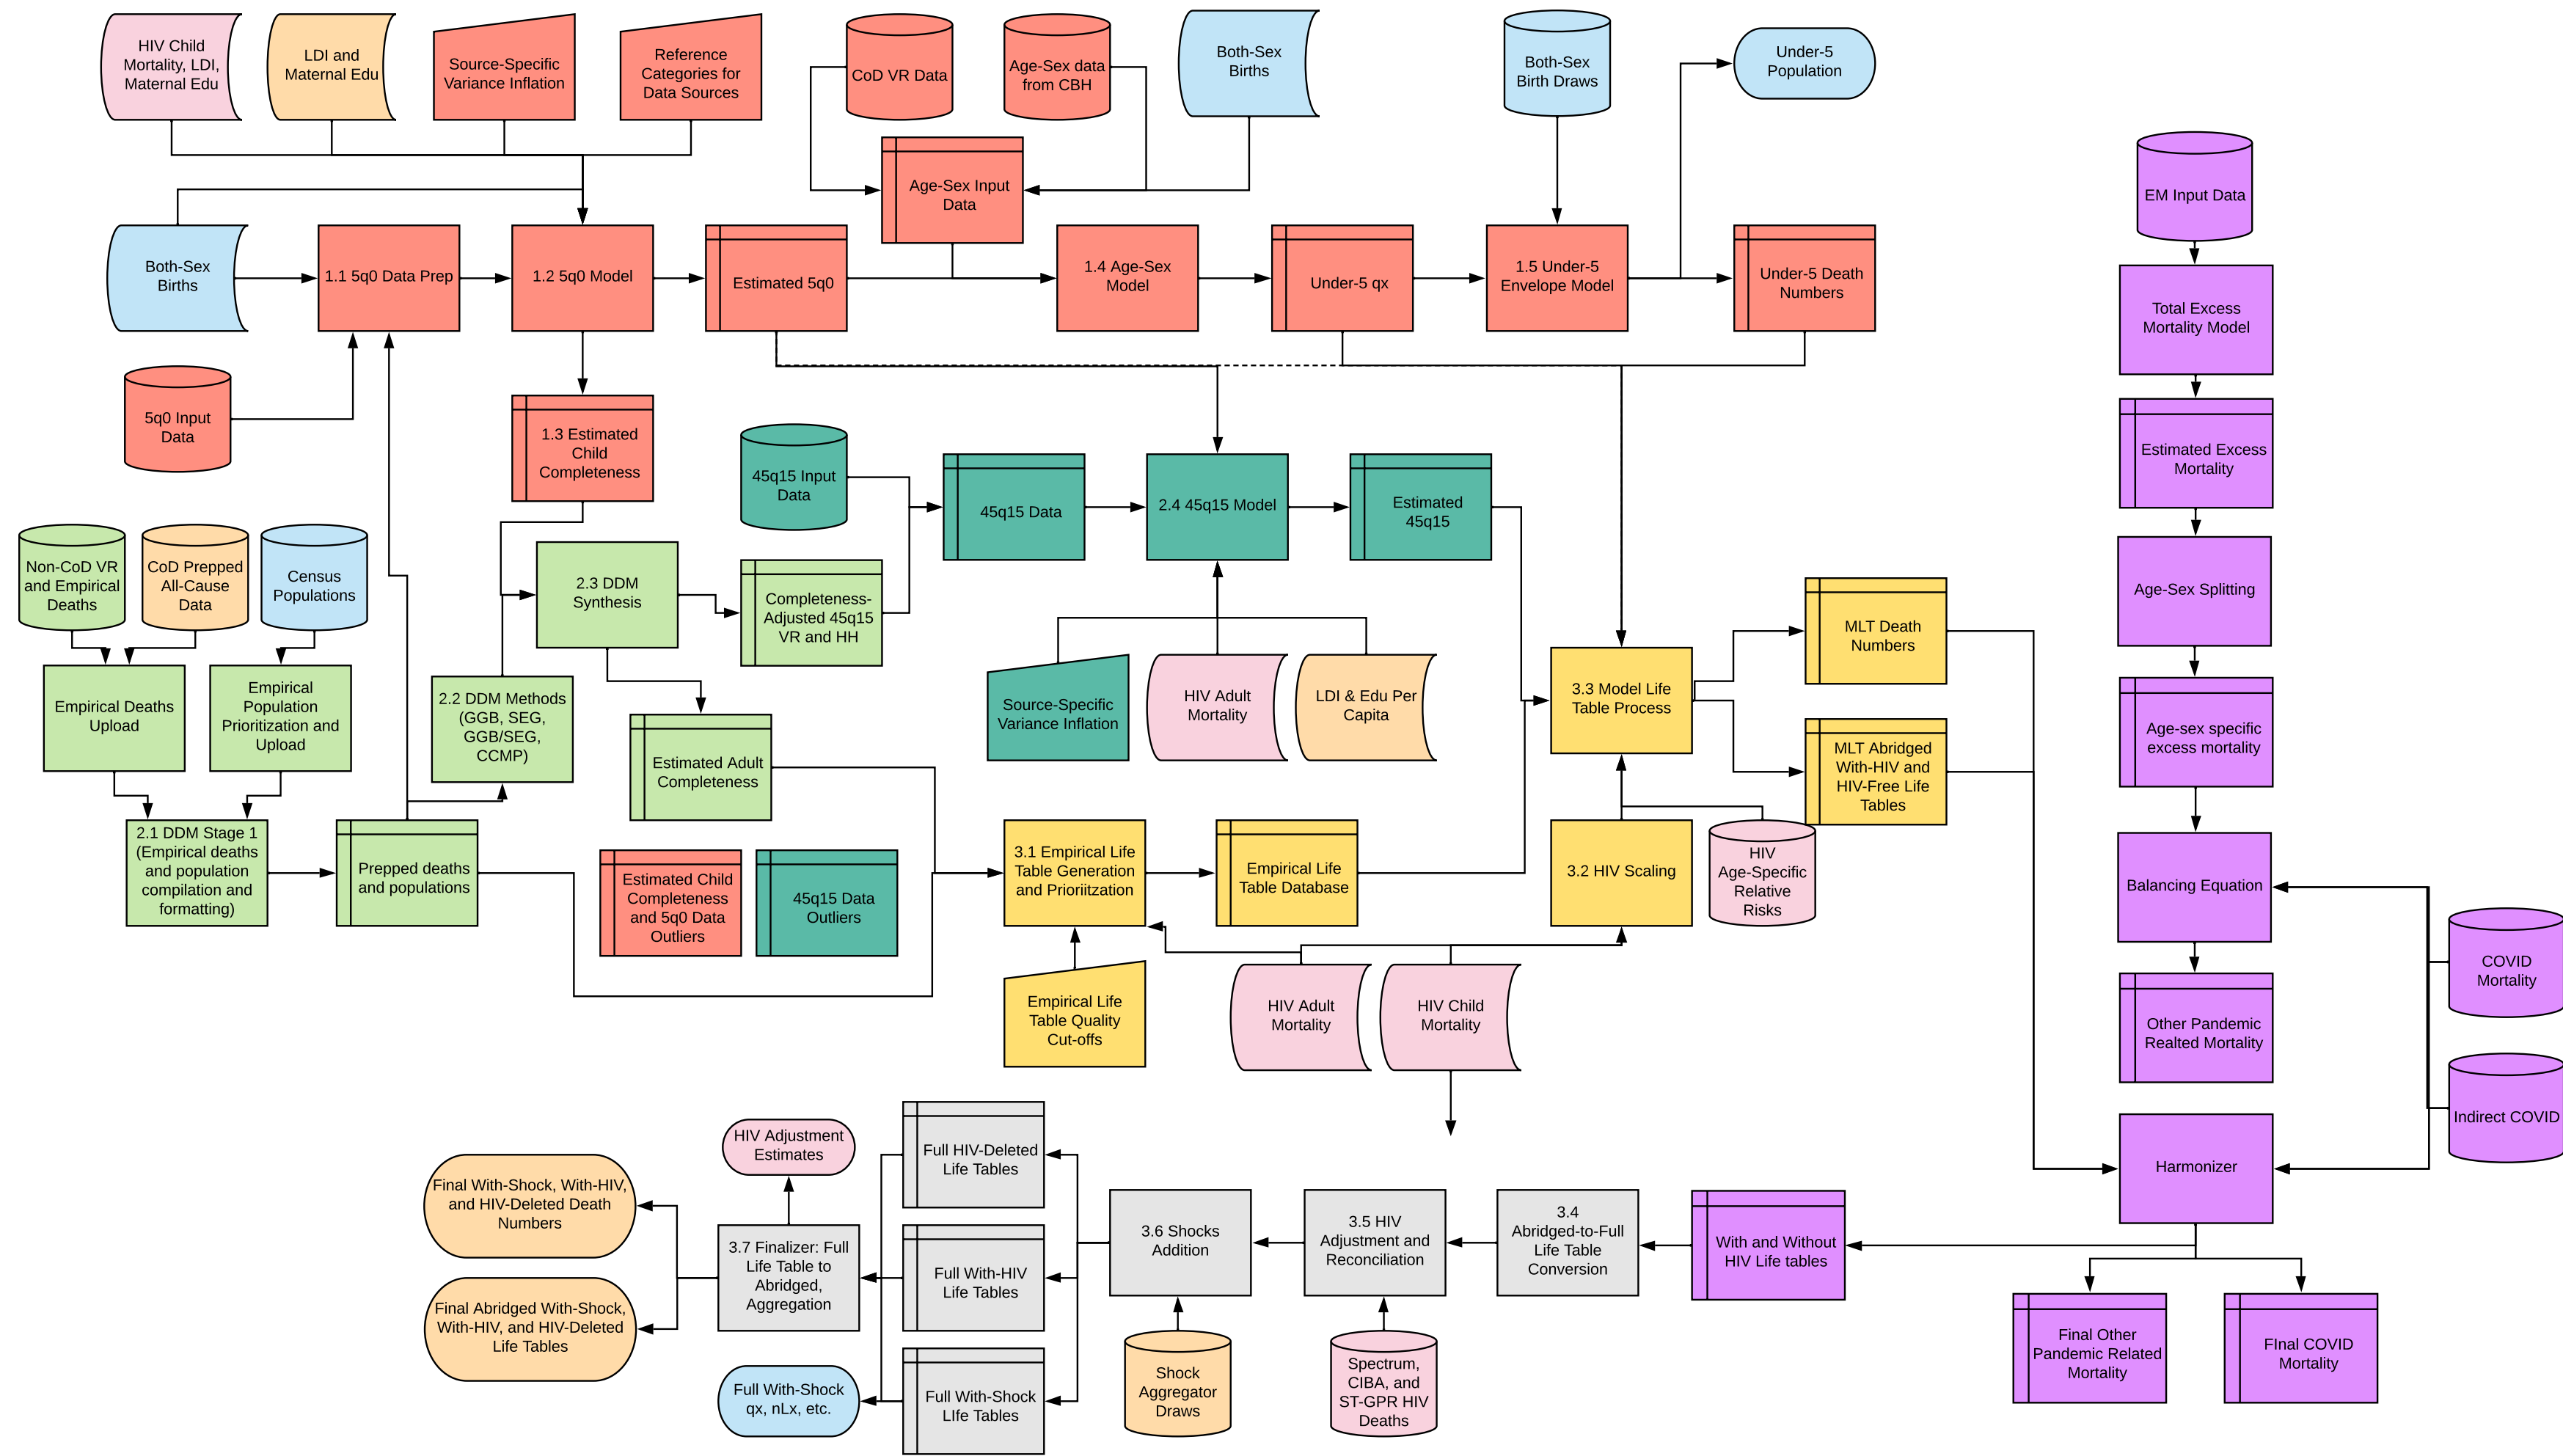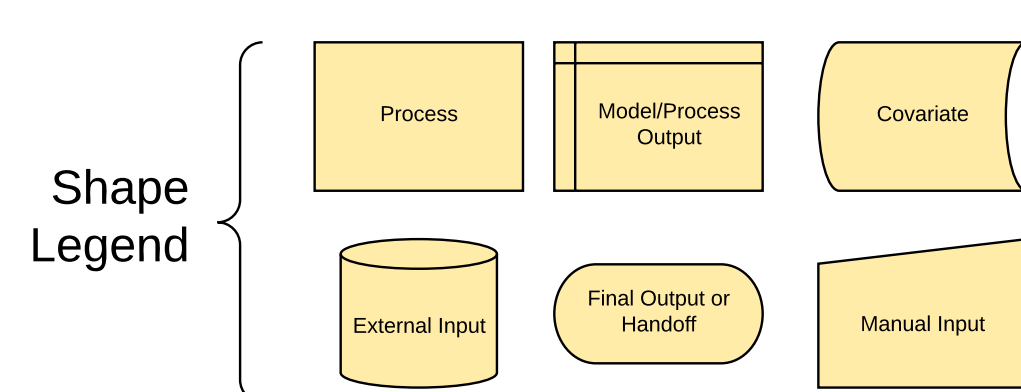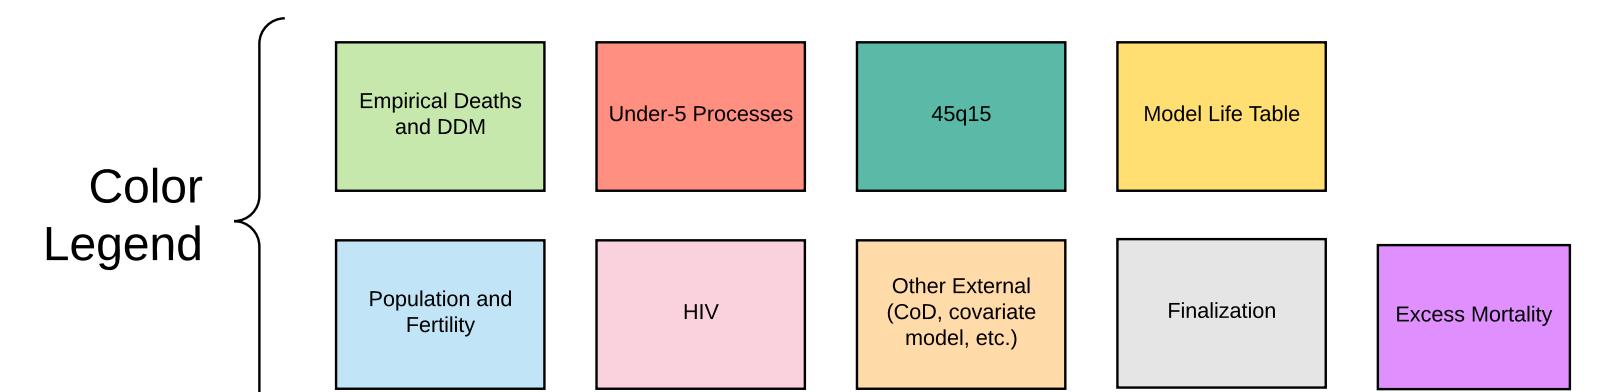

Appendix Figure S2: Estimated completeness of death registration, 1950–2021

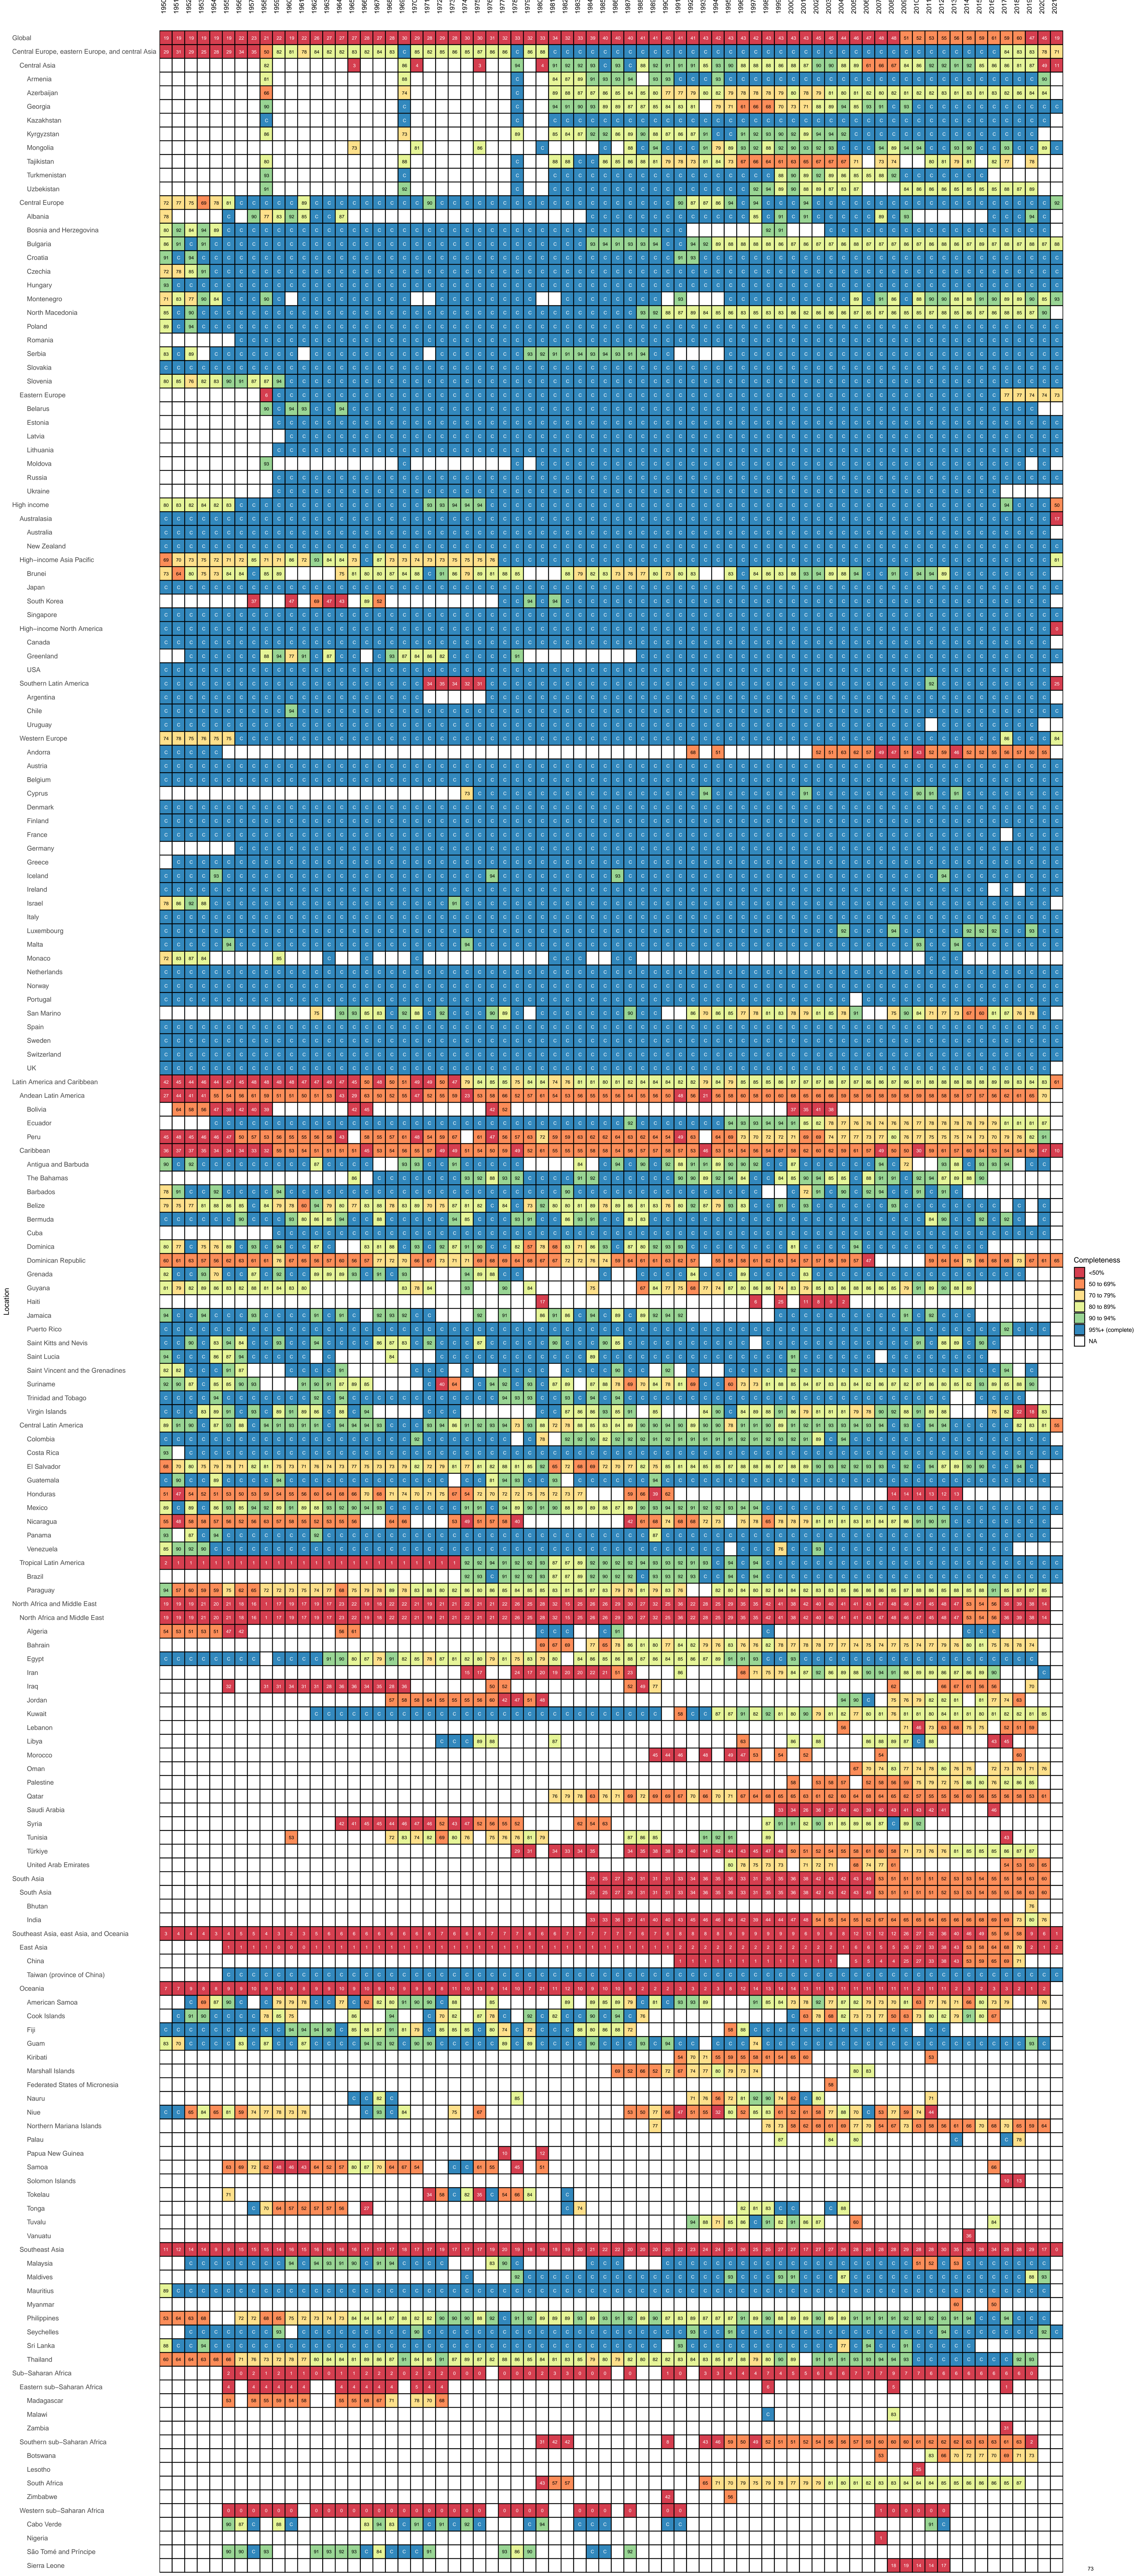

Completeness

- <50%
- 50 to 69%
- 70 to 79%
- 80 to 89%
- 90 to 94%
- 95%+ (complete)
- NA

### Appendix Figure S3: Analytical flowchart for the GBD 2021 fertility estimation process

#### Step 1: Estimate Age-Specific Fertility Rates using Complete Birth Histories & Vital Registrations (Loop 1)

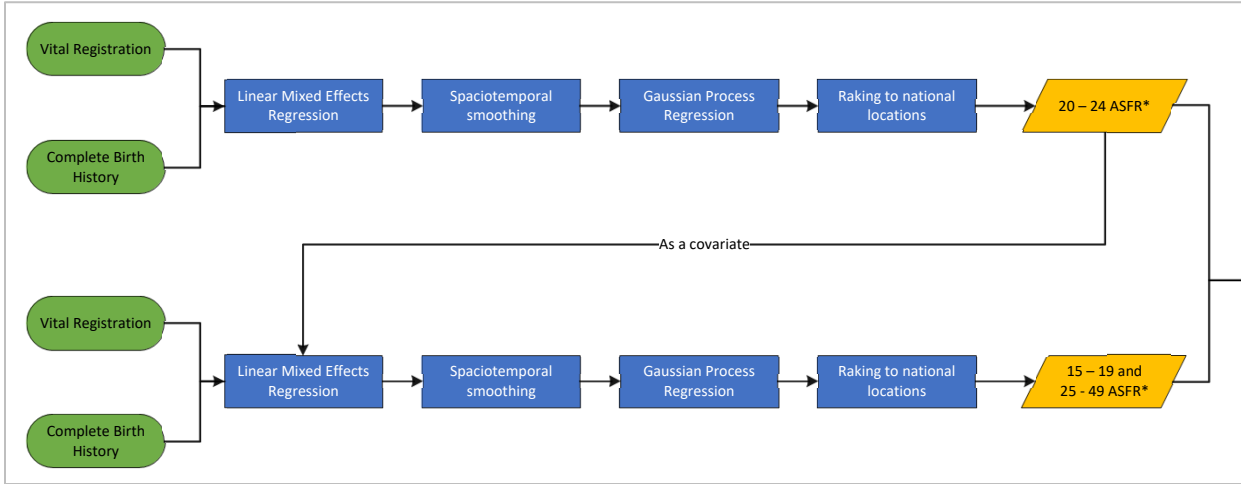

#### Step 2a: Age-split Summary Birth Histories using ASFR Age-Pattern

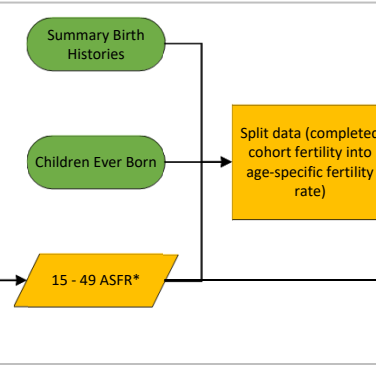

#### Step 2b: Location-split Registered Births

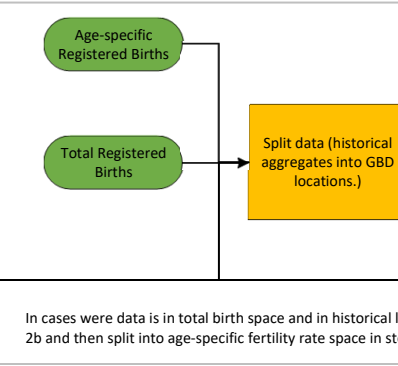

#### Step 2c: Remaining Total Birth Registry data split.

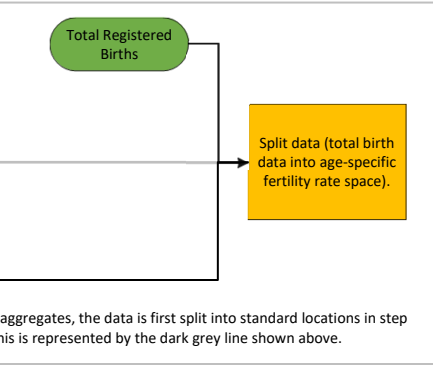

In cases where data is in total birth space and in historical location aggregates, the data is first split into standard locations in step 2b and then split into age-specific fertility rate space in step 2c. This is represented by the dark grey line shown above.

#### Step 3: Estimate Age-Specific Fertility Rates using Complete Birth Histories and Split Data (Loop 2)

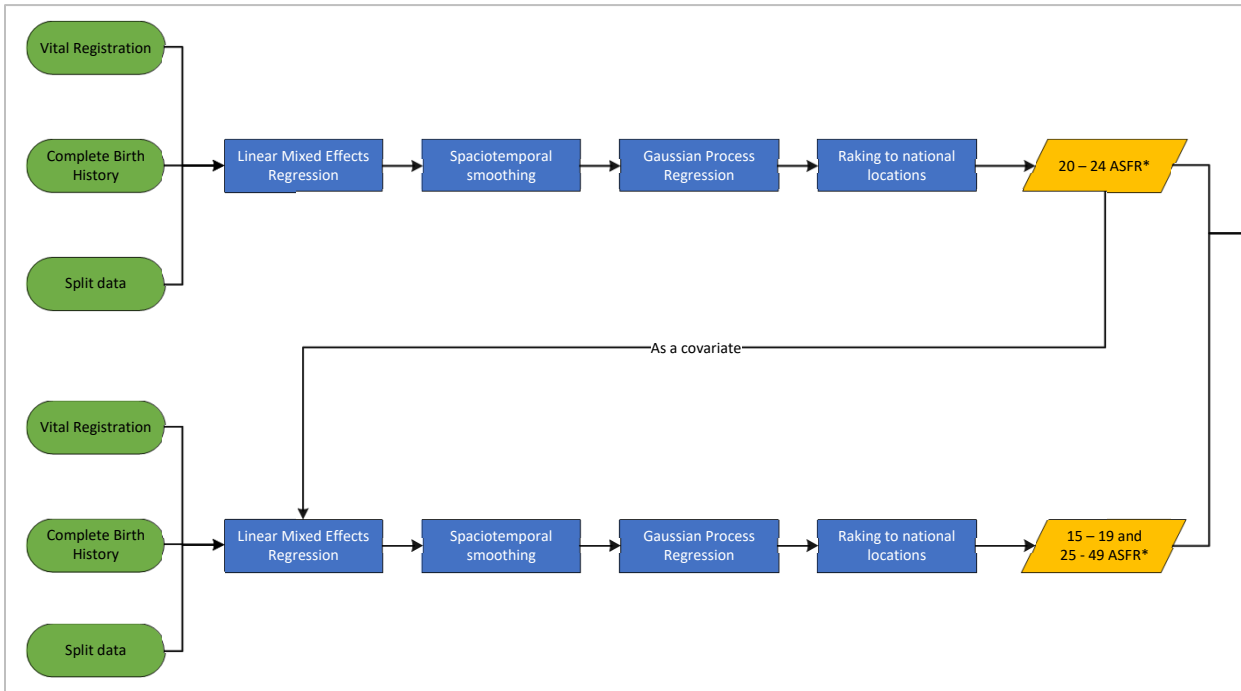

#### Step 4: Estimate 10 – 14 and 50 – 54 Age-Specific Fertility Rates

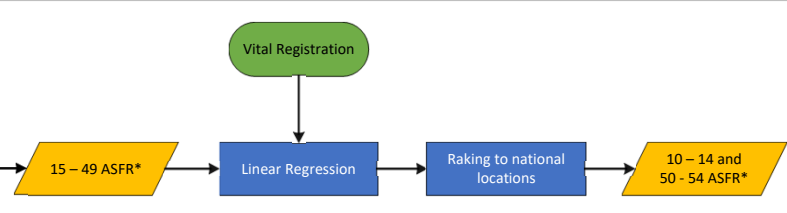

#### Step 5: Use 10 – 54 ASFR to output TFR, ASFR (1 year bins), and Live Births

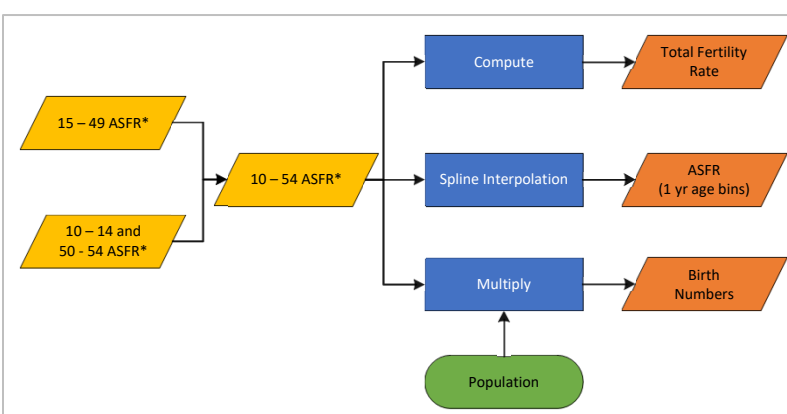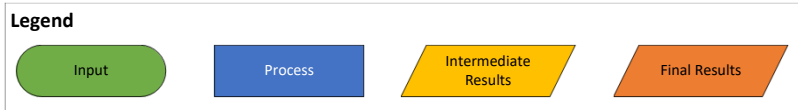

\*All intermediate ASFR estimates are computed in 5 year age-bins until the spline interpolation in step 5 of the model.



# Appendix Figure S4: Analytical flowchart for the GBD 2021 population estimation process

## Step 1: Population Census and Registry Data Standardization

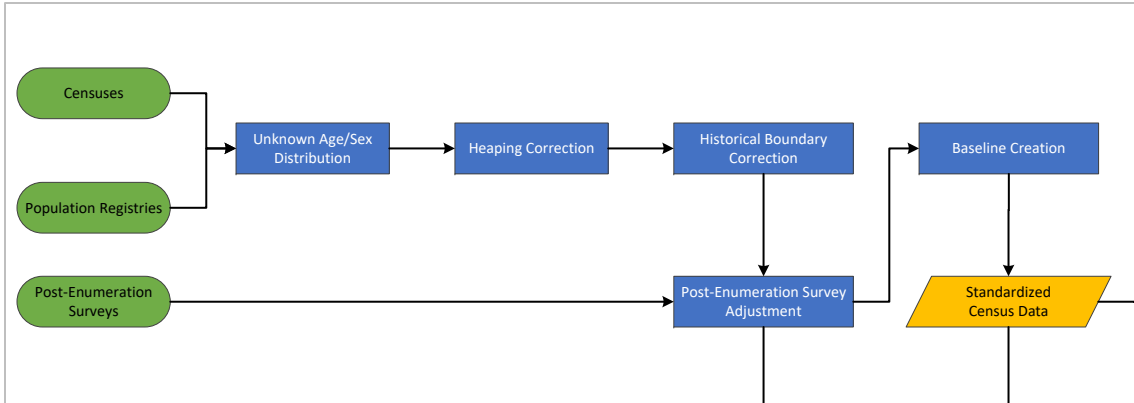

## Step 3: Population modeling using Cohort Component Method of Population Projection

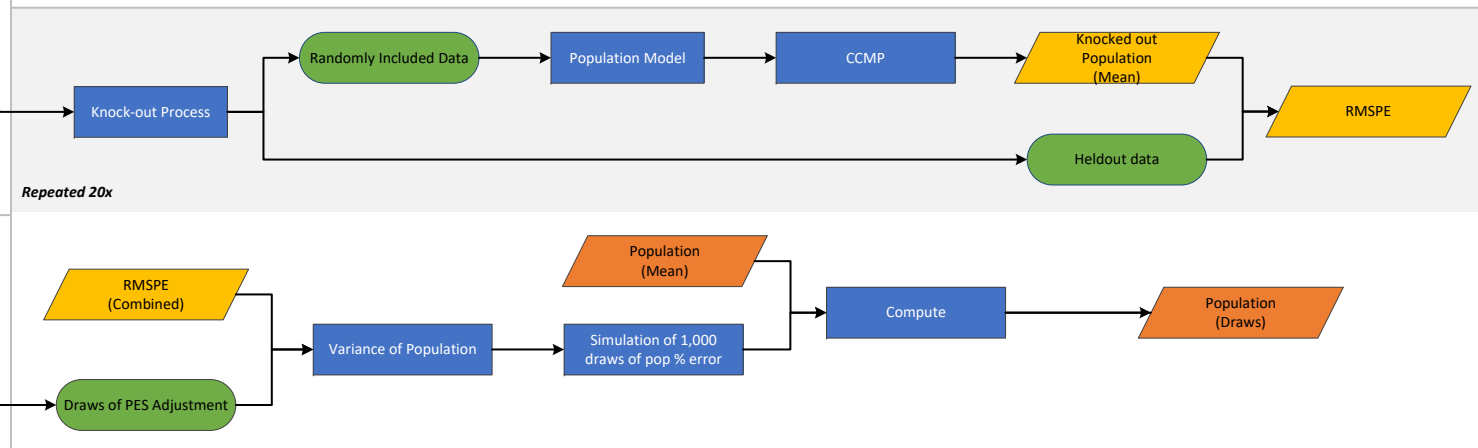

## Step 2: Input Development for GBD Bayesian Demographic Balancing Model

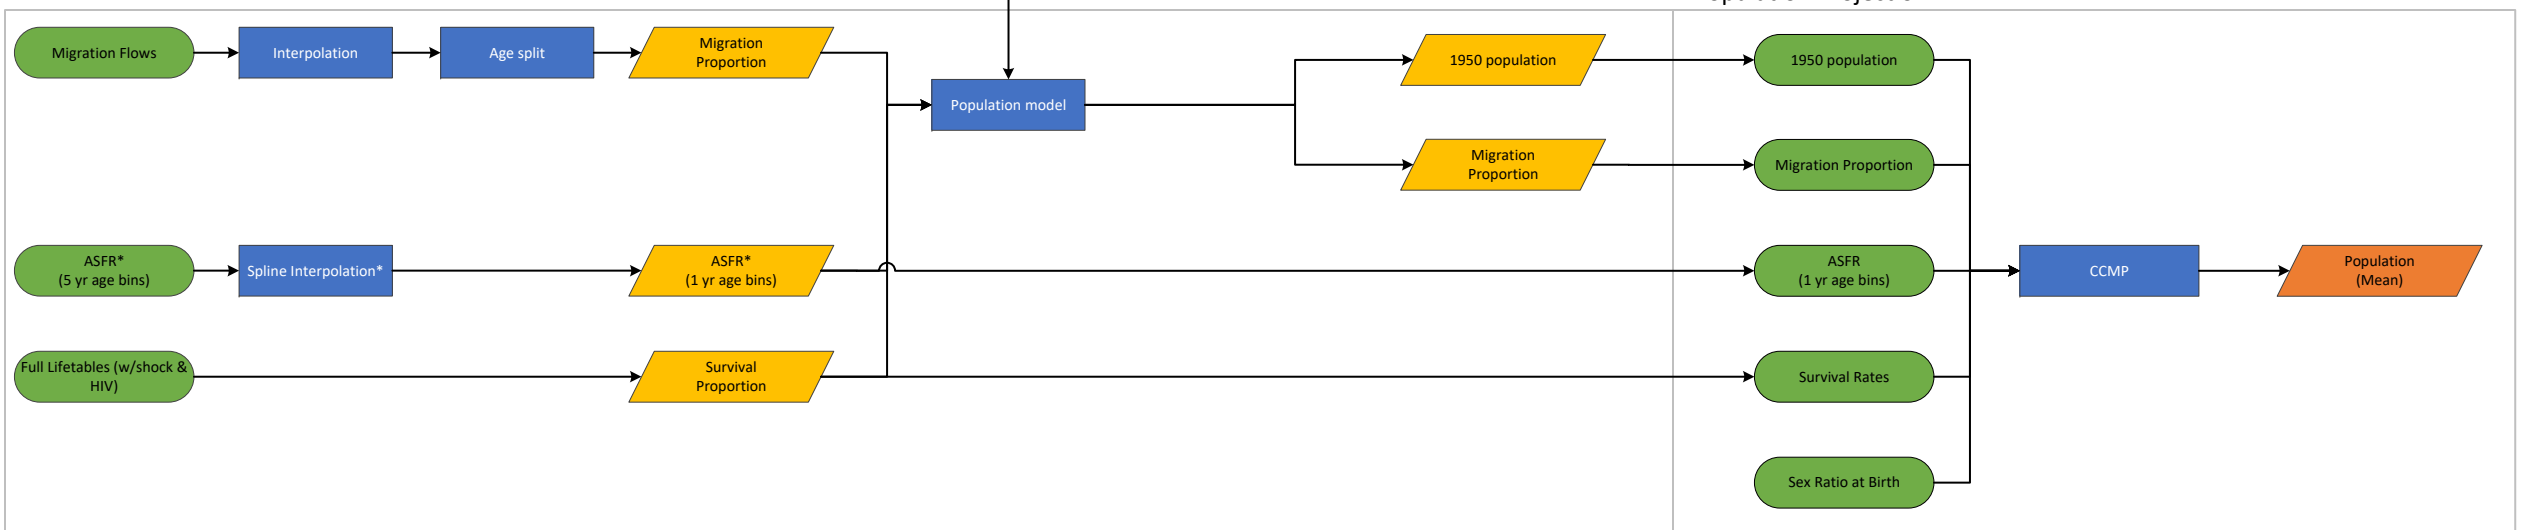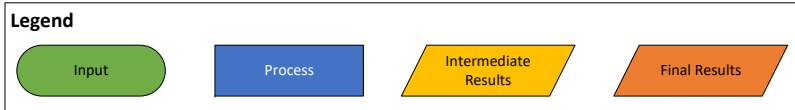

\* These steps occur in at the end of fertility model (see Step 5 in the fertility analytical flowchart). Included here for comprehensiveness, colored according to it's relationship to the population process

Appendix Figure S5: Census and registry availability by location and year  
Central Europe, Eastern Europe, and Central Asia

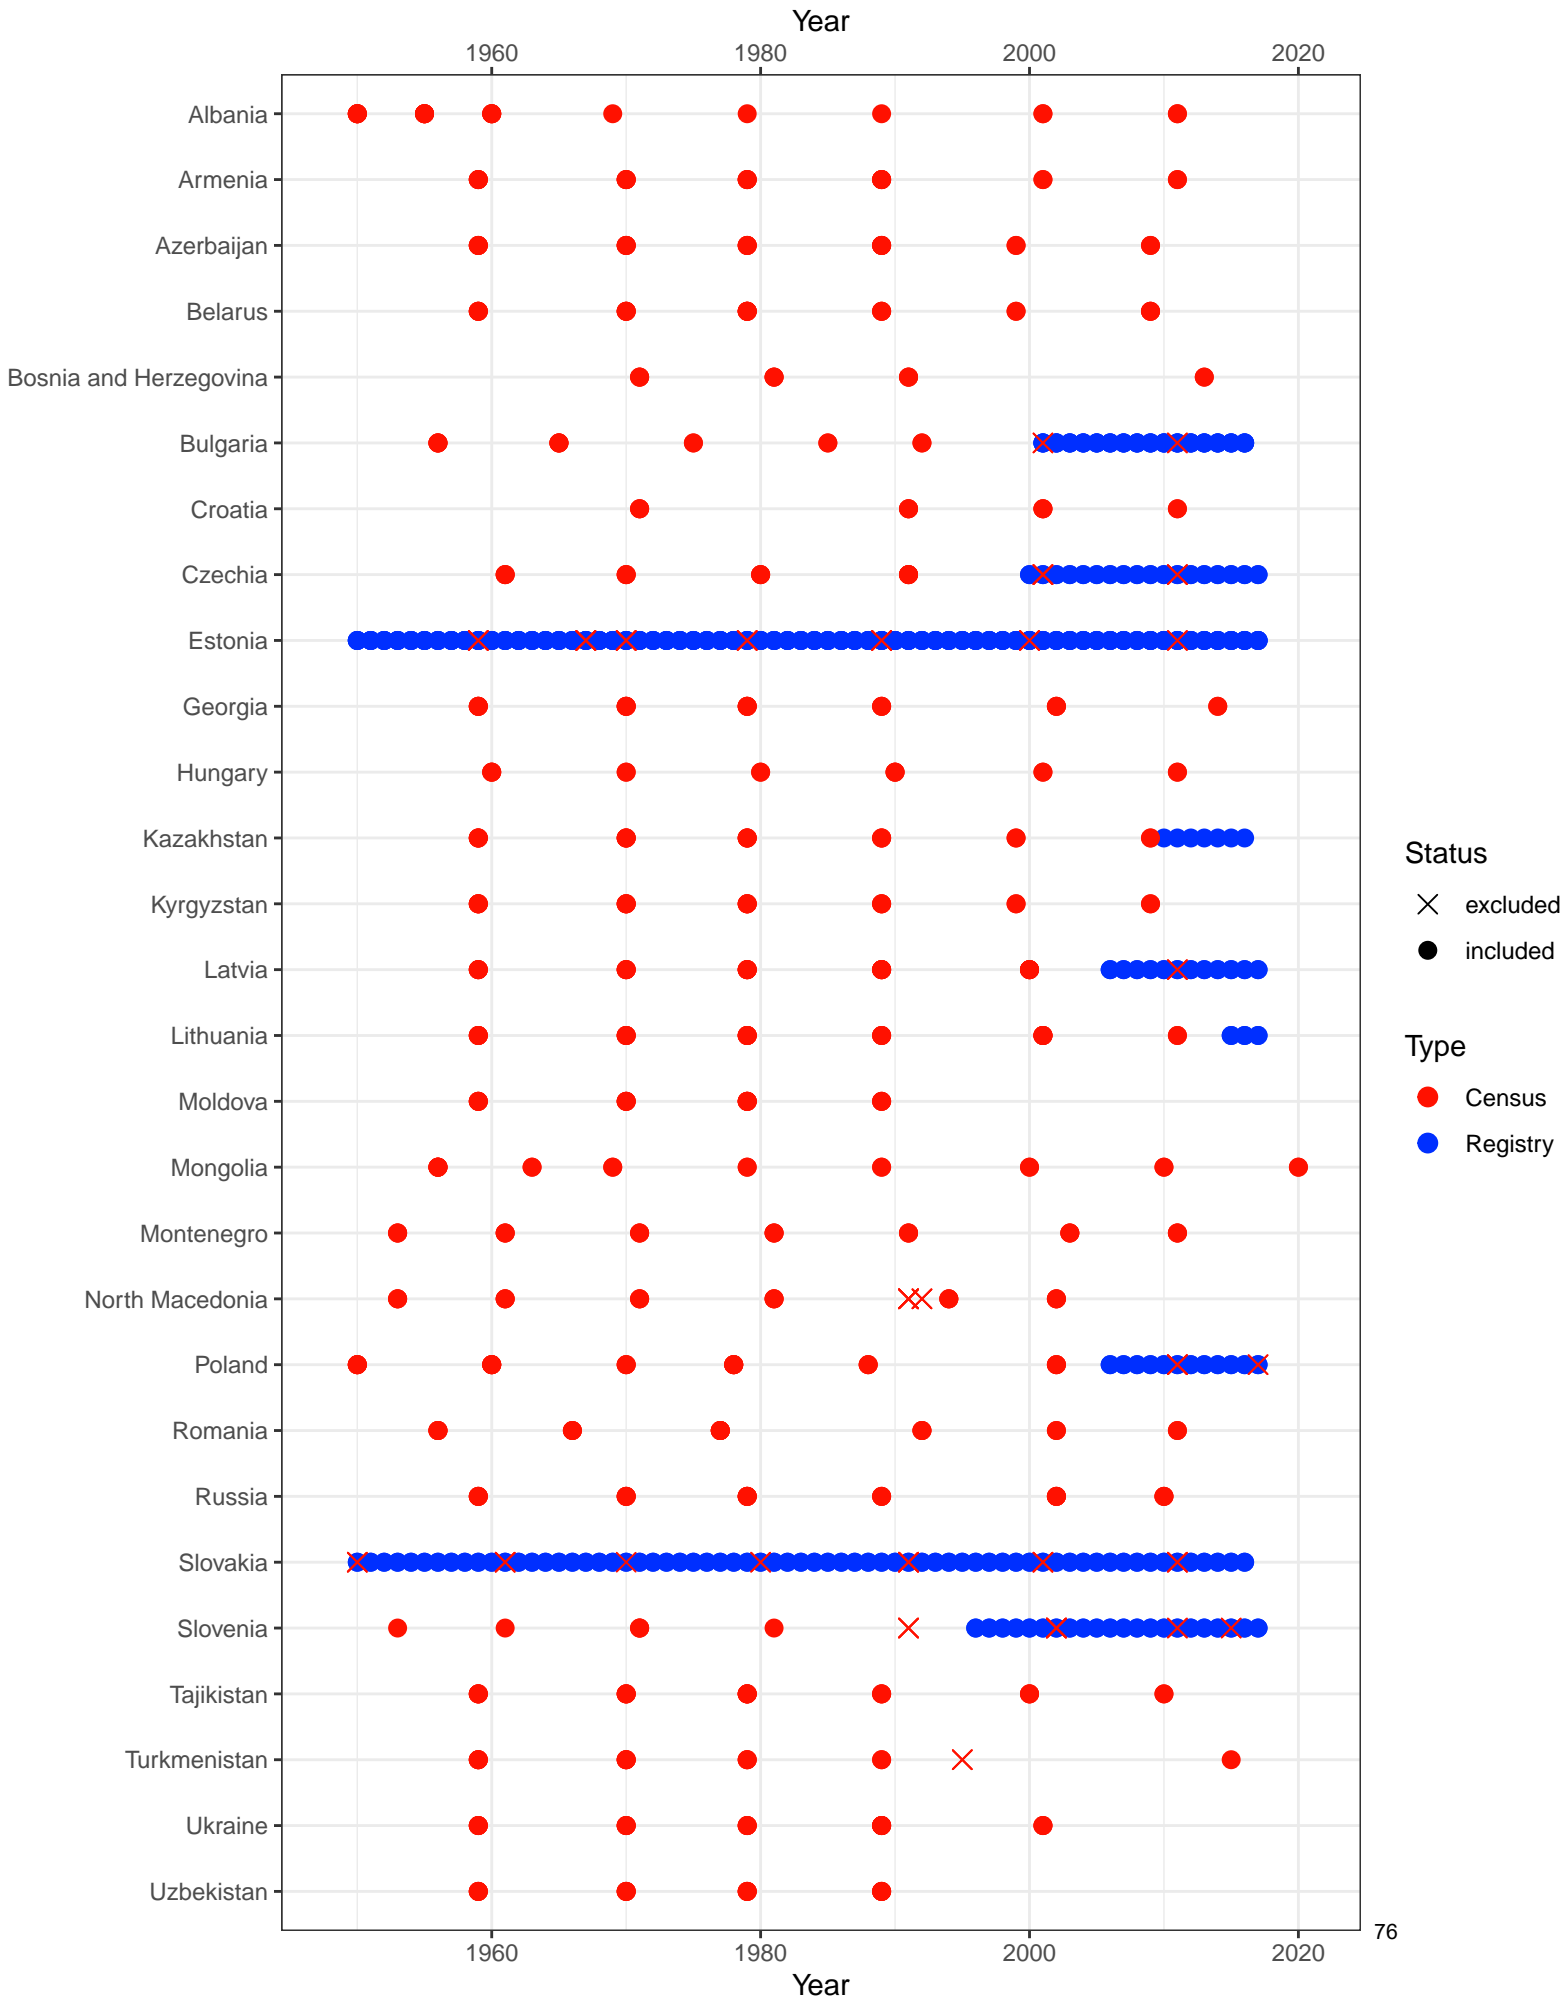

# High-income

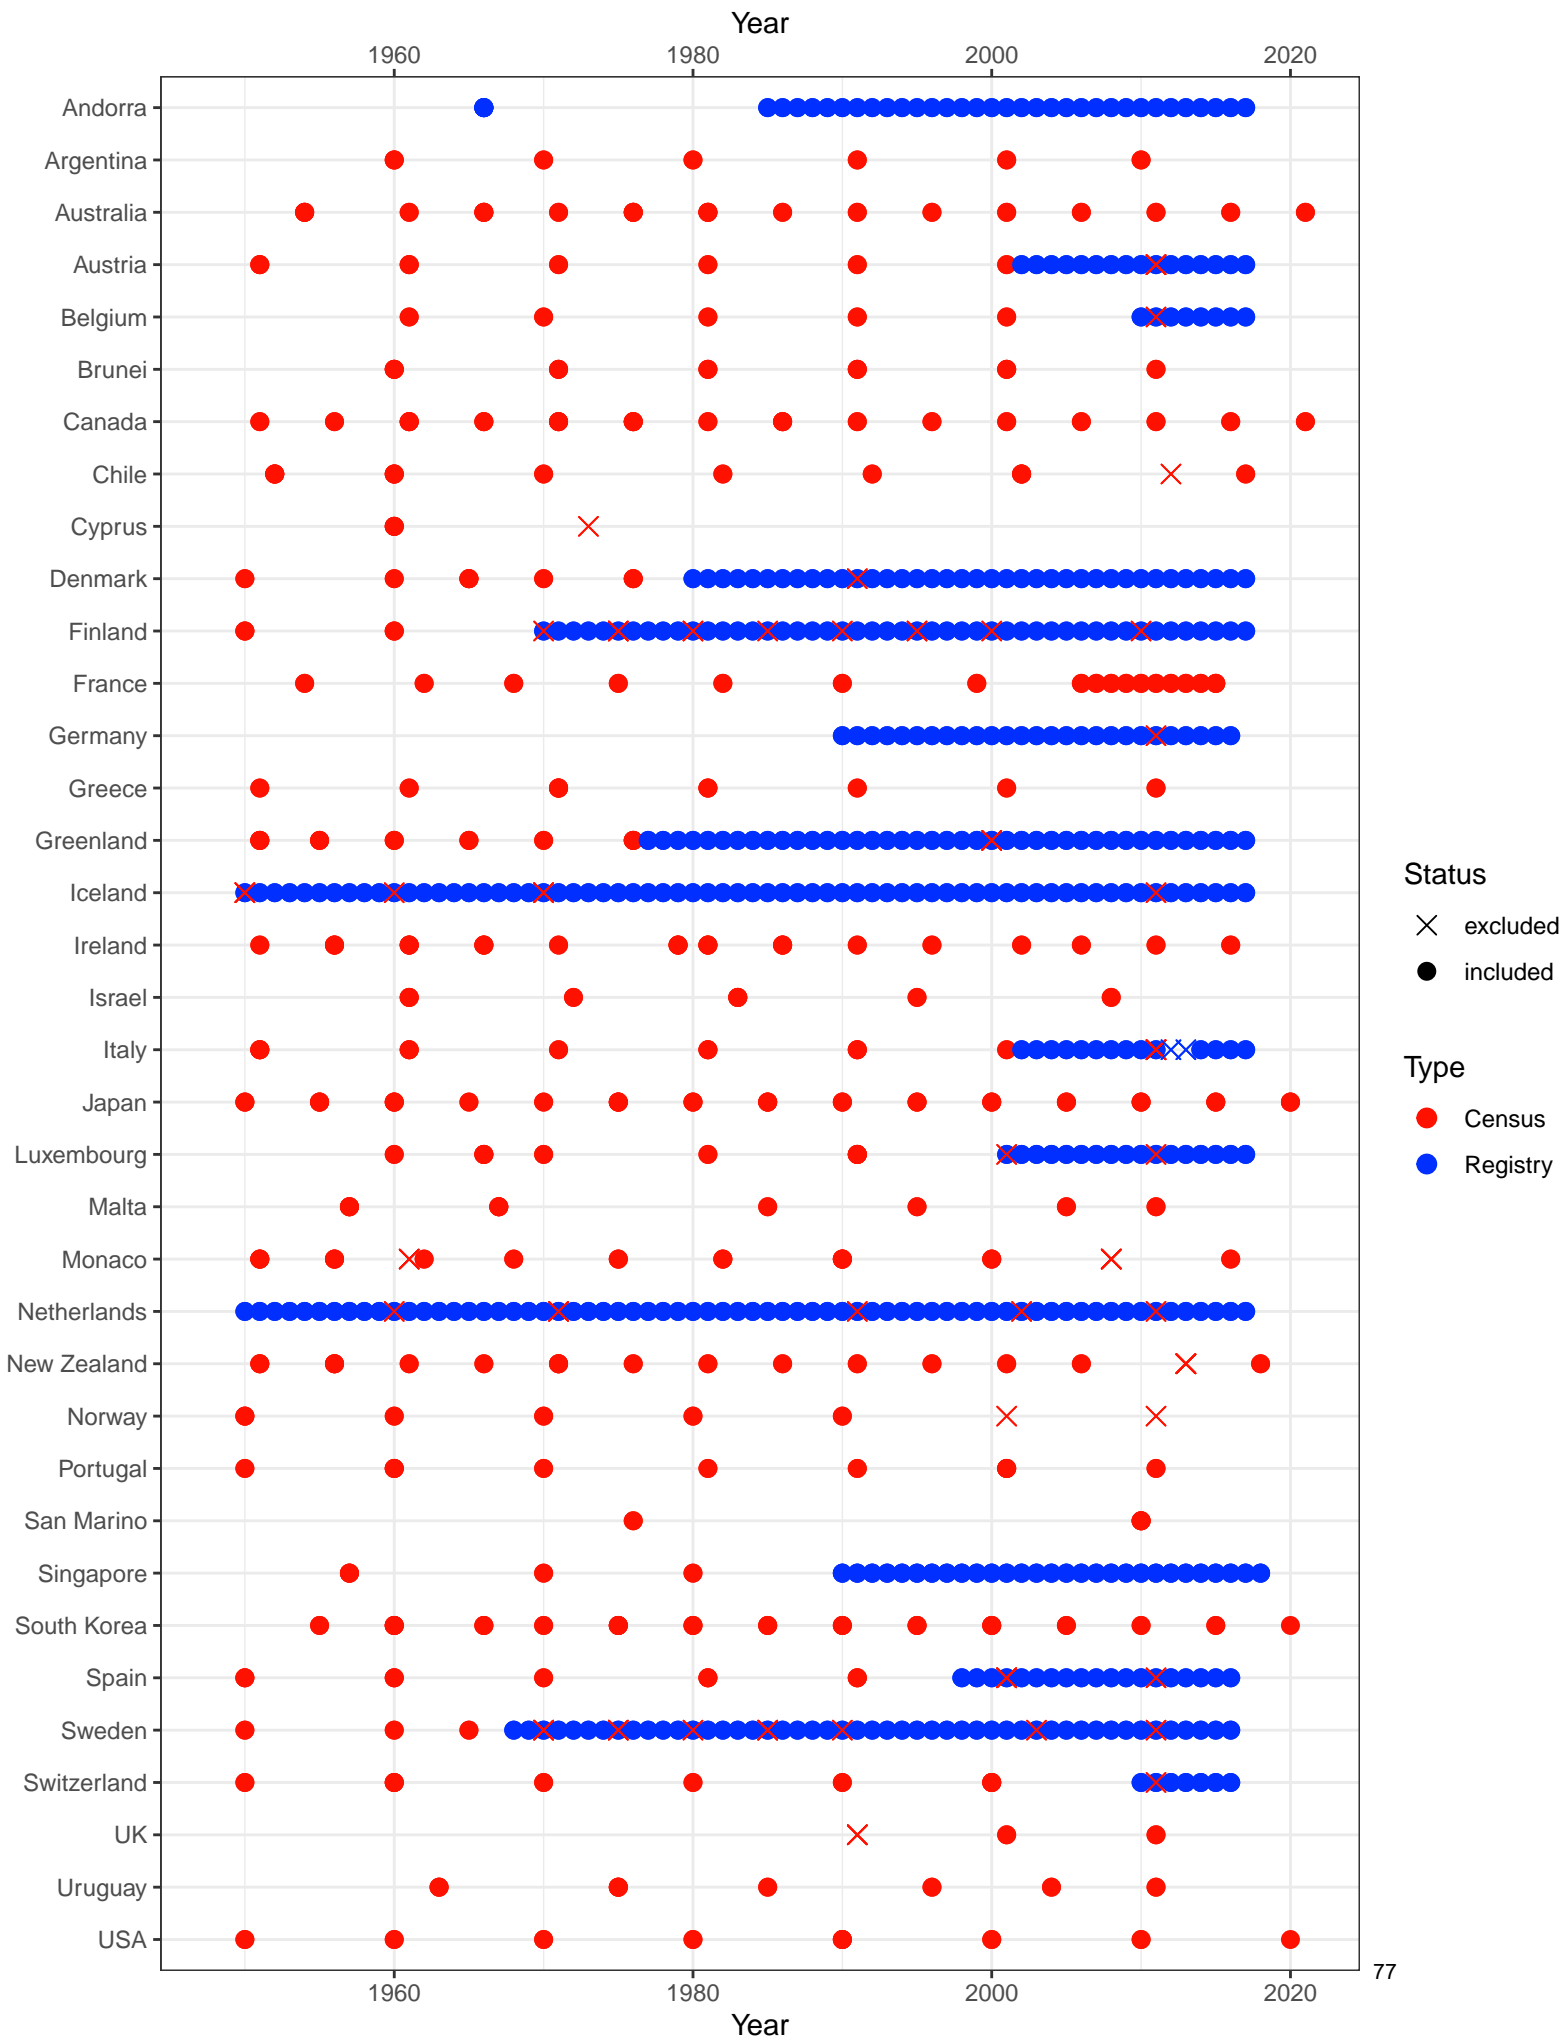

# Latin America and Caribbean

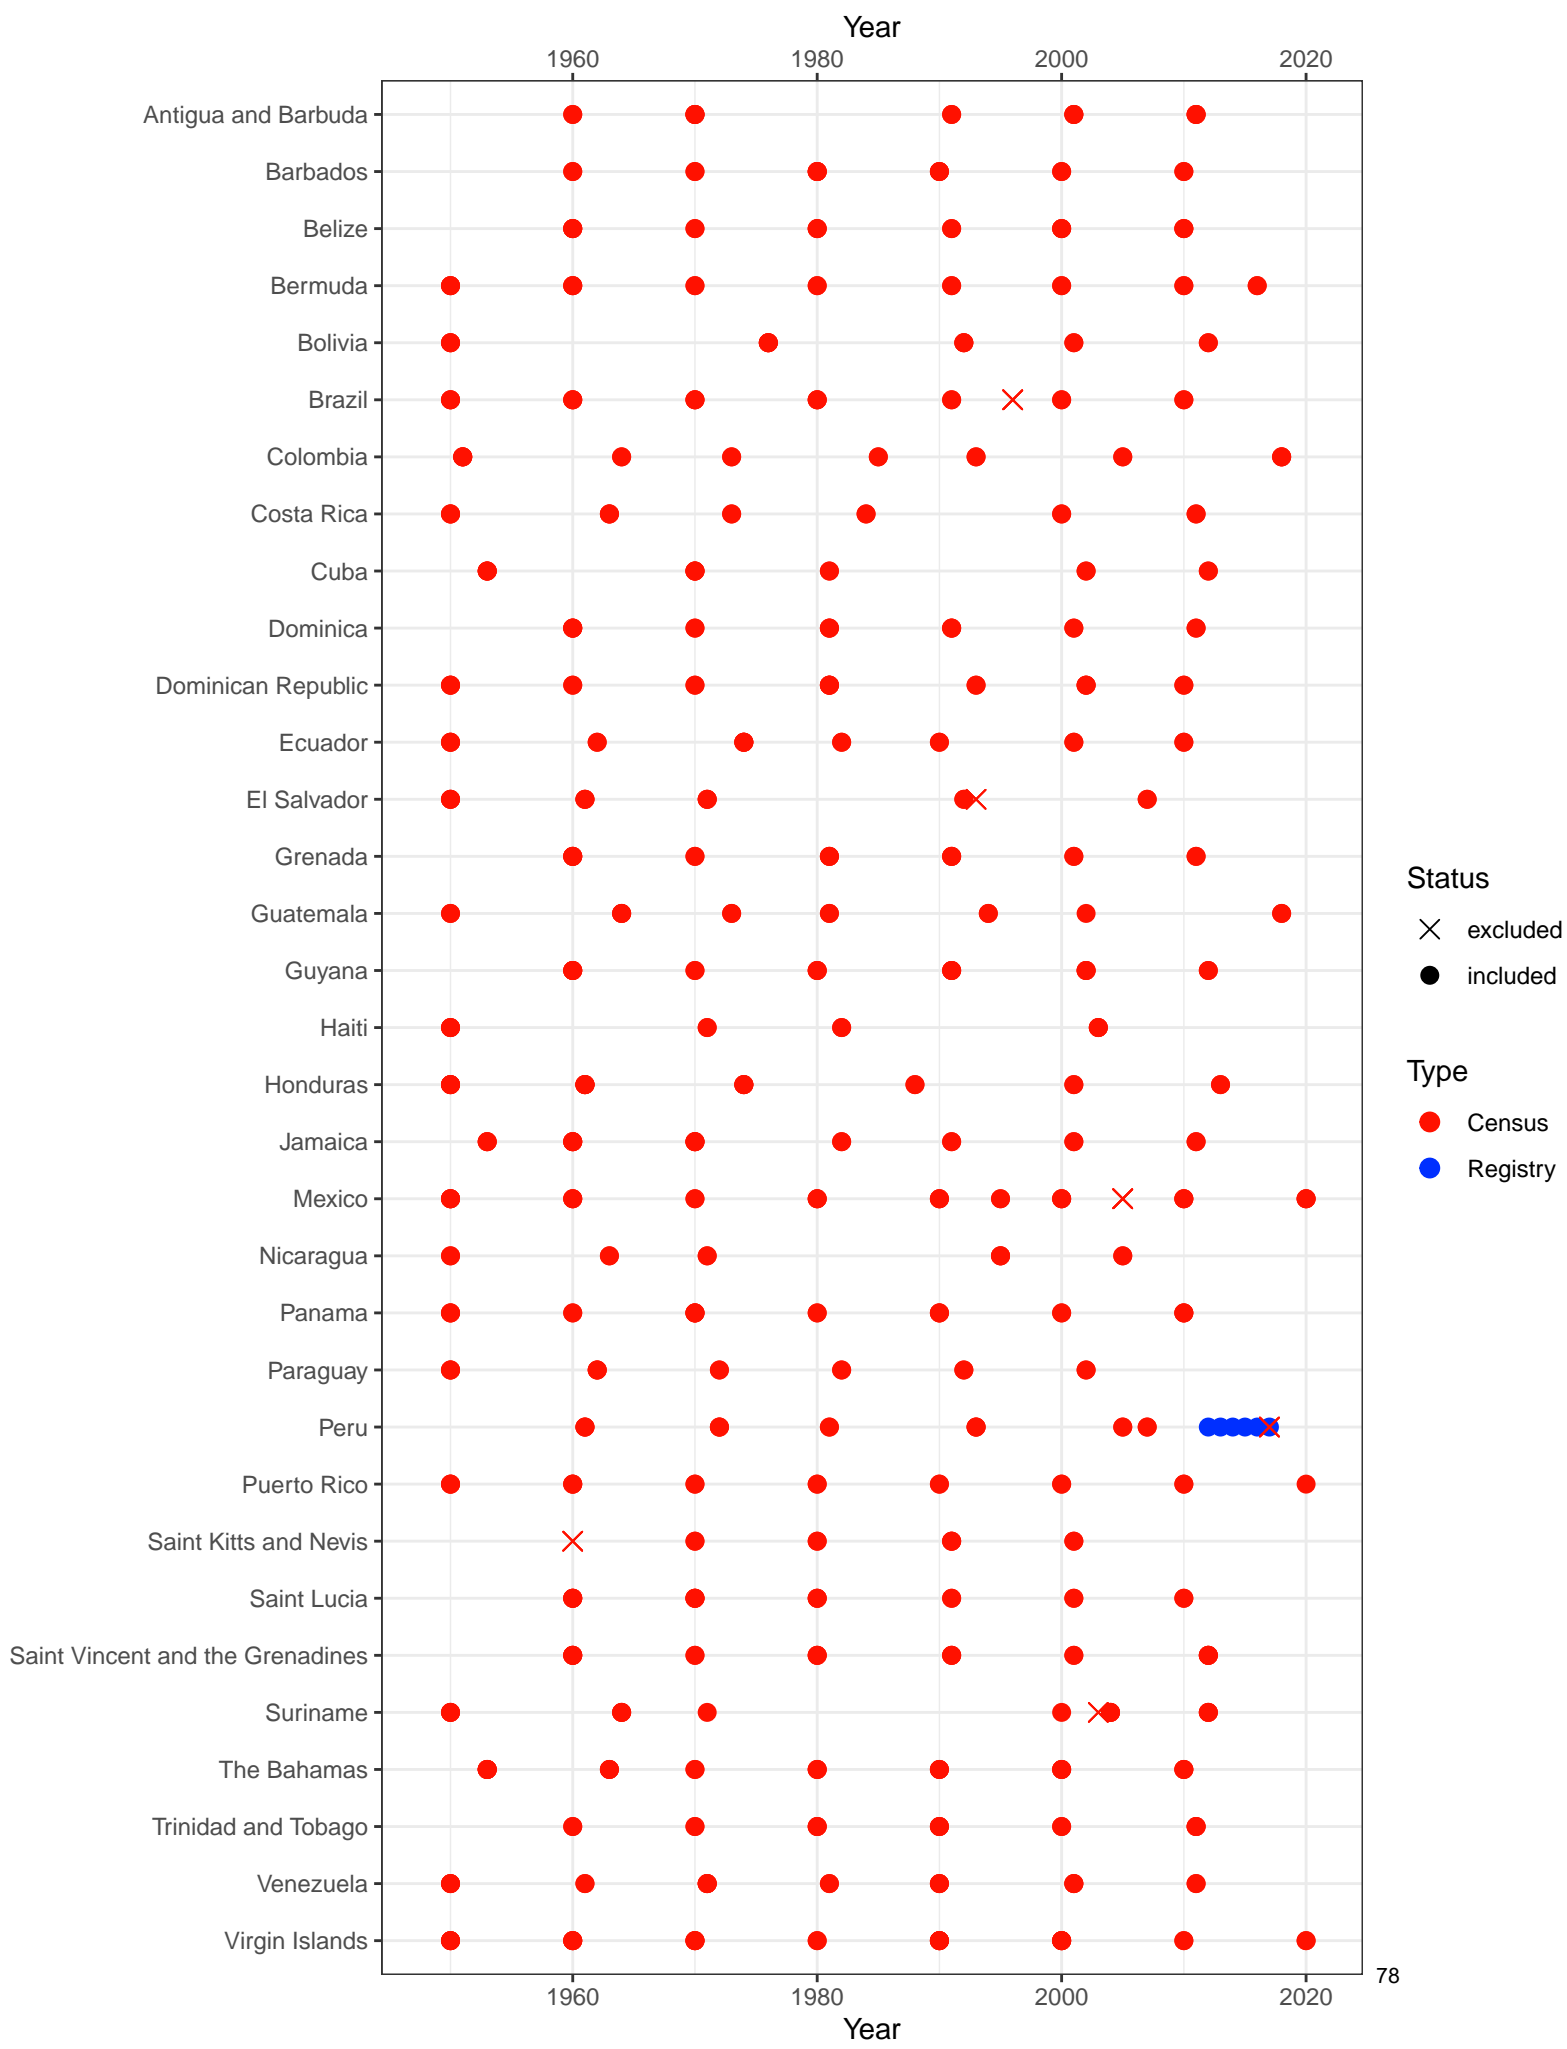

# North Africa and Middle East

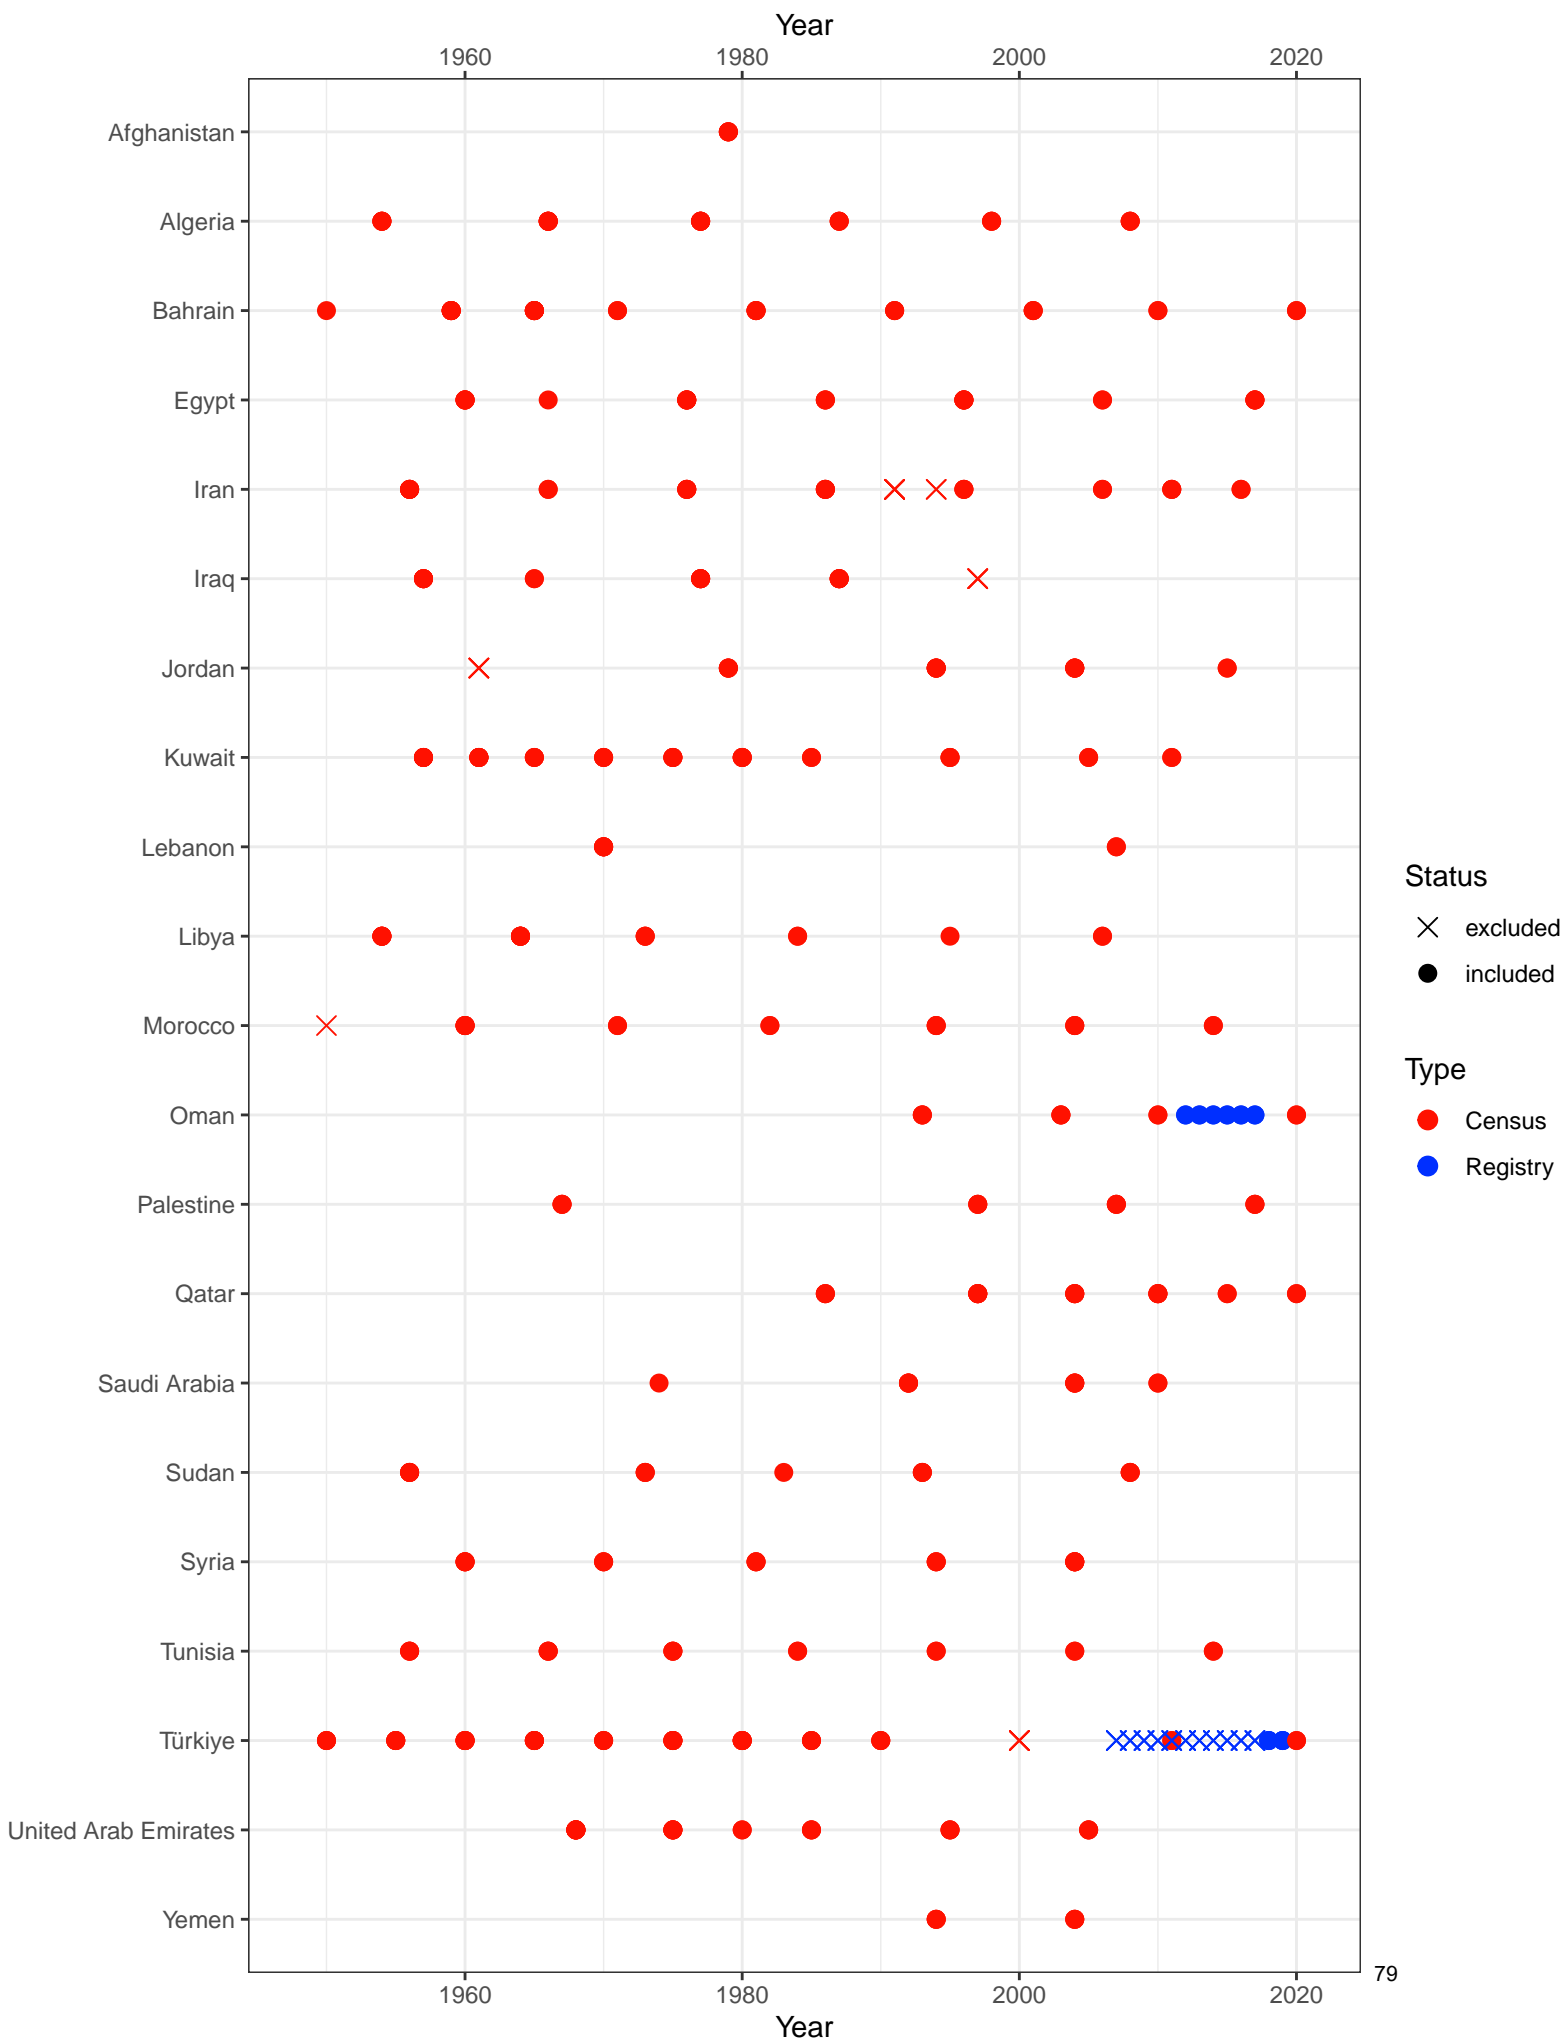



# South Asia

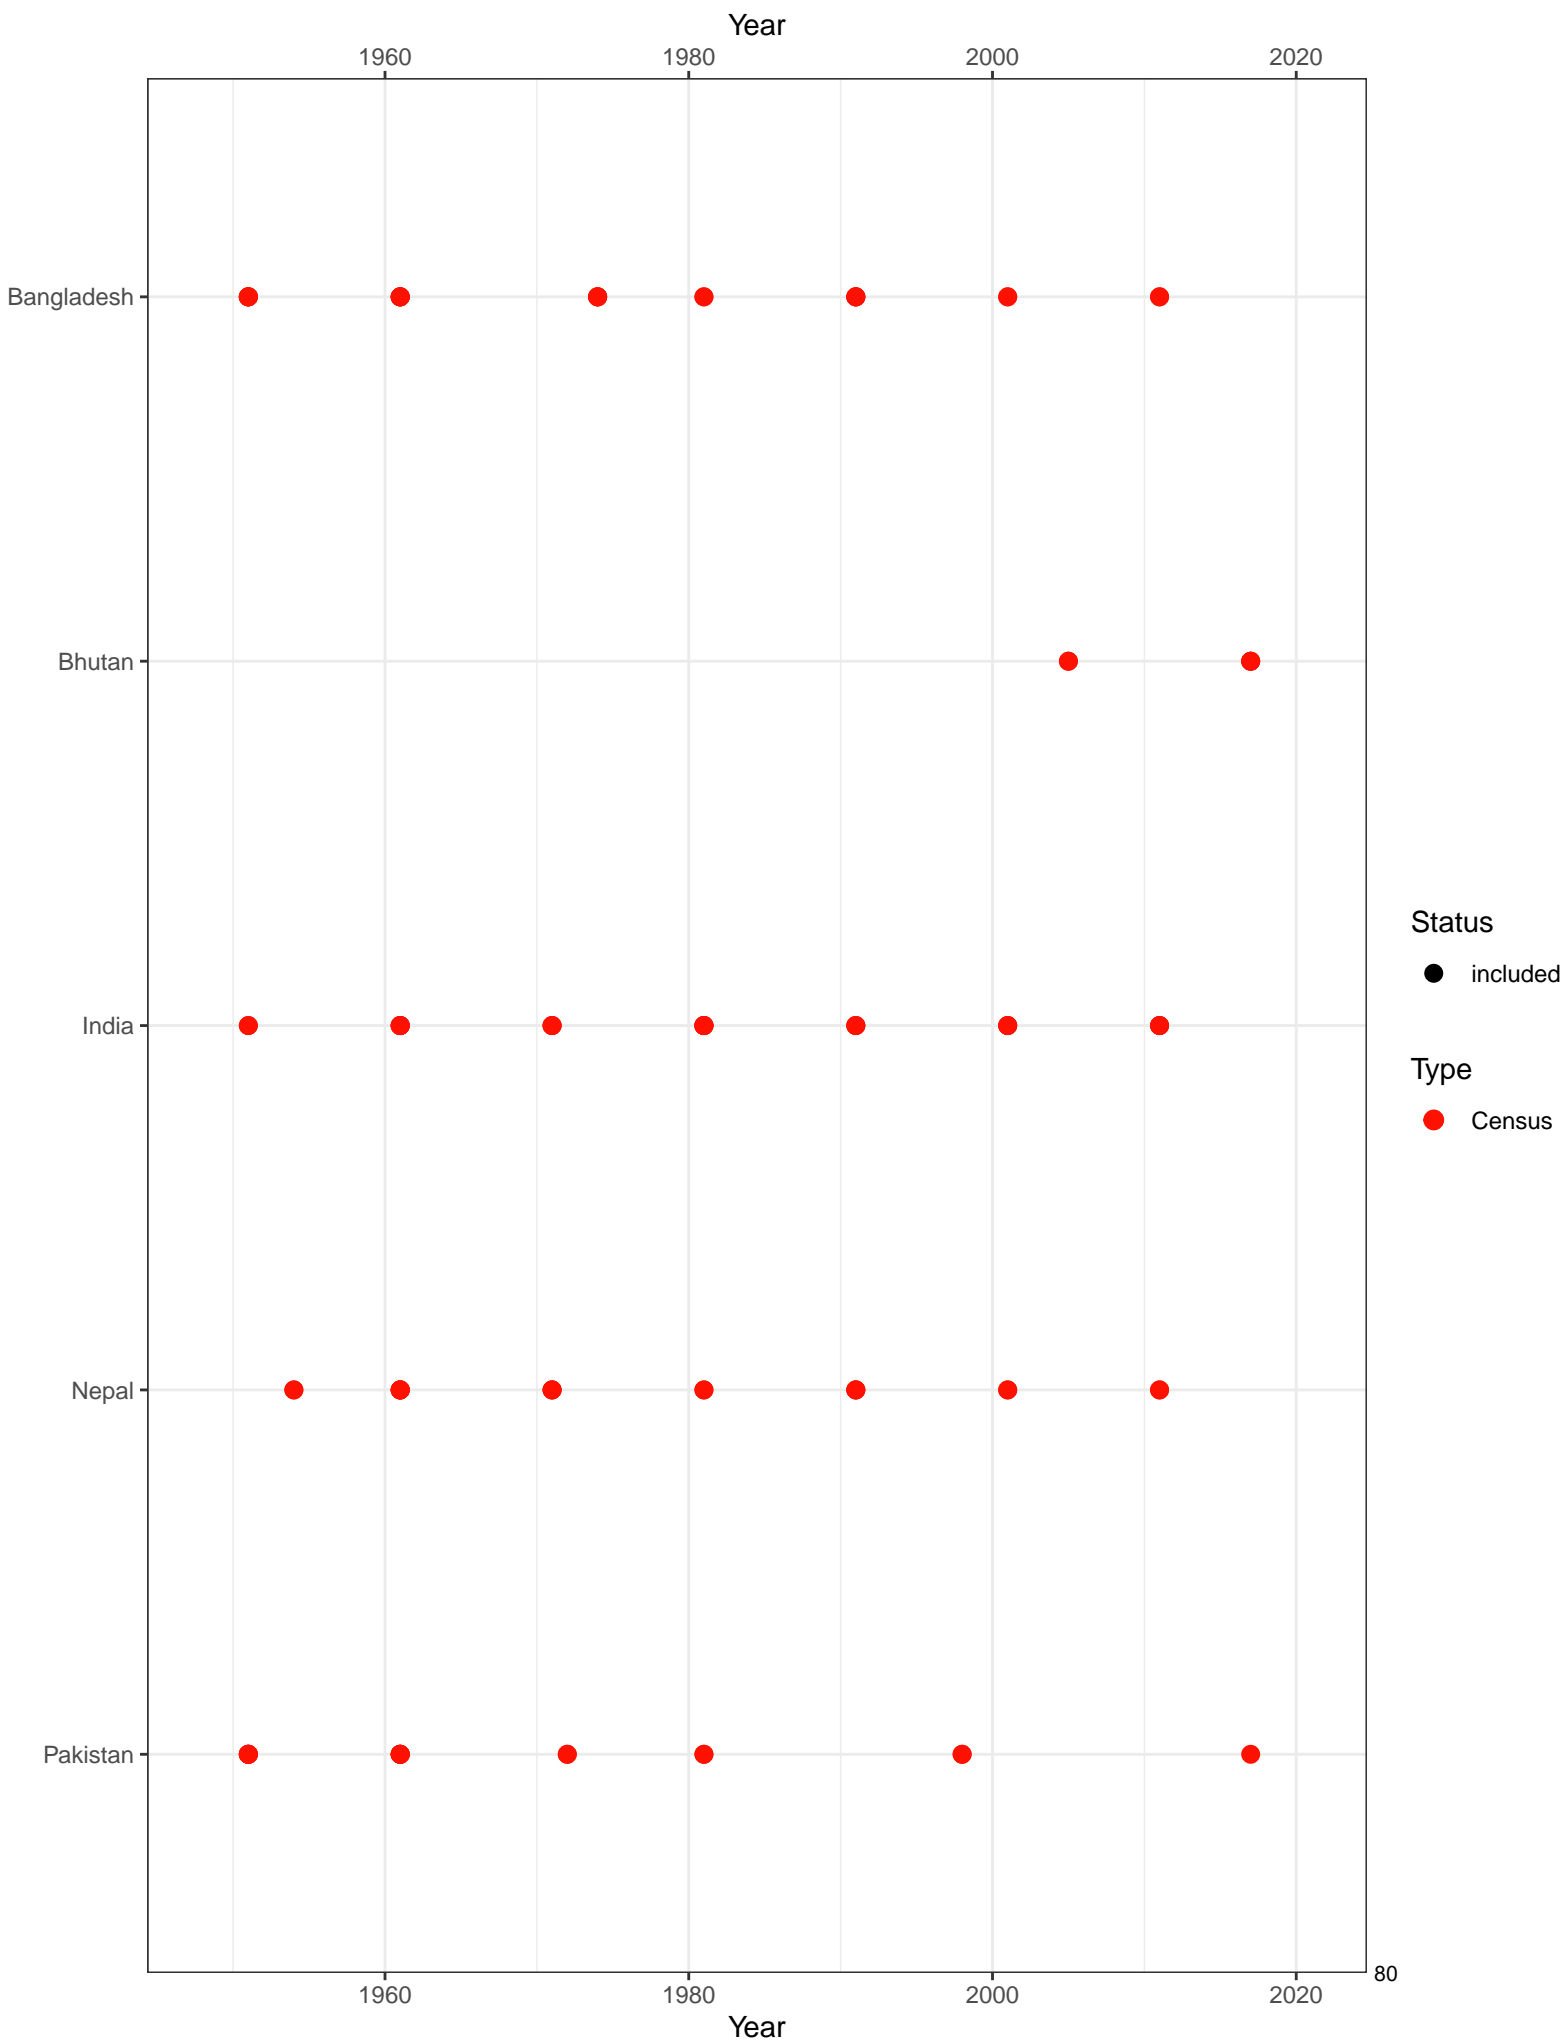

# Southeast Asia, East Asia, and Oceania

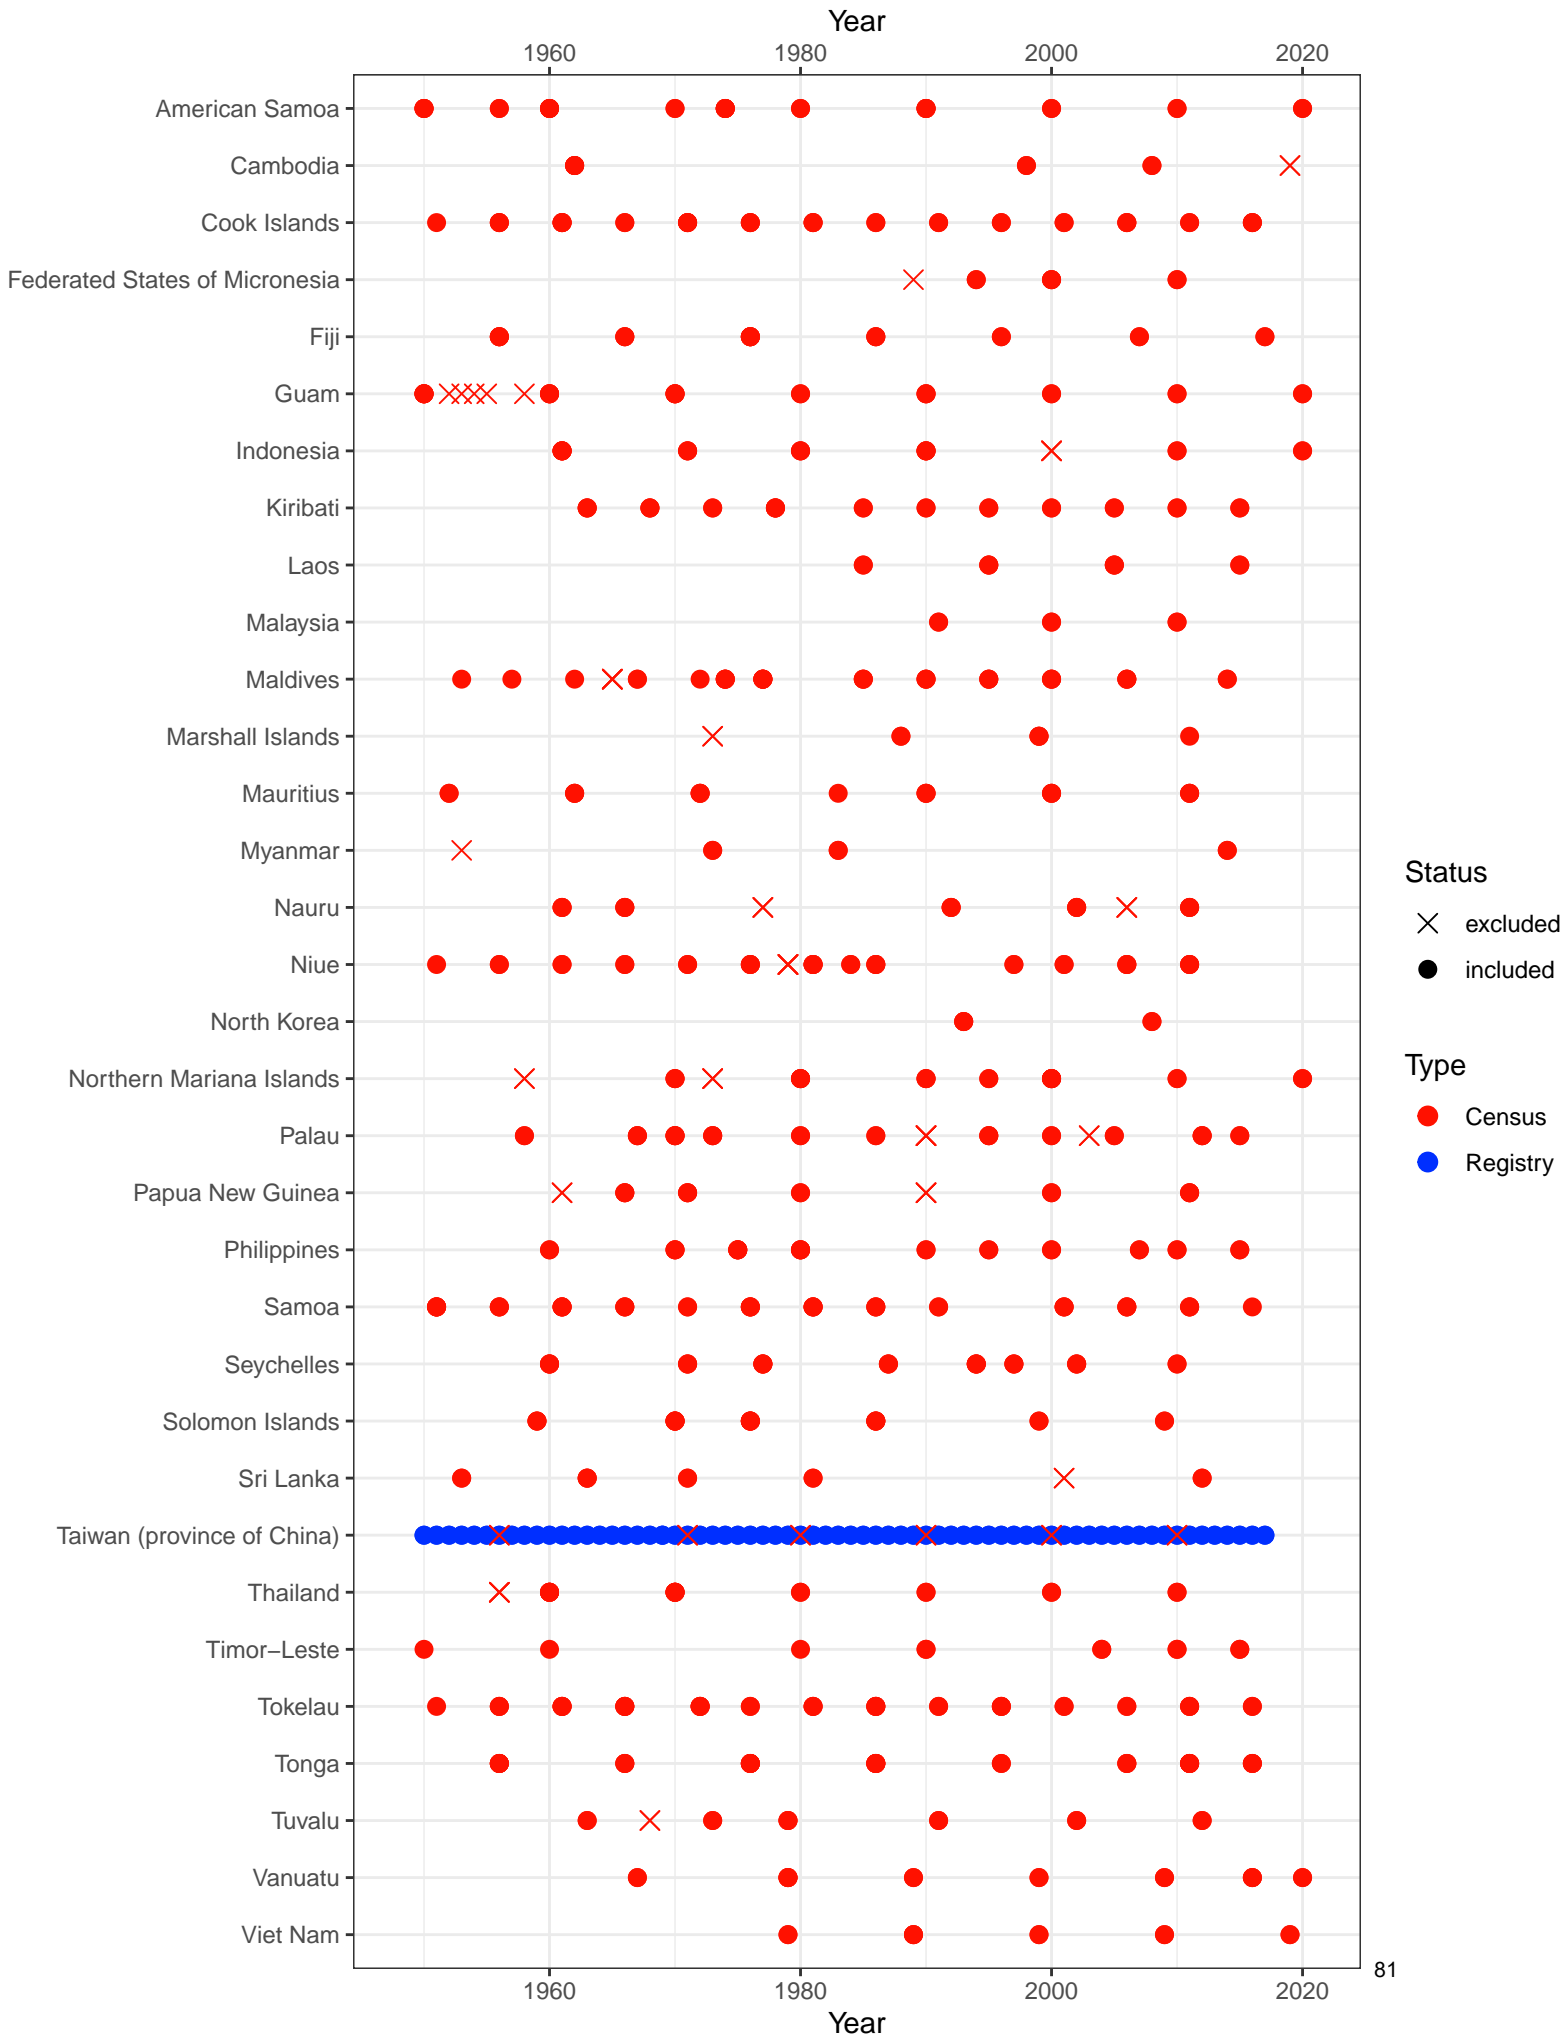

# Sub-Saharan Africa

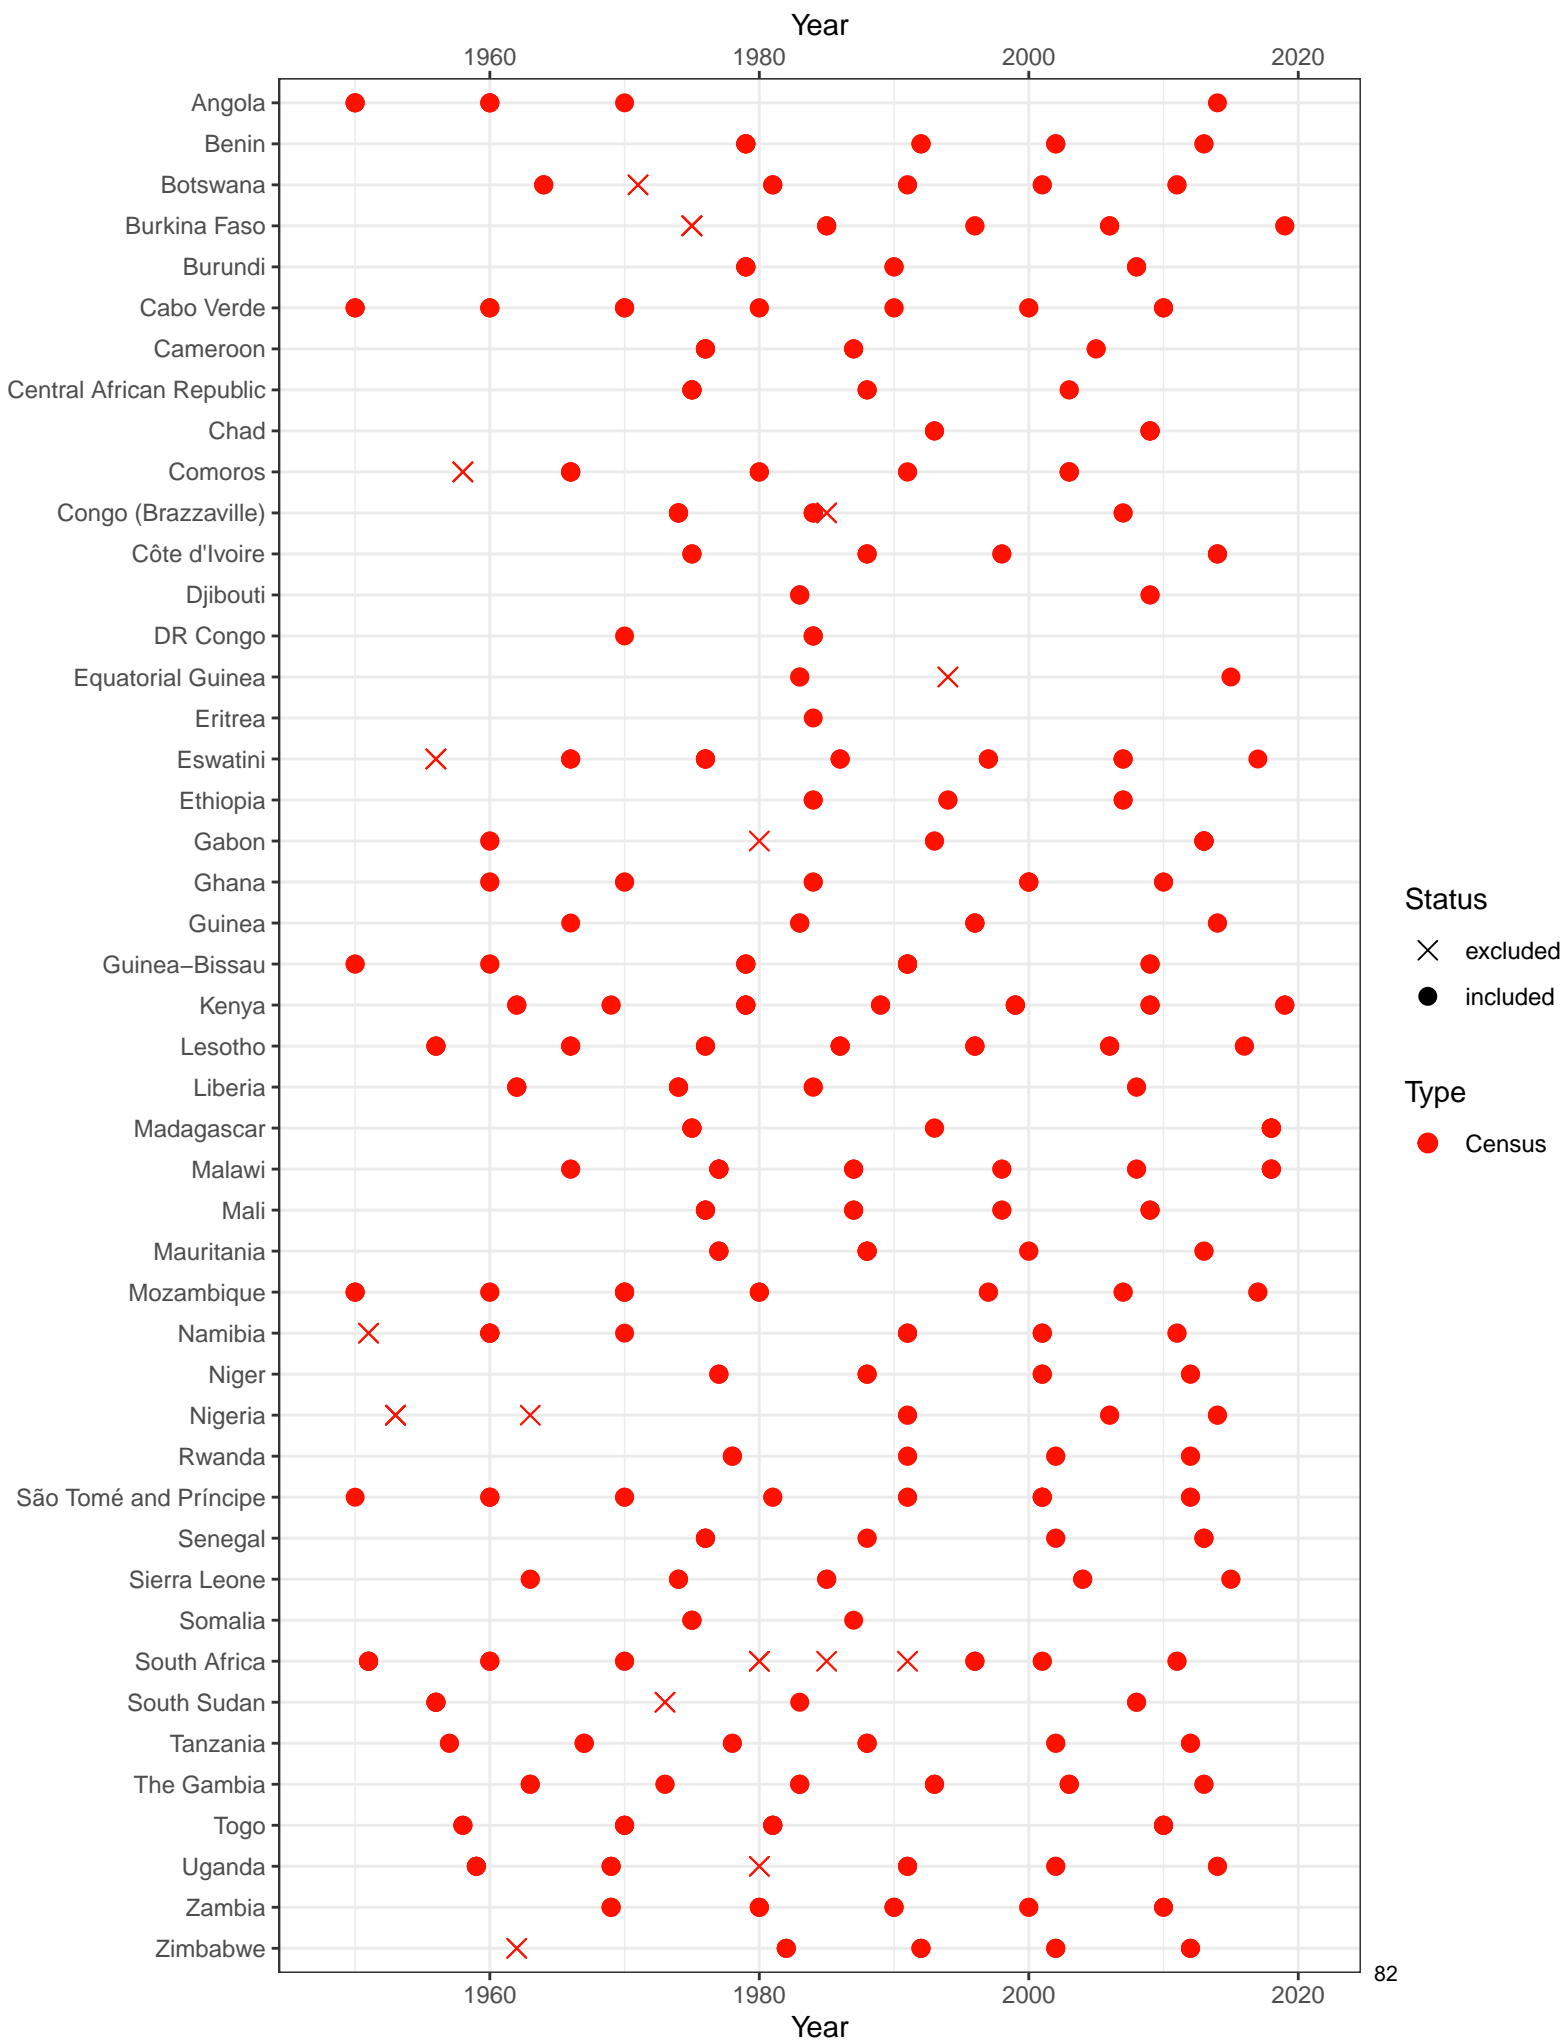

**Appendix Table S1: GBD location hierarchy with levels**

| Location                                         | Level |
|--------------------------------------------------|-------|
| Global                                           | 0     |
| Central Europe, eastern Europe, and central Asia | 1     |
| Central Asia                                     | 2     |
| Armenia                                          | 3     |
| Azerbaijan                                       | 3     |
| Georgia                                          | 3     |
| Kazakhstan                                       | 3     |
| Kyrgyzstan                                       | 3     |
| Mongolia                                         | 3     |
| Tajikistan                                       | 3     |
| Turkmenistan                                     | 3     |
| Uzbekistan                                       | 3     |
| Central Europe                                   | 2     |
| Albania                                          | 3     |
| Bosnia and Herzegovina                           | 3     |
| Bulgaria                                         | 3     |
| Croatia                                          | 3     |
| Czechia                                          | 3     |
| Hungary                                          | 3     |
| Montenegro                                       | 3     |
| North Macedonia                                  | 3     |
| Poland                                           | 3     |
| Romania                                          | 3     |
| Serbia                                           | 3     |
| Slovakia                                         | 3     |
| Slovenia                                         | 3     |
| Eastern Europe                                   | 2     |
| Belarus                                          | 3     |
| Estonia                                          | 3     |
| Latvia                                           | 3     |
| Lithuania                                        | 3     |
| Moldova                                          | 3     |
| Russia                                           | 3     |
| Ukraine                                          | 3     |
| High income                                      | 1     |
| Australasia                                      | 2     |
| Australia                                        | 3     |
| New Zealand                                      | 3     |
| High-income Asia Pacific                         | 2     |
| Brunei                                           | 3     |
| Japan                                            | 3     |
| Aichi                                            | 4     |
| Akita                                            | 4     |
| Aomori                                           | 4     |
| Chiba                                            | 4     |

|                           |   |
|---------------------------|---|
| Ehime                     | 4 |
| Fukui                     | 4 |
| Fukuoka                   | 4 |
| Fukushima                 | 4 |
| Gifu                      | 4 |
| Gunma                     | 4 |
| Hiroshima                 | 4 |
| Hokkaidō                  | 4 |
| Hyōgo                     | 4 |
| Ibaraki                   | 4 |
| Ishikawa                  | 4 |
| Iwate                     | 4 |
| Kagawa                    | 4 |
| Kagoshima                 | 4 |
| Kanagawa                  | 4 |
| Kōchi                     | 4 |
| Kumamoto                  | 4 |
| Kyōto                     | 4 |
| Mie                       | 4 |
| Miyagi                    | 4 |
| Miyazaki                  | 4 |
| Nagano                    | 4 |
| Nagasaki                  | 4 |
| Nara                      | 4 |
| Niigata                   | 4 |
| Ōita                      | 4 |
| Okayama                   | 4 |
| Okinawa                   | 4 |
| Ōsaka                     | 4 |
| Saga                      | 4 |
| Saitama                   | 4 |
| Shiga                     | 4 |
| Shimane                   | 4 |
| Shizuoka                  | 4 |
| Tochigi                   | 4 |
| Tokushima                 | 4 |
| Tōkyō                     | 4 |
| Tottori                   | 4 |
| Toyama                    | 4 |
| Wakayama                  | 4 |
| Yamagata                  | 4 |
| Yamaguchi                 | 4 |
| Yamanashi                 | 4 |
| South Korea               | 3 |
| Singapore                 | 3 |
| High-income North America | 2 |
| Canada                    | 3 |

|                |   |
|----------------|---|
| Greenland      | 3 |
| USA            | 3 |
| Alabama        | 4 |
| Alaska         | 4 |
| Arizona        | 4 |
| Arkansas       | 4 |
| California     | 4 |
| Colorado       | 4 |
| Connecticut    | 4 |
| Delaware       | 4 |
| Washington, DC | 4 |
| Florida        | 4 |
| Georgia        | 4 |
| Hawaii         | 4 |
| Idaho          | 4 |
| Illinois       | 4 |
| Indiana        | 4 |
| Iowa           | 4 |
| Kansas         | 4 |
| Kentucky       | 4 |
| Louisiana      | 4 |
| Maine          | 4 |
| Maryland       | 4 |
| Massachusetts  | 4 |
| Michigan       | 4 |
| Minnesota      | 4 |
| Mississippi    | 4 |
| Missouri       | 4 |
| Montana        | 4 |
| Nebraska       | 4 |
| Nevada         | 4 |
| New Hampshire  | 4 |
| New Jersey     | 4 |
| New Mexico     | 4 |
| New York       | 4 |
| North Carolina | 4 |
| North Dakota   | 4 |
| Ohio           | 4 |
| Oklahoma       | 4 |
| Oregon         | 4 |
| Pennsylvania   | 4 |
| Rhode Island   | 4 |
| South Carolina | 4 |
| South Dakota   | 4 |
| Tennessee      | 4 |
| Texas          | 4 |
| Utah           | 4 |

|                               |   |
|-------------------------------|---|
| Vermont                       | 4 |
| Virginia                      | 4 |
| Washington                    | 4 |
| West Virginia                 | 4 |
| Wisconsin                     | 4 |
| Wyoming                       | 4 |
| Southern Latin America        | 2 |
| Argentina                     | 3 |
| Chile                         | 3 |
| Uruguay                       | 3 |
| Western Europe                | 2 |
| Andorra                       | 3 |
| Austria                       | 3 |
| Belgium                       | 3 |
| Cyprus                        | 3 |
| Denmark                       | 3 |
| Finland                       | 3 |
| France                        | 3 |
| Germany                       | 3 |
| Greece                        | 3 |
| Iceland                       | 3 |
| Ireland                       | 3 |
| Israel                        | 3 |
| Italy                         | 3 |
| Abruzzo                       | 4 |
| Basilicata                    | 4 |
| Calabria                      | 4 |
| Campania                      | 4 |
| Emilia-Romagna                | 4 |
| Friuli-Venezia Giulia         | 4 |
| Lazio                         | 4 |
| Liguria                       | 4 |
| Lombardia                     | 4 |
| Marche                        | 4 |
| Molise                        | 4 |
| Piemonte                      | 4 |
| Provincia autonoma di Bolzano | 4 |
| Provincia autonoma di Trento  | 4 |
| Puglia                        | 4 |
| Sardegna                      | 4 |
| Sicilia                       | 4 |
| Toscana                       | 4 |
| Umbria                        | 4 |
| Valle d'Aosta                 | 4 |
| Veneto                        | 4 |
| Luxembourg                    | 3 |
| Malta                         | 3 |

|                         |   |
|-------------------------|---|
| Monaco                  | 3 |
| Netherlands             | 3 |
| Norway                  | 3 |
| Agder                   | 4 |
| Innlandet               | 4 |
| Møre og Romsdal         | 4 |
| Nordland                | 4 |
| Oslo                    | 4 |
| Rogaland                | 4 |
| Troms og Finnmark       | 4 |
| Trøndelag               | 4 |
| Vestfold og Telemark    | 4 |
| Vestland                | 4 |
| Viken                   | 4 |
| Portugal                | 3 |
| San Marino              | 3 |
| Spain                   | 3 |
| Sweden                  | 3 |
| Stockholm               | 4 |
| Sweden except Stockholm | 4 |
| Switzerland             | 3 |
| UK                      | 3 |
| England                 | 4 |
| East Midlands           | 5 |
| Derby                   | 6 |
| Derbyshire              | 6 |
| Leicester               | 6 |
| Leicestershire          | 6 |
| Lincolnshire            | 6 |
| Northamptonshire        | 6 |
| Nottingham              | 6 |
| Nottinghamshire         | 6 |
| Rutland                 | 6 |
| East of England         | 5 |
| Bedford                 | 6 |
| Cambridgeshire          | 6 |
| Central Bedfordshire    | 6 |
| Essex                   | 6 |
| Hertfordshire           | 6 |
| Luton                   | 6 |
| Norfolk                 | 6 |
| Peterborough            | 6 |
| Southend-on-Sea         | 6 |
| Suffolk                 | 6 |
| Thurrock                | 6 |
| Greater London          | 5 |
| Barking and Dagenham    | 6 |



|                        |   |
|------------------------|---|
| Barnet                 | 6 |
| Bexley                 | 6 |
| Brent                  | 6 |
| Bromley                | 6 |
| Camden                 | 6 |
| Croydon                | 6 |
| Ealing                 | 6 |
| Enfield                | 6 |
| Greenwich              | 6 |
| Hackney                | 6 |
| Hammersmith and Fulham | 6 |
| Haringey               | 6 |
| Harrow                 | 6 |
| Havering               | 6 |
| Hillingdon             | 6 |
| Hounslow               | 6 |
| Islington              | 6 |
| Kensington and Chelsea | 6 |
| Kingston upon Thames   | 6 |
| Lambeth                | 6 |
| Lewisham               | 6 |
| Merton                 | 6 |
| Newham                 | 6 |
| Redbridge              | 6 |
| Richmond upon Thames   | 6 |
| Southwark              | 6 |
| Sutton                 | 6 |
| Tower Hamlets          | 6 |
| Waltham Forest         | 6 |
| Wandsworth             | 6 |
| Westminster            | 6 |
| North East England     | 5 |
| County Durham          | 6 |
| Darlington             | 6 |
| Gateshead              | 6 |
| Hartlepool             | 6 |
| Middlesbrough          | 6 |
| Newcastle upon Tyne    | 6 |
| North Tyneside         | 6 |
| Northumberland         | 6 |
| Redcar and Cleveland   | 6 |
| South Tyneside         | 6 |
| Stockton-on-Tees       | 6 |
| Sunderland             | 6 |
| North West England     | 5 |
| Blackburn with Darwen  | 6 |
| Blackpool              | 6 |

|                              |   |
|------------------------------|---|
| Bolton                       | 6 |
| Bury                         | 6 |
| Cheshire East                | 6 |
| Cheshire West and Chester    | 6 |
| Cumbria                      | 6 |
| Halton                       | 6 |
| Knowsley                     | 6 |
| Lancashire                   | 6 |
| Liverpool                    | 6 |
| Manchester                   | 6 |
| Oldham                       | 6 |
| Rochdale                     | 6 |
| Salford                      | 6 |
| Sefton                       | 6 |
| St Helens                    | 6 |
| Stockport                    | 6 |
| Tameside                     | 6 |
| Trafford                     | 6 |
| Warrington                   | 6 |
| Wigan                        | 6 |
| Wirral                       | 6 |
| South East England           | 5 |
| Bracknell Forest             | 6 |
| Brighton and Hove            | 6 |
| Buckinghamshire              | 6 |
| East Sussex                  | 6 |
| Hampshire                    | 6 |
| Isle of Wight                | 6 |
| Kent                         | 6 |
| Medway                       | 6 |
| Milton Keynes                | 6 |
| Oxfordshire                  | 6 |
| Portsmouth                   | 6 |
| Reading                      | 6 |
| Slough                       | 6 |
| Southampton                  | 6 |
| Surrey                       | 6 |
| West Berkshire               | 6 |
| West Sussex                  | 6 |
| Windsor and Maidenhead       | 6 |
| Wokingham                    | 6 |
| South West England           | 5 |
| Bath and North East Somerset | 6 |
| Bournemouth                  | 6 |
| Bristol, City of             | 6 |
| Cornwall                     | 6 |
| Devon                        | 6 |

|                             |   |
|-----------------------------|---|
| Dorset                      | 6 |
| Gloucestershire             | 6 |
| North Somerset              | 6 |
| Plymouth                    | 6 |
| Poole                       | 6 |
| Somerset                    | 6 |
| South Gloucestershire       | 6 |
| Swindon                     | 6 |
| Torbay                      | 6 |
| Wiltshire                   | 6 |
| West Midlands               | 5 |
| Birmingham                  | 6 |
| Coventry                    | 6 |
| Dudley                      | 6 |
| Herefordshire, County of    | 6 |
| Sandwell                    | 6 |
| Shropshire                  | 6 |
| Solihull                    | 6 |
| Staffordshire               | 6 |
| Stoke-on-Trent              | 6 |
| Telford and Wrekin          | 6 |
| Walsall                     | 6 |
| Warwickshire                | 6 |
| Wolverhampton               | 6 |
| Worcestershire              | 6 |
| Yorkshire and the Humber    | 5 |
| Barnsley                    | 6 |
| Bradford                    | 6 |
| Calderdale                  | 6 |
| Doncaster                   | 6 |
| East Riding of Yorkshire    | 6 |
| Kingston upon Hull, City of | 6 |
| Kirklees                    | 6 |
| Leeds                       | 6 |
| North East Lincolnshire     | 6 |
| North Lincolnshire          | 6 |
| North Yorkshire             | 6 |
| Rotherham                   | 6 |
| Sheffield                   | 6 |
| Wakefield                   | 6 |
| York                        | 6 |
| Northern Ireland            | 4 |
| Scotland                    | 4 |
| Wales                       | 4 |
| Latin America and Caribbean | 1 |
| Andean Latin America        | 2 |
| Bolivia                     | 3 |

|                                  |   |
|----------------------------------|---|
| Ecuador                          | 3 |
| Peru                             | 3 |
| Caribbean                        | 2 |
| Antigua and Barbuda              | 3 |
| The Bahamas                      | 3 |
| Barbados                         | 3 |
| Belize                           | 3 |
| Bermuda                          | 3 |
| Cuba                             | 3 |
| Dominica                         | 3 |
| Dominican Republic               | 3 |
| Grenada                          | 3 |
| Guyana                           | 3 |
| Haiti                            | 3 |
| Jamaica                          | 3 |
| Puerto Rico                      | 3 |
| Saint Kitts and Nevis            | 3 |
| Saint Lucia                      | 3 |
| Saint Vincent and the Grenadines | 3 |
| Suriname                         | 3 |
| Trinidad and Tobago              | 3 |
| Virgin Islands                   | 3 |
| Central Latin America            | 2 |
| Colombia                         | 3 |
| Costa Rica                       | 3 |
| El Salvador                      | 3 |
| Guatemala                        | 3 |
| Honduras                         | 3 |
| Mexico                           | 3 |
| Aguascalientes                   | 4 |
| Baja California                  | 4 |
| Baja California Sur              | 4 |
| Campeche                         | 4 |
| Chiapas                          | 4 |
| Chihuahua                        | 4 |
| Coahuila                         | 4 |
| Colima                           | 4 |
| Durango                          | 4 |
| Guanajuato                       | 4 |
| Guerrero                         | 4 |
| Hidalgo                          | 4 |
| Jalisco                          | 4 |
| México                           | 4 |
| Mexico City                      | 4 |
| Michoacán de Ocampo              | 4 |
| Morelos                          | 4 |
| Nayarit                          | 4 |

|                                 |   |
|---------------------------------|---|
| Nuevo León                      | 4 |
| Oaxaca                          | 4 |
| Puebla                          | 4 |
| Querétaro                       | 4 |
| Quintana Roo                    | 4 |
| San Luis Potosí                 | 4 |
| Sinaloa                         | 4 |
| Sonora                          | 4 |
| Tabasco                         | 4 |
| Tamaulipas                      | 4 |
| Tlaxcala                        | 4 |
| Veracruz de Ignacio de la Llave | 4 |
| Yucatán                         | 4 |
| Zacatecas                       | 4 |
| Nicaragua                       | 3 |
| Panamá                          | 3 |
| Venezuela                       | 3 |
| Tropical Latin America          | 2 |
| Brazil                          | 3 |
| Acre                            | 4 |
| Alagoas                         | 4 |
| Amapá                           | 4 |
| Amazonas                        | 4 |
| Bahia                           | 4 |
| Ceará                           | 4 |
| Distrito Federal                | 4 |
| Espírito Santo                  | 4 |
| Goiás                           | 4 |
| Maranhão                        | 4 |
| Mato Grosso                     | 4 |
| Mato Grosso do Sul              | 4 |
| Minas Gerais                    | 4 |
| Pará                            | 4 |
| Paraíba                         | 4 |
| Paraná                          | 4 |
| Pernambuco                      | 4 |
| Piauí                           | 4 |
| Rio de Janeiro                  | 4 |
| Rio Grande do Norte             | 4 |
| Rio Grande do Sul               | 4 |
| Rondônia                        | 4 |
| Roraima                         | 4 |
| Santa Catarina                  | 4 |
| São Paulo                       | 4 |
| Sergipe                         | 4 |
| Tocantins                       | 4 |
| Paraguay                        | 3 |

|                              |   |
|------------------------------|---|
| North Africa and Middle East | 1 |
| North Africa and Middle East | 2 |
| Afghanistan                  | 3 |
| Algeria                      | 3 |
| Bahrain                      | 3 |
| Egypt                        | 3 |
| Iran                         | 3 |
| Alborz                       | 4 |
| Ardebil                      | 4 |
| Bushehr                      | 4 |
| Chahar Mahaal and Bakhtiari  | 4 |
| East Azarbayejan             | 4 |
| Fars                         | 4 |
| Gilan                        | 4 |
| Golestan                     | 4 |
| Hamadan                      | 4 |
| Hormozgan                    | 4 |
| Ilam                         | 4 |
| Isfahan                      | 4 |
| Kerman                       | 4 |
| Kermanshah                   | 4 |
| Khorasan-e-Razavi            | 4 |
| Khuzestan                    | 4 |
| Kohgiluyeh and Boyer-Ahmad   | 4 |
| Kurdistan                    | 4 |
| Lorestan                     | 4 |
| Markazi                      | 4 |
| Mazandaran                   | 4 |
| North Khorasan               | 4 |
| Qazvin                       | 4 |
| Qom                          | 4 |
| Semnan                       | 4 |
| Sistan and Baluchistan       | 4 |
| South Khorasan               | 4 |
| Tehran                       | 4 |
| West Azarbayejan             | 4 |
| Yazd                         | 4 |
| Zanjan                       | 4 |
| Iraq                         | 3 |
| Jordan                       | 3 |
| Kuwait                       | 3 |
| Lebanon                      | 3 |
| Libya                        | 3 |
| Morocco                      | 3 |
| Oman                         | 3 |
| Palestine                    | 3 |
| Qatar                        | 3 |

|                                        |   |
|----------------------------------------|---|
| Saudi Arabia                           | 3 |
| Sudan                                  | 3 |
| Syria                                  | 3 |
| Tunisia                                | 3 |
| Türkiye                                | 3 |
| United Arab Emirates                   | 3 |
| Yemen                                  | 3 |
| South Asia                             | 1 |
| South Asia                             | 2 |
| Bangladesh                             | 3 |
| Bhutan                                 | 3 |
| India                                  | 3 |
| Nepal                                  | 3 |
| Pakistan                               | 3 |
| Azad Jammu & Kashmir                   | 4 |
| Balochistan                            | 4 |
| Gilgit-Baltistan                       | 4 |
| Islamabad Capital Territory            | 4 |
| Khyber Pakhtunkhwa                     | 4 |
| Punjab                                 | 4 |
| Sindh                                  | 4 |
| Southeast Asia, east Asia, and Oceania | 1 |
| East Asia                              | 2 |
| China                                  | 3 |
| North Korea                            | 3 |
| Taiwan (province of China)             | 3 |
| Oceania                                | 2 |
| American Samoa                         | 3 |
| Cook Islands                           | 3 |
| Fiji                                   | 3 |
| Guam                                   | 3 |
| Kiribati                               | 3 |
| Marshall Islands                       | 3 |
| Federated States of Micronesia         | 3 |
| Nauru                                  | 3 |
| Niue                                   | 3 |
| Northern Mariana Islands               | 3 |
| Palau                                  | 3 |
| Papua New Guinea                       | 3 |
| Samoa                                  | 3 |
| Solomon Islands                        | 3 |
| Tokelau                                | 3 |
| Tonga                                  | 3 |
| Tuvalu                                 | 3 |
| Vanuatu                                | 3 |
| Southeast Asia                         | 2 |
| Cambodia                               | 3 |

|                         |   |
|-------------------------|---|
| Indonesia               | 3 |
| Aceh                    | 4 |
| Bali                    | 4 |
| Bangka-Belitung Islands | 4 |
| Banten                  | 4 |
| Bengkulu                | 4 |
| Gorontalo               | 4 |
| Jakarta                 | 4 |
| Jambi                   | 4 |
| West Java               | 4 |
| Central Java            | 4 |
| East Java               | 4 |
| West Kalimantan         | 4 |
| South Kalimantan        | 4 |
| Central Kalimantan      | 4 |
| East Kalimantan         | 4 |
| North Kalimantan        | 4 |
| Riau Islands            | 4 |
| Lampung                 | 4 |
| Maluku                  | 4 |
| North Maluku            | 4 |
| West Nusa Tenggara      | 4 |
| East Nusa Tenggara      | 4 |
| Papua                   | 4 |
| West Papua              | 4 |
| Riau                    | 4 |
| West Sulawesi           | 4 |
| South Sulawesi          | 4 |
| Central Sulawesi        | 4 |
| Southeast Sulawesi      | 4 |
| North Sulawesi          | 4 |
| West Sumatra            | 4 |
| South Sumatra           | 4 |
| North Sumatra           | 4 |
| Yogyakarta              | 4 |
| Laos                    | 3 |
| Malaysia                | 3 |
| Maldives                | 3 |
| Mauritius               | 3 |
| Myanmar                 | 3 |
| Philippines             | 3 |
| Abra                    | 4 |
| Agusan Del Norte        | 4 |
| Agusan Del Sur          | 4 |
| Aklan                   | 4 |
| Albay                   | 4 |
| Antique                 | 4 |



|                           |   |
|---------------------------|---|
| Apayao                    | 4 |
| Aurora                    | 4 |
| Basilan                   | 4 |
| Bataan                    | 4 |
| Batanes                   | 4 |
| Batangas                  | 4 |
| Benguet                   | 4 |
| Biliran                   | 4 |
| Bohol                     | 4 |
| Bukidnon                  | 4 |
| Bulacan                   | 4 |
| Cagayan                   | 4 |
| Camarines Norte           | 4 |
| Camarines Sur             | 4 |
| Camiguin                  | 4 |
| Capiz                     | 4 |
| Catanduanes               | 4 |
| Cavite                    | 4 |
| Cebu                      | 4 |
| Cotabato (North Cotabato) | 4 |
| Davao de Oro              | 4 |
| Davao Del Norte           | 4 |
| Davao Del Sur             | 4 |
| Davao Occidental          | 4 |
| Davao Oriental            | 4 |
| Dinagat Islands           | 4 |
| Eastern Samar             | 4 |
| Guimaras                  | 4 |
| Ifugao                    | 4 |
| Ilocos Norte              | 4 |
| Ilocos Sur                | 4 |
| Iloilo                    | 4 |
| Isabela                   | 4 |
| Kalinga                   | 4 |
| La Union                  | 4 |
| Laguna                    | 4 |
| Lanao Del Norte           | 4 |
| Lanao Del Sur             | 4 |
| Leyte                     | 4 |
| Maguindanao               | 4 |
| Marinduque                | 4 |
| Masbate                   | 4 |
| Misamis Occidental        | 4 |
| Misamis Oriental          | 4 |
| Mountain Province         | 4 |
| National Capital Region   | 4 |
| Negros Occidental         | 4 |

|                            |   |
|----------------------------|---|
| Negros Oriental            | 4 |
| Northern Samar             | 4 |
| Nueva Ecija                | 4 |
| Nueva Vizcaya              | 4 |
| Occidental Mindoro         | 4 |
| Oriental Mindoro           | 4 |
| Palawan                    | 4 |
| Pampanga                   | 4 |
| Pangasinan                 | 4 |
| Quezon                     | 4 |
| Quirino                    | 4 |
| Rizal                      | 4 |
| Romblon                    | 4 |
| Samar (Western Samar)      | 4 |
| Sarangani                  | 4 |
| Siquijor                   | 4 |
| Sorsogon                   | 4 |
| South Cotabato             | 4 |
| Southern Leyte             | 4 |
| Sultan Kudarat             | 4 |
| Sulu                       | 4 |
| Surigao Del Norte          | 4 |
| Surigao Del Sur            | 4 |
| Tarlac                     | 4 |
| Tawi-Tawi                  | 4 |
| Zambales                   | 4 |
| Zamboanga Del Norte        | 4 |
| Zamboanga Del Sur          | 4 |
| Zamboanga Sibugay          | 4 |
| Seychelles                 | 3 |
| Sri Lanka                  | 3 |
| Thailand                   | 3 |
| Timor-Leste                | 3 |
| Viet Nam                   | 3 |
| Sub-Saharan Africa         | 1 |
| Central sub-Saharan Africa | 2 |
| Angola                     | 3 |
| Central African Republic   | 3 |
| Congo (Brazzaville)        | 3 |
| DR Congo                   | 3 |
| Equatorial Guinea          | 3 |
| Gabon                      | 3 |
| Eastern sub-Saharan Africa | 2 |
| Burundi                    | 3 |
| Comoros                    | 3 |
| Djibouti                   | 3 |
| Eritrea                    | 3 |

|                                              |   |
|----------------------------------------------|---|
| Ethiopia                                     | 3 |
| Addis Ababa                                  | 4 |
| Afar                                         | 4 |
| Amhara                                       | 4 |
| Benishangul-Gumuz                            | 4 |
| Dire Dawa                                    | 4 |
| Gambella                                     | 4 |
| Harari                                       | 4 |
| Oromia                                       | 4 |
| Somali                                       | 4 |
| Southern Nations, Nationalities, and Peoples | 4 |
| Tigray                                       | 4 |
| Kenya                                        | 3 |
| Baringo                                      | 4 |
| Bomet                                        | 4 |
| Bungoma                                      | 4 |
| Busia                                        | 4 |
| Elgeyo Marakwet                              | 4 |
| Embu                                         | 4 |
| Garissa                                      | 4 |
| Homa Bay                                     | 4 |
| Isiolo                                       | 4 |
| Kajiado                                      | 4 |
| Kakamega                                     | 4 |
| Kericho                                      | 4 |
| Kiambu                                       | 4 |
| Kilifi                                       | 4 |
| Kirinyaga                                    | 4 |
| Kisii                                        | 4 |
| Kisumu                                       | 4 |
| Kitui                                        | 4 |
| Kwale                                        | 4 |
| Laikipia                                     | 4 |
| Lamu                                         | 4 |
| Machakos                                     | 4 |
| Makueni                                      | 4 |
| Mandera                                      | 4 |
| Marsabit                                     | 4 |
| Meru                                         | 4 |
| Migori                                       | 4 |
| Mombasa                                      | 4 |
| Murang'a                                     | 4 |
| Nairobi                                      | 4 |
| Nakuru                                       | 4 |
| Nandi                                        | 4 |
| Narok                                        | 4 |
| Nyamira                                      | 4 |

|                             |   |
|-----------------------------|---|
| Nyandarua                   | 4 |
| Nyeri                       | 4 |
| Samburu                     | 4 |
| Siaya                       | 4 |
| Taita Taveta                | 4 |
| Tana River                  | 4 |
| Tharaka Nithi               | 4 |
| Trans Nzoia                 | 4 |
| Turkana                     | 4 |
| Uasin Gishu                 | 4 |
| Vihiga                      | 4 |
| Wajir                       | 4 |
| West Pokot                  | 4 |
| Madagascar                  | 3 |
| Malawi                      | 3 |
| Mozambique                  | 3 |
| Rwanda                      | 3 |
| Somalia                     | 3 |
| South Sudan                 | 3 |
| Uganda                      | 3 |
| Tanzania                    | 3 |
| Zambia                      | 3 |
| Southern sub-Saharan Africa | 2 |
| Botswana                    | 3 |
| Eswatini                    | 3 |
| Lesotho                     | 3 |
| Namibia                     | 3 |
| South Africa                | 3 |
| Eastern Cape                | 4 |
| Free State                  | 4 |
| Gauteng                     | 4 |
| KwaZulu-Natal               | 4 |
| Limpopo                     | 4 |
| Mpumalanga                  | 4 |
| North West                  | 4 |
| Northern Cape               | 4 |
| Western Cape                | 4 |
| Zimbabwe                    | 3 |
| Western sub-Saharan Africa  | 2 |
| Benin                       | 3 |
| Burkina Faso                | 3 |
| Cabo Verde                  | 3 |
| Cameroon                    | 3 |
| Chad                        | 3 |
| Côte d'Ivoire               | 3 |
| The Gambia                  | 3 |
| Ghana                       | 3 |

|                       |   |
|-----------------------|---|
| Guinea                | 3 |
| Guinea-Bissau         | 3 |
| Liberia               | 3 |
| Mali                  | 3 |
| Mauritania            | 3 |
| Niger                 | 3 |
| Nigeria               | 3 |
| São Tomé and Príncipe | 3 |
| Senegal               | 3 |
| Sierra Leone          | 3 |
| Togo                  | 3 |

Appendix table S2. GATHER checklist

| Item #                                                                                                | Checklist item                                                                                                                                                                                                                                                                                                                                                                            | Reporting location                                                                                                                                                                                                                                       |
|-------------------------------------------------------------------------------------------------------|-------------------------------------------------------------------------------------------------------------------------------------------------------------------------------------------------------------------------------------------------------------------------------------------------------------------------------------------------------------------------------------------|----------------------------------------------------------------------------------------------------------------------------------------------------------------------------------------------------------------------------------------------------------|
| <b>Objectives and funding</b>                                                                         |                                                                                                                                                                                                                                                                                                                                                                                           |                                                                                                                                                                                                                                                          |
| 1                                                                                                     | Define the indicator(s), populations (including age, sex, and geographic entities), and time period(s) for which estimates were made.                                                                                                                                                                                                                                                     | Main text (Summary—methods section); Main text (Methods section); appendix 1 (section 1.1–1.4)                                                                                                                                                           |
| 2                                                                                                     | List the funding sources for the work.                                                                                                                                                                                                                                                                                                                                                    | Main text (acknowledgement section); Primary funder given in Summary—funding; appendix 1 (section 1.9)                                                                                                                                                   |
| <b>Data Inputs</b>                                                                                    |                                                                                                                                                                                                                                                                                                                                                                                           |                                                                                                                                                                                                                                                          |
| <i>For all data inputs from multiple sources that are synthesized as part of the study:</i>           |                                                                                                                                                                                                                                                                                                                                                                                           |                                                                                                                                                                                                                                                          |
| 3                                                                                                     | Describe how the data were identified and how the data were accessed.                                                                                                                                                                                                                                                                                                                     | Main text (Methods); appendix 1 (section 1.8, section 2.2.1, Section 2.3.1, section 2.7.1, section 3.2, section 4.2–4.3)                                                                                                                                 |
| 4                                                                                                     | Specify the inclusion and exclusion criteria. Identify all ad-hoc exclusions.                                                                                                                                                                                                                                                                                                             | Main text (Methods); appendix 1 (section 1.8, section 2.2.1–2.2.3, section 2.3.1–2.3.2, section 2.7.1–2.7.4, section 3.2, section 4.2–4.3)                                                                                                               |
| 5                                                                                                     | Provide information on all included data sources and their main characteristics. For each data source used, report reference information or contact name/institution, population represented, data collection method, year(s) of data collection, sex and age range, diagnostic criteria or measurement method, and sample size, as relevant.                                             | Online data citation tool: <a href="https://ghdx.healthdata.org/gbd-2021/sources">https://ghdx.healthdata.org/gbd-2021/sources</a>                                                                                                                       |
| 6                                                                                                     | Identify and describe any categories of input data that have potentially important biases (e.g., based on characteristics listed in item 5).                                                                                                                                                                                                                                              | Appendix 1 (section 1.8, section 2.2.1–2.2.6, section 2.3.1–2.3.4, section 2.5.4, section 2.7.1–2.7.4, section 3.2, section 4.2–4.4, section 6.4)                                                                                                        |
| <i>For data inputs that contribute to the analysis but were not synthesized as part of the study:</i> |                                                                                                                                                                                                                                                                                                                                                                                           |                                                                                                                                                                                                                                                          |
| 7                                                                                                     | Describe and give sources for any other data inputs.                                                                                                                                                                                                                                                                                                                                      | Online data citation tool: <a href="https://ghdx.healthdata.org/gbd-2021/sources">https://ghdx.healthdata.org/gbd-2021/sources</a>                                                                                                                       |
| <i>For all data inputs:</i>                                                                           |                                                                                                                                                                                                                                                                                                                                                                                           |                                                                                                                                                                                                                                                          |
| 8                                                                                                     | Provide all data inputs in a file format from which data can be efficiently extracted (e.g., a spreadsheet rather than a PDF), including all relevant meta-data listed in item 5. For any data inputs that cannot be shared because of ethical or legal reasons, such as third-party ownership, provide a contact name or the name of the institution that retains the right to the data. | Online data citation tool: <a href="https://ghdx.healthdata.org/gbd-2021/sources">https://ghdx.healthdata.org/gbd-2021/sources</a> . Availability of data is dependent on data use agreements; contact information provided when not directly available. |
| <b>Data analysis</b>                                                                                  |                                                                                                                                                                                                                                                                                                                                                                                           |                                                                                                                                                                                                                                                          |
| 9                                                                                                     | Provide a conceptual overview of the data analysis method. A diagram may be helpful.                                                                                                                                                                                                                                                                                                      | Main text (Methods); appendix 1 (sections 2–5; figures S1, S3, and S4)                                                                                                                                                                                   |
| 10                                                                                                    | Provide a detailed description of all steps of the analysis, including mathematical formulae. This description should cover, as relevant, data cleaning, data pre-processing, data                                                                                                                                                                                                        | Main text (Methods); appendix 1 (sections 2–5)                                                                                                                                                                                                           |

|                               |                                                                                                                                                                  |                                                                                                                                                                                                                                                                                                                                                    |
|-------------------------------|------------------------------------------------------------------------------------------------------------------------------------------------------------------|----------------------------------------------------------------------------------------------------------------------------------------------------------------------------------------------------------------------------------------------------------------------------------------------------------------------------------------------------|
|                               | adjustments and weighting of data sources, and mathematical or statistical model(s).                                                                             |                                                                                                                                                                                                                                                                                                                                                    |
| 11                            | Describe how candidate models were evaluated and how the final model(s) were selected.                                                                           | Appendix 1 (section 2.2-2.8, section 3.3-3.4, section 4.4, section 6)                                                                                                                                                                                                                                                                              |
| 12                            | Provide the results of an evaluation of model performance, if done, as well as the results of any relevant sensitivity analysis.                                 | Appendix 1 (section 2.2-2.8, section 3.3-3.4, section 4.4, section 6)                                                                                                                                                                                                                                                                              |
| 13                            | Describe methods for calculating uncertainty of the estimates. State which sources of uncertainty were, and were not, accounted for in the uncertainty analysis. | Appendix 1 (section 2.2.6, section 2.3.2, section 2.4.4, section 2.5.3-2.5.4, section 2.7.6, section 3.3.6, section 4.2.3, section 4.4.4, section 6.4)                                                                                                                                                                                             |
| 14                            | State how analytic or statistical source code used to generate estimates can be accessed.                                                                        | Code provided in online repository: <a href="http://ghdx.healthdata.org/gbd-2021/code">http://ghdx.healthdata.org/gbd-2021/code</a>                                                                                                                                                                                                                |
| <b>Results and Discussion</b> |                                                                                                                                                                  |                                                                                                                                                                                                                                                                                                                                                    |
| 15                            | Provide published estimates in a file format from which data can be efficiently extracted.                                                                       | Online data/results visualisation tool: <a href="https://vizhub.healthdata.org/gbd-results/">https://vizhub.healthdata.org/gbd-results/</a> . Results can be selected from drop-down menus and downloaded as CSVs; select datasets of estimates available at <a href="http://ghdx.healthdata.org/gbd-2021">http://ghdx.healthdata.org/gbd-2021</a> |
| 16                            | Report a quantitative measure of the uncertainty of the estimates (e.g. uncertainty intervals).                                                                  | UIs given in main text and methods appendix, including in figures (as appropriate) and tables; UIs also provided in appendix 2; UIs also given for all results in our online results tool: <a href="https://vizhub.healthdata.org/gbd-results/">https://vizhub.healthdata.org/gbd-results/</a>                                                     |
| 17                            | Interpret results in light of existing evidence. If updating a previous set of estimates, describe the reasons for changes in estimates.                         | Main text (Discussion)                                                                                                                                                                                                                                                                                                                             |
| 18                            | Discuss limitations of the estimates. Include a discussion of any modelling assumptions or data limitations that affect interpretation of the estimates.         | Main text (Discussion—limitations)                                                                                                                                                                                                                                                                                                                 |

**Appendix Table 3. Number of all-cause mortality data sources by type and location, 1950-2021**

| Location               | SBH | CBH | HH | SIBS | VR/SRS/DSP | DSS |
|------------------------|-----|-----|----|------|------------|-----|
| Armenia                | 6   | 4   | 0  | 0    | 42         | 0   |
| Azerbaijan             | 4   | 1   | 2  | 0    | 43         | 0   |
| Georgia                | 3   | 3   | 1  | 0    | 43         | 0   |
| Kazakhstan             | 8   | 2   | 0  | 0    | 43         | 0   |
| Kyrgyzstan             | 7   | 4   | 1  | 0    | 42         | 0   |
| Mongolia               | 9   | 3   | 2  | 0    | 40         | 0   |
| Tajikistan             | 8   | 2   | 1  | 0    | 39         | 0   |
| Turkmenistan           | 3   | 1   | 2  | 0    | 38         | 0   |
| Uzbekistan             | 4   | 2   | 0  | 0    | 42         | 0   |
| Albania                | 6   | 2   | 0  | 0    | 42         | 0   |
| Bosnia and Herzegovina | 0   | 0   | 0  | 0    | 65         | 0   |
| Bulgaria               | 4   | 0   | 0  | 0    | 72         | 0   |
| Croatia                | 0   | 0   | 0  | 0    | 72         | 0   |
| Czechia                | 0   | 0   | 0  | 0    | 72         | 0   |
| Hungary                | 1   | 0   | 0  | 0    | 72         | 0   |
| Montenegro             | 1   | 0   | 0  | 0    | 63         | 0   |
| North Macedonia        | 2   | 0   | 0  | 0    | 71         | 0   |
| Poland                 | 1   | 0   | 0  | 0    | 72         | 0   |
| Romania                | 4   | 1   | 1  | 0    | 66         | 0   |
| Serbia                 | 4   | 0   | 1  | 0    | 65         | 0   |
| Slovakia               | 0   | 0   | 0  | 0    | 72         | 0   |
| Slovenia               | 0   | 0   | 0  | 0    | 72         | 0   |
| Belarus                | 3   | 0   | 0  | 0    | 62         | 0   |
| Estonia                | 1   | 0   | 0  | 0    | 63         | 0   |
| Latvia                 | 1   | 0   | 0  | 0    | 62         | 0   |
| Lithuania              | 0   | 0   | 0  | 0    | 63         | 0   |
| Moldova                | 4   | 2   | 0  | 0    | 43         | 0   |
| Russia                 | 1   | 0   | 0  | 0    | 63         | 0   |
| Ukraine                | 6   | 2   | 0  | 0    | 58         | 0   |
| Australia              | 0   | 0   | 0  | 0    | 71         | 0   |
| New Zealand            | 0   | 0   | 0  | 0    | 72         | 0   |
| Brunei                 | 1   | 0   | 0  | 0    | 62         | 0   |
| Japan                  | 0   | 0   | 0  | 0    | 72         | 0   |
| Aichi                  | 0   | 0   | 0  | 0    | 43         | 0   |
| Akita                  | 0   | 0   | 0  | 0    | 43         | 0   |
| Aomori                 | 0   | 0   | 0  | 0    | 43         | 0   |
| Chiba                  | 0   | 0   | 0  | 0    | 43         | 0   |
| Ehime                  | 0   | 0   | 0  | 0    | 43         | 0   |
| Fukui                  | 0   | 0   | 0  | 0    | 43         | 0   |
| Fukuoka                | 0   | 0   | 0  | 0    | 43         | 0   |
| Fukushima              | 0   | 0   | 0  | 0    | 43         | 0   |
| Gifu                   | 0   | 0   | 0  | 0    | 43         | 0   |
| Gunma                  | 0   | 0   | 0  | 0    | 43         | 0   |
| Hiroshima              | 0   | 0   | 0  | 0    | 43         | 0   |
| Hokkaidō               | 0   | 0   | 0  | 0    | 43         | 0   |
| Hyōgo                  | 0   | 0   | 0  | 0    | 42         | 0   |
| Ibaraki                | 0   | 0   | 0  | 0    | 43         | 0   |
| Ishikawa               | 0   | 0   | 0  | 0    | 43         | 0   |
| Iwate                  | 0   | 0   | 0  | 0    | 42         | 0   |
| Kagawa                 | 0   | 0   | 0  | 0    | 43         | 0   |
| Kagoshima              | 0   | 0   | 0  | 0    | 43         | 0   |
| Kanagawa               | 0   | 0   | 0  | 0    | 43         | 0   |
| Kōchi                  | 0   | 0   | 0  | 0    | 43         | 0   |
| Kumamoto               | 0   | 0   | 0  | 0    | 43         | 0   |
| Kyōto                  | 0   | 0   | 0  | 0    | 43         | 0   |
| Mie                    | 0   | 0   | 0  | 0    | 43         | 0   |
| Miyagi                 | 0   | 0   | 0  | 0    | 43         | 0   |
| Miyazaki               | 0   | 0   | 0  | 0    | 43         | 0   |
| Nagano                 | 0   | 0   | 0  | 0    | 43         | 0   |
| Nagasaki               | 0   | 0   | 0  | 0    | 43         | 0   |
| Nara                   | 0   | 0   | 0  | 0    | 43         | 0   |
| Niigata                | 0   | 0   | 0  | 0    | 43         | 0   |
| Ōita                   | 0   | 0   | 0  | 0    | 43         | 0   |
| Okayama                | 0   | 0   | 0  | 0    | 43         | 0   |



**Appendix Table 3. Number of all-cause mortality data sources by type and location, 1950-2021**

| Location       | SBH | CBH | HH | SIBS | VR/SRS/DSP | DSS |
|----------------|-----|-----|----|------|------------|-----|
| Okinawa        | 0   | 0   | 0  | 0    | 43         | 0   |
| Ōsaka          | 0   | 0   | 0  | 0    | 43         | 0   |
| Saga           | 0   | 0   | 0  | 0    | 43         | 0   |
| Saitama        | 0   | 0   | 0  | 0    | 43         | 0   |
| Shiga          | 0   | 0   | 0  | 0    | 43         | 0   |
| Shimane        | 0   | 0   | 0  | 0    | 43         | 0   |
| Shizuoka       | 0   | 0   | 0  | 0    | 43         | 0   |
| Tochigi        | 0   | 0   | 0  | 0    | 43         | 0   |
| Tokushima      | 0   | 0   | 0  | 0    | 43         | 0   |
| Tōkyō          | 0   | 0   | 0  | 0    | 43         | 0   |
| Tottori        | 0   | 0   | 0  | 0    | 43         | 0   |
| Toyama         | 0   | 0   | 0  | 0    | 43         | 0   |
| Wakayama       | 0   | 0   | 0  | 0    | 43         | 0   |
| Yamagata       | 0   | 0   | 0  | 0    | 43         | 0   |
| Yamaguchi      | 0   | 0   | 0  | 0    | 43         | 0   |
| Yamanashi      | 0   | 0   | 0  | 0    | 43         | 0   |
| South Korea    | 6   | 1   | 0  | 0    | 45         | 0   |
| Singapore      | 0   | 0   | 0  | 0    | 103        | 0   |
| Canada         | 0   | 0   | 0  | 0    | 71         | 0   |
| Greenland      | 0   | 0   | 0  | 0    | 60         | 0   |
| USA            | 0   | 0   | 0  | 0    | 71         | 0   |
| Alabama        | 0   | 0   | 0  | 0    | 62         | 0   |
| Alaska         | 0   | 0   | 0  | 0    | 62         | 0   |
| Arizona        | 0   | 0   | 0  | 0    | 62         | 0   |
| Arkansas       | 0   | 0   | 0  | 0    | 62         | 0   |
| California     | 0   | 0   | 0  | 0    | 62         | 0   |
| Colorado       | 0   | 0   | 0  | 0    | 62         | 0   |
| Connecticut    | 0   | 0   | 0  | 0    | 62         | 0   |
| Delaware       | 0   | 0   | 0  | 0    | 62         | 0   |
| Washington, DC | 0   | 0   | 0  | 0    | 62         | 0   |
| Florida        | 0   | 0   | 0  | 0    | 62         | 0   |
| Georgia        | 0   | 0   | 0  | 0    | 62         | 0   |
| Hawaii         | 0   | 0   | 0  | 0    | 62         | 0   |
| Idaho          | 0   | 0   | 0  | 0    | 62         | 0   |
| Illinois       | 0   | 0   | 0  | 0    | 62         | 0   |
| Indiana        | 0   | 0   | 0  | 0    | 62         | 0   |
| Iowa           | 0   | 0   | 0  | 0    | 62         | 0   |
| Kansas         | 0   | 0   | 0  | 0    | 62         | 0   |
| Kentucky       | 0   | 0   | 0  | 0    | 62         | 0   |
| Louisiana      | 0   | 0   | 0  | 0    | 62         | 0   |
| Maine          | 0   | 0   | 0  | 0    | 62         | 0   |
| Maryland       | 0   | 0   | 0  | 0    | 62         | 0   |
| Massachusetts  | 0   | 0   | 0  | 0    | 62         | 0   |
| Michigan       | 0   | 0   | 0  | 0    | 62         | 0   |
| Minnesota      | 0   | 0   | 0  | 0    | 62         | 0   |
| Mississippi    | 0   | 0   | 0  | 0    | 62         | 0   |
| Missouri       | 0   | 0   | 0  | 0    | 62         | 0   |
| Montana        | 0   | 0   | 0  | 0    | 62         | 0   |
| Nebraska       | 0   | 0   | 0  | 0    | 62         | 0   |
| Nevada         | 0   | 0   | 0  | 0    | 62         | 0   |
| New Hampshire  | 0   | 0   | 0  | 0    | 62         | 0   |
| New Jersey     | 0   | 0   | 0  | 0    | 62         | 0   |
| New Mexico     | 0   | 0   | 0  | 0    | 62         | 0   |
| New York       | 0   | 0   | 0  | 0    | 62         | 0   |
| North Carolina | 0   | 0   | 0  | 0    | 62         | 0   |
| North Dakota   | 0   | 0   | 0  | 0    | 62         | 0   |
| Ohio           | 0   | 0   | 0  | 0    | 62         | 0   |
| Oklahoma       | 0   | 0   | 0  | 0    | 62         | 0   |
| Oregon         | 0   | 0   | 0  | 0    | 62         | 0   |
| Pennsylvania   | 0   | 0   | 0  | 0    | 62         | 0   |
| Rhode Island   | 0   | 0   | 0  | 0    | 62         | 0   |
| South Carolina | 0   | 0   | 0  | 0    | 62         | 0   |
| South Dakota   | 0   | 0   | 0  | 0    | 62         | 0   |
| Tennessee      | 0   | 0   | 0  | 0    | 62         | 0   |

**Appendix Table 3. Number of all-cause mortality data sources by type and location, 1950-2021**

| Location                      | SBH | CBH | HH | SIBS | VR/SRS/DSP | DSS |
|-------------------------------|-----|-----|----|------|------------|-----|
| Texas                         | 0   | 0   | 0  | 0    | 62         | 0   |
| Utah                          | 0   | 0   | 0  | 0    | 62         | 0   |
| Vermont                       | 0   | 0   | 0  | 0    | 62         | 0   |
| Virginia                      | 0   | 0   | 0  | 0    | 62         | 0   |
| Washington                    | 0   | 0   | 0  | 0    | 62         | 0   |
| West Virginia                 | 0   | 0   | 0  | 0    | 62         | 0   |
| Wisconsin                     | 0   | 0   | 0  | 0    | 62         | 0   |
| Wyoming                       | 0   | 0   | 0  | 0    | 62         | 0   |
| Argentina                     | 3   | 0   | 0  | 0    | 66         | 0   |
| Chile                         | 4   | 0   | 0  | 0    | 72         | 0   |
| Uruguay                       | 6   | 0   | 0  | 0    | 69         | 0   |
| Andorra                       | 0   | 0   | 0  | 0    | 21         | 0   |
| Austria                       | 0   | 0   | 0  | 0    | 72         | 0   |
| Belgium                       | 2   | 0   | 0  | 0    | 72         | 0   |
| Cyprus                        | 3   | 0   | 1  | 0    | 48         | 0   |
| Denmark                       | 0   | 0   | 0  | 0    | 72         | 0   |
| Finland                       | 0   | 0   | 0  | 0    | 72         | 0   |
| France                        | 0   | 0   | 0  | 0    | 71         | 0   |
| Germany                       | 0   | 0   | 0  | 0    | 66         | 0   |
| Greece                        | 0   | 0   | 0  | 0    | 71         | 0   |
| Iceland                       | 0   | 0   | 0  | 0    | 72         | 0   |
| Ireland                       | 0   | 0   | 1  | 0    | 70         | 0   |
| Israel                        | 0   | 0   | 0  | 0    | 71         | 0   |
| Italy                         | 0   | 0   | 0  | 0    | 72         | 0   |
| Abruzzo                       | 0   | 0   | 0  | 0    | 53         | 0   |
| Basilicata                    | 0   | 0   | 0  | 0    | 53         | 0   |
| Calabria                      | 0   | 0   | 0  | 0    | 53         | 0   |
| Campania                      | 0   | 0   | 0  | 0    | 53         | 0   |
| Emilia-Romagna                | 0   | 0   | 0  | 0    | 53         | 0   |
| Friuli-Venezia Giulia         | 0   | 0   | 0  | 0    | 53         | 0   |
| Lazio                         | 0   | 0   | 0  | 0    | 53         | 0   |
| Liguria                       | 0   | 0   | 0  | 0    | 53         | 0   |
| Lombardia                     | 0   | 0   | 0  | 0    | 53         | 0   |
| Marche                        | 0   | 0   | 0  | 0    | 53         | 0   |
| Molise                        | 0   | 0   | 0  | 0    | 53         | 0   |
| Piemonte                      | 0   | 0   | 0  | 0    | 53         | 0   |
| Provincia autonoma di Bolzano | 0   | 0   | 0  | 0    | 52         | 0   |
| Provincia autonoma di Trento  | 0   | 0   | 0  | 0    | 52         | 0   |
| Puglia                        | 0   | 0   | 0  | 0    | 53         | 0   |
| Sardegna                      | 0   | 0   | 0  | 0    | 53         | 0   |
| Sicilia                       | 0   | 0   | 0  | 0    | 53         | 0   |
| Toscana                       | 0   | 0   | 0  | 0    | 53         | 0   |
| Umbria                        | 0   | 0   | 0  | 0    | 53         | 0   |
| Valle d'Aosta                 | 0   | 0   | 0  | 0    | 53         | 0   |
| Veneto                        | 0   | 0   | 0  | 0    | 53         | 0   |
| Luxembourg                    | 0   | 0   | 0  | 0    | 72         | 0   |
| Malta                         | 0   | 0   | 0  | 0    | 72         | 0   |
| Monaco                        | 0   | 0   | 0  | 0    | 16         | 0   |
| Netherlands                   | 0   | 0   | 0  | 0    | 72         | 0   |
| Norway                        | 0   | 0   | 0  | 0    | 72         | 0   |
| Agder                         | 0   | 0   | 0  | 0    | 70         | 0   |
| Innlandet                     | 0   | 0   | 0  | 0    | 70         | 0   |
| Møre og Romsdal               | 0   | 0   | 0  | 0    | 70         | 0   |
| Nordland                      | 0   | 0   | 0  | 0    | 70         | 0   |
| Oslo                          | 0   | 0   | 0  | 0    | 70         | 0   |
| Rogaland                      | 0   | 0   | 0  | 0    | 70         | 0   |
| Troms og Finnmark             | 0   | 0   | 0  | 0    | 70         | 0   |
| Trøndelag                     | 0   | 0   | 0  | 0    | 70         | 0   |
| Vestfold og Telemark          | 0   | 0   | 0  | 0    | 70         | 0   |
| Vestland                      | 0   | 0   | 0  | 0    | 70         | 0   |
| Viken                         | 0   | 0   | 0  | 0    | 70         | 0   |
| Portugal                      | 1   | 1   | 0  | 0    | 71         | 0   |
| San Marino                    | 0   | 0   | 0  | 0    | 53         | 0   |
| Spain                         | 0   | 0   | 0  | 0    | 72         | 0   |

**Appendix Table 3. Number of all-cause mortality data sources by type and location, 1950-2021**

| Location                | SBH | CBH | HH | SIBS | VR/SRS/DSP | DSS |
|-------------------------|-----|-----|----|------|------------|-----|
| Sweden                  | 0   | 0   | 0  | 0    | 72         | 0   |
| Stockholm               | 0   | 0   | 0  | 0    | 38         | 0   |
| Sweden except Stockholm | 0   | 0   | 0  | 0    | 39         | 0   |
| Switzerland             | 1   | 0   | 0  | 0    | 72         | 0   |
| UK                      | 0   | 0   | 0  | 0    | 72         | 0   |
| England                 | 0   | 0   | 0  | 0    | 41         | 0   |
| East Midlands           | 0   | 0   | 0  | 0    | 40         | 0   |
| Derby                   | 0   | 0   | 0  | 0    | 41         | 0   |
| Derbyshire              | 0   | 0   | 0  | 0    | 41         | 0   |
| Leicester               | 0   | 0   | 0  | 0    | 41         | 0   |
| Leicestershire          | 0   | 0   | 0  | 0    | 41         | 0   |
| Lincolnshire            | 0   | 0   | 0  | 0    | 41         | 0   |
| Northamptonshire        | 0   | 0   | 0  | 0    | 40         | 0   |
| Nottingham              | 0   | 0   | 0  | 0    | 41         | 0   |
| Nottinghamshire         | 0   | 0   | 0  | 0    | 41         | 0   |
| Rutland                 | 0   | 0   | 0  | 0    | 41         | 0   |
| East of England         | 0   | 0   | 0  | 0    | 40         | 0   |
| Bedford                 | 0   | 0   | 0  | 0    | 41         | 0   |
| Cambridgeshire          | 0   | 0   | 0  | 0    | 41         | 0   |
| Central Bedfordshire    | 0   | 0   | 0  | 0    | 41         | 0   |
| Essex                   | 0   | 0   | 0  | 0    | 41         | 0   |
| Hertfordshire           | 0   | 0   | 0  | 0    | 41         | 0   |
| Luton                   | 0   | 0   | 0  | 0    | 41         | 0   |
| Norfolk                 | 0   | 0   | 0  | 0    | 41         | 0   |
| Peterborough            | 0   | 0   | 0  | 0    | 41         | 0   |
| Southend-on-Sea         | 0   | 0   | 0  | 0    | 41         | 0   |
| Suffolk                 | 0   | 0   | 0  | 0    | 41         | 0   |
| Thurrock                | 0   | 0   | 0  | 0    | 41         | 0   |
| Greater London          | 0   | 0   | 0  | 0    | 40         | 0   |
| Barking and Dagenham    | 0   | 0   | 0  | 0    | 41         | 0   |
| Barnet                  | 0   | 0   | 0  | 0    | 41         | 0   |
| Bexley                  | 0   | 0   | 0  | 0    | 41         | 0   |
| Brent                   | 0   | 0   | 0  | 0    | 41         | 0   |
| Bromley                 | 0   | 0   | 0  | 0    | 41         | 0   |
| Camden                  | 0   | 0   | 0  | 0    | 41         | 0   |
| Croydon                 | 0   | 0   | 0  | 0    | 41         | 0   |
| Ealing                  | 0   | 0   | 0  | 0    | 41         | 0   |
| Enfield                 | 0   | 0   | 0  | 0    | 41         | 0   |
| Greenwich               | 0   | 0   | 0  | 0    | 41         | 0   |
| Hackney                 | 0   | 0   | 0  | 0    | 40         | 0   |
| Hammersmith and Fulham  | 0   | 0   | 0  | 0    | 41         | 0   |
| Haringey                | 0   | 0   | 0  | 0    | 41         | 0   |
| Harrow                  | 0   | 0   | 0  | 0    | 41         | 0   |
| Havering                | 0   | 0   | 0  | 0    | 41         | 0   |
| Hillingdon              | 0   | 0   | 0  | 0    | 41         | 0   |
| Hounslow                | 0   | 0   | 0  | 0    | 41         | 0   |
| Islington               | 0   | 0   | 0  | 0    | 41         | 0   |
| Kensington and Chelsea  | 0   | 0   | 0  | 0    | 41         | 0   |
| Kingston upon Thames    | 0   | 0   | 0  | 0    | 41         | 0   |
| Lambeth                 | 0   | 0   | 0  | 0    | 41         | 0   |
| Lewisham                | 0   | 0   | 0  | 0    | 41         | 0   |
| Merton                  | 0   | 0   | 0  | 0    | 41         | 0   |
| Newham                  | 0   | 0   | 0  | 0    | 41         | 0   |
| Redbridge               | 0   | 0   | 0  | 0    | 41         | 0   |
| Richmond upon Thames    | 0   | 0   | 0  | 0    | 41         | 0   |
| Southwark               | 0   | 0   | 0  | 0    | 41         | 0   |
| Sutton                  | 0   | 0   | 0  | 0    | 41         | 0   |
| Tower Hamlets           | 0   | 0   | 0  | 0    | 41         | 0   |
| Waltham Forest          | 0   | 0   | 0  | 0    | 41         | 0   |
| Wandsworth              | 0   | 0   | 0  | 0    | 41         | 0   |
| Westminster             | 0   | 0   | 0  | 0    | 41         | 0   |
| North East England      | 0   | 0   | 0  | 0    | 40         | 0   |
| County Durham           | 0   | 0   | 0  | 0    | 41         | 0   |
| Darlington              | 0   | 0   | 0  | 0    | 41         | 0   |

**Appendix Table 3. Number of all-cause mortality data sources by type and location, 1950-2021**

| Location                     | SBH | CBH | HH | SIBS | VR/SRS/DSP | DSS |
|------------------------------|-----|-----|----|------|------------|-----|
| Gateshead                    | 0   | 0   | 0  | 0    | 41         | 0   |
| Hartlepool                   | 0   | 0   | 0  | 0    | 41         | 0   |
| Middlesbrough                | 0   | 0   | 0  | 0    | 41         | 0   |
| Newcastle upon Tyne          | 0   | 0   | 0  | 0    | 41         | 0   |
| North Tyneside               | 0   | 0   | 0  | 0    | 41         | 0   |
| Northumberland               | 0   | 0   | 0  | 0    | 41         | 0   |
| Redcar and Cleveland         | 0   | 0   | 0  | 0    | 41         | 0   |
| South Tyneside               | 0   | 0   | 0  | 0    | 41         | 0   |
| Stockton-on-Tees             | 0   | 0   | 0  | 0    | 41         | 0   |
| Sunderland                   | 0   | 0   | 0  | 0    | 41         | 0   |
| North West England           | 0   | 0   | 0  | 0    | 40         | 0   |
| Blackburn with Darwen        | 0   | 0   | 0  | 0    | 41         | 0   |
| Blackpool                    | 0   | 0   | 0  | 0    | 41         | 0   |
| Bolton                       | 0   | 0   | 0  | 0    | 41         | 0   |
| Bury                         | 0   | 0   | 0  | 0    | 41         | 0   |
| Cheshire East                | 0   | 0   | 0  | 0    | 41         | 0   |
| Cheshire West and Chester    | 0   | 0   | 0  | 0    | 41         | 0   |
| Cumbria                      | 0   | 0   | 0  | 0    | 41         | 0   |
| Halton                       | 0   | 0   | 0  | 0    | 41         | 0   |
| Knowsley                     | 0   | 0   | 0  | 0    | 41         | 0   |
| Lancashire                   | 0   | 0   | 0  | 0    | 41         | 0   |
| Liverpool                    | 0   | 0   | 0  | 0    | 41         | 0   |
| Manchester                   | 0   | 0   | 0  | 0    | 41         | 0   |
| Oldham                       | 0   | 0   | 0  | 0    | 41         | 0   |
| Rochdale                     | 0   | 0   | 0  | 0    | 41         | 0   |
| Salford                      | 0   | 0   | 0  | 0    | 41         | 0   |
| Sefton                       | 0   | 0   | 0  | 0    | 41         | 0   |
| St Helens                    | 0   | 0   | 0  | 0    | 41         | 0   |
| Stockport                    | 0   | 0   | 0  | 0    | 41         | 0   |
| Tameside                     | 0   | 0   | 0  | 0    | 41         | 0   |
| Trafford                     | 0   | 0   | 0  | 0    | 41         | 0   |
| Warrington                   | 0   | 0   | 0  | 0    | 41         | 0   |
| Wigan                        | 0   | 0   | 0  | 0    | 41         | 0   |
| Wirral                       | 0   | 0   | 0  | 0    | 41         | 0   |
| South East England           | 0   | 0   | 0  | 0    | 40         | 0   |
| Bracknell Forest             | 0   | 0   | 0  | 0    | 41         | 0   |
| Brighton and Hove            | 0   | 0   | 0  | 0    | 41         | 0   |
| Buckinghamshire              | 0   | 0   | 0  | 0    | 41         | 0   |
| East Sussex                  | 0   | 0   | 0  | 0    | 41         | 0   |
| Hampshire                    | 0   | 0   | 0  | 0    | 41         | 0   |
| Isle of Wight                | 0   | 0   | 0  | 0    | 41         | 0   |
| Kent                         | 0   | 0   | 0  | 0    | 41         | 0   |
| Medway                       | 0   | 0   | 0  | 0    | 41         | 0   |
| Milton Keynes                | 0   | 0   | 0  | 0    | 41         | 0   |
| Oxfordshire                  | 0   | 0   | 0  | 0    | 41         | 0   |
| Portsmouth                   | 0   | 0   | 0  | 0    | 41         | 0   |
| Reading                      | 0   | 0   | 0  | 0    | 41         | 0   |
| Slough                       | 0   | 0   | 0  | 0    | 41         | 0   |
| Southampton                  | 0   | 0   | 0  | 0    | 41         | 0   |
| Surrey                       | 0   | 0   | 0  | 0    | 41         | 0   |
| West Berkshire               | 0   | 0   | 0  | 0    | 41         | 0   |
| West Sussex                  | 0   | 0   | 0  | 0    | 41         | 0   |
| Windsor and Maidenhead       | 0   | 0   | 0  | 0    | 41         | 0   |
| Wokingham                    | 0   | 0   | 0  | 0    | 41         | 0   |
| South West England           | 0   | 0   | 0  | 0    | 40         | 0   |
| Bath and North East Somerset | 0   | 0   | 0  | 0    | 41         | 0   |
| Bournemouth                  | 0   | 0   | 0  | 0    | 40         | 0   |
| Bristol, City of             | 0   | 0   | 0  | 0    | 41         | 0   |
| Cornwall                     | 0   | 0   | 0  | 0    | 41         | 0   |
| Devon                        | 0   | 0   | 0  | 0    | 41         | 0   |
| Dorset                       | 0   | 0   | 0  | 0    | 41         | 0   |
| Gloucestershire              | 0   | 0   | 0  | 0    | 41         | 0   |
| North Somerset               | 0   | 0   | 0  | 0    | 41         | 0   |
| Plymouth                     | 0   | 0   | 0  | 0    | 41         | 0   |

**Appendix Table 3. Number of all-cause mortality data sources by type and location, 1950-2021**

| Location                         | SBH | CBH | HH | SIBS | VR/SRS/DSP | DSS |
|----------------------------------|-----|-----|----|------|------------|-----|
| Poole                            | 0   | 0   | 0  | 0    | 40         | 0   |
| Somerset                         | 0   | 0   | 0  | 0    | 41         | 0   |
| South Gloucestershire            | 0   | 0   | 0  | 0    | 41         | 0   |
| Swindon                          | 0   | 0   | 0  | 0    | 41         | 0   |
| Torbay                           | 0   | 0   | 0  | 0    | 41         | 0   |
| Wiltshire                        | 0   | 0   | 0  | 0    | 41         | 0   |
| West Midlands                    | 0   | 0   | 0  | 0    | 40         | 0   |
| Birmingham                       | 0   | 0   | 0  | 0    | 41         | 0   |
| Coventry                         | 0   | 0   | 0  | 0    | 41         | 0   |
| Dudley                           | 0   | 0   | 0  | 0    | 41         | 0   |
| Herefordshire, County of         | 0   | 0   | 0  | 0    | 41         | 0   |
| Sandwell                         | 0   | 0   | 0  | 0    | 41         | 0   |
| Shropshire                       | 0   | 0   | 0  | 0    | 41         | 0   |
| Solihull                         | 0   | 0   | 0  | 0    | 41         | 0   |
| Staffordshire                    | 0   | 0   | 0  | 0    | 41         | 0   |
| Stoke-on-Trent                   | 0   | 0   | 0  | 0    | 41         | 0   |
| Telford and Wrekin               | 0   | 0   | 0  | 0    | 41         | 0   |
| Walsall                          | 0   | 0   | 0  | 0    | 41         | 0   |
| Warwickshire                     | 0   | 0   | 0  | 0    | 41         | 0   |
| Wolverhampton                    | 0   | 0   | 0  | 0    | 41         | 0   |
| Worcestershire                   | 0   | 0   | 0  | 0    | 41         | 0   |
| Yorkshire and the Humber         | 0   | 0   | 0  | 0    | 40         | 0   |
| Barnsley                         | 0   | 0   | 0  | 0    | 41         | 0   |
| Bradford                         | 0   | 0   | 0  | 0    | 41         | 0   |
| Calderdale                       | 0   | 0   | 0  | 0    | 41         | 0   |
| Doncaster                        | 0   | 0   | 0  | 0    | 41         | 0   |
| East Riding of Yorkshire         | 0   | 0   | 0  | 0    | 41         | 0   |
| Kingston upon Hull, City of      | 0   | 0   | 0  | 0    | 41         | 0   |
| Kirklees                         | 0   | 0   | 0  | 0    | 41         | 0   |
| Leeds                            | 0   | 0   | 0  | 0    | 41         | 0   |
| North East Lincolnshire          | 0   | 0   | 0  | 0    | 41         | 0   |
| North Lincolnshire               | 0   | 0   | 0  | 0    | 41         | 0   |
| North Yorkshire                  | 0   | 0   | 0  | 0    | 41         | 0   |
| Rotherham                        | 0   | 0   | 0  | 0    | 41         | 0   |
| Sheffield                        | 0   | 0   | 0  | 0    | 41         | 0   |
| Wakefield                        | 0   | 0   | 0  | 0    | 41         | 0   |
| York                             | 0   | 0   | 0  | 0    | 41         | 0   |
| Northern Ireland                 | 0   | 0   | 0  | 0    | 71         | 0   |
| Scotland                         | 0   | 0   | 0  | 0    | 73         | 0   |
| Wales                            | 0   | 0   | 0  | 0    | 41         | 0   |
| Bolivia                          | 26  | 6   | 1  | 3    | 12         | 0   |
| Ecuador                          | 17  | 7   | 1  | 0    | 67         | 0   |
| Peru                             | 21  | 14  | 0  | 5    | 68         | 0   |
| Antigua and Barbuda              | 0   | 0   | 0  | 0    | 61         | 0   |
| The Bahamas                      | 0   | 0   | 0  | 0    | 50         | 0   |
| Barbados                         | 0   | 0   | 0  | 0    | 62         | 0   |
| Belize                           | 7   | 3   | 0  | 0    | 69         | 0   |
| Bermuda                          | 1   | 0   | 0  | 0    | 70         | 0   |
| Cuba                             | 1   | 0   | 0  | 0    | 62         | 0   |
| Dominica                         | 0   | 0   | 0  | 0    | 64         | 0   |
| Dominican Republic               | 15  | 13  | 1  | 2    | 67         | 0   |
| Grenada                          | 0   | 0   | 0  | 0    | 57         | 0   |
| Guyana                           | 7   | 4   | 1  | 0    | 46         | 0   |
| Haiti                            | 9   | 7   | 3  | 2    | 1          | 0   |
| Jamaica                          | 5   | 1   | 2  | 0    | 51         | 0   |
| Puerto Rico                      | 1   | 1   | 0  | 0    | 71         | 0   |
| Saint Kitts and Nevis            | 0   | 0   | 0  | 0    | 66         | 0   |
| Saint Lucia                      | 0   | 0   | 0  | 0    | 57         | 0   |
| Saint Vincent and the Grenadines | 0   | 0   | 0  | 0    | 53         | 0   |
| Suriname                         | 2   | 0   | 1  | 0    | 61         | 0   |
| Trinidad and Tobago              | 5   | 2   | 0  | 0    | 67         | 0   |
| Virgin Islands                   | 0   | 0   | 0  | 0    | 54         | 0   |
| Colombia                         | 13  | 8   | 0  | 0    | 69         | 0   |
| Costa Rica                       | 7   | 3   | 0  | 0    | 71         | 0   |

**Appendix Table 3. Number of all-cause mortality data sources by type and location, 1950-2021**

| Location                        | SBH | CBH | HH | SIBS | VR/SRS/DSP | DSS |
|---------------------------------|-----|-----|----|------|------------|-----|
| El Salvador                     | 10  | 6   | 2  | 3    | 70         | 0   |
| Guatemala                       | 10  | 6   | 0  | 0    | 70         | 0   |
| Honduras                        | 12  | 5   | 3  | 1    | 44         | 0   |
| Mexico                          | 25  | 2   | 1  | 0    | 72         | 0   |
| Aguascalientes                  | 16  | 1   | 0  | 0    | 43         | 0   |
| Baja California                 | 16  | 1   | 0  | 0    | 43         | 0   |
| Baja California Sur             | 16  | 1   | 0  | 0    | 43         | 0   |
| Campeche                        | 16  | 1   | 0  | 0    | 43         | 0   |
| Chiapas                         | 16  | 1   | 0  | 0    | 43         | 0   |
| Chihuahua                       | 16  | 1   | 0  | 0    | 43         | 0   |
| Coahuila                        | 16  | 1   | 0  | 0    | 43         | 0   |
| Colima                          | 16  | 1   | 0  | 0    | 43         | 0   |
| Durango                         | 16  | 1   | 0  | 0    | 43         | 0   |
| Guanajuato                      | 16  | 1   | 0  | 0    | 43         | 0   |
| Guerrero                        | 16  | 1   | 0  | 0    | 43         | 0   |
| Hidalgo                         | 14  | 1   | 0  | 0    | 43         | 0   |
| Jalisco                         | 16  | 1   | 0  | 0    | 43         | 0   |
| México                          | 16  | 1   | 0  | 0    | 43         | 0   |
| Mexico City                     | 16  | 1   | 0  | 0    | 43         | 0   |
| Michoacán de Ocampo             | 16  | 1   | 0  | 0    | 43         | 0   |
| Morelos                         | 16  | 1   | 0  | 0    | 43         | 0   |
| Nayarit                         | 16  | 1   | 0  | 0    | 43         | 0   |
| Nuevo León                      | 16  | 1   | 0  | 0    | 43         | 0   |
| Oaxaca                          | 16  | 1   | 0  | 0    | 43         | 0   |
| Puebla                          | 16  | 1   | 0  | 0    | 43         | 0   |
| Querétaro                       | 16  | 1   | 0  | 0    | 43         | 0   |
| Quintana Roo                    | 16  | 1   | 0  | 0    | 43         | 0   |
| San Luis Potosí                 | 16  | 1   | 0  | 0    | 43         | 0   |
| Sinaloa                         | 16  | 1   | 0  | 0    | 43         | 0   |
| Sonora                          | 16  | 1   | 0  | 0    | 43         | 0   |
| Tabasco                         | 16  | 1   | 0  | 0    | 43         | 0   |
| Tamaulipas                      | 16  | 1   | 0  | 0    | 43         | 0   |
| Tlaxcala                        | 16  | 1   | 0  | 0    | 43         | 0   |
| Veracruz de Ignacio de la Llave | 16  | 1   | 0  | 0    | 43         | 0   |
| Yucatán                         | 16  | 1   | 0  | 0    | 43         | 0   |
| Zacatecas                       | 16  | 1   | 0  | 0    | 43         | 0   |
| Nicaragua                       | 12  | 5   | 0  | 0    | 57         | 0   |
| Panama                          | 9   | 1   | 0  | 0    | 70         | 0   |
| Venezuela                       | 4   | 1   | 1  | 0    | 67         | 0   |
| Brazil                          | 28  | 2   | 1  | 0    | 48         | 0   |
| Acre                            | 9   | 1   | 1  | 0    | 43         | 0   |
| Alagoas                         | 21  | 2   | 1  | 0    | 43         | 0   |
| Amapá                           | 9   | 1   | 1  | 0    | 43         | 0   |
| Amazonas                        | 10  | 1   | 1  | 0    | 43         | 0   |
| Bahia                           | 21  | 2   | 1  | 0    | 43         | 0   |
| Ceará                           | 21  | 2   | 1  | 0    | 43         | 0   |
| Distrito Federal                | 21  | 1   | 1  | 0    | 43         | 0   |
| Espírito Santo                  | 21  | 1   | 1  | 0    | 43         | 0   |
| Goiás                           | 21  | 1   | 1  | 0    | 43         | 0   |
| Maranhão                        | 21  | 2   | 1  | 0    | 43         | 0   |
| Mato Grosso                     | 21  | 1   | 1  | 0    | 43         | 0   |
| Mato Grosso do Sul              | 21  | 1   | 1  | 0    | 43         | 0   |
| Minas Gerais                    | 21  | 1   | 1  | 0    | 43         | 0   |
| Pará                            | 10  | 1   | 1  | 0    | 43         | 0   |
| Paraíba                         | 21  | 2   | 1  | 0    | 42         | 0   |
| Paraná                          | 21  | 1   | 1  | 0    | 43         | 0   |
| Pernambuco                      | 21  | 2   | 1  | 0    | 43         | 0   |
| Piauí                           | 21  | 2   | 1  | 0    | 43         | 0   |
| Rio de Janeiro                  | 21  | 1   | 1  | 0    | 43         | 0   |
| Rio Grande do Norte             | 21  | 2   | 1  | 0    | 43         | 0   |
| Rio Grande do Sul               | 21  | 1   | 1  | 0    | 43         | 0   |
| Rondônia                        | 9   | 1   | 1  | 0    | 43         | 0   |
| Roraima                         | 9   | 1   | 1  | 0    | 43         | 0   |
| Santa Catarina                  | 21  | 1   | 1  | 0    | 43         | 0   |

**Appendix Table 3. Number of all-cause mortality data sources by type and location, 1950-2021**

| Location                    | SBH | CBH | HH | SIBS | VR/SRS/DSP | DSS |
|-----------------------------|-----|-----|----|------|------------|-----|
| São Paulo                   | 20  | 1   | 1  | 0    | 43         | 0   |
| Sergipe                     | 21  | 2   | 1  | 0    | 43         | 0   |
| Tocantins                   | 9   | 1   | 1  | 0    | 33         | 0   |
| Paraguay                    | 15  | 7   | 0  | 0    | 71         | 0   |
| Afghanistan                 | 6   | 1   | 1  | 0    | 0          | 0   |
| Algeria                     | 5   | 3   | 1  | 0    | 25         | 0   |
| Bahrain                     | 4   | 0   | 2  | 0    | 39         | 0   |
| Egypt                       | 13  | 11  | 2  | 0    | 68         | 0   |
| Iran                        | 5   | 1   | 9  | 0    | 33         | 0   |
| Alborz                      | 3   | 1   | 6  | 0    | 16         | 0   |
| Ardebil                     | 3   | 1   | 6  | 0    | 16         | 0   |
| Bushehr                     | 3   | 1   | 6  | 0    | 16         | 0   |
| Chahar Mahaal and Bakhtiari | 3   | 1   | 6  | 0    | 16         | 0   |
| East Azarbayegan            | 3   | 1   | 6  | 0    | 16         | 0   |
| Fars                        | 3   | 1   | 6  | 0    | 16         | 0   |
| Gilan                       | 3   | 1   | 6  | 0    | 16         | 0   |
| Golestan                    | 3   | 1   | 6  | 0    | 16         | 0   |
| Hamadan                     | 3   | 1   | 6  | 0    | 16         | 0   |
| Hormozgan                   | 3   | 1   | 6  | 0    | 16         | 0   |
| Ilam                        | 3   | 1   | 6  | 0    | 16         | 0   |
| Isfahan                     | 3   | 1   | 6  | 0    | 16         | 0   |
| Kerman                      | 3   | 1   | 6  | 0    | 16         | 0   |
| Kermanshah                  | 3   | 1   | 6  | 0    | 16         | 0   |
| Khorasan-e-Razavi           | 3   | 1   | 6  | 0    | 16         | 0   |
| Khuzestan                   | 3   | 1   | 6  | 0    | 16         | 0   |
| Kohgiluyeh and Boyer-Ahmad  | 3   | 1   | 6  | 0    | 16         | 0   |
| Kurdistan                   | 3   | 1   | 6  | 0    | 16         | 0   |
| Lorestan                    | 3   | 1   | 6  | 0    | 16         | 0   |
| Markazi                     | 3   | 1   | 6  | 0    | 16         | 0   |
| Mazandaran                  | 3   | 1   | 6  | 0    | 16         | 0   |
| North Khorasan              | 3   | 1   | 6  | 0    | 16         | 0   |
| Qazvin                      | 3   | 1   | 6  | 0    | 16         | 0   |
| Qom                         | 3   | 1   | 6  | 0    | 16         | 0   |
| Semnan                      | 3   | 1   | 6  | 0    | 16         | 0   |
| Sistan and Baluchistan      | 3   | 1   | 4  | 0    | 16         | 0   |
| South Khorasan              | 3   | 1   | 6  | 0    | 16         | 0   |
| Tehran                      | 3   | 1   | 0  | 0    | 16         | 0   |
| West Azarbayegan            | 3   | 1   | 6  | 0    | 16         | 0   |
| Yazd                        | 3   | 1   | 6  | 0    | 16         | 0   |
| Zanjan                      | 3   | 1   | 6  | 0    | 16         | 0   |
| Iraq                        | 7   | 5   | 4  | 0    | 25         | 1   |
| Jordan                      | 12  | 7   | 1  | 1    | 26         | 0   |
| Kuwait                      | 3   | 0   | 1  | 0    | 58         | 0   |
| Lebanon                     | 4   | 2   | 1  | 1    | 11         | 0   |
| Libya                       | 4   | 1   | 0  | 0    | 17         | 0   |
| Morocco                     | 9   | 6   | 2  | 2    | 11         | 0   |
| Oman                        | 4   | 0   | 2  | 0    | 16         | 0   |
| Palestine                   | 8   | 4   | 4  | 0    | 20         | 0   |
| Qatar                       | 1   | 0   | 2  | 0    | 40         | 0   |
| Saudi Arabia                | 2   | 0   | 4  | 0    | 12         | 0   |
| Sudan                       | 9   | 5   | 2  | 1    | 0          | 0   |
| Syria                       | 6   | 4   | 1  | 0    | 31         | 0   |
| Tunisia                     | 7   | 5   | 2  | 0    | 21         | 0   |
| Türkiye                     | 14  | 5   | 3  | 0    | 39         | 0   |
| United Arab Emirates        | 2   | 0   | 6  | 0    | 16         | 0   |
| Yemen                       | 7   | 5   | 2  | 0    | 0          | 0   |
| Bangladesh                  | 14  | 9   | 4  | 3    | 42         | 2   |
| Bhutan                      | 4   | 0   | 1  | 1    | 0          | 0   |
| India                       | 12  | 4   | 0  | 0    | 59         | 0   |
| Nepal                       | 12  | 7   | 5  | 2    | 0          | 0   |
| Pakistan                    | 14  | 8   | 9  | 0    | 23         | 0   |
| Azad Jammu & Kashmir        | 1   | 0   | 0  | 0    | 0          | 0   |
| Balochistan                 | 5   | 5   | 0  | 0    | 0          | 0   |
| Gilgit-Baltistan            | 2   | 2   | 0  | 0    | 0          | 0   |

**Appendix Table 3. Number of all-cause mortality data sources by type and location, 1950-2021**

| Location                       | SBH | CBH | HH | SIBS | VR/SRS/DSP | DSS |
|--------------------------------|-----|-----|----|------|------------|-----|
| Islamabad Capital Territory    | 0   | 1   | 0  | 0    | 0          | 0   |
| Khyber Pakhtunkhwa             | 4   | 5   | 1  | 0    | 0          | 0   |
| Punjab                         | 7   | 5   | 1  | 0    | 0          | 0   |
| Sindh                          | 5   | 5   | 1  | 0    | 0          | 0   |
| China                          | 5   | 0   | 31 | 0    | 23         | 0   |
| North Korea                    | 0   | 0   | 2  | 0    | 0          | 0   |
| Taiwan (province of China)     | 0   | 0   | 0  | 0    | 67         | 0   |
| American Samoa                 | 1   | 0   | 0  | 0    | 55         | 0   |
| Cook Islands                   | 1   | 0   | 0  | 0    | 45         | 0   |
| Fiji                           | 7   | 1   | 0  | 0    | 55         | 0   |
| Guam                           | 0   | 0   | 0  | 0    | 70         | 0   |
| Kiribati                       | 7   | 0   | 2  | 0    | 12         | 0   |
| Marshall Islands               | 2   | 0   | 1  | 0    | 14         | 0   |
| Federated States of Micronesia | 3   | 0   | 0  | 0    | 1          | 0   |
| Nauru                          | 2   | 0   | 2  | 0    | 17         | 0   |
| Niue                           | 0   | 0   | 0  | 0    | 43         | 0   |
| Northern Mariana Islands       | 0   | 0   | 0  | 0    | 24         | 0   |
| Palau                          | 2   | 0   | 0  | 0    | 6          | 0   |
| Papua New Guinea               | 8   | 1   | 3  | 1    | 2          | 0   |
| Samoa                          | 5   | 0   | 6  | 0    | 23         | 0   |
| Solomon Islands                | 4   | 0   | 2  | 0    | 0          | 0   |
| Tokelau                        | 0   | 0   | 1  | 0    | 11         | 0   |
| Tonga                          | 3   | 0   | 3  | 0    | 18         | 0   |
| Tuvalu                         | 1   | 0   | 3  | 0    | 13         | 0   |
| Vanuatu                        | 4   | 0   | 1  | 0    | 1          | 0   |
| Cambodia                       | 11  | 5   | 1  | 4    | 0          | 0   |
| Indonesia                      | 46  | 15  | 3  | 5    | 0          | 0   |
| Aceh                           | 32  | 4   | 2  | 4    | 0          | 0   |
| Bali                           | 36  | 5   | 6  | 5    | 0          | 0   |
| Bangka-Belitung Islands        | 25  | 4   | 5  | 4    | 0          | 0   |
| Banten                         | 33  | 4   | 4  | 4    | 0          | 0   |
| Bengkulu                       | 36  | 5   | 5  | 5    | 0          | 0   |
| Gorontalo                      | 22  | 4   | 5  | 5    | 0          | 0   |
| Jakarta                        | 40  | 5   | 4  | 5    | 0          | 0   |
| Jambi                          | 34  | 4   | 6  | 5    | 0          | 0   |
| West Java                      | 40  | 5   | 6  | 5    | 0          | 0   |
| Central Java                   | 40  | 5   | 6  | 5    | 0          | 0   |
| East Java                      | 40  | 5   | 6  | 5    | 0          | 0   |
| West Kalimantan                | 36  | 5   | 6  | 5    | 0          | 0   |
| South Kalimantan               | 40  | 5   | 6  | 5    | 0          | 0   |
| Central Kalimantan             | 36  | 4   | 4  | 5    | 0          | 0   |
| East Kalimantan                | 34  | 4   | 6  | 5    | 0          | 0   |
| North Kalimantan               | 17  | 2   | 3  | 0    | 0          | 0   |
| Riau Islands                   | 29  | 3   | 4  | 5    | 0          | 0   |
| Lampung                        | 39  | 5   | 4  | 5    | 0          | 0   |
| Maluku                         | 33  | 3   | 0  | 4    | 0          | 0   |
| North Maluku                   | 24  | 3   | 4  | 3    | 0          | 0   |
| West Nusa Tenggara             | 40  | 5   | 4  | 5    | 0          | 0   |
| East Nusa Tenggara             | 34  | 4   | 6  | 5    | 0          | 0   |
| Papua                          | 30  | 2   | 3  | 4    | 0          | 0   |
| West Papua                     | 29  | 2   | 4  | 4    | 0          | 0   |
| Riau                           | 37  | 5   | 6  | 5    | 0          | 0   |
| West Sulawesi                  | 30  | 3   | 5  | 3    | 0          | 0   |
| South Sulawesi                 | 40  | 5   | 6  | 5    | 0          | 0   |
| Central Sulawesi               | 36  | 5   | 5  | 5    | 0          | 0   |
| Southeast Sulawesi             | 35  | 5   | 4  | 5    | 0          | 0   |
| North Sulawesi                 | 36  | 5   | 5  | 5    | 0          | 0   |
| West Sumatra                   | 40  | 5   | 4  | 5    | 0          | 0   |
| South Sumatra                  | 40  | 5   | 6  | 5    | 0          | 0   |
| North Sumatra                  | 40  | 5   | 3  | 5    | 0          | 0   |
| Yogyakarta                     | 40  | 5   | 6  | 5    | 0          | 0   |
| Laos                           | 4   | 2   | 1  | 1    | 0          | 0   |
| Malaysia                       | 3   | 1   | 0  | 0    | 58         | 0   |
| Maldives                       | 7   | 2   | 1  | 0    | 44         | 0   |



**Appendix Table 3. Number of all-cause mortality data sources by type and location, 1950-2021**

| Location                  | SBH | CBH | HH | SIBS | VR/SRS/DSP | DSS |
|---------------------------|-----|-----|----|------|------------|-----|
| Mauritius                 | 0   | 0   | 0  | 0    | 71         | 0   |
| Myanmar                   | 6   | 1   | 2  | 1    | 2          | 0   |
| Philippines               | 13  | 7   | 0  | 0    | 69         | 0   |
| Abra                      | 3   | 5   | 0  | 0    | 20         | 0   |
| Agusan Del Norte          | 3   | 5   | 0  | 0    | 20         | 0   |
| Agusan Del Sur            | 3   | 5   | 0  | 0    | 20         | 0   |
| Aklan                     | 3   | 5   | 0  | 0    | 26         | 0   |
| Albay                     | 3   | 5   | 0  | 0    | 26         | 0   |
| Antique                   | 3   | 5   | 0  | 0    | 26         | 0   |
| Apayao                    | 3   | 4   | 0  | 0    | 14         | 0   |
| Aurora                    | 3   | 5   | 0  | 0    | 14         | 0   |
| Basilan                   | 3   | 5   | 0  | 0    | 19         | 0   |
| Bataan                    | 3   | 5   | 0  | 0    | 26         | 0   |
| Batanes                   | 3   | 2   | 0  | 0    | 26         | 0   |
| Batangas                  | 3   | 5   | 0  | 0    | 26         | 0   |
| Benguet                   | 3   | 5   | 0  | 0    | 25         | 0   |
| Biliran                   | 3   | 4   | 0  | 0    | 14         | 0   |
| Bohol                     | 3   | 5   | 0  | 0    | 26         | 0   |
| Bukidnon                  | 3   | 5   | 0  | 0    | 26         | 0   |
| Bulacan                   | 3   | 5   | 0  | 0    | 26         | 0   |
| Cagayan                   | 3   | 5   | 0  | 0    | 26         | 0   |
| Camarines Norte           | 3   | 5   | 0  | 0    | 26         | 0   |
| Camarines Sur             | 3   | 5   | 0  | 0    | 26         | 0   |
| Camiguin                  | 3   | 3   | 0  | 0    | 25         | 0   |
| Capiz                     | 3   | 4   | 0  | 0    | 26         | 0   |
| Catanduanes               | 3   | 5   | 0  | 0    | 26         | 0   |
| Cavite                    | 3   | 5   | 0  | 0    | 26         | 0   |
| Cebu                      | 3   | 5   | 0  | 0    | 26         | 0   |
| Cotabato (North Cotabato) | 3   | 5   | 0  | 0    | 26         | 0   |
| Davao de Oro              | 2   | 5   | 0  | 0    | 14         | 0   |
| Davao Del Norte           | 3   | 5   | 0  | 0    | 25         | 0   |
| Davao Del Sur             | 3   | 5   | 0  | 0    | 25         | 0   |
| Davao Occidental          | 3   | 1   | 0  | 0    | 14         | 0   |
| Davao Oriental            | 3   | 5   | 0  | 0    | 25         | 0   |
| Dinagat Islands           | 2   | 1   | 0  | 0    | 14         | 0   |
| Eastern Samar             | 3   | 5   | 0  | 0    | 25         | 0   |
| Guimaras                  | 3   | 2   | 0  | 0    | 14         | 0   |
| Ifugao                    | 3   | 5   | 0  | 0    | 25         | 0   |
| Ilocos Norte              | 3   | 5   | 0  | 0    | 26         | 0   |
| Ilocos Sur                | 3   | 5   | 0  | 0    | 26         | 0   |
| Iloilo                    | 3   | 5   | 0  | 0    | 26         | 0   |
| Isabela                   | 2   | 5   | 0  | 0    | 26         | 0   |
| Kalinga                   | 3   | 5   | 0  | 0    | 24         | 0   |
| La Union                  | 3   | 5   | 0  | 0    | 26         | 0   |
| Laguna                    | 3   | 5   | 0  | 0    | 26         | 0   |
| Lanao Del Norte           | 3   | 5   | 0  | 0    | 26         | 0   |
| Lanao Del Sur             | 3   | 5   | 0  | 0    | 26         | 0   |
| Leyte                     | 3   | 5   | 0  | 0    | 26         | 0   |
| Maguindanao               | 3   | 5   | 0  | 0    | 19         | 0   |
| Marinduque                | 3   | 5   | 0  | 0    | 26         | 0   |
| Masbate                   | 3   | 5   | 0  | 0    | 26         | 0   |
| Misamis Occidental        | 3   | 5   | 0  | 0    | 26         | 0   |
| Misamis Oriental          | 3   | 5   | 0  | 0    | 26         | 0   |
| Mountain Province         | 3   | 4   | 0  | 0    | 25         | 0   |
| National Capital Region   | 3   | 5   | 0  | 0    | 14         | 0   |
| Negros Occidental         | 3   | 5   | 0  | 0    | 26         | 0   |
| Negros Oriental           | 3   | 2   | 0  | 0    | 26         | 0   |
| Northern Samar            | 3   | 5   | 0  | 0    | 25         | 0   |
| Nueva Ecija               | 3   | 5   | 0  | 0    | 25         | 0   |
| Nueva Vizcaya             | 3   | 5   | 0  | 0    | 25         | 0   |
| Occidental Mindoro        | 3   | 5   | 0  | 0    | 26         | 0   |
| Oriental Mindoro          | 2   | 5   | 0  | 0    | 26         | 0   |
| Palawan                   | 3   | 5   | 0  | 0    | 26         | 0   |
| Pampanga                  | 2   | 5   | 0  | 0    | 26         | 0   |

**Appendix Table 3. Number of all-cause mortality data sources by type and location, 1950-2021**

| Location                                     | SBH | CBH | HH | SIBS | VR/SRS/DSP | DSS |
|----------------------------------------------|-----|-----|----|------|------------|-----|
| Pangasinan                                   | 2   | 5   | 0  | 0    | 26         | 0   |
| Quezon                                       | 3   | 5   | 0  | 0    | 26         | 0   |
| Quirino                                      | 3   | 4   | 0  | 0    | 20         | 0   |
| Rizal                                        | 3   | 5   | 0  | 0    | 18         | 0   |
| Romblon                                      | 3   | 5   | 0  | 0    | 26         | 0   |
| Samar (Western Samar)                        | 3   | 5   | 0  | 0    | 26         | 0   |
| Sarangani                                    | 2   | 5   | 0  | 0    | 14         | 0   |
| Siquijor                                     | 3   | 1   | 0  | 0    | 20         | 0   |
| Sorsogon                                     | 3   | 5   | 0  | 0    | 26         | 0   |
| South Cotabato                               | 3   | 5   | 0  | 0    | 24         | 0   |
| Southern Leyte                               | 3   | 5   | 0  | 0    | 25         | 0   |
| Sultan Kudarat                               | 3   | 5   | 0  | 0    | 19         | 0   |
| Sulu                                         | 3   | 5   | 0  | 0    | 23         | 0   |
| Surigao Del Norte                            | 3   | 5   | 0  | 0    | 26         | 0   |
| Surigao Del Sur                              | 3   | 5   | 0  | 0    | 26         | 0   |
| Tarlac                                       | 3   | 5   | 0  | 0    | 26         | 0   |
| Tawi-Tawi                                    | 3   | 2   | 0  | 0    | 18         | 0   |
| Zambales                                     | 3   | 4   | 0  | 0    | 26         | 0   |
| Zamboanga Del Norte                          | 3   | 5   | 0  | 0    | 26         | 0   |
| Zamboanga Del Sur                            | 3   | 5   | 0  | 0    | 26         | 0   |
| Zamboanga Sibugay                            | 3   | 5   | 0  | 0    | 14         | 0   |
| Seychelles                                   | 2   | 0   | 1  | 0    | 69         | 0   |
| Sri Lanka                                    | 5   | 2   | 4  | 0    | 63         | 0   |
| Thailand                                     | 11  | 2   | 0  | 0    | 69         | 0   |
| Timor-Leste                                  | 9   | 6   | 0  | 4    | 0          | 0   |
| Viet Nam                                     | 16  | 3   | 3  | 0    | 0          | 2   |
| Angola                                       | 4   | 2   | 0  | 1    | 0          | 0   |
| Central African Republic                     | 5   | 1   | 1  | 1    | 0          | 0   |
| Congo (Brazzaville)                          | 5   | 4   | 1  | 2    | 0          | 0   |
| DR Congo                                     | 5   | 2   | 1  | 2    | 0          | 0   |
| Equatorial Guinea                            | 1   | 0   | 1  | 0    | 0          | 0   |
| Gabon                                        | 2   | 2   | 0  | 2    | 0          | 0   |
| Burundi                                      | 8   | 3   | 1  | 2    | 0          | 0   |
| Comoros                                      | 4   | 2   | 2  | 1    | 0          | 0   |
| Djibouti                                     | 3   | 1   | 0  | 0    | 0          | 0   |
| Eritrea                                      | 3   | 2   | 1  | 1    | 0          | 0   |
| Ethiopia                                     | 8   | 5   | 2  | 4    | 0          | 5   |
| Addis Ababa                                  | 3   | 4   | 1  | 2    | 0          | 0   |
| Afar                                         | 4   | 5   | 1  | 2    | 0          | 0   |
| Amhara                                       | 4   | 5   | 1  | 2    | 0          | 0   |
| Benishangul-Gumuz                            | 3   | 4   | 1  | 2    | 0          | 0   |
| Dire Dawa                                    | 4   | 5   | 1  | 2    | 0          | 0   |
| Gambella                                     | 4   | 5   | 1  | 2    | 0          | 0   |
| Harari                                       | 4   | 5   | 1  | 2    | 0          | 0   |
| Oromia                                       | 4   | 4   | 1  | 2    | 0          | 0   |
| Somali                                       | 4   | 5   | 1  | 2    | 0          | 0   |
| Southern Nations, Nationalities, and Peoples | 4   | 4   | 1  | 2    | 0          | 0   |
| Tigray                                       | 4   | 5   | 1  | 2    | 0          | 0   |
| Kenya                                        | 19  | 7   | 1  | 4    | 0          | 4   |
| Baringo                                      | 12  | 5   | 0  | 1    | 0          | 0   |
| Bomet                                        | 9   | 3   | 1  | 1    | 0          | 0   |
| Bungoma                                      | 13  | 7   | 0  | 1    | 0          | 0   |
| Busia                                        | 12  | 6   | 0  | 0    | 0          | 0   |
| Elgeyo Marakwet                              | 12  | 6   | 0  | 1    | 0          | 0   |
| Embu                                         | 14  | 7   | 0  | 0    | 0          | 0   |
| Garissa                                      | 10  | 3   | 0  | 0    | 0          | 0   |
| Homa Bay                                     | 9   | 4   | 0  | 1    | 0          | 0   |
| Isiolo                                       | 11  | 4   | 0  | 0    | 0          | 0   |
| Kajiado                                      | 12  | 5   | 1  | 1    | 0          | 0   |
| Kakamega                                     | 12  | 7   | 0  | 0    | 0          | 0   |
| Kericho                                      | 13  | 6   | 0  | 0    | 0          | 0   |
| Kiambu                                       | 13  | 6   | 0  | 1    | 0          | 0   |
| Kilifi                                       | 13  | 6   | 0  | 1    | 0          | 0   |
| Kirinyaga                                    | 12  | 6   | 0  | 0    | 0          | 0   |

**Appendix Table 3. Number of all-cause mortality data sources by type and location, 1950-2021**

| Location      | SBH | CBH | HH | SIBS | VR/SRS/DSP | DSS |
|---------------|-----|-----|----|------|------------|-----|
| Kisii         | 12  | 7   | 0  | 1    | 0          | 0   |
| Kisumu        | 12  | 7   | 0  | 1    | 0          | 0   |
| Kitui         | 15  | 7   | 0  | 1    | 0          | 0   |
| Kwale         | 12  | 6   | 0  | 1    | 0          | 0   |
| Laikipia      | 13  | 5   | 0  | 0    | 0          | 0   |
| Lamu          | 10  | 4   | 0  | 0    | 0          | 0   |
| Machakos      | 15  | 7   | 0  | 1    | 0          | 0   |
| Makueni       | 11  | 4   | 0  | 1    | 0          | 0   |
| Mandera       | 10  | 3   | 0  | 0    | 0          | 0   |
| Marsabit      | 9   | 4   | 0  | 0    | 0          | 0   |
| Meru          | 12  | 7   | 0  | 1    | 0          | 0   |
| Migori        | 9   | 4   | 0  | 1    | 0          | 0   |
| Mombasa       | 12  | 7   | 0  | 0    | 0          | 0   |
| Murang'a      | 12  | 6   | 1  | 1    | 0          | 0   |
| Nairobi       | 11  | 6   | 0  | 1    | 0          | 0   |
| Nakuru        | 12  | 6   | 0  | 1    | 0          | 0   |
| Nandi         | 13  | 6   | 0  | 1    | 0          | 0   |
| Narok         | 11  | 6   | 0  | 1    | 0          | 0   |
| Nyamira       | 10  | 4   | 0  | 1    | 0          | 0   |
| Nyandarua     | 11  | 6   | 0  | 1    | 0          | 0   |
| Nyeri         | 11  | 6   | 0  | 1    | 0          | 0   |
| Samburu       | 8   | 3   | 0  | 0    | 0          | 0   |
| Siaya         | 13  | 7   | 0  | 1    | 0          | 0   |
| Taita Taveta  | 12  | 6   | 0  | 1    | 0          | 0   |
| Tana River    | 10  | 3   | 0  | 1    | 0          | 0   |
| Tharaka Nithi | 10  | 4   | 0  | 1    | 0          | 0   |
| Trans Nzoia   | 12  | 6   | 0  | 0    | 0          | 0   |
| Turkana       | 9   | 4   | 0  | 1    | 0          | 0   |
| Uasin Gishu   | 12  | 6   | 0  | 1    | 0          | 0   |
| Vihiga        | 9   | 3   | 0  | 1    | 0          | 0   |
| Wajir         | 10  | 3   | 0  | 0    | 0          | 0   |
| West Pokot    | 12  | 5   | 0  | 1    | 0          | 0   |
| Madagascar    | 10  | 4   | 3  | 4    | 14         | 0   |
| Malawi        | 19  | 8   | 9  | 6    | 2          | 1   |
| Mozambique    | 9   | 4   | 1  | 3    | 0          | 1   |
| Rwanda        | 13  | 7   | 2  | 4    | 0          | 0   |
| Somalia       | 2   | 1   | 0  | 0    | 0          | 0   |
| South Sudan   | 2   | 1   | 0  | 0    | 0          | 0   |
| Uganda        | 17  | 7   | 1  | 5    | 0          | 1   |
| Tanzania      | 14  | 7   | 3  | 4    | 0          | 3   |
| Zambia        | 11  | 5   | 10 | 5    | 0          | 0   |
| Botswana      | 9   | 2   | 3  | 0    | 10         | 0   |
| Eswatini      | 4   | 3   | 2  | 1    | 0          | 0   |
| Lesotho       | 10  | 4   | 1  | 3    | 0          | 0   |
| Namibia       | 5   | 4   | 2  | 4    | 0          | 0   |
| South Africa  | 9   | 2   | 10 | 1    | 33         | 3   |
| Eastern Cape  | 7   | 2   | 8  | 1    | 21         | 0   |
| Free State    | 7   | 2   | 8  | 1    | 21         | 0   |
| Gauteng       | 7   | 2   | 4  | 1    | 21         | 0   |
| KwaZulu-Natal | 8   | 2   | 7  | 1    | 21         | 0   |
| Limpopo       | 7   | 2   | 8  | 1    | 21         | 0   |
| Mpumalanga    | 7   | 2   | 6  | 1    | 21         | 0   |
| North West    | 7   | 2   | 7  | 1    | 21         | 0   |
| Northern Cape | 6   | 2   | 6  | 1    | 21         | 0   |
| Western Cape  | 7   | 1   | 7  | 1    | 21         | 0   |
| Zimbabwe      | 9   | 8   | 4  | 6    | 2          | 0   |
| Benin         | 9   | 7   | 2  | 3    | 0          | 0   |
| Burkina Faso  | 12  | 4   | 6  | 3    | 0          | 2   |
| Cabo Verde    | 3   | 1   | 1  | 0    | 24         | 0   |
| Cameroon      | 9   | 6   | 3  | 3    | 0          | 0   |
| Chad          | 5   | 3   | 1  | 3    | 0          | 0   |
| Côte d'Ivoire | 6   | 10  | 1  | 3    | 0          | 1   |
| The Gambia    | 5   | 1   | 4  | 0    | 0          | 1   |
| Ghana         | 20  | 9   | 3  | 1    | 0          | 1   |

**Appendix Table 3. Number of all-cause mortality data sources by type and location, 1950-2021**

| Location              | SBH | CBH | HH | SIBS | VR/SRS/DSP | DSS |
|-----------------------|-----|-----|----|------|------------|-----|
| Guinea                | 4   | 4   | 4  | 3    | 0          | 0   |
| Guinea-Bissau         | 4   | 1   | 1  | 1    | 0          | 0   |
| Liberia               | 7   | 5   | 2  | 2    | 0          | 0   |
| Mali                  | 10  | 6   | 5  | 5    | 0          | 0   |
| Mauritania            | 8   | 5   | 2  | 2    | 0          | 0   |
| Niger                 | 5   | 4   | 0  | 3    | 0          | 0   |
| Nigeria               | 22  | 6   | 1  | 0    | 0          | 0   |
| São Tomé and Príncipe | 6   | 2   | 2  | 2    | 20         | 0   |
| Senegal               | 13  | 13  | 3  | 3    | 0          | 3   |
| Sierra Leone          | 6   | 3   | 2  | 2    | 5          | 0   |
| Togo                  | 8   | 3   | 3  | 2    | 0          | 0   |

**Appendix Table 4. Number of all-cause mortality data sources by type and year, 1950-2021**

| Year | SBH | CBH | HH | SIBS | VR/SRS/DSP | DSS |
|------|-----|-----|----|------|------------|-----|
| 1950 | 0   | 0   | 0  | 0    | 81         | 0   |
| 1951 | 0   | 0   | 0  | 0    | 92         | 0   |
| 1952 | 0   | 0   | 0  | 0    | 98         | 0   |
| 1953 | 0   | 0   | 0  | 0    | 97         | 0   |
| 1954 | 0   | 0   | 0  | 0    | 98         | 0   |
| 1955 | 0   | 1   | 0  | 0    | 106        | 0   |
| 1956 | 2   | 0   | 0  | 0    | 105        | 0   |
| 1957 | 0   | 1   | 0  | 0    | 105        | 0   |
| 1958 | 1   | 0   | 1  | 0    | 114        | 0   |
| 1959 | 0   | 1   | 1  | 0    | 162        | 0   |
| 1960 | 23  | 0   | 2  | 0    | 161        | 0   |
| 1961 | 3   | 1   | 1  | 0    | 160        | 0   |
| 1962 | 0   | 0   | 2  | 0    | 160        | 0   |
| 1963 | 1   | 1   | 2  | 0    | 161        | 0   |
| 1964 | 1   | 2   | 3  | 0    | 163        | 0   |
| 1965 | 1   | 1   | 2  | 0    | 217        | 0   |
| 1966 | 4   | 4   | 0  | 0    | 164        | 0   |
| 1967 | 2   | 2   | 2  | 0    | 160        | 0   |
| 1968 | 1   | 7   | 0  | 0    | 229        | 0   |
| 1969 | 2   | 3   | 0  | 0    | 258        | 0   |
| 1970 | 39  | 10  | 1  | 0    | 245        | 0   |
| 1971 | 39  | 4   | 2  | 0    | 244        | 0   |
| 1972 | 3   | 13  | 1  | 0    | 246        | 0   |
| 1973 | 9   | 5   | 2  | 0    | 247        | 1   |
| 1974 | 8   | 22  | 2  | 0    | 252        | 0   |
| 1975 | 13  | 14  | 0  | 0    | 187        | 0   |
| 1976 | 14  | 24  | 2  | 0    | 260        | 0   |
| 1977 | 8   | 12  | 1  | 0    | 261        | 0   |
| 1978 | 10  | 29  | 0  | 0    | 271        | 0   |
| 1979 | 8   | 11  | 1  | 0    | 358        | 0   |
| 1980 | 114 | 28  | 1  | 0    | 312        | 0   |
| 1981 | 17  | 7   | 2  | 0    | 478        | 0   |
| 1982 | 38  | 27  | 7  | 0    | 482        | 0   |
| 1983 | 5   | 10  | 1  | 0    | 480        | 0   |
| 1984 | 8   | 30  | 23 | 0    | 485        | 0   |
| 1985 | 45  | 14  | 1  | 0    | 487        | 0   |
| 1986 | 33  | 46  | 1  | 0    | 483        | 0   |
| 1987 | 38  | 44  | 7  | 0    | 488        | 0   |
| 1988 | 48  | 62  | 3  | 1    | 534        | 0   |
| 1989 | 54  | 20  | 34 | 1    | 603        | 0   |
| 1990 | 170 | 53  | 2  | 1    | 611        | 4   |
| 1991 | 114 | 48  | 8  | 6    | 613        | 4   |
| 1992 | 144 | 158 | 15 | 2    | 611        | 4   |
| 1993 | 191 | 38  | 9  | 4    | 609        | 6   |
| 1994 | 134 | 49  | 5  | 33   | 613        | 7   |
| 1995 | 106 | 55  | 17 | 6    | 620        | 7   |
| 1996 | 111 | 52  | 50 | 4    | 653        | 8   |
| 1997 | 82  | 80  | 48 | 48   | 663        | 9   |
| 1998 | 121 | 112 | 75 | 3    | 666        | 9   |
| 1999 | 335 | 72  | 69 | 11   | 666        | 10  |
| 2000 | 291 | 94  | 50 | 14   | 668        | 11  |

**Appendix Table 4. Number of all-cause mortality data sources by type and year, 1950-2021**

| Year | SBH | CBH | HH | SIBS | VR/SRS/DSP | DSS |
|------|-----|-----|----|------|------------|-----|
| 2001 | 180 | 44  | 39 | 2    | 696        | 11  |
| 2002 | 75  | 171 | 37 | 35   | 700        | 11  |
| 2003 | 275 | 71  | 7  | 6    | 667        | 14  |
| 2004 | 116 | 53  | 39 | 10   | 712        | 16  |
| 2005 | 234 | 110 | 70 | 7    | 716        | 18  |
| 2006 | 306 | 85  | 25 | 5    | 798        | 21  |
| 2007 | 221 | 70  | 10 | 38   | 834        | 21  |
| 2008 | 284 | 157 | 15 | 4    | 801        | 23  |
| 2009 | 261 | 48  | 9  | 10   | 801        | 26  |
| 2010 | 348 | 31  | 54 | 6    | 797        | 30  |
| 2011 | 390 | 137 | 55 | 7    | 767        | 30  |
| 2012 | 193 | 69  | 37 | 39   | 800        | 29  |
| 2013 | 147 | 87  | 34 | 42   | 795        | 24  |
| 2014 | 117 | 90  | 35 | 13   | 796        | 21  |
| 2015 | 221 | 72  | 32 | 3    | 797        | 2   |
| 2016 | 134 | 83  | 34 | 13   | 767        | 0   |
| 2017 | 110 | 88  | 39 | 2    | 724        | 0   |
| 2018 | 3   | 0   | 47 | 0    | 714        | 0   |
| 2019 | 0   | 0   | 31 | 0    | 670        | 0   |
| 2020 | 0   | 0   | 24 | 0    | 741        | 0   |
| 2021 | 0   | 0   | 1  | 0    | 405        | 0   |

**Appendix Table 5. Number of 5q0 data sources by type and location, 1950-2021**

| Location               | SBH | CBH | HH | VR/SRS/DSP | DSS |
|------------------------|-----|-----|----|------------|-----|
| Armenia                | 6   | 4   | 0  | 42         | 0   |
| Azerbaijan             | 4   | 1   | 2  | 43         | 0   |
| Georgia                | 3   | 3   | 1  | 43         | 0   |
| Kazakhstan             | 8   | 2   | 0  | 43         | 0   |
| Kyrgyzstan             | 7   | 4   | 1  | 42         | 0   |
| Mongolia               | 10  | 3   | 2  | 40         | 0   |
| Tajikistan             | 8   | 2   | 1  | 39         | 0   |
| Turkmenistan           | 3   | 1   | 2  | 25         | 0   |
| Uzbekistan             | 4   | 2   | 0  | 41         | 0   |
| Albania                | 7   | 2   | 0  | 42         | 0   |
| Bosnia and Herzegovina | 0   | 0   | 0  | 65         | 0   |
| Bulgaria               | 4   | 0   | 0  | 72         | 0   |
| Croatia                | 0   | 0   | 0  | 71         | 0   |
| Czechia                | 0   | 0   | 0  | 72         | 0   |
| Hungary                | 1   | 0   | 0  | 72         | 0   |
| Montenegro             | 2   | 0   | 0  | 60         | 0   |
| North Macedonia        | 2   | 0   | 0  | 71         | 0   |
| Poland                 | 1   | 0   | 0  | 72         | 0   |
| Romania                | 4   | 1   | 1  | 66         | 0   |
| Serbia                 | 5   | 0   | 1  | 55         | 0   |
| Slovakia               | 0   | 0   | 0  | 72         | 0   |
| Slovenia               | 0   | 0   | 0  | 72         | 0   |
| Belarus                | 4   | 0   | 0  | 61         | 0   |
| Estonia                | 1   | 0   | 0  | 63         | 0   |
| Latvia                 | 1   | 0   | 0  | 62         | 0   |
| Lithuania              | 0   | 0   | 0  | 63         | 0   |
| Moldova                | 4   | 2   | 0  | 43         | 0   |
| Russia                 | 1   | 0   | 0  | 63         | 0   |
| Ukraine                | 8   | 2   | 0  | 58         | 0   |
| Australia              | 0   | 0   | 0  | 71         | 0   |
| New Zealand            | 0   | 0   | 0  | 72         | 0   |
| Brunei                 | 1   | 0   | 0  | 62         | 0   |
| Japan                  | 0   | 0   | 0  | 72         | 0   |
| Aichi                  | 0   | 0   | 0  | 43         | 0   |
| Akita                  | 0   | 0   | 0  | 43         | 0   |
| Aomori                 | 0   | 0   | 0  | 43         | 0   |
| Chiba                  | 0   | 0   | 0  | 43         | 0   |
| Ehime                  | 0   | 0   | 0  | 43         | 0   |
| Fukui                  | 0   | 0   | 0  | 43         | 0   |
| Fukuoka                | 0   | 0   | 0  | 43         | 0   |
| Fukushima              | 0   | 0   | 0  | 43         | 0   |
| Gifu                   | 0   | 0   | 0  | 43         | 0   |
| Gunma                  | 0   | 0   | 0  | 43         | 0   |
| Hiroshima              | 0   | 0   | 0  | 43         | 0   |
| Hokkaidō               | 0   | 0   | 0  | 43         | 0   |
| Hyōgo                  | 0   | 0   | 0  | 42         | 0   |
| Ibaraki                | 0   | 0   | 0  | 43         | 0   |
| Ishikawa               | 0   | 0   | 0  | 43         | 0   |
| Iwate                  | 0   | 0   | 0  | 42         | 0   |
| Kagawa                 | 0   | 0   | 0  | 43         | 0   |
| Kagoshima              | 0   | 0   | 0  | 43         | 0   |
| Kanagawa               | 0   | 0   | 0  | 43         | 0   |
| Kōchi                  | 0   | 0   | 0  | 43         | 0   |
| Kumamoto               | 0   | 0   | 0  | 43         | 0   |
| Kyōto                  | 0   | 0   | 0  | 43         | 0   |
| Mie                    | 0   | 0   | 0  | 43         | 0   |
| Miyagi                 | 0   | 0   | 0  | 42         | 0   |

**Appendix Table 5. Number of 5q0 data sources by type and location, 1950-2021**

| Location       | SBH | CBH | HH | VR/SRS/DSP | DSS |
|----------------|-----|-----|----|------------|-----|
| Miyazaki       | 0   | 0   | 0  | 43         | 0   |
| Nagano         | 0   | 0   | 0  | 43         | 0   |
| Nagasaki       | 0   | 0   | 0  | 43         | 0   |
| Nara           | 0   | 0   | 0  | 43         | 0   |
| Niigata        | 0   | 0   | 0  | 43         | 0   |
| Ōita           | 0   | 0   | 0  | 43         | 0   |
| Okayama        | 0   | 0   | 0  | 43         | 0   |
| Okinawa        | 0   | 0   | 0  | 43         | 0   |
| Ōsaka          | 0   | 0   | 0  | 43         | 0   |
| Saga           | 0   | 0   | 0  | 43         | 0   |
| Saitama        | 0   | 0   | 0  | 43         | 0   |
| Shiga          | 0   | 0   | 0  | 43         | 0   |
| Shimane        | 0   | 0   | 0  | 43         | 0   |
| Shizuoka       | 0   | 0   | 0  | 43         | 0   |
| Tochigi        | 0   | 0   | 0  | 43         | 0   |
| Tokushima      | 0   | 0   | 0  | 43         | 0   |
| Tōkyō          | 0   | 0   | 0  | 43         | 0   |
| Tottori        | 0   | 0   | 0  | 43         | 0   |
| Toyama         | 0   | 0   | 0  | 43         | 0   |
| Wakayama       | 0   | 0   | 0  | 43         | 0   |
| Yamagata       | 0   | 0   | 0  | 43         | 0   |
| Yamaguchi      | 0   | 0   | 0  | 43         | 0   |
| Yamanashi      | 0   | 0   | 0  | 43         | 0   |
| South Korea    | 6   | 1   | 0  | 44         | 0   |
| Singapore      | 0   | 0   | 0  | 72         | 0   |
| Canada         | 0   | 0   | 0  | 69         | 0   |
| Greenland      | 0   | 0   | 0  | 60         | 0   |
| USA            | 0   | 0   | 0  | 71         | 0   |
| Alabama        | 0   | 0   | 0  | 62         | 0   |
| Alaska         | 0   | 0   | 0  | 62         | 0   |
| Arizona        | 0   | 0   | 0  | 62         | 0   |
| Arkansas       | 0   | 0   | 0  | 62         | 0   |
| California     | 0   | 0   | 0  | 62         | 0   |
| Colorado       | 0   | 0   | 0  | 62         | 0   |
| Connecticut    | 0   | 0   | 0  | 62         | 0   |
| Delaware       | 0   | 0   | 0  | 62         | 0   |
| Washington, DC | 0   | 0   | 0  | 62         | 0   |
| Florida        | 0   | 0   | 0  | 62         | 0   |
| Georgia        | 0   | 0   | 0  | 62         | 0   |
| Hawaii         | 0   | 0   | 0  | 62         | 0   |
| Idaho          | 0   | 0   | 0  | 62         | 0   |
| Illinois       | 0   | 0   | 0  | 62         | 0   |
| Indiana        | 0   | 0   | 0  | 62         | 0   |
| Iowa           | 0   | 0   | 0  | 62         | 0   |
| Kansas         | 0   | 0   | 0  | 62         | 0   |
| Kentucky       | 0   | 0   | 0  | 62         | 0   |
| Louisiana      | 0   | 0   | 0  | 62         | 0   |
| Maine          | 0   | 0   | 0  | 62         | 0   |
| Maryland       | 0   | 0   | 0  | 62         | 0   |
| Massachusetts  | 0   | 0   | 0  | 62         | 0   |
| Michigan       | 0   | 0   | 0  | 62         | 0   |
| Minnesota      | 0   | 0   | 0  | 62         | 0   |
| Mississippi    | 0   | 0   | 0  | 62         | 0   |
| Missouri       | 0   | 0   | 0  | 62         | 0   |
| Montana        | 0   | 0   | 0  | 62         | 0   |
| Nebraska       | 0   | 0   | 0  | 62         | 0   |
| Nevada         | 0   | 0   | 0  | 62         | 0   |



**Appendix Table 5. Number of 5q0 data sources by type and location, 1950-2021**

| Location                      | SBH | CBH | HH | VR/SRS/DSP | DSS |
|-------------------------------|-----|-----|----|------------|-----|
| New Hampshire                 | 0   | 0   | 0  | 62         | 0   |
| New Jersey                    | 0   | 0   | 0  | 62         | 0   |
| New Mexico                    | 0   | 0   | 0  | 62         | 0   |
| New York                      | 0   | 0   | 0  | 62         | 0   |
| North Carolina                | 0   | 0   | 0  | 62         | 0   |
| North Dakota                  | 0   | 0   | 0  | 62         | 0   |
| Ohio                          | 0   | 0   | 0  | 62         | 0   |
| Oklahoma                      | 0   | 0   | 0  | 62         | 0   |
| Oregon                        | 0   | 0   | 0  | 62         | 0   |
| Pennsylvania                  | 0   | 0   | 0  | 62         | 0   |
| Rhode Island                  | 0   | 0   | 0  | 62         | 0   |
| South Carolina                | 0   | 0   | 0  | 62         | 0   |
| South Dakota                  | 0   | 0   | 0  | 62         | 0   |
| Tennessee                     | 0   | 0   | 0  | 62         | 0   |
| Texas                         | 0   | 0   | 0  | 62         | 0   |
| Utah                          | 0   | 0   | 0  | 62         | 0   |
| Vermont                       | 0   | 0   | 0  | 62         | 0   |
| Virginia                      | 0   | 0   | 0  | 62         | 0   |
| Washington                    | 0   | 0   | 0  | 62         | 0   |
| West Virginia                 | 0   | 0   | 0  | 62         | 0   |
| Wisconsin                     | 0   | 0   | 0  | 62         | 0   |
| Wyoming                       | 0   | 0   | 0  | 62         | 0   |
| Argentina                     | 3   | 0   | 0  | 64         | 0   |
| Chile                         | 4   | 0   | 0  | 72         | 0   |
| Uruguay                       | 6   | 0   | 0  | 68         | 0   |
| Andorra                       | 0   | 0   | 0  | 21         | 0   |
| Austria                       | 0   | 0   | 0  | 72         | 0   |
| Belgium                       | 2   | 0   | 0  | 71         | 0   |
| Cyprus                        | 3   | 0   | 1  | 48         | 0   |
| Denmark                       | 0   | 0   | 0  | 72         | 0   |
| Finland                       | 0   | 0   | 0  | 72         | 0   |
| France                        | 0   | 0   | 0  | 71         | 0   |
| Germany                       | 0   | 0   | 0  | 66         | 0   |
| Greece                        | 0   | 0   | 0  | 71         | 0   |
| Iceland                       | 0   | 0   | 0  | 72         | 0   |
| Ireland                       | 0   | 0   | 0  | 70         | 0   |
| Israel                        | 0   | 0   | 0  | 71         | 0   |
| Italy                         | 0   | 0   | 0  | 72         | 0   |
| Abruzzo                       | 0   | 0   | 0  | 53         | 0   |
| Basilicata                    | 0   | 0   | 0  | 53         | 0   |
| Calabria                      | 0   | 0   | 0  | 53         | 0   |
| Campania                      | 0   | 0   | 0  | 53         | 0   |
| Emilia-Romagna                | 0   | 0   | 0  | 53         | 0   |
| Friuli-Venezia Giulia         | 0   | 0   | 0  | 53         | 0   |
| Lazio                         | 0   | 0   | 0  | 53         | 0   |
| Liguria                       | 0   | 0   | 0  | 53         | 0   |
| Lombardia                     | 0   | 0   | 0  | 53         | 0   |
| Marche                        | 0   | 0   | 0  | 53         | 0   |
| Molise                        | 0   | 0   | 0  | 53         | 0   |
| Piemonte                      | 0   | 0   | 0  | 53         | 0   |
| Provincia autonoma di Bolzano | 0   | 0   | 0  | 52         | 0   |
| Provincia autonoma di Trento  | 0   | 0   | 0  | 52         | 0   |
| Puglia                        | 0   | 0   | 0  | 53         | 0   |
| Sardegna                      | 0   | 0   | 0  | 53         | 0   |
| Sicilia                       | 0   | 0   | 0  | 53         | 0   |
| Toscana                       | 0   | 0   | 0  | 53         | 0   |
| Umbria                        | 0   | 0   | 0  | 53         | 0   |

**Appendix Table 5. Number of 5q0 data sources by type and location, 1950-2021**

| Location                | SBH | CBH | HH | VR/SRS/DSP | DSS |
|-------------------------|-----|-----|----|------------|-----|
| Valle d'Aosta           | 0   | 0   | 0  | 53         | 0   |
| Veneto                  | 0   | 0   | 0  | 53         | 0   |
| Luxembourg              | 0   | 0   | 0  | 72         | 0   |
| Malta                   | 0   | 0   | 0  | 72         | 0   |
| Monaco                  | 0   | 0   | 0  | 9          | 0   |
| Netherlands             | 0   | 0   | 0  | 70         | 0   |
| Norway                  | 0   | 0   | 0  | 72         | 0   |
| Agder                   | 0   | 0   | 0  | 70         | 0   |
| Innlandet               | 0   | 0   | 0  | 70         | 0   |
| Møre og Romsdal         | 0   | 0   | 0  | 70         | 0   |
| Nordland                | 0   | 0   | 0  | 70         | 0   |
| Oslo                    | 0   | 0   | 0  | 70         | 0   |
| Rogaland                | 0   | 0   | 0  | 70         | 0   |
| Troms og Finnmark       | 0   | 0   | 0  | 70         | 0   |
| Trøndelag               | 0   | 0   | 0  | 70         | 0   |
| Vestfold og Telemark    | 0   | 0   | 0  | 70         | 0   |
| Vestland                | 0   | 0   | 0  | 70         | 0   |
| Viken                   | 0   | 0   | 0  | 70         | 0   |
| Portugal                | 1   | 1   | 0  | 69         | 0   |
| San Marino              | 0   | 0   | 0  | 49         | 0   |
| Spain                   | 0   | 0   | 0  | 72         | 0   |
| Sweden                  | 0   | 0   | 0  | 72         | 0   |
| Stockholm               | 0   | 0   | 0  | 37         | 0   |
| Sweden except Stockholm | 0   | 0   | 0  | 37         | 0   |
| Switzerland             | 1   | 0   | 0  | 72         | 0   |
| UK                      | 0   | 0   | 0  | 70         | 0   |
| England                 | 0   | 0   | 0  | 41         | 0   |
| East Midlands           | 0   | 0   | 0  | 38         | 0   |
| Derby                   | 0   | 0   | 0  | 41         | 0   |
| Derbyshire              | 0   | 0   | 0  | 41         | 0   |
| Leicester               | 0   | 0   | 0  | 41         | 0   |
| Leicestershire          | 0   | 0   | 0  | 41         | 0   |
| Lincolnshire            | 0   | 0   | 0  | 41         | 0   |
| Northamptonshire        | 0   | 0   | 0  | 40         | 0   |
| Nottingham              | 0   | 0   | 0  | 41         | 0   |
| Nottinghamshire         | 0   | 0   | 0  | 41         | 0   |
| Rutland                 | 0   | 0   | 0  | 41         | 0   |
| East of England         | 0   | 0   | 0  | 38         | 0   |
| Bedford                 | 0   | 0   | 0  | 41         | 0   |
| Cambridgeshire          | 0   | 0   | 0  | 41         | 0   |
| Central Bedfordshire    | 0   | 0   | 0  | 41         | 0   |
| Essex                   | 0   | 0   | 0  | 41         | 0   |
| Hertfordshire           | 0   | 0   | 0  | 41         | 0   |
| Luton                   | 0   | 0   | 0  | 41         | 0   |
| Norfolk                 | 0   | 0   | 0  | 41         | 0   |
| Peterborough            | 0   | 0   | 0  | 41         | 0   |
| Southend-on-Sea         | 0   | 0   | 0  | 41         | 0   |
| Suffolk                 | 0   | 0   | 0  | 41         | 0   |
| Thurrock                | 0   | 0   | 0  | 41         | 0   |
| Greater London          | 0   | 0   | 0  | 38         | 0   |
| Barking and Dagenham    | 0   | 0   | 0  | 41         | 0   |
| Barnet                  | 0   | 0   | 0  | 41         | 0   |
| Bexley                  | 0   | 0   | 0  | 41         | 0   |
| Brent                   | 0   | 0   | 0  | 41         | 0   |
| Bromley                 | 0   | 0   | 0  | 41         | 0   |
| Camden                  | 0   | 0   | 0  | 41         | 0   |
| Croydon                 | 0   | 0   | 0  | 41         | 0   |

**Appendix Table 5. Number of 5q0 data sources by type and location, 1950-2021**

| Location                  | SBH | CBH | HH | VR/SRS/DSP | DSS |
|---------------------------|-----|-----|----|------------|-----|
| Ealing                    | 0   | 0   | 0  | 41         | 0   |
| Enfield                   | 0   | 0   | 0  | 41         | 0   |
| Greenwich                 | 0   | 0   | 0  | 41         | 0   |
| Hackney                   | 0   | 0   | 0  | 38         | 0   |
| Hammersmith and Fulham    | 0   | 0   | 0  | 41         | 0   |
| Haringey                  | 0   | 0   | 0  | 41         | 0   |
| Harrow                    | 0   | 0   | 0  | 41         | 0   |
| Havering                  | 0   | 0   | 0  | 41         | 0   |
| Hillingdon                | 0   | 0   | 0  | 41         | 0   |
| Hounslow                  | 0   | 0   | 0  | 41         | 0   |
| Islington                 | 0   | 0   | 0  | 41         | 0   |
| Kensington and Chelsea    | 0   | 0   | 0  | 41         | 0   |
| Kingston upon Thames      | 0   | 0   | 0  | 41         | 0   |
| Lambeth                   | 0   | 0   | 0  | 41         | 0   |
| Lewisham                  | 0   | 0   | 0  | 41         | 0   |
| Merton                    | 0   | 0   | 0  | 41         | 0   |
| Newham                    | 0   | 0   | 0  | 41         | 0   |
| Redbridge                 | 0   | 0   | 0  | 41         | 0   |
| Richmond upon Thames      | 0   | 0   | 0  | 41         | 0   |
| Southwark                 | 0   | 0   | 0  | 41         | 0   |
| Sutton                    | 0   | 0   | 0  | 41         | 0   |
| Tower Hamlets             | 0   | 0   | 0  | 41         | 0   |
| Waltham Forest            | 0   | 0   | 0  | 41         | 0   |
| Wandsworth                | 0   | 0   | 0  | 41         | 0   |
| Westminster               | 0   | 0   | 0  | 41         | 0   |
| North East England        | 0   | 0   | 0  | 38         | 0   |
| County Durham             | 0   | 0   | 0  | 41         | 0   |
| Darlington                | 0   | 0   | 0  | 41         | 0   |
| Gateshead                 | 0   | 0   | 0  | 41         | 0   |
| Hartlepool                | 0   | 0   | 0  | 41         | 0   |
| Middlesbrough             | 0   | 0   | 0  | 41         | 0   |
| Newcastle upon Tyne       | 0   | 0   | 0  | 41         | 0   |
| North Tyneside            | 0   | 0   | 0  | 41         | 0   |
| Northumberland            | 0   | 0   | 0  | 41         | 0   |
| Redcar and Cleveland      | 0   | 0   | 0  | 41         | 0   |
| South Tyneside            | 0   | 0   | 0  | 41         | 0   |
| Stockton-on-Tees          | 0   | 0   | 0  | 41         | 0   |
| Sunderland                | 0   | 0   | 0  | 41         | 0   |
| North West England        | 0   | 0   | 0  | 38         | 0   |
| Blackburn with Darwen     | 0   | 0   | 0  | 41         | 0   |
| Blackpool                 | 0   | 0   | 0  | 41         | 0   |
| Bolton                    | 0   | 0   | 0  | 41         | 0   |
| Bury                      | 0   | 0   | 0  | 41         | 0   |
| Cheshire East             | 0   | 0   | 0  | 41         | 0   |
| Cheshire West and Chester | 0   | 0   | 0  | 41         | 0   |
| Cumbria                   | 0   | 0   | 0  | 41         | 0   |
| Halton                    | 0   | 0   | 0  | 41         | 0   |
| Knowsley                  | 0   | 0   | 0  | 41         | 0   |
| Lancashire                | 0   | 0   | 0  | 41         | 0   |
| Liverpool                 | 0   | 0   | 0  | 41         | 0   |
| Manchester                | 0   | 0   | 0  | 41         | 0   |
| Oldham                    | 0   | 0   | 0  | 41         | 0   |
| Rochdale                  | 0   | 0   | 0  | 41         | 0   |
| Salford                   | 0   | 0   | 0  | 41         | 0   |
| Sefton                    | 0   | 0   | 0  | 41         | 0   |
| St Helens                 | 0   | 0   | 0  | 41         | 0   |
| Stockport                 | 0   | 0   | 0  | 41         | 0   |

**Appendix Table 5. Number of 5q0 data sources by type and location, 1950-2021**

| Location                     | SBH | CBH | HH | VR/SRS/DSP | DSS |
|------------------------------|-----|-----|----|------------|-----|
| Tameside                     | 0   | 0   | 0  | 41         | 0   |
| Trafford                     | 0   | 0   | 0  | 41         | 0   |
| Warrington                   | 0   | 0   | 0  | 41         | 0   |
| Wigan                        | 0   | 0   | 0  | 41         | 0   |
| Wirral                       | 0   | 0   | 0  | 41         | 0   |
| South East England           | 0   | 0   | 0  | 38         | 0   |
| Bracknell Forest             | 0   | 0   | 0  | 41         | 0   |
| Brighton and Hove            | 0   | 0   | 0  | 41         | 0   |
| Buckinghamshire              | 0   | 0   | 0  | 41         | 0   |
| East Sussex                  | 0   | 0   | 0  | 41         | 0   |
| Hampshire                    | 0   | 0   | 0  | 41         | 0   |
| Isle of Wight                | 0   | 0   | 0  | 41         | 0   |
| Kent                         | 0   | 0   | 0  | 41         | 0   |
| Medway                       | 0   | 0   | 0  | 41         | 0   |
| Milton Keynes                | 0   | 0   | 0  | 41         | 0   |
| Oxfordshire                  | 0   | 0   | 0  | 41         | 0   |
| Portsmouth                   | 0   | 0   | 0  | 41         | 0   |
| Reading                      | 0   | 0   | 0  | 41         | 0   |
| Slough                       | 0   | 0   | 0  | 41         | 0   |
| Southampton                  | 0   | 0   | 0  | 41         | 0   |
| Surrey                       | 0   | 0   | 0  | 41         | 0   |
| West Berkshire               | 0   | 0   | 0  | 41         | 0   |
| West Sussex                  | 0   | 0   | 0  | 41         | 0   |
| Windsor and Maidenhead       | 0   | 0   | 0  | 41         | 0   |
| Wokingham                    | 0   | 0   | 0  | 41         | 0   |
| South West England           | 0   | 0   | 0  | 38         | 0   |
| Bath and North East Somerset | 0   | 0   | 0  | 41         | 0   |
| Bournemouth                  | 0   | 0   | 0  | 40         | 0   |
| Bristol, City of             | 0   | 0   | 0  | 41         | 0   |
| Cornwall                     | 0   | 0   | 0  | 41         | 0   |
| Devon                        | 0   | 0   | 0  | 41         | 0   |
| Dorset                       | 0   | 0   | 0  | 41         | 0   |
| Gloucestershire              | 0   | 0   | 0  | 41         | 0   |
| North Somerset               | 0   | 0   | 0  | 41         | 0   |
| Plymouth                     | 0   | 0   | 0  | 41         | 0   |
| Poole                        | 0   | 0   | 0  | 40         | 0   |
| Somerset                     | 0   | 0   | 0  | 41         | 0   |
| South Gloucestershire        | 0   | 0   | 0  | 41         | 0   |
| Swindon                      | 0   | 0   | 0  | 41         | 0   |
| Torbay                       | 0   | 0   | 0  | 41         | 0   |
| Wiltshire                    | 0   | 0   | 0  | 41         | 0   |
| West Midlands                | 0   | 0   | 0  | 38         | 0   |
| Birmingham                   | 0   | 0   | 0  | 41         | 0   |
| Coventry                     | 0   | 0   | 0  | 41         | 0   |
| Dudley                       | 0   | 0   | 0  | 41         | 0   |
| Herefordshire, County of     | 0   | 0   | 0  | 41         | 0   |
| Sandwell                     | 0   | 0   | 0  | 41         | 0   |
| Shropshire                   | 0   | 0   | 0  | 41         | 0   |
| Solihull                     | 0   | 0   | 0  | 41         | 0   |
| Staffordshire                | 0   | 0   | 0  | 41         | 0   |
| Stoke-on-Trent               | 0   | 0   | 0  | 41         | 0   |
| Telford and Wrekin           | 0   | 0   | 0  | 41         | 0   |
| Walsall                      | 0   | 0   | 0  | 41         | 0   |
| Warwickshire                 | 0   | 0   | 0  | 41         | 0   |
| Wolverhampton                | 0   | 0   | 0  | 41         | 0   |
| Worcestershire               | 0   | 0   | 0  | 41         | 0   |
| Yorkshire and the Humber     | 0   | 0   | 0  | 38         | 0   |

**Appendix Table 5. Number of 5q0 data sources by type and location, 1950-2021**

| Location                         | SBH | CBH | HH | VR/SRS/DSP | DSS |
|----------------------------------|-----|-----|----|------------|-----|
| Barnsley                         | 0   | 0   | 0  | 41         | 0   |
| Bradford                         | 0   | 0   | 0  | 41         | 0   |
| Calderdale                       | 0   | 0   | 0  | 41         | 0   |
| Doncaster                        | 0   | 0   | 0  | 41         | 0   |
| East Riding of Yorkshire         | 0   | 0   | 0  | 41         | 0   |
| Kingston upon Hull, City of      | 0   | 0   | 0  | 41         | 0   |
| Kirklees                         | 0   | 0   | 0  | 41         | 0   |
| Leeds                            | 0   | 0   | 0  | 41         | 0   |
| North East Lincolnshire          | 0   | 0   | 0  | 41         | 0   |
| North Lincolnshire               | 0   | 0   | 0  | 41         | 0   |
| North Yorkshire                  | 0   | 0   | 0  | 41         | 0   |
| Rotherham                        | 0   | 0   | 0  | 41         | 0   |
| Sheffield                        | 0   | 0   | 0  | 41         | 0   |
| Wakefield                        | 0   | 0   | 0  | 41         | 0   |
| York                             | 0   | 0   | 0  | 41         | 0   |
| Northern Ireland                 | 0   | 0   | 0  | 70         | 0   |
| Scotland                         | 0   | 0   | 0  | 72         | 0   |
| Wales                            | 0   | 0   | 0  | 41         | 0   |
| Bolivia                          | 26  | 6   | 1  | 12         | 0   |
| Ecuador                          | 17  | 7   | 0  | 67         | 0   |
| Peru                             | 21  | 14  | 0  | 68         | 0   |
| Antigua and Barbuda              | 0   | 0   | 0  | 61         | 0   |
| The Bahamas                      | 0   | 0   | 0  | 50         | 0   |
| Barbados                         | 0   | 0   | 0  | 62         | 0   |
| Belize                           | 7   | 3   | 0  | 69         | 0   |
| Bermuda                          | 1   | 0   | 0  | 68         | 0   |
| Cuba                             | 1   | 0   | 0  | 62         | 0   |
| Dominica                         | 0   | 0   | 0  | 64         | 0   |
| Dominican Republic               | 15  | 13  | 1  | 62         | 0   |
| Grenada                          | 0   | 0   | 0  | 57         | 0   |
| Guyana                           | 7   | 4   | 1  | 46         | 0   |
| Haiti                            | 9   | 7   | 2  | 1          | 0   |
| Jamaica                          | 5   | 1   | 1  | 51         | 0   |
| Puerto Rico                      | 1   | 1   | 0  | 71         | 0   |
| Saint Kitts and Nevis            | 0   | 0   | 0  | 66         | 0   |
| Saint Lucia                      | 0   | 0   | 0  | 57         | 0   |
| Saint Vincent and the Grenadines | 0   | 0   | 0  | 53         | 0   |
| Suriname                         | 2   | 0   | 1  | 61         | 0   |
| Trinidad and Tobago              | 5   | 2   | 0  | 67         | 0   |
| Virgin Islands                   | 0   | 0   | 0  | 54         | 0   |
| Colombia                         | 13  | 8   | 0  | 69         | 0   |
| Costa Rica                       | 7   | 3   | 0  | 71         | 0   |
| El Salvador                      | 10  | 6   | 0  | 70         | 0   |
| Guatemala                        | 10  | 6   | 0  | 69         | 0   |
| Honduras                         | 12  | 5   | 2  | 44         | 0   |
| Mexico                           | 25  | 2   | 1  | 72         | 0   |
| Aguascalientes                   | 16  | 1   | 0  | 43         | 0   |
| Baja California                  | 16  | 1   | 0  | 43         | 0   |
| Baja California Sur              | 16  | 1   | 0  | 43         | 0   |
| Campeche                         | 16  | 1   | 0  | 43         | 0   |
| Chiapas                          | 16  | 1   | 0  | 43         | 0   |
| Chihuahua                        | 16  | 1   | 0  | 43         | 0   |
| Coahuila                         | 16  | 1   | 0  | 43         | 0   |
| Colima                           | 16  | 1   | 0  | 43         | 0   |
| Durango                          | 16  | 1   | 0  | 43         | 0   |
| Guanajuato                       | 16  | 1   | 0  | 43         | 0   |
| Guerrero                         | 16  | 1   | 0  | 43         | 0   |

**Appendix Table 5. Number of 5q0 data sources by type and location, 1950-2021**

| Location                        | SBH | CBH | HH | VR/SRS/DSP | DSS |
|---------------------------------|-----|-----|----|------------|-----|
| Hidalgo                         | 14  | 1   | 0  | 43         | 0   |
| Jalisco                         | 16  | 1   | 0  | 43         | 0   |
| México                          | 16  | 1   | 0  | 43         | 0   |
| Mexico City                     | 16  | 1   | 0  | 42         | 0   |
| Michoacán de Ocampo             | 16  | 1   | 0  | 43         | 0   |
| Morelos                         | 16  | 1   | 0  | 43         | 0   |
| Nayarit                         | 16  | 1   | 0  | 43         | 0   |
| Nuevo León                      | 16  | 1   | 0  | 43         | 0   |
| Oaxaca                          | 16  | 1   | 0  | 43         | 0   |
| Puebla                          | 16  | 1   | 0  | 43         | 0   |
| Querétaro                       | 16  | 1   | 0  | 43         | 0   |
| Quintana Roo                    | 16  | 1   | 0  | 43         | 0   |
| San Luis Potosí                 | 16  | 1   | 0  | 43         | 0   |
| Sinaloa                         | 16  | 1   | 0  | 43         | 0   |
| Sonora                          | 16  | 1   | 0  | 43         | 0   |
| Tabasco                         | 16  | 1   | 0  | 43         | 0   |
| Tamaulipas                      | 16  | 1   | 0  | 43         | 0   |
| Tlaxcala                        | 16  | 1   | 0  | 43         | 0   |
| Veracruz de Ignacio de la Llave | 16  | 1   | 0  | 43         | 0   |
| Yucatán                         | 16  | 1   | 0  | 43         | 0   |
| Zacatecas                       | 16  | 1   | 0  | 43         | 0   |
| Nicaragua                       | 12  | 5   | 0  | 37         | 0   |
| Panama                          | 9   | 1   | 0  | 70         | 0   |
| Venezuela                       | 4   | 1   | 1  | 66         | 0   |
| Brazil                          | 29  | 2   | 1  | 39         | 0   |
| Acre                            | 9   | 1   | 1  | 34         | 0   |
| Alagoas                         | 21  | 2   | 1  | 34         | 0   |
| Amapá                           | 9   | 1   | 1  | 34         | 0   |
| Amazonas                        | 10  | 1   | 1  | 34         | 0   |
| Bahia                           | 21  | 2   | 1  | 34         | 0   |
| Ceará                           | 21  | 2   | 1  | 34         | 0   |
| Distrito Federal                | 21  | 1   | 1  | 34         | 0   |
| Espírito Santo                  | 21  | 1   | 1  | 34         | 0   |
| Goiás                           | 21  | 1   | 1  | 34         | 0   |
| Maranhão                        | 21  | 2   | 1  | 34         | 0   |
| Mato Grosso                     | 21  | 1   | 1  | 34         | 0   |
| Mato Grosso do Sul              | 21  | 1   | 1  | 34         | 0   |
| Minas Gerais                    | 21  | 1   | 1  | 34         | 0   |
| Pará                            | 10  | 1   | 1  | 34         | 0   |
| Paraíba                         | 21  | 2   | 1  | 33         | 0   |
| Paraná                          | 21  | 1   | 1  | 34         | 0   |
| Pernambuco                      | 21  | 2   | 1  | 34         | 0   |
| Piauí                           | 21  | 2   | 1  | 34         | 0   |
| Rio de Janeiro                  | 21  | 1   | 1  | 34         | 0   |
| Rio Grande do Norte             | 21  | 2   | 1  | 34         | 0   |
| Rio Grande do Sul               | 21  | 1   | 1  | 34         | 0   |
| Rondônia                        | 9   | 1   | 1  | 34         | 0   |
| Roraima                         | 9   | 1   | 1  | 34         | 0   |
| Santa Catarina                  | 21  | 1   | 1  | 34         | 0   |
| São Paulo                       | 20  | 1   | 1  | 34         | 0   |
| Sergipe                         | 21  | 2   | 1  | 34         | 0   |
| Tocantins                       | 9   | 1   | 1  | 24         | 0   |
| Paraguay                        | 16  | 7   | 0  | 68         | 0   |
| Afghanistan                     | 7   | 1   | 0  | 0          | 0   |
| Algeria                         | 5   | 3   | 1  | 16         | 0   |
| Bahrain                         | 4   | 0   | 2  | 38         | 0   |
| Egypt                           | 14  | 11  | 2  | 68         | 0   |

**Appendix Table 5. Number of 5q0 data sources by type and location, 1950-2021**

| Location                    | SBH | CBH | HH | VR/SRS/DSP | DSS |
|-----------------------------|-----|-----|----|------------|-----|
| Iran                        | 5   | 1   | 3  | 3          | 0   |
| Alborz                      | 3   | 1   | 0  | 2          | 0   |
| Ardebil                     | 3   | 1   | 0  | 2          | 0   |
| Bushehr                     | 3   | 1   | 0  | 2          | 0   |
| Chahar Mahaal and Bakhtiari | 3   | 1   | 0  | 2          | 0   |
| East Azarbayejan            | 3   | 1   | 0  | 2          | 0   |
| Fars                        | 3   | 1   | 0  | 2          | 0   |
| Gilan                       | 3   | 1   | 0  | 2          | 0   |
| Golestan                    | 3   | 1   | 0  | 2          | 0   |
| Hamadan                     | 3   | 1   | 0  | 2          | 0   |
| Hormozgan                   | 3   | 1   | 0  | 2          | 0   |
| Ilam                        | 3   | 1   | 0  | 2          | 0   |
| Isfahan                     | 3   | 1   | 0  | 2          | 0   |
| Kerman                      | 3   | 1   | 0  | 2          | 0   |
| Kermanshah                  | 3   | 1   | 0  | 2          | 0   |
| Khorasan-e-Razavi           | 3   | 1   | 0  | 2          | 0   |
| Khuzestan                   | 3   | 1   | 0  | 2          | 0   |
| Kohgiluyeh and Boyer-Ahmad  | 3   | 1   | 0  | 2          | 0   |
| Kurdistan                   | 3   | 1   | 0  | 2          | 0   |
| Lorestan                    | 3   | 1   | 0  | 2          | 0   |
| Markazi                     | 3   | 1   | 0  | 2          | 0   |
| Mazandaran                  | 3   | 1   | 0  | 2          | 0   |
| North Khorasan              | 3   | 1   | 0  | 2          | 0   |
| Qazvin                      | 3   | 1   | 0  | 2          | 0   |
| Qom                         | 3   | 1   | 0  | 2          | 0   |
| Semnan                      | 3   | 1   | 0  | 2          | 0   |
| Sistan and Baluchistan      | 3   | 1   | 0  | 2          | 0   |
| South Khorasan              | 3   | 1   | 0  | 2          | 0   |
| Tehran                      | 3   | 1   | 0  | 2          | 0   |
| West Azarbayejan            | 3   | 1   | 0  | 2          | 0   |
| Yazd                        | 3   | 1   | 0  | 2          | 0   |
| Zanjan                      | 3   | 1   | 0  | 2          | 0   |
| Iraq                        | 7   | 5   | 3  | 12         | 1   |
| Jordan                      | 12  | 7   | 0  | 26         | 0   |
| Kuwait                      | 3   | 0   | 1  | 58         | 0   |
| Lebanon                     | 4   | 2   | 0  | 8          | 0   |
| Libya                       | 4   | 1   | 0  | 17         | 0   |
| Morocco                     | 9   | 6   | 1  | 11         | 0   |
| Oman                        | 4   | 0   | 2  | 16         | 0   |
| Palestine                   | 9   | 4   | 4  | 12         | 0   |
| Qatar                       | 1   | 0   | 2  | 40         | 0   |
| Saudi Arabia                | 2   | 0   | 4  | 2          | 0   |
| Sudan                       | 9   | 5   | 2  | 0          | 0   |
| Syria                       | 6   | 4   | 0  | 31         | 0   |
| Tunisia                     | 7   | 5   | 1  | 21         | 0   |
| Türkiye                     | 14  | 5   | 3  | 39         | 0   |
| United Arab Emirates        | 2   | 0   | 6  | 16         | 0   |
| Yemen                       | 7   | 5   | 2  | 0          | 0   |
| Bangladesh                  | 14  | 9   | 3  | 42         | 0   |
| Bhutan                      | 5   | 0   | 1  | 0          | 0   |
| India                       | 12  | 4   | 0  | 33         | 0   |
| Nepal                       | 12  | 7   | 4  | 0          | 0   |
| Pakistan                    | 15  | 8   | 9  | 22         | 0   |
| Azad Jammu & Kashmir        | 1   | 0   | 0  | 0          | 0   |
| Balochistan                 | 5   | 5   | 0  | 0          | 0   |
| Gilgit-Baltistan            | 2   | 2   | 0  | 0          | 0   |
| Islamabad Capital Territory | 0   | 1   | 0  | 0          | 0   |

**Appendix Table 5. Number of 5q0 data sources by type and location, 1950-2021**

| Location                       | SBH | CBH | HH | VR/SRS/DSP | DSS |
|--------------------------------|-----|-----|----|------------|-----|
| Khyber Pakhtunkhwa             | 4   | 5   | 1  | 0          | 0   |
| Punjab                         | 7   | 5   | 1  | 0          | 0   |
| Sindh                          | 5   | 5   | 1  | 0          | 0   |
| China                          | 5   | 0   | 31 | 23         | 0   |
| North Korea                    | 0   | 0   | 1  | 0          | 0   |
| Taiwan (province of China)     | 0   | 0   | 0  | 67         | 0   |
| American Samoa                 | 1   | 0   | 0  | 55         | 0   |
| Cook Islands                   | 1   | 0   | 0  | 45         | 0   |
| Fiji                           | 7   | 1   | 0  | 55         | 0   |
| Guam                           | 0   | 0   | 0  | 70         | 0   |
| Kiribati                       | 7   | 0   | 2  | 12         | 0   |
| Marshall Islands               | 2   | 0   | 1  | 14         | 0   |
| Federated States of Micronesia | 3   | 0   | 0  | 1          | 0   |
| Nauru                          | 2   | 0   | 2  | 17         | 0   |
| Niue                           | 0   | 0   | 0  | 32         | 0   |
| Northern Mariana Islands       | 0   | 0   | 0  | 23         | 0   |
| Palau                          | 2   | 0   | 0  | 6          | 0   |
| Papua New Guinea               | 8   | 1   | 3  | 2          | 0   |
| Samoa                          | 5   | 0   | 4  | 22         | 0   |
| Solomon Islands                | 4   | 0   | 2  | 0          | 0   |
| Tokelau                        | 0   | 0   | 1  | 9          | 0   |
| Tonga                          | 3   | 0   | 3  | 16         | 0   |
| Tuvalu                         | 1   | 0   | 3  | 13         | 0   |
| Vanuatu                        | 5   | 0   | 1  | 1          | 0   |
| Cambodia                       | 11  | 5   | 1  | 0          | 0   |
| Indonesia                      | 46  | 15  | 3  | 0          | 0   |
| Aceh                           | 32  | 4   | 0  | 0          | 0   |
| Bali                           | 36  | 5   | 0  | 0          | 0   |
| Bangka-Belitung Islands        | 25  | 4   | 2  | 0          | 0   |
| Banten                         | 33  | 4   | 0  | 0          | 0   |
| Bengkulu                       | 36  | 5   | 0  | 0          | 0   |
| Gorontalo                      | 22  | 4   | 1  | 0          | 0   |
| Jakarta                        | 40  | 5   | 0  | 0          | 0   |
| Jambi                          | 34  | 4   | 0  | 0          | 0   |
| West Java                      | 40  | 5   | 0  | 0          | 0   |
| Central Java                   | 40  | 5   | 0  | 0          | 0   |
| East Java                      | 40  | 5   | 0  | 0          | 0   |
| West Kalimantan                | 36  | 5   | 0  | 0          | 0   |
| South Kalimantan               | 40  | 5   | 0  | 0          | 0   |
| Central Kalimantan             | 36  | 4   | 0  | 0          | 0   |
| East Kalimantan                | 34  | 4   | 0  | 0          | 0   |
| North Kalimantan               | 17  | 2   | 0  | 0          | 0   |
| Riau Islands                   | 29  | 3   | 0  | 0          | 0   |
| Lampung                        | 39  | 5   | 0  | 0          | 0   |
| Maluku                         | 33  | 3   | 0  | 0          | 0   |
| North Maluku                   | 24  | 3   | 0  | 0          | 0   |
| West Nusa Tenggara             | 40  | 5   | 0  | 0          | 0   |
| East Nusa Tenggara             | 34  | 4   | 0  | 0          | 0   |
| Papua                          | 30  | 2   | 1  | 0          | 0   |
| West Papua                     | 29  | 2   | 1  | 0          | 0   |
| Riau                           | 37  | 5   | 0  | 0          | 0   |
| West Sulawesi                  | 30  | 3   | 0  | 0          | 0   |
| South Sulawesi                 | 40  | 5   | 0  | 0          | 0   |
| Central Sulawesi               | 36  | 5   | 0  | 0          | 0   |
| Southeast Sulawesi             | 35  | 5   | 0  | 0          | 0   |
| North Sulawesi                 | 36  | 5   | 0  | 0          | 0   |
| West Sumatra                   | 40  | 5   | 0  | 0          | 0   |



**Appendix Table 5. Number of 5q0 data sources by type and location, 1950-2021**

| Location                  | SBH | CBH | HH | VR/SRS/DSP | DSS |
|---------------------------|-----|-----|----|------------|-----|
| South Sumatra             | 40  | 5   | 0  | 0          | 0   |
| North Sumatra             | 40  | 5   | 0  | 0          | 0   |
| Yogyakarta                | 40  | 5   | 2  | 0          | 0   |
| Laos                      | 4   | 2   | 1  | 0          | 0   |
| Malaysia                  | 3   | 1   | 0  | 57         | 0   |
| Maldives                  | 7   | 2   | 1  | 44         | 0   |
| Mauritius                 | 0   | 0   | 0  | 71         | 0   |
| Myanmar                   | 6   | 1   | 2  | 2          | 0   |
| Philippines               | 14  | 7   | 0  | 69         | 0   |
| Abra                      | 3   | 5   | 0  | 14         | 0   |
| Agusan Del Norte          | 3   | 5   | 0  | 20         | 0   |
| Agusan Del Sur            | 3   | 5   | 0  | 20         | 0   |
| Aklan                     | 3   | 5   | 0  | 26         | 0   |
| Albay                     | 3   | 5   | 0  | 26         | 0   |
| Antique                   | 3   | 5   | 0  | 26         | 0   |
| Apayao                    | 3   | 4   | 0  | 14         | 0   |
| Aurora                    | 3   | 5   | 0  | 14         | 0   |
| Basilan                   | 3   | 5   | 0  | 19         | 0   |
| Bataan                    | 3   | 5   | 0  | 26         | 0   |
| Batanes                   | 3   | 2   | 0  | 26         | 0   |
| Batangas                  | 3   | 5   | 0  | 26         | 0   |
| Benguet                   | 3   | 5   | 0  | 25         | 0   |
| Biliran                   | 3   | 4   | 0  | 14         | 0   |
| Bohol                     | 3   | 5   | 0  | 26         | 0   |
| Bukidnon                  | 3   | 5   | 0  | 26         | 0   |
| Bulacan                   | 3   | 5   | 0  | 26         | 0   |
| Cagayan                   | 3   | 5   | 0  | 26         | 0   |
| Camarines Norte           | 3   | 5   | 0  | 26         | 0   |
| Camarines Sur             | 3   | 5   | 0  | 14         | 0   |
| Camiguin                  | 3   | 3   | 0  | 25         | 0   |
| Capiz                     | 3   | 4   | 0  | 26         | 0   |
| Catanduanes               | 3   | 5   | 0  | 14         | 0   |
| Cavite                    | 3   | 5   | 0  | 26         | 0   |
| Cebu                      | 3   | 5   | 0  | 26         | 0   |
| Cotabato (North Cotabato) | 3   | 5   | 0  | 26         | 0   |
| Davao de Oro              | 2   | 5   | 0  | 14         | 0   |
| Davao Del Norte           | 3   | 5   | 0  | 25         | 0   |
| Davao Del Sur             | 3   | 5   | 0  | 25         | 0   |
| Davao Occidental          | 3   | 1   | 0  | 14         | 0   |
| Davao Oriental            | 3   | 5   | 0  | 25         | 0   |
| Dinagat Islands           | 2   | 1   | 0  | 14         | 0   |
| Eastern Samar             | 3   | 5   | 0  | 25         | 0   |
| Guimaras                  | 3   | 2   | 0  | 14         | 0   |
| Ifugao                    | 3   | 5   | 0  | 25         | 0   |
| Ilocos Norte              | 3   | 5   | 0  | 26         | 0   |
| Ilocos Sur                | 3   | 5   | 0  | 26         | 0   |
| Iloilo                    | 3   | 5   | 0  | 26         | 0   |
| Isabela                   | 2   | 5   | 0  | 26         | 0   |
| Kalinga                   | 3   | 5   | 0  | 24         | 0   |
| La Union                  | 3   | 5   | 0  | 26         | 0   |
| Laguna                    | 3   | 5   | 0  | 26         | 0   |
| Lanao Del Norte           | 3   | 5   | 0  | 26         | 0   |
| Lanao Del Sur             | 3   | 5   | 0  | 26         | 0   |
| Leyte                     | 3   | 5   | 0  | 26         | 0   |
| Maguindanao               | 3   | 5   | 0  | 19         | 0   |
| Marinduque                | 3   | 5   | 0  | 26         | 0   |
| Masbate                   | 3   | 5   | 0  | 26         | 0   |

**Appendix Table 5. Number of 5q0 data sources by type and location, 1950-2021**

| Location                 | SBH | CBH | HH | VR/SRS/DSP | DSS |
|--------------------------|-----|-----|----|------------|-----|
| Misamis Occidental       | 3   | 5   | 0  | 26         | 0   |
| Misamis Oriental         | 3   | 5   | 0  | 26         | 0   |
| Mountain Province        | 3   | 4   | 0  | 14         | 0   |
| National Capital Region  | 3   | 5   | 0  | 14         | 0   |
| Negros Occidental        | 3   | 5   | 0  | 26         | 0   |
| Negros Oriental          | 3   | 2   | 0  | 26         | 0   |
| Northern Samar           | 3   | 5   | 0  | 25         | 0   |
| Nueva Ecija              | 3   | 5   | 0  | 25         | 0   |
| Nueva Vizcaya            | 3   | 5   | 0  | 25         | 0   |
| Occidental Mindoro       | 3   | 5   | 0  | 26         | 0   |
| Oriental Mindoro         | 2   | 5   | 0  | 26         | 0   |
| Palawan                  | 3   | 5   | 0  | 14         | 0   |
| Pampanga                 | 2   | 5   | 0  | 26         | 0   |
| Pangasinan               | 2   | 5   | 0  | 26         | 0   |
| Quezon                   | 3   | 5   | 0  | 26         | 0   |
| Quirino                  | 3   | 4   | 0  | 20         | 0   |
| Rizal                    | 3   | 5   | 0  | 18         | 0   |
| Romblon                  | 3   | 5   | 0  | 26         | 0   |
| Samar (Western Samar)    | 3   | 5   | 0  | 26         | 0   |
| Sarangani                | 2   | 5   | 0  | 14         | 0   |
| Siquijor                 | 3   | 1   | 0  | 20         | 0   |
| Sorsogon                 | 3   | 5   | 0  | 26         | 0   |
| South Cotabato           | 3   | 5   | 0  | 24         | 0   |
| Southern Leyte           | 3   | 5   | 0  | 25         | 0   |
| Sultan Kudarat           | 3   | 5   | 0  | 19         | 0   |
| Sulu                     | 3   | 5   | 0  | 23         | 0   |
| Surigao Del Norte        | 3   | 5   | 0  | 26         | 0   |
| Surigao Del Sur          | 3   | 5   | 0  | 26         | 0   |
| Tarlac                   | 3   | 5   | 0  | 26         | 0   |
| Tawi-Tawi                | 3   | 2   | 0  | 17         | 0   |
| Zambales                 | 3   | 4   | 0  | 26         | 0   |
| Zamboanga Del Norte      | 3   | 5   | 0  | 26         | 0   |
| Zamboanga Del Sur        | 3   | 5   | 0  | 26         | 0   |
| Zamboanga Sibugay        | 3   | 5   | 0  | 14         | 0   |
| Seychelles               | 2   | 0   | 0  | 69         | 0   |
| Sri Lanka                | 5   | 2   | 4  | 61         | 0   |
| Thailand                 | 11  | 2   | 0  | 69         | 0   |
| Timor-Leste              | 9   | 6   | 0  | 0          | 0   |
| Viet Nam                 | 16  | 3   | 0  | 0          | 0   |
| Angola                   | 5   | 2   | 0  | 0          | 0   |
| Central African Republic | 5   | 1   | 0  | 0          | 0   |
| Congo (Brazzaville)      | 5   | 4   | 0  | 0          | 0   |
| DR Congo                 | 5   | 2   | 1  | 0          | 0   |
| Equatorial Guinea        | 1   | 0   | 1  | 0          | 0   |
| Gabon                    | 2   | 2   | 0  | 0          | 0   |
| Burundi                  | 8   | 3   | 0  | 0          | 0   |
| Comoros                  | 4   | 2   | 1  | 0          | 0   |
| Djibouti                 | 3   | 1   | 0  | 0          | 0   |
| Eritrea                  | 3   | 2   | 0  | 0          | 0   |
| Ethiopia                 | 8   | 5   | 1  | 0          | 0   |
| Addis Ababa              | 3   | 4   | 1  | 0          | 0   |
| Afar                     | 4   | 5   | 1  | 0          | 0   |
| Amhara                   | 4   | 5   | 1  | 0          | 0   |
| Benishangul-Gumuz        | 3   | 4   | 1  | 0          | 0   |
| Dire Dawa                | 4   | 5   | 1  | 0          | 0   |
| Gambella                 | 4   | 5   | 1  | 0          | 0   |
| Harari                   | 4   | 5   | 1  | 0          | 0   |

**Appendix Table 5. Number of 5q0 data sources by type and location, 1950-2021**

| Location                                     | SBH | CBH | HH | VR/SRS/DSP | DSS |
|----------------------------------------------|-----|-----|----|------------|-----|
| Oromia                                       | 4   | 4   | 1  | 0          | 0   |
| Somali                                       | 4   | 5   | 1  | 0          | 0   |
| Southern Nations, Nationalities, and Peoples | 4   | 4   | 1  | 0          | 0   |
| Tigray                                       | 4   | 5   | 1  | 0          | 0   |
| Kenya                                        | 19  | 7   | 0  | 0          | 0   |
| Baringo                                      | 12  | 5   | 0  | 0          | 0   |
| Bomet                                        | 9   | 3   | 0  | 0          | 0   |
| Bungoma                                      | 13  | 7   | 0  | 0          | 0   |
| Busia                                        | 12  | 6   | 0  | 0          | 0   |
| Elgeyo Marakwet                              | 12  | 6   | 0  | 0          | 0   |
| Embu                                         | 14  | 7   | 0  | 0          | 0   |
| Garissa                                      | 10  | 3   | 0  | 0          | 0   |
| Homa Bay                                     | 9   | 4   | 0  | 0          | 0   |
| Isiolo                                       | 11  | 4   | 0  | 0          | 0   |
| Kajiado                                      | 12  | 5   | 0  | 0          | 0   |
| Kakamega                                     | 12  | 7   | 0  | 0          | 0   |
| Kericho                                      | 13  | 6   | 0  | 0          | 0   |
| Kiambu                                       | 13  | 6   | 0  | 0          | 0   |
| Kilifi                                       | 13  | 6   | 0  | 0          | 0   |
| Kirinyaga                                    | 12  | 6   | 0  | 0          | 0   |
| Kisii                                        | 12  | 7   | 0  | 0          | 0   |
| Kisumu                                       | 12  | 7   | 0  | 0          | 0   |
| Kitui                                        | 15  | 7   | 0  | 0          | 0   |
| Kwale                                        | 12  | 6   | 0  | 0          | 0   |
| Laikipia                                     | 13  | 5   | 0  | 0          | 0   |
| Lamu                                         | 10  | 4   | 0  | 0          | 0   |
| Machakos                                     | 15  | 7   | 0  | 0          | 0   |
| Makueni                                      | 11  | 4   | 0  | 0          | 0   |
| Mandera                                      | 10  | 3   | 0  | 0          | 0   |
| Marsabit                                     | 9   | 4   | 0  | 0          | 0   |
| Meru                                         | 12  | 7   | 0  | 0          | 0   |
| Migori                                       | 9   | 4   | 0  | 0          | 0   |
| Mombasa                                      | 12  | 7   | 0  | 0          | 0   |
| Murang'a                                     | 12  | 6   | 0  | 0          | 0   |
| Nairobi                                      | 11  | 6   | 0  | 0          | 0   |
| Nakuru                                       | 12  | 6   | 0  | 0          | 0   |
| Nandi                                        | 13  | 6   | 0  | 0          | 0   |
| Narok                                        | 11  | 6   | 0  | 0          | 0   |
| Nyamira                                      | 10  | 4   | 0  | 0          | 0   |
| Nyandarua                                    | 11  | 6   | 0  | 0          | 0   |
| Nyeri                                        | 11  | 6   | 0  | 0          | 0   |
| Samburu                                      | 8   | 3   | 0  | 0          | 0   |
| Siaya                                        | 13  | 7   | 0  | 0          | 0   |
| Taita Taveta                                 | 12  | 6   | 0  | 0          | 0   |
| Tana River                                   | 10  | 3   | 0  | 0          | 0   |
| Tharaka Nithi                                | 10  | 4   | 0  | 0          | 0   |
| Trans Nzoia                                  | 12  | 6   | 0  | 0          | 0   |
| Turkana                                      | 9   | 4   | 0  | 0          | 0   |
| Uasin Gishu                                  | 12  | 6   | 0  | 0          | 0   |
| Vihiga                                       | 9   | 3   | 0  | 0          | 0   |
| Wajir                                        | 10  | 3   | 0  | 0          | 0   |
| West Pokot                                   | 12  | 5   | 0  | 0          | 0   |
| Madagascar                                   | 10  | 4   | 2  | 14         | 0   |
| Malawi                                       | 19  | 8   | 3  | 0          | 0   |
| Mozambique                                   | 9   | 4   | 0  | 0          | 0   |
| Rwanda                                       | 13  | 7   | 1  | 0          | 0   |
| Somalia                                      | 2   | 1   | 0  | 0          | 0   |

**Appendix Table 5. Number of 5q0 data sources by type and location, 1950-2021**

| Location              | SBH | CBH | HH | VR/SRS/DSP | DSS |
|-----------------------|-----|-----|----|------------|-----|
| South Sudan           | 2   | 1   | 0  | 0          | 0   |
| Uganda                | 18  | 7   | 0  | 0          | 0   |
| Tanzania              | 14  | 7   | 1  | 0          | 0   |
| Zambia                | 11  | 5   | 1  | 0          | 0   |
| Botswana              | 9   | 2   | 1  | 0          | 0   |
| Eswatini              | 4   | 3   | 0  | 0          | 0   |
| Lesotho               | 10  | 4   | 1  | 0          | 0   |
| Namibia               | 5   | 4   | 0  | 0          | 0   |
| South Africa          | 9   | 2   | 4  | 32         | 0   |
| Eastern Cape          | 7   | 2   | 7  | 21         | 0   |
| Free State            | 7   | 2   | 7  | 21         | 0   |
| Gauteng               | 7   | 2   | 3  | 21         | 0   |
| KwaZulu-Natal         | 8   | 2   | 6  | 21         | 0   |
| Limpopo               | 7   | 2   | 7  | 21         | 0   |
| Mpumalanga            | 7   | 2   | 5  | 21         | 0   |
| North West            | 7   | 2   | 6  | 21         | 0   |
| Northern Cape         | 6   | 2   | 5  | 21         | 0   |
| Western Cape          | 7   | 1   | 6  | 21         | 0   |
| Zimbabwe              | 9   | 8   | 2  | 2          | 0   |
| Benin                 | 9   | 7   | 2  | 0          | 0   |
| Burkina Faso          | 12  | 4   | 4  | 0          | 0   |
| Cabo Verde            | 3   | 1   | 1  | 24         | 0   |
| Cameroon              | 9   | 6   | 1  | 0          | 0   |
| Chad                  | 5   | 3   | 1  | 0          | 0   |
| Côte d'Ivoire         | 6   | 10  | 0  | 0          | 0   |
| The Gambia            | 5   | 1   | 4  | 0          | 0   |
| Ghana                 | 20  | 9   | 2  | 0          | 0   |
| Guinea                | 4   | 4   | 2  | 0          | 0   |
| Guinea-Bissau         | 4   | 1   | 1  | 0          | 0   |
| Liberia               | 7   | 5   | 1  | 0          | 0   |
| Mali                  | 10  | 6   | 1  | 0          | 0   |
| Mauritania            | 8   | 5   | 1  | 0          | 0   |
| Niger                 | 5   | 4   | 0  | 0          | 0   |
| Nigeria               | 22  | 6   | 1  | 0          | 0   |
| São Tomé and Príncipe | 6   | 2   | 1  | 20         | 0   |
| Senegal               | 13  | 13  | 2  | 0          | 0   |
| Sierra Leone          | 6   | 3   | 1  | 5          | 0   |
| Togo                  | 8   | 3   | 3  | 0          | 0   |

**Appendix Table S6: 5q0 reference sources by source date and location, 1950–2021**

| Location               | Year Range of Data                                                   | Reference Source                       | Data Type |
|------------------------|----------------------------------------------------------------------|----------------------------------------|-----------|
| Armenia                | 1975-2015                                                            | Standard Demographic and Health Survey | CBH       |
| Azerbaijan             | 1981-2006                                                            | Standard Demographic and Health Survey | CBH       |
| Georgia                | 2003-2021                                                            | Vital Registration                     | VR/SRS    |
| Georgia                | 1978-2011                                                            | Reproductive Health Survey             | CBH       |
| Georgia                | 1975-2004                                                            | Reproductive Health Survey             | SBH       |
| Georgia                | 1981-2005                                                            | Multiple Indicator Cluster Survey      | SBH       |
| Kazakhstan             | 2010-2020                                                            | Vital Registration                     | VR/SRS    |
| Kazakhstan             | 1981-2010                                                            | Multiple Indicator Cluster Survey      | SBH       |
| Kyrgyzstan             | 2007-2019                                                            | Vital Registration                     | VR/SRS    |
| Kyrgyzstan             | 1974-2012                                                            | Standard Demographic and Health Survey | CBH       |
| Mongolia               | 1974-1999                                                            | Reproductive Health Survey             | CBH       |
| Mongolia               | 1986-2016                                                            | Multiple Indicator Cluster Survey      | CBH       |
| Tajikistan             | 1987-2017                                                            | Standard Demographic and Health Survey | CBH       |
| Turkmenistan           | 1987, 1992, 1997                                                     | Standard Demographic and Health Survey | CBH       |
| Turkmenistan           | 1992-2015                                                            | Multiple Indicator Cluster Survey      | CBH       |
| Uzbekistan             | 1973-1996                                                            | Standard Demographic and Health Survey | CBH       |
| Albania                | 1983-2008                                                            | Standard Demographic and Health Survey | CBH       |
| Bosnia and Herzegovina | 1950-1991, 1998-2020                                                 | Vital Registration                     | VR/SRS    |
| Bulgaria               | 1950-2021                                                            | Vital Registration                     | VR/SRS    |
| Croatia                | 1950-2013, 2015-2021                                                 | Vital Registration                     | VR/SRS    |
| Czechia                | 1950-2021                                                            | Vital Registration                     | VR/SRS    |
| Hungary                | 1950-2021                                                            | Vital Registration                     | VR/SRS    |
| Montenegro             | 1989-2011                                                            | Multiple Indicator Cluster Survey      | SBH       |
| North Macedonia        | 1950-2020                                                            | Vital Registration                     | VR/SRS    |
| Poland                 | 1950-2021                                                            | Vital Registration                     | VR/SRS    |
| Romania                | 1956-2021                                                            | Vital Registration                     | VR/SRS    |
| Serbia                 | 1950-1952, 1954-1960, 1962-1970, 1972-1990, 1995-1997, 2008-2021     | Vital Registration                     | VR/SRS    |
| Slovakia               | 1950-2021                                                            | Vital Registration                     | VR/SRS    |
| Slovenia               | 1950-2021                                                            | Vital Registration                     | VR/SRS    |
| Belarus                | 1969, 1972, 1976, 1979-1980, 1982-1983, 1986, 1990, 1993, 1996, 1998 | Census                                 | SBH       |
| Belarus                | 1981-2004                                                            | Multiple Indicator Cluster Survey      | SBH       |
| Estonia                | 1959-2021                                                            | Vital Registration                     | VR/SRS    |
| Latvia                 | 1960-2021                                                            | Vital Registration                     | VR/SRS    |
| Lithuania              | 1959-2021                                                            | Vital Registration                     | VR/SRS    |
| Moldova                | 1980-2005                                                            | Standard Demographic and Health Survey | CBH       |
| Russia                 | 1959-2021                                                            | Vital Registration                     | VR/SRS    |
| Ukraine                | 1998-2016                                                            | Vital Registration                     | VR/SRS    |
| Ukraine                | 1982-2007                                                            | Standard Demographic and Health Survey | CBH       |
| Australia              | 1950-2020                                                            | Vital Registration                     | VR/SRS    |
| New Zealand            | 1950-2021                                                            | Vital Registration                     | VR/SRS    |
| Brunei                 | 1950-1959, 1964-1978, 1982-1992, 1995-2020                           | Vital Registration                     | VR/SRS    |
| Japan                  | 1950-2021                                                            | Vital Registration                     | VR/SRS    |
| Aichi                  | 1979-2021                                                            | Vital Registration                     | VR/SRS    |
| Akita                  | 1979-2021                                                            | Vital Registration                     | VR/SRS    |
| Aomori                 | 1979-2021                                                            | Vital Registration                     | VR/SRS    |
| Chiba                  | 1979-2021                                                            | Vital Registration                     | VR/SRS    |
| Ehime                  | 1979-2021                                                            | Vital Registration                     | VR/SRS    |
| Fukui                  | 1979-2021                                                            | Vital Registration                     | VR/SRS    |
| Fukuoka                | 1979-2021                                                            | Vital Registration                     | VR/SRS    |
| Fukushima              | 1979-2021                                                            | Vital Registration                     | VR/SRS    |
| Gifu                   | 1979-2021                                                            | Vital Registration                     | VR/SRS    |
| Gunma                  | 1979-2021                                                            | Vital Registration                     | VR/SRS    |
| Hiroshima              | 1979-2021                                                            | Vital Registration                     | VR/SRS    |
| Hokkaidō               | 1979-2021                                                            | Vital Registration                     | VR/SRS    |
| Hyōgo                  | 1979-1994, 1996-2021                                                 | Vital Registration                     | VR/SRS    |
| Ibaraki                | 1979-2021                                                            | Vital Registration                     | VR/SRS    |
| Ishikawa               | 1979-2021                                                            | Vital Registration                     | VR/SRS    |
| Iwate                  | 1979-2010, 2012-2021                                                 | Vital Registration                     | VR/SRS    |
| Kagawa                 | 1979-2021                                                            | Vital Registration                     | VR/SRS    |
| Kagoshima              | 1979-2021                                                            | Vital Registration                     | VR/SRS    |
| Kanagawa               | 1979-2021                                                            | Vital Registration                     | VR/SRS    |
| Kōchi                  | 1979-2021                                                            | Vital Registration                     | VR/SRS    |
| Kumamoto               | 1979-2021                                                            | Vital Registration                     | VR/SRS    |
| Kyōto                  | 1979-2021                                                            | Vital Registration                     | VR/SRS    |
| Mie                    | 1979-2021                                                            | Vital Registration                     | VR/SRS    |
| Miyagi                 | 1979-2010, 2012-2021                                                 | Vital Registration                     | VR/SRS    |
| Miyazaki               | 1979-2021                                                            | Vital Registration                     | VR/SRS    |

|                |                                 |                        |        |
|----------------|---------------------------------|------------------------|--------|
| Nagano         | 1979-2021                       | Vital Registration     | VR/SRS |
| Nagasaki       | 1979-2021                       | Vital Registration     | VR/SRS |
| Nara           | 1979-2021                       | Vital Registration     | VR/SRS |
| Niigata        | 1979-2021                       | Vital Registration     | VR/SRS |
| Ōita           | 1979-2021                       | Vital Registration     | VR/SRS |
| Okayama        | 1979-2021                       | Vital Registration     | VR/SRS |
| Okinawa        | 1979-2021                       | Vital Registration     | VR/SRS |
| Ōsaka          | 1979-2021                       | Vital Registration     | VR/SRS |
| Saga           | 1979-2021                       | Vital Registration     | VR/SRS |
| Saitama        | 1979-2021                       | Vital Registration     | VR/SRS |
| Shiga          | 1979-2021                       | Vital Registration     | VR/SRS |
| Shimane        | 1979-2021                       | Vital Registration     | VR/SRS |
| Shizuoka       | 1979-2021                       | Vital Registration     | VR/SRS |
| Tochigi        | 1979-2021                       | Vital Registration     | VR/SRS |
| Tokushima      | 1979-2021                       | Vital Registration     | VR/SRS |
| Tōkyō          | 1979-2021                       | Vital Registration     | VR/SRS |
| Tottori        | 1979-2021                       | Vital Registration     | VR/SRS |
| Toyama         | 1979-2021                       | Vital Registration     | VR/SRS |
| Wakayama       | 1979-2021                       | Vital Registration     | VR/SRS |
| Yamagata       | 1979-2021                       | Vital Registration     | VR/SRS |
| Yamaguchi      | 1979-2021                       | Vital Registration     | VR/SRS |
| Yamanashi      | 1979-2021                       | Vital Registration     | VR/SRS |
| South Korea    | 1999-2020                       | Vital Registration     | VR/SRS |
| South Korea    | 1954-1974                       | World Fertility Survey | CBH    |
| Singapore      | 1950-2021                       | Vital Registration     | VR/SRS |
| Canada         | 1950-2013, 2016-2020            | Vital Registration     | VR/SRS |
| Greenland      | 1952-1965, 1967-1978, 1988-2021 | Vital Registration     | VR/SRS |
| USA            | 1950-2020                       | Vital Registration     | VR/SRS |
| Alabama        | 1959-2020                       | Vital Registration     | VR/SRS |
| Alaska         | 1959-2020                       | Vital Registration     | VR/SRS |
| Arizona        | 1959-2020                       | Vital Registration     | VR/SRS |
| Arkansas       | 1959-2020                       | Vital Registration     | VR/SRS |
| California     | 1959-2020                       | Vital Registration     | VR/SRS |
| Colorado       | 1959-2020                       | Vital Registration     | VR/SRS |
| Connecticut    | 1959-2020                       | Vital Registration     | VR/SRS |
| Delaware       | 1959-2020                       | Vital Registration     | VR/SRS |
| Washington, DC | 1959-2020                       | Vital Registration     | VR/SRS |
| Florida        | 1959-2020                       | Vital Registration     | VR/SRS |
| Georgia        | 1959-2020                       | Vital Registration     | VR/SRS |
| Hawaii         | 1959-2020                       | Vital Registration     | VR/SRS |
| Idaho          | 1959-2020                       | Vital Registration     | VR/SRS |
| Illinois       | 1959-2020                       | Vital Registration     | VR/SRS |
| Indiana        | 1959-2020                       | Vital Registration     | VR/SRS |
| Iowa           | 1959-2020                       | Vital Registration     | VR/SRS |
| Kansas         | 1959-2020                       | Vital Registration     | VR/SRS |
| Kentucky       | 1959-2020                       | Vital Registration     | VR/SRS |
| Louisiana      | 1959-2020                       | Vital Registration     | VR/SRS |
| Maine          | 1959-2020                       | Vital Registration     | VR/SRS |
| Maryland       | 1959-2020                       | Vital Registration     | VR/SRS |
| Massachusetts  | 1959-2020                       | Vital Registration     | VR/SRS |
| Michigan       | 1959-2020                       | Vital Registration     | VR/SRS |
| Minnesota      | 1959-2020                       | Vital Registration     | VR/SRS |
| Mississippi    | 1959-2020                       | Vital Registration     | VR/SRS |
| Missouri       | 1959-2020                       | Vital Registration     | VR/SRS |
| Montana        | 1959-2020                       | Vital Registration     | VR/SRS |
| Nebraska       | 1959-2020                       | Vital Registration     | VR/SRS |
| Nevada         | 1959-2020                       | Vital Registration     | VR/SRS |
| New Hampshire  | 1959-2020                       | Vital Registration     | VR/SRS |
| New Jersey     | 1959-2020                       | Vital Registration     | VR/SRS |
| New Mexico     | 1959-2020                       | Vital Registration     | VR/SRS |
| New York       | 1959-2020                       | Vital Registration     | VR/SRS |
| North Carolina | 1959-2020                       | Vital Registration     | VR/SRS |
| North Dakota   | 1959-2020                       | Vital Registration     | VR/SRS |
| Ohio           | 1959-2020                       | Vital Registration     | VR/SRS |
| Oklahoma       | 1959-2020                       | Vital Registration     | VR/SRS |
| Oregon         | 1959-2020                       | Vital Registration     | VR/SRS |
| Pennsylvania   | 1959-2020                       | Vital Registration     | VR/SRS |
| Rhode Island   | 1959-2020                       | Vital Registration     | VR/SRS |
| South Carolina | 1959-2020                       | Vital Registration     | VR/SRS |

|                               |                                                                                   |                    |        |
|-------------------------------|-----------------------------------------------------------------------------------|--------------------|--------|
| South Dakota                  | 1959-2020                                                                         | Vital Registration | VR/SRS |
| Tennessee                     | 1959-2020                                                                         | Vital Registration | VR/SRS |
| Texas                         | 1959-2020                                                                         | Vital Registration | VR/SRS |
| Utah                          | 1959-2020                                                                         | Vital Registration | VR/SRS |
| Vermont                       | 1959-2020                                                                         | Vital Registration | VR/SRS |
| Virginia                      | 1959-2020                                                                         | Vital Registration | VR/SRS |
| Washington                    | 1959-2020                                                                         | Vital Registration | VR/SRS |
| West Virginia                 | 1959-2020                                                                         | Vital Registration | VR/SRS |
| Wisconsin                     | 1959-2020                                                                         | Vital Registration | VR/SRS |
| Wyoming                       | 1959-2020                                                                         | Vital Registration | VR/SRS |
| Argentina                     | 1950-1956, 1958-1970, 1976-2019                                                   | Vital Registration | VR/SRS |
| Chile                         | 1950-2021                                                                         | Vital Registration | VR/SRS |
| Uruguay                       | 1950-2009, 2012-2019                                                              | Vital Registration | VR/SRS |
| Andorra                       | 1992, 1994, 2002-2020                                                             | Vital Registration | VR/SRS |
| Austria                       | 1950-2021                                                                         | Vital Registration | VR/SRS |
| Belgium                       | 1950-2020                                                                         | Vital Registration | VR/SRS |
| Cyprus                        | 1974-2021                                                                         | Vital Registration | VR/SRS |
| Denmark                       | 1950-2021                                                                         | Vital Registration | VR/SRS |
| Finland                       | 1950-2021                                                                         | Vital Registration | VR/SRS |
| France                        | 1950-2016, 2018-2021                                                              | Vital Registration | VR/SRS |
| Germany                       | 1956-2021                                                                         | Vital Registration | VR/SRS |
| Greece                        | 1951-2021                                                                         | Vital Registration | VR/SRS |
| Iceland                       | 1950-2021                                                                         | Vital Registration | VR/SRS |
| Ireland                       | 1950-2015, 2017, 2019-2021                                                        | Vital Registration | VR/SRS |
| Israel                        | 1950-2020                                                                         | Vital Registration | VR/SRS |
| Italy                         | 1950-2021                                                                         | Vital Registration | VR/SRS |
| Abruzzo                       | 1969-2021                                                                         | Vital Registration | VR/SRS |
| Basilicata                    | 1969-2021                                                                         | Vital Registration | VR/SRS |
| Calabria                      | 1969-2021                                                                         | Vital Registration | VR/SRS |
| Campania                      | 1969-2021                                                                         | Vital Registration | VR/SRS |
| Emilia-Romagna                | 1969-2021                                                                         | Vital Registration | VR/SRS |
| Friuli-Venezia Giulia         | 1969-2021                                                                         | Vital Registration | VR/SRS |
| Lazio                         | 1969-2021                                                                         | Vital Registration | VR/SRS |
| Liguria                       | 1969-2021                                                                         | Vital Registration | VR/SRS |
| Lombardia                     | 1969-2021                                                                         | Vital Registration | VR/SRS |
| Marche                        | 1969-2021                                                                         | Vital Registration | VR/SRS |
| Molise                        | 1969-2021                                                                         | Vital Registration | VR/SRS |
| Piemonte                      | 1969-2021                                                                         | Vital Registration | VR/SRS |
| Provincia autonoma di Bolzano | 1969-2020                                                                         | Vital Registration | VR/SRS |
| Provincia autonoma di Trento  | 1969-2020                                                                         | Vital Registration | VR/SRS |
| Puglia                        | 1969-2021                                                                         | Vital Registration | VR/SRS |
| Sardegna                      | 1969-2021                                                                         | Vital Registration | VR/SRS |
| Sicilia                       | 1969-2021                                                                         | Vital Registration | VR/SRS |
| Toscana                       | 1969-2021                                                                         | Vital Registration | VR/SRS |
| Umbria                        | 1969-2021                                                                         | Vital Registration | VR/SRS |
| Valle d'Aosta                 | 1969-2021                                                                         | Vital Registration | VR/SRS |
| Veneto                        | 1969-2021                                                                         | Vital Registration | VR/SRS |
| Luxembourg                    | 1950-2021                                                                         | Vital Registration | VR/SRS |
| Malta                         | 1950-2021                                                                         | Vital Registration | VR/SRS |
| Monaco                        | 1950-1953, 1959, 1963, 1966, 1970, 1983                                           | Vital Registration | VR/SRS |
| Netherlands                   | 1950-1995, 1998-2021                                                              | Vital Registration | VR/SRS |
| Norway                        | 1950-2021                                                                         | Vital Registration | VR/SRS |
| Agder                         | 1951-2020                                                                         | Vital Registration | VR/SRS |
| Innlandet                     | 1951-2020                                                                         | Vital Registration | VR/SRS |
| Møre og Romsdal               | 1951-2020                                                                         | Vital Registration | VR/SRS |
| Nordland                      | 1951-2020                                                                         | Vital Registration | VR/SRS |
| Oslo                          | 1951-2020                                                                         | Vital Registration | VR/SRS |
| Rogaland                      | 1951-2020                                                                         | Vital Registration | VR/SRS |
| Troms og Finnmark             | 1951-2020                                                                         | Vital Registration | VR/SRS |
| Trøndelag                     | 1951-2020                                                                         | Vital Registration | VR/SRS |
| Vestfold og Telemark          | 1951-2020                                                                         | Vital Registration | VR/SRS |
| Vestland                      | 1951-2020                                                                         | Vital Registration | VR/SRS |
| Viken                         | 1951-2020                                                                         | Vital Registration | VR/SRS |
| Portugal                      | 1950-1974, 1977-2004, 2006-2021                                                   | Vital Registration | VR/SRS |
| San Marino                    | 1962, 1964-1975, 1977-1978, 1980-1989, 1992-1996, 1998-1999, 2001-2004, 2008-2020 | Vital Registration | VR/SRS |
| Spain                         | 1950-2021                                                                         | Vital Registration | VR/SRS |
| Sweden                        | 1950-2021                                                                         | Vital Registration | VR/SRS |
| Stockholm                     | 1980-1986, 1990-2019                                                              | Vital Registration | VR/SRS |
| Sweden except Stockholm       | 1980-1986, 1990-2019                                                              | Vital Registration | VR/SRS |

|                        |                      |                    |        |
|------------------------|----------------------|--------------------|--------|
| Switzerland            | 1950-2021            | Vital Registration | VR/SRS |
| UK                     | 1950-1999, 2001-2020 | Vital Registration | VR/SRS |
| England                | 1981-2021            | Vital Registration | VR/SRS |
| East Midlands          | 1981-2017, 2019      | Vital Registration | VR/SRS |
| Derby                  | 1981-2021            | Vital Registration | VR/SRS |
| Derbyshire             | 1981-2021            | Vital Registration | VR/SRS |
| Leicester              | 1981-2021            | Vital Registration | VR/SRS |
| Leicestershire         | 1981-2021            | Vital Registration | VR/SRS |
| Lincolnshire           | 1981-2021            | Vital Registration | VR/SRS |
| Northamptonshire       | 1981-2020            | Vital Registration | VR/SRS |
| Nottingham             | 1981-2021            | Vital Registration | VR/SRS |
| Nottinghamshire        | 1981-2021            | Vital Registration | VR/SRS |
| Rutland                | 1981-2021            | Vital Registration | VR/SRS |
| East of England        | 1981-2017, 2019      | Vital Registration | VR/SRS |
| Bedford                | 1981-2021            | Vital Registration | VR/SRS |
| Cambridgeshire         | 1981-2021            | Vital Registration | VR/SRS |
| Central Bedfordshire   | 1981-2021            | Vital Registration | VR/SRS |
| Essex                  | 1981-2021            | Vital Registration | VR/SRS |
| Hertfordshire          | 1981-2021            | Vital Registration | VR/SRS |
| Luton                  | 1981-2021            | Vital Registration | VR/SRS |
| Norfolk                | 1981-2021            | Vital Registration | VR/SRS |
| Peterborough           | 1981-2021            | Vital Registration | VR/SRS |
| Southend-on-Sea        | 1981-2021            | Vital Registration | VR/SRS |
| Suffolk                | 1981-2021            | Vital Registration | VR/SRS |
| Thurrock               | 1981-2021            | Vital Registration | VR/SRS |
| Greater London         | 1981-2017, 2019      | Vital Registration | VR/SRS |
| Barking and Dagenham   | 1981-2021            | Vital Registration | VR/SRS |
| Barnet                 | 1981-2021            | Vital Registration | VR/SRS |
| Bexley                 | 1981-2021            | Vital Registration | VR/SRS |
| Brent                  | 1981-2021            | Vital Registration | VR/SRS |
| Bromley                | 1981-2021            | Vital Registration | VR/SRS |
| Camden                 | 1981-2021            | Vital Registration | VR/SRS |
| Croydon                | 1981-2021            | Vital Registration | VR/SRS |
| Ealing                 | 1981-2021            | Vital Registration | VR/SRS |
| Enfield                | 1981-2021            | Vital Registration | VR/SRS |
| Greenwich              | 1981-2021            | Vital Registration | VR/SRS |
| Hackney                | 1981-2017, 2019      | Vital Registration | VR/SRS |
| Hammersmith and Fulham | 1981-2021            | Vital Registration | VR/SRS |
| Haringey               | 1981-2021            | Vital Registration | VR/SRS |
| Harrow                 | 1981-2021            | Vital Registration | VR/SRS |
| Havering               | 1981-2021            | Vital Registration | VR/SRS |
| Hillingdon             | 1981-2021            | Vital Registration | VR/SRS |
| Hounslow               | 1981-2021            | Vital Registration | VR/SRS |
| Islington              | 1981-2021            | Vital Registration | VR/SRS |
| Kensington and Chelsea | 1981-2021            | Vital Registration | VR/SRS |
| Kingston upon Thames   | 1981-2021            | Vital Registration | VR/SRS |
| Lambeth                | 1981-2021            | Vital Registration | VR/SRS |
| Lewisham               | 1981-2021            | Vital Registration | VR/SRS |
| Merton                 | 1981-2021            | Vital Registration | VR/SRS |
| Newham                 | 1981-2021            | Vital Registration | VR/SRS |
| Redbridge              | 1981-2021            | Vital Registration | VR/SRS |
| Richmond upon Thames   | 1981-2021            | Vital Registration | VR/SRS |
| Southwark              | 1981-2021            | Vital Registration | VR/SRS |
| Sutton                 | 1981-2021            | Vital Registration | VR/SRS |
| Tower Hamlets          | 1981-2021            | Vital Registration | VR/SRS |
| Waltham Forest         | 1981-2021            | Vital Registration | VR/SRS |
| Wandsworth             | 1981-2021            | Vital Registration | VR/SRS |
| Westminster            | 1981-2021            | Vital Registration | VR/SRS |
| North East England     | 1981-2017, 2019      | Vital Registration | VR/SRS |
| County Durham          | 1981-2021            | Vital Registration | VR/SRS |
| Darlington             | 1981-2021            | Vital Registration | VR/SRS |
| Gateshead              | 1981-2021            | Vital Registration | VR/SRS |
| Hartlepool             | 1981-2021            | Vital Registration | VR/SRS |
| Middlesbrough          | 1981-2021            | Vital Registration | VR/SRS |
| Newcastle upon Tyne    | 1981-2021            | Vital Registration | VR/SRS |
| North Tyneside         | 1981-2021            | Vital Registration | VR/SRS |
| Northumberland         | 1981-2021            | Vital Registration | VR/SRS |
| Redcar and Cleveland   | 1981-2021            | Vital Registration | VR/SRS |
| South Tyneside         | 1981-2021            | Vital Registration | VR/SRS |



|                              |                 |                    |        |
|------------------------------|-----------------|--------------------|--------|
| Stockton-on-Tees             | 1981-2021       | Vital Registration | VR/SRS |
| Sunderland                   | 1981-2021       | Vital Registration | VR/SRS |
| North West England           | 1981-2017, 2019 | Vital Registration | VR/SRS |
| Blackburn with Darwen        | 1981-2021       | Vital Registration | VR/SRS |
| Blackpool                    | 1981-2021       | Vital Registration | VR/SRS |
| Bolton                       | 1981-2021       | Vital Registration | VR/SRS |
| Bury                         | 1981-2021       | Vital Registration | VR/SRS |
| Cheshire East                | 1981-2021       | Vital Registration | VR/SRS |
| Cheshire West and Chester    | 1981-2021       | Vital Registration | VR/SRS |
| Cumbria                      | 1981-2021       | Vital Registration | VR/SRS |
| Halton                       | 1981-2021       | Vital Registration | VR/SRS |
| Knowsley                     | 1981-2021       | Vital Registration | VR/SRS |
| Lancashire                   | 1981-2021       | Vital Registration | VR/SRS |
| Liverpool                    | 1981-2021       | Vital Registration | VR/SRS |
| Manchester                   | 1981-2021       | Vital Registration | VR/SRS |
| Oldham                       | 1981-2021       | Vital Registration | VR/SRS |
| Rochdale                     | 1981-2021       | Vital Registration | VR/SRS |
| Salford                      | 1981-2021       | Vital Registration | VR/SRS |
| Sefton                       | 1981-2021       | Vital Registration | VR/SRS |
| St Helens                    | 1981-2021       | Vital Registration | VR/SRS |
| Stockport                    | 1981-2021       | Vital Registration | VR/SRS |
| Tameside                     | 1981-2021       | Vital Registration | VR/SRS |
| Trafford                     | 1981-2021       | Vital Registration | VR/SRS |
| Warrington                   | 1981-2021       | Vital Registration | VR/SRS |
| Wigan                        | 1981-2021       | Vital Registration | VR/SRS |
| Wirral                       | 1981-2021       | Vital Registration | VR/SRS |
| South East England           | 1981-2017, 2019 | Vital Registration | VR/SRS |
| Bracknell Forest             | 1981-2021       | Vital Registration | VR/SRS |
| Brighton and Hove            | 1981-2021       | Vital Registration | VR/SRS |
| Buckinghamshire              | 1981-2021       | Vital Registration | VR/SRS |
| East Sussex                  | 1981-2021       | Vital Registration | VR/SRS |
| Hampshire                    | 1981-2021       | Vital Registration | VR/SRS |
| Isle of Wight                | 1981-2021       | Vital Registration | VR/SRS |
| Kent                         | 1981-2021       | Vital Registration | VR/SRS |
| Medway                       | 1981-2021       | Vital Registration | VR/SRS |
| Milton Keynes                | 1981-2021       | Vital Registration | VR/SRS |
| Oxfordshire                  | 1981-2021       | Vital Registration | VR/SRS |
| Portsmouth                   | 1981-2021       | Vital Registration | VR/SRS |
| Reading                      | 1981-2021       | Vital Registration | VR/SRS |
| Slough                       | 1981-2021       | Vital Registration | VR/SRS |
| Southampton                  | 1981-2021       | Vital Registration | VR/SRS |
| Surrey                       | 1981-2021       | Vital Registration | VR/SRS |
| West Berkshire               | 1981-2021       | Vital Registration | VR/SRS |
| West Sussex                  | 1981-2021       | Vital Registration | VR/SRS |
| Windsor and Maidenhead       | 1981-2021       | Vital Registration | VR/SRS |
| Wokingham                    | 1981-2021       | Vital Registration | VR/SRS |
| South West England           | 1981-2017, 2019 | Vital Registration | VR/SRS |
| Bath and North East Somerset | 1981-2021       | Vital Registration | VR/SRS |
| Bournemouth                  | 1981-2020       | Vital Registration | VR/SRS |
| Bristol, City of             | 1981-2021       | Vital Registration | VR/SRS |
| Cornwall                     | 1981-2021       | Vital Registration | VR/SRS |
| Devon                        | 1981-2021       | Vital Registration | VR/SRS |
| Dorset                       | 1981-2021       | Vital Registration | VR/SRS |
| Gloucestershire              | 1981-2021       | Vital Registration | VR/SRS |
| North Somerset               | 1981-2021       | Vital Registration | VR/SRS |
| Plymouth                     | 1981-2021       | Vital Registration | VR/SRS |
| Poole                        | 1981-2020       | Vital Registration | VR/SRS |
| Somerset                     | 1981-2021       | Vital Registration | VR/SRS |
| South Gloucestershire        | 1981-2021       | Vital Registration | VR/SRS |
| Swindon                      | 1981-2021       | Vital Registration | VR/SRS |
| Torbay                       | 1981-2021       | Vital Registration | VR/SRS |
| Wiltshire                    | 1981-2021       | Vital Registration | VR/SRS |
| West Midlands                | 1981-2017, 2019 | Vital Registration | VR/SRS |
| Birmingham                   | 1981-2021       | Vital Registration | VR/SRS |
| Coventry                     | 1981-2021       | Vital Registration | VR/SRS |
| Dudley                       | 1981-2021       | Vital Registration | VR/SRS |
| Herefordshire, County of     | 1981-2021       | Vital Registration | VR/SRS |
| Sandwell                     | 1981-2021       | Vital Registration | VR/SRS |
| Shropshire                   | 1981-2021       | Vital Registration | VR/SRS |

|                                  |                                                                                          |                                        |        |
|----------------------------------|------------------------------------------------------------------------------------------|----------------------------------------|--------|
| Solihull                         | 1981-2021                                                                                | Vital Registration                     | VR/SRS |
| Staffordshire                    | 1981-2021                                                                                | Vital Registration                     | VR/SRS |
| Stoke-on-Trent                   | 1981-2021                                                                                | Vital Registration                     | VR/SRS |
| Telford and Wrekin               | 1981-2021                                                                                | Vital Registration                     | VR/SRS |
| Walsall                          | 1981-2021                                                                                | Vital Registration                     | VR/SRS |
| Warwickshire                     | 1981-2021                                                                                | Vital Registration                     | VR/SRS |
| Wolverhampton                    | 1981-2021                                                                                | Vital Registration                     | VR/SRS |
| Worcestershire                   | 1981-2021                                                                                | Vital Registration                     | VR/SRS |
| Yorkshire and the Humber         | 1981-2017, 2019                                                                          | Vital Registration                     | VR/SRS |
| Barnsley                         | 1981-2021                                                                                | Vital Registration                     | VR/SRS |
| Bradford                         | 1981-2021                                                                                | Vital Registration                     | VR/SRS |
| Calderdale                       | 1981-2021                                                                                | Vital Registration                     | VR/SRS |
| Doncaster                        | 1981-2021                                                                                | Vital Registration                     | VR/SRS |
| East Riding of Yorkshire         | 1981-2021                                                                                | Vital Registration                     | VR/SRS |
| Kingston upon Hull, City of      | 1981-2021                                                                                | Vital Registration                     | VR/SRS |
| Kirklees                         | 1981-2021                                                                                | Vital Registration                     | VR/SRS |
| Leeds                            | 1981-2021                                                                                | Vital Registration                     | VR/SRS |
| North East Lincolnshire          | 1981-2021                                                                                | Vital Registration                     | VR/SRS |
| North Lincolnshire               | 1981-2021                                                                                | Vital Registration                     | VR/SRS |
| North Yorkshire                  | 1981-2021                                                                                | Vital Registration                     | VR/SRS |
| Rotherham                        | 1981-2021                                                                                | Vital Registration                     | VR/SRS |
| Sheffield                        | 1981-2021                                                                                | Vital Registration                     | VR/SRS |
| Wakefield                        | 1981-2021                                                                                | Vital Registration                     | VR/SRS |
| York                             | 1981-2021                                                                                | Vital Registration                     | VR/SRS |
| Northern Ireland                 | 1950-1978, 1980-2020                                                                     | Vital Registration                     | VR/SRS |
| Scotland                         | 1950-2021                                                                                | Vital Registration                     | VR/SRS |
| Wales                            | 1981-2021                                                                                | Vital Registration                     | VR/SRS |
| Bolivia                          | 1961-2007                                                                                | Standard Demographic and Health Survey | CBH    |
| Ecuador                          | 1954-1994                                                                                | Vital Registration                     | VR/SRS |
| Ecuador                          | 1967-2004                                                                                | Reproductive Health Survey             | CBH    |
| Peru                             | 1961-2014                                                                                | Standard Demographic and Health Survey | CBH    |
| Antigua and Barbuda              | 1950-1966, 1969-1978, 1983, 1985-2009, 2012-2017, 2019-2020                              | Vital Registration                     | VR/SRS |
| The Bahamas                      | 1965, 1967-2015                                                                          | Vital Registration                     | VR/SRS |
| Barbados                         | 1950-1997, 2000-2013                                                                     | Vital Registration                     | VR/SRS |
| Belize                           | 1966-1991, 1993, 1996                                                                    | Census                                 | SBH    |
| Belize                           | 1973-1999                                                                                | Reproductive Health Survey             | CBH    |
| Belize                           | 1966-1999                                                                                | Reproductive Health Survey             | SBH    |
| Belize                           | 1990-2015                                                                                | Multiple Indicator Cluster Survey      | CBH    |
| Belize                           | 1981-2011                                                                                | Multiple Indicator Cluster Survey      | SBH    |
| Bermuda                          | 1950-2016, 2018                                                                          | Vital Registration                     | VR/SRS |
| Cuba                             | 1959-2020                                                                                | Vital Registration                     | VR/SRS |
| Dominica                         | 1950-1963, 1966-2015                                                                     | Vital Registration                     | VR/SRS |
| Dominican Republic               | 1959-2013                                                                                | Standard Demographic and Health Survey | CBH    |
| Grenada                          | 1950-1969, 1974-1978, 1985, 1988-2018                                                    | Vital Registration                     | VR/SRS |
| Guyana                           | 1982-2009                                                                                | Standard Demographic and Health Survey | CBH    |
| Haiti                            | 1971-2016                                                                                | Standard Demographic and Health Survey | CBH    |
| Jamaica                          | 1985, 1990, 1995                                                                         | Reproductive Health Survey             | CBH    |
| Jamaica                          | 1975-2005                                                                                | Multiple Indicator Cluster Survey      | SBH    |
| Puerto Rico                      | 1950-2020                                                                                | Vital Registration                     | VR/SRS |
| Saint Kitts and Nevis            | 1950-1996, 1998-2016                                                                     | Vital Registration                     | VR/SRS |
| Saint Lucia                      | 1950-1961, 1963, 1968, 1972-2006, 2008-2015                                              | Vital Registration                     | VR/SRS |
| Saint Vincent and the Grenadines | 1950-1956, 1960-1964, 1970-1972, 1974, 1977-1980, 1982-1988, 1990, 1992, 1995-2017, 2019 | Vital Registration                     | VR/SRS |
| Suriname                         | 1996, 2001, 2006, 2011, 2016                                                             | Multiple Indicator Cluster Survey      | CBH    |
| Suriname                         | 1975-2005                                                                                | Multiple Indicator Cluster Survey      | SBH    |
| Trinidad and Tobago              | 1962-1987                                                                                | Standard Demographic and Health Survey | CBH    |
| Virgin Islands                   | 1950-1966, 1971-1973, 1980-1987, 1989, 1993-2012, 2016-2020                              | Vital Registration                     | VR/SRS |
| Colombia                         | 1961-2015                                                                                | Standard Demographic and Health Survey | CBH    |
| Costa Rica                       | 1950, 1952-2021                                                                          | Vital Registration                     | VR/SRS |
| Costa Rica                       | 1950-1999                                                                                | Census                                 | SBH    |
| Costa Rica                       | 1969-1992                                                                                | Reproductive Health Survey             | CBH    |
| Costa Rica                       | 1961-1992                                                                                | Reproductive Health Survey             | SBH    |
| El Salvador                      | 1983-1984                                                                                | Standard Demographic and Health Survey | CBH    |
| Guatemala                        | 1966-1998                                                                                | Standard Demographic and Health Survey | CBH    |
| Guatemala                        | 1975-2008                                                                                | Reproductive Health Survey             | CBH    |
| Honduras                         | 1976-2011                                                                                | Standard Demographic and Health Survey | CBH    |
| Mexico                           | 1960-1987                                                                                | Standard Demographic and Health Survey | CBH    |
| Aguascalientes                   | 2010-2021                                                                                | Vital Registration                     | VR/SRS |
| Baja California                  | 1979-2021                                                                                | Vital Registration                     | VR/SRS |
| Baja California Sur              | 1979-2021                                                                                | Vital Registration                     | VR/SRS |

|                                 |                                 |                                        |        |
|---------------------------------|---------------------------------|----------------------------------------|--------|
| Campeche                        | 2010-2021                       | Vital Registration                     | VR/SRS |
| Chiapas                         | 2010-2021                       | Vital Registration                     | VR/SRS |
| Chihuahua                       | 2010-2021                       | Vital Registration                     | VR/SRS |
| Coahuila                        | 2010-2021                       | Vital Registration                     | VR/SRS |
| Colima                          | 2010-2021                       | Vital Registration                     | VR/SRS |
| Durango                         | 2010-2021                       | Vital Registration                     | VR/SRS |
| Guanajuato                      | 1979-2021                       | Vital Registration                     | VR/SRS |
| Guerrero                        | 1965-2015                       | Census                                 | SBH    |
| Guerrero                        | 1973-1992                       | Other Survey                           | CBH    |
| Guerrero                        | 1967-2014                       | Other Survey                           | SBH    |
| Hidalgo                         | 2010-2021                       | Vital Registration                     | VR/SRS |
| Jalisco                         | 2010-2021                       | Vital Registration                     | VR/SRS |
| México                          | 1979-2021                       | Vital Registration                     | VR/SRS |
| Mexico City                     | 1979-2015, 2017-2021            | Vital Registration                     | VR/SRS |
| Michoacán de Ocampo             | 1965-2015                       | Census                                 | SBH    |
| Michoacán de Ocampo             | 1971-1992                       | Other Survey                           | CBH    |
| Michoacán de Ocampo             | 1967-2014                       | Other Survey                           | SBH    |
| Morelos                         | 2010-2021                       | Vital Registration                     | VR/SRS |
| Nayarit                         | 2010-2021                       | Vital Registration                     | VR/SRS |
| Nuevo León                      | 2010-2021                       | Vital Registration                     | VR/SRS |
| Oaxaca                          | 1965-2015                       | Census                                 | SBH    |
| Oaxaca                          | 1971-1992                       | Other Survey                           | CBH    |
| Oaxaca                          | 1967-2014                       | Other Survey                           | SBH    |
| Puebla                          | 2010-2021                       | Vital Registration                     | VR/SRS |
| Querétaro                       | 1979-2021                       | Vital Registration                     | VR/SRS |
| Quintana Roo                    | 2010-2021                       | Vital Registration                     | VR/SRS |
| San Luis Potosí                 | 1965-2015                       | Census                                 | SBH    |
| San Luis Potosí                 | 1971-1992                       | Other Survey                           | CBH    |
| San Luis Potosí                 | 1967-2014                       | Other Survey                           | SBH    |
| Sinaloa                         | 2010-2021                       | Vital Registration                     | VR/SRS |
| Sonora                          | 2010-2021                       | Vital Registration                     | VR/SRS |
| Tabasco                         | 2005-2021                       | Vital Registration                     | VR/SRS |
| Tamaulipas                      | 2005-2021                       | Vital Registration                     | VR/SRS |
| Tlaxcala                        | 1979-2021                       | Vital Registration                     | VR/SRS |
| Veracruz de Ignacio de la Llave | 2010-2021                       | Vital Registration                     | VR/SRS |
| Yucatán                         | 2010-2021                       | Vital Registration                     | VR/SRS |
| Zacatecas                       | 2010-2021                       | Vital Registration                     | VR/SRS |
| Nicaragua                       | 1968-2001                       | Standard Demographic and Health Survey | CBH    |
| Panama                          | 1965-2009                       | Census                                 | SBH    |
| Panama                          | 1972-2008                       | Living Standards Measurement Study     | SBH    |
| Venezuela                       | 1950-1967, 1969-1994, 1996-2017 | Vital Registration                     | VR/SRS |
| Brazil                          | 2019-2021                       | Vital Registration                     | VR/SRS |
| Brazil                          | 2010-2018                       | Other Survey                           | CBH    |
| Brazil                          | 1972-1973, 1975-2015            | Other Survey                           | SBH    |
| Acre                            | 2019-2021                       | Vital Registration                     | VR/SRS |
| Acre                            | 1990-2018                       | Other Survey                           | CBH    |
| Acre                            | 1981-2015                       | Other Survey                           | SBH    |
| Alagoas                         | 2019-2021                       | Vital Registration                     | VR/SRS |
| Alagoas                         | 1990-2018                       | Other Survey                           | CBH    |
| Alagoas                         | 1973, 1976-2015                 | Other Survey                           | SBH    |
| Amapá                           | 1979-2009, 2019-2021            | Vital Registration                     | VR/SRS |
| Amapá                           | 1990-2018                       | Other Survey                           | CBH    |
| Amapá                           | 1981-2015                       | Other Survey                           | SBH    |
| Amazonas                        | 2019-2021                       | Vital Registration                     | VR/SRS |
| Amazonas                        | 1990-2018                       | Other Survey                           | CBH    |
| Amazonas                        | 1981-2015                       | Other Survey                           | SBH    |
| Bahia                           | 2019-2021                       | Vital Registration                     | VR/SRS |
| Bahia                           | 1990-2018                       | Other Survey                           | CBH    |
| Bahia                           | 1973-2015                       | Other Survey                           | SBH    |
| Ceará                           | 2019-2021                       | Vital Registration                     | VR/SRS |
| Ceará                           | 1990-2018                       | Other Survey                           | CBH    |
| Ceará                           | 1973-1974, 1976-2015            | Other Survey                           | SBH    |
| Distrito Federal                | 1979-2009, 2019-2021            | Vital Registration                     | VR/SRS |
| Distrito Federal                | 1990-2018                       | Other Survey                           | CBH    |
| Distrito Federal                | 1972-2015                       | Other Survey                           | SBH    |
| Espírito Santo                  | 1979-1999, 2019-2021            | Vital Registration                     | VR/SRS |
| Espírito Santo                  | 1990-2018                       | Other Survey                           | CBH    |
| Espírito Santo                  | 1971-1972, 1975-2015            | Other Survey                           | SBH    |
| Goiás                           | 2019-2021                       | Vital Registration                     | VR/SRS |

|                     |                                                                                               |                                        |        |
|---------------------|-----------------------------------------------------------------------------------------------|----------------------------------------|--------|
| Goiás               | 1990-2018                                                                                     | Other Survey                           | CBH    |
| Goiás               | 1991-2015                                                                                     | Other Survey                           | SBH    |
| Maranhão            | 2019-2021                                                                                     | Vital Registration                     | VR/SRS |
| Maranhão            | 1990-2018                                                                                     | Other Survey                           | CBH    |
| Maranhão            | 1973, 1975-2015                                                                               | Other Survey                           | SBH    |
| Mato Grosso         | 2019-2021                                                                                     | Vital Registration                     | VR/SRS |
| Mato Grosso         | 1990-2018                                                                                     | Other Survey                           | CBH    |
| Mato Grosso         | 1972, 1974-2015                                                                               | Other Survey                           | SBH    |
| Mato Grosso do Sul  | 1979-2009, 2019-2021                                                                          | Vital Registration                     | VR/SRS |
| Mato Grosso do Sul  | 1990-2018                                                                                     | Other Survey                           | CBH    |
| Mato Grosso do Sul  | 1972-1973, 1975-2015                                                                          | Other Survey                           | SBH    |
| Minas Gerais        | 2019-2021                                                                                     | Vital Registration                     | VR/SRS |
| Minas Gerais        | 1990-2018                                                                                     | Other Survey                           | CBH    |
| Minas Gerais        | 1972-1973, 1975-1976, 1978-2015                                                               | Other Survey                           | SBH    |
| Pará                | 2019-2021                                                                                     | Vital Registration                     | VR/SRS |
| Pará                | 1990-2018                                                                                     | Other Survey                           | CBH    |
| Pará                | 1981-2015                                                                                     | Other Survey                           | SBH    |
| Paraíba             | 2019-2021                                                                                     | Vital Registration                     | VR/SRS |
| Paraíba             | 1990-2018                                                                                     | Other Survey                           | CBH    |
| Paraíba             | 1973-1974, 1976-2015                                                                          | Other Survey                           | SBH    |
| Paraná              | 1979-2009, 2019-2021                                                                          | Vital Registration                     | VR/SRS |
| Paraná              | 1990-2018                                                                                     | Other Survey                           | CBH    |
| Paraná              | 1972-1973, 1975-2015                                                                          | Other Survey                           | SBH    |
| Pernambuco          | 2019-2021                                                                                     | Vital Registration                     | VR/SRS |
| Pernambuco          | 1990-2018                                                                                     | Other Survey                           | CBH    |
| Pernambuco          | 1973, 1976-1977, 1979-2015                                                                    | Other Survey                           | SBH    |
| Piauí               | 2019-2021                                                                                     | Vital Registration                     | VR/SRS |
| Piauí               | 1950-1991, 1994, 1997                                                                         | Census                                 | SBH    |
| Piauí               | 1990-2018                                                                                     | Other Survey                           | CBH    |
| Piauí               | 1973-1975, 1977-2015                                                                          | Other Survey                           | SBH    |
| Rio de Janeiro      | 1979-2009, 2019-2021                                                                          | Vital Registration                     | VR/SRS |
| Rio de Janeiro      | 1990-2018                                                                                     | Other Survey                           | CBH    |
| Rio de Janeiro      | 1971-1972, 1974-2015                                                                          | Other Survey                           | SBH    |
| Rio Grande do Norte | 2019-2021                                                                                     | Vital Registration                     | VR/SRS |
| Rio Grande do Norte | 1990-2018                                                                                     | Other Survey                           | CBH    |
| Rio Grande do Norte | 1972, 1974, 1976-2015                                                                         | Other Survey                           | SBH    |
| Rio Grande do Sul   | 1979-2009, 2019-2021                                                                          | Vital Registration                     | VR/SRS |
| Rio Grande do Sul   | 1990-2018                                                                                     | Other Survey                           | CBH    |
| Rio Grande do Sul   | 1971-1972, 1974-2015                                                                          | Other Survey                           | SBH    |
| Rondônia            | 2019-2021                                                                                     | Vital Registration                     | VR/SRS |
| Rondônia            | 1990-2018                                                                                     | Other Survey                           | CBH    |
| Rondônia            | 1981-2015                                                                                     | Other Survey                           | SBH    |
| Roraima             | 2019-2021                                                                                     | Vital Registration                     | VR/SRS |
| Roraima             | 1990-2018                                                                                     | Other Survey                           | CBH    |
| Roraima             | 1981-2015                                                                                     | Other Survey                           | SBH    |
| Santa Catarina      | 1979-2009, 2019-2021                                                                          | Vital Registration                     | VR/SRS |
| Santa Catarina      | 1990-2018                                                                                     | Other Survey                           | CBH    |
| Santa Catarina      | 1972-1973, 1975-2015                                                                          | Other Survey                           | SBH    |
| São Paulo           | 1979-2009, 2019-2021                                                                          | Vital Registration                     | VR/SRS |
| São Paulo           | 1990-2018                                                                                     | Other Survey                           | CBH    |
| São Paulo           | 1971-1972, 1974-2015                                                                          | Other Survey                           | SBH    |
| Sergipe             | 2019-2021                                                                                     | Vital Registration                     | VR/SRS |
| Sergipe             | 1990-2018                                                                                     | Other Survey                           | CBH    |
| Sergipe             | 1973-1974, 1976-2015                                                                          | Other Survey                           | SBH    |
| Tocantins           | 2019-2021                                                                                     | Vital Registration                     | VR/SRS |
| Tocantins           | 1990-2018                                                                                     | Other Survey                           | CBH    |
| Tocantins           | 1981-2015                                                                                     | Other Survey                           | SBH    |
| Paraguay            | 1965-1990                                                                                     | Standard Demographic and Health Survey | CBH    |
| Paraguay            | 1970-2008                                                                                     | Reproductive Health Survey             | CBH    |
| Paraguay            | 1989-2016                                                                                     | Multiple Indicator Cluster Survey      | CBH    |
| Afghanistan         | 1984-2015                                                                                     | Standard Demographic and Health Survey | CBH    |
| Afghanistan         | 1991-2015                                                                                     | Standard Demographic and Health Survey | SBH    |
| Afghanistan         | 1983, 1986-2010                                                                               | Multiple Indicator Cluster Survey      | SBH    |
| Afghanistan         | 1982-2006, 2009                                                                               | Other Survey                           | SBH    |
| Algeria             | 1980-1982, 1985-1986, 1990, 1998, 2000, 2007-2011, 2014-2016                                  | Vital Registration                     | VR/SRS |
| Algeria             | 1975-2002                                                                                     | Pan Arab Project for Family Health     | CBH    |
| Algeria             | 1961-1992                                                                                     | Pan Arab Project for Child Development | CBH    |
| Bahrain             | 1980-1982, 1984-2012, 2014-2019                                                               | Vital Registration                     | VR/SRS |
| Bahrain             | 1952, 1956, 1959, 1962, 1965, 1967, 1973, 1975, 1979, 1982, 1985, 1987-1988, 1992, 1995, 1998 | Census                                 | SBH    |

|                             |                 |                                        |        |
|-----------------------------|-----------------|----------------------------------------|--------|
| Egypt                       | 1959-2013       | Standard Demographic and Health Survey | CBH    |
| Iran                        | 2015-2016, 2020 | Vital Registration                     | VR/SRS |
| Iran                        | 2005, 2007      | Standard Demographic and Health Survey | CBH    |
| Iran                        | 1967-2000       | Other Survey                           | CBH    |
| Iran                        | 1975-1999       | Other Survey                           | SBH    |
| Alborz                      | 2015-2016       | Vital Registration                     | VR/SRS |
| Alborz                      | 1975-2000       | Standard Demographic and Health Survey | CBH    |
| Ardebil                     | 2015-2016       | Vital Registration                     | VR/SRS |
| Ardebil                     | 1975-2000       | Standard Demographic and Health Survey | CBH    |
| Bushehr                     | 2015-2016       | Vital Registration                     | VR/SRS |
| Bushehr                     | 1975-2000       | Standard Demographic and Health Survey | CBH    |
| Chahar Mahaal and Bakhtiari | 2015-2016       | Vital Registration                     | VR/SRS |
| Chahar Mahaal and Bakhtiari | 1975-2000       | Standard Demographic and Health Survey | CBH    |
| East Azarbayegan            | 2015-2016       | Vital Registration                     | VR/SRS |
| East Azarbayegan            | 1975-2000       | Standard Demographic and Health Survey | CBH    |
| Fars                        | 2015-2016       | Vital Registration                     | VR/SRS |
| Fars                        | 1975-2000       | Standard Demographic and Health Survey | CBH    |
| Gilan                       | 2015-2016       | Vital Registration                     | VR/SRS |
| Gilan                       | 1975-2000       | Standard Demographic and Health Survey | CBH    |
| Golestan                    | 2015-2016       | Vital Registration                     | VR/SRS |
| Golestan                    | 1975-2000       | Standard Demographic and Health Survey | CBH    |
| Hamadan                     | 2015-2016       | Vital Registration                     | VR/SRS |
| Hamadan                     | 1973-2000       | Standard Demographic and Health Survey | CBH    |
| Hormozgan                   | 2015-2016       | Vital Registration                     | VR/SRS |
| Hormozgan                   | 1975-2000       | Standard Demographic and Health Survey | CBH    |
| Ilam                        | 2015-2016       | Vital Registration                     | VR/SRS |
| Ilam                        | 1973-2000       | Standard Demographic and Health Survey | CBH    |
| Isfahan                     | 2015-2016       | Vital Registration                     | VR/SRS |
| Isfahan                     | 1975-2000       | Standard Demographic and Health Survey | CBH    |
| Kerman                      | 2015-2016       | Vital Registration                     | VR/SRS |
| Kerman                      | 1975-2000       | Standard Demographic and Health Survey | CBH    |
| Kermanshah                  | 2015-2016       | Vital Registration                     | VR/SRS |
| Kermanshah                  | 1975-2000       | Standard Demographic and Health Survey | CBH    |
| Khorasan-e-Razavi           | 2015-2016       | Vital Registration                     | VR/SRS |
| Khorasan-e-Razavi           | 1975-2000       | Standard Demographic and Health Survey | CBH    |
| Khuzestan                   | 2015-2016       | Vital Registration                     | VR/SRS |
| Khuzestan                   | 1973-2000       | Standard Demographic and Health Survey | CBH    |
| Kohgiluyeh and Boyer-Ahmad  | 2015-2016       | Vital Registration                     | VR/SRS |
| Kohgiluyeh and Boyer-Ahmad  | 1975-2000       | Standard Demographic and Health Survey | CBH    |
| Kurdistan                   | 2015-2016       | Vital Registration                     | VR/SRS |
| Kurdistan                   | 1975-2000       | Standard Demographic and Health Survey | CBH    |
| Loresstan                   | 2015-2016       | Vital Registration                     | VR/SRS |
| Loresstan                   | 1973-2000       | Standard Demographic and Health Survey | CBH    |
| Markazi                     | 2015-2016       | Vital Registration                     | VR/SRS |
| Markazi                     | 1975-2000       | Standard Demographic and Health Survey | CBH    |
| Mazandaran                  | 2015-2016       | Vital Registration                     | VR/SRS |
| Mazandaran                  | 1975-2000       | Standard Demographic and Health Survey | CBH    |
| North Khorasan              | 2015-2016       | Vital Registration                     | VR/SRS |
| North Khorasan              | 1975-2000       | Standard Demographic and Health Survey | CBH    |
| Qazvin                      | 2015-2016       | Vital Registration                     | VR/SRS |
| Qazvin                      | 1975-2000       | Standard Demographic and Health Survey | CBH    |
| Qom                         | 2015-2016       | Vital Registration                     | VR/SRS |
| Qom                         | 1975-2000       | Standard Demographic and Health Survey | CBH    |
| Semnan                      | 2015-2016       | Vital Registration                     | VR/SRS |
| Semnan                      | 1977-2000       | Standard Demographic and Health Survey | CBH    |
| Sistan and Baluchistan      | 2015-2016       | Vital Registration                     | VR/SRS |
| Sistan and Baluchistan      | 1975-2000       | Standard Demographic and Health Survey | CBH    |
| South Khorasan              | 2015-2016       | Vital Registration                     | VR/SRS |
| South Khorasan              | 1975-2000       | Standard Demographic and Health Survey | CBH    |
| Tehran                      | 2015-2016       | Vital Registration                     | VR/SRS |
| Tehran                      | 1981-2000       | Standard Demographic and Health Survey | CBH    |
| West Azarbayegan            | 2015-2016       | Vital Registration                     | VR/SRS |
| West Azarbayegan            | 1975-2000       | Standard Demographic and Health Survey | CBH    |
| Yazd                        | 2015-2016       | Vital Registration                     | VR/SRS |
| Yazd                        | 1975-2000       | Standard Demographic and Health Survey | CBH    |
| Zanjan                      | 2015-2016       | Vital Registration                     | VR/SRS |
| Zanjan                      | 1975-2000       | Standard Demographic and Health Survey | CBH    |
| Iraq                        | 1976-2017       | Multiple Indicator Cluster Survey      | CBH    |
| Iraq                        | 1981-2010       | Multiple Indicator Cluster Survey      | SBH    |

|                                |                                                                                            |                                        |        |
|--------------------------------|--------------------------------------------------------------------------------------------|----------------------------------------|--------|
| Jordan                         | 1963-1966, 1968-2017                                                                       | Standard Demographic and Health Survey | CBH    |
| Kuwait                         | 1962-1989, 1991-2020                                                                       | Vital Registration                     | VR/SRS |
| Lebanon                        | 1979-2004                                                                                  | Pan Arab Project for Family Health     | CBH    |
| Lebanon                        | 1979-2003                                                                                  | Pan Arab Project for Family Health     | SBH    |
| Lebanon                        | 1966-1995                                                                                  | Pan Arab Project for Child Development | CBH    |
| Lebanon                        | 1971-1995                                                                                  | Pan Arab Project for Child Development | SBH    |
| Lebanon                        | 1998, 2009                                                                                 | Multiple Indicator Cluster Survey      | SBH    |
| Libya                          | 1972-1976, 1981, 1996, 2000, 2002, 2006-2011, 2016-2017                                    | Vital Registration                     | VR/SRS |
| Libya                          | 1983-2007                                                                                  | Pan Arab Project for Family Health     | SBH    |
| Libya                          | 1964-1995                                                                                  | Pan Arab Project for Child Development | CBH    |
| Libya                          | 1970-1994                                                                                  | Pan Arab Project for Child Development | SBH    |
| Libya                          | 2003                                                                                       | Multiple Indicator Cluster Survey      | SBH    |
| Morocco                        | 1958-2003                                                                                  | Standard Demographic and Health Survey | CBH    |
| Oman                           | 2004-2014, 2016-2020                                                                       | Vital Registration                     | VR/SRS |
| Palestine                      | 1973-1998, 2001, 2003                                                                      | Census                                 | SBH    |
| Palestine                      | 1992                                                                                       | Other Demographic and Health Survey    | CBH    |
| Palestine                      | 1980-2004                                                                                  | Other Demographic and Health Survey    | SBH    |
| Palestine                      | 2004                                                                                       | Pan Arab Project for Family Health     | CBH    |
| Palestine                      | 1982-2006                                                                                  | Pan Arab Project for Family Health     | SBH    |
| Palestine                      | 1977-2013, 2018                                                                            | Multiple Indicator Cluster Survey      | CBH    |
| Palestine                      | 1975-2013                                                                                  | Multiple Indicator Cluster Survey      | SBH    |
| Palestine                      | 1970-2003                                                                                  | Other Survey                           | CBH    |
| Qatar                          | 1981-2020                                                                                  | Vital Registration                     | VR/SRS |
| Qatar                          | 1979, 1984, 1989, 1994                                                                     | Pan Arab Project for Family Health     | CBH    |
| Qatar                          | 1970, 1975, 1980, 1985                                                                     | Pan Arab Project for Child Development | CBH    |
| Qatar                          | 1973, 1975, 1980, 1985                                                                     | Pan Arab Project for Child Development | SBH    |
| Saudi Arabia                   | 2011-2012                                                                                  | Vital Registration                     | VR/SRS |
| Sudan                          | 1982-2014                                                                                  | Multiple Indicator Cluster Survey      | CBH    |
| Syria                          | 2000-2010                                                                                  | Vital Registration                     | VR/SRS |
| Syria                          | 1953, 1956, 1959, 1961, 1964, 1966, 1976, 1980, 1983, 1985, 1988, 1990                     | Census                                 | SBH    |
| Tunisia                        | 1963-1988                                                                                  | Standard Demographic and Health Survey | CBH    |
| Türkiye                        | 1966-2008                                                                                  | Standard Demographic and Health Survey | CBH    |
| United Arab Emirates           | 1995-1999, 2001-2003, 2005-2008, 2017-2020                                                 | Vital Registration                     | VR/SRS |
| United Arab Emirates           | 1956, 1959, 1963, 1966, 1969, 1971                                                         | Census                                 | SBH    |
| Yemen                          | 1962-2013                                                                                  | Standard Demographic and Health Survey | CBH    |
| Yemen                          | 1973-2002                                                                                  | Pan Arab Project for Family Health     | CBH    |
| Bangladesh                     | 1964-1970, 1972-1973, 1975-2014, 2016                                                      | Standard Demographic and Health Survey | CBH    |
| Bangladesh                     | 1951-1970, 1972-1973, 1975                                                                 | World Fertility Survey                 | SBH    |
| Bhutan                         | 1980-2017                                                                                  | Census                                 | SBH    |
| Bhutan                         | 1985-2009                                                                                  | Multiple Indicator Cluster Survey      | SBH    |
| Bhutan                         | 1992-1993                                                                                  | Other Survey                           | CBH    |
| Bhutan                         | 1989-2013                                                                                  | Other Survey                           | SBH    |
| India                          | 1988-2020                                                                                  | Sample Registrations System            | VR/SRS |
| India                          | 1960-2014                                                                                  | Standard Demographic and Health Survey | CBH    |
| Nepal                          | 1968-2015                                                                                  | Standard Demographic and Health Survey | CBH    |
| Pakistan                       | 1969-2012, 2015                                                                            | Standard Demographic and Health Survey | CBH    |
| Azad Jammu & Kashmir           | 1977-2001                                                                                  | Other Survey                           | SBH    |
| Balochistan                    | 1975-2012                                                                                  | Standard Demographic and Health Survey | CBH    |
| Gilgit-Baltistan               | 1993-2012                                                                                  | Standard Demographic and Health Survey | CBH    |
| Islamabad Capital Territory    | 1995-2012                                                                                  | Standard Demographic and Health Survey | CBH    |
| Khyber Pakhtunkhwa             | 1971-2012                                                                                  | Standard Demographic and Health Survey | CBH    |
| Khyber Pakhtunkhwa             | 2017                                                                                       | Multiple Indicator Cluster Survey      | CBH    |
| Punjab                         | 1969-2012                                                                                  | Standard Demographic and Health Survey | CBH    |
| Sindh                          | 1969-2012                                                                                  | Standard Demographic and Health Survey | CBH    |
| North Korea                    | 2005, 2010, 2015                                                                           | Multiple Indicator Cluster Survey      | CBH    |
| Taiwan (province of China)     | 1955-2021                                                                                  | Vital Registration                     | VR/SRS |
| American Samoa                 | 1952-1956, 1958-1973, 1976, 1982, 1984-1993, 1997-2017, 2020                               | Vital Registration                     | VR/SRS |
| Cook Islands                   | 1951-1960, 1965, 1968, 1971-1973, 1975-1977, 1979-1988, 2000-2016                          | Vital Registration                     | VR/SRS |
| Fiji                           | 1967, 1970, 1974, 1976-1977, 1980, 1982-1983, 1987-1988, 1990-1992, 1995, 1998, 2001, 2004 | Census                                 | SBH    |
| Guam                           | 1950-1992, 1994-2020                                                                       | Vital Registration                     | VR/SRS |
| Kiribati                       | 1987, 1989-1990, 1992, 1994-1995, 1997-1998, 2000-2002, 2004                               | Census                                 | SBH    |
| Kiribati                       | 2007, 2012, 2017                                                                           | Multiple Indicator Cluster Survey      | CBH    |
| Kiribati                       | 1996, 2001, 2006                                                                           | Other Survey                           | CBH    |
| Kiribati                       | 1991, 1994, 1997, 2001, 2004, 2006                                                         | Other Survey                           | SBH    |
| Marshall Islands               | 1986-1997, 2005-2006                                                                       | Vital Registration                     | VR/SRS |
| Marshall Islands               | 1981, 1984, 1987, 1990-1992, 1995, 1999, 2002, 2005, 2008                                  | Census                                 | SBH    |
| Marshall Islands               | 1995, 2000, 2005                                                                           | Standard Demographic and Health Survey | CBH    |
| Federated States of Micronesia | 2003                                                                                       | Vital Registration                     | VR/SRS |
| Federated States of Micronesia | 1982, 1985, 1988, 1991, 1994, 1996                                                         | Census                                 | SBH    |

|                          |                                                                                                                     |                                        |        |
|--------------------------|---------------------------------------------------------------------------------------------------------------------|----------------------------------------|--------|
| Nauru                    | 1965-1968, 1978, 1992-2002, 2011                                                                                    | Vital Registration                     | VR/SRS |
| Niue                     | 1950-1961, 1966-1969, 1973, 1975, 1989-1991, 1993, 1995, 1997, 1999-2001, 2003-2004, 2006, 2008, 2011               | Vital Registration                     | VR/SRS |
| Northern Mariana Islands | 1998-2020                                                                                                           | Vital Registration                     | VR/SRS |
| Palau                    | 1999, 2003, 2005, 2013, 2017-2018                                                                                   | Vital Registration                     | VR/SRS |
| Papua New Guinea         | 1952, 1956, 1959, 1962-1963, 1965-1968, 1970-1971, 1974, 1976-1977, 1979, 1981, 1984, 1988, 1990, 1993, 1996, 1998  | Census                                 | SBH    |
| Papua New Guinea         | 1979-2006, 2011, 2016                                                                                               | Standard Demographic and Health Survey | CBH    |
| Papua New Guinea         | 1988, 1991, 1995, 1998, 2001, 2003, 2005                                                                            | Standard Demographic and Health Survey | SBH    |
| Papua New Guinea         | 1974, 1979, 1984, 1989, 1994                                                                                        | Other Demographic and Health Survey    | CBH    |
| Papua New Guinea         | 1972, 1976, 1979, 1982, 1985, 1987-1988, 1993                                                                       | Other Demographic and Health Survey    | SBH    |
| Samoa                    | 1950, 1952-1953, 1955-1958, 1960, 1962, 1965, 1968, 1970, 1972                                                      | Census                                 | SBH    |
| Samoa                    | 2002, 2007, 2012                                                                                                    | Standard Demographic and Health Survey | CBH    |
| Solomon Islands          | 1952, 1955, 1958-1959, 1961, 1964, 1966-1967, 1969, 1972, 1981, 1984, 1987, 1990, 1993-1995, 1997, 2000, 2003, 2005 | Census                                 | SBH    |
| Solomon Islands          | 1995, 2000, 2003, 2005, 2008, 2013                                                                                  | Standard Demographic and Health Survey | CBH    |
| Tokelau                  | 1955, 1971-1974, 1976, 1978-1979, 1982                                                                              | Vital Registration                     | VR/SRS |
| Tonga                    | 2006                                                                                                                | Census                                 | CBH    |
| Tonga                    | 1958, 1961, 1964, 1967-1968, 1970-1971, 1973-1974, 1977, 1980, 1982                                                 | Census                                 | SBH    |
| Tonga                    | 2000, 2005, 2010                                                                                                    | Other Demographic and Health Survey    | CBH    |
| Tonga                    | 1992, 1996, 2000, 2003, 2006, 2008                                                                                  | Other Demographic and Health Survey    | SBH    |
| Tonga                    | 2004, 2014                                                                                                          | Multiple Indicator Cluster Survey      | CBH    |
| Tuvalu                   | 1992-2002, 2005, 2016                                                                                               | Vital Registration                     | VR/SRS |
| Vanuatu                  | 2014                                                                                                                | Vital Registration                     | VR/SRS |
| Vanuatu                  | 1952, 1956, 1959, 1961, 1963, 1991, 1994, 1998, 2001, 2003, 2006                                                    | Census                                 | SBH    |
| Vanuatu                  | 2001, 2006, 2011                                                                                                    | Other Demographic and Health Survey    | CBH    |
| Vanuatu                  | 1994, 1997, 2001, 2004, 2006, 2009                                                                                  | Other Demographic and Health Survey    | SBH    |
| Vanuatu                  | 1985-2006                                                                                                           | Multiple Indicator Cluster Survey      | SBH    |
| Cambodia                 | 1972-1974, 1981-2014                                                                                                | Standard Demographic and Health Survey | CBH    |
| Indonesia                | 1958-2017                                                                                                           | Standard Demographic and Health Survey | CBH    |
| Aceh                     | 1972-2017                                                                                                           | Standard Demographic and Health Survey | CBH    |
| Bali                     | 1966-2015                                                                                                           | Standard Demographic and Health Survey | CBH    |
| Bangka-Belitung Islands  | 1978-2017                                                                                                           | Standard Demographic and Health Survey | CBH    |
| Banten                   | 1972-2017                                                                                                           | Standard Demographic and Health Survey | CBH    |
| Bengkulu                 | 1971-2015                                                                                                           | Standard Demographic and Health Survey | CBH    |
| Gorontalo                | 1976-2017                                                                                                           | Standard Demographic and Health Survey | CBH    |
| Jakarta                  | 1962-2017                                                                                                           | Standard Demographic and Health Survey | CBH    |
| Jambi                    | 1972-2017                                                                                                           | Standard Demographic and Health Survey | CBH    |
| West Java                | 1964-2017                                                                                                           | Standard Demographic and Health Survey | CBH    |
| Central Java             | 1964-2017                                                                                                           | Standard Demographic and Health Survey | CBH    |
| East Java                | 1962-2017                                                                                                           | Standard Demographic and Health Survey | CBH    |
| West Kalimantan          | 1968-2017                                                                                                           | Standard Demographic and Health Survey | CBH    |
| South Kalimantan         | 1966-2017                                                                                                           | Standard Demographic and Health Survey | CBH    |
| Central Kalimantan       | 1972-2017                                                                                                           | Standard Demographic and Health Survey | CBH    |
| East Kalimantan          | 1972-2017                                                                                                           | Standard Demographic and Health Survey | CBH    |
| North Kalimantan         | 1988-2017                                                                                                           | Standard Demographic and Health Survey | CBH    |
| Riau Islands             | 1981-2017                                                                                                           | Standard Demographic and Health Survey | CBH    |
| Lampung                  | 1968-2017                                                                                                           | Standard Demographic and Health Survey | CBH    |
| Maluku                   | 1991-2017                                                                                                           | Standard Demographic and Health Survey | CBH    |
| North Maluku             | 1990-2017                                                                                                           | Standard Demographic and Health Survey | CBH    |
| West Nusa Tenggara       | 1968-2017                                                                                                           | Standard Demographic and Health Survey | CBH    |
| East Nusa Tenggara       | 1972-2017                                                                                                           | Standard Demographic and Health Survey | CBH    |
| Papua                    | 1992-2011                                                                                                           | Standard Demographic and Health Survey | CBH    |
| West Papua               | 1990-2012                                                                                                           | Standard Demographic and Health Survey | CBH    |
| Riau                     | 1968-2017                                                                                                           | Standard Demographic and Health Survey | CBH    |
| West Sulawesi            | 1982-2017                                                                                                           | Standard Demographic and Health Survey | CBH    |
| South Sulawesi           | 1966-2017                                                                                                           | Standard Demographic and Health Survey | CBH    |
| Central Sulawesi         | 1970-2017                                                                                                           | Standard Demographic and Health Survey | CBH    |
| Southeast Sulawesi       | 1970-2017                                                                                                           | Standard Demographic and Health Survey | CBH    |
| North Sulawesi           | 1972-2017                                                                                                           | Standard Demographic and Health Survey | CBH    |
| West Sumatra             | 1968-2017                                                                                                           | Standard Demographic and Health Survey | CBH    |
| South Sumatra            | 1966-2015                                                                                                           | Standard Demographic and Health Survey | CBH    |
| North Sumatra            | 1966-2017                                                                                                           | Standard Demographic and Health Survey | CBH    |
| Yogyakarta               | 1950-2009                                                                                                           | Census                                 | SBH    |
| Yogyakarta               | 1964-2017                                                                                                           | Standard Demographic and Health Survey | CBH    |
| Laos                     | 1982-2017                                                                                                           | Multiple Indicator Cluster Survey      | CBH    |
| Malaysia                 | 1952-1972, 1976-1978, 1984-1986, 1990-2017, 2019-2020                                                               | Vital Registration                     | VR/SRS |
| Maldives                 | 1980-2017                                                                                                           | Standard Demographic and Health Survey | CBH    |
| Mauritius                | 1950-2020                                                                                                           | Vital Registration                     | VR/SRS |
| Myanmar                  | 1988-2015                                                                                                           | Standard Demographic and Health Survey | CBH    |
| Philippines              | 1965-2017                                                                                                           | Standard Demographic and Health Survey | CBH    |
| Abra                     | 1986-2010                                                                                                           | Census                                 | SBH    |

|                           |           |                                        |     |
|---------------------------|-----------|----------------------------------------|-----|
| Abra                      | 1987-2011 | Standard Demographic and Health Survey | SBH |
| Agusan Del Norte          | 1986-2010 | Census                                 | SBH |
| Agusan Del Norte          | 1987-2011 | Standard Demographic and Health Survey | SBH |
| Agusan Del Sur            | 1986-2010 | Census                                 | SBH |
| Agusan Del Sur            | 1987-2011 | Standard Demographic and Health Survey | SBH |
| Aklan                     | 1986-2010 | Census                                 | SBH |
| Aklan                     | 1987-2011 | Standard Demographic and Health Survey | SBH |
| Albay                     | 1986-2010 | Census                                 | SBH |
| Albay                     | 1987-2011 | Standard Demographic and Health Survey | SBH |
| Antique                   | 1986-2010 | Census                                 | SBH |
| Antique                   | 1987-2011 | Standard Demographic and Health Survey | SBH |
| Apayao                    | 1986-2010 | Census                                 | SBH |
| Apayao                    | 1987-2011 | Standard Demographic and Health Survey | SBH |
| Aurora                    | 1986-2010 | Census                                 | SBH |
| Aurora                    | 1987-2011 | Standard Demographic and Health Survey | SBH |
| Basilan                   | 1986-2010 | Census                                 | SBH |
| Basilan                   | 1987-2011 | Standard Demographic and Health Survey | SBH |
| Bataan                    | 1986-2010 | Census                                 | SBH |
| Bataan                    | 1987-2011 | Standard Demographic and Health Survey | SBH |
| Batanes                   | 1986-2010 | Census                                 | SBH |
| Batanes                   | 1987-2011 | Standard Demographic and Health Survey | SBH |
| Batangas                  | 1986-2010 | Census                                 | SBH |
| Batangas                  | 1987-2011 | Standard Demographic and Health Survey | SBH |
| Benguet                   | 1986-2010 | Census                                 | SBH |
| Benguet                   | 1987-2011 | Standard Demographic and Health Survey | SBH |
| Biliran                   | 1986-2010 | Census                                 | SBH |
| Biliran                   | 1987-2011 | Standard Demographic and Health Survey | SBH |
| Bohol                     | 1986-2010 | Census                                 | SBH |
| Bohol                     | 1987-2011 | Standard Demographic and Health Survey | SBH |
| Bukidnon                  | 1986-2010 | Census                                 | SBH |
| Bukidnon                  | 1987-2011 | Standard Demographic and Health Survey | SBH |
| Bulacan                   | 1986-2010 | Census                                 | SBH |
| Bulacan                   | 1987-2011 | Standard Demographic and Health Survey | SBH |
| Cagayan                   | 1986-2010 | Census                                 | SBH |
| Cagayan                   | 1987-2011 | Standard Demographic and Health Survey | SBH |
| Camarines Norte           | 1986-2010 | Census                                 | SBH |
| Camarines Norte           | 1987-2011 | Standard Demographic and Health Survey | SBH |
| Camarines Sur             | 1986-2010 | Census                                 | SBH |
| Camarines Sur             | 1987-2011 | Standard Demographic and Health Survey | SBH |
| Camiguin                  | 1986-2010 | Census                                 | SBH |
| Camiguin                  | 1987-2011 | Standard Demographic and Health Survey | SBH |
| Capiz                     | 1986-2010 | Census                                 | SBH |
| Capiz                     | 1987-2011 | Standard Demographic and Health Survey | SBH |
| Catanduanes               | 1986-2010 | Census                                 | SBH |
| Catanduanes               | 1987-2011 | Standard Demographic and Health Survey | SBH |
| Cavite                    | 1986-2010 | Census                                 | SBH |
| Cavite                    | 1987-2011 | Standard Demographic and Health Survey | SBH |
| Cebu                      | 1986-2010 | Census                                 | SBH |
| Cebu                      | 1987-2011 | Standard Demographic and Health Survey | SBH |
| Cotabato (North Cotabato) | 1986-2010 | Census                                 | SBH |
| Cotabato (North Cotabato) | 1987-2011 | Standard Demographic and Health Survey | SBH |
| Davao de Oro              | 1986-2010 | Census                                 | SBH |
| Davao de Oro              | 1987-2011 | Standard Demographic and Health Survey | SBH |
| Davao Del Norte           | 1986-2010 | Census                                 | SBH |
| Davao Del Norte           | 1987-2011 | Standard Demographic and Health Survey | SBH |
| Davao Del Sur             | 1986-2010 | Census                                 | SBH |
| Davao Del Sur             | 1987-2011 | Standard Demographic and Health Survey | SBH |
| Davao Occidental          | 1986-2010 | Census                                 | SBH |
| Davao Occidental          | 1987-2011 | Standard Demographic and Health Survey | SBH |
| Davao Oriental            | 1986-2010 | Census                                 | SBH |
| Davao Oriental            | 1987-2011 | Standard Demographic and Health Survey | SBH |
| Dinagat Islands           | 1986-2010 | Census                                 | SBH |
| Eastern Samar             | 1986-2010 | Census                                 | SBH |
| Eastern Samar             | 1987-2011 | Standard Demographic and Health Survey | SBH |
| Guimaras                  | 1986-2010 | Census                                 | SBH |
| Guimaras                  | 1987-2011 | Standard Demographic and Health Survey | SBH |
| Ifugao                    | 1986-2010 | Census                                 | SBH |
| Ifugao                    | 1987-2011 | Standard Demographic and Health Survey | SBH |
| Ilocos Norte              | 1986-2010 | Census                                 | SBH |



|                         |           |                                        |     |
|-------------------------|-----------|----------------------------------------|-----|
| Ilocos Norte            | 1987-2011 | Standard Demographic and Health Survey | SBH |
| Ilocos Sur              | 1986-2010 | Census                                 | SBH |
| Ilocos Sur              | 1987-2011 | Standard Demographic and Health Survey | SBH |
| Iloilo                  | 1986-2010 | Census                                 | SBH |
| Iloilo                  | 1987-2011 | Standard Demographic and Health Survey | SBH |
| Isabela                 | 1986-2010 | Census                                 | SBH |
| Isabela                 | 1987-2011 | Standard Demographic and Health Survey | SBH |
| Kalinga                 | 1986-2010 | Census                                 | SBH |
| Kalinga                 | 1987-2011 | Standard Demographic and Health Survey | SBH |
| La Union                | 1986-2010 | Census                                 | SBH |
| La Union                | 1987-2011 | Standard Demographic and Health Survey | SBH |
| Laguna                  | 1986-2010 | Census                                 | SBH |
| Laguna                  | 1987-2011 | Standard Demographic and Health Survey | SBH |
| Lanao Del Norte         | 1986-2010 | Census                                 | SBH |
| Lanao Del Norte         | 1987-2011 | Standard Demographic and Health Survey | SBH |
| Lanao Del Sur           | 1986-2010 | Census                                 | SBH |
| Lanao Del Sur           | 1987-2011 | Standard Demographic and Health Survey | SBH |
| Leyte                   | 1986-2010 | Census                                 | SBH |
| Leyte                   | 1987-2011 | Standard Demographic and Health Survey | SBH |
| Maguindanao             | 1986-2010 | Census                                 | SBH |
| Maguindanao             | 1987-2011 | Standard Demographic and Health Survey | SBH |
| Marinduque              | 1986-2010 | Census                                 | SBH |
| Marinduque              | 1987-2011 | Standard Demographic and Health Survey | SBH |
| Masbate                 | 1986-2010 | Census                                 | SBH |
| Masbate                 | 1987-2011 | Standard Demographic and Health Survey | SBH |
| Misamis Occidental      | 1986-2010 | Census                                 | SBH |
| Misamis Occidental      | 1987-2011 | Standard Demographic and Health Survey | SBH |
| Misamis Oriental        | 1986-2010 | Census                                 | SBH |
| Misamis Oriental        | 1987-2011 | Standard Demographic and Health Survey | SBH |
| Mountain Province       | 1986-2010 | Census                                 | SBH |
| Mountain Province       | 1987-2011 | Standard Demographic and Health Survey | SBH |
| National Capital Region | 1986-2010 | Census                                 | SBH |
| National Capital Region | 1987-2011 | Standard Demographic and Health Survey | SBH |
| Negros Occidental       | 1986-2010 | Census                                 | SBH |
| Negros Occidental       | 1987-2011 | Standard Demographic and Health Survey | SBH |
| Negros Oriental         | 1986-2010 | Census                                 | SBH |
| Negros Oriental         | 1987-2011 | Standard Demographic and Health Survey | SBH |
| Northern Samar          | 1986-2010 | Census                                 | SBH |
| Northern Samar          | 1987-2011 | Standard Demographic and Health Survey | SBH |
| Nueva Ecija             | 1986-2010 | Census                                 | SBH |
| Nueva Ecija             | 1987-2011 | Standard Demographic and Health Survey | SBH |
| Nueva Vizcaya           | 1986-2010 | Census                                 | SBH |
| Nueva Vizcaya           | 1987-2011 | Standard Demographic and Health Survey | SBH |
| Occidental Mindoro      | 1986-2010 | Census                                 | SBH |
| Occidental Mindoro      | 1987-2011 | Standard Demographic and Health Survey | SBH |
| Oriental Mindoro        | 1986-2010 | Census                                 | SBH |
| Oriental Mindoro        | 1987-2011 | Standard Demographic and Health Survey | SBH |
| Palawan                 | 1986-2010 | Census                                 | SBH |
| Palawan                 | 1987-2011 | Standard Demographic and Health Survey | SBH |
| Pampanga                | 1986-2010 | Census                                 | SBH |
| Pampanga                | 1987-2011 | Standard Demographic and Health Survey | SBH |
| Pangasinan              | 1986-2010 | Census                                 | SBH |
| Pangasinan              | 1987-2011 | Standard Demographic and Health Survey | SBH |
| Quezon                  | 1986-2010 | Census                                 | SBH |
| Quezon                  | 1987-2011 | Standard Demographic and Health Survey | SBH |
| Quirino                 | 1986-2010 | Census                                 | SBH |
| Quirino                 | 1987-2011 | Standard Demographic and Health Survey | SBH |
| Rizal                   | 1986-2010 | Census                                 | SBH |
| Rizal                   | 1987-2011 | Standard Demographic and Health Survey | SBH |
| Romblon                 | 1986-2010 | Census                                 | SBH |
| Romblon                 | 1987-2011 | Standard Demographic and Health Survey | SBH |
| Samar (Western Samar)   | 1986-2010 | Census                                 | SBH |
| Samar (Western Samar)   | 1987-2011 | Standard Demographic and Health Survey | SBH |
| Sarangani               | 1986-2010 | Census                                 | SBH |
| Sarangani               | 1987-2011 | Standard Demographic and Health Survey | SBH |
| Siquijor                | 1986-2010 | Census                                 | SBH |
| Siquijor                | 1987-2011 | Standard Demographic and Health Survey | SBH |
| Sorsogon                | 1986-2010 | Census                                 | SBH |
| Sorsogon                | 1987-2011 | Standard Demographic and Health Survey | SBH |

|                                              |                                                       |                                        |        |
|----------------------------------------------|-------------------------------------------------------|----------------------------------------|--------|
| South Cotabato                               | 1986-2010                                             | Census                                 | SBH    |
| South Cotabato                               | 1987-2011                                             | Standard Demographic and Health Survey | SBH    |
| Southern Leyte                               | 1986-2010                                             | Census                                 | SBH    |
| Southern Leyte                               | 1987-2011                                             | Standard Demographic and Health Survey | SBH    |
| Sultan Kudarat                               | 1986-2010                                             | Census                                 | SBH    |
| Sultan Kudarat                               | 1987-2011                                             | Standard Demographic and Health Survey | SBH    |
| Sulu                                         | 1989-2017                                             | Standard Demographic and Health Survey | CBH    |
| Surigao Del Norte                            | 1986-2010                                             | Census                                 | SBH    |
| Surigao Del Norte                            | 1987-2011                                             | Standard Demographic and Health Survey | SBH    |
| Surigao Del Sur                              | 1986-2010                                             | Census                                 | SBH    |
| Surigao Del Sur                              | 1987-2011                                             | Standard Demographic and Health Survey | SBH    |
| Tarlac                                       | 1986-2010                                             | Census                                 | SBH    |
| Tarlac                                       | 1987-2011                                             | Standard Demographic and Health Survey | SBH    |
| Tawi-Tawi                                    | 1986-2010                                             | Census                                 | SBH    |
| Tawi-Tawi                                    | 1987-2011                                             | Standard Demographic and Health Survey | SBH    |
| Zambales                                     | 1986-2010                                             | Census                                 | SBH    |
| Zambales                                     | 1987-2011                                             | Standard Demographic and Health Survey | SBH    |
| Zamboanga Del Norte                          | 1986-2010                                             | Census                                 | SBH    |
| Zamboanga Del Norte                          | 1987-2011                                             | Standard Demographic and Health Survey | SBH    |
| Zamboanga Del Sur                            | 1986-2010                                             | Census                                 | SBH    |
| Zamboanga Del Sur                            | 1987-2011                                             | Standard Demographic and Health Survey | SBH    |
| Zamboanga Sibugay                            | 1986-2010                                             | Census                                 | SBH    |
| Zamboanga Sibugay                            | 1987-2011                                             | Standard Demographic and Health Survey | SBH    |
| Seychelles                                   | 1952-1959, 1961-2021                                  | Vital Registration                     | VR/SRS |
| Sri Lanka                                    | 1950-1989, 1991-1995, 1997-2004, 2006-2008, 2010-2014 | Vital Registration                     | VR/SRS |
| Thailand                                     | 2010-2019                                             | Vital Registration                     | VR/SRS |
| Thailand                                     | 1959-1986                                             | Standard Demographic and Health Survey | CBH    |
| Timor-Leste                                  | 1982-2016                                             | Standard Demographic and Health Survey | CBH    |
| Viet Nam                                     | 1974-2002                                             | Standard Demographic and Health Survey | CBH    |
| Angola                                       | 1988-2015                                             | Standard Demographic and Health Survey | CBH    |
| Central African Republic                     | 1967-1994                                             | Standard Demographic and Health Survey | CBH    |
| Central African Republic                     | 1970-1994                                             | Standard Demographic and Health Survey | SBH    |
| Central African Republic                     | 1976-2010                                             | Multiple Indicator Cluster Survey      | SBH    |
| Congo (Brazzaville)                          | 1978-2011                                             | Standard Demographic and Health Survey | CBH    |
| DR Congo                                     | 1980-2013                                             | Standard Demographic and Health Survey | CBH    |
| Equatorial Guinea                            | 2000, 2005, 2008                                      | Standard Demographic and Health Survey | CBH    |
| Gabon                                        | 1973-2011                                             | Standard Demographic and Health Survey | CBH    |
| Burundi                                      | 1964-2016                                             | Standard Demographic and Health Survey | CBH    |
| Comoros                                      | 1974-1995                                             | Standard Demographic and Health Survey | CBH    |
| Djibouti                                     | 1983-1996, 1999-2002                                  | Pan Arab Project for Family Health     | CBH    |
| Djibouti                                     | 1977-2002                                             | Pan Arab Project for Family Health     | SBH    |
| Djibouti                                     | 1982-2006                                             | Multiple Indicator Cluster Survey      | SBH    |
| Djibouti                                     | 1972, 1975, 1979, 1983, 1986, 1989                    | Other Survey                           | SBH    |
| Eritrea                                      | 1970-2001                                             | Standard Demographic and Health Survey | CBH    |
| Ethiopia                                     | 1970-2015, 2017                                       | Standard Demographic and Health Survey | CBH    |
| Addis Ababa                                  | 1975-2014                                             | Standard Demographic and Health Survey | CBH    |
| Afar                                         | 1975-2014                                             | Standard Demographic and Health Survey | CBH    |
| Amhara                                       | 1971-2014                                             | Standard Demographic and Health Survey | CBH    |
| Benishangul-Gumuz                            | 1975-2014                                             | Standard Demographic and Health Survey | CBH    |
| Dire Dawa                                    | 1975-2014                                             | Standard Demographic and Health Survey | CBH    |
| Gambella                                     | 1975-2014                                             | Standard Demographic and Health Survey | CBH    |
| Harari                                       | 1975-2014                                             | Standard Demographic and Health Survey | CBH    |
| Oromia                                       | 1969-2014                                             | Standard Demographic and Health Survey | CBH    |
| Somali                                       | 1977-2014                                             | Standard Demographic and Health Survey | CBH    |
| Southern Nations, Nationalities, and Peoples | 1971-2014                                             | Standard Demographic and Health Survey | CBH    |
| Tigray                                       | 1975-2014                                             | Standard Demographic and Health Survey | CBH    |
| Kenya                                        | 1961-2014                                             | Standard Demographic and Health Survey | CBH    |
| Baringo                                      | 1984-2008                                             | Standard Demographic and Health Survey | SBH    |
| Bomet                                        | 1997-2014                                             | Standard Demographic and Health Survey | CBH    |
| Bungoma                                      | 1973-2014                                             | Standard Demographic and Health Survey | CBH    |
| Busia                                        | 1973-2014                                             | Standard Demographic and Health Survey | CBH    |
| Elgeyo Marakwet                              | 1981-2014                                             | Standard Demographic and Health Survey | CBH    |
| Embu                                         | 1973-1974, 1979-1988, 1991-2014                       | Standard Demographic and Health Survey | CBH    |
| Garissa                                      | 1987-2014                                             | Standard Demographic and Health Survey | CBH    |
| Homa Bay                                     | 1985-2014                                             | Standard Demographic and Health Survey | CBH    |
| Isiolo                                       | 1987-2011                                             | Multiple Indicator Cluster Survey      | SBH    |
| Kajiado                                      | 1975-1982, 1984-1986, 1988-1989, 1992-2014            | Standard Demographic and Health Survey | CBH    |
| Kakamega                                     | 1971-2014                                             | Standard Demographic and Health Survey | CBH    |
| Kericho                                      | 1973-2014                                             | Standard Demographic and Health Survey | CBH    |

|               |                                                                      |                                        |        |
|---------------|----------------------------------------------------------------------|----------------------------------------|--------|
| Kiambu        | 1975-2014                                                            | Standard Demographic and Health Survey | CBH    |
| Kilifi        | 1973-2014                                                            | Standard Demographic and Health Survey | CBH    |
| Kirinyaga     | 1973-2014                                                            | Standard Demographic and Health Survey | CBH    |
| Kisii         | 1971-2014                                                            | Standard Demographic and Health Survey | CBH    |
| Kisumu        | 1973-2014                                                            | Standard Demographic and Health Survey | CBH    |
| Kitui         | 1975-2014                                                            | Standard Demographic and Health Survey | CBH    |
| Kwale         | 1971-2014                                                            | Standard Demographic and Health Survey | CBH    |
| Laikipia      | 1977-1982, 1993-2014                                                 | Standard Demographic and Health Survey | CBH    |
| Lamu          | 1987-1988, 1991-1992, 1997-2014                                      | Standard Demographic and Health Survey | CBH    |
| Machakos      | 1971-2014                                                            | Standard Demographic and Health Survey | CBH    |
| Makueni       | 1985-1986, 1989-2014                                                 | Standard Demographic and Health Survey | CBH    |
| Mandera       | 1982-2006                                                            | Multiple Indicator Cluster Survey      | SBH    |
| Marsabit      | 1978-2002                                                            | Standard Demographic and Health Survey | SBH    |
| Meru          | 1973-2014                                                            | Standard Demographic and Health Survey | CBH    |
| Migori        | 1987-2014                                                            | Standard Demographic and Health Survey | CBH    |
| Mombasa       | 1973-2014                                                            | Standard Demographic and Health Survey | CBH    |
| Murang'a      | 1971-2014                                                            | Standard Demographic and Health Survey | CBH    |
| Nairobi       | 1973-2014                                                            | Standard Demographic and Health Survey | CBH    |
| Nakuru        | 1975-2014                                                            | Standard Demographic and Health Survey | CBH    |
| Nandi         | 1973-1997, 1999-2014                                                 | Standard Demographic and Health Survey | CBH    |
| Narok         | 1975-1976, 1979-1980, 1983-2014                                      | Standard Demographic and Health Survey | CBH    |
| Nyamira       | 1982-2014                                                            | Standard Demographic and Health Survey | CBH    |
| Nyandarua     | 1975-1994, 1996-2014                                                 | Standard Demographic and Health Survey | CBH    |
| Nyeri         | 1973-2014                                                            | Standard Demographic and Health Survey | CBH    |
| Samburu       | 1984-2008                                                            | Standard Demographic and Health Survey | SBH    |
| Siaya         | 1973-2014                                                            | Standard Demographic and Health Survey | CBH    |
| Taita Taveta  | 1975-2014                                                            | Standard Demographic and Health Survey | CBH    |
| Tana River    | 1993-1996, 1999-2014                                                 | Standard Demographic and Health Survey | CBH    |
| Tharaka Nithi | 1991-1992, 1997-2014                                                 | Standard Demographic and Health Survey | CBH    |
| Trans Nzoia   | 1975-2014                                                            | Standard Demographic and Health Survey | CBH    |
| Turkana       | 1985-2014                                                            | Standard Demographic and Health Survey | CBH    |
| Uasin Gishu   | 1973-2014                                                            | Standard Demographic and Health Survey | CBH    |
| Vihiga        | 1987-2014                                                            | Standard Demographic and Health Survey | CBH    |
| Wajir         | 1978-2002                                                            | Standard Demographic and Health Survey | SBH    |
| West Pokot    | 1984-2008                                                            | Standard Demographic and Health Survey | SBH    |
| Madagascar    | 1967-2008                                                            | Standard Demographic and Health Survey | CBH    |
| Malawi        | 1967-2015                                                            | Standard Demographic and Health Survey | CBH    |
| Mozambique    | 1976-2011                                                            | Standard Demographic and Health Survey | CBH    |
| Rwanda        | 1967-1993, 1995-2014, 2018                                           | Standard Demographic and Health Survey | CBH    |
| Somalia       | 1983-2006                                                            | Multiple Indicator Cluster Survey      | CBH    |
| Somalia       | 1982-2006                                                            | Multiple Indicator Cluster Survey      | SBH    |
| South Sudan   | 1983-2007                                                            | Census                                 | SBH    |
| Uganda        | 1963-2016                                                            | Standard Demographic and Health Survey | CBH    |
| Tanzania      | 1962-2015                                                            | Standard Demographic and Health Survey | CBH    |
| Zambia        | 1964-2013, 2016                                                      | Standard Demographic and Health Survey | CBH    |
| Botswana      | 1967-2011                                                            | Census                                 | SBH    |
| Botswana      | 1967-1988                                                            | Standard Demographic and Health Survey | CBH    |
| Eswatini      | 1979-2006                                                            | Standard Demographic and Health Survey | CBH    |
| Eswatini      | 1982-2006                                                            | Standard Demographic and Health Survey | SBH    |
| Eswatini      | 1985-2014                                                            | Multiple Indicator Cluster Survey      | CBH    |
| Eswatini      | 1976-2014                                                            | Multiple Indicator Cluster Survey      | SBH    |
| Lesotho       | 1967, 1971-2006                                                      | Census                                 | SBH    |
| Lesotho       | 1979-2014                                                            | Standard Demographic and Health Survey | CBH    |
| Lesotho       | 1980-2014                                                            | Standard Demographic and Health Survey | SBH    |
| Lesotho       | 2006, 2011, 2016                                                     | Multiple Indicator Cluster Survey      | CBH    |
| Lesotho       | 1975-1999                                                            | Multiple Indicator Cluster Survey      | SBH    |
| Lesotho       | 1954-1977                                                            | World Fertility Survey                 | CBH    |
| Lesotho       | 1953-1977                                                            | World Fertility Survey                 | SBH    |
| Lesotho       | 1982, 1985, 1988, 1990, 1992, 1994-1995, 1997-1998, 2002, 2005, 2008 | Other Survey                           | SBH    |
| Namibia       | 1969-2013                                                            | Standard Demographic and Health Survey | CBH    |
| South Africa  | 2003-2017                                                            | Vital Registration                     | VR/SRS |
| South Africa  | 1971-1998                                                            | Standard Demographic and Health Survey | CBH    |
| Eastern Cape  | 1972-1996                                                            | Census                                 | SBH    |
| Free State    | 2000, 2011                                                           | Census                                 | CBH    |
| Free State    | 1972-1996                                                            | Census                                 | SBH    |
| Gauteng       | 2000, 2011                                                           | Census                                 | CBH    |
| Gauteng       | 1972-1996                                                            | Census                                 | SBH    |
| KwaZulu-Natal | 1972-1996                                                            | Census                                 | SBH    |
| Limpopo       | 1972-1996                                                            | Census                                 | SBH    |

|                       |                                                                             |                                        |        |
|-----------------------|-----------------------------------------------------------------------------|----------------------------------------|--------|
| Mpumalanga            | 1972-1996                                                                   | Census                                 | SBH    |
| North West            | 2000, 2011                                                                  | Census                                 | CBH    |
| North West            | 1972-1996                                                                   | Census                                 | SBH    |
| Northern Cape         | 1972-1996                                                                   | Census                                 | SBH    |
| Western Cape          | 1972-1996                                                                   | Census                                 | SBH    |
| Zimbabwe              | 1963-2015                                                                   | Standard Demographic and Health Survey | CBH    |
| Benin                 | 1969-2017                                                                   | Standard Demographic and Health Survey | CBH    |
| Burkina Faso          | 1967-2010                                                                   | Standard Demographic and Health Survey | CBH    |
| Cabo Verde            | 1955-1957, 1959-1960, 1966-1975, 1979-1980, 1983-1985, 1990-1991, 2011-2012 | Vital Registration                     | VR/SRS |
| Cameroon              | 1968-2011, 2016                                                             | Standard Demographic and Health Survey | CBH    |
| Chad                  | 1969-2014                                                                   | Standard Demographic and Health Survey | CBH    |
| Côte d'Ivoire         | 1967-2011                                                                   | Standard Demographic and Health Survey | CBH    |
| The Gambia            | 1985-2013, 2018                                                             | Standard Demographic and Health Survey | CBH    |
| Ghana                 | 1962-2014                                                                   | Standard Demographic and Health Survey | CBH    |
| Ghana                 | 1980-2007                                                                   | Other Demographic and Health Survey    | CBH    |
| Guinea                | 1972-2012, 2018                                                             | Standard Demographic and Health Survey | CBH    |
| Guinea-Bissau         | 1986-2013, 2017                                                             | Multiple Indicator Cluster Survey      | CBH    |
| Guinea-Bissau         | 1975-2013                                                                   | Multiple Indicator Cluster Survey      | SBH    |
| Liberia               | 1961-1989, 1991-2013, 2018                                                  | Standard Demographic and Health Survey | CBH    |
| Mali                  | 1964-2012, 2016                                                             | Standard Demographic and Health Survey | CBH    |
| Mauritania            | 1973-2000, 2007, 2012, 2017                                                 | Standard Demographic and Health Survey | CBH    |
| Niger                 | 1966-2011                                                                   | Standard Demographic and Health Survey | CBH    |
| Nigeria               | 1963-2012, 2016                                                             | Standard Demographic and Health Survey | CBH    |
| São Tomé and Príncipe | 1955-1958, 1962-1971, 1977-1979, 1984-1985, 1987                            | Vital Registration                     | VR/SRS |
| São Tomé and Príncipe | 1973, 1976, 1980, 1982, 1984, 1987                                          | Census                                 | SBH    |
| São Tomé and Príncipe | 1985-2008                                                                   | Standard Demographic and Health Survey | CBH    |
| São Tomé and Príncipe | 1984-2008                                                                   | Standard Demographic and Health Survey | SBH    |
| São Tomé and Príncipe | 1990-2013, 2017                                                             | Multiple Indicator Cluster Survey      | CBH    |
| São Tomé and Príncipe | 1976-2013                                                                   | Multiple Indicator Cluster Survey      | SBH    |
| Senegal               | 1963-2017                                                                   | Standard Demographic and Health Survey | CBH    |
| Sierra Leone          | 1981-2013, 2018                                                             | Standard Demographic and Health Survey | CBH    |
| Togo                  | 1965-2013                                                                   | Standard Demographic and Health Survey | CBH    |

**Appendix Table S7: New data sources added for GBD 2021 mortality estimation**

| Location                 | Year      | Sources                                                                    |
|--------------------------|-----------|----------------------------------------------------------------------------|
| Albania                  | 2011-2011 | Albania Vital Registration - Deaths by Sex and Age Group                   |
| Algeria                  | 2018-2019 | Algeria Multiple Indicator Cluster Survey 2018-2019                        |
| American Samoa           | 2018-2018 | American Samoa NVSS Custom Mortality Data 2018                             |
| American Samoa           | 2019-2019 | American Samoa NVSS Custom Mortality Data 2019                             |
| Andorra                  | 2017-2017 | Andorra Deaths by Week, Sex and 5-year Age Group - Eurostat                |
| Antigua and Barbuda      | 2008-2020 | Antigua and Barbuda Deaths by Age Group and Sex 2008-2020                  |
| Argentina                | 2019-2019 | Argentina Vital Statistics 2019                                            |
| Argentina                | 2020-2020 | Argentina Vital Statistics 2020                                            |
| Armenia                  | 2017-2017 | Armenia Deaths by Week, Sex and 5-year Age Group - Eurostat                |
| Australia                | 2019-2019 | Australia Vital Registration - Deaths 2019                                 |
| Austria                  | 2017-2017 | Austria Deaths by Week, Sex and 5-year Age Group - Eurostat                |
| Azerbaijan               | 2020-2020 | Azerbaijan Demographic Indicators 2021                                     |
| Bangladesh               | 2017-2018 | Bangladesh Demographic and Health Survey 2017-2018                         |
| Bangladesh               | 2019-2019 | Bangladesh Multiple Indicator Cluster Survey 2019                          |
| Belarus                  | 1990-2019 | Belarus Demographic Yearbook 2019                                          |
| Belarus                  | 2000-2020 | Belarus Statistical Yearbook 2020                                          |
| Belgium                  | 2000-2020 | Belgium Human Mortality Database Short-term Mortality Fluctuations (STMF)  |
| Belgium                  | 1994-2020 | Belgium Mortality Tables: In Exact Age 1994-2022                           |
| Belgium                  | 2017-2017 | Belgium Vital Registration - Causes of Deaths 2017                         |
| Belgium                  | 2018-2018 | Belgium Vital Registration - Causes of Deaths 2018                         |
| Bolivia                  | 1990-1990 | Bolivia Integrated Household Survey 1990                                   |
| Bosnia and Herzegovina   | 2017-2017 | Bosnia and Herzegovina Demography 2017                                     |
| Bosnia and Herzegovina   | 2018-2018 | Bosnia and Herzegovina Demography 2018                                     |
| Bosnia and Herzegovina   | 2019-2019 | Bosnia and Herzegovina Demography 2019                                     |
| Botswana                 | 2007-2017 | Botswana Vital Statistics Report 2017                                      |
| Brazil                   | 2018-2018 | Brazil Mortality Information System - Deaths 2018                          |
| Brazil                   | 2019-2019 | Brazil Mortality Information System - Deaths 2019                          |
| Brazil                   | 2020-2020 | Brazil Mortality Information System - Deaths 2020                          |
| Brazil                   | 2021-2021 | Brazil Mortality Information System - Deaths 2021 (preliminary)            |
| Brazil                   | 1990-2018 | Brazil Mortality Rate in Children Under 5 Years 1990-2018                  |
| Brazil                   | 2015-2015 | Brazil National Household Sample Survey 2015                               |
| Brunei                   | 2015-2020 | Brunei Vital Statistics 2020                                               |
| Bulgaria                 | 2010-2020 | Bulgaria Human Mortality Database Short-term Mortality Fluctuations (STMF) |
| Burundi                  | 2008-2009 | Burundi Population and Housing Census 2008-2009                            |
| Cameroon                 | 2018-2019 | Cameroon Demographic and Health Survey 2018-2019                           |
| Canada                   | 1971-1971 | Canada CANSIM Database - Estimates of Deaths, by Age and Sex, Annual       |
| Central African Republic | 2018-2019 | Central African Republic Multiple Indicator Cluster Survey 2018-2019       |
| Chad                     | 2019-2019 | Chad Multiple Indicator Cluster Survey 2019                                |
| Chile                    | 2016-2020 | Chile Human Mortality Database Short-term Mortality Fluctuations (STMF)    |
| Chile                    | 2019-2019 | Chile Vital Statistics - Deaths 2019                                       |
| Chile                    | 2020-2020 | Chile Vital Statistics - Deaths 2020                                       |
| China                    | 2011-2011 | China Sample Survey on Population Changes 2011                             |
| China                    | 2012-2012 | China Sample Survey on Population Changes 2012                             |
| China                    | 2019-2019 | Hong Kong Vital Registration Death Data 2019                               |
| Colombia                 | 2017-2017 | Colombia Vital Statistics - Deaths 2017                                    |

|                    |           |                                                                                  |
|--------------------|-----------|----------------------------------------------------------------------------------|
| Colombia           | 2018-2018 | Colombia Vital Statistics - Deaths 2018                                          |
| Colombia           | 2019-2019 | Colombia Vital Statistics - Deaths 2019                                          |
| Colombia           | 2020-2020 | Colombia Vital Statistics - Deaths 2020                                          |
| Costa Rica         | 2017-2017 | Costa Rica Registered Deaths 2017                                                |
| Costa Rica         | 2018-2018 | Costa Rica Registered Deaths 2018                                                |
| Costa Rica         | 2019-2019 | Costa Rica Registered Deaths 2019                                                |
| Costa Rica         | 2021-2021 | Costa Rica Registered Deaths 2021 (Preliminary)                                  |
| Croatia            | 2017-2017 | Croatia Deaths by Week, Sex and 5-year Age Group - Eurostat                      |
| Croatia            | 2001-2020 | Croatia Human Mortality Database Short-term Mortality Fluctuations (STMF)        |
| Cuba               | 1774-2021 | Cuba Demographic Yearbook 2021                                                   |
| Cuba               | 1960-2019 | Cuba Health Statistics Yearbook 2019                                             |
| Cyprus             | 2017-2017 | Cyprus Deaths by Week, Sex and 5-year Age Group - Eurostat                       |
| Cyprus             | 2014-2018 | Cyprus Demographic Statistics 2018                                               |
| Czechia            | 2020-2020 | Czech Republic Demographic Yearbook 2020                                         |
| Czechia            | 2005-2020 | Czech Republic Human Mortality Database Short-term Mortality Fluctuations (STMF) |
| North Korea        | 2017-2017 | North Korea Multiple Indicator Cluster Survey 2017                               |
| North Korea        | 2014-2014 | North Korea Socio-Economic, Demographic and Health Survey 2014                   |
| DR Congo           | 2017-2018 | Democratic Republic of the Congo Multiple Indicator Cluster Survey 2017-2018     |
| Denmark            | 2007-2020 | Denmark Human Mortality Database Short-term Mortality Fluctuations (STMF)        |
| Dominican Republic | 2019-2019 | Dominican Republic Multiple Indicator Cluster Survey 2019                        |
| Dominican Republic | 2019-2019 | Dominican Republic Vital Statistics Yearbook 2019                                |
| Dominican Republic | 2021-2021 | Dominican Republic Vital Statistics Yearbook 2021                                |
| Ecuador            | 2018-2018 | Ecuador General Deaths 2018                                                      |
| Ecuador            | 2019-2019 | Ecuador General Deaths 2019                                                      |
| Ecuador            | 2020-2020 | Ecuador General Deaths 2020                                                      |
| El Salvador        | 2016-2016 | El Salvador Vital Statistics - Deaths 2016                                       |
| Estonia            | 2000-2020 | Estonia Human Mortality Database Short-term Mortality Fluctuations (STMF)        |
| Ethiopia           | 2019-2019 | Ethiopia Interim Demographic and Health Survey 2019                              |
| Finland            | 1990-1990 | Finland Deaths by Age (5-year), Sex and Area                                     |
| Finland            | 1990-2020 | Finland Human Mortality Database Short-term Mortality Fluctuations (STMF)        |
| France             | 2018-2018 | France Births, Deaths and Marriages in 2018 - Deaths                             |
| France             | 2019-2019 | France Births, Deaths and Marriages in 2019 - Deaths                             |
| France             | 2020-2020 | France Births, Deaths and Marriages in 2020 - Deaths                             |
| France             | 2000-2020 | France Human Mortality Database Short-term Mortality Fluctuations (STMF)         |
| The Gambia         | 2019-2020 | Gambia Demographic and Health Survey 2019-2020                                   |
| The Gambia         | 2018-2018 | Gambia Multiple Indicator Cluster Survey 2018                                    |
| Georgia            | 1990-2016 | Demographic Situation in Georgia 2017                                            |
| Georgia            | 1990-2016 | Demographic Situation in Georgia 2017                                            |
| Georgia            | 1995-2018 | Demographic Situation in Georgia 2018                                            |
| Georgia            | 1995-2018 | Demographic Situation in Georgia 2018                                            |
| Georgia            | 1996-2019 | Demographic Situation in Georgia 2019                                            |
| Georgia            | 1996-2019 | Demographic Situation in Georgia 2019                                            |
| Georgia            | 1994-2021 | Georgia Deaths by Age and Sex 1994-2021                                          |
| Georgia            | 1994-2021 | Georgia Deaths by Age and Sex 1994-2021                                          |
| Georgia            | 2014-2014 | Georgia Deaths by Regions, Self-governed Units, Age and Sex 2014                 |
| Georgia            | 2014-2014 | Georgia Deaths by Regions, Self-governed Units, Age and Sex 2014                 |
| Georgia            | 2020-2020 | Georgia Vital Registration - Deaths 2020                                         |

|               |           |                                                                           |
|---------------|-----------|---------------------------------------------------------------------------|
| Georgia       | 2020-2020 | Georgia Vital Registration - Deaths 2020                                  |
| Germany       | 1956-1956 | Germany Deaths by Sex and Single Year Age Groups                          |
| Germany       | 1946-2006 | Germany Natural Population Change 2006                                    |
| Germany       | 1946-2007 | Germany Natural Population Change 2007                                    |
| Germany       | 1946-2008 | Germany Natural Population Change 2008                                    |
| Germany       | 1946-2009 | Germany Natural Population Change 2009                                    |
| Germany       | 1946-2010 | Germany Natural Population Change 2010                                    |
| Ghana         | 2017-2018 | Ghana Multiple Indicator Cluster Survey 2017-2018                         |
| Greece        | 2019-2020 | Greece Data on Vital Statistics 2020                                      |
| Greece        | 2000-2017 | Greece Deaths by Sex and Age of the Deceased 2000-2017                    |
| Greece        | 2016-2020 | Greece Human Mortality Database Short-term Mortality Fluctuations (STMF)  |
| Guam          | 2018-2018 | Guam NVSS Custom Mortality Data 2018                                      |
| Guam          | 2019-2019 | Guam NVSS Custom Mortality Data 2019                                      |
| Guatemala     | 2010-2010 | Guatemala Vital Statistics 2010                                           |
| Guatemala     | 2011-2011 | Guatemala Vital Statistics 2011                                           |
| Guatemala     | 2003-2012 | Guatemala Vital Statistics 2012                                           |
| Guatemala     | 2003-2013 | Guatemala Vital Statistics 2013                                           |
| Guatemala     | 2004-2014 | Guatemala Vital Statistics 2014                                           |
| Guatemala     | 2015-2015 | Guatemala Vital Statistics 2015                                           |
| Guatemala     | 2016-2016 | Guatemala Vital Statistics 2016                                           |
| Guatemala     | 2018-2018 | Guatemala Vital Statistics 2018                                           |
| Guatemala     | 2019-2019 | Guatemala Vital Statistics 2019                                           |
| Guatemala     | 2020-2020 | Guatemala Vital Statistics 2020                                           |
| Guinea        | 2018-2018 | Guinea Demographic and Health Survey 2018                                 |
| Guinea-Bissau | 2018-2019 | Guinea-Bissau Multiple Indicator Cluster Survey 2018-2019                 |
| Guyana        | 2019-2020 | Guyana Multiple Indicator Cluster Survey 2019-2020                        |
| Honduras      | 2019-2019 | Honduras Multiple Indicator Cluster Survey 2019                           |
| Hungary       | 2000-2020 | Hungary Human Mortality Database Short-term Mortality Fluctuations (STMF) |
| Iceland       | 2019-2019 | Iceland Causes of Death Register 2019                                     |
| Iceland       | 2020-2020 | Iceland Causes of Death Register 2020                                     |
| Iceland       | 2017-2020 | Iceland Human Mortality Database Short-term Mortality Fluctuations (STMF) |
| India         | 2017-2017 | India - Delhi Medical Certification of Cause of Death Report 2017         |
| India         | 2016-2016 | India - Karnataka Medical Certification of Cause of Death Report 2016     |
| India         | 2017-2017 | India - Karnataka Medical Certification of Cause of Death Report 2017     |
| India         | 2011-2011 | India - Kerala Medical Certification of Cause of Death Report 2011        |
| India         | 2012-2012 | India - Kerala Medical Certification of Cause of Death Report 2012        |
| India         | 2016-2016 | India - Kerala Medical Certification of Cause of Death Report 2016        |
| India         | 2017-2017 | India - Kerala Medical Certification of Cause of Death Report 2017        |
| India         | 2019-2021 | India Demographic and Health Survey 2019-2020                             |
| India         | 2006-2018 | India SRS Statistical Report 2018                                         |
| India         | 2019-2019 | India SRS Statistical Report 2019                                         |
| India         | 1985-2020 | India SRS Statistical Report 2020                                         |
| Iran          | 2020-2020 | Iran Selected Statistics of Vital Events 2020                             |
| Iraq          | 2019-2019 | Iraq Annual Statistical Report 2019                                       |
| Iraq          | 2018-2018 | Iraq Multiple Indicator Cluster Survey 2018                               |
| Israel        | 1955-2017 | Israel Statistical Abstract 2018                                          |
| Israel        | 1948-2018 | Israel Statistical Abstract 2019                                          |

|            |           |                                                                              |
|------------|-----------|------------------------------------------------------------------------------|
| Italy      | 2011-2022 | Italy Daily Mortality Data 2011-2022                                         |
| Italy      | 2017-2017 | Italy Deaths by Week, Sex and 5-year Age Group - Eurostat                    |
| Italy      | 2015-2020 | Italy Human Mortality Database Short-term Mortality Fluctuations (STMF)      |
| Italy      | 2017-2017 | Italy Vital Registration - Deaths 2017                                       |
| Italy      | 2018-2018 | Italy Vital Registration - Deaths 2018                                       |
| Italy      | 2019-2019 | Italy Vital Registration - Deaths 2019                                       |
| Italy      | 2020-2020 | Italy Vital Registration - Deaths 2020                                       |
| Jamaica    | 2007-2007 | Jamaica Vital Statistics Report 2007                                         |
| Jamaica    | 2008-2008 | Jamaica Vital Statistics Report 2008                                         |
| Japan      | 1899-2004 | Japan Deaths by Age Groups and Sex 1899-2004                                 |
| Japan      | 2018-2018 | Japan Deaths by Sex, Age, and Prefecture and 21 major cities 2018            |
| Japan      | 2018-2018 | Japan Vital Registration - Deaths 2018                                       |
| Japan      | 2019-2019 | Japan Vital Registration - Deaths 2019                                       |
| Japan      | 2012-2022 | Japan Vital Registration - Monthly Death Data 2012-2022                      |
| Japan      | 2010-2021 | Japan Vital Registration - Weekly Causes of Death Data 2010-2021             |
| Kiribati   | 2018-2019 | Kiribati Multiple Indicator Cluster Survey 2018-2019                         |
| Kuwait     | 2020-2020 | Kuwait Annual Bulletin for Vital Statistics - Births and Deaths 2020         |
| Kuwait     | 1957-2013 | Kuwait Annual Statistical Abstract 2013                                      |
| Kyrgyzstan | 2018-2018 | Kyrgyzstan Multiple Indicator Cluster Survey 2018                            |
| Latvia     | 2000-2020 | Latvia Human Mortality Database Short-term Mortality Fluctuations (STMF)     |
| Lebanon    | 2007-2013 | Lebanon Statistical Bulletin 2013                                            |
| Lesotho    | 2018-2018 | Lesotho Multiple Indicator Cluster Survey 2018                               |
| Liberia    | 2019-2020 | Liberia Demographic and Health Survey 2019-2020                              |
| Lithuania  | 2016-2016 | Lithuania Deaths by Age, Place of Residence, and Gender                      |
| Lithuania  | 2000-2020 | Lithuania Human Mortality Database Short-term Mortality Fluctuations (STMF)  |
| Luxembourg | 1980-1980 | Luxembourg Deaths by 5 Year Age Groups                                       |
| Luxembourg | 2000-2020 | Luxembourg Human Mortality Database Short-term Mortality Fluctuations (STMF) |
| Madagascar | 2021-2021 | Madagascar Demographic and Health Survey 2021                                |
| Madagascar | 2018-2018 | Madagascar Multiple Indicator Cluster Survey 2018                            |
| Malawi     | 2019-2020 | Malawi Multiple Indicator Cluster Survey 2019-2020                           |
| Malaysia   | 2015-2017 | Malaysia Health Indicators 2018                                              |
| Malaysia   | 2018-2018 | Malaysia Vital Statistics 2019                                               |
| Malaysia   | 2020-2020 | Malaysia Vital Statistics 2021                                               |
| Maldives   | 1985-2020 | Maldives Statistical Yearbook 2020                                           |
| Maldives   | 2010-2020 | Maldives Statistical Yearbook 2021                                           |
| Mali       | 2018-2018 | Mali Demographic and Health Survey 2018                                      |
| Malta      | 2017-2017 | Malta Deaths by Week, Sex and 5-year Age Group - Eurostat                    |
| Mauritania | 2019-2021 | Mauritania Demographic and Health Survey 2019-2020                           |
| Mauritius  | 1999-2019 | Mauritius Digest of Demographic Statistics 2019                              |
| Mexico     | 2018-2018 | Mexico Vital Registration - Deaths 2018                                      |
| Mexico     | 2019-2019 | Mexico Vital Registration - Deaths 2019                                      |
| Mexico     | 2020-2020 | Mexico Vital Registration - Deaths 2020                                      |
| Mexico     | 2021-2021 | Mexico Vital Registration - Deaths 2021                                      |
| Mongolia   | 2012-2012 | Mongolia - Khuvsgul Multiple Indicator Cluster Survey 2012                   |
| Mongolia   | 1989-1989 | Mongolia Deaths by Age and Sex                                               |
| Mongolia   | 2018-2018 | Mongolia Multiple Indicator Cluster Survey 2018                              |
| Mongolia   | 2018-2018 | Mongolia Vital Registration - Deaths 2018                                    |



|                          |           |                                                                            |
|--------------------------|-----------|----------------------------------------------------------------------------|
| Mongolia                 | 2019-2019 | Mongolia Vital Registration - Deaths 2019                                  |
| Mongolia                 | 2020-2020 | Mongolia Vital Registration - Deaths 2020                                  |
| Nepal                    | 2019-2019 | Nepal Multiple Indicator Cluster Survey 2019                               |
| Netherlands              | 1988-1988 | Netherlands Deceased by Gender, Age, Marital Status, and Region            |
| New Zealand              | 2016-2016 | New Zealand Mortality Collection 2016                                      |
| New Zealand              | 2017-2017 | New Zealand Mortality Collection 2017                                      |
| New Zealand              | 2018-2018 | New Zealand Mortality Collection 2018                                      |
| Nicaragua                | 2016-2017 | Nicaragua Compendium of Vital Statistics 2016-2017                         |
| Nicaragua                | 2019-2020 | Nicaragua Compendium of Vital Statistics 2019-2020                         |
| Nigeria                  | 1994-2007 | Nigeria Report of Livebirths, Deaths and Stillbirths 1994-2007             |
| North Macedonia          | 2012-2018 | Macedonia Statistical Yearbook 2018                                        |
| North Macedonia          | 2014-2019 | Macedonia Statistical Yearbook 2019                                        |
| Northern Mariana Islands | 2018-2018 | Northern Mariana Islands NVSS Custom Mortality Data 2018                   |
| Northern Mariana Islands | 2019-2019 | Northern Mariana Islands NVSS Custom Mortality Data 2019                   |
| Norway                   | 2018-2018 | Norway Cause of Death Registry 2018                                        |
| Norway                   | 2019-2019 | Norway Cause of Death Registry 2019                                        |
| Norway                   | 2020-2020 | Norway Cause of Death Registry 2020                                        |
| Norway                   | 2017-2017 | Norway Deaths by Week, Sex and 5-year Age Group - Eurostat                 |
| Norway                   | 2000-2020 | Norway Human Mortality Database Short-term Mortality Fluctuations (STMF)   |
| Pakistan                 | 2016-2017 | Pakistan - Khyber Pakhtunkhwa Multiple Indicator Cluster Survey 2016-2017  |
| Pakistan                 | 2018-2019 | Pakistan - Sindh Multiple Indicator Cluster Survey 2018-2019               |
| Pakistan                 | 1992-1992 | Pakistan Demographic Survey 1992                                           |
| Palestine                | 2018-2018 | Palestine - Gaza Strip and West Bank Mortality by Sex, Age, and Cause 2018 |
| Palestine                | 2019-2020 | Palestine Multiple Indicator Cluster Survey 2019-2020                      |
| Panama                   | 2017-2017 | Panama Vital Statistics, Volume III - Deaths 2017                          |
| Panama                   | 2020-2020 | Panama Vital Statistics, Volume III - Deaths 2020                          |
| Papua New Guinea         | 2016-2018 | Papua New Guinea Demographic and Health Survey 2016-2018                   |
| Paraguay                 | 2004-2004 | Paraguay Vital Registration - Deaths 2004                                  |
| Paraguay                 | 2005-2005 | Paraguay Vital Registration - Deaths 2005                                  |
| Paraguay                 | 2006-2006 | Paraguay Vital Registration - Deaths 2006                                  |
| Paraguay                 | 2007-2007 | Paraguay Vital Registration - Deaths 2007                                  |
| Paraguay                 | 2008-2008 | Paraguay Vital Registration - Deaths 2008                                  |
| Paraguay                 | 2009-2009 | Paraguay Vital Registration - Deaths 2009                                  |
| Paraguay                 | 2010-2010 | Paraguay Vital Registration - Deaths 2010                                  |
| Paraguay                 | 2011-2011 | Paraguay Vital Registration - Deaths 2011                                  |
| Paraguay                 | 2012-2012 | Paraguay Vital Registration - Deaths 2012                                  |
| Paraguay                 | 2013-2013 | Paraguay Vital Registration - Deaths 2013                                  |
| Paraguay                 | 2014-2014 | Paraguay Vital Registration - Deaths 2014                                  |
| Paraguay                 | 2015-2015 | Paraguay Vital Registration - Deaths 2015                                  |
| Paraguay                 | 2016-2016 | Paraguay Vital Registration - Deaths 2016                                  |
| Paraguay                 | 2017-2017 | Paraguay Vital Registration - Deaths 2017                                  |
| Paraguay                 | 2017-2017 | Paraguay Vital Statistics 2017                                             |
| Paraguay                 | 2018-2018 | Paraguay Vital Statistics 2018                                             |
| Paraguay                 | 2019-2019 | Paraguay Vital Statistics 2019                                             |
| Paraguay                 | 2010-2020 | Paraguay Vital Statistics 2020                                             |
| Peru                     | 2014-2018 | Perú: Birth, Mortality and Marriage, 2018                                  |
| Peru                     | 2015-2019 | Perú: Birth, Mortality and Marriage, 2019                                  |

|                       |           |                                                                                             |
|-----------------------|-----------|---------------------------------------------------------------------------------------------|
| Peru                  | 2020-2020 | Perú: Birth, Mortality and Marriage, 2020                                                   |
| Philippines           | 2016-2016 | Philippines Vital Registration - Deaths 2016                                                |
| Philippines           | 2017-2017 | Philippines Vital Registration - Deaths 2017                                                |
| Philippines           | 2018-2018 | Philippines Vital Registration - Deaths 2018                                                |
| Philippines           | 2020-2020 | Philippines Vital Registration - Deaths 2020                                                |
| Poland                | 2004-2004 | Poland Deaths by Sex and Age                                                                |
| Poland                | 2000-2020 | Poland Human Mortality Database Short-term Mortality Fluctuations (STMF)                    |
| Poland                | 1999-1999 | Poland Vital Registration - Causes of Death Data 1999                                       |
| Poland                | 2000-2000 | Poland Vital Registration - Causes of Death Data 2000                                       |
| Poland                | 2001-2001 | Poland Vital Registration - Causes of Death Data 2001                                       |
| Poland                | 2002-2002 | Poland Vital Registration - Causes of Death Data 2002                                       |
| Poland                | 2003-2003 | Poland Vital Registration - Causes of Death Data 2003                                       |
| Poland                | 2004-2004 | Poland Vital Registration - Causes of Death Data 2004                                       |
| Poland                | 2005-2005 | Poland Vital Registration - Causes of Death Data 2005                                       |
| Poland                | 2006-2006 | Poland Vital Registration - Causes of Death Data 2006                                       |
| Poland                | 2007-2007 | Poland Vital Registration - Causes of Death Data 2007                                       |
| Poland                | 2008-2008 | Poland Vital Registration - Causes of Death Data 2008                                       |
| Poland                | 2009-2009 | Poland Vital Registration - Causes of Death Data 2009                                       |
| Poland                | 2010-2010 | Poland Vital Registration - Causes of Death Data 2010                                       |
| Poland                | 2011-2011 | Poland Vital Registration - Causes of Death Data 2011                                       |
| Poland                | 2012-2012 | Poland Vital Registration - Causes of Death Data 2012                                       |
| Poland                | 2013-2013 | Poland Vital Registration - Causes of Death Data 2013                                       |
| Poland                | 2014-2014 | Poland Vital Registration - Causes of Death Data 2014                                       |
| Poland                | 2015-2015 | Poland Vital Registration - Causes of Death Data 2015                                       |
| Poland                | 2016-2016 | Poland Vital Registration - Causes of Death Data 2016                                       |
| Poland                | 2017-2017 | Poland Vital Registration - Causes of Death Data 2017                                       |
| Poland                | 2018-2018 | Poland Vital Registration - Causes of Death Data 2018                                       |
| Poland                | 2019-2019 | Poland Vital Registration - Causes of Death Data 2019                                       |
| Portugal              | 2000-2020 | Portugal Human Mortality Database Short-term Mortality Fluctuations (STMF)                  |
| Puerto Rico           | 2018-2018 | Puerto Rico NVSS Custom Mortality Data 2018                                                 |
| Puerto Rico           | 2019-2019 | Puerto Rico NVSS Custom Mortality Data 2019                                                 |
| Qatar                 | 2009-2018 | Qatar Vital Statistics Annual Bulletin 2018                                                 |
| Qatar                 | 2010-2019 | Qatar Vital Statistics Annual Bulletin 2019                                                 |
| Romania               | 2017-2017 | Romania Deaths by Week, Sex and 5-year Age Group - Eurostat                                 |
| Romania               | 2019-2019 | Romania Demographic Events in 2019                                                          |
| Romania               | 2020-2020 | Romania Demographic Events in 2020                                                          |
| Russia                | 2015-2021 | Russia Mortality Rates by Region, Age, Sex, Cause of Death, and 5-Year Age Groups 2015-2021 |
| Russia                | 2001-2001 | Russia Vital Registration - Deaths 2001                                                     |
| Russia                | 2002-2002 | Russia Vital Registration - Deaths 2002                                                     |
| Russia                | 2003-2003 | Russia Vital Registration - Deaths 2003                                                     |
| Rwanda                | 2019-2020 | Rwanda Demographic and Health Survey 2019-2020                                              |
| Samoa                 | 2019-2020 | Samoa Multiple Indicator Cluster Survey 2019-2020                                           |
| São Tomé and Príncipe | 2019-2019 | Sao Tome and Principe Multiple Indicator Cluster Survey 2019                                |
| Scotland              | 2000-2020 | Scotland Human Mortality Database Short-term Mortality Fluctuations (STMF)                  |
| Senegal               | 2018-2018 | Senegal Continuous Demographic and Health Survey 2018                                       |
| Senegal               | 2019-2019 | Senegal Continuous Demographic and Health Survey 2019                                       |
| Serbia                | 2017-2017 | Serbia Deaths by Week, Sex and 5-year Age Group - Eurostat                                  |

|                            |           |                                                                               |
|----------------------------|-----------|-------------------------------------------------------------------------------|
| Serbia                     | 2019-2019 | Serbia Multiple Indicator Cluster Survey 2019                                 |
| Seychelles                 | 1971-2018 | Seychelles Statistical Bulletin: Population and Vital Statistics 2018         |
| Seychelles                 | 2020-2020 | Seychelles Statistical Bulletin: Population and Vital Statistics 2020         |
| Seychelles                 | 2021-2021 | Seychelles Statistical Bulletin: Population and Vital Statistics 2021         |
| Sierra Leone               | 2019-2019 | Sierra Leone Demographic and Health Survey 2019                               |
| Singapore                  | 2018-2018 | Singapore Causes of Death 2018                                                |
| Singapore                  | 2019-2019 | Singapore Causes of Death 2019                                                |
| Singapore                  | 2020-2020 | Singapore Causes of Death 2020                                                |
| Singapore                  | 1999-2018 | Singapore Report on Registration of Births and Deaths 2018                    |
| Singapore                  | 1999-2019 | Singapore Report on Registration of Births and Deaths 2019                    |
| Singapore                  | 2002-2021 | Singapore Report on Registration of Births and Deaths 2021                    |
| Slovakia                   | 2000-2020 | Slovakia Human Mortality Database Short-term Mortality Fluctuations (STMF)    |
| Slovakia                   | 2017-2017 | Slovakia Vital Registration - Deaths 2017                                     |
| Slovenia                   | 2000-2020 | Slovenia Human Mortality Database Short-term Mortality Fluctuations (STMF)    |
| South Africa               | 2000-2018 | South Africa Rapid Mortality Surveillance Report 2018                         |
| South Africa               | 1997-2017 | South Africa Vital Registration - Causes of Death 2017                        |
| Spain                      | 2018-2018 | Spain Cause of Death Statistics 2018                                          |
| Spain                      | 2019-2019 | Spain Cause of Death Statistics 2019                                          |
| Spain                      | 2020-2020 | Spain Cause of Death Statistics 2020                                          |
| Spain                      | 2017-2017 | Spain Deaths by Week, Sex and 5-year Age Group - Eurostat                     |
| Spain                      | 2000-2020 | Spain Human Mortality Database Short-term Mortality Fluctuations (STMF)       |
| Sri Lanka                  | 2014-2014 | Sri Lanka Vital Statistics - Deaths 2014                                      |
| Stockholm                  | 2018-2018 | Sweden Cause of Death Register 2018                                           |
| Stockholm                  | 2019-2019 | Sweden Cause of Death Register 2019                                           |
| Stockholm                  | 2020-2020 | Sweden Cause of Death Register 2020                                           |
| Suriname                   | 2018-2018 | Suriname Multiple Indicator Cluster Survey 2018                               |
| Sweden                     | 2018-2018 | Sweden Cause of Death Register 2018                                           |
| Sweden                     | 2019-2019 | Sweden Cause of Death Register 2019                                           |
| Sweden                     | 2020-2020 | Sweden Cause of Death Register 2020                                           |
| Sweden                     | 1968-1968 | Sweden Deaths by Region, Age and Sex                                          |
| Switzerland                | 2000-2020 | Switzerland Human Mortality Database Short-term Mortality Fluctuations (STMF) |
| Taiwan (province of China) | 2000-2020 | Taiwan Human Mortality Database Short-term Mortality Fluctuations (STMF)      |
| Taiwan (province of China) | 1981-2017 | Taiwan Statistics of Causes of Death 2017                                     |
| Togo                       | 2017-2017 | Togo Multiple Indicator Cluster Survey 2017                                   |
| Tonga                      | 2019-2019 | Tonga Multiple Indicator Cluster Survey 2019                                  |
| Trinidad and Tobago        | 2015-2015 | Trinidad and Tobago Vital Registration - Deaths by Sex and Age Group 2015     |
| Trinidad and Tobago        | 2016-2016 | Trinidad and Tobago Vital Registration - Deaths by Sex and Age Group 2016     |
| Trinidad and Tobago        | 2017-2017 | Trinidad and Tobago Vital Registration - Deaths by Sex and Age Group 2017     |
| Trinidad and Tobago        | 2018-2018 | Trinidad and Tobago Vital Registration - Deaths by Sex and Age Group 2018     |
| Tunisia                    | 2018-2018 | Tunisia Multiple Indicator Cluster Survey 2018                                |
| Turkmenistan               | 2019-2019 | Turkmenistan Multiple Indicator Cluster Survey 2019                           |
| Tuvalu                     | 2019-2020 | Tuvalu Multiple Indicator Cluster Survey 2019-2020                            |
| Türkiye                    | 2017-2017 | Turkey Death Statistics 2017                                                  |
| Türkiye                    | 2018-2018 | Turkey Death Statistics 2018                                                  |
| UK                         | 2000-2020 | Scotland Human Mortality Database Short-term Mortality Fluctuations (STMF)    |
| UK                         | 2018-2018 | United Kingdom - England and Wales Mortality Statistics 2018                  |
| UK                         | 2019-2019 | United Kingdom - England and Wales Mortality Statistics 2019                  |

|                |           |                                                                                           |
|----------------|-----------|-------------------------------------------------------------------------------------------|
| UK             | 2020-2020 | United Kingdom - England and Wales Mortality Statistics 2020                              |
| UK             | 2021-2021 | United Kingdom - England and Wales Mortality Statistics 2021                              |
| UK             | 1955-2019 | United Kingdom - Northern Ireland Deaths by Age 1955-2019                                 |
| UK             | 1887-2019 | United Kingdom - Northern Ireland Deaths by Sex 1887-2019                                 |
| UK             | 2010-2020 | United Kingdom - Northern Ireland Registrar General Annual Report 2020                    |
| UK             | 1979-1979 | United Kingdom - Northern Ireland Vital Registration - Deaths 1979 ICD9                   |
| UK             | 1946-2018 | United Kingdom - Scotland Vital Events Reference Tables 2018                              |
| UK             | 1946-2019 | United Kingdom - Scotland Vital Events Reference Tables 2019                              |
| UK             | 1946-2020 | United Kingdom - Scotland Vital Events Reference Tables 2020                              |
| UK             | 1979-1979 | United Kingdom - Scotland Vital Registration - Deaths 1979 ICD9                           |
| UK             | 2017-2017 | United Kingdom Vital Registration Deaths 2017 ICD10                                       |
| UK             | 2018-2018 | United Kingdom Vital Registration Deaths 2018                                             |
| UK             | 2018-2018 | United Kingdom Vital Registration Deaths 2018 ICD10                                       |
| UK             | 2019-2019 | United Kingdom Vital Registration Deaths 2019 ICD10                                       |
| UK             | 2020-2020 | United Kingdom Vital Registration Deaths 2020                                             |
| Virgin Islands | 2018-2018 | United States Virgin Islands NVSS Custom Mortality Data 2018                              |
| Virgin Islands | 2019-2019 | United States Virgin Islands NVSS Custom Mortality Data 2019                              |
| USA            | 2020-2020 | United States CDC Wonder Mortality Statistics 2020                                        |
| USA            | 2015-2015 | United States NVSS Custom Mortality Data 2015 and United States Military Deaths 2000-2018 |
| USA            | 2016-2016 | United States NVSS Custom Mortality Data 2016 and United States Military Deaths 2000-2018 |
| USA            | 2017-2017 | United States NVSS Custom Mortality Data 2017                                             |
| USA            | 2017-2017 | United States NVSS Custom Mortality Data 2017 and United States Military Deaths 2000-2018 |
| USA            | 2018-2018 | United States NVSS Custom Mortality Data 2018                                             |
| USA            | 2018-2018 | United States NVSS Custom Mortality Data 2018 and United States Military Deaths 2000-2018 |
| USA            | 2019-2019 | United States NVSS Custom Mortality Data 2019                                             |
| USA            | 2020-2020 | United States NVSS Custom Mortality Data 2020                                             |
| Zimbabwe       | 2019-2019 | Zimbabwe Multiple Indicator Cluster Survey 2019                                           |

**Appendix Table S8: Number of outlier datapoints for the age/sex model by location, source type, and age group**

| Location                     | Source | Outliers Early Neonatal (0-7 days) | Outliers Late Neonatal (7-28 days) | Outliers Post Neonatal A (1-6 months) | Outliers Post Neonatal B (6-12 months) | Outliers Post Neonatal (1-12 months) | Outliers Infant (<1 years) | Outliers Child A (1-2 years) | Outliers Child B (2-5 years) | Outliers Child (1-5 years) |
|------------------------------|--------|------------------------------------|------------------------------------|---------------------------------------|----------------------------------------|--------------------------------------|----------------------------|------------------------------|------------------------------|----------------------------|
| Afghanistan                  | DHS    | 21                                 | 21                                 | 21                                    | 21                                     | 21                                   | 21                         | 21                           | 21                           | 21                         |
| Albania                      | Other  | 114                                | 54                                 | 54                                    | 54                                     | 54                                   | 54                         | 54                           | 54                           | 54                         |
| Albania                      | LSMS   | 15                                 | 15                                 | 15                                    | 15                                     | 15                                   | 15                         | 15                           | 15                           | 15                         |
| Albania                      | DHS    | 36                                 | 21                                 | 19                                    | 21                                     | 18                                   | 18                         | 23                           | 23                           | 20                         |
| Albania                      | RHS    | 12                                 | 4                                  | 3                                     | 3                                      | 3                                    | 3                          | 3                            | 4                            | 3                          |
| Albania                      | VR     | 3                                  | 3                                  | 3                                     | 3                                      | 3                                    | 3                          | 3                            | 3                            | 3                          |
| Algeria                      | Other  | 45                                 | 45                                 | 45                                    | 45                                     | 45                                   | 45                         | 45                           | 45                           | 45                         |
| Algeria                      | PAPFAM | 9                                  | 9                                  | 9                                     | 9                                      | 9                                    | 9                          | 9                            | 9                            | 9                          |
| Algeria                      | MICS   | 9                                  | 9                                  | 9                                     | 9                                      | 9                                    | 9                          | 9                            | 9                            | 9                          |
| American Samoa               | Other  | 9                                  | 9                                  | 9                                     | 9                                      | 9                                    | 9                          | 9                            | 9                            | 14                         |
| Andorra                      | Other  | 18                                 | 18                                 | 18                                    | 18                                     | 18                                   | 24                         | 18                           | 18                           | 23                         |
| Angola                       | Other  | 9                                  | 9                                  | 9                                     | 9                                      | 9                                    | 9                          | 9                            | 9                            | 9                          |
| Angola                       | DHS    | 9                                  | 9                                  | 9                                     | 9                                      | 9                                    | 9                          | 9                            | 9                            | 9                          |
| Antigua and Barbuda          | Other  | 44                                 | 53                                 | 39                                    | 39                                     | 42                                   | 39                         | 39                           | 39                           | 44                         |
| Argentina                    | Other  | 9                                  | 9                                  | 9                                     | 9                                      | 9                                    | 9                          | 9                            | 9                            | 9                          |
| Armenia                      | MICS   | 9                                  | 9                                  | 9                                     | 9                                      | 9                                    | 9                          | 9                            | 9                            | 9                          |
| Armenia                      | DHS    | 27                                 | 27                                 | 27                                    | 27                                     | 27                                   | 33                         | 30                           | 30                           | 28                         |
| Armenia                      | Other  | 117                                | 117                                | 117                                   | 117                                    | 117                                  | 117                        | 117                          | 117                          | 117                        |
| Australia                    | Other  | 0                                  | 0                                  | 0                                     | 0                                      | 0                                    | 0                          | 0                            | 1                            | 0                          |
| Azerbaijan                   | MICS   | 9                                  | 9                                  | 9                                     | 9                                      | 9                                    | 9                          | 9                            | 9                            | 9                          |
| Azerbaijan                   | DHS    | 9                                  | 9                                  | 9                                     | 9                                      | 9                                    | 9                          | 9                            | 9                            | 9                          |
| Azerbaijan                   | Other  | 111                                | 111                                | 111                                   | 111                                    | 111                                  | 111                        | 111                          | 111                          | 111                        |
| Azerbaijan                   | VR     | 3                                  | 3                                  | 3                                     | 3                                      | 3                                    | 3                          | 3                            | 3                            | 3                          |
| Bahrain                      | Other  | 3                                  | 3                                  | 3                                     | 3                                      | 3                                    | 3                          | 3                            | 3                            | 3                          |
| Bangladesh                   | WFS    | 6                                  | 6                                  | 6                                     | 6                                      | 6                                    | 6                          | 6                            | 6                            | 6                          |
| Bangladesh                   | DHS    | 90                                 | 90                                 | 90                                    | 90                                     | 90                                   | 90                         | 90                           | 90                           | 90                         |
| Bangladesh                   | Other  | 18                                 | 18                                 | 18                                    | 18                                     | 18                                   | 18                         | 18                           | 18                           | 18                         |
| Barbados                     | Other  | 3                                  | 3                                  | 3                                     | 3                                      | 3                                    | 3                          | 3                            | 3                            | 8                          |
| Belarus                      | MICS   | 3                                  | 3                                  | 3                                     | 3                                      | 3                                    | 3                          | 3                            | 3                            | 3                          |
| Belarus                      | Other  | 90                                 | 90                                 | 90                                    | 90                                     | 90                                   | 90                         | 90                           | 90                           | 90                         |
| Belarus                      | VR     | 2                                  | 2                                  | 2                                     | 2                                      | 2                                    | 2                          | 2                            | 2                            | 2                          |
| Belgium                      | Other  | 3                                  | 3                                  | 3                                     | 3                                      | 3                                    | 3                          | 3                            | 8                            | 3                          |
| Belize                       | RHS    | 15                                 | 18                                 | 15                                    | 15                                     | 15                                   | 15                         | 17                           | 15                           | 15                         |
| Benin                        | WFS    | 9                                  | 9                                  | 9                                     | 9                                      | 9                                    | 9                          | 9                            | 9                            | 9                          |
| Benin                        | DHS    | 45                                 | 45                                 | 45                                    | 45                                     | 45                                   | 45                         | 45                           | 45                           | 45                         |
| Bermuda                      | Other  | 77                                 | 93                                 | 72                                    | 72                                     | 86                                   | 77                         | 72                           | 72                           | 95                         |
| Bhutan                       | Other  | 3                                  | 3                                  | 3                                     | 3                                      | 3                                    | 3                          | 3                            | 3                            | 3                          |
| Bolivia                      | Other  | 66                                 | 66                                 | 66                                    | 66                                     | 66                                   | 66                         | 66                           | 66                           | 66                         |
| Bolivia                      | DHS    | 54                                 | 54                                 | 45                                    | 45                                     | 45                                   | 45                         | 45                           | 45                           | 45                         |
| Bosnia and Herzegovina       | Other  | 12                                 | 12                                 | 12                                    | 12                                     | 12                                   | 12                         | 12                           | 13                           | 12                         |
| Botswana                     | DHS    | 15                                 | 6                                  | 6                                     | 6                                      | 6                                    | 6                          | 6                            | 6                            | 6                          |
| Botswana                     | Other  | 35                                 | 33                                 | 26                                    | 26                                     | 26                                   | 26                         | 26                           | 26                           | 26                         |
| Botswana                     | VR     | 15                                 | 15                                 | 15                                    | 15                                     | 15                                   | 15                         | 15                           | 15                           | 15                         |
| Brazil                       | DHS    | 24                                 | 25                                 | 24                                    | 24                                     | 24                                   | 24                         | 25                           | 25                           | 25                         |
| Brazil                       | Other  | 129                                | 129                                | 129                                   | 129                                    | 129                                  | 129                        | 129                          | 129                          | 129                        |
| Brazil - Acre                | Other  | 123                                | 123                                | 123                                   | 123                                    | 123                                  | 123                        | 123                          | 123                          | 123                        |
| Brazil - Acre                | DHS    | 9                                  | 9                                  | 9                                     | 9                                      | 9                                    | 9                          | 9                            | 9                            | 9                          |
| Brazil - Alagoas             | DHS    | 17                                 | 21                                 | 12                                    | 12                                     | 12                                   | 12                         | 17                           | 16                           | 14                         |
| Brazil - Alagoas             | Other  | 129                                | 129                                | 129                                   | 129                                    | 129                                  | 129                        | 129                          | 129                          | 129                        |
| Brazil - Amapá               | Other  | 0                                  | 0                                  | 0                                     | 2                                      | 0                                    | 0                          | 0                            | 0                            | 0                          |
| Brazil - Amapá               | DHS    | 9                                  | 9                                  | 9                                     | 9                                      | 9                                    | 9                          | 9                            | 9                            | 9                          |
| Brazil - Amazonas            | DHS    | 12                                 | 14                                 | 9                                     | 9                                      | 12                                   | 9                          | 11                           | 14                           | 11                         |
| Brazil - Bahia               | DHS    | 21                                 | 22                                 | 21                                    | 21                                     | 21                                   | 21                         | 22                           | 23                           | 21                         |
| Brazil - Bahia               | Other  | 129                                | 129                                | 129                                   | 129                                    | 129                                  | 129                        | 129                          | 129                          | 129                        |
| Brazil - Ceará               | DHS    | 15                                 | 16                                 | 15                                    | 15                                     | 15                                   | 15                         | 17                           | 21                           | 17                         |
| Brazil - Ceará               | Other  | 129                                | 129                                | 129                                   | 129                                    | 129                                  | 129                        | 129                          | 129                          | 129                        |
| Brazil - Distrito Federal    | DHS    | 18                                 | 18                                 | 18                                    | 18                                     | 18                                   | 18                         | 18                           | 18                           | 18                         |
| Brazil - Espírito Santo      | DHS    | 21                                 | 21                                 | 21                                    | 21                                     | 21                                   | 21                         | 21                           | 21                           | 21                         |
| Brazil - Espírito Santo      | Other  | 54                                 | 54                                 | 54                                    | 54                                     | 54                                   | 54                         | 54                           | 54                           | 54                         |
| Brazil - Goiás               | DHS    | 21                                 | 21                                 | 21                                    | 21                                     | 21                                   | 21                         | 21                           | 21                           | 21                         |
| Brazil - Goiás               | Other  | 111                                | 111                                | 111                                   | 111                                    | 111                                  | 111                        | 111                          | 111                          | 111                        |
| Brazil - Maranhão            | DHS    | 19                                 | 17                                 | 12                                    | 12                                     | 12                                   | 12                         | 13                           | 18                           | 12                         |
| Brazil - Maranhão            | Other  | 129                                | 129                                | 129                                   | 129                                    | 129                                  | 129                        | 129                          | 129                          | 129                        |
| Brazil - Mato Grosso         | DHS    | 13                                 | 11                                 | 9                                     | 9                                      | 10                                   | 9                          | 15                           | 11                           | 10                         |
| Brazil - Mato Grosso         | Other  | 84                                 | 84                                 | 84                                    | 84                                     | 84                                   | 84                         | 84                           | 84                           | 84                         |
| Brazil - Mato Grosso do Sul  | DHS    | 9                                  | 13                                 | 9                                     | 9                                      | 10                                   | 9                          | 16                           | 16                           | 14                         |
| Brazil - Minas Gerais        | DHS    | 12                                 | 14                                 | 12                                    | 12                                     | 13                                   | 12                         | 19                           | 14                           | 14                         |
| Brazil - Minas Gerais        | Other  | 63                                 | 63                                 | 63                                    | 63                                     | 63                                   | 63                         | 63                           | 63                           | 63                         |
| Brazil - Paraná              | DHS    | 21                                 | 21                                 | 21                                    | 21                                     | 21                                   | 21                         | 21                           | 21                           | 21                         |
| Brazil - Paraná              | Other  | 42                                 | 42                                 | 42                                    | 42                                     | 42                                   | 42                         | 42                           | 42                           | 42                         |
| Brazil - Paraíba             | DHS    | 11                                 | 14                                 | 9                                     | 9                                      | 9                                    | 9                          | 19                           | 22                           | 14                         |
| Brazil - Paraíba             | Other  | 96                                 | 96                                 | 96                                    | 96                                     | 96                                   | 96                         | 96                           | 96                           | 96                         |
| Brazil - Pará                | DHS    | 13                                 | 13                                 | 9                                     | 9                                      | 9                                    | 9                          | 10                           | 12                           | 10                         |
| Brazil - Pará                | Other  | 120                                | 120                                | 120                                   | 120                                    | 120                                  | 120                        | 120                          | 120                          | 120                        |
| Brazil - Pernambuco          | DHS    | 19                                 | 18                                 | 18                                    | 18                                     | 18                                   | 18                         | 21                           | 22                           | 19                         |
| Brazil - Pernambuco          | Other  | 90                                 | 90                                 | 90                                    | 90                                     | 90                                   | 90                         | 90                           | 90                           | 90                         |
| Brazil - Piauí               | DHS    | 21                                 | 25                                 | 21                                    | 21                                     | 21                                   | 21                         | 21                           | 25                           | 21                         |
| Brazil - Piauí               | Other  | 129                                | 129                                | 129                                   | 129                                    | 129                                  | 129                        | 129                          | 129                          | 129                        |
| Brazil - Rio Grande do Norte | DHS    | 18                                 | 17                                 | 12                                    | 12                                     | 12                                   | 12                         | 16                           | 20                           | 14                         |
| Brazil - Rio Grande do Norte | Other  | 129                                | 129                                | 129                                   | 129                                    | 129                                  | 129                        | 129                          | 129                          | 129                        |
| Brazil - Rio Grande do Sul   | DHS    | 13                                 | 16                                 | 12                                    | 12                                     | 13                                   | 12                         | 19                           | 21                           | 19                         |
| Brazil - Rio de Janeiro      | DHS    | 13                                 | 15                                 | 12                                    | 12                                     | 13                                   | 12                         | 19                           | 19                           | 17                         |
| Brazil - Rondônia            | DHS    | 12                                 | 12                                 | 12                                    | 12                                     | 12                                   | 12                         | 12                           | 12                           | 12                         |
| Brazil - Rondônia            | Other  | 69                                 | 69                                 | 69                                    | 69                                     | 69                                   | 69                         | 69                           | 69                           | 69                         |
| Brazil - Roraima             | Other  | 21                                 | 21                                 | 21                                    | 21                                     | 21                                   | 21                         | 21                           | 21                           | 21                         |
| Brazil - Roraima             | DHS    | 9                                  | 9                                  | 9                                     | 9                                      | 9                                    | 9                          | 9                            | 9                            | 9                          |
| Brazil - Santa Catarina      | DHS    | 18                                 | 18                                 | 18                                    | 18                                     | 18                                   | 18                         | 18                           | 18                           | 18                         |
| Brazil - Santa Catarina      | Other  | 45                                 | 45                                 | 45                                    | 45                                     | 45                                   | 45                         | 45                           | 45                           | 45                         |
| Brazil - Sergipe             | DHS    | 12                                 | 15                                 | 9                                     | 9                                      | 10                                   | 9                          | 17                           | 19                           | 15                         |
| Brazil - Sergipe             | Other  | 117                                | 117                                | 117                                   | 117                                    | 117                                  | 117                        | 117                          | 117                          | 117                        |
| Brazil - São Paulo           | DHS    | 15                                 | 16                                 | 15                                    | 15                                     | 15                                   | 15                         | 19                           | 22                           | 19                         |
| Brazil - Tocantins           | DHS    | 9                                  | 9                                  | 9                                     | 9                                      | 9                                    | 9                          | 9                            | 9                            | 9                          |
| Brazil - Tocantins           | Other  | 96                                 | 96                                 | 96                                    | 96                                     | 96                                   | 96                         | 96                           | 96                           | 96                         |
| Burkina Faso                 | DHS    | 36                                 | 36                                 | 36                                    | 36                                     | 36                                   | 36                         | 36                           | 36                           | 36                         |
| Burkina Faso                 | Other  | 3                                  | 3                                  | 3                                     | 3                                      | 3                                    | 3                          | 3                            | 3                            | 3                          |
| Burundi                      | DHS    | 15                                 | 15                                 | 15                                    | 15                                     | 15                                   | 15                         | 15                           | 15                           | 15                         |
| Cabo Verde                   | RHS    | 6                                  | 6                                  | 6                                     | 6                                      | 6                                    | 6                          | 6                            | 6                            | 6                          |
| Cambodia                     | DHS    | 54                                 | 54                                 | 54                                    | 54                                     | 54                                   | 54                         | 54                           | 54                           | 54                         |
| Cameroon                     | WFS    | 9                                  | 9                                  | 9                                     | 9                                      | 9                                    | 9                          | 9                            | 9                            | 9                          |
| Cameroon                     | DHS    | 39                                 | 39                                 | 39                                    | 39                                     | 39                                   | 39                         | 39                           | 39                           | 39                         |
| Central African Republic     | DHS    | 9                                  | 9                                  | 9                                     | 9                                      | 9                                    | 9                          | 9                            | 9                            | 9                          |
| Chad                         | DHS    | 30                                 | 30                                 | 30                                    | 30                                     | 30                                   | 30                         | 30                           | 30                           | 30                         |
| Chile                        | VR     | 0                                  | 0                                  | 0                                     | 3                                      | 0                                    | 0                          | 0                            | 0                            | 0                          |
| Colombia                     | Other  | 120                                | 120                                | 120                                   | 120                                    | 120                                  | 120                        | 120                          | 120                          | 120                        |

|                                        |        |     |     |     |     |     |     |     |     |     |     |
|----------------------------------------|--------|-----|-----|-----|-----|-----|-----|-----|-----|-----|-----|
| Colombia                               | WFS    | 6   | 6   | 6   | 6   | 6   | 6   | 6   | 6   | 6   | 6   |
| Colombia                               | DHS    | 57  | 57  | 57  | 57  | 57  | 57  | 57  | 57  | 57  | 57  |
| Comoros                                | DHS    | 18  | 18  | 18  | 18  | 18  | 18  | 18  | 18  | 18  | 18  |
| Congo (Brazzaville)                    | DHS    | 30  | 30  | 30  | 30  | 30  | 30  | 30  | 30  | 30  | 30  |
| Congo (Brazzaville)                    | MICS   | 9   | 9   | 9   | 9   | 9   | 9   | 9   | 9   | 9   | 9   |
| Congo (Brazzaville)                    | VR     | 3   | 3   | 3   | 3   | 3   | 3   | 3   | 3   | 3   | 3   |
| Cook Islands                           | Other  | 33  | 33  | 33  | 33  | 33  | 33  | 33  | 33  | 33  | 33  |
| Costa Rica                             | WFS    | 6   | 6   | 6   | 6   | 6   | 6   | 6   | 6   | 6   | 6   |
| Costa Rica                             | RHS    | 5   | 5   | 5   | 5   | 5   | 5   | 5   | 5   | 5   | 5   |
| Croatia                                | Other  | 3   | 3   | 3   | 3   | 3   | 3   | 3   | 3   | 3   | 3   |
| Cyprus                                 | Other  | 117 | 117 | 117 | 117 | 117 | 117 | 117 | 117 | 117 | 117 |
| Czechia                                | RHS    | 15  | 15  | 15  | 15  | 15  | 15  | 15  | 15  | 15  | 15  |
| Côte d'Ivoire                          | WFS    | 9   | 9   | 9   | 9   | 9   | 9   | 9   | 9   | 9   | 9   |
| Côte d'Ivoire                          | DHS    | 24  | 24  | 24  | 24  | 24  | 24  | 24  | 24  | 24  | 24  |
| Côte d'Ivoire                          | LSMS   | 3   | 3   | 3   | 3   | 3   | 3   | 3   | 3   | 3   | 3   |
| Côte d'Ivoire                          | Other  | 18  | 18  | 18  | 18  | 18  | 18  | 18  | 18  | 18  | 18  |
| Côte d'Ivoire                          | MICS   | 9   | 9   | 9   | 9   | 9   | 9   | 9   | 9   | 9   | 9   |
| DR Congo                               | DHS    | 21  | 21  | 21  | 21  | 21  | 21  | 21  | 21  | 21  | 21  |
| Denmark                                | Other  | 0   | 0   | 0   | 0   | 0   | 0   | 0   | 0   | 0   | 0   |
| Djibouti                               | PAPFAM | 15  | 15  | 15  | 15  | 15  | 15  | 15  | 15  | 15  | 15  |
| Dominica                               | Other  | 192 | 192 | 192 | 192 | 192 | 192 | 192 | 192 | 192 | 192 |
| Dominican Republic                     | Other  | 225 | 225 | 225 | 225 | 225 | 225 | 225 | 225 | 225 | 225 |
| Dominican Republic                     | DHS    | 66  | 66  | 66  | 66  | 66  | 66  | 66  | 66  | 66  | 66  |
| Dominican Republic                     | MICS   | 24  | 24  | 24  | 24  | 24  | 24  | 24  | 24  | 24  | 24  |
| Ecuador                                | Other  | 201 | 90  | 90  | 90  | 90  | 90  | 90  | 90  | 90  | 90  |
| Ecuador                                | DHS    | 30  | 12  | 12  | 12  | 12  | 12  | 12  | 12  | 12  | 12  |
| Ecuador                                | RHS    | 45  | 27  | 27  | 27  | 27  | 27  | 27  | 27  | 27  | 27  |
| Egypt                                  | Other  | 192 | 192 | 192 | 192 | 192 | 192 | 192 | 192 | 192 | 192 |
| Egypt                                  | WFS    | 9   | 9   | 9   | 9   | 9   | 9   | 9   | 9   | 9   | 9   |
| Egypt                                  | DHS    | 81  | 81  | 81  | 81  | 81  | 81  | 81  | 81  | 81  | 81  |
| El Salvador                            | Other  | 210 | 210 | 210 | 210 | 210 | 210 | 210 | 210 | 210 | 210 |
| El Salvador                            | RHS    | 30  | 30  | 30  | 30  | 30  | 30  | 30  | 30  | 30  | 30  |
| El Salvador                            | MICS   | 9   | 9   | 9   | 9   | 9   | 9   | 9   | 9   | 9   | 9   |
| England - Barnet                       | Other  | 0   | 0   | 0   | 0   | 0   | 0   | 0   | 0   | 0   | 0   |
| England - Barnsley                     | Other  | 3   | 3   | 3   | 3   | 3   | 3   | 3   | 3   | 3   | 3   |
| England - Bath and North East Somerset | Other  | 1   | 1   | 0   | 0   | 1   | 1   | 0   | 0   | 0   | 0   |
| England - Bedford                      | Other  | 3   | 3   | 3   | 3   | 3   | 3   | 3   | 3   | 3   | 3   |
| England - Bedford                      | Other  | 3   | 3   | 3   | 3   | 3   | 3   | 3   | 3   | 3   | 3   |
| England - Bexley                       | Other  | 0   | 0   | 0   | 0   | 0   | 0   | 0   | 0   | 0   | 0   |
| England - Blackburn with Darwen        | Other  | 0   | 0   | 0   | 0   | 0   | 0   | 0   | 0   | 0   | 0   |
| England - Blackpool                    | Other  | 0   | 0   | 0   | 0   | 0   | 0   | 0   | 0   | 0   | 0   |
| England - Bolton                       | Other  | 3   | 3   | 3   | 3   | 3   | 3   | 3   | 3   | 3   | 3   |
| England - Bournemouth                  | Other  | 3   | 3   | 3   | 3   | 3   | 3   | 3   | 3   | 3   | 3   |
| England - Bracknell Forest             | Other  | 5   | 4   | 3   | 3   | 4   | 4   | 3   | 3   | 3   | 3   |
| England - Brent                        | Other  | 3   | 3   | 3   | 3   | 3   | 3   | 3   | 3   | 3   | 3   |
| England - Brighton and Hove            | Other  | 0   | 0   | 0   | 0   | 0   | 0   | 0   | 0   | 0   | 0   |
| England - Bromley                      | Other  | 0   | 0   | 0   | 0   | 0   | 0   | 0   | 0   | 0   | 0   |
| England - Bury                         | Other  | 0   | 0   | 0   | 0   | 0   | 0   | 0   | 0   | 0   | 0   |
| England - Calderdale                   | Other  | 3   | 3   | 3   | 3   | 3   | 3   | 3   | 3   | 3   | 3   |
| England - Camden                       | Other  | 7   | 7   | 6   | 6   | 6   | 6   | 6   | 6   | 6   | 6   |
| England - Central Bedfordshire         | Other  | 3   | 3   | 3   | 3   | 3   | 3   | 3   | 3   | 3   | 3   |
| England - Cheshire East                | Other  | 0   | 0   | 0   | 0   | 0   | 0   | 0   | 0   | 0   | 0   |
| England - Cornwall                     | Other  | 3   | 3   | 3   | 3   | 3   | 3   | 3   | 3   | 3   | 3   |
| England - County Durham                | Other  | 3   | 3   | 3   | 3   | 3   | 3   | 3   | 3   | 3   | 3   |
| England - Coventry                     | Other  | 0   | 0   | 0   | 0   | 0   | 0   | 0   | 0   | 0   | 0   |
| England - Croydon                      | Other  | 0   | 0   | 0   | 0   | 0   | 0   | 0   | 0   | 0   | 0   |
| England - Cumbria                      | Other  | 0   | 0   | 0   | 0   | 0   | 0   | 0   | 0   | 0   | 0   |
| England - Darlington                   | Other  | 1   | 1   | 0   | 0   | 0   | 0   | 0   | 0   | 0   | 0   |
| England - Doncaster                    | Other  | 0   | 0   | 0   | 0   | 0   | 0   | 0   | 0   | 0   | 0   |
| England - Dorset                       | Other  | 3   | 3   | 3   | 3   | 3   | 3   | 3   | 3   | 3   | 3   |
| England - Dudley                       | Other  | 0   | 0   | 0   | 0   | 0   | 0   | 0   | 0   | 0   | 0   |
| England - Ealing                       | Other  | 4   | 4   | 3   | 3   | 3   | 3   | 3   | 3   | 3   | 3   |
| England - East Riding of Yorkshire     | Other  | 0   | 0   | 0   | 0   | 0   | 0   | 0   | 0   | 0   | 0   |
| England - East Sussex                  | Other  | 0   | 1   | 0   | 0   | 0   | 0   | 0   | 0   | 0   | 0   |
| England - Enfield                      | Other  | 0   | 0   | 0   | 0   | 0   | 0   | 0   | 0   | 0   | 0   |
| England - Gateshead                    | Other  | 3   | 3   | 3   | 3   | 3   | 3   | 3   | 3   | 3   | 3   |
| England - Hackney                      | Other  | 2   | 2   | 2   | 2   | 2   | 2   | 2   | 2   | 2   | 2   |
| England - Halton                       | Other  | 2   | 0   | 0   | 0   | 0   | 0   | 0   | 0   | 0   | 0   |
| England - Hammersmith and Fulham       | Other  | 4   | 4   | 3   | 3   | 4   | 4   | 3   | 3   | 3   | 3   |
| England - Hampshire                    | Other  | 0   | 0   | 0   | 0   | 1   | 0   | 0   | 0   | 0   | 0   |
| England - Haringey                     | Other  | 0   | 0   | 0   | 0   | 0   | 0   | 0   | 0   | 0   | 0   |
| England - Harrow                       | Other  | 3   | 3   | 3   | 3   | 3   | 3   | 3   | 3   | 3   | 3   |
| England - Hartlepool                   | Other  | 6   | 4   | 0   | 0   | 2   | 2   | 0   | 0   | 0   | 0   |
| England - Havering                     | Other  | 1   | 0   | 0   | 0   | 0   | 0   | 0   | 0   | 0   | 0   |
| England - Herefordshire, County of     | Other  | 0   | 0   | 0   | 0   | 0   | 0   | 0   | 0   | 0   | 0   |
| England - Hillingdon                   | Other  | 3   | 3   | 3   | 3   | 3   | 3   | 3   | 3   | 3   | 3   |
| England - Hounslow                     | Other  | 3   | 3   | 3   | 3   | 3   | 3   | 3   | 3   | 3   | 3   |
| England - Isle of Wight                | Other  | 3   | 3   | 3   | 3   | 3   | 3   | 3   | 3   | 3   | 3   |
| England - Islington                    | Other  | 1   | 1   | 0   | 0   | 1   | 1   | 0   | 0   | 0   | 0   |
| England - Kensington and Chelsea       | Other  | 1   | 0   | 0   | 0   | 0   | 0   | 0   | 0   | 0   | 0   |
| England - Kingston upon Hull, City of  | Other  | 0   | 0   | 0   | 0   | 0   | 0   | 0   | 0   | 0   | 0   |
| England - Kingston upon Thames         | Other  | 3   | 3   | 3   | 3   | 3   | 3   | 3   | 3   | 3   | 3   |
| England - Knowsley                     | Other  | 0   | 0   | 0   | 0   | 0   | 0   | 0   | 0   | 0   | 0   |
| England - Lambeth                      | Other  | 0   | 0   | 0   | 0   | 0   | 0   | 0   | 0   | 0   | 0   |
| England - Leicester                    | Other  | 0   | 0   | 0   | 0   | 0   | 0   | 0   | 0   | 0   | 0   |
| England - Lewisham                     | Other  | 3   | 3   | 3   | 3   | 3   | 3   | 3   | 3   | 3   | 3   |
| England - Medway                       | Other  | 3   | 3   | 3   | 3   | 3   | 3   | 3   | 3   | 3   | 3   |
| England - Merton                       | Other  | 0   | 0   | 0   | 0   | 0   | 0   | 0   | 0   | 0   | 0   |
| England - Middlesbrough                | Other  | 1   | 1   | 0   | 0   | 0   | 0   | 0   | 0   | 0   | 0   |
| England - Milton Keynes                | Other  | 3   | 3   | 3   | 3   | 3   | 3   | 3   | 3   | 3   | 3   |
| England - Newcastle upon Tyne          | Other  | 3   | 4   | 3   | 3   | 3   | 3   | 3   | 3   | 3   | 3   |
| England - North East Lincolnshire      | Other  | 1   | 1   | 0   | 0   | 0   | 0   | 0   | 0   | 0   | 0   |
| England - North Lincolnshire           | Other  | 2   | 1   | 0   | 0   | 0   | 0   | 0   | 0   | 0   | 0   |
| England - North Somerset               | Other  | 4   | 3   | 3   | 3   | 3   | 3   | 3   | 3   | 3   | 3   |
| England - North Yorkshire              | Other  | 0   | 0   | 0   | 0   | 0   | 0   | 0   | 0   | 0   | 0   |
| England - Northumberland               | Other  | 0   | 0   | 0   | 0   | 0   | 0   | 0   | 0   | 0   | 0   |
| England - Nottinghamshire              | Other  | 3   | 3   | 3   | 3   | 3   | 3   | 3   | 3   | 3   | 3   |
| England - Oxfordshire                  | Other  | 0   | 0   | 0   | 0   | 0   | 0   | 0   | 0   | 0   | 0   |
| England - Peterborough                 | Other  | 0   | 0   | 0   | 0   | 0   | 0   | 0   | 0   | 0   | 0   |
| England - Plymouth                     | Other  | 0   | 0   | 0   | 0   | 0   | 0   | 0   | 0   | 0   | 0   |
| England - Poole                        | Other  | 1   | 0   | 0   | 0   | 0   | 0   | 0   | 0   | 0   | 0   |
| England - Portsmouth                   | Other  | 4   | 3   | 3   | 3   | 3   | 3   | 3   | 3   | 3   | 3   |
| England - Reading                      | Other  | 0   | 0   | 0   | 0   | 0   | 0   | 0   | 0   | 0   | 0   |
| England - Redbridge                    | Other  | 3   | 3   | 3   | 3   | 3   | 3   | 3   | 3   | 3   | 3   |
| England - Redcar and Cleveland         | Other  | 10  | 8   | 6   | 6   | 6   | 6   | 6   | 6   | 6   | 6   |
| England - Richmond upon Thames         | Other  | 3   | 3   | 3   | 3   | 3   | 3   | 3   | 3   | 3   | 3   |
| England - Rochdale                     | Other  | 0   | 0   | 0   | 0   | 0   | 0   | 0   | 0   | 0   | 0   |
| England - Rutland                      | Other  | 3   | 3   | 0   | 0   | 3   | 3   | 0   | 0   | 0   | 0   |

|                                                         |       |     |     |     |     |     |     |     |     |     |     |
|---------------------------------------------------------|-------|-----|-----|-----|-----|-----|-----|-----|-----|-----|-----|
| England - Salford                                       | Other | 0   | 0   | 0   | 0   | 0   | 0   | 0   | 0   | 0   | 1   |
| England - Sefton                                        | Other | 3   | 3   | 3   | 3   | 3   | 3   | 3   | 3   | 3   | 3   |
| England - Shropshire                                    | Other | 0   | 0   | 0   | 0   | 0   | 0   | 0   | 0   | 0   | 2   |
| England - Solihull                                      | Other | 4   | 3   | 3   | 3   | 3   | 3   | 3   | 3   | 3   | 7   |
| England - Somerset                                      | Other | 0   | 0   | 0   | 0   | 0   | 0   | 0   | 0   | 0   | 1   |
| England - South Gloucestershire                         | Other | 0   | 0   | 0   | 0   | 0   | 0   | 0   | 0   | 0   | 2   |
| England - South Tyneside                                | Other | 8   | 7   | 6   | 6   | 7   | 7   | 6   | 6   | 6   | 9   |
| England - Southampton                                   | Other | 0   | 0   | 0   | 0   | 0   | 0   | 0   | 0   | 0   | 3   |
| England - Southend-on-Sea                               | Other | 0   | 0   | 0   | 0   | 0   | 0   | 0   | 0   | 0   | 2   |
| England - Southwark                                     | Other | 3   | 3   | 3   | 3   | 3   | 3   | 3   | 3   | 3   | 4   |
| England - St Helens                                     | Other | 1   | 0   | 0   | 0   | 0   | 0   | 0   | 0   | 0   | 2   |
| England - Staffordshire                                 | Other | 0   | 0   | 0   | 0   | 2   | 0   | 0   | 0   | 0   | 0   |
| England - Stockport                                     | Other | 3   | 3   | 3   | 3   | 3   | 3   | 3   | 3   | 3   | 3   |
| England - Stockton-on-Tees                              | Other | 6   | 6   | 6   | 6   | 6   | 6   | 6   | 6   | 6   | 8   |
| England - Suffolk                                       | Other | 0   | 0   | 0   | 0   | 0   | 0   | 0   | 0   | 0   | 1   |
| England - Sunderland                                    | Other | 4   | 3   | 3   | 3   | 3   | 3   | 3   | 3   | 3   | 5   |
| England - Sutton                                        | Other | 2   | 1   | 0   | 0   | 0   | 0   | 0   | 0   | 0   | 2   |
| England - Swindon                                       | Other | 1   | 0   | 0   | 0   | 0   | 0   | 0   | 0   | 0   | 4   |
| England - Tameside                                      | Other | 0   | 0   | 0   | 0   | 0   | 0   | 0   | 0   | 0   | 2   |
| England - Telford and Wrekin                            | Other | 1   | 1   | 0   | 0   | 0   | 0   | 0   | 0   | 0   | 2   |
| England - Thurrock                                      | Other | 3   | 4   | 3   | 3   | 3   | 3   | 3   | 3   | 3   | 3   |
| England - Torbay                                        | Other | 4   | 4   | 3   | 3   | 4   | 4   | 3   | 3   | 3   | 8   |
| England - Trafford                                      | Other | 6   | 6   | 6   | 6   | 6   | 6   | 6   | 6   | 6   | 9   |
| England - Wakefield                                     | Other | 0   | 0   | 0   | 0   | 0   | 0   | 0   | 0   | 0   | 1   |
| England - Walsall                                       | Other | 3   | 3   | 3   | 3   | 3   | 3   | 3   | 3   | 3   | 3   |
| England - Wandsworth                                    | Other | 0   | 0   | 0   | 0   | 0   | 0   | 0   | 0   | 0   | 1   |
| England - Warrington                                    | Other | 0   | 0   | 0   | 0   | 0   | 0   | 0   | 0   | 0   | 1   |
| England - West Berkshire                                | Other | 2   | 1   | 0   | 0   | 0   | 0   | 0   | 0   | 0   | 6   |
| England - Westminster                                   | Other | 1   | 0   | 0   | 0   | 0   | 0   | 0   | 0   | 0   | 4   |
| England - Wigan                                         | Other | 0   | 0   | 0   | 0   | 0   | 0   | 0   | 0   | 0   | 1   |
| England - Windsor and Maidenhead                        | Other | 4   | 4   | 3   | 3   | 3   | 3   | 3   | 3   | 3   | 7   |
| England - Wokingham                                     | Other | 4   | 4   | 3   | 3   | 4   | 4   | 3   | 3   | 3   | 7   |
| England - Wolverhampton                                 | Other | 3   | 3   | 3   | 3   | 3   | 3   | 3   | 3   | 3   | 4   |
| England - York                                          | Other | 0   | 0   | 0   | 0   | 0   | 0   | 0   | 0   | 0   | 4   |
| Eritrea                                                 | DHS   | 18  | 18  | 18  | 18  | 18  | 18  | 18  | 18  | 18  | 18  |
| Estonia                                                 | MICS  | 3   | 3   | 3   | 3   | 3   | 3   | 3   | 3   | 3   | 3   |
| Estonia                                                 | Other | 0   | 0   | 0   | 0   | 0   | 0   | 0   | 0   | 0   | 2   |
| Eswatini                                                | DHS   | 9   | 9   | 9   | 9   | 9   | 9   | 9   | 9   | 9   | 9   |
| Eswatini                                                | MICS  | 18  | 18  | 18  | 18  | 18  | 18  | 18  | 18  | 18  | 18  |
| Ethiopia                                                | DHS   | 102 | 102 | 102 | 102 | 102 | 102 | 102 | 102 | 102 | 102 |
| Ethiopia - Addis Ababa                                  | DHS   | 30  | 46  | 37  | 37  | 34  | 30  | 38  | 37  | 37  | 32  |
| Ethiopia - Afar                                         | DHS   | 27  | 29  | 27  | 27  | 27  | 27  | 27  | 27  | 27  | 27  |
| Ethiopia - Amhara                                       | DHS   | 48  | 48  | 48  | 49  | 48  | 48  | 48  | 48  | 48  | 48  |
| Ethiopia - Benishangul-Gumuz                            | DHS   | 24  | 24  | 25  | 24  | 24  | 24  | 24  | 24  | 24  | 24  |
| Ethiopia - Dire Dawa                                    | DHS   | 21  | 24  | 21  | 23  | 21  | 21  | 24  | 21  | 21  | 21  |
| Ethiopia - Gambella                                     | DHS   | 21  | 23  | 21  | 22  | 21  | 21  | 22  | 21  | 21  | 21  |
| Ethiopia - Harari                                       | DHS   | 24  | 26  | 24  | 27  | 24  | 24  | 24  | 24  | 25  | 24  |
| Ethiopia - Oromia                                       | DHS   | 42  | 42  | 42  | 42  | 42  | 42  | 42  | 42  | 42  | 42  |
| Ethiopia - Somali                                       | DHS   | 21  | 21  | 21  | 21  | 21  | 21  | 21  | 21  | 21  | 21  |
| Ethiopia - Southern Nations, Nationalities, and Peoples | DHS   | 36  | 36  | 36  | 36  | 36  | 36  | 36  | 36  | 36  | 36  |
| Ethiopia - Tigray                                       | DHS   | 37  | 36  | 37  | 37  | 36  | 36  | 37  | 37  | 37  | 36  |
| Fiji                                                    | Other | 162 | 162 | 162 | 162 | 162 | 162 | 162 | 162 | 162 | 162 |
| Fiji                                                    | WFS   | 15  | 15  | 15  | 15  | 15  | 15  | 15  | 15  | 15  | 15  |
| Gabon                                                   | DHS   | 18  | 20  | 18  | 18  | 18  | 18  | 18  | 18  | 18  | 18  |
| Georgia                                                 | MICS  | 6   | 6   | 6   | 6   | 6   | 6   | 6   | 6   | 6   | 6   |
| Georgia                                                 | RHS   | 12  | 12  | 12  | 12  | 12  | 12  | 12  | 12  | 12  | 12  |
| Georgia                                                 | Other | 60  | 60  | 60  | 60  | 60  | 60  | 60  | 60  | 60  | 60  |
| Germany                                                 | Other | 0   | 0   | 0   | 0   | 0   | 0   | 0   | 0   | 0   | 1   |
| Ghana                                                   | WFS   | 9   | 9   | 9   | 9   | 9   | 9   | 9   | 9   | 9   | 9   |
| Ghana                                                   | DHS   | 75  | 84  | 75  | 75  | 75  | 75  | 75  | 75  | 75  | 75  |
| Ghana                                                   | MICS  | 18  | 18  | 18  | 18  | 18  | 18  | 18  | 18  | 18  | 18  |
| Ghana                                                   | Other | 6   | 6   | 6   | 6   | 6   | 6   | 6   | 6   | 6   | 6   |
| Ghana                                                   | VR    | 3   | 3   | 3   | 3   | 3   | 3   | 3   | 3   | 3   | 3   |
| Greenland                                               | Other | 27  | 27  | 27  | 27  | 27  | 27  | 27  | 27  | 27  | 29  |
| Greenland                                               | VR    | 3   | 3   | 3   | 3   | 3   | 3   | 3   | 3   | 3   | 3   |
| Grenada                                                 | Other | 12  | 30  | 12  | 12  | 13  | 12  | 12  | 12  | 12  | 17  |
| Guam                                                    | Other | 0   | 0   | 0   | 0   | 0   | 0   | 0   | 0   | 0   | 1   |
| Guam                                                    | VR    | 6   | 6   | 6   | 6   | 6   | 6   | 6   | 6   | 6   | 6   |
| Guatemala                                               | Other | 3   | 3   | 3   | 3   | 3   | 3   | 3   | 3   | 3   | 3   |
| Guatemala                                               | DHS   | 24  | 24  | 24  | 24  | 24  | 24  | 24  | 24  | 24  | 24  |
| Guatemala                                               | RHS   | 18  | 18  | 18  | 18  | 18  | 18  | 18  | 18  | 18  | 18  |
| Guinea                                                  | DHS   | 27  | 27  | 27  | 27  | 27  | 27  | 27  | 27  | 27  | 27  |
| Guinea                                                  | MICS  | 9   | 9   | 9   | 9   | 9   | 9   | 9   | 9   | 9   | 9   |
| Guinea                                                  | VR    | 3   | 3   | 3   | 3   | 3   | 3   | 3   | 3   | 3   | 3   |
| Guinea-Bissau                                           | MICS  | 18  | 18  | 18  | 18  | 18  | 18  | 18  | 18  | 18  | 18  |
| Guyana                                                  | Other | 156 | 156 | 156 | 156 | 156 | 156 | 156 | 156 | 156 | 156 |
| Guyana                                                  | WFS   | 6   | 6   | 6   | 6   | 6   | 6   | 6   | 6   | 6   | 6   |
| Guyana                                                  | DHS   | 9   | 9   | 9   | 9   | 9   | 9   | 13  | 10  | 10  | 10  |
| Guyana                                                  | MICS  | 9   | 9   | 9   | 9   | 9   | 9   | 9   | 9   | 9   | 9   |
| Haiti                                                   | WFS   | 6   | 6   | 6   | 6   | 6   | 6   | 6   | 6   | 6   | 6   |
| Haiti                                                   | DHS   | 45  | 45  | 45  | 45  | 45  | 45  | 45  | 45  | 45  | 45  |
| Haiti                                                   | Other | 21  | 21  | 21  | 21  | 21  | 21  | 21  | 21  | 21  | 21  |
| Honduras                                                | Other | 126 | 126 | 126 | 126 | 126 | 126 | 126 | 126 | 126 | 126 |
| Honduras                                                | RHS   | 18  | 18  | 18  | 18  | 18  | 18  | 18  | 18  | 18  | 18  |
| Honduras                                                | DHS   | 21  | 21  | 21  | 21  | 21  | 21  | 21  | 21  | 21  | 21  |
| Hungary                                                 | Other | 0   | 0   | 0   | 0   | 0   | 0   | 0   | 0   | 0   | 1   |
| Iceland                                                 | Other | 6   | 30  | 0   | 0   | 10  | 0   | 0   | 0   | 0   | 14  |
| Iceland                                                 | VR    | 3   | 3   | 3   | 3   | 3   | 3   | 3   | 3   | 3   | 4   |
| India                                                   | Other | 174 | 174 | 174 | 174 | 174 | 174 | 174 | 174 | 174 | 174 |
| India                                                   | DHS   | 48  | 48  | 48  | 48  | 48  | 48  | 48  | 48  | 48  | 48  |
| Indonesia                                               | Other | 63  | 63  | 63  | 63  | 63  | 63  | 63  | 63  | 63  | 63  |
| Indonesia                                               | WFS   | 6   | 6   | 6   | 6   | 6   | 6   | 6   | 6   | 6   | 6   |
| Indonesia                                               | DHS   | 96  | 96  | 96  | 96  | 96  | 96  | 96  | 96  | 96  | 96  |
| Indonesia - Aceh                                        | DHS   | 6   | 6   | 6   | 8   | 6   | 6   | 10  | 7   | 7   | 7   |
| Indonesia - Bali                                        | DHS   | 4   | 9   | 4   | 12  | 4   | 4   | 12  | 8   | 8   | 8   |
| Indonesia - Bangka-Belitung Islands                     | DHS   | 4   | 6   | 4   | 5   | 3   | 3   | 8   | 4   | 3   | 3   |
| Indonesia - Banten                                      | DHS   | 6   | 6   | 7   | 8   | 6   | 6   | 8   | 8   | 7   | 7   |
| Indonesia - Bengkulu                                    | DHS   | 3   | 7   | 8   | 5   | 3   | 3   | 8   | 7   | 7   | 7   |
| Indonesia - Central Java                                | DHS   | 9   | 9   | 12  | 10  | 10  | 9   | 11  | 10  | 10  | 10  |
| Indonesia - Central Kalimantan                          | DHS   | 3   | 12  | 5   | 10  | 5   | 3   | 6   | 7   | 4   | 4   |
| Indonesia - Central Sulawesi                            | DHS   | 7   | 11  | 7   | 8   | 6   | 6   | 11  | 8   | 6   | 6   |
| Indonesia - East Java                                   | DHS   | 9   | 9   | 9   | 10  | 9   | 9   | 10  | 9   | 9   | 9   |
| Indonesia - East Kalimantan                             | DHS   | 4   | 4   | 5   | 9   | 4   | 3   | 10  | 6   | 6   | 6   |
| Indonesia - East Nusa Tenggara                          | DHS   | 6   | 8   | 6   | 6   | 6   | 6   | 7   | 6   | 6   | 6   |
| Indonesia - Gorontalo                                   | DHS   | 3   | 10  | 3   | 3   | 3   | 3   | 9   | 5   | 5   | 5   |
| Indonesia - Jakarta                                     | DHS   | 6   | 11  | 9   | 9   | 9   | 6   | 9   | 8   | 7   | 7   |
| Indonesia - Jambi                                       | DHS   | 3   | 5   | 10  | 8   | 6   | 3   | 12  | 10  | 10  | 10  |

|                                       |       |     |     |     |     |     |     |     |     |     |
|---------------------------------------|-------|-----|-----|-----|-----|-----|-----|-----|-----|-----|
| Indonesia - Lampung                   | DHS   | 6   | 8   | 7   | 13  | 7   | 6   | 12  | 8   | 7   |
| Indonesia - Maluku                    | DHS   | 6   | 8   | 6   | 6   | 6   | 6   | 7   | 7   | 6   |
| Indonesia - North Kalimantan          | DHS   | 4   | 6   | 3   | 7   | 3   | 3   | 8   | 10  | 8   |
| Indonesia - North Maluku              | DHS   | 6   | 8   | 6   | 6   | 6   | 6   | 6   | 7   | 6   |
| Indonesia - North Sulawesi            | DHS   | 1   | 5   | 5   | 4   | 4   | 0   | 5   | 7   | 4   |
| Indonesia - North Sumatra             | DHS   | 6   | 6   | 6   | 6   | 6   | 6   | 8   | 7   | 6   |
| Indonesia - Papua                     | DHS   | 0   | 6   | 0   | 2   | 0   | 0   | 0   | 0   | 0   |
| Indonesia - Riau                      | DHS   | 3   | 8   | 4   | 5   | 4   | 3   | 8   | 6   | 5   |
| Indonesia - Riau Islands              | DHS   | 4   | 8   | 10  | 8   | 8   | 3   | 8   | 6   | 6   |
| Indonesia - South Kalimantan          | DHS   | 3   | 5   | 7   | 10  | 7   | 3   | 7   | 8   | 4   |
| Indonesia - South Sulawesi            | DHS   | 6   | 8   | 7   | 7   | 6   | 6   | 11  | 6   | 6   |
| Indonesia - South Sumatra             | DHS   | 6   | 12  | 7   | 7   | 7   | 6   | 12  | 11  | 10  |
| Indonesia - Southeast Sulawesi        | DHS   | 6   | 6   | 6   | 7   | 6   | 6   | 8   | 6   | 6   |
| Indonesia - West Java                 | DHS   | 9   | 9   | 9   | 9   | 9   | 9   | 9   | 9   | 9   |
| Indonesia - West Kalimantan           | DHS   | 5   | 7   | 5   | 10  | 4   | 3   | 6   | 6   | 6   |
| Indonesia - West Nusa Tenggara        | DHS   | 7   | 7   | 7   | 7   | 6   | 6   | 9   | 9   | 7   |
| Indonesia - West Papua                | DHS   | 3   | 1   | 1   | 5   | 1   | 0   | 0   | 2   | 0   |
| Indonesia - West Sulawesi             | DHS   | 6   | 7   | 6   | 6   | 6   | 6   | 6   | 6   | 6   |
| Indonesia - West Sumatra              | DHS   | 3   | 8   | 6   | 8   | 4   | 3   | 7   | 8   | 5   |
| Indonesia - Yogyakarta                | DHS   | 4   | 9   | 5   | 9   | 5   | 1   | 7   | 9   | 7   |
| Iran                                  | Other | 108 | 108 | 108 | 108 | 108 | 108 | 108 | 108 | 108 |
| Iran - Alborz                         | Other | 42  | 42  | 42  | 42  | 42  | 42  | 42  | 42  | 42  |
| Iran - Ardebil                        | Other | 42  | 42  | 42  | 42  | 42  | 42  | 42  | 42  | 42  |
| Iran - Bushehr                        | Other | 21  | 21  | 21  | 21  | 21  | 21  | 21  | 21  | 21  |
| Iran - Chaharmahal and Bakhtiari      | Other | 27  | 27  | 27  | 27  | 27  | 27  | 27  | 27  | 27  |
| Iran - East Azarbaijan                | Other | 39  | 39  | 39  | 39  | 39  | 39  | 39  | 39  | 39  |
| Iran - Fars                           | Other | 36  | 36  | 36  | 36  | 36  | 36  | 36  | 36  | 36  |
| Iran - Gilan                          | Other | 30  | 30  | 30  | 30  | 30  | 30  | 30  | 30  | 30  |
| Iran - Golestan                       | Other | 42  | 42  | 42  | 42  | 42  | 42  | 42  | 42  | 42  |
| Iran - Hamadan                        | Other | 36  | 36  | 36  | 36  | 36  | 36  | 36  | 36  | 36  |
| Iran - Hormozgan                      | Other | 33  | 33  | 33  | 33  | 33  | 33  | 33  | 33  | 33  |
| Iran - Ilam                           | Other | 39  | 39  | 39  | 39  | 39  | 39  | 39  | 39  | 39  |
| Iran - Isfahan                        | Other | 39  | 39  | 39  | 39  | 39  | 39  | 39  | 39  | 39  |
| Iran - Kerman                         | Other | 42  | 42  | 42  | 42  | 42  | 42  | 42  | 42  | 42  |
| Iran - Kermanshah                     | Other | 33  | 33  | 33  | 33  | 33  | 33  | 33  | 33  | 33  |
| Iran - Khorasan-e-Razavi              | Other | 36  | 36  | 36  | 36  | 36  | 36  | 36  | 36  | 36  |
| Iran - Khuzestan                      | Other | 42  | 42  | 42  | 42  | 42  | 42  | 42  | 42  | 42  |
| Iran - Kohgiluyeh and Boyer-Ahmad     | Other | 39  | 39  | 39  | 39  | 39  | 39  | 39  | 39  | 39  |
| Iran - Kurdistan                      | Other | 42  | 42  | 42  | 42  | 42  | 42  | 42  | 42  | 42  |
| Iran - Lorestan                       | Other | 36  | 36  | 36  | 36  | 36  | 36  | 36  | 36  | 36  |
| Iran - Markazi                        | Other | 27  | 27  | 27  | 27  | 27  | 27  | 27  | 27  | 27  |
| Iran - Mazandaran                     | Other | 39  | 39  | 39  | 39  | 39  | 39  | 39  | 39  | 39  |
| Iran - North Khorasan                 | Other | 42  | 42  | 42  | 42  | 42  | 42  | 42  | 42  | 42  |
| Iran - Qazvin                         | Other | 42  | 42  | 42  | 42  | 42  | 42  | 42  | 42  | 42  |
| Iran - Qom                            | Other | 15  | 15  | 15  | 15  | 15  | 15  | 15  | 15  | 15  |
| Iran - Sistan and Baluchistan         | Other | 42  | 42  | 42  | 42  | 42  | 42  | 42  | 42  | 42  |
| Iran - South Khorasan                 | Other | 33  | 33  | 33  | 33  | 33  | 33  | 33  | 33  | 33  |
| Iran - Tehran                         | Other | 12  | 12  | 12  | 12  | 12  | 12  | 12  | 12  | 12  |
| Iran - West Azarbaijan                | Other | 39  | 39  | 39  | 39  | 39  | 39  | 39  | 39  | 39  |
| Iran - Yazd                           | Other | 21  | 21  | 21  | 21  | 21  | 21  | 21  | 21  | 21  |
| Iran - Zanjan                         | Other | 42  | 42  | 42  | 42  | 42  | 42  | 42  | 42  | 42  |
| Iraq                                  | Other | 90  | 90  | 90  | 90  | 90  | 90  | 90  | 90  | 90  |
| Iraq                                  | MICS  | 51  | 51  | 51  | 51  | 51  | 51  | 51  | 51  | 51  |
| Ireland                               | Other | 3   | 3   | 3   | 3   | 3   | 3   | 3   | 5   | 3   |
| Italy - Abruzzo                       | Other | 0   | 0   | 0   | 0   | 0   | 0   | 0   | 0   | 3   |
| Italy - Abruzzo                       | VR    | 0   | 0   | 0   | 0   | 0   | 0   | 0   | 0   | 1   |
| Italy - Basilicata                    | Other | 6   | 6   | 6   | 6   | 6   | 6   | 6   | 6   | 17  |
| Italy - Basilicata                    | VR    | 3   | 3   | 3   | 3   | 3   | 3   | 3   | 3   | 3   |
| Italy - Friuli-Venezia Giulia         | Other | 0   | 0   | 0   | 0   | 1   | 0   | 0   | 0   | 4   |
| Italy - Liguria                       | Other | 0   | 0   | 0   | 0   | 0   | 0   | 0   | 0   | 1   |
| Italy - Molise                        | Other | 6   | 6   | 6   | 6   | 6   | 6   | 6   | 6   | 20  |
| Italy - Molise                        | VR    | 0   | 0   | 0   | 0   | 0   | 1   | 0   | 0   | 0   |
| Italy - Provincia autonoma di Bolzano | Other | 0   | 0   | 0   | 0   | 0   | 0   | 0   | 0   | 14  |
| Italy - Provincia autonoma di Trento  | Other | 0   | 1   | 0   | 0   | 0   | 0   | 0   | 0   | 10  |
| Italy - Puglia                        | VR    | 0   | 0   | 0   | 0   | 0   | 0   | 0   | 0   | 1   |
| Italy - Umbria                        | Other | 3   | 3   | 3   | 3   | 3   | 3   | 3   | 3   | 12  |
| Italy - Umbria                        | VR    | 3   | 3   | 3   | 3   | 3   | 3   | 3   | 3   | 3   |
| Italy - Valle d'Aosta                 | Other | 21  | 21  | 21  | 21  | 21  | 21  | 21  | 21  | 61  |
| Italy - Valle d'Aosta                 | VR    | 3   | 3   | 3   | 3   | 3   | 3   | 3   | 3   | 3   |
| Jamaica                               | Other | 69  | 69  | 69  | 69  | 69  | 69  | 69  | 69  | 69  |
| Jamaica                               | WFS   | 6   | 6   | 6   | 6   | 6   | 6   | 6   | 6   | 6   |
| Jamaica                               | VR    | 6   | 6   | 6   | 6   | 6   | 6   | 6   | 6   | 6   |
| Japan                                 | Other | 3   | 3   | 3   | 3   | 3   | 3   | 3   | 5   | 3   |
| Japan - Aichi                         | Other | 0   | 0   | 0   | 0   | 0   | 0   | 0   | 8   | 0   |
| Japan - Aomori                        | Other | 0   | 0   | 0   | 0   | 0   | 0   | 0   | 6   | 0   |
| Japan - Chiba                         | Other | 0   | 0   | 0   | 0   | 0   | 0   | 0   | 6   | 0   |
| Japan - Ehime                         | Other | 0   | 0   | 0   | 0   | 0   | 0   | 0   | 1   | 0   |
| Japan - Fukui                         | Other | 0   | 0   | 0   | 0   | 0   | 0   | 0   | 2   | 0   |
| Japan - Fukuoka                       | Other | 0   | 2   | 0   | 0   | 0   | 0   | 0   | 5   | 0   |
| Japan - Fukushima                     | Other | 0   | 3   | 0   | 0   | 0   | 0   | 0   | 5   | 0   |
| Japan - Gifu                          | Other | 0   | 0   | 0   | 0   | 0   | 0   | 0   | 6   | 0   |
| Japan - Gunma                         | Other | 0   | 0   | 0   | 0   | 0   | 0   | 0   | 3   | 0   |
| Japan - Hiroshima                     | Other | 0   | 1   | 0   | 0   | 0   | 0   | 1   | 3   | 0   |
| Japan - Hokkaido                      | Other | 0   | 0   | 0   | 0   | 0   | 0   | 0   | 7   | 0   |
| Japan - Hyogo                         | Other | 3   | 4   | 3   | 3   | 3   | 3   | 3   | 8   | 3   |
| Japan - Ibaraki                       | Other | 0   | 3   | 0   | 0   | 0   | 0   | 3   | 5   | 0   |
| Japan - Ishikawa                      | Other | 0   | 0   | 0   | 0   | 0   | 0   | 0   | 1   | 0   |
| Japan - Iwate                         | Other | 1   | 1   | 1   | 1   | 1   | 1   | 1   | 4   | 1   |
| Japan - Kagawa                        | Other | 0   | 0   | 0   | 0   | 0   | 0   | 0   | 1   | 0   |
| Japan - Kagoshima                     | Other | 0   | 0   | 0   | 0   | 0   | 0   | 0   | 2   | 0   |
| Japan - Kanagawa                      | Other | 0   | 0   | 0   | 0   | 0   | 0   | 0   | 8   | 0   |
| Japan - Kumamoto                      | Other | 0   | 0   | 0   | 0   | 0   | 0   | 0   | 5   | 0   |
| Japan - Kyoto                         | Other | 0   | 4   | 0   | 0   | 0   | 0   | 1   | 3   | 0   |
| Japan - Mie                           | Other | 0   | 0   | 0   | 0   | 0   | 0   | 0   | 3   | 0   |
| Japan - Miyagi                        | Other | 3   | 4   | 3   | 3   | 3   | 3   | 3   | 8   | 3   |
| Japan - Miyazaki                      | Other | 0   | 0   | 0   | 0   | 0   | 0   | 0   | 4   | 0   |
| Japan - Nagano                        | Other | 0   | 2   | 0   | 0   | 0   | 0   | 0   | 1   | 0   |
| Japan - Nagasaki                      | Other | 0   | 0   | 0   | 0   | 0   | 0   | 0   | 2   | 0   |
| Japan - Nara                          | Other | 0   | 0   | 0   | 0   | 0   | 0   | 0   | 2   | 0   |
| Japan - Niigata                       | Other | 0   | 0   | 0   | 0   | 0   | 0   | 0   | 9   | 0   |
| Japan - Okayama                       | Other | 0   | 0   | 0   | 0   | 0   | 0   | 0   | 3   | 0   |
| Japan - Okinawa                       | Other | 0   | 0   | 0   | 0   | 0   | 0   | 0   | 5   | 0   |
| Japan - Saga                          | Other | 0   | 0   | 0   | 0   | 0   | 0   | 0   | 1   | 0   |
| Japan - Saitama                       | Other | 0   | 1   | 0   | 0   | 0   | 0   | 0   | 11  | 0   |
| Japan - Shiga                         | Other | 0   | 0   | 0   | 0   | 0   | 0   | 0   | 4   | 0   |
| Japan - Shizuoka                      | Other | 0   | 2   | 0   | 0   | 0   | 0   | 0   | 10  | 0   |
| Japan - Tochigi                       | Other | 0   | 0   | 0   | 0   | 0   | 0   | 0   | 6   | 0   |



|                         |        |    |    |    |    |    |    |    |    |    |
|-------------------------|--------|----|----|----|----|----|----|----|----|----|
| Japan - Tottori         | Other  | 3  | 3  | 3  | 3  | 3  | 3  | 3  | 3  | 3  |
| Japan - Toyama          | Other  | 0  | 0  | 0  | 0  | 0  | 0  | 0  | 3  | 0  |
| Japan - Tōkyō           | Other  | 0  | 0  | 0  | 0  | 0  | 0  | 0  | 6  | 0  |
| Japan - Wakayama        | Other  | 0  | 0  | 0  | 0  | 0  | 0  | 0  | 1  | 0  |
| Japan - Yamagata        | Other  | 0  | 0  | 0  | 0  | 0  | 0  | 0  | 1  | 0  |
| Japan - Yamaguchi       | Other  | 3  | 3  | 3  | 3  | 3  | 3  | 3  | 3  | 3  |
| Japan - Ōita            | Other  | 0  | 0  | 0  | 0  | 0  | 0  | 0  | 3  | 0  |
| Japan - Ōsaka           | Other  | 0  | 0  | 0  | 0  | 0  | 0  | 0  | 4  | 0  |
| Jordan                  | DHS    | 63 | 63 | 63 | 63 | 63 | 63 | 63 | 63 | 63 |
| Jordan                  | Other  | 75 | 75 | 75 | 75 | 75 | 75 | 75 | 75 | 75 |
| Kazakhstan              | MICS   | 3  | 3  | 3  | 3  | 3  | 3  | 3  | 3  | 3  |
| Kazakhstan              | DHS    | 21 | 21 | 21 | 21 | 21 | 21 | 22 | 22 | 21 |
| Kazakhstan              | Other  | 36 | 38 | 36 | 36 | 36 | 36 | 36 | 36 | 36 |
| Kenya                   | WFS    | 9  | 9  | 9  | 9  | 9  | 9  | 9  | 9  | 9  |
| Kenya                   | DHS    | 57 | 57 | 57 | 57 | 57 | 57 | 57 | 57 | 57 |
| Kenya                   | Other  | 3  | 3  | 3  | 3  | 3  | 3  | 3  | 3  | 3  |
| Kenya                   | VR     | 3  | 3  | 3  | 3  | 3  | 3  | 3  | 3  | 3  |
| Kenya - Baringo         | DHS    | 3  | 4  | 3  | 3  | 4  | 3  | 8  | 5  | 4  |
| Kenya - Bomet           | DHS    | 13 | 19 | 12 | 12 | 14 | 12 | 15 | 19 | 13 |
| Kenya - Bungoma         | DHS    | 14 | 17 | 6  | 6  | 7  | 6  | 11 | 9  | 6  |
| Kenya - Busia           | DHS    | 35 | 44 | 33 | 33 | 34 | 33 | 39 | 41 | 37 |
| Kenya - Elgeyo Marakwet | DHS    | 37 | 46 | 36 | 36 | 38 | 36 | 48 | 47 | 44 |
| Kenya - Embu            | DHS    | 49 | 55 | 48 | 48 | 48 | 48 | 50 | 50 | 49 |
| Kenya - Embu            | MICS   | 6  | 6  | 6  | 6  | 6  | 6  | 6  | 6  | 6  |
| Kenya - Garissa         | DHS    | 1  | 10 | 0  | 0  | 4  | 0  | 8  | 4  | 2  |
| Kenya - Homa Bay        | MICS   | 6  | 6  | 6  | 6  | 6  | 6  | 6  | 6  | 6  |
| Kenya - Homa Bay        | DHS    | 8  | 13 | 6  | 6  | 6  | 6  | 7  | 6  | 6  |
| Kenya - Isiolo          | DHS    | 21 | 22 | 21 | 21 | 21 | 21 | 23 | 25 | 23 |
| Kenya - Isiolo          | MICS   | 3  | 4  | 3  | 3  | 3  | 3  | 5  | 4  | 3  |
| Kenya - Kajiado         | DHS    | 49 | 55 | 39 | 39 | 45 | 43 | 51 | 49 | 45 |
| Kenya - Kakamega        | DHS    | 14 | 23 | 9  | 9  | 9  | 9  | 10 | 9  | 9  |
| Kenya - Kericho         | DHS    | 20 | 34 | 18 | 18 | 19 | 18 | 43 | 25 | 23 |
| Kenya - Kiambu          | DHS    | 33 | 44 | 30 | 30 | 32 | 30 | 45 | 42 | 38 |
| Kenya - Kilifi          | DHS    | 19 | 32 | 18 | 18 | 19 | 18 | 24 | 25 | 20 |
| Kenya - Kirinyaga       | DHS    | 32 | 46 | 30 | 30 | 39 | 32 | 38 | 44 | 34 |
| Kenya - Kisii           | DHS    | 17 | 29 | 15 | 15 | 19 | 16 | 23 | 18 | 16 |
| Kenya - Kisii           | MICS   | 6  | 7  | 6  | 6  | 6  | 6  | 6  | 6  | 6  |
| Kenya - Kisumu          | DHS    | 11 | 23 | 3  | 3  | 3  | 3  | 8  | 7  | 4  |
| Kenya - Kisumu          | MICS   | 6  | 9  | 6  | 6  | 6  | 6  | 6  | 6  | 6  |
| Kenya - Kitui           | MICS   | 12 | 12 | 12 | 12 | 12 | 12 | 12 | 12 | 12 |
| Kenya - Kitui           | DHS    | 22 | 46 | 15 | 15 | 20 | 16 | 31 | 29 | 25 |
| Kenya - Kwale           | DHS    | 12 | 34 | 3  | 3  | 11 | 5  | 26 | 19 | 13 |
| Kenya - Laikipia        | DHS    | 48 | 48 | 48 | 48 | 49 | 48 | 52 | 51 | 51 |
| Kenya - Lamu            | DHS    | 24 | 27 | 23 | 23 | 23 | 23 | 27 | 26 | 24 |
| Kenya - Machakos        | DHS    | 30 | 37 | 30 | 30 | 32 | 30 | 44 | 35 | 34 |
| Kenya - Machakos        | MICS   | 6  | 9  | 6  | 6  | 7  | 6  | 7  | 6  | 6  |
| Kenya - Makeni          | DHS    | 25 | 27 | 24 | 24 | 25 | 24 | 29 | 25 | 25 |
| Kenya - Makeni          | MICS   | 6  | 6  | 6  | 6  | 6  | 6  | 8  | 6  | 6  |
| Kenya - Mandera         | DHS    | 11 | 17 | 3  | 3  | 5  | 3  | 19 | 7  | 7  |
| Kenya - Marsabit        | MICS   | 21 | 21 | 21 | 21 | 21 | 21 | 21 | 21 | 21 |
| Kenya - Marsabit        | DHS    | 21 | 24 | 21 | 21 | 22 | 21 | 25 | 24 | 22 |
| Kenya - Meru            | DHS    | 7  | 37 | 6  | 6  | 15 | 6  | 35 | 17 | 14 |
| Kenya - Meru            | MICS   | 9  | 9  | 9  | 9  | 9  | 9  | 10 | 9  | 9  |
| Kenya - Migori          | DHS    | 5  | 13 | 3  | 3  | 3  | 3  | 4  | 6  | 3  |
| Kenya - Migori          | MICS   | 3  | 4  | 3  | 3  | 3  | 3  | 3  | 3  | 3  |
| Kenya - Mombasa         | DHS    | 3  | 30 | 0  | 0  | 9  | 0  | 15 | 18 | 8  |
| Kenya - Mombasa         | MICS   | 3  | 5  | 3  | 3  | 3  | 3  | 5  | 4  | 3  |
| Kenya - Murang'a        | DHS    | 32 | 52 | 30 | 30 | 34 | 30 | 47 | 49 | 41 |
| Kenya - Nairobi         | DHS    | 11 | 25 | 6  | 6  | 10 | 6  | 17 | 11 | 9  |
| Kenya - Nakuru          | DHS    | 23 | 49 | 18 | 18 | 22 | 18 | 39 | 48 | 32 |
| Kenya - Nandi           | DHS    | 37 | 51 | 36 | 36 | 38 | 36 | 49 | 38 | 37 |
| Kenya - Narok           | DHS    | 37 | 47 | 30 | 30 | 35 | 33 | 40 | 41 | 37 |
| Kenya - Nyamira         | DHS    | 25 | 26 | 24 | 24 | 26 | 24 | 31 | 31 | 29 |
| Kenya - Nyamira         | MICS   | 6  | 8  | 6  | 6  | 6  | 6  | 10 | 7  | 6  |
| Kenya - Nyandarua       | DHS    | 49 | 45 | 42 | 42 | 44 | 43 | 53 | 52 | 46 |
| Kenya - Nyeri           | DHS    | 35 | 46 | 33 | 33 | 38 | 33 | 47 | 49 | 44 |
| Kenya - Samburu         | DHS    | 18 | 21 | 18 | 18 | 18 | 18 | 20 | 23 | 19 |
| Kenya - Siaya           | DHS    | 16 | 36 | 12 | 12 | 12 | 12 | 14 | 13 | 12 |
| Kenya - Siaya           | MICS   | 6  | 6  | 6  | 6  | 6  | 6  | 6  | 6  | 6  |
| Kenya - Taita Taveta    | DHS    | 36 | 43 | 33 | 33 | 39 | 34 | 45 | 42 | 38 |
| Kenya - Tana River      | DHS    | 27 | 29 | 27 | 27 | 27 | 27 | 28 | 27 | 27 |
| Kenya - Tharaka Nithi   | MICS   | 6  | 10 | 6  | 6  | 6  | 6  | 6  | 6  | 6  |
| Kenya - Tharaka Nithi   | DHS    | 14 | 17 | 14 | 14 | 17 | 14 | 18 | 16 | 15 |
| Kenya - Trans Nzoia     | DHS    | 40 | 47 | 30 | 30 | 33 | 31 | 41 | 39 | 36 |
| Kenya - Turkana         | DHS    | 14 | 24 | 12 | 12 | 13 | 12 | 14 | 17 | 12 |
| Kenya - Uasin Gishu     | DHS    | 27 | 35 | 24 | 24 | 27 | 24 | 35 | 31 | 26 |
| Kenya - Vihiga          | DHS    | 14 | 20 | 3  | 3  | 9  | 7  | 14 | 13 | 9  |
| Kenya - Wajir           | DHS    | 5  | 11 | 3  | 3  | 5  | 5  | 13 | 4  | 4  |
| Kenya - West Pokot      | DHS    | 37 | 42 | 36 | 36 | 37 | 36 | 43 | 43 | 41 |
| Kiribati                | Other  | 21 | 21 | 21 | 21 | 21 | 21 | 21 | 21 | 21 |
| Kyrgyzstan              | MICS   | 12 | 12 | 12 | 12 | 12 | 12 | 12 | 13 | 12 |
| Kyrgyzstan              | DHS    | 15 | 15 | 15 | 15 | 15 | 15 | 15 | 15 | 15 |
| Kyrgyzstan              | LSMS   | 6  | 6  | 6  | 6  | 6  | 6  | 7  | 6  | 6  |
| Kyrgyzstan              | Other  | 48 | 48 | 48 | 48 | 48 | 48 | 48 | 48 | 48 |
| Laos                    | MICS   | 18 | 18 | 18 | 18 | 18 | 18 | 18 | 18 | 18 |
| Latvia                  | MICS   | 3  | 3  | 3  | 3  | 3  | 3  | 3  | 3  | 3  |
| Latvia                  | Other  | 0  | 0  | 0  | 0  | 0  | 0  | 0  | 2  | 0  |
| Lebanon                 | Other  | 15 | 15 | 15 | 15 | 15 | 15 | 16 | 16 | 16 |
| Lebanon                 | PAPFAM | 9  | 9  | 9  | 9  | 9  | 9  | 16 | 12 | 12 |
| Lebanon                 | VR     | 3  | 3  | 3  | 3  | 3  | 3  | 3  | 3  | 3  |
| Lesotho                 | WFS    | 6  | 6  | 6  | 6  | 6  | 6  | 6  | 6  | 6  |
| Lesotho                 | DHS    | 27 | 27 | 27 | 27 | 27 | 27 | 27 | 27 | 27 |
| Liberia                 | DHS    | 30 | 30 | 30 | 30 | 30 | 30 | 30 | 30 | 30 |
| Liberia                 | Other  | 9  | 9  | 9  | 9  | 9  | 9  | 9  | 9  | 9  |
| Libya                   | Other  | 15 | 15 | 15 | 15 | 15 | 15 | 15 | 15 | 15 |
| Lithuania               | MICS   | 3  | 3  | 3  | 3  | 3  | 3  | 3  | 3  | 3  |
| Lithuania               | Other  | 0  | 0  | 0  | 0  | 0  | 0  | 0  | 2  | 0  |
| Luxembourg              | Other  | 2  | 18 | 0  | 0  | 6  | 0  | 0  | 1  | 11 |
| Madagascar              | Other  | 39 | 39 | 39 | 39 | 39 | 39 | 39 | 39 | 39 |
| Madagascar              | DHS    | 39 | 39 | 39 | 39 | 39 | 39 | 39 | 39 | 39 |
| Madagascar              | DHS    | 39 | 39 | 39 | 39 | 39 | 39 | 39 | 39 | 39 |
| Malawi                  | MICS   | 21 | 21 | 21 | 21 | 21 | 21 | 21 | 21 | 21 |
| Malaysia                | Other  | 15 | 15 | 15 | 15 | 15 | 15 | 15 | 15 | 15 |
| Malaysia                | WFS    | 6  | 6  | 6  | 6  | 6  | 6  | 6  | 6  | 6  |
| Malaysia                | VR     | 6  | 6  | 6  | 6  | 6  | 6  | 6  | 6  | 6  |
| Maldives                | Other  | 84 | 84 | 84 | 84 | 84 | 84 | 84 | 84 | 84 |
| Maldives                | DHS    | 18 | 18 | 18 | 19 | 18 | 18 | 23 | 18 | 18 |

|                                          |        |     |     |     |     |     |     |     |     |     |     |
|------------------------------------------|--------|-----|-----|-----|-----|-----|-----|-----|-----|-----|-----|
| Mali                                     | DHS    | 45  | 45  | 45  | 45  | 45  | 45  | 45  | 45  | 45  | 45  |
| Mali                                     | Other  | 9   | 9   | 9   | 9   | 9   | 9   | 9   | 9   | 9   | 9   |
| Malta                                    | Other  | 0   | 6   | 0   | 0   | 0   | 0   | 0   | 0   | 2   | 4   |
| Mauritania                               | WFS    | 9   | 9   | 9   | 9   | 9   | 9   | 9   | 9   | 9   | 9   |
| Mauritania                               | Other  | 9   | 9   | 9   | 9   | 9   | 9   | 9   | 9   | 9   | 9   |
| Mauritania                               | DHS    | 9   | 9   | 9   | 9   | 9   | 9   | 9   | 9   | 9   | 9   |
| Mauritania                               | MICS   | 9   | 9   | 9   | 9   | 9   | 9   | 9   | 9   | 9   | 9   |
| Mexico                                   | Other  | 183 | 183 | 183 | 183 | 183 | 183 | 183 | 183 | 183 | 183 |
| Mexico                                   | WFS    | 6   | 6   | 6   | 6   | 6   | 6   | 6   | 6   | 6   | 6   |
| Mexico                                   | DHS    | 9   | 9   | 9   | 9   | 9   | 9   | 9   | 9   | 9   | 9   |
| Mexico                                   | VR     | 3   | 3   | 3   | 3   | 3   | 3   | 3   | 3   | 3   | 3   |
| Mexico - Aguascalientes                  | Other  | 141 | 141 | 132 | 132 | 132 | 132 | 132 | 132 | 133 | 132 |
| Mexico - Aguascalientes                  | DHS    | 9   | 9   | 9   | 9   | 9   | 9   | 9   | 9   | 9   | 9   |
| Mexico - Baja California                 | Other  | 120 | 120 | 111 | 111 | 111 | 111 | 112 | 112 | 113 | 112 |
| Mexico - Baja California                 | DHS    | 9   | 9   | 9   | 9   | 9   | 9   | 9   | 9   | 9   | 9   |
| Mexico - Baja California                 | VR     | 3   | 3   | 3   | 3   | 3   | 3   | 3   | 3   | 3   | 3   |
| Mexico - Baja California Sur             | Other  | 111 | 111 | 102 | 102 | 102 | 102 | 106 | 106 | 104 | 103 |
| Mexico - Baja California Sur             | VR     | 3   | 3   | 3   | 3   | 3   | 3   | 3   | 3   | 3   | 3   |
| Mexico - Campeche                        | Other  | 147 | 147 | 138 | 138 | 138 | 138 | 138 | 138 | 142 | 138 |
| Mexico - Campeche                        | DHS    | 9   | 9   | 9   | 9   | 9   | 9   | 9   | 9   | 9   | 9   |
| Mexico - Campeche                        | VR     | 3   | 3   | 3   | 3   | 3   | 3   | 3   | 3   | 3   | 3   |
| Mexico - Chiapas                         | DHS    | 12  | 12  | 12  | 12  | 12  | 12  | 12  | 12  | 12  | 12  |
| Mexico - Chiapas                         | Other  | 153 | 153 | 144 | 144 | 144 | 144 | 144 | 144 | 144 | 144 |
| Mexico - Chihuahua                       | Other  | 153 | 153 | 144 | 144 | 144 | 144 | 145 | 145 | 144 | 144 |
| Mexico - Chihuahua                       | DHS    | 9   | 9   | 9   | 9   | 9   | 9   | 9   | 9   | 9   | 9   |
| Mexico - Coahuila                        | Other  | 150 | 150 | 141 | 141 | 141 | 141 | 142 | 144 | 144 | 141 |
| Mexico - Coahuila                        | DHS    | 9   | 9   | 9   | 9   | 9   | 9   | 9   | 9   | 9   | 9   |
| Mexico - Colima                          | Other  | 147 | 147 | 138 | 138 | 138 | 138 | 138 | 138 | 138 | 138 |
| Mexico - Colima                          | DHS    | 9   | 9   | 9   | 9   | 9   | 9   | 9   | 9   | 9   | 9   |
| Mexico - Colima                          | VR     | 3   | 3   | 3   | 3   | 3   | 3   | 3   | 3   | 3   | 3   |
| Mexico - Durango                         | Other  | 147 | 147 | 138 | 138 | 138 | 138 | 138 | 138 | 138 | 138 |
| Mexico - Durango                         | DHS    | 9   | 9   | 9   | 9   | 9   | 9   | 9   | 9   | 9   | 9   |
| Mexico - Guanajuato                      | Other  | 102 | 102 | 93  | 93  | 93  | 93  | 93  | 93  | 95  | 93  |
| Mexico - Guanajuato                      | DHS    | 9   | 9   | 9   | 9   | 9   | 9   | 9   | 9   | 9   | 9   |
| Mexico - Guanajuato                      | VR     | 3   | 3   | 3   | 3   | 3   | 3   | 3   | 3   | 3   | 3   |
| Mexico - Guerrero                        | DHS    | 12  | 12  | 12  | 12  | 12  | 12  | 12  | 12  | 12  | 12  |
| Mexico - Guerrero                        | Other  | 153 | 153 | 144 | 144 | 144 | 144 | 144 | 144 | 144 | 144 |
| Mexico - Guerrero                        | VR     | 3   | 3   | 3   | 3   | 3   | 3   | 3   | 3   | 3   | 3   |
| Mexico - Hidalgo                         | Other  | 141 | 141 | 132 | 132 | 132 | 132 | 132 | 132 | 132 | 132 |
| Mexico - Hidalgo                         | DHS    | 9   | 9   | 9   | 9   | 9   | 9   | 9   | 9   | 9   | 9   |
| Mexico - Jalisco                         | DHS    | 12  | 12  | 12  | 12  | 12  | 12  | 12  | 12  | 12  | 12  |
| Mexico - Jalisco                         | Other  | 132 | 132 | 123 | 123 | 123 | 123 | 124 | 125 | 125 | 123 |
| Mexico - Mexico City                     | DHS    | 12  | 12  | 12  | 12  | 12  | 12  | 12  | 12  | 12  | 12  |
| Mexico - Mexico City                     | Other  | 96  | 96  | 87  | 87  | 87  | 87  | 90  | 87  | 87  | 87  |
| Mexico - Michoacán de Ocampo             | Other  | 156 | 156 | 147 | 147 | 147 | 147 | 148 | 147 | 147 | 147 |
| Mexico - Michoacán de Ocampo             | DHS    | 9   | 9   | 9   | 9   | 9   | 9   | 9   | 9   | 9   | 9   |
| Mexico - Michoacán de Ocampo             | VR     | 3   | 3   | 3   | 3   | 3   | 3   | 3   | 3   | 3   | 3   |
| Mexico - Morelos                         | Other  | 150 | 150 | 141 | 141 | 141 | 141 | 142 | 141 | 141 | 141 |
| Mexico - Morelos                         | DHS    | 9   | 9   | 9   | 9   | 9   | 9   | 9   | 9   | 9   | 9   |
| Mexico - Morelos                         | VR     | 3   | 3   | 3   | 3   | 3   | 3   | 3   | 3   | 3   | 3   |
| Mexico - México                          | Other  | 108 | 108 | 99  | 99  | 99  | 99  | 99  | 99  | 99  | 99  |
| Mexico - México                          | DHS    | 9   | 9   | 9   | 9   | 9   | 9   | 9   | 9   | 9   | 9   |
| Mexico - México                          | VR     | 3   | 3   | 3   | 3   | 3   | 3   | 3   | 3   | 3   | 3   |
| Mexico - Nayarit                         | Other  | 150 | 150 | 141 | 141 | 141 | 141 | 141 | 141 | 141 | 141 |
| Mexico - Nayarit                         | DHS    | 9   | 9   | 9   | 9   | 9   | 9   | 9   | 9   | 9   | 9   |
| Mexico - Nayarit                         | VR     | 3   | 3   | 3   | 3   | 3   | 3   | 3   | 3   | 3   | 3   |
| Mexico - Nuevo León                      | DHS    | 12  | 12  | 12  | 12  | 12  | 12  | 12  | 12  | 12  | 12  |
| Mexico - Nuevo León                      | Other  | 150 | 150 | 141 | 144 | 141 | 141 | 142 | 142 | 142 | 142 |
| Mexico - Oaxaca                          | Other  | 156 | 156 | 147 | 147 | 147 | 147 | 147 | 147 | 147 | 147 |
| Mexico - Oaxaca                          | DHS    | 9   | 9   | 9   | 9   | 9   | 9   | 9   | 9   | 9   | 9   |
| Mexico - Oaxaca                          | VR     | 3   | 3   | 3   | 3   | 3   | 3   | 3   | 3   | 3   | 3   |
| Mexico - Puebla                          | Other  | 141 | 141 | 132 | 132 | 132 | 132 | 132 | 132 | 132 | 132 |
| Mexico - Puebla                          | DHS    | 9   | 9   | 9   | 9   | 9   | 9   | 9   | 9   | 9   | 9   |
| Mexico - Puebla                          | VR     | 3   | 3   | 3   | 3   | 3   | 3   | 3   | 3   | 3   | 3   |
| Mexico - Querétaro                       | DHS    | 12  | 12  | 12  | 12  | 12  | 12  | 12  | 12  | 12  | 12  |
| Mexico - Querétaro                       | Other  | 114 | 114 | 105 | 105 | 105 | 105 | 105 | 105 | 105 | 105 |
| Mexico - Quintana Roo                    | Other  | 147 | 147 | 138 | 138 | 138 | 138 | 140 | 138 | 138 | 138 |
| Mexico - Quintana Roo                    | VR     | 3   | 3   | 3   | 3   | 3   | 3   | 3   | 3   | 3   | 3   |
| Mexico - San Luis Potosí                 | Other  | 156 | 156 | 147 | 147 | 147 | 147 | 147 | 147 | 151 | 147 |
| Mexico - San Luis Potosí                 | DHS    | 9   | 9   | 9   | 9   | 9   | 9   | 9   | 9   | 9   | 9   |
| Mexico - San Luis Potosí                 | VR     | 3   | 3   | 3   | 3   | 3   | 3   | 3   | 3   | 3   | 3   |
| Mexico - Sinaloa                         | Other  | 150 | 150 | 141 | 141 | 141 | 141 | 141 | 142 | 142 | 142 |
| Mexico - Sinaloa                         | DHS    | 9   | 9   | 9   | 9   | 9   | 9   | 9   | 9   | 9   | 9   |
| Mexico - Sonora                          | Other  | 150 | 150 | 141 | 141 | 141 | 141 | 143 | 143 | 142 | 142 |
| Mexico - Sonora                          | DHS    | 9   | 9   | 9   | 9   | 9   | 9   | 9   | 9   | 9   | 9   |
| Mexico - Sonora                          | VR     | 3   | 3   | 3   | 3   | 3   | 3   | 3   | 3   | 3   | 3   |
| Mexico - Tabasco                         | Other  | 159 | 159 | 150 | 150 | 150 | 150 | 150 | 150 | 150 | 150 |
| Mexico - Tabasco                         | DHS    | 9   | 9   | 9   | 9   | 9   | 9   | 9   | 9   | 9   | 9   |
| Mexico - Tamaulipas                      | Other  | 150 | 150 | 141 | 141 | 141 | 141 | 142 | 144 | 144 | 141 |
| Mexico - Tamaulipas                      | DHS    | 9   | 9   | 9   | 9   | 9   | 9   | 9   | 9   | 9   | 9   |
| Mexico - Tlaxcala                        | Other  | 96  | 96  | 87  | 87  | 87  | 87  | 87  | 87  | 87  | 87  |
| Mexico - Tlaxcala                        | DHS    | 9   | 9   | 9   | 9   | 9   | 9   | 9   | 9   | 9   | 9   |
| Mexico - Tlaxcala                        | VR     | 3   | 3   | 3   | 3   | 3   | 3   | 3   | 3   | 3   | 3   |
| Mexico - Veracruz de Ignacio de la Llave | DHS    | 12  | 12  | 12  | 12  | 12  | 12  | 12  | 12  | 12  | 12  |
| Mexico - Veracruz de Ignacio de la Llave | Other  | 153 | 153 | 144 | 144 | 144 | 144 | 144 | 144 | 145 | 144 |
| Mexico - Veracruz de Ignacio de la Llave | VR     | 3   | 3   | 3   | 3   | 3   | 3   | 3   | 3   | 3   | 3   |
| Mexico - Yucatán                         | Other  | 150 | 150 | 141 | 141 | 141 | 141 | 142 | 142 | 142 | 141 |
| Mexico - Yucatán                         | DHS    | 9   | 9   | 9   | 9   | 9   | 9   | 9   | 9   | 9   | 9   |
| Mexico - Zacatecas                       | Other  | 150 | 150 | 141 | 141 | 141 | 141 | 143 | 142 | 142 | 142 |
| Mexico - Zacatecas                       | DHS    | 9   | 9   | 9   | 9   | 9   | 9   | 9   | 9   | 9   | 9   |
| Mexico - Zacatecas                       | VR     | 3   | 3   | 3   | 3   | 3   | 3   | 3   | 3   | 3   | 3   |
| Moldova                                  | MICS   | 15  | 19  | 15  | 15  | 15  | 15  | 21  | 21  | 21  | 18  |
| Moldova                                  | DHS    | 9   | 13  | 9   | 9   | 9   | 9   | 10  | 9   | 9   | 9   |
| Moldova                                  | Other  | 81  | 81  | 81  | 81  | 81  | 81  | 81  | 81  | 81  | 81  |
| Monaco                                   | Other  | 18  | 18  | 18  | 18  | 18  | 18  | 18  | 18  | 18  | 34  |
| Mongolia                                 | Other  | 9   | 9   | 9   | 9   | 9   | 9   | 9   | 9   | 9   | 9   |
| Mongolia                                 | MICS   | 9   | 9   | 9   | 9   | 9   | 9   | 9   | 9   | 9   | 9   |
| Mongolia                                 | VR     | 39  | 39  | 39  | 39  | 39  | 39  | 39  | 39  | 39  | 39  |
| Montenegro                               | Other  | 105 | 105 | 105 | 105 | 105 | 105 | 105 | 105 | 109 | 105 |
| Montenegro                               | VR     | 3   | 3   | 3   | 3   | 3   | 3   | 3   | 3   | 3   | 3   |
| Morocco                                  | WFS    | 9   | 9   | 9   | 9   | 9   | 9   | 9   | 9   | 9   | 9   |
| Morocco                                  | DHS    | 42  | 42  | 42  | 42  | 42  | 42  | 42  | 42  | 42  | 42  |
| Morocco                                  | Other  | 78  | 78  | 78  | 78  | 78  | 78  | 78  | 78  | 78  | 78  |
| Morocco                                  | PAPFAM | 21  | 21  | 21  | 21  | 21  | 21  | 21  | 21  | 21  | 21  |
| Mozambique                               | DHS    | 45  | 45  | 45  | 45  | 45  | 45  | 45  | 45  | 45  | 45  |
| Mozambique                               | MICS   | 12  | 12  | 12  | 12  | 12  | 12  | 12  | 12  | 12  | 12  |
| Mozambique                               | RHS    | 6   | 6   | 6   | 6   | 6   | 6   | 6   | 6   | 6   | 6   |

|                                |       |     |     |     |     |     |     |     |     |     |     |
|--------------------------------|-------|-----|-----|-----|-----|-----|-----|-----|-----|-----|-----|
| Myanmar                        | Other | 3   | 3   | 3   | 3   | 3   | 3   | 3   | 3   | 3   | 3   |
| Myanmar                        | VR    | 3   | 3   | 3   | 3   | 3   | 3   | 3   | 3   | 3   | 3   |
| Namibia                        | DHS   | 36  | 36  | 36  | 36  | 36  | 36  | 36  | 36  | 36  | 36  |
| Namibia                        | VR    | 3   | 3   | 3   | 3   | 3   | 3   | 3   | 3   | 3   | 3   |
| Nauru                          | Other | 3   | 3   | 3   | 3   | 3   | 3   | 3   | 3   | 3   | 7   |
| Nauru                          | VR    | 3   | 3   | 3   | 3   | 3   | 3   | 3   | 3   | 3   | 9   |
| Nepal                          | WFS   | 6   | 6   | 6   | 6   | 6   | 6   | 6   | 6   | 6   | 6   |
| Nepal                          | DHS   | 36  | 36  | 36  | 36  | 36  | 36  | 36  | 36  | 36  | 36  |
| Nepal                          | MICS  | 9   | 9   | 9   | 9   | 9   | 9   | 9   | 9   | 9   | 9   |
| Netherlands                    | Other | 0   | 0   | 0   | 0   | 0   | 0   | 0   | 0   | 1   | 0   |
| New Zealand                    | Other | 0   | 0   | 0   | 0   | 0   | 0   | 0   | 0   | 3   | 0   |
| Nicaragua                      | Other | 147 | 147 | 147 | 147 | 147 | 147 | 147 | 147 | 147 | 147 |
| Nicaragua                      | RHS   | 18  | 18  | 18  | 18  | 18  | 18  | 18  | 18  | 18  | 18  |
| Nicaragua                      | DHS   | 39  | 39  | 39  | 39  | 39  | 39  | 39  | 39  | 39  | 39  |
| Niger                          | DHS   | 36  | 36  | 36  | 36  | 36  | 36  | 36  | 36  | 36  | 36  |
| Nigeria                        | DHS   | 75  | 75  | 75  | 75  | 75  | 75  | 75  | 75  | 75  | 75  |
| Nigeria                        | Other | 21  | 21  | 21  | 21  | 21  | 21  | 21  | 21  | 21  | 21  |
| Nigeria                        | MICS  | 12  | 12  | 12  | 12  | 12  | 12  | 12  | 12  | 12  | 12  |
| Niue                           | Other | 24  | 24  | 24  | 24  | 24  | 24  | 24  | 24  | 24  | 26  |
| Niue                           | VR    | 48  | 48  | 48  | 48  | 48  | 48  | 61  | 48  | 48  | 71  |
| North Macedonia                | Other | 0   | 0   | 0   | 0   | 0   | 0   | 0   | 0   | 3   | 0   |
| Northern Mariana Islands       | Other | 3   | 7   | 4   | 6   | 4   | 3   | 3   | 3   | 3   | 5   |
| Norway                         | Other | 0   | 0   | 0   | 0   | 0   | 0   | 0   | 1   | 0   | 0   |
| Norway - Agder                 | VR    | 24  | 24  | 24  | 24  | 24  | 24  | 24  | 24  | 24  | 35  |
| Norway - Innlandet             | VR    | 0   | 0   | 0   | 0   | 0   | 0   | 0   | 0   | 0   | 14  |
| Norway - Møre og Romsdal       | VR    | 9   | 9   | 9   | 9   | 9   | 9   | 9   | 9   | 9   | 22  |
| Norway - Nordland              | VR    | 9   | 9   | 9   | 9   | 9   | 9   | 9   | 9   | 9   | 18  |
| Norway - Oslo                  | VR    | 3   | 3   | 3   | 3   | 3   | 3   | 3   | 3   | 3   | 5   |
| Norway - Rogaland              | VR    | 0   | 0   | 0   | 0   | 0   | 0   | 0   | 0   | 0   | 9   |
| Norway - Troms og Finnmark     | VR    | 0   | 0   | 0   | 0   | 0   | 1   | 0   | 0   | 0   | 14  |
| Norway - Trøndelag             | VR    | 6   | 6   | 6   | 6   | 6   | 6   | 6   | 6   | 6   | 12  |
| Norway - Vestfold og Telemark  | VR    | 9   | 9   | 9   | 9   | 9   | 9   | 9   | 9   | 9   | 17  |
| Norway - Vestland              | VR    | 0   | 0   | 0   | 0   | 0   | 0   | 0   | 0   | 0   | 4   |
| Norway - Viken                 | VR    | 0   | 0   | 0   | 0   | 0   | 0   | 0   | 0   | 0   | 2   |
| Oman                           | Other | 12  | 12  | 12  | 12  | 12  | 12  | 12  | 12  | 12  | 12  |
| Pakistan                       | WFS   | 6   | 6   | 6   | 6   | 6   | 6   | 6   | 6   | 6   | 6   |
| Pakistan                       | DHS   | 66  | 66  | 66  | 66  | 66  | 66  | 66  | 66  | 66  | 66  |
| Pakistan                       | Other | 75  | 75  | 66  | 66  | 66  | 66  | 66  | 66  | 66  | 66  |
| Pakistan                       | LSMS  | 18  | 18  | 12  | 12  | 12  | 12  | 12  | 12  | 12  | 12  |
| Pakistan - Balochistan         | DHS   | 27  | 27  | 27  | 27  | 27  | 27  | 27  | 27  | 27  | 27  |
| Pakistan - Khyber Pakhtunkhwa  | DHS   | 12  | 12  | 12  | 12  | 12  | 12  | 12  | 12  | 12  | 12  |
| Pakistan - Punjab              | DHS   | 15  | 15  | 15  | 15  | 15  | 15  | 15  | 15  | 15  | 15  |
| Pakistan - Sindh               | DHS   | 15  | 15  | 15  | 15  | 15  | 15  | 15  | 15  | 15  | 15  |
| Palau                          | Other | 3   | 3   | 3   | 3   | 3   | 3   | 3   | 3   | 3   | 3   |
| Palestine                      | Other | 78  | 78  | 78  | 78  | 78  | 78  | 78  | 78  | 78  | 78  |
| Palestine                      | DHS   | 18  | 18  | 9   | 9   | 9   | 9   | 9   | 9   | 9   | 9   |
| Palestine                      | MICS  | 21  | 21  | 21  | 21  | 21  | 21  | 21  | 21  | 21  | 21  |
| Panama                         | Other | 3   | 3   | 3   | 3   | 3   | 3   | 3   | 3   | 3   | 3   |
| Panama                         | WFS   | 6   | 6   | 6   | 6   | 6   | 6   | 6   | 6   | 6   | 6   |
| Papua New Guinea               | Other | 3   | 3   | 3   | 3   | 3   | 3   | 3   | 3   | 3   | 3   |
| Paraguay                       | Other | 156 | 156 | 156 | 156 | 156 | 156 | 156 | 156 | 156 | 156 |
| Paraguay                       | DHS   | 9   | 9   | 9   | 9   | 9   | 9   | 9   | 9   | 9   | 9   |
| Paraguay                       | RHS   | 27  | 28  | 27  | 27  | 27  | 27  | 27  | 27  | 31  | 27  |
| Peru                           | Other | 225 | 225 | 225 | 225 | 225 | 225 | 225 | 225 | 225 | 225 |
| Peru                           | WFS   | 9   | 9   | 9   | 9   | 9   | 9   | 9   | 9   | 9   | 9   |
| Peru                           | DHS   | 132 | 132 | 132 | 132 | 132 | 132 | 132 | 132 | 132 | 132 |
| Peru                           | VR    | 3   | 3   | 3   | 3   | 3   | 3   | 3   | 3   | 3   | 3   |
| Philippines                    | Other | 204 | 204 | 204 | 204 | 204 | 204 | 204 | 204 | 204 | 204 |
| Philippines                    | WFS   | 9   | 9   | 9   | 9   | 9   | 9   | 9   | 9   | 9   | 9   |
| Philippines                    | DHS   | 114 | 114 | 114 | 114 | 114 | 114 | 114 | 114 | 114 | 114 |
| Philippines - Abra             | Other | 36  | 36  | 36  | 36  | 36  | 36  | 36  | 36  | 36  | 36  |
| Philippines - Abra             | DHS   | 39  | 39  | 39  | 39  | 39  | 39  | 39  | 39  | 39  | 39  |
| Philippines - Agusan Del Norte | Other | 60  | 60  | 60  | 60  | 60  | 60  | 60  | 60  | 60  | 60  |
| Philippines - Agusan Del Norte | DHS   | 42  | 42  | 42  | 42  | 42  | 42  | 42  | 42  | 42  | 42  |
| Philippines - Agusan Del Sur   | Other | 48  | 49  | 48  | 48  | 48  | 48  | 48  | 48  | 48  | 48  |
| Philippines - Agusan Del Sur   | DHS   | 42  | 42  | 42  | 42  | 42  | 42  | 42  | 42  | 42  | 42  |
| Philippines - Aklan            | Other | 39  | 39  | 39  | 39  | 39  | 39  | 39  | 39  | 39  | 39  |
| Philippines - Aklan            | DHS   | 39  | 39  | 39  | 39  | 39  | 39  | 39  | 39  | 39  | 39  |
| Philippines - Albay            | Other | 33  | 33  | 33  | 33  | 33  | 33  | 33  | 33  | 33  | 33  |
| Philippines - Albay            | DHS   | 42  | 42  | 42  | 42  | 42  | 42  | 42  | 42  | 42  | 42  |
| Philippines - Antique          | Other | 60  | 60  | 60  | 60  | 60  | 60  | 60  | 60  | 60  | 60  |
| Philippines - Antique          | DHS   | 36  | 36  | 36  | 36  | 36  | 36  | 36  | 36  | 36  | 36  |
| Philippines - Apayao           | DHS   | 39  | 39  | 39  | 39  | 39  | 39  | 39  | 39  | 39  | 39  |
| Philippines - Apayao           | Other | 3   | 3   | 3   | 3   | 3   | 3   | 3   | 3   | 3   | 3   |
| Philippines - Aurora           | DHS   | 38  | 38  | 38  | 38  | 38  | 38  | 38  | 38  | 38  | 38  |
| Philippines - Aurora           | Other | 27  | 27  | 27  | 27  | 27  | 27  | 27  | 27  | 27  | 27  |
| Philippines - Basilan          | Other | 24  | 24  | 24  | 24  | 24  | 24  | 24  | 24  | 24  | 24  |
| Philippines - Basilan          | DHS   | 39  | 39  | 39  | 39  | 39  | 39  | 39  | 39  | 39  | 39  |
| Philippines - Bataan           | Other | 39  | 39  | 39  | 39  | 39  | 39  | 39  | 39  | 39  | 39  |
| Philippines - Bataan           | DHS   | 39  | 39  | 39  | 39  | 39  | 39  | 39  | 39  | 39  | 39  |
| Philippines - Batanes          | Other | 6   | 6   | 6   | 6   | 6   | 6   | 6   | 6   | 6   | 7   |
| Philippines - Batanes          | DHS   | 25  | 25  | 25  | 25  | 25  | 25  | 25  | 25  | 25  | 25  |
| Philippines - Batangas         | Other | 42  | 42  | 42  | 42  | 42  | 42  | 42  | 42  | 42  | 42  |
| Philippines - Batangas         | DHS   | 42  | 42  | 42  | 42  | 42  | 42  | 42  | 42  | 42  | 42  |
| Philippines - Benguet          | Other | 42  | 42  | 42  | 42  | 42  | 42  | 42  | 42  | 42  | 42  |
| Philippines - Benguet          | DHS   | 42  | 42  | 42  | 42  | 42  | 42  | 42  | 42  | 42  | 42  |
| Philippines - Biliran          | DHS   | 39  | 39  | 39  | 39  | 39  | 39  | 39  | 39  | 39  | 39  |
| Philippines - Biliran          | Other | 30  | 30  | 30  | 31  | 30  | 30  | 30  | 30  | 30  | 30  |
| Philippines - Bohol            | Other | 78  | 78  | 78  | 78  | 78  | 78  | 78  | 78  | 78  | 78  |
| Philippines - Bohol            | DHS   | 39  | 39  | 39  | 39  | 39  | 39  | 39  | 39  | 39  | 39  |
| Philippines - Bukidnon         | Other | 78  | 78  | 78  | 78  | 78  | 78  | 78  | 78  | 78  | 78  |
| Philippines - Bukidnon         | DHS   | 42  | 42  | 42  | 42  | 42  | 42  | 42  | 42  | 42  | 42  |
| Philippines - Bulacan          | Other | 42  | 42  | 42  | 42  | 42  | 42  | 42  | 42  | 42  | 42  |
| Philippines - Bulacan          | DHS   | 42  | 42  | 42  | 42  | 42  | 42  | 42  | 42  | 42  | 42  |
| Philippines - Cagayan          | Other | 63  | 63  | 63  | 63  | 63  | 63  | 63  | 63  | 63  | 63  |
| Philippines - Cagayan          | DHS   | 42  | 42  | 42  | 42  | 42  | 42  | 42  | 42  | 42  | 42  |
| Philippines - Camarines Norte  | Other | 42  | 42  | 42  | 42  | 42  | 42  | 42  | 42  | 42  | 42  |
| Philippines - Camarines Norte  | DHS   | 39  | 39  | 39  | 39  | 39  | 39  | 39  | 39  | 39  | 39  |
| Philippines - Camarines Sur    | Other | 57  | 57  | 57  | 57  | 57  | 57  | 57  | 57  | 57  | 57  |
| Philippines - Camarines Sur    | DHS   | 42  | 42  | 42  | 42  | 42  | 42  | 42  | 42  | 42  | 42  |
| Philippines - Camiguin         | DHS   | 36  | 36  | 36  | 36  | 36  | 36  | 36  | 36  | 36  | 36  |
| Philippines - Capiz            | Other | 78  | 78  | 78  | 78  | 78  | 78  | 78  | 78  | 78  | 78  |
| Philippines - Capiz            | DHS   | 42  | 42  | 42  | 42  | 42  | 42  | 42  | 42  | 42  | 42  |
| Philippines - Catanduanes      | Other | 48  | 48  | 48  | 48  | 48  | 48  | 48  | 48  | 48  | 48  |
| Philippines - Catanduanes      | DHS   | 38  | 38  | 38  | 38  | 38  | 38  | 38  | 38  | 38  | 38  |
| Philippines - Cavite           | Other | 42  | 42  | 42  | 42  | 42  | 42  | 42  | 42  | 42  | 42  |
| Philippines - Cavite           | DHS   | 42  | 42  | 42  | 42  | 42  | 42  | 42  | 42  | 42  | 42  |

|                                         |       |    |    |    |    |    |    |    |    |    |    |
|-----------------------------------------|-------|----|----|----|----|----|----|----|----|----|----|
| Philippines - Cebu                      | Other | 42 | 42 | 42 | 42 | 42 | 42 | 42 | 42 | 42 | 42 |
| Philippines - Cebu                      | DHS   | 45 | 45 | 45 | 45 | 45 | 45 | 45 | 45 | 45 | 45 |
| Philippines - Cotabato (North Cotabato) | Other | 78 | 78 | 78 | 78 | 78 | 78 | 78 | 78 | 78 | 78 |
| Philippines - Cotabato (North Cotabato) | DHS   | 42 | 42 | 42 | 42 | 42 | 42 | 42 | 42 | 42 | 42 |
| Philippines - Davao Del Norte           | Other | 36 | 36 | 36 | 36 | 36 | 36 | 36 | 36 | 36 | 36 |
| Philippines - Davao Del Norte           | DHS   | 39 | 39 | 39 | 39 | 39 | 39 | 39 | 39 | 39 | 39 |
| Philippines - Davao Del Sur             | Other | 42 | 42 | 42 | 42 | 42 | 42 | 42 | 42 | 42 | 42 |
| Philippines - Davao Del Sur             | DHS   | 45 | 45 | 45 | 45 | 45 | 45 | 45 | 45 | 45 | 45 |
| Philippines - Davao Occidental          | DHS   | 9  | 9  | 9  | 9  | 9  | 9  | 9  | 9  | 9  | 9  |
| Philippines - Davao Occidental          | Other | 9  | 9  | 9  | 9  | 9  | 9  | 9  | 9  | 9  | 9  |
| Philippines - Davao Oriental            | Other | 75 | 75 | 75 | 75 | 75 | 75 | 75 | 75 | 75 | 75 |
| Philippines - Davao Oriental            | DHS   | 42 | 42 | 42 | 42 | 42 | 42 | 42 | 42 | 42 | 42 |
| Philippines - Davao de Oro              | Other | 45 | 45 | 45 | 45 | 45 | 45 | 45 | 45 | 45 | 45 |
| Philippines - Davao de Oro              | DHS   | 36 | 36 | 36 | 36 | 36 | 36 | 36 | 36 | 36 | 36 |
| Philippines - Dinagat Islands           | DHS   | 9  | 9  | 9  | 9  | 9  | 9  | 9  | 9  | 9  | 9  |
| Philippines - Dinagat Islands           | Other | 3  | 3  | 3  | 3  | 3  | 3  | 3  | 3  | 3  | 3  |
| Philippines - Eastern Samar             | Other | 51 | 51 | 51 | 51 | 51 | 51 | 51 | 51 | 51 | 51 |
| Philippines - Eastern Samar             | DHS   | 39 | 39 | 39 | 39 | 39 | 39 | 39 | 39 | 39 | 39 |
| Philippines - Guimaras                  | DHS   | 35 | 35 | 35 | 35 | 35 | 35 | 35 | 35 | 35 | 35 |
| Philippines - Ifugao                    | Other | 48 | 48 | 48 | 48 | 48 | 48 | 48 | 48 | 48 | 48 |
| Philippines - Ifugao                    | DHS   | 42 | 42 | 42 | 42 | 42 | 42 | 42 | 42 | 42 | 42 |
| Philippines - Ilocos Norte              | Other | 42 | 42 | 42 | 42 | 42 | 42 | 42 | 42 | 42 | 42 |
| Philippines - Ilocos Norte              | DHS   | 39 | 39 | 39 | 39 | 39 | 39 | 39 | 39 | 39 | 39 |
| Philippines - Ilocos Sur                | Other | 42 | 42 | 42 | 42 | 42 | 42 | 42 | 42 | 42 | 42 |
| Philippines - Ilocos Sur                | DHS   | 39 | 39 | 39 | 39 | 39 | 39 | 39 | 39 | 39 | 39 |
| Philippines - Iloilo                    | Other | 42 | 42 | 42 | 42 | 42 | 42 | 42 | 42 | 42 | 42 |
| Philippines - Iloilo                    | DHS   | 42 | 42 | 42 | 42 | 42 | 42 | 42 | 42 | 42 | 42 |
| Philippines - Isabela                   | Other | 48 | 48 | 48 | 48 | 48 | 48 | 48 | 48 | 48 | 48 |
| Philippines - Isabela                   | DHS   | 45 | 45 | 45 | 45 | 45 | 45 | 45 | 45 | 45 | 45 |
| Philippines - Kalinga                   | Other | 33 | 33 | 33 | 33 | 33 | 33 | 33 | 33 | 33 | 33 |
| Philippines - Kalinga                   | DHS   | 39 | 39 | 39 | 39 | 39 | 39 | 39 | 39 | 39 | 39 |
| Philippines - La Union                  | Other | 42 | 42 | 42 | 42 | 42 | 42 | 42 | 42 | 42 | 42 |
| Philippines - La Union                  | DHS   | 36 | 36 | 36 | 36 | 36 | 36 | 36 | 36 | 36 | 36 |
| Philippines - Laguna                    | Other | 42 | 42 | 42 | 42 | 42 | 42 | 42 | 42 | 42 | 42 |
| Philippines - Laguna                    | DHS   | 42 | 42 | 42 | 42 | 42 | 42 | 42 | 42 | 42 | 42 |
| Philippines - Lanao Del Norte           | Other | 78 | 78 | 78 | 78 | 78 | 78 | 78 | 78 | 78 | 78 |
| Philippines - Lanao Del Norte           | DHS   | 42 | 42 | 42 | 42 | 42 | 42 | 42 | 42 | 42 | 42 |
| Philippines - Lanao Del Sur             | Other | 46 | 46 | 45 | 47 | 45 | 45 | 46 | 48 | 45 | 45 |
| Philippines - Lanao Del Sur             | DHS   | 42 | 42 | 42 | 42 | 42 | 42 | 42 | 42 | 42 | 42 |
| Philippines - Leyte                     | Other | 78 | 78 | 78 | 78 | 78 | 78 | 78 | 78 | 78 | 78 |
| Philippines - Leyte                     | DHS   | 42 | 42 | 42 | 42 | 42 | 42 | 42 | 42 | 42 | 42 |
| Philippines - Maguindanao               | Other | 36 | 36 | 38 | 39 | 36 | 36 | 36 | 37 | 36 | 36 |
| Philippines - Maguindanao               | DHS   | 42 | 42 | 42 | 42 | 42 | 42 | 42 | 42 | 42 | 42 |
| Philippines - Marinduque                | Other | 39 | 39 | 39 | 39 | 39 | 39 | 39 | 39 | 39 | 39 |
| Philippines - Marinduque                | DHS   | 39 | 39 | 39 | 39 | 39 | 39 | 39 | 39 | 39 | 39 |
| Philippines - Masbate                   | Other | 78 | 78 | 78 | 78 | 78 | 78 | 78 | 78 | 78 | 78 |
| Philippines - Masbate                   | DHS   | 39 | 39 | 39 | 39 | 39 | 39 | 39 | 39 | 39 | 39 |
| Philippines - Misamis Occidental        | Other | 75 | 75 | 75 | 75 | 75 | 75 | 75 | 75 | 75 | 75 |
| Philippines - Misamis Occidental        | DHS   | 39 | 39 | 39 | 39 | 39 | 39 | 39 | 39 | 39 | 39 |
| Philippines - Misamis Oriental          | Other | 69 | 69 | 69 | 69 | 69 | 69 | 69 | 69 | 69 | 69 |
| Philippines - Misamis Oriental          | DHS   | 42 | 42 | 42 | 42 | 42 | 42 | 42 | 42 | 42 | 42 |
| Philippines - Mountain Province         | Other | 39 | 39 | 39 | 39 | 39 | 39 | 39 | 39 | 39 | 39 |
| Philippines - Mountain Province         | DHS   | 39 | 39 | 39 | 39 | 39 | 39 | 39 | 39 | 39 | 39 |
| Philippines - National Capital Region   | Other | 60 | 60 | 60 | 60 | 60 | 60 | 60 | 60 | 60 | 60 |
| Philippines - National Capital Region   | DHS   | 67 | 67 | 67 | 67 | 67 | 67 | 67 | 67 | 67 | 67 |
| Philippines - Negros Occidental         | Other | 66 | 66 | 66 | 66 | 66 | 66 | 66 | 66 | 66 | 66 |
| Philippines - Negros Occidental         | DHS   | 45 | 45 | 45 | 45 | 45 | 45 | 45 | 45 | 45 | 45 |
| Philippines - Negros Oriental           | Other | 78 | 78 | 78 | 78 | 78 | 78 | 78 | 78 | 78 | 78 |
| Philippines - Negros Oriental           | DHS   | 39 | 39 | 39 | 39 | 39 | 39 | 39 | 39 | 39 | 39 |
| Philippines - Northern Samar            | Other | 60 | 60 | 60 | 60 | 60 | 60 | 60 | 60 | 60 | 60 |
| Philippines - Northern Samar            | DHS   | 39 | 39 | 39 | 39 | 39 | 39 | 39 | 39 | 39 | 39 |
| Philippines - Nueva Ecija               | Other | 42 | 42 | 42 | 42 | 42 | 42 | 42 | 42 | 42 | 42 |
| Philippines - Nueva Ecija               | DHS   | 42 | 42 | 42 | 42 | 42 | 42 | 42 | 42 | 42 | 42 |
| Philippines - Nueva Vizcaya             | Other | 42 | 42 | 42 | 42 | 42 | 42 | 42 | 42 | 42 | 42 |
| Philippines - Nueva Vizcaya             | DHS   | 39 | 39 | 39 | 39 | 39 | 39 | 39 | 39 | 39 | 39 |
| Philippines - Occidental Mindoro        | Other | 78 | 78 | 78 | 78 | 78 | 78 | 78 | 78 | 78 | 78 |
| Philippines - Occidental Mindoro        | DHS   | 39 | 39 | 39 | 39 | 39 | 39 | 39 | 39 | 39 | 39 |
| Philippines - Oriental Mindoro          | Other | 72 | 72 | 72 | 72 | 72 | 72 | 72 | 72 | 72 | 72 |
| Philippines - Oriental Mindoro          | DHS   | 39 | 39 | 39 | 39 | 39 | 39 | 39 | 39 | 39 | 39 |
| Philippines - Palawan                   | Other | 78 | 78 | 78 | 78 | 78 | 78 | 78 | 78 | 78 | 78 |
| Philippines - Palawan                   | DHS   | 41 | 41 | 41 | 41 | 41 | 41 | 41 | 41 | 41 | 41 |
| Philippines - Pampanga                  | Other | 75 | 75 | 75 | 75 | 75 | 75 | 75 | 75 | 75 | 75 |
| Philippines - Pampanga                  | DHS   | 42 | 42 | 42 | 42 | 42 | 42 | 42 | 42 | 42 | 42 |
| Philippines - Pangasinan                | Other | 42 | 42 | 42 | 42 | 42 | 42 | 42 | 42 | 42 | 42 |
| Philippines - Pangasinan                | DHS   | 45 | 45 | 45 | 45 | 45 | 45 | 45 | 45 | 45 | 45 |
| Philippines - Quezon                    | Other | 42 | 42 | 42 | 42 | 42 | 42 | 42 | 42 | 42 | 42 |
| Philippines - Quezon                    | DHS   | 42 | 42 | 42 | 42 | 42 | 42 | 42 | 42 | 42 | 42 |
| Philippines - Quirino                   | Other | 39 | 39 | 39 | 39 | 39 | 39 | 39 | 39 | 39 | 39 |
| Philippines - Quirino                   | DHS   | 38 | 38 | 38 | 38 | 38 | 38 | 38 | 38 | 38 | 38 |
| Philippines - Rizal                     | Other | 66 | 66 | 66 | 66 | 66 | 66 | 66 | 66 | 66 | 66 |
| Philippines - Rizal                     | DHS   | 43 | 43 | 43 | 43 | 43 | 43 | 43 | 43 | 43 | 43 |
| Philippines - Romblon                   | Other | 78 | 78 | 78 | 78 | 78 | 78 | 78 | 78 | 78 | 78 |
| Philippines - Romblon                   | DHS   | 41 | 41 | 41 | 41 | 41 | 41 | 41 | 41 | 41 | 41 |
| Philippines - Samar (Western Samar)     | Other | 69 | 69 | 69 | 69 | 69 | 69 | 69 | 69 | 69 | 69 |
| Philippines - Samar (Western Samar)     | DHS   | 39 | 39 | 39 | 39 | 39 | 39 | 39 | 39 | 39 | 39 |
| Philippines - Sarangani                 | Other | 42 | 42 | 42 | 42 | 42 | 42 | 42 | 42 | 42 | 42 |
| Philippines - Sarangani                 | DHS   | 12 | 12 | 12 | 13 | 12 | 12 | 12 | 12 | 12 | 12 |
| Philippines - Siquijor                  | Other | 21 | 21 | 21 | 21 | 21 | 21 | 21 | 21 | 21 | 21 |
| Philippines - Siquijor                  | DHS   | 35 | 35 | 35 | 35 | 35 | 35 | 35 | 35 | 35 | 35 |
| Philippines - Sorsogon                  | Other | 42 | 42 | 42 | 42 | 42 | 42 | 42 | 42 | 42 | 42 |
| Philippines - Sorsogon                  | DHS   | 39 | 39 | 39 | 39 | 39 | 39 | 39 | 39 | 39 | 39 |
| Philippines - South Cotabato            | Other | 72 | 72 | 72 | 72 | 72 | 72 | 72 | 72 | 72 | 72 |
| Philippines - South Cotabato            | DHS   | 42 | 42 | 42 | 42 | 42 | 42 | 42 | 42 | 42 | 42 |
| Philippines - Southern Leyte            | Other | 75 | 75 | 75 | 75 | 75 | 75 | 75 | 75 | 75 | 75 |
| Philippines - Southern Leyte            | DHS   | 39 | 39 | 39 | 39 | 39 | 39 | 39 | 39 | 39 | 39 |
| Philippines - Sultan Kudarat            | Other | 51 | 51 | 51 | 51 | 51 | 51 | 51 | 51 | 51 | 51 |
| Philippines - Sultan Kudarat            | DHS   | 42 | 42 | 42 | 42 | 42 | 42 | 42 | 42 | 42 | 42 |
| Philippines - Sulu                      | Other | 42 | 42 | 42 | 43 | 42 | 42 | 42 | 42 | 42 | 42 |
| Philippines - Sulu                      | DHS   | 42 | 42 | 42 | 42 | 42 | 42 | 42 | 42 | 42 | 42 |
| Philippines - Surigao Del Norte         | Other | 72 | 72 | 72 | 72 | 72 | 72 | 72 | 72 | 72 | 72 |
| Philippines - Surigao Del Norte         | DHS   | 42 | 42 | 42 | 42 | 42 | 42 | 42 | 42 | 42 | 42 |
| Philippines - Surigao Del Sur           | Other | 69 | 69 | 69 | 69 | 69 | 69 | 69 | 69 | 69 | 69 |
| Philippines - Surigao Del Sur           | DHS   | 42 | 42 | 42 | 42 | 42 | 42 | 42 | 42 | 42 | 42 |
| Philippines - Tarlac                    | Other | 42 | 42 | 42 | 42 | 42 | 42 | 42 | 42 | 42 | 42 |
| Philippines - Tarlac                    | DHS   | 39 | 39 | 39 | 39 | 39 | 39 | 39 | 39 | 39 | 39 |
| Philippines - Tawi-Tawi                 | Other | 21 | 21 | 21 | 21 | 21 | 21 | 21 | 21 | 21 | 21 |
| Philippines - Tawi-Tawi                 | DHS   | 42 | 42 | 42 | 42 | 42 | 42 | 42 | 42 | 42 | 42 |

|                                   |        |     |     |     |     |     |     |     |     |     |     |
|-----------------------------------|--------|-----|-----|-----|-----|-----|-----|-----|-----|-----|-----|
| Philippines - Zambales            | Other  | 42  | 42  | 42  | 42  | 42  | 42  | 42  | 42  | 42  | 42  |
| Philippines - Zambales            | DHS    | 39  | 39  | 39  | 39  | 39  | 39  | 39  | 39  | 39  | 39  |
| Philippines - Zamboanga Del Norte | Other  | 78  | 78  | 78  | 78  | 78  | 78  | 78  | 78  | 78  | 78  |
| Philippines - Zamboanga Del Norte | DHS    | 42  | 42  | 42  | 42  | 42  | 42  | 42  | 42  | 42  | 42  |
| Philippines - Zamboanga Del Sur   | Other  | 78  | 78  | 78  | 78  | 78  | 78  | 78  | 78  | 78  | 78  |
| Philippines - Zamboanga Del Sur   | DHS    | 46  | 46  | 46  | 46  | 46  | 46  | 46  | 46  | 46  | 46  |
| Philippines - Zamboanga Sibugay   | DHS    | 39  | 39  | 39  | 39  | 39  | 39  | 39  | 39  | 39  | 39  |
| Philippines - Zamboanga Sibugay   | Other  | 42  | 42  | 42  | 42  | 42  | 42  | 42  | 42  | 42  | 42  |
| Portugal                          | Other  | 12  | 12  | 12  | 12  | 12  | 12  | 12  | 12  | 12  | 12  |
| Portugal                          | WFS    | 9   | 9   | 9   | 9   | 9   | 9   | 9   | 10  | 10  | 9   |
| Puerto Rico                       | Other  | 0   | 0   | 0   | 2   | 0   | 0   | 0   | 2   | 0   | 0   |
| Puerto Rico                       | RHS    | 9   | 9   | 9   | 9   | 9   | 9   | 13  | 13  | 13  | 12  |
| Qatar                             | Other  | 9   | 9   | 9   | 9   | 9   | 9   | 9   | 9   | 9   | 9   |
| Qatar                             | VR     | 3   | 3   | 3   | 3   | 3   | 3   | 3   | 3   | 3   | 3   |
| Romania                           | LSMS   | 20  | 20  | 20  | 20  | 20  | 20  | 20  | 21  | 21  | 20  |
| Rwanda                            | WFS    | 9   | 9   | 9   | 9   | 9   | 9   | 9   | 9   | 9   | 9   |
| Rwanda                            | DHS    | 105 | 105 | 105 | 105 | 105 | 105 | 105 | 105 | 105 | 105 |
| Saint Kitts and Nevis             | Other  | 0   | 14  | 0   | 0   | 16  | 0   | 0   | 0   | 0   | 12  |
| Saint Lucia                       | Other  | 3   | 6   | 3   | 3   | 3   | 3   | 3   | 3   | 3   | 9   |
| Saint Vincent and the Grenadines  | Other  | 24  | 28  | 24  | 24  | 25  | 24  | 24  | 24  | 24  | 30  |
| Samoa                             | Other  | 54  | 54  | 54  | 54  | 54  | 54  | 54  | 54  | 54  | 54  |
| San Marino                        | Other  | 41  | 45  | 39  | 39  | 43  | 45  | 39  | 39  | 39  | 87  |
| San Marino                        | VR     | 0   | 0   | 0   | 0   | 0   | 3   | 0   | 0   | 0   | 1   |
| Saudi Arabia                      | Other  | 36  | 36  | 36  | 36  | 36  | 36  | 36  | 36  | 36  | 36  |
| Senegal                           | WFS    | 9   | 9   | 9   | 9   | 9   | 9   | 9   | 9   | 9   | 9   |
| Senegal                           | DHS    | 81  | 81  | 81  | 81  | 81  | 81  | 81  | 81  | 81  | 81  |
| Senegal                           | Other  | 9   | 9   | 9   | 9   | 9   | 9   | 9   | 9   | 9   | 9   |
| Senegal                           | MICS   | 9   | 9   | 9   | 9   | 9   | 9   | 9   | 9   | 9   | 9   |
| Serbia                            | Other  | 45  | 45  | 45  | 45  | 45  | 45  | 45  | 45  | 46  | 45  |
| Seychelles                        | Other  | 15  | 16  | 15  | 15  | 16  | 15  | 15  | 15  | 15  | 26  |
| Sierra Leone                      | DHS    | 21  | 21  | 21  | 21  | 21  | 21  | 21  | 21  | 21  | 21  |
| Sierra Leone                      | MICS   | 9   | 9   | 9   | 9   | 9   | 9   | 9   | 9   | 9   | 9   |
| Sierra Leone                      | VR     | 18  | 18  | 18  | 18  | 18  | 18  | 18  | 18  | 18  | 18  |
| Singapore                         | Other  | 39  | 39  | 39  | 39  | 39  | 39  | 40  | 42  | 39  | 39  |
| Slovakia                          | Other  | 0   | 0   | 0   | 0   | 0   | 0   | 0   | 1   | 0   | 0   |
| Slovenia                          | Other  | 0   | 0   | 0   | 0   | 0   | 0   | 0   | 8   | 0   | 0   |
| Solomon Islands                   | Other  | 6   | 6   | 6   | 6   | 6   | 6   | 6   | 6   | 6   | 6   |
| Somalia                           | MICS   | 6   | 6   | 6   | 6   | 6   | 6   | 6   | 6   | 6   | 6   |
| South Africa                      | DHS    | 18  | 21  | 18  | 18  | 18  | 18  | 18  | 18  | 18  | 18  |
| South Africa                      | Other  | 99  | 99  | 99  | 99  | 99  | 99  | 99  | 99  | 99  | 99  |
| South Africa - Eastern Cape       | DHS    | 9   | 14  | 9   | 9   | 9   | 9   | 10  | 9   | 9   | 9   |
| South Africa - Eastern Cape       | Other  | 78  | 78  | 78  | 78  | 78  | 78  | 78  | 78  | 78  | 78  |
| South Africa - Free State         | Other  | 96  | 96  | 96  | 96  | 96  | 96  | 96  | 96  | 96  | 96  |
| South Africa - Free State         | DHS    | 9   | 13  | 8   | 8   | 7   | 6   | 11  | 14  | 8   | 8   |
| South Africa - Gauteng            | Other  | 117 | 117 | 117 | 117 | 117 | 117 | 117 | 117 | 117 | 117 |
| South Africa - Gauteng            | DHS    | 10  | 16  | 11  | 13  | 10  | 9   | 18  | 18  | 13  | 13  |
| South Africa - KwaZulu-Natal      | Other  | 150 | 150 | 150 | 150 | 150 | 150 | 150 | 150 | 150 | 150 |
| South Africa - KwaZulu-Natal      | DHS    | 9   | 11  | 9   | 10  | 9   | 9   | 14  | 11  | 11  | 11  |
| South Africa - Limpopo            | Other  | 132 | 132 | 132 | 132 | 132 | 132 | 132 | 132 | 132 | 132 |
| South Africa - Limpopo            | DHS    | 9   | 17  | 11  | 12  | 9   | 9   | 16  | 13  | 9   | 9   |
| South Africa - Mpumalanga         | Other  | 123 | 123 | 123 | 123 | 123 | 123 | 123 | 123 | 123 | 123 |
| South Africa - Mpumalanga         | DHS    | 9   | 14  | 9   | 9   | 9   | 9   | 10  | 10  | 9   | 9   |
| South Africa - North West         | Other  | 102 | 102 | 102 | 102 | 102 | 102 | 102 | 102 | 102 | 102 |
| South Africa - North West         | DHS    | 6   | 15  | 7   | 6   | 6   | 6   | 13  | 10  | 9   | 9   |
| South Africa - Northern Cape      | Other  | 81  | 81  | 81  | 81  | 81  | 81  | 81  | 81  | 81  | 81  |
| South Africa - Northern Cape      | DHS    | 9   | 19  | 13  | 14  | 12  | 9   | 15  | 16  | 12  | 12  |
| South Africa - Western Cape       | Other  | 114 | 114 | 114 | 114 | 114 | 114 | 114 | 114 | 114 | 114 |
| South Africa - Western Cape       | DHS    | 24  | 24  | 24  | 24  | 24  | 24  | 24  | 24  | 24  | 24  |
| South Korea                       | WFS    | 6   | 6   | 6   | 6   | 6   | 6   | 6   | 6   | 6   | 6   |
| South Korea                       | Other  | 87  | 87  | 87  | 87  | 87  | 87  | 87  | 87  | 87  | 87  |
| South Sudan                       | MICS   | 9   | 9   | 9   | 9   | 9   | 9   | 9   | 9   | 9   | 9   |
| Spain                             | Other  | 0   | 0   | 0   | 0   | 0   | 0   | 0   | 3   | 0   | 0   |
| Sri Lanka                         | Other  | 9   | 9   | 9   | 9   | 9   | 9   | 9   | 9   | 9   | 9   |
| Sri Lanka                         | WFS    | 6   | 6   | 6   | 6   | 6   | 6   | 6   | 6   | 6   | 6   |
| Sri Lanka                         | DHS    | 9   | 9   | 9   | 9   | 9   | 9   | 9   | 9   | 9   | 9   |
| Sudan                             | WFS    | 9   | 9   | 9   | 9   | 9   | 9   | 9   | 9   | 9   | 9   |
| Sudan                             | Other  | 24  | 24  | 24  | 24  | 24  | 24  | 24  | 24  | 24  | 24  |
| Sudan                             | DHS    | 9   | 9   | 9   | 9   | 9   | 9   | 9   | 9   | 9   | 9   |
| Sudan                             | MICS   | 18  | 18  | 18  | 18  | 18  | 18  | 18  | 18  | 18  | 18  |
| Suriname                          | Other  | 171 | 171 | 171 | 171 | 171 | 171 | 171 | 171 | 171 | 171 |
| Sweden                            | Other  | 3   | 3   | 3   | 3   | 3   | 3   | 3   | 8   | 3   | 3   |
| Sweden - Stockholm                | Other  | 18  | 19  | 18  | 18  | 18  | 18  | 18  | 18  | 18  | 18  |
| Sweden - Sweden except Stockholm  | Other  | 12  | 12  | 12  | 12  | 12  | 12  | 12  | 12  | 12  | 12  |
| Switzerland                       | Other  | 0   | 0   | 0   | 0   | 0   | 0   | 0   | 4   | 0   | 0   |
| Syria                             | WFS    | 9   | 9   | 9   | 9   | 9   | 9   | 9   | 9   | 9   | 9   |
| Syria                             | Other  | 63  | 63  | 63  | 63  | 63  | 63  | 63  | 63  | 63  | 63  |
| Syria                             | PAPFAM | 9   | 9   | 9   | 9   | 9   | 9   | 9   | 9   | 9   | 9   |
| São Tomé and Príncipe             | DHS    | 9   | 9   | 9   | 9   | 9   | 9   | 9   | 9   | 9   | 9   |
| São Tomé and Príncipe             | MICS   | 9   | 9   | 9   | 9   | 9   | 9   | 9   | 9   | 9   | 9   |
| São Tomé and Príncipe             | VR     | 3   | 3   | 3   | 3   | 3   | 3   | 3   | 3   | 3   | 3   |
| Tajikistan                        | MICS   | 6   | 6   | 6   | 6   | 6   | 6   | 6   | 6   | 6   | 6   |
| Tajikistan                        | LSMS   | 20  | 20  | 20  | 20  | 20  | 20  | 20  | 20  | 20  | 20  |
| Tajikistan                        | Other  | 72  | 72  | 72  | 72  | 72  | 72  | 72  | 72  | 72  | 72  |
| Tajikistan                        | DHS    | 18  | 18  | 18  | 18  | 18  | 18  | 18  | 18  | 18  | 18  |
| Tanzania                          | DHS    | 54  | 54  | 54  | 54  | 54  | 54  | 54  | 54  | 54  | 54  |
| Tanzania                          | Other  | 18  | 18  | 18  | 18  | 18  | 18  | 18  | 18  | 18  | 18  |
| Thailand                          | Other  | 165 | 165 | 165 | 165 | 165 | 165 | 165 | 165 | 165 | 165 |
| Thailand                          | WFS    | 6   | 6   | 6   | 6   | 6   | 6   | 6   | 6   | 6   | 6   |
| Thailand                          | DHS    | 9   | 9   | 9   | 9   | 9   | 9   | 9   | 9   | 9   | 9   |
| The Bahamas                       | Other  | 12  | 144 | 12  | 12  | 14  | 12  | 12  | 13  | 12  | 12  |
| The Gambia                        | DHS    | 9   | 9   | 9   | 9   | 9   | 9   | 9   | 9   | 9   | 9   |
| Timor-Leste                       | DHS    | 12  | 14  | 12  | 12  | 12  | 12  | 12  | 12  | 12  | 12  |
| Timor-Leste                       | Other  | 6   | 6   | 6   | 6   | 6   | 6   | 6   | 6   | 6   | 6   |
| Togo                              | DHS    | 24  | 24  | 24  | 24  | 24  | 24  | 24  | 24  | 24  | 24  |
| Tokelau                           | Other  | 27  | 27  | 27  | 27  | 27  | 27  | 31  | 27  | 27  | 31  |
| Tonga                             | Other  | 30  | 30  | 30  | 30  | 30  | 30  | 30  | 30  | 30  | 30  |
| Trinidad and Tobago               | Other  | 105 | 105 | 105 | 105 | 111 | 105 | 105 | 105 | 105 | 105 |
| Trinidad and Tobago               | WFS    | 9   | 9   | 9   | 9   | 9   | 9   | 9   | 10  | 9   | 9   |
| Trinidad and Tobago               | DHS    | 9   | 10  | 9   | 9   | 9   | 9   | 13  | 10  | 9   | 9   |
| Trinidad and Tobago               | VR     | 9   | 9   | 9   | 9   | 9   | 9   | 9   | 9   | 9   | 9   |
| Tunisia                           | WFS    | 9   | 9   | 9   | 9   | 9   | 9   | 9   | 9   | 9   | 9   |
| Tunisia                           | Other  | 81  | 81  | 81  | 81  | 81  | 81  | 81  | 81  | 81  | 81  |
| Tunisia                           | DHS    | 9   | 9   | 9   | 9   | 9   | 9   | 9   | 9   | 9   | 9   |
| Tunisia                           | PAPFAM | 9   | 9   | 9   | 9   | 9   | 9   | 9   | 9   | 9   | 9   |
| Tunisia                           | MICS   | 9   | 9   | 9   | 9   | 9   | 9   | 9   | 9   | 9   | 9   |
| Turkmenistan                      | MICS   | 3   | 3   | 3   | 3   | 3   | 3   | 3   | 3   | 3   | 3   |
| Turkmenistan                      | Other  | 45  | 45  | 45  | 45  | 45  | 45  | 45  | 45  | 45  | 45  |

|                       |        |     |     |     |     |     |     |     |     |     |
|-----------------------|--------|-----|-----|-----|-----|-----|-----|-----|-----|-----|
| Tuvalu                | Other  | 3   | 3   | 3   | 3   | 3   | 4   | 3   | 3   | 13  |
| Türkiye               | WFS    | 9   | 9   | 9   | 9   | 9   | 9   | 9   | 9   | 9   |
| Türkiye               | DHS    | 36  | 36  | 36  | 36  | 36  | 36  | 36  | 36  | 36  |
| Türkiye               | Other  | 105 | 105 | 105 | 105 | 105 | 105 | 105 | 105 | 105 |
| Türkiye               | VR     | 6   | 6   | 6   | 6   | 6   | 6   | 6   | 6   | 6   |
| UK                    | Other  | 30  | 30  | 30  | 30  | 30  | 15  | 15  | 15  | 15  |
| UK - Northern Ireland | Other  | 27  | 27  | 27  | 27  | 27  | 27  | 27  | 27  | 27  |
| UK - Scotland         | Other  | 0   | 0   | 0   | 0   | 0   | 0   | 0   | 3   | 0   |
| USA - Alabama         | Other  | 3   | 3   | 3   | 3   | 3   | 3   | 3   | 3   | 3   |
| USA - Alaska          | Other  | 6   | 6   | 6   | 6   | 6   | 6   | 6   | 9   | 6   |
| USA - Arizona         | Other  | 3   | 3   | 3   | 3   | 3   | 3   | 3   | 3   | 3   |
| USA - Arkansas        | Other  | 3   | 3   | 3   | 4   | 3   | 3   | 3   | 3   | 3   |
| USA - California      | Other  | 3   | 3   | 3   | 3   | 3   | 3   | 3   | 3   | 3   |
| USA - Colorado        | Other  | 0   | 0   | 0   | 1   | 0   | 0   | 0   | 1   | 0   |
| USA - Connecticut     | Other  | 3   | 3   | 3   | 18  | 3   | 3   | 3   | 6   | 3   |
| USA - Delaware        | Other  | 0   | 0   | 0   | 0   | 0   | 0   | 0   | 5   | 0   |
| USA - Florida         | Other  | 3   | 3   | 3   | 3   | 3   | 3   | 3   | 3   | 3   |
| USA - Georgia         | Other  | 3   | 3   | 3   | 3   | 3   | 3   | 3   | 3   | 3   |
| USA - Hawaii          | Other  | 0   | 0   | 0   | 0   | 0   | 0   | 0   | 6   | 0   |
| USA - Idaho           | Other  | 0   | 0   | 0   | 10  | 0   | 0   | 0   | 2   | 0   |
| USA - Illinois        | Other  | 3   | 3   | 3   | 3   | 3   | 3   | 3   | 3   | 3   |
| USA - Indiana         | Other  | 3   | 3   | 3   | 3   | 3   | 3   | 3   | 3   | 3   |
| USA - Iowa            | Other  | 3   | 3   | 3   | 8   | 3   | 3   | 3   | 4   | 3   |
| USA - Kansas          | Other  | 3   | 3   | 3   | 4   | 3   | 3   | 3   | 4   | 3   |
| USA - Kentucky        | Other  | 3   | 3   | 3   | 4   | 3   | 3   | 3   | 3   | 3   |
| USA - Louisiana       | Other  | 3   | 3   | 3   | 3   | 3   | 3   | 3   | 3   | 3   |
| USA - Maine           | Other  | 3   | 3   | 3   | 29  | 3   | 3   | 3   | 7   | 3   |
| USA - Maryland        | Other  | 3   | 3   | 3   | 3   | 3   | 3   | 3   | 3   | 3   |
| USA - Massachusetts   | Other  | 3   | 3   | 3   | 8   | 3   | 3   | 4   | 3   | 3   |
| USA - Michigan        | Other  | 3   | 3   | 3   | 6   | 3   | 3   | 3   | 3   | 3   |
| USA - Minnesota       | Other  | 3   | 3   | 3   | 14  | 3   | 3   | 3   | 3   | 3   |
| USA - Mississippi     | Other  | 3   | 3   | 3   | 3   | 3   | 3   | 3   | 3   | 3   |
| USA - Missouri        | Other  | 3   | 3   | 3   | 3   | 3   | 3   | 3   | 3   | 3   |
| USA - Montana         | Other  | 3   | 3   | 3   | 9   | 3   | 3   | 3   | 5   | 3   |
| USA - Nebraska        | Other  | 0   | 0   | 0   | 10  | 0   | 0   | 0   | 1   | 0   |
| USA - Nevada          | Other  | 3   | 9   | 3   | 5   | 3   | 3   | 3   | 6   | 3   |
| USA - New Hampshire   | Other  | 0   | 0   | 0   | 11  | 0   | 0   | 0   | 4   | 0   |
| USA - New Jersey      | Other  | 3   | 3   | 3   | 5   | 3   | 3   | 3   | 3   | 3   |
| USA - New Mexico      | Other  | 3   | 3   | 3   | 10  | 3   | 3   | 3   | 3   | 3   |
| USA - New York        | Other  | 3   | 3   | 3   | 3   | 3   | 3   | 3   | 3   | 3   |
| USA - North Carolina  | Other  | 3   | 3   | 3   | 3   | 3   | 3   | 3   | 3   | 3   |
| USA - North Dakota    | Other  | 0   | 0   | 0   | 4   | 0   | 0   | 0   | 8   | 0   |
| USA - Ohio            | Other  | 3   | 3   | 3   | 3   | 3   | 3   | 3   | 3   | 3   |
| USA - Oklahoma        | Other  | 3   | 3   | 3   | 3   | 3   | 3   | 3   | 3   | 3   |
| USA - Oregon          | Other  | 3   | 3   | 3   | 6   | 3   | 3   | 3   | 4   | 3   |
| USA - Pennsylvania    | Other  | 3   | 3   | 3   | 4   | 3   | 3   | 3   | 3   | 3   |
| USA - Rhode Island    | Other  | 0   | 0   | 0   | 0   | 0   | 0   | 0   | 10  | 0   |
| USA - South Carolina  | Other  | 3   | 3   | 3   | 5   | 3   | 3   | 3   | 3   | 3   |
| USA - South Dakota    | Other  | 3   | 3   | 3   | 9   | 3   | 3   | 3   | 4   | 3   |
| USA - Tennessee       | Other  | 3   | 3   | 3   | 3   | 3   | 3   | 3   | 3   | 3   |
| USA - Texas           | Other  | 3   | 3   | 3   | 3   | 3   | 3   | 3   | 3   | 3   |
| USA - Vermont         | Other  | 0   | 0   | 0   | 12  | 0   | 0   | 0   | 1   | 0   |
| USA - Virginia        | Other  | 3   | 3   | 3   | 3   | 3   | 3   | 3   | 3   | 3   |
| USA - Washington      | Other  | 3   | 3   | 3   | 4   | 3   | 3   | 3   | 3   | 3   |
| USA - Washington, DC  | Other  | 3   | 3   | 3   | 3   | 3   | 3   | 3   | 3   | 3   |
| USA - West Virginia   | Other  | 3   | 3   | 3   | 4   | 3   | 3   | 3   | 3   | 3   |
| USA - Wisconsin       | Other  | 3   | 3   | 3   | 10  | 3   | 3   | 3   | 3   | 3   |
| USA - Wyoming         | Other  | 0   | 0   | 0   | 21  | 0   | 0   | 0   | 1   | 0   |
| Uganda                | DHS    | 45  | 45  | 45  | 45  | 45  | 45  | 45  | 45  | 45  |
| Uganda                | Other  | 9   | 9   | 9   | 9   | 9   | 9   | 9   | 9   | 9   |
| Ukraine               | MICS   | 3   | 3   | 3   | 3   | 3   | 3   | 3   | 3   | 3   |
| Ukraine               | Other  | 24  | 177 | 24  | 24  | 24  | 24  | 24  | 24  | 24  |
| Ukraine               | RHS    | 18  | 18  | 6   | 6   | 9   | 9   | 14  | 13  | 11  |
| Ukraine               | DHS    | 10  | 18  | 9   | 9   | 9   | 9   | 11  | 13  | 9   |
| Uruguay               | Other  | 3   | 3   | 3   | 3   | 3   | 3   | 3   | 3   | 3   |
| Uzbekistan            | MICS   | 3   | 3   | 3   | 3   | 3   | 3   | 3   | 3   | 3   |
| Uzbekistan            | DHS    | 15  | 15  | 15  | 15  | 15  | 15  | 15  | 15  | 15  |
| Uzbekistan            | Other  | 63  | 63  | 63  | 63  | 63  | 63  | 63  | 63  | 63  |
| Viet Nam              | DHS    | 15  | 15  | 15  | 15  | 15  | 15  | 15  | 15  | 15  |
| Viet Nam              | MICS   | 9   | 10  | 9   | 9   | 9   | 9   | 9   | 9   | 9   |
| Virgin Islands        | Other  | 6   | 6   | 7   | 9   | 6   | 7   | 6   | 6   | 14  |
| Yemen                 | WFS    | 6   | 6   | 6   | 6   | 6   | 6   | 6   | 6   | 6   |
| Yemen                 | DHS    | 24  | 24  | 24  | 24  | 24  | 24  | 24  | 24  | 24  |
| Yemen                 | Other  | 21  | 21  | 21  | 21  | 21  | 21  | 21  | 21  | 21  |
| Yemen                 | PAPFAM | 9   | 9   | 9   | 9   | 9   | 9   | 9   | 9   | 9   |
| Yemen                 | MICS   | 9   | 9   | 9   | 9   | 9   | 9   | 9   | 9   | 9   |
| Zambia                | DHS    | 60  | 60  | 60  | 60  | 60  | 60  | 60  | 60  | 60  |
| Zambia                | VR     | 3   | 3   | 3   | 3   | 3   | 3   | 3   | 3   | 3   |
| Zambia                | Other  | 3   | 3   | 3   | 3   | 3   | 3   | 3   | 3   | 3   |
| Zimbabwe              | DHS    | 54  | 54  | 54  | 54  | 54  | 54  | 54  | 54  | 54  |
| Zimbabwe              | MICS   | 18  | 18  | 18  | 18  | 18  | 18  | 18  | 18  | 18  |
| Zimbabwe              | Other  | 9   | 9   | 9   | 9   | 9   | 9   | 9   | 9   | 9   |

**Appendix Table S9: Distribution of empirical life tables by decade and GBD super-region, 1950–2021**

| Location                                         | Life Table Type        | 1950 - 1959 | 1960 - 1969 | 1970 - 1979 | 1980 - 1989 | 1990 - 1999 | 2000 - 2009 | 2010 - 2019 | 2020 - 2021 | All years |
|--------------------------------------------------|------------------------|-------------|-------------|-------------|-------------|-------------|-------------|-------------|-------------|-----------|
| Central Europe, eastern Europe, and central Asia | Total                  | 232         | 381         | 380         | 755         | 2311        | 2333        | 2004        | 446         | 8842      |
|                                                  | Location specific      | 206         | 282         | 307         | 617         | 1812        | 1919        | 1807        | 0           | 6950      |
|                                                  | Location-year specific | 0           | 0           | 0           | 0           | 0           | 0           | 0           | 446         | 446       |
| High income                                      | Universal              | 26          | 99          | 73          | 138         | 499         | 414         | 197         | 0           | 1446      |
|                                                  | Total                  | 889         | 1905        | 2339        | 4282        | 4403        | 4237        | 3506        | 1138        | 22699     |
|                                                  | Location specific      | 834         | 1735        | 1996        | 3101        | 2571        | 2935        | 2828        | 0           | 16000     |
| Latin America and Caribbean                      | Location-year specific | 0           | 0           | 0           | 0           | 0           | 0           | 0           | 1138        | 1138      |
|                                                  | Universal              | 55          | 170         | 343         | 1181        | 1832        | 1302        | 678         | 0           | 5561      |
|                                                  | Total                  | 256         | 316         | 423         | 1210        | 1371        | 1251        | 889         | 273         | 5989      |
| North Africa and Middle East                     | Location specific      | 229         | 299         | 407         | 1186        | 1333        | 1219        | 857         | 0           | 5530      |
|                                                  | Location-year specific | 0           | 0           | 0           | 0           | 0           | 0           | 0           | 273         | 273       |
|                                                  | Universal              | 27          | 17          | 16          | 24          | 38          | 32          | 32          | 0           | 186       |
| South Asia                                       | Total                  | 0           | 7           | 44          | 47          | 76          | 113         | 327         | 8           | 622       |
|                                                  | Location specific      | 0           | 7           | 44          | 47          | 76          | 113         | 327         | 0           | 614       |
|                                                  | Location-year specific | 0           | 0           | 0           | 0           | 0           | 0           | 0           | 8           | 8         |
| Southeast Asia, east Asia, and Oceania           | Universal              | 0           | 0           | 0           | 0           | 0           | 0           | 0           | 0           | 0         |
|                                                  | Total                  | 0           | 0           | 0           | 9           | 446         | 968         | 818         | 33          | 2274      |
|                                                  | Location specific      | 0           | 0           | 0           | 9           | 366         | 817         | 711         | 33          | 1936      |
| Sub-Saharan Africa                               | Location-year specific | 0           | 0           | 0           | 0           | 0           | 0           | 0           | 0           | 0         |
|                                                  | Universal              | 0           | 0           | 0           | 0           | 80          | 151         | 107         | 0           | 338       |
|                                                  | Total                  | 89          | 183         | 194         | 160         | 148         | 863         | 1049        | 184         | 2870      |
| All locations                                    | Location specific      | 83          | 165         | 184         | 152         | 141         | 725         | 975         | 2           | 2427      |
|                                                  | Location-year specific | 0           | 0           | 0           | 0           | 0           | 0           | 0           | 182         | 182       |
|                                                  | Universal              | 6           | 18          | 10          | 8           | 7           | 138         | 74          | 0           | 261       |
| All locations                                    | Total                  | 3           | 3           | 2           | 20          | 72          | 200         | 162         | 0           | 462       |
|                                                  | Location specific      | 3           | 3           | 2           | 20          | 72          | 200         | 162         | 0           | 462       |
|                                                  | Location-year specific | 0           | 0           | 0           | 0           | 0           | 0           | 0           | 0           | 0         |
| All locations                                    | Universal              | 0           | 0           | 0           | 0           | 0           | 0           | 0           | 0           | 0         |
|                                                  | Total                  | 1469        | 2795        | 3382        | 6483        | 8827        | 9965        | 8755        | 2082        | 43758     |
|                                                  | Location specific      | 1355        | 2491        | 2940        | 5132        | 6371        | 7928        | 7667        | 35          | 33919     |
| All locations                                    | Location-year specific | 0           | 0           | 0           | 0           | 0           | 0           | 0           | 2047        | 2047      |
|                                                  | Universal              | 114         | 304         | 442         | 1351        | 2456        | 2037        | 1088        | 0           | 7792      |

**Appendix Table S10: Locations by HIV estimation group**

| Group 1                  | Group 2A            | Group 2B                 | Group 2C                       |
|--------------------------|---------------------|--------------------------|--------------------------------|
| Angola                   | Antigua and Barbuda | Albania                  | Afghanistan                    |
| Benin                    | Argentina           | American Samoa           | Algeria                        |
| Botswana                 | Armenia             | Azerbaijan               | Andorra                        |
| Burkina Faso             | Australia           | Bahrain                  | Bangladesh                     |
| Burundi                  | Austria             | Bosnia and Herzegovina   | Bhutan                         |
| Cabo Verde               | Barbados            | Brunei                   | Bolivia                        |
| Cambodia                 | Belarus             | China                    | Comoros                        |
| Cameroon                 | Belgium             | Cyprus                   | Cook Islands                   |
| Central African Republic | Belize              | Egypt                    | Federated States of Micronesia |
| Chad                     | Bermuda             | El Salvador              | Laos                           |
| Congo (Brazzaville)      | Brazil              | Fiji                     | Lebanon                        |
| Côte d'Ivoire            | Bulgaria            | Greenland                | Libya                          |
| DR Congo                 | Canada              | Guam                     | Marshall Islands               |
| Djibouti                 | Chile               | Honduras                 | Monaco                         |
| Dominican Republic       | Colombia            | Indonesia                | Morocco                        |
| Equatorial Guinea        | Costa Rica          | Iran                     | Nauru                          |
| Eritrea                  | Croatia             | Iraq                     | Nepal                          |
| Eswatini                 | Cuba                | Jordan                   | Niue                           |
| Ethiopia                 | Czechia             | Kiribati                 | North Korea                    |
| Gabon                    | Denmark             | Malaysia                 | Pakistan                       |
| Ghana                    | Dominica            | Maldives                 | Palau                          |
| Guinea                   | Ecuador             | Mongolia                 | Saint Kitts and Nevis          |
| Guinea-Bissau            | Estonia             | Montenegro               | Samoa                          |
| Haiti                    | Finland             | Nicaragua                | San Marino                     |
| India                    | France              | North Macedonia          | Solomon Islands                |
| Kenya                    | Georgia             | Northern Mariana Islands | Timor-Leste                    |
| Lesotho                  | Germany             | Oman                     | Tokelau                        |
| Liberia                  | Greece              | Palestine                | Tunisia                        |
| Madagascar               | Grenada             | Paraguay                 | Tuvalu                         |
| Malawi                   | Guatemala           | Peru                     | United Arab Emirates           |
| Mali                     | Guyana              | Qatar                    | Vanuatu                        |
| Mauritania               | Hungary             | Saudi Arabia             | Yemen                          |
| Mozambique               | Iceland             | Serbia                   |                                |
| Myanmar                  | Ireland             | Seychelles               |                                |
| Namibia                  | Israel              | Slovakia                 |                                |
| Niger                    | Italy               | Sri Lanka                |                                |
| Nigeria                  | Jamaica             | Syria                    |                                |
| Papua New Guinea         | Japan               | Tajikistan               |                                |
| Rwanda                   | Kazakhstan          | Thailand                 |                                |
| Senegal                  | Kuwait              | Tonga                    |                                |
| Sierra Leone             | Kyrgyzstan          | Türkiye                  |                                |
| Somalia                  | Latvia              | Viet Nam                 |                                |
| South Africa             | Lithuania           |                          |                                |
| South Sudan              | Luxembourg          |                          |                                |



|                       |                                  |  |  |
|-----------------------|----------------------------------|--|--|
| Sudan                 | Malta                            |  |  |
| São Tomé and Príncipe | Mauritius                        |  |  |
| Tanzania              | Mexico                           |  |  |
| The Gambia            | Moldova                          |  |  |
| Togo                  | Netherlands                      |  |  |
| Uganda                | New Zealand                      |  |  |
| Zambia                | Norway                           |  |  |
| Zimbabwe              | Panama                           |  |  |
|                       | Philippines                      |  |  |
|                       | Poland                           |  |  |
|                       | Portugal                         |  |  |
|                       | Puerto Rico                      |  |  |
|                       | Romania                          |  |  |
|                       | Russia                           |  |  |
|                       | Saint Lucia                      |  |  |
|                       | Saint Vincent and the Grenadines |  |  |
|                       | Singapore                        |  |  |
|                       | Slovenia                         |  |  |
|                       | South Korea                      |  |  |
|                       | Spain                            |  |  |
|                       | Suriname                         |  |  |
|                       | Sweden                           |  |  |
|                       | Switzerland                      |  |  |
|                       | Taiwan (province of China)       |  |  |
|                       | The Bahamas                      |  |  |
|                       | Trinidad and Tobago              |  |  |
|                       | Turkmenistan                     |  |  |
|                       | UK                               |  |  |
|                       | USA                              |  |  |
|                       | Ukraine                          |  |  |
|                       | Uruguay                          |  |  |
|                       | Uzbekistan                       |  |  |
|                       | Venezuela                        |  |  |
|                       | Virgin Islands                   |  |  |

**Appendix Table S11. Number of sources used for the analysis of age-specific fertility by location**

| Location                 | Vital Registrations | Complete Birth Histories | Summary Birth Histories | Censuses | Other | Sample Registrations |
|--------------------------|---------------------|--------------------------|-------------------------|----------|-------|----------------------|
| Afghanistan              | 0                   | 3                        | 5                       | 0        | 0     | 0                    |
| Albania                  | 64                  | 2                        | 5                       | 1        | 0     | 0                    |
| Algeria                  | 61                  | 5                        | 0                       | 0        | 0     | 0                    |
| American Samoa           | 69                  | 0                        | 0                       | 2        | 0     | 0                    |
| Andorra                  | 50                  | 0                        | 0                       | 0        | 0     | 0                    |
| Angola                   | 23                  | 5                        | 4                       | 1        | 0     | 0                    |
| Antigua and Barbuda      | 62                  | 0                        | 0                       | 1        | 0     | 0                    |
| Argentina                | 66                  | 0                        | 0                       | 4        | 0     | 0                    |
| Armenia                  | 61                  | 4                        | 4                       | 2        | 0     | 0                    |
| Australia                | 71                  | 0                        | 0                       | 1        | 0     | 0                    |
| Austria                  | 71                  | 0                        | 0                       | 0        | 25    | 0                    |
| Azerbaijan               | 66                  | 3                        | 2                       | 1        | 0     | 0                    |
| Bahrain                  | 52                  | 1                        | 0                       | 2        | 0     | 0                    |
| Bangladesh               | 41                  | 15                       | 16                      | 2        | 0     | 0                    |
| Barbados                 | 64                  | 0                        | 0                       | 3        | 0     | 0                    |
| Belarus                  | 70                  | 0                        | 2                       | 2        | 0     | 0                    |
| Belgium                  | 69                  | 0                        | 0                       | 0        | 0     | 0                    |
| Belize                   | 69                  | 2                        | 5                       | 4        | 0     | 0                    |
| Benin                    | 2                   | 6                        | 7                       | 2        | 0     | 0                    |
| Bermuda                  | 67                  | 0                        | 0                       | 2        | 0     | 0                    |
| Bhutan                   | 5                   | 1                        | 3                       | 2        | 0     | 0                    |
| Bolivia                  | 41                  | 7                        | 22                      | 4        | 0     | 0                    |
| Bosnia and Herzegovina   | 32                  | 1                        | 1                       | 0        | 1     | 0                    |
| Botswana                 | 20                  | 5                        | 6                       | 5        | 0     | 0                    |
| Brazil                   | 57                  | 4                        | 25                      | 7        | 0     | 0                    |
| Brunei                   | 61                  | 0                        | 0                       | 0        | 0     | 0                    |
| Bulgaria                 | 70                  | 0                        | 2                       | 0        | 0     | 0                    |
| Burkina Faso             | 0                   | 6                        | 9                       | 4        | 0     | 0                    |
| Burundi                  | 9                   | 6                        | 7                       | 1        | 0     | 0                    |
| Cabo Verde               | 47                  | 1                        | 2                       | 1        | 0     | 0                    |
| Cambodia                 | 1                   | 6                        | 8                       | 2        | 0     | 0                    |
| Cameroon                 | 0                   | 8                        | 8                       | 1        | 0     | 0                    |
| Canada                   | 69                  | 0                        | 0                       | 1        | 0     | 0                    |
| Central African Republic | 0                   | 2                        | 4                       | 2        | 0     | 0                    |
| Chad                     | 0                   | 5                        | 5                       | 0        | 0     | 0                    |
| Chile                    | 69                  | 0                        | 16                      | 4        | 3     | 0                    |
| Colombia                 | 65                  | 9                        | 9                       | 4        | 0     | 0                    |
| Comoros                  | 9                   | 2                        | 3                       | 3        | 0     | 0                    |
| Congo (Brazzaville)      | 1                   | 3                        | 4                       | 1        | 0     | 0                    |
| Cook Islands             | 46                  | 0                        | 0                       | 3        | 0     | 0                    |
| Costa Rica               | 72                  | 1                        | 3                       | 3        | 0     | 0                    |
| Croatia                  | 71                  | 0                        | 0                       | 2        | 1     | 0                    |
| Cuba                     | 69                  | 1                        | 3                       | 1        | 2     | 0                    |
| Cyprus                   | 69                  | 0                        | 0                       | 2        | 0     | 0                    |
| Czechia                  | 71                  | 0                        | 0                       | 2        | 0     | 0                    |
| Côte d'Ivoire            | 5                   | 6                        | 8                       | 2        | 0     | 0                    |
| DR Congo                 | 0                   | 2                        | 12                      | 0        | 0     | 0                    |
| Denmark                  | 72                  | 0                        | 0                       | 0        | 0     | 0                    |
| Djibouti                 | 28                  | 3                        | 3                       | 0        | 0     | 0                    |
| Dominica                 | 68                  | 0                        | 0                       | 2        | 0     | 0                    |
| Dominican Republic       | 55                  | 13                       | 10                      | 4        | 0     | 0                    |
| Ecuador                  | 70                  | 5                        | 5                       | 5        | 0     | 0                    |

|                                |    |    |    |   |    |    |
|--------------------------------|----|----|----|---|----|----|
| Egypt                          | 67 | 13 | 14 | 1 | 2  | 0  |
| El Salvador                    | 60 | 5  | 6  | 2 | 0  | 0  |
| Equatorial Guinea              | 17 | 1  | 1  | 0 | 0  | 0  |
| Eritrea                        | 0  | 3  | 2  | 0 | 0  | 0  |
| Estonia                        | 72 | 0  | 0  | 2 | 0  | 0  |
| Eswatini                       | 6  | 3  | 3  | 4 | 0  | 0  |
| Ethiopia                       | 0  | 10 | 6  | 2 | 0  | 0  |
| Federated States of Micronesia | 8  | 0  | 0  | 4 | 0  | 0  |
| Fiji                           | 58 | 2  | 1  | 5 | 0  | 0  |
| Finland                        | 72 | 0  | 0  | 2 | 0  | 0  |
| France                         | 71 | 0  | 0  | 0 | 0  | 0  |
| Gabon                          | 0  | 1  | 2  | 1 | 0  | 0  |
| Georgia                        | 58 | 1  | 5  | 0 | 0  | 0  |
| Germany                        | 70 | 0  | 0  | 0 | 2  | 0  |
| Ghana                          | 28 | 14 | 22 | 3 | 0  | 0  |
| Greece                         | 71 | 0  | 0  | 1 | 4  | 0  |
| Greenland                      | 72 | 0  | 0  | 0 | 0  | 0  |
| Grenada                        | 43 | 0  | 0  | 2 | 0  | 0  |
| Guam                           | 70 | 0  | 0  | 0 | 0  | 0  |
| Guatemala                      | 50 | 6  | 8  | 0 | 3  | 0  |
| Guinea                         | 2  | 7  | 5  | 2 | 0  | 0  |
| Guinea-Bissau                  | 21 | 2  | 5  | 0 | 0  | 0  |
| Guyana                         | 39 | 6  | 7  | 3 | 0  | 0  |
| Haiti                          | 0  | 8  | 6  | 2 | 0  | 0  |
| Honduras                       | 40 | 8  | 6  | 3 | 0  | 0  |
| Hungary                        | 68 | 0  | 0  | 2 | 13 | 0  |
| Iceland                        | 72 | 0  | 0  | 1 | 0  | 0  |
| India                          | 67 | 31 | 14 | 4 | 2  | 28 |
| Indonesia                      | 14 | 14 | 42 | 5 | 1  | 0  |
| Iran                           | 70 | 0  | 2  | 4 | 0  | 0  |
| Iraq                           | 43 | 6  | 5  | 2 | 0  | 0  |
| Ireland                        | 72 | 0  | 0  | 1 | 0  | 0  |
| Israel                         | 71 | 0  | 0  | 0 | 0  | 0  |
| Italy                          | 71 | 0  | 0  | 0 | 0  | 0  |
| Jamaica                        | 61 | 3  | 6  | 3 | 2  | 0  |
| Japan                          | 68 | 0  | 0  | 0 | 0  | 0  |
| Jordan                         | 52 | 20 | 7  | 0 | 0  | 0  |
| Kazakhstan                     | 58 | 2  | 6  | 2 | 0  | 0  |
| Kenya                          | 52 | 12 | 16 | 6 | 1  | 0  |
| Kiribati                       | 18 | 2  | 1  | 5 | 0  | 0  |
| Kuwait                         | 62 | 2  | 0  | 1 | 0  | 0  |
| Kyrgyzstan                     | 58 | 4  | 6  | 2 | 0  | 0  |
| Laos                           | 1  | 4  | 3  | 1 | 0  | 0  |
| Latvia                         | 71 | 0  | 0  | 2 | 0  | 0  |
| Lebanon                        | 30 | 2  | 4  | 0 | 0  | 0  |
| Lesotho                        | 8  | 6  | 6  | 4 | 0  | 0  |
| Liberia                        | 4  | 8  | 6  | 2 | 0  | 0  |
| Libya                          | 48 | 1  | 2  | 0 | 0  | 0  |
| Lithuania                      | 72 | 0  | 0  | 1 | 0  | 0  |
| Luxembourg                     | 72 | 0  | 0  | 1 | 0  | 0  |
| Madagascar                     | 24 | 7  | 9  | 0 | 0  | 0  |
| Malawi                         | 6  | 13 | 12 | 4 | 0  | 0  |
| Malaysia                       | 63 | 1  | 1  | 2 | 4  | 0  |
| Maldives                       | 46 | 2  | 2  | 4 | 0  | 0  |
| Mali                           | 2  | 9  | 8  | 3 | 0  | 0  |

|                                  |    |    |    |   |    |   |
|----------------------------------|----|----|----|---|----|---|
| Malta                            | 71 | 0  | 0  | 0 | 0  | 0 |
| Marshall Islands                 | 26 | 1  | 0  | 2 | 0  | 0 |
| Mauritania                       | 1  | 7  | 6  | 1 | 0  | 0 |
| Mauritius                        | 71 | 0  | 0  | 2 | 0  | 0 |
| Mexico                           | 69 | 4  | 22 | 7 | 0  | 0 |
| Moldova                          | 57 | 2  | 3  | 1 | 0  | 0 |
| Monaco                           | 55 | 0  | 0  | 0 | 0  | 0 |
| Mongolia                         | 49 | 6  | 13 | 0 | 0  | 0 |
| Montenegro                       | 31 | 1  | 2  | 0 | 1  | 0 |
| Morocco                          | 27 | 10 | 7  | 3 | 0  | 0 |
| Mozambique                       | 29 | 6  | 7  | 5 | 0  | 0 |
| Myanmar                          | 10 | 6  | 2  | 1 | 0  | 0 |
| Namibia                          | 4  | 4  | 4  | 3 | 0  | 0 |
| Nauru                            | 31 | 1  | 0  | 2 | 0  | 0 |
| Nepal                            | 0  | 11 | 9  | 4 | 0  | 0 |
| Netherlands                      | 72 | 0  | 0  | 0 | 0  | 0 |
| New Zealand                      | 72 | 0  | 0  | 1 | 0  | 0 |
| Nicaragua                        | 56 | 5  | 7  | 3 | 0  | 0 |
| Niger                            | 2  | 5  | 7  | 1 | 0  | 0 |
| Nigeria                          | 2  | 14 | 22 | 2 | 0  | 0 |
| Niue                             | 68 | 0  | 0  | 4 | 0  | 0 |
| North Korea                      | 2  | 2  | 0  | 1 | 0  | 0 |
| North Macedonia                  | 36 | 0  | 2  | 2 | 1  | 0 |
| Northern Mariana Islands         | 14 | 0  | 0  | 0 | 0  | 0 |
| Norway                           | 71 | 0  | 0  | 0 | 0  | 0 |
| Oman                             | 18 | 2  | 0  | 0 | 0  | 0 |
| Pakistan                         | 18 | 36 | 12 | 1 | 1  | 1 |
| Palau                            | 11 | 0  | 0  | 3 | 0  | 0 |
| Palestine                        | 24 | 4  | 6  | 1 | 0  | 0 |
| Panama                           | 70 | 1  | 4  | 5 | 3  | 0 |
| Papua New Guinea                 | 4  | 4  | 2  | 3 | 0  | 0 |
| Paraguay                         | 43 | 6  | 8  | 4 | 6  | 0 |
| Peru                             | 65 | 15 | 21 | 1 | 2  | 0 |
| Philippines                      | 70 | 18 | 7  | 3 | 3  | 0 |
| Poland                           | 71 | 0  | 0  | 0 | 6  | 0 |
| Portugal                         | 68 | 1  | 0  | 1 | 2  | 0 |
| Puerto Rico                      | 60 | 0  | 0  | 1 | 0  | 0 |
| Qatar                            | 51 | 2  | 0  | 1 | 0  | 0 |
| Romania                          | 70 | 0  | 0  | 3 | 17 | 0 |
| Russia                           | 72 | 0  | 0  | 1 | 0  | 0 |
| Rwanda                           | 18 | 11 | 10 | 3 | 0  | 0 |
| Saint Kitts and Nevis            | 62 | 1  | 0  | 2 | 0  | 0 |
| Saint Lucia                      | 55 | 0  | 0  | 2 | 0  | 0 |
| Saint Vincent and the Grenadines | 66 | 0  | 0  | 2 | 0  | 0 |
| Samoa                            | 38 | 5  | 0  | 1 | 0  | 0 |
| San Marino                       | 57 | 0  | 0  | 0 | 0  | 0 |
| Saudi Arabia                     | 11 | 1  | 1  | 0 | 0  | 0 |
| Senegal                          | 3  | 16 | 14 | 3 | 0  | 0 |
| Serbia                           | 64 | 0  | 7  | 0 | 1  | 0 |
| Seychelles                       | 69 | 0  | 0  | 1 | 0  | 0 |
| Sierra Leone                     | 13 | 6  | 6  | 1 | 0  | 0 |
| Singapore                        | 72 | 0  | 0  | 1 | 0  | 0 |
| Slovakia                         | 72 | 0  | 1  | 1 | 0  | 0 |
| Slovenia                         | 69 | 0  | 0  | 2 | 1  | 0 |
| Solomon Islands                  | 1  | 2  | 0  | 4 | 0  | 0 |

|                            |    |    |    |   |    |   |
|----------------------------|----|----|----|---|----|---|
| Somalia                    | 0  | 2  | 3  | 0 | 0  | 0 |
| South Africa               | 30 | 3  | 13 | 2 | 0  | 0 |
| South Korea                | 52 | 1  | 1  | 8 | 22 | 0 |
| South Sudan                | 0  | 1  | 1  | 1 | 0  | 0 |
| Spain                      | 71 | 0  | 0  | 0 | 0  | 0 |
| Sri Lanka                  | 70 | 11 | 3  | 2 | 12 | 0 |
| Sudan                      | 4  | 6  | 5  | 3 | 0  | 0 |
| Suriname                   | 57 | 0  | 2  | 1 | 0  | 0 |
| Sweden                     | 72 | 0  | 0  | 0 | 0  | 0 |
| Switzerland                | 71 | 0  | 0  | 0 | 0  | 0 |
| Syria                      | 56 | 3  | 6  | 1 | 0  | 0 |
| São Tomé and Príncipe      | 44 | 2  | 4  | 2 | 0  | 0 |
| Taiwan (province of China) | 72 | 0  | 0  | 0 | 0  | 0 |
| Tajikistan                 | 56 | 3  | 5  | 1 | 0  | 0 |
| Tanzania                   | 1  | 10 | 12 | 1 | 1  | 0 |
| Thailand                   | 68 | 9  | 9  | 4 | 1  | 0 |
| The Bahamas                | 68 | 0  | 0  | 3 | 0  | 0 |
| The Gambia                 | 0  | 4  | 5  | 3 | 0  | 0 |
| Timor-Leste                | 19 | 5  | 16 | 0 | 0  | 0 |
| Togo                       | 1  | 4  | 7  | 1 | 0  | 0 |
| Tokelau                    | 18 | 0  | 0  | 1 | 0  | 0 |
| Tonga                      | 52 | 1  | 1  | 3 | 0  | 0 |
| Trinidad and Tobago        | 67 | 2  | 5  | 2 | 2  | 0 |
| Tunisia                    | 70 | 6  | 7  | 0 | 0  | 0 |
| Turkmenistan               | 35 | 3  | 3  | 0 | 0  | 0 |
| Tuvalu                     | 9  | 2  | 0  | 1 | 0  | 0 |
| Türkiye                    | 31 | 10 | 8  | 6 | 0  | 0 |
| UK                         | 71 | 0  | 0  | 0 | 0  | 0 |
| USA                        | 70 | 0  | 0  | 1 | 0  | 0 |
| Uganda                     | 1  | 8  | 17 | 2 | 1  | 0 |
| Ukraine                    | 71 | 2  | 4  | 2 | 0  | 0 |
| United Arab Emirates       | 44 | 2  | 0  | 1 | 0  | 0 |
| Uruguay                    | 60 | 0  | 5  | 5 | 0  | 0 |
| Uzbekistan                 | 54 | 3  | 4  | 0 | 0  | 0 |
| Vanuatu                    | 3  | 1  | 1  | 4 | 0  | 0 |
| Venezuela                  | 65 | 2  | 0  | 2 | 0  | 0 |
| Viet Nam                   | 5  | 11 | 10 | 3 | 0  | 0 |
| Virgin Islands             | 49 | 0  | 0  | 0 | 0  | 0 |
| Yemen                      | 9  | 6  | 6  | 1 | 0  | 0 |
| Zambia                     | 3  | 6  | 10 | 5 | 1  | 0 |
| Zimbabwe                   | 1  | 10 | 9  | 3 | 0  | 0 |

**Appendix Table S12. Number of sources used for the analysis of age-specific fertility by year**

| Year | Vital Registrations | Complete Birth Histories | Summary Birth Histories | Censuses | Other | Sample Registrations |
|------|---------------------|--------------------------|-------------------------|----------|-------|----------------------|
| 1950 | 116                 | 0                        | 0                       | 4        | 4     | 0                    |
| 1951 | 123                 | 0                        | 0                       | 0        | 2     | 0                    |
| 1952 | 122                 | 0                        | 0                       | 0        | 1     | 0                    |
| 1953 | 122                 | 0                        | 0                       | 1        | 3     | 0                    |
| 1954 | 121                 | 0                        | 0                       | 1        | 1     | 0                    |
| 1955 | 125                 | 0                        | 0                       | 0        | 2     | 0                    |
| 1956 | 120                 | 0                        | 0                       | 0        | 2     | 0                    |
| 1957 | 125                 | 0                        | 0                       | 1        | 3     | 0                    |
| 1958 | 126                 | 0                        | 0                       | 0        | 3     | 0                    |
| 1959 | 128                 | 0                        | 0                       | 0        | 3     | 0                    |
| 1960 | 113                 | 0                        | 0                       | 7        | 11    | 0                    |
| 1961 | 120                 | 0                        | 0                       | 2        | 5     | 0                    |
| 1962 | 126                 | 0                        | 0                       | 1        | 5     | 0                    |
| 1963 | 128                 | 1                        | 0                       | 1        | 5     | 0                    |
| 1964 | 130                 | 1                        | 0                       | 1        | 7     | 0                    |
| 1965 | 123                 | 1                        | 0                       | 0        | 8     | 0                    |
| 1966 | 117                 | 1                        | 0                       | 4        | 5     | 0                    |
| 1967 | 120                 | 0                        | 0                       | 1        | 5     | 0                    |
| 1968 | 119                 | 1                        | 0                       | 1        | 6     | 0                    |
| 1969 | 117                 | 0                        | 0                       | 2        | 10    | 0                    |
| 1970 | 112                 | 2                        | 0                       | 10       | 16    | 0                    |
| 1971 | 121                 | 3                        | 0                       | 6        | 4     | 1                    |
| 1972 | 118                 | 0                        | 0                       | 1        | 10    | 0                    |
| 1973 | 114                 | 1                        | 0                       | 7        | 2     | 0                    |
| 1974 | 118                 | 5                        | 3                       | 6        | 1     | 0                    |
| 1975 | 116                 | 9                        | 7                       | 5        | 3     | 0                    |
| 1976 | 115                 | 9                        | 5                       | 5        | 1     | 1                    |
| 1977 | 114                 | 7                        | 4                       | 1        | 1     | 0                    |
| 1978 | 118                 | 10                       | 5                       | 1        | 1     | 0                    |
| 1979 | 128                 | 6                        | 2                       | 1        | 1     | 0                    |
| 1980 | 120                 | 5                        | 3                       | 18       | 2     | 0                    |
| 1981 | 123                 | 4                        | 5                       | 7        | 1     | 1                    |
| 1982 | 122                 | 2                        | 0                       | 6        | 1     | 0                    |
| 1983 | 125                 | 4                        | 3                       | 3        | 1     | 0                    |
| 1984 | 124                 | 8                        | 1                       | 2        | 1     | 0                    |
| 1985 | 129                 | 5                        | 3                       | 6        | 2     | 0                    |
| 1986 | 129                 | 8                        | 7                       | 9        | 1     | 1                    |
| 1987 | 128                 | 20                       | 13                      | 4        | 1     | 0                    |
| 1988 | 125                 | 10                       | 14                      | 6        | 1     | 0                    |
| 1989 | 123                 | 5                        | 4                       | 11       | 1     | 0                    |
| 1990 | 128                 | 10                       | 7                       | 28       | 1     | 0                    |
| 1991 | 127                 | 19                       | 12                      | 23       | 1     | 1                    |
| 1992 | 127                 | 13                       | 17                      | 8        | 1     | 0                    |
| 1993 | 122                 | 12                       | 16                      | 5        | 1     | 0                    |

|      |     |    |    |    |   |   |
|------|-----|----|----|----|---|---|
| 1994 | 118 | 11 | 16 | 5  | 1 | 0 |
| 1995 | 113 | 13 | 17 | 4  | 1 | 0 |
| 1996 | 112 | 24 | 19 | 9  | 0 | 1 |
| 1997 | 104 | 19 | 21 | 4  | 0 | 0 |
| 1998 | 101 | 18 | 28 | 4  | 0 | 0 |
| 1999 | 102 | 17 | 22 | 9  | 1 | 1 |
| 2000 | 109 | 20 | 63 | 21 | 0 | 1 |
| 2001 | 108 | 13 | 20 | 20 | 0 | 1 |
| 2002 | 116 | 12 | 16 | 13 | 0 | 1 |
| 2003 | 119 | 17 | 22 | 2  | 0 | 1 |
| 2004 | 114 | 15 | 21 | 2  | 0 | 1 |
| 2005 | 120 | 22 | 37 | 6  | 0 | 2 |
| 2006 | 115 | 33 | 55 | 6  | 0 | 1 |
| 2007 | 119 | 25 | 30 | 6  | 0 | 1 |
| 2008 | 121 | 21 | 27 | 7  | 0 | 1 |
| 2009 | 119 | 18 | 22 | 7  | 0 | 1 |
| 2010 | 121 | 22 | 38 | 11 | 0 | 1 |
| 2011 | 122 | 22 | 36 | 14 | 0 | 1 |
| 2012 | 144 | 28 | 39 | 5  | 0 | 1 |
| 2013 | 140 | 21 | 30 | 2  | 0 | 1 |
| 2014 | 140 | 35 | 44 | 1  | 0 | 1 |
| 2015 | 140 | 22 | 32 | 2  | 0 | 1 |
| 2016 | 145 | 23 | 37 | 1  | 0 | 1 |
| 2017 | 141 | 25 | 31 | 2  | 0 | 1 |
| 2018 | 134 | 19 | 16 | 1  | 0 | 1 |
| 2019 | 123 | 22 | 9  | 0  | 0 | 1 |
| 2020 | 107 | 7  | 0  | 0  | 0 | 1 |
| 2021 | 46  | 9  | 0  | 0  | 0 | 0 |
| 2022 | 0   | 2  | 0  | 0  | 0 | 0 |

**Appendix Table S13: List of all confirmed censuses by location and year**

| Location       | Year | Type     | Age Detail         | Enumeration Method | Included or Excluded from Estimation |
|----------------|------|----------|--------------------|--------------------|--------------------------------------|
| Afghanistan    | 1979 | Census   | 5-year age groups  | De facto           | Included                             |
| Albania        | 1950 | Census   | 5-year age groups  | De facto           | Included                             |
| Albania        | 1955 | Census   | 5-year age groups  | De facto           | Included                             |
| Albania        | 1960 | Census   | non-std age groups | De facto           | Included                             |
| Albania        | 1969 | Census   | all ages only      | De facto           | Included                             |
| Albania        | 1979 | Census   | all ages only      | De jure            | Included                             |
| Albania        | 1989 | Census   | all ages only      | De jure            | Included                             |
| Albania        | 2001 | Census   | 5-year age groups  | De facto           | Included                             |
| Albania        | 2011 | Census   | 5-year age groups  | De jure            | Included                             |
| Algeria        | 1954 | Census   | 5-year age groups  | Unknown            | Included                             |
| Algeria        | 1966 | Census   | 5-year age groups  | De jure            | Included                             |
| Algeria        | 1977 | Census   | 5-year age groups  | De jure            | Included                             |
| Algeria        | 1987 | Census   | 5-year age groups  | De jure            | Included                             |
| Algeria        | 1998 | Census   | 5-year age groups  | De jure            | Included                             |
| Algeria        | 2008 | Census   | 1-year age groups  | De jure            | Included                             |
| American Samoa | 1950 | Census   | 5-year age groups  | De jure            | Included                             |
| American Samoa | 1956 | Census   | 1-year age groups  | De jure            | Included                             |
| American Samoa | 1960 | Census   | 5-year age groups  | De jure            | Included                             |
| American Samoa | 1970 | Census   | 5-year age groups  | De jure            | Included                             |
| American Samoa | 1974 | Census   | 5-year age groups  | De jure            | Included                             |
| American Samoa | 1980 | Census   | 1-year age groups  | De jure            | Included                             |
| American Samoa | 1990 | Census   | 5-year age groups  | De jure            | Included                             |
| American Samoa | 2000 | Census   | 5-year age groups  | De jure            | Included                             |
| American Samoa | 2010 | Census   | 5-year age groups  | De jure            | Included                             |
| American Samoa | 2020 | Census   | 5-year age groups  | De jure            | Included                             |
| Andorra        | 1966 | Registry | non-std age groups | NA                 | Included                             |
| Andorra        | 1985 | Registry | 1-year age groups  | NA                 | Included                             |
| Andorra        | 1986 | Registry | 1-year age groups  | NA                 | Included                             |
| Andorra        | 1987 | Registry | 1-year age groups  | NA                 | Included                             |
| Andorra        | 1988 | Registry | 1-year age groups  | NA                 | Included                             |
| Andorra        | 1989 | Registry | 1-year age groups  | NA                 | Included                             |
| Andorra        | 1990 | Registry | 1-year age groups  | NA                 | Included                             |
| Andorra        | 1991 | Registry | 1-year age groups  | NA                 | Included                             |
| Andorra        | 1992 | Registry | 1-year age groups  | NA                 | Included                             |
| Andorra        | 1993 | Registry | 1-year age groups  | NA                 | Included                             |
| Andorra        | 1994 | Registry | 1-year age groups  | NA                 | Included                             |
| Andorra        | 1995 | Registry | 1-year age groups  | NA                 | Included                             |
| Andorra        | 1996 | Registry | 1-year age groups  | NA                 | Included                             |
| Andorra        | 1997 | Registry | 1-year age groups  | NA                 | Included                             |
| Andorra        | 1998 | Registry | 1-year age groups  | NA                 | Included                             |
| Andorra        | 1999 | Registry | 1-year age groups  | NA                 | Included                             |
| Andorra        | 2000 | Registry | 1-year age groups  | NA                 | Included                             |
| Andorra        | 2001 | Registry | 1-year age groups  | NA                 | Included                             |
| Andorra        | 2002 | Registry | 1-year age groups  | NA                 | Included                             |
| Andorra        | 2003 | Registry | 1-year age groups  | NA                 | Included                             |
| Andorra        | 2004 | Registry | 1-year age groups  | NA                 | Included                             |
| Andorra        | 2005 | Registry | 1-year age groups  | NA                 | Included                             |
| Andorra        | 2006 | Registry | 1-year age groups  | NA                 | Included                             |
| Andorra        | 2007 | Registry | 1-year age groups  | NA                 | Included                             |
| Andorra        | 2008 | Registry | 1-year age groups  | NA                 | Included                             |
| Andorra        | 2009 | Registry | 1-year age groups  | NA                 | Included                             |
| Andorra        | 2010 | Registry | 1-year age groups  | NA                 | Included                             |
| Andorra        | 2011 | Registry | 1-year age groups  | NA                 | Included                             |



|                     |      |          |                   |          |          |
|---------------------|------|----------|-------------------|----------|----------|
| Andorra             | 2012 | Registry | 1-year age groups | NA       | Included |
| Andorra             | 2013 | Registry | 1-year age groups | NA       | Included |
| Andorra             | 2014 | Registry | 1-year age groups | NA       | Included |
| Andorra             | 2015 | Registry | 1-year age groups | NA       | Included |
| Andorra             | 2016 | Registry | 1-year age groups | NA       | Included |
| Andorra             | 2017 | Registry | 1-year age groups | NA       | Included |
| Angola              | 1950 | Census   | 5-year age groups | De facto | Included |
| Angola              | 1960 | Census   | 5-year age groups | De jure  | Included |
| Angola              | 1970 | Census   | all ages only     | De facto | Included |
| Angola              | 2014 | Census   | 1-year age groups | De facto | Included |
| Antigua and Barbuda | 1960 | Census   | 1-year age groups | De facto | Included |
| Antigua and Barbuda | 1970 | Census   | 5-year age groups | De jure  | Included |
| Antigua and Barbuda | 1991 | Census   | 1-year age groups | De jure  | Included |
| Antigua and Barbuda | 2001 | Census   | 1-year age groups | De jure  | Included |
| Antigua and Barbuda | 2011 | Census   | 5-year age groups | De jure  | Included |
| Argentina           | 1960 | Census   | 1-year age groups | De facto | Included |
| Argentina           | 1970 | Census   | 1-year age groups | De facto | Included |
| Argentina           | 1980 | Census   | 1-year age groups | De facto | Included |
| Argentina           | 1991 | Census   | 1-year age groups | De facto | Included |
| Argentina           | 2001 | Census   | 1-year age groups | De facto | Included |
| Argentina           | 2010 | Census   | 1-year age groups | De facto | Included |
| Armenia             | 1959 | Census   | 5-year age groups | De facto | Included |
| Armenia             | 1970 | Census   | 5-year age groups | De facto | Included |
| Armenia             | 1979 | Census   | 5-year age groups | De facto | Included |
| Armenia             | 1989 | Census   | 5-year age groups | De jure  | Included |
| Armenia             | 2001 | Census   | 1-year age groups | De jure  | Included |
| Armenia             | 2011 | Census   | 1-year age groups | De jure  | Included |
| Australia           | 1954 | Census   | 5-year age groups | De facto | Included |
| Australia           | 1961 | Census   | 1-year age groups | De facto | Included |
| Australia           | 1966 | Census   | 5-year age groups | De facto | Included |
| Australia           | 1971 | Census   | 1-year age groups | De facto | Included |
| Australia           | 1976 | Census   | 5-year age groups | De facto | Included |
| Australia           | 1981 | Census   | 5-year age groups | De facto | Included |
| Australia           | 1986 | Census   | 1-year age groups | De facto | Included |
| Australia           | 1991 | Census   | 1-year age groups | De facto | Included |
| Australia           | 1996 | Census   | 1-year age groups | De facto | Included |
| Australia           | 2001 | Census   | 1-year age groups | De jure  | Included |
| Australia           | 2006 | Census   | 1-year age groups | De jure  | Included |
| Australia           | 2011 | Census   | 1-year age groups | De jure  | Included |
| Australia           | 2016 | Census   | 5-year age groups | De jure  | Excluded |
| Australia           | 2021 | Census   | 5-year age groups | De jure  | Included |
| Austria             | 1951 | Census   | 1-year age groups | De jure  | Included |
| Austria             | 1961 | Census   | 1-year age groups | De jure  | Included |
| Austria             | 1971 | Census   | 1-year age groups | De jure  | Included |
| Austria             | 1981 | Census   | 1-year age groups | De jure  | Included |
| Austria             | 1991 | Census   | 1-year age groups | De jure  | Included |
| Austria             | 2001 | Census   | 1-year age groups | De jure  | Included |
| Austria             | 2002 | Registry | 5-year age groups | NA       | Included |
| Austria             | 2003 | Registry | 5-year age groups | NA       | Included |
| Austria             | 2004 | Registry | 5-year age groups | NA       | Included |
| Austria             | 2005 | Registry | 5-year age groups | NA       | Included |
| Austria             | 2006 | Registry | 5-year age groups | NA       | Included |
| Austria             | 2007 | Registry | 5-year age groups | NA       | Included |
| Austria             | 2008 | Registry | 5-year age groups | NA       | Included |
| Austria             | 2009 | Registry | 5-year age groups | NA       | Included |
| Austria             | 2010 | Registry | 5-year age groups | NA       | Included |

|            |      |          |                    |          |          |
|------------|------|----------|--------------------|----------|----------|
| Austria    | 2011 | Registry | 5-year age groups  | NA       | Included |
| Austria    | 2012 | Registry | 5-year age groups  | NA       | Included |
| Austria    | 2013 | Registry | 5-year age groups  | NA       | Included |
| Austria    | 2014 | Registry | 5-year age groups  | NA       | Included |
| Austria    | 2015 | Registry | 5-year age groups  | NA       | Included |
| Austria    | 2016 | Registry | 5-year age groups  | NA       | Included |
| Austria    | 2017 | Registry | 5-year age groups  | NA       | Included |
| Azerbaijan | 1959 | Census   | 5-year age groups  | De facto | Included |
| Azerbaijan | 1970 | Census   | 5-year age groups  | De facto | Included |
| Azerbaijan | 1979 | Census   | 5-year age groups  | De facto | Included |
| Azerbaijan | 1989 | Census   | 5-year age groups  | De jure  | Included |
| Azerbaijan | 1999 | Census   | 1-year age groups  | De jure  | Included |
| Azerbaijan | 2009 | Census   | 1-year age groups  | De jure  | Included |
| Bahrain    | 1950 | Census   | all ages only      | De facto | Included |
| Bahrain    | 1959 | Census   | non-std age groups | De facto | Included |
| Bahrain    | 1965 | Census   | non-std age groups | De facto | Included |
| Bahrain    | 1971 | Census   | 1-year age groups  | De facto | Included |
| Bahrain    | 1981 | Census   | 5-year age groups  | De facto | Included |
| Bahrain    | 1991 | Census   | 5-year age groups  | De jure  | Excluded |
| Bahrain    | 2001 | Census   | 1-year age groups  | De jure  | Included |
| Bahrain    | 2010 | Census   | 1-year age groups  | De jure  | Included |
| Bahrain    | 2020 | Census   | 5-year age groups  | Unknown  | Included |
| Bangladesh | 1951 | Census   | non-std age groups | De jure  | Included |
| Bangladesh | 1961 | Census   | 5-year age groups  | De jure  | Included |
| Bangladesh | 1974 | Census   | 5-year age groups  | De facto | Included |
| Bangladesh | 1981 | Census   | 5-year age groups  | De facto | Included |
| Bangladesh | 1991 | Census   | 1-year age groups  | De facto | Included |
| Bangladesh | 2001 | Census   | 1-year age groups  | De facto | Included |
| Bangladesh | 2011 | Census   | 5-year age groups  | De facto | Included |
| Barbados   | 1960 | Census   | 1-year age groups  | De facto | Included |
| Barbados   | 1970 | Census   | 1-year age groups  | De facto | Included |
| Barbados   | 1980 | Census   | 1-year age groups  | De facto | Included |
| Barbados   | 1990 | Census   | 5-year age groups  | De jure  | Included |
| Barbados   | 2000 | Census   | 1-year age groups  | De facto | Included |
| Barbados   | 2010 | Census   | 5-year age groups  | De jure  | Included |
| Belarus    | 1959 | Census   | 5-year age groups  | De facto | Included |
| Belarus    | 1970 | Census   | 5-year age groups  | De facto | Included |
| Belarus    | 1979 | Census   | 5-year age groups  | De facto | Included |
| Belarus    | 1989 | Census   | 1-year age groups  | De jure  | Included |
| Belarus    | 1999 | Census   | 1-year age groups  | De jure  | Included |
| Belarus    | 2009 | Census   | 1-year age groups  | De jure  | Included |
| Belgium    | 1961 | Census   | 1-year age groups  | De jure  | Included |
| Belgium    | 1970 | Census   | 1-year age groups  | De jure  | Included |
| Belgium    | 1981 | Census   | 1-year age groups  | De jure  | Included |
| Belgium    | 1991 | Census   | 5-year age groups  | De jure  | Included |
| Belgium    | 2001 | Census   | 1-year age groups  | De jure  | Included |
| Belgium    | 2010 | Registry | 1-year age groups  | NA       | Included |
| Belgium    | 2011 | Census   | 1-year age groups  | De jure  | Excluded |
| Belgium    | 2012 | Registry | 1-year age groups  | NA       | Included |
| Belgium    | 2013 | Registry | 1-year age groups  | NA       | Included |
| Belgium    | 2014 | Registry | 1-year age groups  | NA       | Included |
| Belgium    | 2015 | Registry | 1-year age groups  | NA       | Included |
| Belgium    | 2016 | Registry | 1-year age groups  | NA       | Included |
| Belgium    | 2017 | Registry | 1-year age groups  | NA       | Included |
| Belize     | 1960 | Census   | 5-year age groups  | De facto | Included |
| Belize     | 1970 | Census   | 1-year age groups  | De facto | Included |

|                        |      |          |                    |          |          |
|------------------------|------|----------|--------------------|----------|----------|
| Belize                 | 1980 | Census   | 1-year age groups  | De facto | Included |
| Belize                 | 1991 | Census   | 1-year age groups  | De facto | Included |
| Belize                 | 2000 | Census   | non-std age groups | De jure  | Included |
| Belize                 | 2010 | Census   | 5-year age groups  | De jure  | Included |
| Benin                  | 1979 | Census   | 5-year age groups  | De facto | Included |
| Benin                  | 1992 | Census   | 1-year age groups  | De facto | Included |
| Benin                  | 2002 | Census   | 1-year age groups  | De jure  | Included |
| Benin                  | 2013 | Census   | 5-year age groups  | De jure  | Included |
| Bermuda                | 1950 | Census   | 1-year age groups  | De jure  | Included |
| Bermuda                | 1960 | Census   | 1-year age groups  | De jure  | Included |
| Bermuda                | 1970 | Census   | 1-year age groups  | De jure  | Included |
| Bermuda                | 1980 | Census   | 1-year age groups  | De jure  | Included |
| Bermuda                | 1991 | Census   | 1-year age groups  | De jure  | Included |
| Bermuda                | 2000 | Census   | 1-year age groups  | De jure  | Included |
| Bermuda                | 2010 | Census   | 1-year age groups  | De jure  | Included |
| Bermuda                | 2016 | Census   | 1-year age groups  | De jure  | Excluded |
| Bhutan                 | 2005 | Census   | 1-year age groups  | De facto | Included |
| Bhutan                 | 2017 | Census   | 1-year age groups  | De facto | Included |
| Bolivia                | 1950 | Census   | 5-year age groups  | De facto | Excluded |
| Bolivia                | 1976 | Census   | 5-year age groups  | De facto | Included |
| Bolivia                | 1992 | Census   | 1-year age groups  | De facto | Included |
| Bolivia                | 2001 | Census   | 1-year age groups  | De facto | Included |
| Bolivia                | 2012 | Census   | 1-year age groups  | De facto | Included |
| Bosnia and Herzegovina | 1971 | Census   | 5-year age groups  | De jure  | Excluded |
| Bosnia and Herzegovina | 1981 | Census   | 5-year age groups  | De jure  | Included |
| Bosnia and Herzegovina | 1991 | Census   | 1-year age groups  | De jure  | Included |
| Bosnia and Herzegovina | 2013 | Census   | 1-year age groups  | De jure  | Included |
| Botswana               | 1964 | Census   | 1-year age groups  | De facto | Included |
| Botswana               | 1971 | Census   | 1-year age groups  | De facto | Excluded |
| Botswana               | 1981 | Census   | 1-year age groups  | De facto | Included |
| Botswana               | 1991 | Census   | 1-year age groups  | De facto | Included |
| Botswana               | 2001 | Census   | 5-year age groups  | De facto | Included |
| Botswana               | 2011 | Census   | 1-year age groups  | De facto | Included |
| Brazil                 | 1950 | Census   | 1-year age groups  | De facto | Included |
| Brazil                 | 1960 | Census   | 1-year age groups  | De facto | Included |
| Brazil                 | 1970 | Census   | 1-year age groups  | De facto | Included |
| Brazil                 | 1980 | Census   | 1-year age groups  | De jure  | Included |
| Brazil                 | 1991 | Census   | 1-year age groups  | De jure  | Included |
| Brazil                 | 1996 | Census   | 5-year age groups  | De jure  | Excluded |
| Brazil                 | 2000 | Census   | 1-year age groups  | De jure  | Included |
| Brazil                 | 2010 | Census   | 1-year age groups  | De jure  | Included |
| Brunei                 | 1960 | Census   | 5-year age groups  | De facto | Included |
| Brunei                 | 1971 | Census   | 1-year age groups  | De facto | Included |
| Brunei                 | 1981 | Census   | 1-year age groups  | De facto | Included |
| Brunei                 | 1991 | Census   | 1-year age groups  | De facto | Included |
| Brunei                 | 2001 | Census   | 5-year age groups  | De facto | Included |
| Brunei                 | 2011 | Census   | 1-year age groups  | De jure  | Included |
| Bulgaria               | 1956 | Census   | 5-year age groups  | De facto | Included |
| Bulgaria               | 1965 | Census   | 5-year age groups  | De facto | Included |
| Bulgaria               | 1975 | Census   | 5-year age groups  | De facto | Included |
| Bulgaria               | 1985 | Census   | 5-year age groups  | De jure  | Included |
| Bulgaria               | 1992 | Census   | 5-year age groups  | De jure  | Included |
| Bulgaria               | 2001 | Census   | 5-year age groups  | De jure  | Excluded |
| Bulgaria               | 2002 | Registry | 5-year age groups  | NA       | Included |
| Bulgaria               | 2003 | Registry | 5-year age groups  | NA       | Included |
| Bulgaria               | 2004 | Registry | 5-year age groups  | NA       | Included |

|                          |      |          |                    |          |          |
|--------------------------|------|----------|--------------------|----------|----------|
| Bulgaria                 | 2005 | Registry | 5-year age groups  | NA       | Included |
| Bulgaria                 | 2006 | Registry | 5-year age groups  | NA       | Included |
| Bulgaria                 | 2007 | Registry | 5-year age groups  | NA       | Included |
| Bulgaria                 | 2008 | Registry | 5-year age groups  | NA       | Included |
| Bulgaria                 | 2009 | Registry | 5-year age groups  | NA       | Included |
| Bulgaria                 | 2010 | Registry | 5-year age groups  | NA       | Included |
| Bulgaria                 | 2011 | Registry | 5-year age groups  | NA       | Included |
| Bulgaria                 | 2012 | Registry | 5-year age groups  | NA       | Included |
| Bulgaria                 | 2013 | Registry | 5-year age groups  | NA       | Included |
| Bulgaria                 | 2014 | Registry | 5-year age groups  | NA       | Included |
| Bulgaria                 | 2015 | Registry | 5-year age groups  | NA       | Included |
| Bulgaria                 | 2016 | Registry | 5-year age groups  | NA       | Included |
| Burkina Faso             | 1975 | Census   | 5-year age groups  | De jure  | Excluded |
| Burkina Faso             | 1985 | Census   | 1-year age groups  | De jure  | Included |
| Burkina Faso             | 1996 | Census   | 1-year age groups  | De jure  | Included |
| Burkina Faso             | 2006 | Census   | 1-year age groups  | De jure  | Included |
| Burkina Faso             | 2019 | Census   | 5-year age groups  | De jure  | Included |
| Burundi                  | 1979 | Census   | 5-year age groups  | De jure  | Included |
| Burundi                  | 1990 | Census   | 1-year age groups  | De jure  | Included |
| Burundi                  | 2008 | Census   | 1-year age groups  | De jure  | Included |
| Cabo Verde               | 1950 | Census   | non-std age groups | De facto | Included |
| Cabo Verde               | 1960 | Census   | non-std age groups | De facto | Included |
| Cabo Verde               | 1970 | Census   | 5-year age groups  | De facto | Included |
| Cabo Verde               | 1980 | Census   | 5-year age groups  | De jure  | Included |
| Cabo Verde               | 1990 | Census   | 1-year age groups  | De facto | Included |
| Cabo Verde               | 2000 | Census   | 5-year age groups  | De facto | Included |
| Cabo Verde               | 2010 | Census   | 1-year age groups  | De jure  | Included |
| Cambodia                 | 1962 | Census   | 1-year age groups  | De facto | Included |
| Cambodia                 | 1998 | Census   | 1-year age groups  | De facto | Included |
| Cambodia                 | 2008 | Census   | 1-year age groups  | De facto | Included |
| Cambodia                 | 2019 | Census   | 1-year age groups  | De facto | Excluded |
| Cameroon                 | 1976 | Census   | 5-year age groups  | De jure  | Included |
| Cameroon                 | 1987 | Census   | 1-year age groups  | Unknown  | Included |
| Cameroon                 | 2005 | Census   | 1-year age groups  | De jure  | Included |
| Canada                   | 1951 | Census   | 5-year age groups  | De jure  | Included |
| Canada                   | 1956 | Census   | 1-year age groups  | De jure  | Included |
| Canada                   | 1961 | Census   | 5-year age groups  | De jure  | Included |
| Canada                   | 1966 | Census   | 5-year age groups  | De jure  | Included |
| Canada                   | 1971 | Census   | 5-year age groups  | De jure  | Included |
| Canada                   | 1976 | Census   | 5-year age groups  | De jure  | Included |
| Canada                   | 1981 | Census   | 1-year age groups  | De jure  | Included |
| Canada                   | 1986 | Census   | 5-year age groups  | De jure  | Included |
| Canada                   | 1991 | Census   | 1-year age groups  | De jure  | Included |
| Canada                   | 1996 | Census   | 1-year age groups  | De jure  | Included |
| Canada                   | 2001 | Census   | 1-year age groups  | De jure  | Included |
| Canada                   | 2006 | Census   | 1-year age groups  | De jure  | Included |
| Canada                   | 2011 | Census   | 1-year age groups  | De jure  | Included |
| Canada                   | 2016 | Census   | 1-year age groups  | De jure  | Included |
| Canada                   | 2021 | Census   | 1-year age groups  | De jure  | Included |
| Central African Republic | 1975 | Census   | 5-year age groups  | De facto | Included |
| Central African Republic | 1988 | Census   | 1-year age groups  | De facto | Included |
| Central African Republic | 2003 | Census   | 5-year age groups  | De facto | Included |
| Chad                     | 1993 | Census   | 5-year age groups  | De jure  | Included |
| Chad                     | 2009 | Census   | 5-year age groups  | De jure  | Included |
| Chile                    | 1952 | Census   | 5-year age groups  | De facto | Included |
| Chile                    | 1960 | Census   | 5-year age groups  | De facto | Included |

|                     |      |        |                    |          |          |
|---------------------|------|--------|--------------------|----------|----------|
| Chile               | 1970 | Census | 1-year age groups  | De facto | Included |
| Chile               | 1982 | Census | 1-year age groups  | De facto | Included |
| Chile               | 1992 | Census | 1-year age groups  | De facto | Included |
| Chile               | 2002 | Census | 5-year age groups  | De facto | Included |
| Chile               | 2012 | Census | 1-year age groups  | De jure  | Excluded |
| Chile               | 2017 | Census | 5-year age groups  | De facto | Included |
| Colombia            | 1951 | Census | 5-year age groups  | De facto | Included |
| Colombia            | 1964 | Census | 1-year age groups  | De facto | Included |
| Colombia            | 1973 | Census | 1-year age groups  | De facto | Included |
| Colombia            | 1985 | Census | 1-year age groups  | De facto | Included |
| Colombia            | 1993 | Census | 1-year age groups  | De facto | Included |
| Colombia            | 2005 | Census | 1-year age groups  | De facto | Included |
| Colombia            | 2018 | Census | 5-year age groups  | De jure  | Included |
| Comoros             | 1958 | Census | 5-year age groups  | De facto | Excluded |
| Comoros             | 1966 | Census | non-std age groups | Unknown  | Included |
| Comoros             | 1980 | Census | 1-year age groups  | De facto | Included |
| Comoros             | 1991 | Census | 5-year age groups  | De jure  | Included |
| Comoros             | 2003 | Census | non-std age groups | De jure  | Included |
| Congo (Brazzaville) | 1974 | Census | 5-year age groups  | De jure  | Included |
| Congo (Brazzaville) | 1984 | Census | 1-year age groups  | De jure  | Included |
| Congo (Brazzaville) | 1985 | Census | 1-year age groups  | De jure  | Excluded |
| Congo (Brazzaville) | 2007 | Census | 1-year age groups  | De facto | Included |
| Cook Islands        | 1951 | Census | 5-year age groups  | De jure  | Excluded |
| Cook Islands        | 1956 | Census | 5-year age groups  | De facto | Included |
| Cook Islands        | 1961 | Census | 5-year age groups  | De facto | Included |
| Cook Islands        | 1966 | Census | 5-year age groups  | De facto | Excluded |
| Cook Islands        | 1971 | Census | 5-year age groups  | Unknown  | Included |
| Cook Islands        | 1976 | Census | 5-year age groups  | De facto | Excluded |
| Cook Islands        | 1981 | Census | 1-year age groups  | De facto | Included |
| Cook Islands        | 1986 | Census | 5-year age groups  | De facto | Included |
| Cook Islands        | 1991 | Census | 5-year age groups  | De facto | Included |
| Cook Islands        | 1996 | Census | 5-year age groups  | De facto | Included |
| Cook Islands        | 2001 | Census | 5-year age groups  | De facto | Included |
| Cook Islands        | 2006 | Census | 5-year age groups  | De facto | Included |
| Cook Islands        | 2011 | Census | 5-year age groups  | De facto | Included |
| Cook Islands        | 2016 | Census | 5-year age groups  | De facto | Included |
| Costa Rica          | 1950 | Census | 1-year age groups  | De jure  | Included |
| Costa Rica          | 1963 | Census | 1-year age groups  | De jure  | Included |
| Costa Rica          | 1973 | Census | 1-year age groups  | De jure  | Included |
| Costa Rica          | 1984 | Census | 1-year age groups  | De jure  | Included |
| Costa Rica          | 2000 | Census | 5-year age groups  | De jure  | Included |
| Costa Rica          | 2011 | Census | 1-year age groups  | De jure  | Included |
| Croatia             | 1971 | Census | 1-year age groups  | De facto | Included |
| Croatia             | 1991 | Census | 5-year age groups  | Unknown  | Excluded |
| Croatia             | 2001 | Census | 1-year age groups  | De jure  | Included |
| Croatia             | 2011 | Census | 1-year age groups  | De jure  | Included |
| Cuba                | 1953 | Census | 5-year age groups  | De jure  | Included |
| Cuba                | 1970 | Census | 5-year age groups  | De jure  | Included |
| Cuba                | 1981 | Census | 1-year age groups  | De jure  | Included |
| Cuba                | 2002 | Census | 1-year age groups  | De jure  | Included |
| Cuba                | 2012 | Census | 1-year age groups  | De jure  | Included |
| Cyprus              | 1960 | Census | 5-year age groups  | De jure  | Included |
| Cyprus              | 1973 | Census | 5-year age groups  | De jure  | Excluded |
| Czechia             | 1961 | Census | 1-year age groups  | De facto | Included |
| Czechia             | 1970 | Census | 1-year age groups  | De jure  | Included |
| Czechia             | 1980 | Census | 1-year age groups  | De jure  | Included |

|               |      |          |                   |          |          |
|---------------|------|----------|-------------------|----------|----------|
| Czechia       | 1991 | Census   | 5-year age groups | De jure  | Included |
| Czechia       | 2000 | Registry | 1-year age groups | NA       | Included |
| Czechia       | 2001 | Census   | 5-year age groups | De jure  | Excluded |
| Czechia       | 2002 | Registry | 1-year age groups | NA       | Included |
| Czechia       | 2003 | Registry | 1-year age groups | NA       | Included |
| Czechia       | 2004 | Registry | 1-year age groups | NA       | Included |
| Czechia       | 2005 | Registry | 1-year age groups | NA       | Included |
| Czechia       | 2006 | Registry | 1-year age groups | NA       | Included |
| Czechia       | 2007 | Registry | 1-year age groups | NA       | Included |
| Czechia       | 2008 | Registry | 1-year age groups | NA       | Included |
| Czechia       | 2009 | Registry | 1-year age groups | NA       | Included |
| Czechia       | 2010 | Registry | 1-year age groups | NA       | Included |
| Czechia       | 2011 | Census   | 1-year age groups | De jure  | Excluded |
| Czechia       | 2012 | Registry | 1-year age groups | NA       | Included |
| Czechia       | 2013 | Registry | 1-year age groups | NA       | Included |
| Czechia       | 2014 | Registry | 1-year age groups | NA       | Included |
| Czechia       | 2015 | Registry | 1-year age groups | NA       | Included |
| Czechia       | 2016 | Registry | 1-year age groups | NA       | Included |
| Czechia       | 2017 | Registry | 1-year age groups | NA       | Included |
| Côte d'Ivoire | 1975 | Census   | 5-year age groups | De facto | Included |
| Côte d'Ivoire | 1988 | Census   | 1-year age groups | De facto | Included |
| Côte d'Ivoire | 1998 | Census   | 5-year age groups | Unknown  | Included |
| Côte d'Ivoire | 2014 | Census   | 1-year age groups | De jure  | Included |
| DR Congo      | 1970 | Census   | all ages only     | De jure  | Included |
| DR Congo      | 1984 | Census   | 1-year age groups | Unknown  | Included |
| Denmark       | 1950 | Census   | 1-year age groups | De jure  | Included |
| Denmark       | 1960 | Census   | 1-year age groups | De jure  | Included |
| Denmark       | 1965 | Census   | 5-year age groups | De jure  | Included |
| Denmark       | 1970 | Census   | 1-year age groups | De jure  | Included |
| Denmark       | 1976 | Census   | 1-year age groups | De jure  | Included |
| Denmark       | 1980 | Registry | 1-year age groups | NA       | Included |
| Denmark       | 1981 | Registry | 1-year age groups | NA       | Included |
| Denmark       | 1982 | Registry | 1-year age groups | NA       | Included |
| Denmark       | 1983 | Registry | 1-year age groups | NA       | Included |
| Denmark       | 1984 | Registry | 1-year age groups | NA       | Included |
| Denmark       | 1985 | Registry | 1-year age groups | NA       | Included |
| Denmark       | 1986 | Registry | 1-year age groups | NA       | Included |
| Denmark       | 1987 | Registry | 1-year age groups | NA       | Included |
| Denmark       | 1988 | Registry | 1-year age groups | NA       | Included |
| Denmark       | 1989 | Registry | 1-year age groups | NA       | Included |
| Denmark       | 1990 | Registry | 1-year age groups | NA       | Included |
| Denmark       | 1991 | Census   | 1-year age groups | De jure  | Excluded |
| Denmark       | 1992 | Registry | 1-year age groups | NA       | Included |
| Denmark       | 1993 | Registry | 1-year age groups | NA       | Included |
| Denmark       | 1994 | Registry | 1-year age groups | NA       | Included |
| Denmark       | 1995 | Registry | 1-year age groups | NA       | Included |
| Denmark       | 1996 | Registry | 1-year age groups | NA       | Included |
| Denmark       | 1997 | Registry | 1-year age groups | NA       | Included |
| Denmark       | 1998 | Registry | 1-year age groups | NA       | Included |
| Denmark       | 1999 | Registry | 1-year age groups | NA       | Included |
| Denmark       | 2000 | Registry | 1-year age groups | NA       | Included |
| Denmark       | 2001 | Registry | 1-year age groups | NA       | Included |
| Denmark       | 2002 | Registry | 1-year age groups | NA       | Included |
| Denmark       | 2003 | Registry | 1-year age groups | NA       | Included |
| Denmark       | 2004 | Registry | 1-year age groups | NA       | Included |
| Denmark       | 2005 | Registry | 1-year age groups | NA       | Included |

|                    |      |          |                   |          |          |
|--------------------|------|----------|-------------------|----------|----------|
| Denmark            | 2006 | Registry | 1-year age groups | NA       | Included |
| Denmark            | 2007 | Registry | 1-year age groups | NA       | Included |
| Denmark            | 2008 | Registry | 1-year age groups | NA       | Included |
| Denmark            | 2009 | Registry | 1-year age groups | NA       | Included |
| Denmark            | 2010 | Registry | 1-year age groups | NA       | Included |
| Denmark            | 2011 | Registry | 1-year age groups | NA       | Included |
| Denmark            | 2012 | Registry | 1-year age groups | NA       | Included |
| Denmark            | 2013 | Registry | 1-year age groups | NA       | Included |
| Denmark            | 2014 | Registry | 1-year age groups | NA       | Included |
| Denmark            | 2015 | Registry | 1-year age groups | NA       | Included |
| Denmark            | 2016 | Registry | 1-year age groups | NA       | Included |
| Denmark            | 2017 | Registry | 1-year age groups | NA       | Included |
| Djibouti           | 1983 | Census   | 5-year age groups | De jure  | Included |
| Djibouti           | 2009 | Census   | 5-year age groups | De facto | Excluded |
| Djibouti           | 2009 | Census   | 5-year age groups | De jure  | Included |
| Dominica           | 1960 | Census   | 5-year age groups | De facto | Included |
| Dominica           | 1970 | Census   | 5-year age groups | De facto | Included |
| Dominica           | 1981 | Census   | 5-year age groups | De facto | Excluded |
| Dominica           | 1991 | Census   | 5-year age groups | De facto | Included |
| Dominica           | 2001 | Census   | 5-year age groups | De facto | Included |
| Dominica           | 2011 | Census   | 5-year age groups | De facto | Included |
| Dominican Republic | 1950 | Census   | 1-year age groups | De jure  | Included |
| Dominican Republic | 1960 | Census   | 1-year age groups | De jure  | Included |
| Dominican Republic | 1970 | Census   | 1-year age groups | De jure  | Included |
| Dominican Republic | 1981 | Census   | 5-year age groups | De jure  | Included |
| Dominican Republic | 1993 | Census   | 1-year age groups | De jure  | Included |
| Dominican Republic | 2002 | Census   | 1-year age groups | De jure  | Included |
| Dominican Republic | 2010 | Census   | 1-year age groups | De jure  | Included |
| Ecuador            | 1950 | Census   | 1-year age groups | De facto | Included |
| Ecuador            | 1962 | Census   | 1-year age groups | De facto | Included |
| Ecuador            | 1974 | Census   | 5-year age groups | De facto | Included |
| Ecuador            | 1982 | Census   | 1-year age groups | De facto | Included |
| Ecuador            | 1990 | Census   | 1-year age groups | De facto | Included |
| Ecuador            | 2001 | Census   | 1-year age groups | De facto | Included |
| Ecuador            | 2010 | Census   | 1-year age groups | De facto | Included |
| Egypt              | 1960 | Census   | 5-year age groups | De facto | Included |
| Egypt              | 1966 | Census   | all ages only     | De facto | Included |
| Egypt              | 1976 | Census   | 5-year age groups | De facto | Included |
| Egypt              | 1986 | Census   | 5-year age groups | De facto | Included |
| Egypt              | 1996 | Census   | 5-year age groups | De facto | Included |
| Egypt              | 2006 | Census   | 1-year age groups | De facto | Included |
| Egypt              | 2017 | Census   | 5-year age groups | De facto | Included |
| El Salvador        | 1950 | Census   | 1-year age groups | De facto | Included |
| El Salvador        | 1961 | Census   | 1-year age groups | De facto | Included |
| El Salvador        | 1971 | Census   | 1-year age groups | De facto | Included |
| El Salvador        | 1992 | Census   | 1-year age groups | De facto | Included |
| El Salvador        | 1993 | Census   | 5-year age groups | Unknown  | Excluded |
| El Salvador        | 2007 | Census   | 1-year age groups | De jure  | Included |
| Equatorial Guinea  | 1983 | Census   | 5-year age groups | De facto | Included |
| Equatorial Guinea  | 1994 | Census   | 1-year age groups | Unknown  | Excluded |
| Equatorial Guinea  | 2015 | Census   | all ages only     | Unknown  | Included |
| Eritrea            | 1984 | Census   | all ages only     | De jure  | Included |
| Estonia            | 1950 | Registry | 5-year age groups | NA       | Included |
| Estonia            | 1951 | Registry | 5-year age groups | NA       | Included |
| Estonia            | 1952 | Registry | 5-year age groups | NA       | Included |
| Estonia            | 1953 | Registry | 5-year age groups | NA       | Included |





|                                |      |          |                   |          |          |
|--------------------------------|------|----------|-------------------|----------|----------|
| Estonia                        | 2010 | Registry | 5-year age groups | NA       | Included |
| Estonia                        | 2011 | Registry | 5-year age groups | NA       | Included |
| Estonia                        | 2012 | Registry | 5-year age groups | NA       | Included |
| Estonia                        | 2013 | Registry | 5-year age groups | NA       | Included |
| Estonia                        | 2014 | Registry | 5-year age groups | NA       | Included |
| Estonia                        | 2015 | Registry | 5-year age groups | NA       | Included |
| Estonia                        | 2016 | Registry | 5-year age groups | NA       | Included |
| Estonia                        | 2017 | Registry | 5-year age groups | NA       | Included |
| Eswatini                       | 1956 | Census   | 5-year age groups | De facto | Excluded |
| Eswatini                       | 1966 | Census   | 1-year age groups | De facto | Included |
| Eswatini                       | 1976 | Census   | 5-year age groups | De facto | Included |
| Eswatini                       | 1986 | Census   | 1-year age groups | De facto | Included |
| Eswatini                       | 1997 | Census   | 1-year age groups | De facto | Included |
| Eswatini                       | 2007 | Census   | 5-year age groups | De facto | Excluded |
| Eswatini                       | 2017 | Census   | 1-year age groups | De jure  | Excluded |
| Ethiopia                       | 1984 | Census   | 1-year age groups | De facto | Included |
| Ethiopia                       | 1994 | Census   | 1-year age groups | De facto | Included |
| Ethiopia                       | 2007 | Census   | 1-year age groups | De facto | Included |
| Federated States of Micronesia | 1989 | Census   | all ages only     | De jure  | Excluded |
| Federated States of Micronesia | 1994 | Census   | 5-year age groups | De jure  | Included |
| Federated States of Micronesia | 2000 | Census   | 1-year age groups | De jure  | Included |
| Federated States of Micronesia | 2010 | Census   | 5-year age groups | De facto | Included |
| Fiji                           | 1956 | Census   | 5-year age groups | De facto | Included |
| Fiji                           | 1966 | Census   | 5-year age groups | De facto | Included |
| Fiji                           | 1976 | Census   | 5-year age groups | De facto | Included |
| Fiji                           | 1986 | Census   | 1-year age groups | De facto | Included |
| Fiji                           | 1996 | Census   | 1-year age groups | De facto | Included |
| Fiji                           | 2007 | Census   | 5-year age groups | De facto | Included |
| Fiji                           | 2017 | Census   | 5-year age groups | De jure  | Included |
| Finland                        | 1950 | Census   | 1-year age groups | De jure  | Included |
| Finland                        | 1960 | Census   | 5-year age groups | De jure  | Excluded |
| Finland                        | 1970 | Census   | 1-year age groups | De jure  | Excluded |
| Finland                        | 1971 | Registry | 1-year age groups | NA       | Included |
| Finland                        | 1972 | Registry | 1-year age groups | NA       | Included |
| Finland                        | 1973 | Registry | 1-year age groups | NA       | Included |
| Finland                        | 1974 | Registry | 1-year age groups | NA       | Included |
| Finland                        | 1975 | Census   | 5-year age groups | De jure  | Excluded |
| Finland                        | 1976 | Registry | 1-year age groups | NA       | Included |
| Finland                        | 1977 | Registry | 1-year age groups | NA       | Included |
| Finland                        | 1978 | Registry | 1-year age groups | NA       | Included |
| Finland                        | 1979 | Registry | 1-year age groups | NA       | Included |
| Finland                        | 1980 | Registry | 1-year age groups | NA       | Included |
| Finland                        | 1981 | Registry | 1-year age groups | NA       | Included |
| Finland                        | 1982 | Registry | 1-year age groups | NA       | Included |
| Finland                        | 1983 | Registry | 1-year age groups | NA       | Included |
| Finland                        | 1984 | Registry | 1-year age groups | NA       | Included |
| Finland                        | 1985 | Census   | 1-year age groups | De jure  | Excluded |
| Finland                        | 1986 | Registry | 1-year age groups | NA       | Included |
| Finland                        | 1987 | Registry | 1-year age groups | NA       | Included |
| Finland                        | 1988 | Registry | 1-year age groups | NA       | Included |
| Finland                        | 1989 | Registry | 1-year age groups | NA       | Included |
| Finland                        | 1990 | Census   | 1-year age groups | De jure  | Excluded |
| Finland                        | 1991 | Registry | 1-year age groups | NA       | Included |
| Finland                        | 1992 | Registry | 1-year age groups | NA       | Included |
| Finland                        | 1993 | Registry | 1-year age groups | NA       | Included |
| Finland                        | 1994 | Registry | 1-year age groups | NA       | Included |

|         |      |          |                    |          |          |
|---------|------|----------|--------------------|----------|----------|
| Finland | 1995 | Registry | 1-year age groups  | NA       | Included |
| Finland | 1996 | Registry | 1-year age groups  | NA       | Included |
| Finland | 1997 | Registry | 1-year age groups  | NA       | Included |
| Finland | 1998 | Registry | 1-year age groups  | NA       | Included |
| Finland | 1999 | Registry | 1-year age groups  | NA       | Included |
| Finland | 2000 | Census   | 1-year age groups  | De jure  | Excluded |
| Finland | 2001 | Registry | 1-year age groups  | NA       | Included |
| Finland | 2002 | Registry | 1-year age groups  | NA       | Included |
| Finland | 2003 | Registry | 1-year age groups  | NA       | Included |
| Finland | 2004 | Registry | 1-year age groups  | NA       | Included |
| Finland | 2005 | Registry | 1-year age groups  | NA       | Included |
| Finland | 2006 | Registry | 1-year age groups  | NA       | Included |
| Finland | 2007 | Registry | 1-year age groups  | NA       | Included |
| Finland | 2008 | Registry | 1-year age groups  | NA       | Included |
| Finland | 2009 | Registry | 1-year age groups  | NA       | Included |
| Finland | 2010 | Census   | 1-year age groups  | De jure  | Excluded |
| Finland | 2011 | Registry | 1-year age groups  | NA       | Included |
| Finland | 2012 | Registry | 1-year age groups  | NA       | Included |
| Finland | 2013 | Registry | 1-year age groups  | NA       | Included |
| Finland | 2014 | Registry | 1-year age groups  | NA       | Included |
| Finland | 2015 | Registry | 1-year age groups  | NA       | Included |
| Finland | 2016 | Registry | 1-year age groups  | NA       | Included |
| Finland | 2017 | Registry | 1-year age groups  | NA       | Included |
| France  | 1954 | Census   | 5-year age groups  | De jure  | Included |
| France  | 1962 | Census   | 5-year age groups  | De jure  | Included |
| France  | 1968 | Census   | 5-year age groups  | De jure  | Included |
| France  | 1975 | Census   | 5-year age groups  | De jure  | Included |
| France  | 1982 | Census   | 5-year age groups  | De jure  | Included |
| France  | 1990 | Census   | 5-year age groups  | De jure  | Included |
| France  | 1999 | Census   | 5-year age groups  | De jure  | Included |
| France  | 2006 | Census   | 1-year age groups  | De jure  | Included |
| France  | 2007 | Census   | 1-year age groups  | De jure  | Included |
| France  | 2008 | Census   | 1-year age groups  | De jure  | Included |
| France  | 2009 | Census   | 1-year age groups  | De jure  | Included |
| France  | 2010 | Census   | 1-year age groups  | De jure  | Included |
| France  | 2011 | Census   | 1-year age groups  | De jure  | Included |
| France  | 2012 | Census   | 1-year age groups  | De jure  | Included |
| France  | 2013 | Census   | 1-year age groups  | De jure  | Included |
| France  | 2014 | Census   | 1-year age groups  | De jure  | Included |
| France  | 2015 | Census   | 5-year age groups  | Unknown  | Included |
| Gabon   | 1960 | Census   | 5-year age groups  | De facto | Included |
| Gabon   | 1980 | Census   | 5-year age groups  | De jure  | Excluded |
| Gabon   | 1993 | Census   | 1-year age groups  | De facto | Included |
| Gabon   | 2013 | Census   | non-std age groups | De jure  | Included |
| Georgia | 1959 | Census   | 5-year age groups  | De facto | Included |
| Georgia | 1970 | Census   | 5-year age groups  | De facto | Included |
| Georgia | 1979 | Census   | 5-year age groups  | De facto | Included |
| Georgia | 1989 | Census   | 5-year age groups  | De jure  | Included |
| Georgia | 2002 | Census   | 1-year age groups  | De jure  | Included |
| Georgia | 2014 | Census   | 1-year age groups  | De jure  | Included |
| Germany | 1990 | Registry | 1-year age groups  | NA       | Included |
| Germany | 1991 | Registry | 1-year age groups  | NA       | Included |
| Germany | 1992 | Registry | 1-year age groups  | NA       | Included |
| Germany | 1993 | Registry | 1-year age groups  | NA       | Included |
| Germany | 1994 | Registry | 1-year age groups  | NA       | Included |
| Germany | 1995 | Registry | 1-year age groups  | NA       | Included |

|           |      |          |                    |          |          |
|-----------|------|----------|--------------------|----------|----------|
| Germany   | 1996 | Registry | 1-year age groups  | NA       | Included |
| Germany   | 1997 | Registry | 1-year age groups  | NA       | Included |
| Germany   | 1998 | Registry | 1-year age groups  | NA       | Included |
| Germany   | 1999 | Registry | 1-year age groups  | NA       | Included |
| Germany   | 2000 | Registry | 1-year age groups  | NA       | Included |
| Germany   | 2001 | Registry | 1-year age groups  | NA       | Included |
| Germany   | 2002 | Registry | 1-year age groups  | NA       | Included |
| Germany   | 2003 | Registry | 1-year age groups  | NA       | Included |
| Germany   | 2004 | Registry | 1-year age groups  | NA       | Included |
| Germany   | 2005 | Registry | 1-year age groups  | NA       | Included |
| Germany   | 2006 | Registry | 1-year age groups  | NA       | Included |
| Germany   | 2007 | Registry | 1-year age groups  | NA       | Included |
| Germany   | 2008 | Registry | 1-year age groups  | NA       | Included |
| Germany   | 2009 | Registry | 1-year age groups  | NA       | Included |
| Germany   | 2010 | Registry | 1-year age groups  | NA       | Included |
| Germany   | 2011 | Census   | 1-year age groups  | De jure  | Excluded |
| Germany   | 2012 | Registry | 1-year age groups  | NA       | Included |
| Germany   | 2013 | Registry | 1-year age groups  | NA       | Included |
| Germany   | 2014 | Registry | 1-year age groups  | NA       | Included |
| Germany   | 2015 | Registry | 1-year age groups  | NA       | Included |
| Germany   | 2016 | Registry | 1-year age groups  | NA       | Included |
| Ghana     | 1960 | Census   | 5-year age groups  | De facto | Excluded |
| Ghana     | 1970 | Census   | 1-year age groups  | De facto | Included |
| Ghana     | 1984 | Census   | 1-year age groups  | De facto | Included |
| Ghana     | 2000 | Census   | 5-year age groups  | De facto | Included |
| Ghana     | 2010 | Census   | 1-year age groups  | De facto | Included |
| Greece    | 1951 | Census   | 5-year age groups  | De facto | Included |
| Greece    | 1961 | Census   | 5-year age groups  | De facto | Included |
| Greece    | 1971 | Census   | 5-year age groups  | De facto | Included |
| Greece    | 1981 | Census   | 1-year age groups  | De facto | Included |
| Greece    | 1991 | Census   | 1-year age groups  | De facto | Included |
| Greece    | 2001 | Census   | 1-year age groups  | De jure  | Included |
| Greece    | 2011 | Census   | 1-year age groups  | De facto | Included |
| Greenland | 1951 | Census   | 5-year age groups  | De jure  | Included |
| Greenland | 1955 | Census   | 5-year age groups  | De jure  | Included |
| Greenland | 1960 | Census   | non-std age groups | De jure  | Included |
| Greenland | 1965 | Census   | 1-year age groups  | De jure  | Included |
| Greenland | 1970 | Census   | 1-year age groups  | De jure  | Included |
| Greenland | 1976 | Census   | 5-year age groups  | De jure  | Included |
| Greenland | 1977 | Registry | 1-year age groups  | NA       | Included |
| Greenland | 1978 | Registry | 1-year age groups  | NA       | Included |
| Greenland | 1979 | Registry | 1-year age groups  | NA       | Included |
| Greenland | 1980 | Registry | 1-year age groups  | NA       | Included |
| Greenland | 1981 | Registry | 1-year age groups  | NA       | Included |
| Greenland | 1982 | Registry | 1-year age groups  | NA       | Included |
| Greenland | 1983 | Registry | 1-year age groups  | NA       | Included |
| Greenland | 1984 | Registry | 1-year age groups  | NA       | Included |
| Greenland | 1985 | Registry | 1-year age groups  | NA       | Included |
| Greenland | 1986 | Registry | 1-year age groups  | NA       | Included |
| Greenland | 1987 | Registry | 1-year age groups  | NA       | Included |
| Greenland | 1988 | Registry | 1-year age groups  | NA       | Included |
| Greenland | 1989 | Registry | 1-year age groups  | NA       | Included |
| Greenland | 1990 | Registry | 1-year age groups  | NA       | Included |
| Greenland | 1991 | Registry | 1-year age groups  | NA       | Included |
| Greenland | 1992 | Registry | 1-year age groups  | NA       | Included |
| Greenland | 1993 | Registry | 1-year age groups  | NA       | Included |

|               |      |          |                    |          |          |
|---------------|------|----------|--------------------|----------|----------|
| Greenland     | 1994 | Registry | 1-year age groups  | NA       | Included |
| Greenland     | 1995 | Registry | 1-year age groups  | NA       | Included |
| Greenland     | 1996 | Registry | 1-year age groups  | NA       | Included |
| Greenland     | 1997 | Registry | 1-year age groups  | NA       | Included |
| Greenland     | 1998 | Registry | 1-year age groups  | NA       | Included |
| Greenland     | 1999 | Registry | 1-year age groups  | NA       | Included |
| Greenland     | 2000 | Census   | 5-year age groups  | De jure  | Excluded |
| Greenland     | 2001 | Registry | 1-year age groups  | NA       | Included |
| Greenland     | 2002 | Registry | 1-year age groups  | NA       | Included |
| Greenland     | 2003 | Registry | 1-year age groups  | NA       | Included |
| Greenland     | 2004 | Registry | 1-year age groups  | NA       | Included |
| Greenland     | 2005 | Registry | 1-year age groups  | NA       | Included |
| Greenland     | 2006 | Registry | 1-year age groups  | NA       | Included |
| Greenland     | 2007 | Registry | 1-year age groups  | NA       | Included |
| Greenland     | 2008 | Registry | 1-year age groups  | NA       | Included |
| Greenland     | 2009 | Registry | 1-year age groups  | NA       | Included |
| Greenland     | 2010 | Registry | 1-year age groups  | NA       | Included |
| Greenland     | 2011 | Registry | 1-year age groups  | NA       | Included |
| Greenland     | 2012 | Registry | 1-year age groups  | NA       | Included |
| Greenland     | 2013 | Registry | 1-year age groups  | NA       | Included |
| Greenland     | 2014 | Registry | 1-year age groups  | NA       | Included |
| Greenland     | 2015 | Registry | 1-year age groups  | NA       | Included |
| Greenland     | 2016 | Registry | 1-year age groups  | NA       | Included |
| Greenland     | 2017 | Registry | 1-year age groups  | NA       | Included |
| Grenada       | 1960 | Census   | 5-year age groups  | De facto | Included |
| Grenada       | 1970 | Census   | 5-year age groups  | De facto | Included |
| Grenada       | 1981 | Census   | 5-year age groups  | De facto | Excluded |
| Grenada       | 1991 | Census   | 5-year age groups  | De facto | Included |
| Grenada       | 2001 | Census   | 5-year age groups  | De facto | Included |
| Grenada       | 2011 | Census   | 5-year age groups  | De jure  | Included |
| Guam          | 1950 | Census   | 5-year age groups  | De jure  | Included |
| Guam          | 1952 | Census   | all ages only      | Unknown  | Excluded |
| Guam          | 1953 | Census   | all ages only      | Unknown  | Excluded |
| Guam          | 1954 | Census   | all ages only      | Unknown  | Excluded |
| Guam          | 1955 | Census   | all ages only      | Unknown  | Excluded |
| Guam          | 1958 | Census   | all ages only      | Unknown  | Excluded |
| Guam          | 1960 | Census   | non-std age groups | De jure  | Included |
| Guam          | 1970 | Census   | 5-year age groups  | De jure  | Included |
| Guam          | 1980 | Census   | 1-year age groups  | De jure  | Included |
| Guam          | 1990 | Census   | 1-year age groups  | De jure  | Included |
| Guam          | 2000 | Census   | 1-year age groups  | De jure  | Included |
| Guam          | 2010 | Census   | 5-year age groups  | De jure  | Included |
| Guam          | 2020 | Census   | 5-year age groups  | De jure  | Included |
| Guatemala     | 1950 | Census   | 1-year age groups  | De jure  | Included |
| Guatemala     | 1964 | Census   | 1-year age groups  | De jure  | Included |
| Guatemala     | 1973 | Census   | 1-year age groups  | De jure  | Included |
| Guatemala     | 1981 | Census   | 1-year age groups  | De jure  | Included |
| Guatemala     | 1994 | Census   | 1-year age groups  | De jure  | Included |
| Guatemala     | 2002 | Census   | all ages only      | De jure  | Included |
| Guatemala     | 2018 | Census   | 5-year age groups  | De jure  | Included |
| Guinea        | 1966 | Census   | all ages only      | Unknown  | Included |
| Guinea        | 1983 | Census   | 1-year age groups  | Unknown  | Included |
| Guinea        | 1996 | Census   | 5-year age groups  | De facto | Included |
| Guinea        | 2014 | Census   | 1-year age groups  | De jure  | Included |
| Guinea-Bissau | 1950 | Census   | 5-year age groups  | De facto | Included |
| Guinea-Bissau | 1960 | Census   | 5-year age groups  | De facto | Included |

|               |      |          |                    |          |          |
|---------------|------|----------|--------------------|----------|----------|
| Guinea-Bissau | 1979 | Census   | 5-year age groups  | De jure  | Included |
| Guinea-Bissau | 1991 | Census   | non-std age groups | De facto | Included |
| Guinea-Bissau | 2009 | Census   | 1-year age groups  | De jure  | Included |
| Guyana        | 1960 | Census   | 5-year age groups  | De facto | Included |
| Guyana        | 1970 | Census   | 1-year age groups  | De facto | Included |
| Guyana        | 1980 | Census   | 5-year age groups  | Unknown  | Excluded |
| Guyana        | 1991 | Census   | 5-year age groups  | De facto | Included |
| Guyana        | 2002 | Census   | 5-year age groups  | De facto | Included |
| Guyana        | 2012 | Census   | 5-year age groups  | De jure  | Included |
| Haiti         | 1950 | Census   | 1-year age groups  | De jure  | Included |
| Haiti         | 1971 | Census   | 1-year age groups  | De jure  | Included |
| Haiti         | 1982 | Census   | 1-year age groups  | De jure  | Included |
| Haiti         | 2003 | Census   | 1-year age groups  | Unknown  | Included |
| Honduras      | 1950 | Census   | 5-year age groups  | De facto | Included |
| Honduras      | 1961 | Census   | 5-year age groups  | De facto | Included |
| Honduras      | 1974 | Census   | 5-year age groups  | De facto | Included |
| Honduras      | 1988 | Census   | 1-year age groups  | De facto | Included |
| Honduras      | 2001 | Census   | 1-year age groups  | De jure  | Included |
| Honduras      | 2013 | Census   | 1-year age groups  | De jure  | Included |
| Hungary       | 1960 | Census   | 1-year age groups  | De facto | Included |
| Hungary       | 1970 | Census   | 1-year age groups  | De facto | Included |
| Hungary       | 1980 | Census   | 1-year age groups  | De facto | Included |
| Hungary       | 1990 | Census   | 1-year age groups  | De facto | Included |
| Hungary       | 2001 | Census   | 1-year age groups  | Unknown  | Included |
| Hungary       | 2011 | Census   | 1-year age groups  | De facto | Included |
| Iceland       | 1950 | Census   | 5-year age groups  | De jure  | Excluded |
| Iceland       | 1951 | Registry | 1-year age groups  | NA       | Included |
| Iceland       | 1952 | Registry | 1-year age groups  | NA       | Included |
| Iceland       | 1953 | Registry | 1-year age groups  | NA       | Included |
| Iceland       | 1954 | Registry | 1-year age groups  | NA       | Included |
| Iceland       | 1955 | Registry | 1-year age groups  | NA       | Included |
| Iceland       | 1956 | Registry | 1-year age groups  | NA       | Included |
| Iceland       | 1957 | Registry | 1-year age groups  | NA       | Included |
| Iceland       | 1958 | Registry | 1-year age groups  | NA       | Included |
| Iceland       | 1959 | Registry | 1-year age groups  | NA       | Included |
| Iceland       | 1960 | Census   | 1-year age groups  | De jure  | Excluded |
| Iceland       | 1961 | Registry | 1-year age groups  | NA       | Included |
| Iceland       | 1962 | Registry | 1-year age groups  | NA       | Included |
| Iceland       | 1963 | Registry | 1-year age groups  | NA       | Included |
| Iceland       | 1964 | Registry | 1-year age groups  | NA       | Included |
| Iceland       | 1965 | Registry | 1-year age groups  | NA       | Included |
| Iceland       | 1966 | Registry | 1-year age groups  | NA       | Included |
| Iceland       | 1967 | Registry | 1-year age groups  | NA       | Included |
| Iceland       | 1968 | Registry | 1-year age groups  | NA       | Included |
| Iceland       | 1969 | Registry | 1-year age groups  | NA       | Included |
| Iceland       | 1970 | Census   | 5-year age groups  | De jure  | Excluded |
| Iceland       | 1971 | Registry | 1-year age groups  | NA       | Included |
| Iceland       | 1972 | Registry | 1-year age groups  | NA       | Included |
| Iceland       | 1973 | Registry | 1-year age groups  | NA       | Included |
| Iceland       | 1974 | Registry | 1-year age groups  | NA       | Included |
| Iceland       | 1975 | Registry | 1-year age groups  | NA       | Included |
| Iceland       | 1976 | Registry | 1-year age groups  | NA       | Included |
| Iceland       | 1977 | Registry | 1-year age groups  | NA       | Included |
| Iceland       | 1978 | Registry | 1-year age groups  | NA       | Included |
| Iceland       | 1979 | Registry | 1-year age groups  | NA       | Included |
| Iceland       | 1980 | Registry | 1-year age groups  | NA       | Included |

|           |      |          |                    |          |          |
|-----------|------|----------|--------------------|----------|----------|
| Iceland   | 1981 | Registry | 1-year age groups  | NA       | Included |
| Iceland   | 1982 | Registry | 1-year age groups  | NA       | Included |
| Iceland   | 1983 | Registry | 1-year age groups  | NA       | Included |
| Iceland   | 1984 | Registry | 1-year age groups  | NA       | Included |
| Iceland   | 1985 | Registry | 1-year age groups  | NA       | Included |
| Iceland   | 1986 | Registry | 1-year age groups  | NA       | Included |
| Iceland   | 1987 | Registry | 1-year age groups  | NA       | Included |
| Iceland   | 1988 | Registry | 1-year age groups  | NA       | Included |
| Iceland   | 1989 | Registry | 1-year age groups  | NA       | Included |
| Iceland   | 1990 | Registry | 1-year age groups  | NA       | Included |
| Iceland   | 1991 | Registry | 1-year age groups  | NA       | Included |
| Iceland   | 1992 | Registry | 1-year age groups  | NA       | Included |
| Iceland   | 1993 | Registry | 1-year age groups  | NA       | Included |
| Iceland   | 1994 | Registry | 1-year age groups  | NA       | Included |
| Iceland   | 1995 | Registry | 1-year age groups  | NA       | Included |
| Iceland   | 1996 | Registry | 1-year age groups  | NA       | Included |
| Iceland   | 1997 | Registry | 1-year age groups  | NA       | Included |
| Iceland   | 1998 | Registry | 1-year age groups  | NA       | Included |
| Iceland   | 1999 | Registry | 1-year age groups  | NA       | Included |
| Iceland   | 2000 | Registry | 1-year age groups  | NA       | Included |
| Iceland   | 2001 | Registry | 1-year age groups  | NA       | Included |
| Iceland   | 2002 | Registry | 1-year age groups  | NA       | Included |
| Iceland   | 2003 | Registry | 1-year age groups  | NA       | Included |
| Iceland   | 2004 | Registry | 1-year age groups  | NA       | Included |
| Iceland   | 2005 | Registry | 1-year age groups  | NA       | Included |
| Iceland   | 2006 | Registry | 1-year age groups  | NA       | Included |
| Iceland   | 2007 | Registry | 1-year age groups  | NA       | Included |
| Iceland   | 2008 | Registry | 1-year age groups  | NA       | Included |
| Iceland   | 2009 | Registry | 1-year age groups  | NA       | Included |
| Iceland   | 2010 | Registry | 1-year age groups  | NA       | Included |
| Iceland   | 2011 | Census   | 5-year age groups  | De jure  | Excluded |
| Iceland   | 2012 | Registry | 1-year age groups  | NA       | Included |
| Iceland   | 2013 | Registry | 1-year age groups  | NA       | Included |
| Iceland   | 2014 | Registry | 1-year age groups  | NA       | Included |
| Iceland   | 2015 | Registry | 1-year age groups  | NA       | Included |
| Iceland   | 2016 | Registry | 1-year age groups  | NA       | Included |
| Iceland   | 2017 | Registry | 1-year age groups  | NA       | Included |
| India     | 1951 | Census   | 1-year age groups  | De facto | Included |
| India     | 1961 | Census   | 5-year age groups  | De facto | Included |
| India     | 1971 | Census   | 1-year age groups  | De facto | Included |
| India     | 1981 | Census   | 5-year age groups  | De facto | Included |
| India     | 1991 | Census   | 1-year age groups  | De facto | Included |
| India     | 2001 | Census   | 1-year age groups  | De facto | Included |
| India     | 2011 | Census   | 1-year age groups  | De facto | Included |
| Indonesia | 1961 | Census   | non-std age groups | De facto | Included |
| Indonesia | 1971 | Census   | 5-year age groups  | De jure  | Excluded |
| Indonesia | 1980 | Census   | 1-year age groups  | De facto | Included |
| Indonesia | 1990 | Census   | 5-year age groups  | De facto | Included |
| Indonesia | 2000 | Census   | 1-year age groups  | De jure  | Excluded |
| Indonesia | 2010 | Census   | 1-year age groups  | De jure  | Included |
| Indonesia | 2020 | Census   | 5-year age groups  | De jure  | Included |
| Iran      | 1956 | Census   | 5-year age groups  | De facto | Included |
| Iran      | 1966 | Census   | 5-year age groups  | De jure  | Excluded |
| Iran      | 1976 | Census   | 5-year age groups  | De facto | Included |
| Iran      | 1986 | Census   | 5-year age groups  | De facto | Included |
| Iran      | 1991 | Census   | 5-year age groups  | De jure  | Excluded |

|         |      |          |                   |          |          |
|---------|------|----------|-------------------|----------|----------|
| Iran    | 1994 | Census   | 1-year age groups | De jure  | Excluded |
| Iran    | 1996 | Census   | 5-year age groups | De jure  | Excluded |
| Iran    | 2006 | Census   | 1-year age groups | De jure  | Included |
| Iran    | 2011 | Census   | 1-year age groups | De jure  | Included |
| Iran    | 2016 | Census   | 5-year age groups | De jure  | Excluded |
| Iraq    | 1957 | Census   | 5-year age groups | De facto | Included |
| Iraq    | 1965 | Census   | 1-year age groups | De facto | Included |
| Iraq    | 1977 | Census   | 5-year age groups | De facto | Included |
| Iraq    | 1987 | Census   | 5-year age groups | De facto | Included |
| Iraq    | 1997 | Census   | 5-year age groups | De facto | Excluded |
| Ireland | 1951 | Census   | 1-year age groups | De facto | Included |
| Ireland | 1956 | Census   | 5-year age groups | De jure  | Included |
| Ireland | 1961 | Census   | 5-year age groups | De facto | Included |
| Ireland | 1966 | Census   | 5-year age groups | De facto | Included |
| Ireland | 1971 | Census   | 1-year age groups | De facto | Included |
| Ireland | 1979 | Census   | 5-year age groups | De facto | Included |
| Ireland | 1981 | Census   | 5-year age groups | De facto | Included |
| Ireland | 1986 | Census   | 5-year age groups | De facto | Included |
| Ireland | 1991 | Census   | 1-year age groups | De facto | Included |
| Ireland | 1996 | Census   | 1-year age groups | De facto | Included |
| Ireland | 2002 | Census   | 1-year age groups | De facto | Included |
| Ireland | 2006 | Census   | 1-year age groups | De facto | Included |
| Ireland | 2011 | Census   | 1-year age groups | De facto | Included |
| Ireland | 2016 | Census   | 1-year age groups | De jure  | Included |
| Israel  | 1961 | Census   | 1-year age groups | De jure  | Included |
| Israel  | 1972 | Census   | 5-year age groups | De jure  | Included |
| Israel  | 1983 | Census   | 5-year age groups | De jure  | Included |
| Israel  | 1995 | Census   | 1-year age groups | De facto | Included |
| Israel  | 2008 | Census   | 1-year age groups | De facto | Included |
| Italy   | 1951 | Census   | 5-year age groups | De jure  | Included |
| Italy   | 1961 | Census   | 1-year age groups | De jure  | Included |
| Italy   | 1971 | Census   | 1-year age groups | De jure  | Included |
| Italy   | 1981 | Census   | 1-year age groups | De facto | Included |
| Italy   | 1991 | Census   | 1-year age groups | De facto | Included |
| Italy   | 2001 | Census   | 1-year age groups | De jure  | Included |
| Italy   | 2002 | Registry | 1-year age groups | NA       | Included |
| Italy   | 2003 | Registry | 1-year age groups | NA       | Included |
| Italy   | 2004 | Registry | 1-year age groups | NA       | Included |
| Italy   | 2005 | Registry | 1-year age groups | NA       | Included |
| Italy   | 2006 | Registry | 1-year age groups | NA       | Included |
| Italy   | 2007 | Registry | 1-year age groups | NA       | Included |
| Italy   | 2008 | Registry | 1-year age groups | NA       | Included |
| Italy   | 2009 | Registry | 1-year age groups | NA       | Included |
| Italy   | 2010 | Registry | 1-year age groups | NA       | Included |
| Italy   | 2011 | Census   | 5-year age groups | De jure  | Excluded |
| Italy   | 2012 | Registry | 1-year age groups | NA       | Excluded |
| Italy   | 2013 | Registry | 1-year age groups | NA       | Excluded |
| Italy   | 2014 | Registry | 1-year age groups | NA       | Included |
| Italy   | 2015 | Registry | 1-year age groups | NA       | Included |
| Italy   | 2016 | Registry | 1-year age groups | NA       | Included |
| Italy   | 2017 | Registry | 1-year age groups | NA       | Included |
| Jamaica | 1953 | Census   | 5-year age groups | De jure  | Included |
| Jamaica | 1960 | Census   | 5-year age groups | De jure  | Included |
| Jamaica | 1970 | Census   | 5-year age groups | De jure  | Included |
| Jamaica | 1982 | Census   | 1-year age groups | De jure  | Included |
| Jamaica | 1991 | Census   | 1-year age groups | De jure  | Included |

|            |      |          |                    |          |          |
|------------|------|----------|--------------------|----------|----------|
| Jamaica    | 2001 | Census   | 1-year age groups  | De jure  | Included |
| Jamaica    | 2011 | Census   | 1-year age groups  | De jure  | Included |
| Japan      | 1950 | Census   | 1-year age groups  | De facto | Included |
| Japan      | 1955 | Census   | 5-year age groups  | De facto | Included |
| Japan      | 1960 | Census   | 5-year age groups  | De facto | Included |
| Japan      | 1965 | Census   | 1-year age groups  | De facto | Included |
| Japan      | 1970 | Census   | 1-year age groups  | De facto | Included |
| Japan      | 1975 | Census   | 5-year age groups  | De facto | Included |
| Japan      | 1980 | Census   | 1-year age groups  | De facto | Included |
| Japan      | 1985 | Census   | 5-year age groups  | De facto | Included |
| Japan      | 1990 | Census   | 1-year age groups  | De facto | Included |
| Japan      | 1995 | Census   | 1-year age groups  | De facto | Included |
| Japan      | 2000 | Census   | 1-year age groups  | De jure  | Included |
| Japan      | 2005 | Census   | 1-year age groups  | De jure  | Included |
| Japan      | 2010 | Census   | 1-year age groups  | De jure  | Included |
| Japan      | 2015 | Census   | 5-year age groups  | De jure  | Excluded |
| Japan      | 2020 | Census   | 1-year age groups  | De jure  | Included |
| Jordan     | 1961 | Census   | non-std age groups | De facto | Excluded |
| Jordan     | 1979 | Census   | 5-year age groups  | De facto | Included |
| Jordan     | 1994 | Census   | 5-year age groups  | De facto | Included |
| Jordan     | 2004 | Census   | 5-year age groups  | De facto | Included |
| Jordan     | 2015 | Census   | 1-year age groups  | De facto | Included |
| Kazakhstan | 1959 | Census   | non-std age groups | De facto | Included |
| Kazakhstan | 1970 | Census   | non-std age groups | De facto | Included |
| Kazakhstan | 1979 | Census   | 5-year age groups  | De facto | Included |
| Kazakhstan | 1989 | Census   | 1-year age groups  | De facto | Included |
| Kazakhstan | 1999 | Census   | 1-year age groups  | De jure  | Included |
| Kazakhstan | 2009 | Census   | 5-year age groups  | De facto | Included |
| Kazakhstan | 2010 | Registry | all ages only      | NA       | Included |
| Kazakhstan | 2011 | Registry | all ages only      | NA       | Included |
| Kazakhstan | 2012 | Registry | all ages only      | NA       | Included |
| Kazakhstan | 2013 | Registry | all ages only      | NA       | Included |
| Kazakhstan | 2014 | Registry | all ages only      | NA       | Included |
| Kazakhstan | 2015 | Registry | all ages only      | NA       | Included |
| Kazakhstan | 2016 | Registry | all ages only      | NA       | Included |
| Kenya      | 1962 | Census   | 5-year age groups  | Unknown  | Excluded |
| Kenya      | 1969 | Census   | 1-year age groups  | De facto | Included |
| Kenya      | 1979 | Census   | 5-year age groups  | De facto | Included |
| Kenya      | 1989 | Census   | 1-year age groups  | De jure  | Included |
| Kenya      | 1999 | Census   | 5-year age groups  | De facto | Included |
| Kenya      | 2009 | Census   | 1-year age groups  | De facto | Included |
| Kenya      | 2019 | Census   | 5-year age groups  | De facto | Included |
| Kiribati   | 1963 | Census   | 5-year age groups  | De facto | Included |
| Kiribati   | 1968 | Census   | 5-year age groups  | De facto | Included |
| Kiribati   | 1973 | Census   | 5-year age groups  | De facto | Included |
| Kiribati   | 1978 | Census   | 5-year age groups  | De facto | Included |
| Kiribati   | 1985 | Census   | 5-year age groups  | De facto | Included |
| Kiribati   | 1990 | Census   | 5-year age groups  | De facto | Included |
| Kiribati   | 1995 | Census   | 5-year age groups  | De facto | Included |
| Kiribati   | 2000 | Census   | 5-year age groups  | De facto | Included |
| Kiribati   | 2005 | Census   | 5-year age groups  | De facto | Included |
| Kiribati   | 2010 | Census   | 1-year age groups  | De facto | Included |
| Kiribati   | 2015 | Census   | 5-year age groups  | De jure  | Included |
| Kuwait     | 1957 | Census   | 5-year age groups  | De facto | Included |
| Kuwait     | 1961 | Census   | non-std age groups | De facto | Included |
| Kuwait     | 1965 | Census   | 1-year age groups  | De facto | Included |



|            |      |          |                    |          |          |
|------------|------|----------|--------------------|----------|----------|
| Kuwait     | 1970 | Census   | 1-year age groups  | De facto | Included |
| Kuwait     | 1975 | Census   | 5-year age groups  | De facto | Included |
| Kuwait     | 1980 | Census   | 5-year age groups  | De facto | Included |
| Kuwait     | 1985 | Census   | 1-year age groups  | De facto | Included |
| Kuwait     | 1995 | Census   | 5-year age groups  | De facto | Included |
| Kuwait     | 2005 | Census   | 5-year age groups  | De facto | Included |
| Kuwait     | 2011 | Census   | 1-year age groups  | De facto | Included |
| Kyrgyzstan | 1959 | Census   | non-std age groups | De facto | Included |
| Kyrgyzstan | 1970 | Census   | non-std age groups | De facto | Included |
| Kyrgyzstan | 1979 | Census   | 5-year age groups  | De facto | Included |
| Kyrgyzstan | 1989 | Census   | 1-year age groups  | De jure  | Included |
| Kyrgyzstan | 1999 | Census   | 1-year age groups  | De jure  | Included |
| Kyrgyzstan | 2009 | Census   | 1-year age groups  | De jure  | Included |
| Laos       | 1985 | Census   | 5-year age groups  | De jure  | Included |
| Laos       | 1995 | Census   | 5-year age groups  | De facto | Included |
| Laos       | 2005 | Census   | 1-year age groups  | De jure  | Included |
| Laos       | 2015 | Census   | 1-year age groups  | De jure  | Included |
| Latvia     | 1959 | Census   | non-std age groups | De facto | Included |
| Latvia     | 1970 | Census   | non-std age groups | De facto | Included |
| Latvia     | 1979 | Census   | 5-year age groups  | De jure  | Included |
| Latvia     | 1989 | Census   | 5-year age groups  | De jure  | Included |
| Latvia     | 2000 | Census   | 5-year age groups  | De jure  | Included |
| Latvia     | 2006 | Registry | 1-year age groups  | NA       | Included |
| Latvia     | 2007 | Registry | 1-year age groups  | NA       | Included |
| Latvia     | 2008 | Registry | 1-year age groups  | NA       | Included |
| Latvia     | 2009 | Registry | 1-year age groups  | NA       | Included |
| Latvia     | 2010 | Registry | 1-year age groups  | NA       | Included |
| Latvia     | 2011 | Census   | 1-year age groups  | De jure  | Excluded |
| Latvia     | 2012 | Registry | 1-year age groups  | NA       | Included |
| Latvia     | 2013 | Registry | 1-year age groups  | NA       | Included |
| Latvia     | 2014 | Registry | 1-year age groups  | NA       | Included |
| Latvia     | 2015 | Registry | 1-year age groups  | NA       | Included |
| Latvia     | 2016 | Registry | 1-year age groups  | NA       | Included |
| Latvia     | 2017 | Registry | 1-year age groups  | NA       | Included |
| Lebanon    | 1970 | Survey   | 5-year age groups  | De facto | Included |
| Lebanon    | 2007 | Census   | 5-year age groups  | De facto | Included |
| Lesotho    | 1956 | Census   | non-std age groups | De facto | Included |
| Lesotho    | 1966 | Census   | 1-year age groups  | De facto | Included |
| Lesotho    | 1976 | Census   | 5-year age groups  | De facto | Included |
| Lesotho    | 1986 | Census   | 5-year age groups  | De facto | Included |
| Lesotho    | 1996 | Census   | 5-year age groups  | De facto | Included |
| Lesotho    | 2006 | Census   | 5-year age groups  | De facto | Included |
| Lesotho    | 2016 | Census   | 5-year age groups  | De facto | Included |
| Liberia    | 1962 | Census   | 5-year age groups  | De facto | Included |
| Liberia    | 1974 | Census   | 5-year age groups  | De facto | Included |
| Liberia    | 1984 | Census   | 1-year age groups  | De facto | Included |
| Liberia    | 2008 | Census   | 1-year age groups  | De facto | Included |
| Libya      | 1954 | Census   | 5-year age groups  | De facto | Included |
| Libya      | 1964 | Census   | non-std age groups | De facto | Included |
| Libya      | 1973 | Census   | 1-year age groups  | De jure  | Included |
| Libya      | 1984 | Census   | 1-year age groups  | De facto | Included |
| Libya      | 1995 | Census   | all ages only      | Unknown  | Included |
| Libya      | 2006 | Census   | 5-year age groups  | De facto | Included |
| Lithuania  | 1959 | Census   | non-std age groups | De facto | Included |
| Lithuania  | 1970 | Census   | non-std age groups | De facto | Included |
| Lithuania  | 1979 | Census   | 5-year age groups  | De facto | Included |

|            |      |          |                    |          |          |
|------------|------|----------|--------------------|----------|----------|
| Lithuania  | 1989 | Census   | 1-year age groups  | De jure  | Included |
| Lithuania  | 2001 | Census   | 5-year age groups  | De jure  | Included |
| Lithuania  | 2011 | Census   | 1-year age groups  | De jure  | Included |
| Lithuania  | 2015 | Registry | 1-year age groups  | NA       | Included |
| Lithuania  | 2016 | Registry | 1-year age groups  | NA       | Included |
| Lithuania  | 2017 | Registry | 1-year age groups  | NA       | Included |
| Luxembourg | 1960 | Census   | 1-year age groups  | De jure  | Included |
| Luxembourg | 1966 | Census   | 5-year age groups  | De jure  | Included |
| Luxembourg | 1970 | Census   | 1-year age groups  | De jure  | Included |
| Luxembourg | 1981 | Census   | 1-year age groups  | De jure  | Included |
| Luxembourg | 1991 | Census   | 5-year age groups  | De jure  | Included |
| Luxembourg | 2001 | Registry | 5-year age groups  | NA       | Included |
| Luxembourg | 2002 | Registry | 5-year age groups  | NA       | Included |
| Luxembourg | 2003 | Registry | 5-year age groups  | NA       | Included |
| Luxembourg | 2004 | Registry | 5-year age groups  | NA       | Included |
| Luxembourg | 2005 | Registry | 5-year age groups  | NA       | Included |
| Luxembourg | 2006 | Registry | 5-year age groups  | NA       | Included |
| Luxembourg | 2007 | Registry | 5-year age groups  | NA       | Included |
| Luxembourg | 2008 | Registry | 5-year age groups  | NA       | Included |
| Luxembourg | 2009 | Registry | 5-year age groups  | NA       | Included |
| Luxembourg | 2010 | Registry | 5-year age groups  | NA       | Included |
| Luxembourg | 2011 | Registry | 5-year age groups  | NA       | Included |
| Luxembourg | 2012 | Registry | 5-year age groups  | NA       | Included |
| Luxembourg | 2013 | Registry | 5-year age groups  | NA       | Included |
| Luxembourg | 2014 | Registry | 5-year age groups  | NA       | Included |
| Luxembourg | 2015 | Registry | 5-year age groups  | NA       | Included |
| Luxembourg | 2016 | Registry | 5-year age groups  | NA       | Included |
| Luxembourg | 2017 | Registry | 5-year age groups  | NA       | Included |
| Madagascar | 1975 | Census   | 5-year age groups  | De facto | Included |
| Madagascar | 1993 | Census   | 5-year age groups  | De facto | Included |
| Madagascar | 2018 | Census   | 5-year age groups  | De jure  | Included |
| Malawi     | 1966 | Census   | 5-year age groups  | De facto | Included |
| Malawi     | 1977 | Census   | 5-year age groups  | De facto | Included |
| Malawi     | 1987 | Census   | 1-year age groups  | De facto | Included |
| Malawi     | 1998 | Census   | 1-year age groups  | De facto | Included |
| Malawi     | 2008 | Census   | 1-year age groups  | De facto | Included |
| Malawi     | 2018 | Census   | 5-year age groups  | De jure  | Included |
| Malaysia   | 1991 | Census   | 1-year age groups  | De facto | Included |
| Malaysia   | 2000 | Census   | 5-year age groups  | De jure  | Included |
| Malaysia   | 2010 | Census   | 1-year age groups  | De jure  | Included |
| Maldives   | 1953 | Census   | all ages only      | De jure  | Included |
| Maldives   | 1957 | Census   | all ages only      | De jure  | Included |
| Maldives   | 1962 | Census   | all ages only      | De jure  | Included |
| Maldives   | 1965 | Census   | non-std age groups | De facto | Excluded |
| Maldives   | 1967 | Census   | 1-year age groups  | De facto | Included |
| Maldives   | 1972 | Census   | all ages only      | De jure  | Included |
| Maldives   | 1974 | Census   | 5-year age groups  | De facto | Included |
| Maldives   | 1977 | Census   | 5-year age groups  | De facto | Included |
| Maldives   | 1985 | Census   | 1-year age groups  | De facto | Included |
| Maldives   | 1990 | Census   | 1-year age groups  | De facto | Included |
| Maldives   | 1995 | Census   | 1-year age groups  | De facto | Included |
| Maldives   | 2000 | Census   | 1-year age groups  | De facto | Included |
| Maldives   | 2006 | Census   | 1-year age groups  | De facto | Included |
| Maldives   | 2014 | Census   | 1-year age groups  | De facto | Included |
| Mali       | 1976 | Census   | 5-year age groups  | De facto | Included |
| Mali       | 1987 | Census   | 1-year age groups  | De jure  | Included |

|                  |      |        |                    |          |          |
|------------------|------|--------|--------------------|----------|----------|
| Mali             | 1998 | Census | 5-year age groups  | De jure  | Included |
| Mali             | 2009 | Census | 1-year age groups  | De facto | Included |
| Malta            | 1957 | Census | 5-year age groups  | De facto | Included |
| Malta            | 1967 | Census | 5-year age groups  | De facto | Included |
| Malta            | 1985 | Census | 5-year age groups  | De facto | Included |
| Malta            | 1995 | Census | 1-year age groups  | De jure  | Included |
| Malta            | 2005 | Census | 1-year age groups  | De jure  | Included |
| Malta            | 2011 | Census | 1-year age groups  | De facto | Included |
| Marshall Islands | 1973 | Census | 5-year age groups  | De facto | Excluded |
| Marshall Islands | 1988 | Census | 1-year age groups  | De facto | Included |
| Marshall Islands | 1999 | Census | 1-year age groups  | De facto | Included |
| Marshall Islands | 2011 | Census | 1-year age groups  | De facto | Excluded |
| Marshall Islands | 2011 | Census | all ages only      | De jure  | Included |
| Mauritania       | 1977 | Census | 5-year age groups  | De facto | Included |
| Mauritania       | 1988 | Census | 5-year age groups  | De facto | Included |
| Mauritania       | 2000 | Census | 5-year age groups  | De facto | Included |
| Mauritania       | 2013 | Census | 5-year age groups  | De jure  | Included |
| Mauritius        | 1952 | Census | 1-year age groups  | De jure  | Included |
| Mauritius        | 1962 | Census | 1-year age groups  | De facto | Included |
| Mauritius        | 1972 | Census | 1-year age groups  | De jure  | Included |
| Mauritius        | 1983 | Census | all ages only      | De jure  | Included |
| Mauritius        | 1990 | Census | 1-year age groups  | De facto | Included |
| Mauritius        | 2000 | Census | 1-year age groups  | De jure  | Included |
| Mauritius        | 2011 | Census | 1-year age groups  | De jure  | Included |
| Mexico           | 1950 | Census | 1-year age groups  | De jure  | Included |
| Mexico           | 1960 | Census | 5-year age groups  | De jure  | Excluded |
| Mexico           | 1970 | Census | 1-year age groups  | De jure  | Included |
| Mexico           | 1980 | Census | 1-year age groups  | De jure  | Included |
| Mexico           | 1990 | Census | 1-year age groups  | De jure  | Included |
| Mexico           | 1995 | Census | 5-year age groups  | Unknown  | Included |
| Mexico           | 2000 | Census | 1-year age groups  | De jure  | Included |
| Mexico           | 2005 | Census | 1-year age groups  | De jure  | Excluded |
| Mexico           | 2010 | Census | 1-year age groups  | De facto | Included |
| Mexico           | 2020 | Census | 1-year age groups  | De jure  | Included |
| Moldova          | 1959 | Census | non-std age groups | De facto | Included |
| Moldova          | 1970 | Census | non-std age groups | De facto | Included |
| Moldova          | 1979 | Census | 5-year age groups  | De facto | Included |
| Moldova          | 1989 | Census | 1-year age groups  | De jure  | Included |
| Monaco           | 1951 | Census | 5-year age groups  | De jure  | Included |
| Monaco           | 1956 | Census | 5-year age groups  | De jure  | Included |
| Monaco           | 1961 | Census | 1-year age groups  | De jure  | Excluded |
| Monaco           | 1962 | Census | 5-year age groups  | De jure  | Included |
| Monaco           | 1968 | Census | 5-year age groups  | De jure  | Included |
| Monaco           | 1975 | Census | 5-year age groups  | De jure  | Excluded |
| Monaco           | 1982 | Census | 5-year age groups  | De jure  | Excluded |
| Monaco           | 1990 | Census | non-std age groups | De jure  | Excluded |
| Monaco           | 2000 | Census | 5-year age groups  | Unknown  | Included |
| Monaco           | 2008 | Census | 5-year age groups  | De jure  | Excluded |
| Monaco           | 2016 | Census | 5-year age groups  | De jure  | Excluded |
| Mongolia         | 1956 | Census | non-std age groups | De facto | Included |
| Mongolia         | 1963 | Census | 5-year age groups  | De jure  | Included |
| Mongolia         | 1969 | Census | 5-year age groups  | De jure  | Included |
| Mongolia         | 1979 | Census | 5-year age groups  | De jure  | Included |
| Mongolia         | 1989 | Census | 5-year age groups  | De facto | Included |
| Mongolia         | 2000 | Census | 1-year age groups  | De facto | Included |
| Mongolia         | 2010 | Census | 1-year age groups  | De jure  | Included |

|             |      |          |                    |          |          |
|-------------|------|----------|--------------------|----------|----------|
| Mongolia    | 2020 | Census   | 5-year age groups  | De jure  | Included |
| Montenegro  | 1953 | Census   | 5-year age groups  | De jure  | Included |
| Montenegro  | 1961 | Census   | 5-year age groups  | De jure  | Included |
| Montenegro  | 1971 | Census   | 5-year age groups  | De jure  | Included |
| Montenegro  | 1981 | Census   | 5-year age groups  | De jure  | Included |
| Montenegro  | 1991 | Census   | 5-year age groups  | De facto | Included |
| Montenegro  | 2003 | Census   | 1-year age groups  | De jure  | Included |
| Montenegro  | 2011 | Census   | 1-year age groups  | De jure  | Included |
| Morocco     | 1950 | Census   | all ages only      | De jure  | Excluded |
| Morocco     | 1960 | Census   | 5-year age groups  | De jure  | Included |
| Morocco     | 1971 | Census   | 1-year age groups  | De jure  | Included |
| Morocco     | 1982 | Census   | 5-year age groups  | De facto | Included |
| Morocco     | 1994 | Census   | 5-year age groups  | De facto | Included |
| Morocco     | 2004 | Census   | 1-year age groups  | De facto | Included |
| Morocco     | 2014 | Census   | 5-year age groups  | De jure  | Included |
| Mozambique  | 1950 | Census   | 5-year age groups  | De facto | Included |
| Mozambique  | 1960 | Census   | 5-year age groups  | De jure  | Included |
| Mozambique  | 1970 | Census   | 5-year age groups  | De facto | Included |
| Mozambique  | 1980 | Census   | 1-year age groups  | De facto | Included |
| Mozambique  | 1997 | Census   | 1-year age groups  | De jure  | Included |
| Mozambique  | 2007 | Census   | 1-year age groups  | De facto | Included |
| Mozambique  | 2017 | Census   | 1-year age groups  | De jure  | Included |
| Myanmar     | 1953 | Census   | all ages only      | Unknown  | Excluded |
| Myanmar     | 1973 | Census   | 5-year age groups  | De jure  | Included |
| Myanmar     | 1983 | Census   | 1-year age groups  | De facto | Included |
| Myanmar     | 2014 | Census   | 1-year age groups  | De facto | Included |
| Namibia     | 1951 | Census   | 5-year age groups  | De facto | Excluded |
| Namibia     | 1960 | Census   | 5-year age groups  | De facto | Included |
| Namibia     | 1970 | Census   | all ages only      | De jure  | Included |
| Namibia     | 1991 | Census   | 1-year age groups  | De facto | Included |
| Namibia     | 2001 | Census   | 1-year age groups  | De facto | Included |
| Namibia     | 2011 | Census   | 1-year age groups  | De facto | Included |
| Nauru       | 1961 | Census   | 5-year age groups  | De facto | Excluded |
| Nauru       | 1966 | Census   | 5-year age groups  | De facto | Excluded |
| Nauru       | 1977 | Census   | 5-year age groups  | De facto | Excluded |
| Nauru       | 1992 | Census   | 5-year age groups  | De facto | Excluded |
| Nauru       | 2002 | Census   | 5-year age groups  | De facto | Excluded |
| Nauru       | 2006 | Census   | 5-year age groups  | Unknown  | Excluded |
| Nauru       | 2011 | Census   | 5-year age groups  | Unknown  | Included |
| Nepal       | 1954 | Census   | 5-year age groups  | De facto | Included |
| Nepal       | 1961 | Census   | 5-year age groups  | De facto | Included |
| Nepal       | 1971 | Census   | non-std age groups | De jure  | Included |
| Nepal       | 1981 | Census   | 1-year age groups  | De jure  | Included |
| Nepal       | 1991 | Census   | 1-year age groups  | De jure  | Included |
| Nepal       | 2001 | Census   | 1-year age groups  | De jure  | Included |
| Nepal       | 2011 | Census   | 1-year age groups  | De jure  | Included |
| Netherlands | 1950 | Registry | 1-year age groups  | NA       | Included |
| Netherlands | 1951 | Registry | 1-year age groups  | NA       | Included |
| Netherlands | 1952 | Registry | 1-year age groups  | NA       | Included |
| Netherlands | 1953 | Registry | 1-year age groups  | NA       | Included |
| Netherlands | 1954 | Registry | 1-year age groups  | NA       | Included |
| Netherlands | 1955 | Registry | 1-year age groups  | NA       | Included |
| Netherlands | 1956 | Registry | 1-year age groups  | NA       | Included |
| Netherlands | 1957 | Registry | 1-year age groups  | NA       | Included |
| Netherlands | 1958 | Registry | 1-year age groups  | NA       | Included |
| Netherlands | 1959 | Registry | 1-year age groups  | NA       | Included |



|                          |      |          |                    |              |          |
|--------------------------|------|----------|--------------------|--------------|----------|
| Netherlands              | 2015 | Registry | 1-year age groups  | NA           | Included |
| Netherlands              | 2016 | Registry | 1-year age groups  | NA           | Included |
| Netherlands              | 2017 | Registry | 1-year age groups  | NA           | Included |
| New Zealand              | 1951 | Census   | 1-year age groups  | De facto     | Included |
| New Zealand              | 1956 | Census   | 5-year age groups  | De jure      | Included |
| New Zealand              | 1961 | Census   | 1-year age groups  | De jure      | Included |
| New Zealand              | 1966 | Census   | 5-year age groups  | De facto     | Included |
| New Zealand              | 1971 | Census   | 5-year age groups  | De facto     | Included |
| New Zealand              | 1976 | Census   | 5-year age groups  | De facto     | Included |
| New Zealand              | 1981 | Census   | 1-year age groups  | De jure      | Included |
| New Zealand              | 1986 | Census   | 1-year age groups  | De jure      | Included |
| New Zealand              | 1991 | Census   | 1-year age groups  | De facto     | Included |
| New Zealand              | 1996 | Census   | 5-year age groups  | De jure      | Excluded |
| New Zealand              | 2001 | Census   | 5-year age groups  | De jure      | Excluded |
| New Zealand              | 2006 | Census   | 5-year age groups  | De jure      | Excluded |
| New Zealand              | 2013 | Census   | 5-year age groups  | De jure      | Excluded |
| New Zealand              | 2018 | Census   | 1-year age groups  | De jure      | Included |
| Nicaragua                | 1950 | Census   | 1-year age groups  | De jure      | Included |
| Nicaragua                | 1963 | Census   | 1-year age groups  | De jure      | Included |
| Nicaragua                | 1971 | Census   | 1-year age groups  | De jure      | Included |
| Nicaragua                | 1995 | Census   | 1-year age groups  | Unknown      | Included |
| Nicaragua                | 2005 | Census   | 1-year age groups  | De jure      | Included |
| Niger                    | 1977 | Census   | 5-year age groups  | De jure      | Included |
| Niger                    | 1988 | Census   | 5-year age groups  | De facto     | Included |
| Niger                    | 2001 | Census   | 1-year age groups  | De jure      | Included |
| Niger                    | 2012 | Census   | 1-year age groups  | De jure      | Included |
| Nigeria                  | 1953 | Census   | non-std age groups | De facto     | Excluded |
| Nigeria                  | 1963 | Census   | 1-year age groups  | De facto     | Excluded |
| Nigeria                  | 1991 | Census   | 1-year age groups  | De facto     | Included |
| Nigeria                  | 2006 | Census   | 5-year age groups  | De facto     | Included |
| Nigeria                  | 2014 | Census   | 5-year age groups  | Micro-census | Included |
| Niue                     | 1951 | Census   | 5-year age groups  | De facto     | Excluded |
| Niue                     | 1956 | Census   | 1-year age groups  | De facto     | Included |
| Niue                     | 1961 | Census   | 1-year age groups  | De facto     | Included |
| Niue                     | 1966 | Census   | 5-year age groups  | De jure      | Included |
| Niue                     | 1971 | Census   | 1-year age groups  | De facto     | Excluded |
| Niue                     | 1976 | Census   | 5-year age groups  | De facto     | Excluded |
| Niue                     | 1979 | Census   | 5-year age groups  | De facto     | Excluded |
| Niue                     | 1981 | Census   | 5-year age groups  | De facto     | Included |
| Niue                     | 1984 | Census   | 1-year age groups  | De facto     | Included |
| Niue                     | 1986 | Census   | 1-year age groups  | De facto     | Included |
| Niue                     | 1997 | Census   | 5-year age groups  | De facto     | Excluded |
| Niue                     | 2001 | Census   | 5-year age groups  | De facto     | Excluded |
| Niue                     | 2006 | Census   | 5-year age groups  | De jure      | Included |
| Niue                     | 2011 | Census   | 5-year age groups  | De facto     | Included |
| North Korea              | 1993 | Census   | 1-year age groups  | De jure      | Included |
| North Korea              | 2008 | Census   | 1-year age groups  | De jure      | Included |
| North Macedonia          | 1953 | Census   | 5-year age groups  | De jure      | Included |
| North Macedonia          | 1961 | Census   | 5-year age groups  | De jure      | Included |
| North Macedonia          | 1971 | Census   | 5-year age groups  | De jure      | Included |
| North Macedonia          | 1981 | Census   | 5-year age groups  | De jure      | Included |
| North Macedonia          | 1991 | Census   | 5-year age groups  | De jure      | Excluded |
| North Macedonia          | 1992 | Census   | 5-year age groups  | Unknown      | Excluded |
| North Macedonia          | 1994 | Census   | 5-year age groups  | De jure      | Included |
| North Macedonia          | 2002 | Census   | 5-year age groups  | De jure      | Excluded |
| Northern Mariana Islands | 1958 | Census   | 5-year age groups  | De jure      | Excluded |

|                          |      |          |                    |          |          |
|--------------------------|------|----------|--------------------|----------|----------|
| Northern Mariana Islands | 1970 | Census   | non-std age groups | De jure  | Included |
| Northern Mariana Islands | 1973 | Census   | 1-year age groups  | De facto | Excluded |
| Northern Mariana Islands | 1980 | Census   | 5-year age groups  | De facto | Included |
| Northern Mariana Islands | 1990 | Census   | 1-year age groups  | De facto | Included |
| Northern Mariana Islands | 1995 | Census   | 5-year age groups  | De facto | Included |
| Northern Mariana Islands | 2000 | Census   | non-std age groups | De jure  | Included |
| Northern Mariana Islands | 2010 | Census   | 5-year age groups  | De facto | Included |
| Northern Mariana Islands | 2020 | Census   | 5-year age groups  | De jure  | Included |
| Norway                   | 1950 | Census   | 5-year age groups  | De jure  | Excluded |
| Norway                   | 1960 | Census   | 5-year age groups  | De jure  | Excluded |
| Norway                   | 1970 | Census   | 1-year age groups  | De jure  | Included |
| Norway                   | 1980 | Census   | 1-year age groups  | De jure  | Included |
| Norway                   | 1990 | Census   | 5-year age groups  | De jure  | Included |
| Norway                   | 2001 | Census   | 1-year age groups  | De jure  | Excluded |
| Norway                   | 2011 | Census   | 1-year age groups  | De jure  | Excluded |
| Oman                     | 1993 | Census   | 5-year age groups  | De facto | Included |
| Oman                     | 2003 | Census   | 1-year age groups  | De facto | Included |
| Oman                     | 2010 | Census   | 5-year age groups  | De facto | Included |
| Oman                     | 2012 | Registry | 5-year age groups  | NA       | Included |
| Oman                     | 2013 | Registry | 5-year age groups  | NA       | Included |
| Oman                     | 2014 | Registry | 5-year age groups  | NA       | Included |
| Oman                     | 2015 | Registry | 5-year age groups  | NA       | Included |
| Oman                     | 2016 | Registry | 5-year age groups  | NA       | Included |
| Oman                     | 2017 | Registry | 5-year age groups  | NA       | Included |
| Oman                     | 2020 | Census   | 5-year age groups  | Unknown  | Included |
| Pakistan                 | 1951 | Census   | non-std age groups | De jure  | Included |
| Pakistan                 | 1961 | Census   | non-std age groups | De jure  | Included |
| Pakistan                 | 1972 | Census   | 5-year age groups  | De facto | Excluded |
| Pakistan                 | 1981 | Census   | 1-year age groups  | De facto | Included |
| Pakistan                 | 1998 | Census   | 5-year age groups  | De facto | Included |
| Pakistan                 | 2017 | Census   | all ages only      | Unknown  | Included |
| Palau                    | 1958 | Census   | 5-year age groups  | De facto | Included |
| Palau                    | 1967 | Census   | 5-year age groups  | De facto | Included |
| Palau                    | 1970 | Census   | 5-year age groups  | De jure  | Excluded |
| Palau                    | 1973 | Census   | 5-year age groups  | De facto | Excluded |
| Palau                    | 1980 | Census   | 5-year age groups  | De facto | Excluded |
| Palau                    | 1986 | Census   | 5-year age groups  | De facto | Excluded |
| Palau                    | 1990 | Census   | 5-year age groups  | De jure  | Excluded |
| Palau                    | 1995 | Census   | 5-year age groups  | De facto | Included |
| Palau                    | 2000 | Census   | 1-year age groups  | De jure  | Excluded |
| Palau                    | 2003 | Census   | non-std age groups | Unknown  | Excluded |
| Palau                    | 2005 | Census   | 5-year age groups  | De jure  | Included |
| Palau                    | 2012 | Census   | 5-year age groups  | De jure  | Excluded |
| Palau                    | 2015 | Census   | 5-year age groups  | De jure  | Excluded |
| Palestine                | 1967 | Census   | 5-year age groups  | De jure  | Included |
| Palestine                | 1997 | Census   | 1-year age groups  | De facto | Included |
| Palestine                | 2007 | Census   | 1-year age groups  | De facto | Included |
| Palestine                | 2017 | Census   | 5-year age groups  | De facto | Excluded |
| Panama                   | 1950 | Census   | 1-year age groups  | De facto | Included |
| Panama                   | 1960 | Census   | 1-year age groups  | De facto | Included |
| Panama                   | 1970 | Census   | 5-year age groups  | De facto | Included |
| Panama                   | 1980 | Census   | 1-year age groups  | De facto | Included |
| Panama                   | 1990 | Census   | 1-year age groups  | De facto | Included |
| Panama                   | 2000 | Census   | 1-year age groups  | De facto | Included |
| Panama                   | 2010 | Census   | 5-year age groups  | De facto | Included |
| Papua New Guinea         | 1961 | Census   | 1-year age groups  | De facto | Excluded |

|                  |      |          |                   |          |          |
|------------------|------|----------|-------------------|----------|----------|
| Papua New Guinea | 1966 | Census   | 5-year age groups | De facto | Included |
| Papua New Guinea | 1971 | Census   | 1-year age groups | De facto | Included |
| Papua New Guinea | 1980 | Census   | 1-year age groups | De facto | Included |
| Papua New Guinea | 1990 | Census   | 5-year age groups | De facto | Excluded |
| Papua New Guinea | 2000 | Census   | 1-year age groups | De facto | Included |
| Papua New Guinea | 2011 | Census   | 5-year age groups | De facto | Included |
| Paraguay         | 1950 | Census   | 1-year age groups | De facto | Included |
| Paraguay         | 1962 | Census   | 1-year age groups | De facto | Included |
| Paraguay         | 1972 | Census   | 1-year age groups | De facto | Included |
| Paraguay         | 1982 | Census   | 1-year age groups | De facto | Included |
| Paraguay         | 1992 | Census   | 1-year age groups | De facto | Included |
| Paraguay         | 2002 | Census   | 1-year age groups | De facto | Included |
| Peru             | 1961 | Census   | 1-year age groups | De facto | Included |
| Peru             | 1972 | Census   | 1-year age groups | De facto | Included |
| Peru             | 1981 | Census   | 1-year age groups | De facto | Included |
| Peru             | 1993 | Census   | 1-year age groups | Unknown  | Included |
| Peru             | 2005 | Census   | 1-year age groups | De facto | Included |
| Peru             | 2007 | Census   | 1-year age groups | De facto | Included |
| Peru             | 2012 | Registry | all ages only     | NA       | Included |
| Peru             | 2013 | Registry | all ages only     | NA       | Included |
| Peru             | 2014 | Registry | all ages only     | NA       | Included |
| Peru             | 2015 | Registry | all ages only     | NA       | Included |
| Peru             | 2016 | Registry | all ages only     | NA       | Included |
| Peru             | 2017 | Census   | 1-year age groups | De facto | Excluded |
| Peru             | 2017 | Registry | all ages only     | NA       | Included |
| Philippines      | 1960 | Census   | 1-year age groups | De jure  | Included |
| Philippines      | 1970 | Census   | 1-year age groups | De jure  | Included |
| Philippines      | 1975 | Census   | 5-year age groups | De jure  | Included |
| Philippines      | 1980 | Census   | 5-year age groups | De jure  | Included |
| Philippines      | 1990 | Census   | 1-year age groups | De jure  | Included |
| Philippines      | 1995 | Census   | 1-year age groups | De jure  | Included |
| Philippines      | 2000 | Census   | 1-year age groups | De jure  | Included |
| Philippines      | 2007 | Census   | 1-year age groups | De jure  | Included |
| Philippines      | 2010 | Census   | 5-year age groups | De jure  | Included |
| Philippines      | 2015 | Census   | 1-year age groups | De jure  | Included |
| Poland           | 1950 | Census   | 5-year age groups | De facto | Included |
| Poland           | 1960 | Census   | 5-year age groups | De facto | Included |
| Poland           | 1970 | Census   | 1-year age groups | De facto | Included |
| Poland           | 1978 | Census   | 5-year age groups | De facto | Included |
| Poland           | 1988 | Census   | 1-year age groups | De facto | Included |
| Poland           | 2002 | Census   | 1-year age groups | De jure  | Included |
| Poland           | 2006 | Registry | 1-year age groups | NA       | Included |
| Poland           | 2007 | Registry | 1-year age groups | NA       | Included |
| Poland           | 2008 | Registry | 1-year age groups | NA       | Included |
| Poland           | 2009 | Registry | 1-year age groups | NA       | Included |
| Poland           | 2010 | Registry | 1-year age groups | NA       | Included |
| Poland           | 2011 | Census   | 1-year age groups | De jure  | Excluded |
| Poland           | 2012 | Registry | 1-year age groups | NA       | Included |
| Poland           | 2013 | Registry | 1-year age groups | NA       | Included |
| Poland           | 2014 | Registry | 1-year age groups | NA       | Included |
| Poland           | 2015 | Registry | 1-year age groups | NA       | Included |
| Poland           | 2016 | Registry | 1-year age groups | NA       | Included |
| Poland           | 2017 | Registry | 1-year age groups | NA       | Included |
| Poland           | 2017 | Census   | 1-year age groups | Unknown  | Excluded |
| Portugal         | 1950 | Census   | 1-year age groups | De facto | Included |
| Portugal         | 1960 | Census   | 5-year age groups | De facto | Included |



|                                  |      |        |                   |          |          |
|----------------------------------|------|--------|-------------------|----------|----------|
| Portugal                         | 1970 | Census | 1-year age groups | De facto | Included |
| Portugal                         | 1981 | Census | 1-year age groups | De facto | Included |
| Portugal                         | 1991 | Census | 1-year age groups | De facto | Included |
| Portugal                         | 2001 | Census | 5-year age groups | De facto | Included |
| Portugal                         | 2011 | Census | 1-year age groups | De jure  | Included |
| Puerto Rico                      | 1950 | Census | 1-year age groups | De jure  | Included |
| Puerto Rico                      | 1960 | Census | 5-year age groups | De jure  | Included |
| Puerto Rico                      | 1970 | Census | 1-year age groups | De jure  | Included |
| Puerto Rico                      | 1980 | Census | 1-year age groups | De jure  | Included |
| Puerto Rico                      | 1990 | Census | 1-year age groups | De jure  | Included |
| Puerto Rico                      | 2000 | Census | 1-year age groups | De jure  | Included |
| Puerto Rico                      | 2010 | Census | 1-year age groups | De jure  | Included |
| Puerto Rico                      | 2020 | Census | all ages only     | De jure  | Included |
| Qatar                            | 1986 | Census | 1-year age groups | De facto | Included |
| Qatar                            | 1997 | Census | 5-year age groups | De facto | Included |
| Qatar                            | 2004 | Census | 5-year age groups | De facto | Included |
| Qatar                            | 2010 | Census | 5-year age groups | De facto | Included |
| Qatar                            | 2015 | Census | 5-year age groups | De jure  | Excluded |
| Qatar                            | 2020 | Census | 5-year age groups | De jure  | Included |
| Romania                          | 1956 | Census | 5-year age groups | De jure  | Included |
| Romania                          | 1966 | Census | 5-year age groups | De jure  | Excluded |
| Romania                          | 1977 | Census | 5-year age groups | De facto | Included |
| Romania                          | 1992 | Census | 1-year age groups | De jure  | Included |
| Romania                          | 2002 | Census | 1-year age groups | De jure  | Included |
| Romania                          | 2011 | Census | 1-year age groups | De facto | Included |
| Russia                           | 1959 | Census | 5-year age groups | De facto | Included |
| Russia                           | 1970 | Census | 5-year age groups | De facto | Included |
| Russia                           | 1979 | Census | 5-year age groups | De jure  | Included |
| Russia                           | 1989 | Census | 1-year age groups | De jure  | Included |
| Russia                           | 2002 | Census | 5-year age groups | De jure  | Included |
| Russia                           | 2010 | Census | 1-year age groups | De jure  | Included |
| Rwanda                           | 1978 | Census | 5-year age groups | De facto | Included |
| Rwanda                           | 1991 | Census | 5-year age groups | De facto | Included |
| Rwanda                           | 2002 | Census | 1-year age groups | De jure  | Included |
| Rwanda                           | 2012 | Census | 1-year age groups | De jure  | Included |
| Saint Kitts and Nevis            | 1960 | Census | 1-year age groups | De facto | Excluded |
| Saint Kitts and Nevis            | 1970 | Census | 1-year age groups | De facto | Included |
| Saint Kitts and Nevis            | 1980 | Census | 5-year age groups | Unknown  | Included |
| Saint Kitts and Nevis            | 1991 | Census | 5-year age groups | De facto | Excluded |
| Saint Kitts and Nevis            | 2001 | Census | 5-year age groups | Unknown  | Included |
| Saint Lucia                      | 1960 | Census | 5-year age groups | De facto | Included |
| Saint Lucia                      | 1970 | Census | 5-year age groups | De facto | Included |
| Saint Lucia                      | 1980 | Census | 1-year age groups | De facto | Included |
| Saint Lucia                      | 1991 | Census | 1-year age groups | De facto | Included |
| Saint Lucia                      | 2001 | Census | 1-year age groups | De facto | Included |
| Saint Lucia                      | 2010 | Census | 5-year age groups | De jure  | Included |
| Saint Vincent and the Grenadines | 1960 | Census | 5-year age groups | De facto | Included |
| Saint Vincent and the Grenadines | 1970 | Census | 5-year age groups | De facto | Included |
| Saint Vincent and the Grenadines | 1980 | Census | 1-year age groups | De facto | Included |
| Saint Vincent and the Grenadines | 1991 | Census | 1-year age groups | De facto | Included |
| Saint Vincent and the Grenadines | 2001 | Census | 1-year age groups | De facto | Included |
| Saint Vincent and the Grenadines | 2012 | Census | 5-year age groups | De jure  | Included |
| Samoa                            | 1951 | Census | 5-year age groups | De facto | Included |
| Samoa                            | 1956 | Census | 1-year age groups | De facto | Included |
| Samoa                            | 1961 | Census | 5-year age groups | De facto | Included |
| Samoa                            | 1966 | Census | 5-year age groups | De facto | Included |

|                            |      |          |                    |          |          |
|----------------------------|------|----------|--------------------|----------|----------|
| Samoa                      | 1971 | Census   | 1-year age groups  | De facto | Included |
| Samoa                      | 1976 | Census   | 5-year age groups  | De facto | Included |
| Samoa                      | 1981 | Census   | 5-year age groups  | De facto | Included |
| Samoa                      | 1986 | Census   | 5-year age groups  | De facto | Included |
| Samoa                      | 1991 | Census   | 5-year age groups  | De facto | Included |
| Samoa                      | 2001 | Census   | 1-year age groups  | De facto | Included |
| Samoa                      | 2006 | Census   | 5-year age groups  | De facto | Included |
| Samoa                      | 2011 | Census   | 1-year age groups  | De facto | Included |
| Samoa                      | 2016 | Census   | 1-year age groups  | De facto | Excluded |
| San Marino                 | 1976 | Census   | 5-year age groups  | De facto | Excluded |
| San Marino                 | 2010 | Census   | non-std age groups | De facto | Included |
| Saudi Arabia               | 1974 | Census   | all ages only      | Unknown  | Included |
| Saudi Arabia               | 1992 | Census   | 5-year age groups  | De facto | Included |
| Saudi Arabia               | 2004 | Census   | 5-year age groups  | De facto | Included |
| Saudi Arabia               | 2010 | Census   | 5-year age groups  | De facto | Included |
| Senegal                    | 1976 | Census   | 5-year age groups  | De jure  | Included |
| Senegal                    | 1988 | Census   | 5-year age groups  | De jure  | Included |
| Senegal                    | 2002 | Census   | 5-year age groups  | De jure  | Included |
| Senegal                    | 2013 | Census   | 5-year age groups  | De facto | Included |
| Seychelles                 | 1960 | Census   | 5-year age groups  | De facto | Included |
| Seychelles                 | 1971 | Census   | 1-year age groups  | De jure  | Included |
| Seychelles                 | 1977 | Census   | 5-year age groups  | De facto | Included |
| Seychelles                 | 1987 | Census   | 1-year age groups  | De facto | Included |
| Seychelles                 | 1994 | Census   | 5-year age groups  | De facto | Included |
| Seychelles                 | 1997 | Census   | 1-year age groups  | De facto | Included |
| Seychelles                 | 2002 | Census   | 1-year age groups  | De jure  | Included |
| Seychelles                 | 2010 | Census   | 1-year age groups  | De facto | Included |
| Sierra Leone               | 1963 | Census   | 5-year age groups  | De facto | Included |
| Sierra Leone               | 1974 | Census   | 5-year age groups  | De facto | Included |
| Sierra Leone               | 1985 | Census   | 1-year age groups  | De facto | Included |
| Sierra Leone               | 2004 | Census   | 1-year age groups  | Unknown  | Included |
| Sierra Leone               | 2015 | Census   | 5-year age groups  | De facto | Included |
| Singapore                  | 1957 | Census   | 5-year age groups  | De facto | Included |
| Singapore                  | 1970 | Census   | 1-year age groups  | De facto | Included |
| Singapore                  | 1980 | Census   | 1-year age groups  | De facto | Included |
| Singapore (Residents Only) | 1990 | Registry | non-std age groups | NA       | Included |
| Singapore (Residents Only) | 1991 | Registry | non-std age groups | NA       | Included |
| Singapore (Residents Only) | 1992 | Registry | non-std age groups | NA       | Included |
| Singapore (Residents Only) | 1993 | Registry | non-std age groups | NA       | Included |
| Singapore (Residents Only) | 1994 | Registry | non-std age groups | NA       | Included |
| Singapore (Residents Only) | 1995 | Registry | non-std age groups | NA       | Included |
| Singapore (Residents Only) | 1996 | Registry | non-std age groups | NA       | Included |
| Singapore (Residents Only) | 1997 | Registry | non-std age groups | NA       | Included |
| Singapore (Residents Only) | 1998 | Registry | non-std age groups | NA       | Included |
| Singapore (Residents Only) | 1999 | Registry | non-std age groups | NA       | Included |
| Singapore (Residents Only) | 2000 | Registry | non-std age groups | NA       | Included |
| Singapore (Residents Only) | 2001 | Registry | non-std age groups | NA       | Included |
| Singapore (Residents Only) | 2002 | Registry | non-std age groups | NA       | Included |
| Singapore (Residents Only) | 2003 | Registry | non-std age groups | NA       | Included |
| Singapore (Residents Only) | 2004 | Registry | non-std age groups | NA       | Included |
| Singapore (Residents Only) | 2005 | Registry | non-std age groups | NA       | Included |
| Singapore (Residents Only) | 2006 | Registry | non-std age groups | NA       | Included |
| Singapore (Residents Only) | 2007 | Registry | non-std age groups | NA       | Included |
| Singapore (Residents Only) | 2008 | Registry | non-std age groups | NA       | Included |
| Singapore (Residents Only) | 2009 | Registry | non-std age groups | NA       | Included |
| Singapore (Residents Only) | 2010 | Registry | non-std age groups | NA       | Included |

|                            |      |          |                    |         |          |
|----------------------------|------|----------|--------------------|---------|----------|
| Singapore (Residents Only) | 2011 | Registry | non-std age groups | NA      | Included |
| Singapore (Residents Only) | 2012 | Registry | non-std age groups | NA      | Included |
| Singapore (Residents Only) | 2013 | Registry | non-std age groups | NA      | Included |
| Singapore (Residents Only) | 2014 | Registry | non-std age groups | NA      | Included |
| Singapore (Residents Only) | 2015 | Registry | non-std age groups | NA      | Included |
| Singapore (Residents Only) | 2016 | Registry | non-std age groups | NA      | Included |
| Singapore (Residents Only) | 2017 | Registry | non-std age groups | NA      | Included |
| Singapore (Residents Only) | 2018 | Registry | non-std age groups | NA      | Included |
| Slovakia                   | 1950 | Census   | 5-year age groups  | De jure | Excluded |
| Slovakia                   | 1951 | Registry | 1-year age groups  | NA      | Included |
| Slovakia                   | 1952 | Registry | 1-year age groups  | NA      | Included |
| Slovakia                   | 1953 | Registry | 1-year age groups  | NA      | Included |
| Slovakia                   | 1954 | Registry | 1-year age groups  | NA      | Included |
| Slovakia                   | 1955 | Registry | 1-year age groups  | NA      | Included |
| Slovakia                   | 1956 | Registry | 1-year age groups  | NA      | Included |
| Slovakia                   | 1957 | Registry | 1-year age groups  | NA      | Included |
| Slovakia                   | 1958 | Registry | 1-year age groups  | NA      | Included |
| Slovakia                   | 1959 | Registry | 1-year age groups  | NA      | Included |
| Slovakia                   | 1960 | Registry | 1-year age groups  | NA      | Included |
| Slovakia                   | 1961 | Census   | 1-year age groups  | De jure | Excluded |
| Slovakia                   | 1962 | Registry | 1-year age groups  | NA      | Included |
| Slovakia                   | 1963 | Registry | 1-year age groups  | NA      | Included |
| Slovakia                   | 1964 | Registry | 1-year age groups  | NA      | Included |
| Slovakia                   | 1965 | Registry | 1-year age groups  | NA      | Included |
| Slovakia                   | 1966 | Registry | 1-year age groups  | NA      | Included |
| Slovakia                   | 1967 | Registry | 1-year age groups  | NA      | Included |
| Slovakia                   | 1968 | Registry | 1-year age groups  | NA      | Included |
| Slovakia                   | 1969 | Registry | 1-year age groups  | NA      | Included |
| Slovakia                   | 1970 | Registry | 1-year age groups  | NA      | Included |
| Slovakia                   | 1970 | Census   | all ages only      | Unknown | Excluded |
| Slovakia                   | 1971 | Registry | 1-year age groups  | NA      | Included |
| Slovakia                   | 1972 | Registry | 1-year age groups  | NA      | Included |
| Slovakia                   | 1973 | Registry | 1-year age groups  | NA      | Included |
| Slovakia                   | 1974 | Registry | 1-year age groups  | NA      | Included |
| Slovakia                   | 1975 | Registry | 1-year age groups  | NA      | Included |
| Slovakia                   | 1976 | Registry | 1-year age groups  | NA      | Included |
| Slovakia                   | 1977 | Registry | 1-year age groups  | NA      | Included |
| Slovakia                   | 1978 | Registry | 1-year age groups  | NA      | Included |
| Slovakia                   | 1979 | Registry | 1-year age groups  | NA      | Included |
| Slovakia                   | 1980 | Census   | 5-year age groups  | De jure | Excluded |
| Slovakia                   | 1981 | Registry | 1-year age groups  | NA      | Included |
| Slovakia                   | 1982 | Registry | 1-year age groups  | NA      | Included |
| Slovakia                   | 1983 | Registry | 1-year age groups  | NA      | Included |
| Slovakia                   | 1984 | Registry | 1-year age groups  | NA      | Included |
| Slovakia                   | 1985 | Registry | 1-year age groups  | NA      | Included |
| Slovakia                   | 1986 | Registry | 1-year age groups  | NA      | Included |
| Slovakia                   | 1987 | Registry | 1-year age groups  | NA      | Included |
| Slovakia                   | 1988 | Registry | 1-year age groups  | NA      | Included |
| Slovakia                   | 1989 | Registry | 1-year age groups  | NA      | Included |
| Slovakia                   | 1990 | Registry | 1-year age groups  | NA      | Included |
| Slovakia                   | 1991 | Census   | 5-year age groups  | De jure | Excluded |
| Slovakia                   | 1992 | Registry | 1-year age groups  | NA      | Included |
| Slovakia                   | 1993 | Registry | 1-year age groups  | NA      | Included |
| Slovakia                   | 1994 | Registry | 1-year age groups  | NA      | Included |
| Slovakia                   | 1995 | Registry | 1-year age groups  | NA      | Included |
| Slovakia                   | 1996 | Registry | 1-year age groups  | NA      | Included |

|                 |      |          |                   |          |          |
|-----------------|------|----------|-------------------|----------|----------|
| Slovakia        | 1997 | Registry | 1-year age groups | NA       | Included |
| Slovakia        | 1998 | Registry | 1-year age groups | NA       | Included |
| Slovakia        | 1999 | Registry | 1-year age groups | NA       | Included |
| Slovakia        | 2000 | Registry | 1-year age groups | NA       | Included |
| Slovakia        | 2001 | Census   | 1-year age groups | De jure  | Excluded |
| Slovakia        | 2002 | Registry | 1-year age groups | NA       | Included |
| Slovakia        | 2003 | Registry | 1-year age groups | NA       | Included |
| Slovakia        | 2004 | Registry | 1-year age groups | NA       | Included |
| Slovakia        | 2005 | Registry | 1-year age groups | NA       | Included |
| Slovakia        | 2006 | Registry | 1-year age groups | NA       | Included |
| Slovakia        | 2007 | Registry | 1-year age groups | NA       | Included |
| Slovakia        | 2008 | Registry | 1-year age groups | NA       | Included |
| Slovakia        | 2009 | Registry | 1-year age groups | NA       | Included |
| Slovakia        | 2010 | Registry | 1-year age groups | NA       | Included |
| Slovakia        | 2011 | Census   | 1-year age groups | De jure  | Excluded |
| Slovakia        | 2012 | Registry | 1-year age groups | NA       | Included |
| Slovakia        | 2013 | Registry | 1-year age groups | NA       | Included |
| Slovakia        | 2014 | Registry | 1-year age groups | NA       | Included |
| Slovakia        | 2015 | Registry | 1-year age groups | NA       | Included |
| Slovakia        | 2016 | Registry | 1-year age groups | NA       | Included |
| Slovenia        | 1953 | Census   | all ages only     | Unknown  | Included |
| Slovenia        | 1961 | Census   | all ages only     | Unknown  | Included |
| Slovenia        | 1971 | Census   | 1-year age groups | De facto | Included |
| Slovenia        | 1981 | Census   | all ages only     | Unknown  | Included |
| Slovenia        | 1991 | Census   | 1-year age groups | De jure  | Excluded |
| Slovenia        | 1996 | Registry | 1-year age groups | NA       | Included |
| Slovenia        | 1997 | Registry | 1-year age groups | NA       | Included |
| Slovenia        | 1998 | Registry | 1-year age groups | NA       | Included |
| Slovenia        | 1999 | Registry | 1-year age groups | NA       | Included |
| Slovenia        | 2000 | Registry | 1-year age groups | NA       | Included |
| Slovenia        | 2001 | Registry | 1-year age groups | NA       | Included |
| Slovenia        | 2002 | Census   | 1-year age groups | De jure  | Excluded |
| Slovenia        | 2003 | Registry | 1-year age groups | NA       | Included |
| Slovenia        | 2004 | Registry | 1-year age groups | NA       | Included |
| Slovenia        | 2005 | Registry | 1-year age groups | NA       | Included |
| Slovenia        | 2006 | Registry | 1-year age groups | NA       | Included |
| Slovenia        | 2007 | Registry | 1-year age groups | NA       | Included |
| Slovenia        | 2008 | Registry | 1-year age groups | NA       | Included |
| Slovenia        | 2009 | Registry | 1-year age groups | NA       | Included |
| Slovenia        | 2010 | Registry | 1-year age groups | NA       | Included |
| Slovenia        | 2011 | Census   | 1-year age groups | De jure  | Excluded |
| Slovenia        | 2012 | Registry | 1-year age groups | NA       | Included |
| Slovenia        | 2013 | Registry | 1-year age groups | NA       | Included |
| Slovenia        | 2014 | Registry | 1-year age groups | NA       | Included |
| Slovenia        | 2015 | Census   | 1-year age groups | De jure  | Excluded |
| Slovenia        | 2016 | Registry | 1-year age groups | NA       | Included |
| Slovenia        | 2017 | Registry | 1-year age groups | NA       | Included |
| Solomon Islands | 1959 | Census   | 5-year age groups | De facto | Included |
| Solomon Islands | 1970 | Census   | 5-year age groups | De facto | Included |
| Solomon Islands | 1976 | Census   | 5-year age groups | De facto | Included |
| Solomon Islands | 1986 | Census   | 5-year age groups | De facto | Included |
| Solomon Islands | 1999 | Census   | 5-year age groups | De facto | Included |
| Solomon Islands | 2009 | Census   | 5-year age groups | De facto | Included |
| Somalia         | 1975 | Census   | 5-year age groups | De jure  | Included |
| Somalia         | 1987 | Census   | all ages only     | Unknown  | Included |
| South Africa    | 1951 | Census   | 5-year age groups | De facto | Included |

|              |      |          |                    |          |          |
|--------------|------|----------|--------------------|----------|----------|
| South Africa | 1960 | Census   | 1-year age groups  | De facto | Included |
| South Africa | 1970 | Census   | 1-year age groups  | De facto | Included |
| South Africa | 1980 | Census   | 5-year age groups  | De facto | Excluded |
| South Africa | 1985 | Census   | 1-year age groups  | De facto | Excluded |
| South Africa | 1991 | Census   | 1-year age groups  | De facto | Excluded |
| South Africa | 1996 | Census   | 1-year age groups  | De facto | Included |
| South Africa | 2001 | Census   | 1-year age groups  | De facto | Included |
| South Africa | 2011 | Census   | 1-year age groups  | De facto | Included |
| South Korea  | 1955 | Census   | 5-year age groups  | De facto | Included |
| South Korea  | 1960 | Census   | 5-year age groups  | De facto | Included |
| South Korea  | 1966 | Census   | 1-year age groups  | De facto | Included |
| South Korea  | 1970 | Census   | 1-year age groups  | De facto | Included |
| South Korea  | 1975 | Census   | 5-year age groups  | De facto | Included |
| South Korea  | 1980 | Census   | 1-year age groups  | De facto | Included |
| South Korea  | 1985 | Census   | 1-year age groups  | De facto | Included |
| South Korea  | 1990 | Census   | 1-year age groups  | De facto | Included |
| South Korea  | 1995 | Census   | 1-year age groups  | De jure  | Included |
| South Korea  | 2000 | Census   | 1-year age groups  | De jure  | Included |
| South Korea  | 2005 | Census   | 1-year age groups  | De jure  | Included |
| South Korea  | 2010 | Census   | 5-year age groups  | De jure  | Included |
| South Korea  | 2015 | Census   | 1-year age groups  | De jure  | Included |
| South Korea  | 2020 | Census   | all ages only      | De jure  | Included |
| South Sudan  | 1956 | Census   | non-std age groups | De jure  | Included |
| South Sudan  | 1973 | Census   | 5-year age groups  | De facto | Excluded |
| South Sudan  | 1983 | Census   | all ages only      | De jure  | Included |
| South Sudan  | 2008 | Census   | 1-year age groups  | De facto | Included |
| Spain        | 1950 | Census   | 1-year age groups  | De facto | Included |
| Spain        | 1960 | Census   | 1-year age groups  | De jure  | Included |
| Spain        | 1970 | Census   | 5-year age groups  | De jure  | Included |
| Spain        | 1981 | Census   | 5-year age groups  | De jure  | Included |
| Spain        | 1991 | Census   | 1-year age groups  | De jure  | Included |
| Spain        | 1998 | Registry | 1-year age groups  | NA       | Included |
| Spain        | 1999 | Registry | 1-year age groups  | NA       | Included |
| Spain        | 2000 | Registry | 1-year age groups  | NA       | Included |
| Spain        | 2001 | Census   | 1-year age groups  | De facto | Excluded |
| Spain        | 2002 | Registry | 1-year age groups  | NA       | Included |
| Spain        | 2003 | Registry | 1-year age groups  | NA       | Included |
| Spain        | 2004 | Registry | 1-year age groups  | NA       | Included |
| Spain        | 2005 | Registry | 1-year age groups  | NA       | Included |
| Spain        | 2006 | Registry | 1-year age groups  | NA       | Included |
| Spain        | 2007 | Registry | 1-year age groups  | NA       | Included |
| Spain        | 2008 | Registry | 1-year age groups  | NA       | Included |
| Spain        | 2009 | Registry | 1-year age groups  | NA       | Included |
| Spain        | 2010 | Registry | 1-year age groups  | NA       | Included |
| Spain        | 2011 | Census   | 1-year age groups  | De jure  | Excluded |
| Spain        | 2012 | Registry | 1-year age groups  | NA       | Included |
| Spain        | 2013 | Registry | 1-year age groups  | NA       | Included |
| Spain        | 2014 | Registry | 1-year age groups  | NA       | Included |
| Spain        | 2015 | Registry | 1-year age groups  | NA       | Included |
| Spain        | 2016 | Registry | 1-year age groups  | NA       | Included |
| Sri Lanka    | 1953 | Census   | 5-year age groups  | De facto | Included |
| Sri Lanka    | 1963 | Census   | 1-year age groups  | De facto | Included |
| Sri Lanka    | 1971 | Census   | 1-year age groups  | De facto | Included |
| Sri Lanka    | 1981 | Census   | 1-year age groups  | De facto | Included |
| Sri Lanka    | 2001 | Census   | 1-year age groups  | De facto | Excluded |
| Sri Lanka    | 2012 | Census   | 1-year age groups  | De jure  | Included |

|          |      |          |                    |          |          |
|----------|------|----------|--------------------|----------|----------|
| Sudan    | 1956 | Census   | non-std age groups | De jure  | Included |
| Sudan    | 1973 | Census   | 5-year age groups  | De facto | Included |
| Sudan    | 1983 | Census   | all ages only      | De jure  | Included |
| Sudan    | 1993 | Census   | 5-year age groups  | De jure  | Included |
| Sudan    | 2008 | Census   | 1-year age groups  | Unknown  | Included |
| Suriname | 1950 | Census   | 1-year age groups  | De facto | Included |
| Suriname | 1964 | Census   | 5-year age groups  | De facto | Included |
| Suriname | 1971 | Census   | all ages only      | Unknown  | Included |
| Suriname | 2000 | Census   | all ages only      | Unknown  | Included |
| Suriname | 2003 | Census   | 5-year age groups  | De jure  | Excluded |
| Suriname | 2004 | Census   | 1-year age groups  | De jure  | Included |
| Suriname | 2012 | Census   | 1-year age groups  | De jure  | Included |
| Sweden   | 1950 | Census   | 1-year age groups  | De jure  | Included |
| Sweden   | 1960 | Census   | 5-year age groups  | De jure  | Included |
| Sweden   | 1965 | Census   | 5-year age groups  | De jure  | Included |
| Sweden   | 1968 | Registry | 1-year age groups  | NA       | Included |
| Sweden   | 1969 | Registry | 1-year age groups  | NA       | Included |
| Sweden   | 1970 | Census   | 5-year age groups  | De jure  | Excluded |
| Sweden   | 1971 | Registry | 1-year age groups  | NA       | Included |
| Sweden   | 1972 | Registry | 1-year age groups  | NA       | Included |
| Sweden   | 1973 | Registry | 1-year age groups  | NA       | Included |
| Sweden   | 1974 | Registry | 1-year age groups  | NA       | Included |
| Sweden   | 1975 | Census   | 5-year age groups  | De jure  | Excluded |
| Sweden   | 1976 | Registry | 1-year age groups  | NA       | Included |
| Sweden   | 1977 | Registry | 1-year age groups  | NA       | Included |
| Sweden   | 1978 | Registry | 1-year age groups  | NA       | Included |
| Sweden   | 1979 | Registry | 1-year age groups  | NA       | Included |
| Sweden   | 1980 | Census   | 1-year age groups  | De jure  | Excluded |
| Sweden   | 1981 | Registry | 1-year age groups  | NA       | Included |
| Sweden   | 1982 | Registry | 1-year age groups  | NA       | Included |
| Sweden   | 1983 | Registry | 1-year age groups  | NA       | Included |
| Sweden   | 1984 | Registry | 1-year age groups  | NA       | Included |
| Sweden   | 1985 | Census   | 5-year age groups  | De jure  | Excluded |
| Sweden   | 1986 | Registry | 1-year age groups  | NA       | Included |
| Sweden   | 1987 | Registry | 1-year age groups  | NA       | Included |
| Sweden   | 1988 | Registry | 1-year age groups  | NA       | Included |
| Sweden   | 1989 | Registry | 1-year age groups  | NA       | Included |
| Sweden   | 1990 | Census   | 1-year age groups  | De jure  | Excluded |
| Sweden   | 1991 | Registry | 1-year age groups  | NA       | Included |
| Sweden   | 1992 | Registry | 1-year age groups  | NA       | Included |
| Sweden   | 1993 | Registry | 1-year age groups  | NA       | Included |
| Sweden   | 1994 | Registry | 1-year age groups  | NA       | Included |
| Sweden   | 1995 | Registry | 1-year age groups  | NA       | Included |
| Sweden   | 1996 | Registry | 1-year age groups  | NA       | Included |
| Sweden   | 1997 | Registry | 1-year age groups  | NA       | Included |
| Sweden   | 1998 | Registry | 1-year age groups  | NA       | Included |
| Sweden   | 1999 | Registry | 1-year age groups  | NA       | Included |
| Sweden   | 2000 | Registry | 1-year age groups  | NA       | Included |
| Sweden   | 2001 | Registry | 1-year age groups  | NA       | Included |
| Sweden   | 2002 | Registry | 1-year age groups  | NA       | Included |
| Sweden   | 2003 | Census   | 1-year age groups  | De jure  | Excluded |
| Sweden   | 2004 | Registry | 1-year age groups  | NA       | Included |
| Sweden   | 2005 | Registry | 1-year age groups  | NA       | Included |
| Sweden   | 2006 | Registry | 1-year age groups  | NA       | Included |
| Sweden   | 2007 | Registry | 1-year age groups  | NA       | Included |
| Sweden   | 2008 | Registry | 1-year age groups  | NA       | Included |

|                            |      |          |                   |          |          |
|----------------------------|------|----------|-------------------|----------|----------|
| Sweden                     | 2009 | Registry | 1-year age groups | NA       | Included |
| Sweden                     | 2010 | Registry | 1-year age groups | NA       | Included |
| Sweden                     | 2011 | Census   | 1-year age groups | De jure  | Excluded |
| Sweden                     | 2012 | Registry | 1-year age groups | NA       | Included |
| Sweden                     | 2013 | Registry | 1-year age groups | NA       | Included |
| Sweden                     | 2014 | Registry | 1-year age groups | NA       | Included |
| Sweden                     | 2015 | Registry | 1-year age groups | NA       | Included |
| Sweden                     | 2016 | Registry | 1-year age groups | NA       | Included |
| Switzerland                | 1950 | Census   | 1-year age groups | De jure  | Included |
| Switzerland                | 1960 | Census   | 5-year age groups | De jure  | Included |
| Switzerland                | 1970 | Census   | 1-year age groups | De jure  | Included |
| Switzerland                | 1980 | Census   | 1-year age groups | De jure  | Included |
| Switzerland                | 1990 | Census   | 1-year age groups | De jure  | Included |
| Switzerland                | 2000 | Census   | 5-year age groups | De facto | Included |
| Switzerland                | 2010 | Registry | 1-year age groups | NA       | Included |
| Switzerland                | 2011 | Census   | 1-year age groups | De jure  | Excluded |
| Switzerland                | 2012 | Registry | 1-year age groups | NA       | Included |
| Switzerland                | 2013 | Registry | 1-year age groups | NA       | Included |
| Switzerland                | 2014 | Registry | 1-year age groups | NA       | Included |
| Switzerland                | 2015 | Registry | 1-year age groups | NA       | Included |
| Switzerland                | 2016 | Registry | 1-year age groups | NA       | Included |
| Syria                      | 1960 | Census   | 5-year age groups | De facto | Included |
| Syria                      | 1970 | Census   | 1-year age groups | De facto | Included |
| Syria                      | 1981 | Census   | 1-year age groups | De facto | Included |
| Syria                      | 1994 | Census   | 1-year age groups | De facto | Included |
| Syria                      | 2004 | Census   | 5-year age groups | De facto | Included |
| São Tomé and Príncipe      | 1950 | Census   | all ages only     | Unknown  | Included |
| São Tomé and Príncipe      | 1960 | Census   | 5-year age groups | De jure  | Included |
| São Tomé and Príncipe      | 1970 | Census   | 5-year age groups | De facto | Included |
| São Tomé and Príncipe      | 1981 | Census   | 1-year age groups | De facto | Included |
| São Tomé and Príncipe      | 1991 | Census   | 1-year age groups | De facto | Included |
| São Tomé and Príncipe      | 2001 | Census   | 5-year age groups | De facto | Included |
| São Tomé and Príncipe      | 2012 | Census   | 1-year age groups | De jure  | Included |
| Taiwan (province of China) | 1950 | Registry | 1-year age groups | NA       | Included |
| Taiwan (province of China) | 1951 | Registry | 1-year age groups | NA       | Included |
| Taiwan (province of China) | 1952 | Registry | 1-year age groups | NA       | Included |
| Taiwan (province of China) | 1953 | Registry | 1-year age groups | NA       | Included |
| Taiwan (province of China) | 1954 | Registry | 1-year age groups | NA       | Included |
| Taiwan (province of China) | 1955 | Registry | 1-year age groups | NA       | Included |
| Taiwan (province of China) | 1956 | Census   | 5-year age groups | De facto | Excluded |
| Taiwan (province of China) | 1957 | Registry | 1-year age groups | NA       | Included |
| Taiwan (province of China) | 1958 | Registry | 1-year age groups | NA       | Included |
| Taiwan (province of China) | 1959 | Registry | 1-year age groups | NA       | Included |
| Taiwan (province of China) | 1960 | Registry | 1-year age groups | NA       | Included |
| Taiwan (province of China) | 1961 | Registry | 1-year age groups | NA       | Included |
| Taiwan (province of China) | 1962 | Registry | 1-year age groups | NA       | Included |
| Taiwan (province of China) | 1963 | Registry | 1-year age groups | NA       | Included |
| Taiwan (province of China) | 1964 | Registry | 1-year age groups | NA       | Included |
| Taiwan (province of China) | 1965 | Registry | 5-year age groups | NA       | Included |
| Taiwan (province of China) | 1966 | Registry | 5-year age groups | NA       | Included |
| Taiwan (province of China) | 1967 | Registry | 5-year age groups | NA       | Included |
| Taiwan (province of China) | 1968 | Registry | 5-year age groups | NA       | Included |
| Taiwan (province of China) | 1969 | Registry | 5-year age groups | NA       | Included |
| Taiwan (province of China) | 1970 | Registry | 1-year age groups | NA       | Included |
| Taiwan (province of China) | 1971 | Census   | 5-year age groups | De jure  | Excluded |
| Taiwan (province of China) | 1972 | Registry | 1-year age groups | NA       | Included |





|                     |      |        |                    |          |          |
|---------------------|------|--------|--------------------|----------|----------|
| Tanzania            | 2012 | Census | 1-year age groups  | De facto | Included |
| Thailand            | 1956 | Census | 5-year age groups  | De jure  | Excluded |
| Thailand            | 1960 | Census | 5-year age groups  | De jure  | Included |
| Thailand            | 1970 | Census | 5-year age groups  | De jure  | Included |
| Thailand            | 1980 | Census | 1-year age groups  | De jure  | Included |
| Thailand            | 1990 | Census | 5-year age groups  | De jure  | Included |
| Thailand            | 2000 | Census | 1-year age groups  | De jure  | Included |
| Thailand            | 2010 | Census | 1-year age groups  | De jure  | Included |
| The Bahamas         | 1953 | Census | 5-year age groups  | De facto | Included |
| The Bahamas         | 1963 | Census | non-std age groups | De facto | Included |
| The Bahamas         | 1970 | Census | 1-year age groups  | De facto | Included |
| The Bahamas         | 1980 | Census | 1-year age groups  | De facto | Included |
| The Bahamas         | 1990 | Census | 1-year age groups  | De facto | Included |
| The Bahamas         | 2000 | Census | 1-year age groups  | De facto | Included |
| The Bahamas         | 2010 | Census | 1-year age groups  | De jure  | Included |
| The Gambia          | 1963 | Census | non-std age groups | De facto | Included |
| The Gambia          | 1973 | Census | 1-year age groups  | De facto | Included |
| The Gambia          | 1983 | Census | 1-year age groups  | De facto | Included |
| The Gambia          | 1993 | Census | 1-year age groups  | De facto | Included |
| The Gambia          | 2003 | Census | 5-year age groups  | De facto | Included |
| The Gambia          | 2013 | Census | 5-year age groups  | De facto | Included |
| Timor-Leste         | 1950 | Census | all ages only      | Unknown  | Included |
| Timor-Leste         | 1960 | Census | all ages only      | Unknown  | Included |
| Timor-Leste         | 1980 | Census | all ages only      | Unknown  | Included |
| Timor-Leste         | 1990 | Census | 1-year age groups  | De jure  | Included |
| Timor-Leste         | 2004 | Census | 5-year age groups  | De facto | Included |
| Timor-Leste         | 2010 | Census | 1-year age groups  | De facto | Included |
| Timor-Leste         | 2015 | Census | 5-year age groups  | De facto | Included |
| Togo                | 1958 | Census | 1-year age groups  | De facto | Included |
| Togo                | 1970 | Census | 5-year age groups  | De jure  | Included |
| Togo                | 1981 | Census | 5-year age groups  | De facto | Included |
| Togo                | 2010 | Census | 5-year age groups  | De jure  | Included |
| Tokelau             | 1951 | Census | 5-year age groups  | De facto | Excluded |
| Tokelau             | 1956 | Census | 1-year age groups  | De facto | Included |
| Tokelau             | 1961 | Census | 5-year age groups  | Unknown  | Included |
| Tokelau             | 1966 | Census | 5-year age groups  | Unknown  | Included |
| Tokelau             | 1972 | Census | 5-year age groups  | Unknown  | Included |
| Tokelau             | 1976 | Census | 5-year age groups  | De facto | Excluded |
| Tokelau             | 1981 | Census | 1-year age groups  | Unknown  | Included |
| Tokelau             | 1986 | Census | 5-year age groups  | Unknown  | Included |
| Tokelau             | 1991 | Census | 5-year age groups  | De facto | Included |
| Tokelau             | 1996 | Census | 5-year age groups  | De facto | Included |
| Tokelau             | 2001 | Census | 5-year age groups  | De facto | Included |
| Tokelau             | 2006 | Census | 5-year age groups  | De facto | Included |
| Tokelau             | 2011 | Census | 5-year age groups  | De facto | Included |
| Tokelau             | 2016 | Census | 5-year age groups  | De facto | Included |
| Tonga               | 1956 | Census | 5-year age groups  | De facto | Included |
| Tonga               | 1966 | Census | 5-year age groups  | De facto | Included |
| Tonga               | 1976 | Census | 5-year age groups  | De jure  | Included |
| Tonga               | 1986 | Census | 5-year age groups  | De facto | Included |
| Tonga               | 1996 | Census | 5-year age groups  | De facto | Included |
| Tonga               | 2006 | Census | 1-year age groups  | De jure  | Included |
| Tonga               | 2011 | Census | non-std age groups | De jure  | Included |
| Tonga               | 2016 | Census | 1-year age groups  | De facto | Included |
| Trinidad and Tobago | 1960 | Census | 1-year age groups  | De jure  | Included |
| Trinidad and Tobago | 1970 | Census | 1-year age groups  | De facto | Included |

|                     |      |          |                    |          |          |
|---------------------|------|----------|--------------------|----------|----------|
| Trinidad and Tobago | 1980 | Census   | 1-year age groups  | De facto | Included |
| Trinidad and Tobago | 1990 | Census   | 5-year age groups  | De facto | Included |
| Trinidad and Tobago | 2000 | Census   | 5-year age groups  | De facto | Included |
| Trinidad and Tobago | 2011 | Census   | 1-year age groups  | De jure  | Included |
| Tunisia             | 1956 | Census   | non-std age groups | De facto | Included |
| Tunisia             | 1966 | Census   | 1-year age groups  | De facto | Included |
| Tunisia             | 1975 | Census   | 5-year age groups  | De facto | Included |
| Tunisia             | 1984 | Census   | 1-year age groups  | De facto | Included |
| Tunisia             | 1994 | Census   | 1-year age groups  | De facto | Included |
| Tunisia             | 2004 | Census   | 5-year age groups  | De facto | Included |
| Tunisia             | 2014 | Census   | 5-year age groups  | De facto | Included |
| Turkmenistan        | 1959 | Census   | non-std age groups | De facto | Included |
| Turkmenistan        | 1970 | Census   | non-std age groups | De facto | Included |
| Turkmenistan        | 1979 | Census   | 5-year age groups  | De facto | Included |
| Turkmenistan        | 1989 | Census   | 5-year age groups  | De facto | Included |
| Turkmenistan        | 1995 | Census   | 5-year age groups  | De facto | Excluded |
| Turkmenistan        | 2015 | Census   | all ages only      | Unknown  | Included |
| Tuvalu              | 1963 | Census   | 5-year age groups  | De facto | Included |
| Tuvalu              | 1968 | Census   | 5-year age groups  | De facto | Excluded |
| Tuvalu              | 1973 | Census   | 5-year age groups  | De facto | Included |
| Tuvalu              | 1979 | Census   | 5-year age groups  | De facto | Included |
| Tuvalu              | 1991 | Census   | 5-year age groups  | De facto | Included |
| Tuvalu              | 2002 | Census   | 5-year age groups  | De facto | Included |
| Tuvalu              | 2012 | Census   | 5-year age groups  | De facto | Included |
| Türkiye             | 1950 | Census   | 5-year age groups  | De facto | Included |
| Türkiye             | 1955 | Census   | 5-year age groups  | De facto | Included |
| Türkiye             | 1960 | Census   | 5-year age groups  | De facto | Included |
| Türkiye             | 1965 | Census   | 5-year age groups  | De facto | Included |
| Türkiye             | 1970 | Census   | 5-year age groups  | De facto | Excluded |
| Türkiye             | 1975 | Census   | 5-year age groups  | De facto | Included |
| Türkiye             | 1980 | Census   | 5-year age groups  | De facto | Included |
| Türkiye             | 1985 | Census   | 5-year age groups  | De facto | Excluded |
| Türkiye             | 1990 | Census   | 5-year age groups  | De facto | Excluded |
| Türkiye             | 2000 | Census   | 5-year age groups  | De facto | Excluded |
| Türkiye             | 2007 | Registry | 5-year age groups  | NA       | Excluded |
| Türkiye             | 2008 | Registry | 5-year age groups  | NA       | Excluded |
| Türkiye             | 2009 | Registry | 5-year age groups  | NA       | Excluded |
| Türkiye             | 2010 | Registry | 5-year age groups  | NA       | Excluded |
| Türkiye             | 2011 | Registry | 5-year age groups  | NA       | Excluded |
| Türkiye             | 2012 | Registry | 5-year age groups  | NA       | Excluded |
| Türkiye             | 2013 | Registry | 5-year age groups  | NA       | Excluded |
| Türkiye             | 2014 | Registry | 5-year age groups  | NA       | Excluded |
| Türkiye             | 2015 | Registry | 5-year age groups  | NA       | Excluded |
| Türkiye             | 2016 | Registry | 5-year age groups  | NA       | Excluded |
| Türkiye             | 2017 | Registry | 5-year age groups  | NA       | Excluded |
| Türkiye             | 2018 | Registry | 5-year age groups  | NA       | Included |
| Türkiye             | 2019 | Registry | 5-year age groups  | NA       | Included |
| Türkiye             | 2020 | Census   | 5-year age groups  | De jure  | Included |
| UK                  | 1991 | Census   | 1-year age groups  | De facto | Excluded |
| UK                  | 2001 | Census   | 1-year age groups  | De facto | Included |
| UK                  | 2011 | Census   | 1-year age groups  | De jure  | Included |
| United States       | 1950 | Census   | 1-year age groups  | De jure  | Included |
| United States       | 1960 | Census   | 5-year age groups  | De jure  | Excluded |
| United States       | 1970 | Census   | 5-year age groups  | De jure  | Included |
| United States       | 1980 | Census   | 5-year age groups  | De jure  | Included |
| United States       | 1990 | Census   | 5-year age groups  | De jure  | Included |

|                      |      |        |                    |          |          |
|----------------------|------|--------|--------------------|----------|----------|
| United States        | 2000 | Census | 5-year age groups  | De jure  | Included |
| United States        | 2010 | Census | 5-year age groups  | De jure  | Included |
| United States        | 2020 | Census | all ages only      | De jure  | Included |
| Uganda               | 1959 | Census | 5-year age groups  | De jure  | Included |
| Uganda               | 1969 | Census | 1-year age groups  | De facto | Included |
| Uganda               | 1980 | Census | 5-year age groups  | De facto | Excluded |
| Uganda               | 1991 | Census | 1-year age groups  | De facto | Included |
| Uganda               | 2002 | Census | 1-year age groups  | De facto | Included |
| Uganda               | 2014 | Census | 1-year age groups  | De facto | Included |
| Ukraine              | 1959 | Census | non-std age groups | De facto | Included |
| Ukraine              | 1970 | Census | non-std age groups | De facto | Included |
| Ukraine              | 1979 | Census | 5-year age groups  | De facto | Included |
| Ukraine              | 1989 | Census | 5-year age groups  | De jure  | Included |
| Ukraine              | 2001 | Census | 1-year age groups  | De facto | Included |
| United Arab Emirates | 1968 | Census | non-std age groups | De facto | Included |
| United Arab Emirates | 1975 | Census | 5-year age groups  | De facto | Included |
| United Arab Emirates | 1980 | Census | 5-year age groups  | De jure  | Included |
| United Arab Emirates | 1985 | Census | 5-year age groups  | De facto | Included |
| United Arab Emirates | 1995 | Census | 5-year age groups  | De facto | Included |
| United Arab Emirates | 2005 | Census | 5-year age groups  | De facto | Included |
| Uruguay              | 1963 | Census | 1-year age groups  | De facto | Included |
| Uruguay              | 1975 | Census | 5-year age groups  | De facto | Included |
| Uruguay              | 1985 | Census | 1-year age groups  | De facto | Included |
| Uruguay              | 1996 | Census | 1-year age groups  | De facto | Included |
| Uruguay              | 2004 | Census | 1-year age groups  | De facto | Included |
| Uruguay              | 2011 | Census | 1-year age groups  | De jure  | Included |
| Uzbekistan           | 1959 | Census | non-std age groups | De facto | Included |
| Uzbekistan           | 1970 | Census | non-std age groups | De facto | Included |
| Uzbekistan           | 1979 | Census | 5-year age groups  | De facto | Included |
| Uzbekistan           | 1989 | Census | 5-year age groups  | De jure  | Included |
| Vanuatu              | 1967 | Census | 5-year age groups  | De facto | Included |
| Vanuatu              | 1979 | Census | 5-year age groups  | De facto | Included |
| Vanuatu              | 1989 | Census | 1-year age groups  | De jure  | Included |
| Vanuatu              | 1999 | Census | 5-year age groups  | De facto | Included |
| Vanuatu              | 2009 | Census | 1-year age groups  | De facto | Included |
| Vanuatu              | 2016 | Census | 5-year age groups  | De facto | Excluded |
| Vanuatu              | 2020 | Census | 5-year age groups  | De facto | Included |
| Venezuela            | 1950 | Census | 1-year age groups  | De facto | Included |
| Venezuela            | 1961 | Census | 1-year age groups  | De facto | Included |
| Venezuela            | 1971 | Census | 5-year age groups  | De facto | Included |
| Venezuela            | 1981 | Census | 1-year age groups  | De facto | Included |
| Venezuela            | 1990 | Census | 1-year age groups  | De facto | Included |
| Venezuela            | 2001 | Census | non-std age groups | De facto | Included |
| Venezuela            | 2011 | Census | 1-year age groups  | De jure  | Included |
| Viet Nam             | 1979 | Census | 5-year age groups  | De facto | Included |
| Viet Nam             | 1989 | Census | 1-year age groups  | De jure  | Included |
| Viet Nam             | 1999 | Census | 1-year age groups  | De jure  | Included |
| Viet Nam             | 2009 | Census | 1-year age groups  | De jure  | Included |
| Viet Nam             | 2019 | Census | 5-year age groups  | De jure  | Included |
| Virgin Islands, U.S. | 1950 | Census | 5-year age groups  | De jure  | Included |
| Virgin Islands, U.S. | 1960 | Census | 5-year age groups  | De jure  | Included |
| Virgin Islands, U.S. | 1970 | Census | 5-year age groups  | De jure  | Included |
| Virgin Islands, U.S. | 1980 | Census | 1-year age groups  | De jure  | Included |
| Virgin Islands, U.S. | 1990 | Census | 5-year age groups  | De jure  | Included |
| Virgin Islands, U.S. | 2000 | Census | 5-year age groups  | De jure  | Included |
| Virgin Islands, U.S. | 2010 | Census | 5-year age groups  | De jure  | Included |

|                      |      |        |                    |          |          |
|----------------------|------|--------|--------------------|----------|----------|
| Virgin Islands, U.S. | 2020 | Census | 5-year age groups  | De jure  | Included |
| Yemen                | 1994 | Census | 1-year age groups  | De facto | Included |
| Yemen                | 2004 | Census | 5-year age groups  | De facto | Included |
| Zambia               | 1969 | Census | 1-year age groups  | De facto | Included |
| Zambia               | 1980 | Census | 1-year age groups  | De facto | Included |
| Zambia               | 1990 | Census | 1-year age groups  | De facto | Included |
| Zambia               | 2000 | Census | 1-year age groups  | De facto | Included |
| Zambia               | 2010 | Census | 1-year age groups  | De jure  | Included |
| Zimbabwe             | 1962 | Census | non-std age groups | De jure  | Excluded |
| Zimbabwe             | 1982 | Census | 1-year age groups  | De facto | Included |
| Zimbabwe             | 1992 | Census | 1-year age groups  | De facto | Included |
| Zimbabwe             | 2002 | Census | 1-year age groups  | De facto | Included |
| Zimbabwe             | 2012 | Census | 1-year age groups  | De facto | Included |

**Appendix Table S14: GBD world population age standard**

| <b>Age Group</b> | <b>Percent of Population</b> | <b>Rounded</b> |
|------------------|------------------------------|----------------|
| Early Neonatal   | 0.0396232                    | 0.04           |
| Late Neonatal    | 0.117777                     | 0.12           |
| 1 to 5 months    | 0.864776                     | 0.86           |
| 6 to 11 months   | 1.01009                      | 1.01           |
| 12 to 23 months  | 2.01613                      | 2.02           |
| 2 to 4           | 5.9934                       | 5.99           |
| 5 to 9           | 9.65824                      | 9.66           |
| 10 to 14         | 8.99361                      | 8.99           |
| 15 to 19         | 8.28913                      | 8.29           |
| 20 to 24         | 7.80122                      | 7.8            |
| 25 to 29         | 7.59144                      | 7.59           |
| 30 to 34         | 7.32171                      | 7.32           |
| 35 to 39         | 6.82805                      | 6.83           |
| 40 to 44         | 6.14735                      | 6.15           |
| 45 to 49         | 5.51133                      | 5.51           |
| 50 to 54         | 4.91312                      | 4.91           |
| 55 to 59         | 4.34586                      | 4.35           |
| 60 to 64         | 3.68223                      | 3.68           |
| 65 to 69         | 2.98509                      | 2.99           |
| 70 to 74         | 2.26526                      | 2.27           |
| 75 to 79         | 1.59758                      | 1.6            |
| 80 to 84         | 1.09729                      | 1.1            |
| 85 to 89         | 0.604519                     | 0.6            |
| 90 to 94         | 0.246663                     | 0.25           |
| 95 plus          | 0.0785092                    | 0.08           |

Appendix Table S15: Socio-demographic Index values for all estimated GBD 2021 locations, 1950-1974

| Location                                         | 1950        | 1951        | 1952        | 1953        | 1954        | 1955        | 1956        | 1957        | 1958         | 1959        | 1960        | 1961         | 1962        | 1963        | 1964        | 1965         | 1966        | 1967        | 1968        | 1969        | 1970        | 1971        | 1972        | 1973        | 1974        |
|--------------------------------------------------|-------------|-------------|-------------|-------------|-------------|-------------|-------------|-------------|--------------|-------------|-------------|--------------|-------------|-------------|-------------|--------------|-------------|-------------|-------------|-------------|-------------|-------------|-------------|-------------|-------------|
| Global                                           | 0.369234923 | 0.37169409  | 0.37402483  | 0.37618715  | 0.37817234  | 0.37988415  | 0.38201193  | 0.38428664  | 0.38664414   | 0.38915628  | 0.39181334  | 0.39462388   | 0.40073251  | 0.40416286  | 0.40869984  | 0.41266934   | 0.41638035  | 0.42052189  | 0.42521196  | 0.43110519  | 0.43729472  | 0.44382646  | 0.44879233  | 0.45420036  | 0.46012467  |
| Central Europe, eastern Europe, and central Asia | 0.525915472 | 0.52885856  | 0.53114928  | 0.53359107  | 0.53647564  | 0.53861176  | 0.53994680  | 0.5410634   | 0.543174716  | 0.54604061  | 0.55050122  | 0.55665183   | 0.5636164   | 0.56928635  | 0.5746996   | 0.57781188   | 0.57863446  | 0.579536026 | 0.58119168  | 0.584656841 | 0.588059114 | 0.591172863 | 0.59524884  | 0.59822286  | 0.60064055  |
| Central Asia                                     | 0.432762555 | 0.434969133 | 0.43824697  | 0.44078989  | 0.44262282  | 0.444127416 | 0.44651653  | 0.44853582  | 0.450660084  | 0.45217908  | 0.455129108 | 0.45965344   | 0.465536402 | 0.471220117 | 0.476829292 | 0.48173133   | 0.486650363 | 0.49206251  | 0.498173404 | 0.50478215  | 0.510685364 | 0.516649881 | 0.521762948 | 0.527119665 | 0.532490574 |
| Armenia                                          | 0.455517664 | 0.454023955 | 0.45565447  | 0.45718278  | 0.45842276  | 0.460100183 | 0.462512029 | 0.464007925 | 0.466417405  | 0.468904764 | 0.47148776  | 0.47465006   | 0.478426063 | 0.4831297   | 0.487429882 | 0.50033674   | 0.506092577 | 0.511813766 | 0.517318684 | 0.522310704 | 0.527273689 | 0.531845528 | 0.535808199 | 0.539804896 | 0.54352901  |
| Azerbaijan                                       | 0.412950445 | 0.414169179 | 0.417118485 | 0.419283938 | 0.42098668  | 0.423370706 | 0.425858025 | 0.429031213 | 0.432101794  | 0.434289802 | 0.438192535 | 0.442484643  | 0.446645651 | 0.450119449 | 0.453707366 | 0.462570694  | 0.470052564 | 0.478330886 | 0.487308757 | 0.496842875 | 0.506922475 | 0.515517884 | 0.524952224 | 0.534980795 | 0.544497673 |
| Georgia                                          | 0.552054833 | 0.554598585 | 0.558398407 | 0.562153597 | 0.567247001 | 0.569878222 | 0.572492923 | 0.574974936 | 0.580011634  | 0.581209704 | 0.58301829  | 0.586168613  | 0.589752316 | 0.593117517 | 0.597335693 | 0.601708843  | 0.606084942 | 0.610476073 | 0.614713091 | 0.618707118 | 0.6204636   | 0.619369683 | 0.616471656 | 0.611318148 | 0.61617891  |
| Kazakhstan                                       | 0.447574251 | 0.450007769 | 0.454095151 | 0.458380413 | 0.46491441  | 0.4578201   | 0.45391305  | 0.458358582 | 0.454136398  | 0.453408228 | 0.455273713 | 0.461774399  | 0.472008843 | 0.485299147 | 0.495478854 | 0.502732175  | 0.509366077 | 0.516094257 | 0.522777008 | 0.529353024 | 0.537192102 | 0.545594517 | 0.552005552 | 0.559061329 | 0.564585103 |
| Kyrgyzstan                                       | 0.438539858 | 0.441493558 | 0.444678606 | 0.447573712 | 0.450393855 | 0.453243903 | 0.456046238 | 0.458698898 | 0.461043954  | 0.462941257 | 0.46544528  | 0.468671133  | 0.473045311 | 0.477517165 | 0.482558553 | 0.487881186  | 0.493170774 | 0.498794411 | 0.504638791 | 0.507294294 | 0.507725207 | 0.499048045 | 0.485013765 | 0.483971538 | 0.487288704 |
| Mongolia                                         | 0.30923411  | 0.308394264 | 0.311112812 | 0.313947803 | 0.316640959 | 0.318702028 | 0.32034839  | 0.321400355 | 0.322520867  | 0.323639352 | 0.325291292 | 0.326921851  | 0.328609974 | 0.330153389 | 0.331588039 | 0.333008418  | 0.334656956 | 0.336249121 | 0.338093904 | 0.340534368 | 0.343946515 | 0.348139519 | 0.353248099 | 0.359112611 | 0.365332168 |
| Tajikistan                                       | 0.314899706 | 0.316571192 | 0.319118283 | 0.321761045 | 0.324504116 | 0.327225955 | 0.331241427 | 0.334783941 | 0.338505296  | 0.341807774 | 0.345633665 | 0.34952637   | 0.353616498 | 0.357822466 | 0.361327414 | 0.365144046  | 0.370039981 | 0.37462681  | 0.379309802 | 0.383751326 | 0.38836781  | 0.392899959 | 0.397344198 | 0.4020119   | 0.406556299 |
| Turkmenistan                                     | 0.42197224  | 0.426215254 | 0.42994985  | 0.432675159 | 0.435659073 | 0.438622573 | 0.44122337  | 0.443578863 | 0.4451509673 | 0.44727976  | 0.45157084  | 0.46185661   | 0.46751436  | 0.473881075 | 0.482552163 | 0.492770673  | 0.485732055 | 0.488878889 | 0.492880811 | 0.4965262   | 0.499921512 | 0.502635658 | 0.50460986  | 0.5103848   |             |
| Uzbekistan                                       | 0.371074328 | 0.373486522 | 0.376658285 | 0.379975515 | 0.383334853 | 0.387130304 | 0.391294738 | 0.395265266 | 0.399580308  | 0.403441682 | 0.40789952  | 0.412437265  | 0.416831727 | 0.420766368 | 0.425232729 | 0.429924565  | 0.434734471 | 0.439377746 | 0.444022423 | 0.448325491 | 0.452575107 | 0.457017474 | 0.461187121 | 0.465499361 | 0.469515559 |
| Central Europe                                   | 0.482313114 | 0.486887283 | 0.489996888 | 0.49132428  | 0.490223208 | 0.494557281 | 0.497155374 | 0.500758051 | 0.50465848   | 0.509140151 | 0.51444040  | 0.520330368  | 0.525782513 | 0.531012003 | 0.536460959 | 0.542179864  | 0.548119272 | 0.554315756 | 0.547498133 | 0.553482929 | 0.559865662 | 0.565637099 | 0.567186407 | 0.568918381 | 0.570870821 |
| Albania                                          | 0.349281637 | 0.351958678 | 0.355129027 | 0.358407423 | 0.362948293 | 0.367283957 | 0.372039077 | 0.376205073 | 0.380250073  | 0.384031771 | 0.387047181 | 0.3917554001 | 0.38122266  | 0.3877382   | 0.394661039 | 0.401672409  | 0.408602746 | 0.415264551 | 0.422203304 | 0.429837359 | 0.4380956   | 0.447022444 | 0.456676603 | 0.466873486 | 0.471177386 |
| Bosnia and Herzegovina                           | 0.29246174  | 0.297179584 | 0.301110994 | 0.30418396  | 0.306774156 | 0.312766498 | 0.315680863 | 0.320661284 | 0.325803518  | 0.329829297 | 0.340796093 | 0.348131402  | 0.355004931 | 0.36278687  | 0.37117366  | 0.379325754  | 0.387095775 | 0.39560345  | 0.403417926 | 0.41154723  | 0.419486464 | 0.4273884   | 0.434834803 | 0.441608965 | 0.448371737 |
| Bulgaria                                         | 0.462106505 | 0.47004104  | 0.478951484 | 0.483296316 | 0.484631708 | 0.485567314 | 0.486774015 | 0.489483473 | 0.49128079   | 0.49670949  | 0.50192275  | 0.50485266   | 0.51225365  | 0.52291397  | 0.534797612 | 0.54825516   | 0.552025016 | 0.557283606 | 0.561767976 | 0.56734707  | 0.57130276  | 0.574433143 | 0.579190601 | 0.586082903 | 0.593926669 |
| Croatia                                          | 0.471246319 | 0.478883509 | 0.482723844 | 0.480705665 | 0.48436522  | 0.489177721 | 0.495553944 | 0.50048341  | 0.511320399  | 0.51744793  | 0.524389986 | 0.531446613  | 0.538323721 | 0.544422998 | 0.547224554 | 0.548087423  | 0.552025016 | 0.557283606 | 0.561767976 | 0.56734707  | 0.57130276  | 0.574433143 | 0.579190601 | 0.586082903 | 0.593926669 |
| Czechia                                          | 0.572979218 | 0.576308858 | 0.580081049 | 0.58460615  | 0.58690789  | 0.58784148  | 0.589517857 | 0.591370789 | 0.598874002  | 0.60222774  | 0.605152705 | 0.603122545  | 0.60916114  | 0.600518075 | 0.606224163 | 0.6141459905 | 0.622782257 | 0.628398351 | 0.631226934 | 0.632647492 | 0.633842015 | 0.632567254 | 0.627373991 | 0.620422512 | 0.617208623 |
| Hungary                                          | 0.502327291 | 0.50667361  | 0.507027404 | 0.504027896 | 0.501293252 | 0.507380053 | 0.513064642 | 0.51971855  | 0.525851828  | 0.531788688 | 0.538128236 | 0.545608289  | 0.552650569 | 0.557558844 | 0.560862544 | 0.561733688  | 0.5609632   | 0.560878189 | 0.563412027 | 0.568071035 | 0.572409361 | 0.575679006 | 0.576402922 | 0.5723433   | 0.576928658 |
| Montenegro                                       | 0.45701218  | 0.461607408 | 0.464652109 | 0.46931829  | 0.47335474  | 0.481914442 | 0.48851574  | 0.495948747 | 0.502369645  | 0.508763705 | 0.515805554 | 0.524374787  | 0.531427404 | 0.539084803 | 0.547179118 | 0.555834395  | 0.559922345 | 0.565458186 | 0.571106307 | 0.576041212 | 0.581342194 | 0.58849095  | 0.594661823 | 0.600714409 | 0.605562998 |
| North Macedonia                                  | 0.412074488 | 0.415949627 | 0.417961991 | 0.42376017  | 0.428318203 | 0.433818203 | 0.439270033 | 0.445503366 | 0.452700733  | 0.458302113 | 0.464231513 | 0.470431778  | 0.476912546 | 0.483513748 | 0.49021337  | 0.500631603  | 0.514581918 | 0.521134633 | 0.527997064 | 0.534279964 | 0.541273388 | 0.548643357 | 0.556297906 | 0.56449337  | 0.570599894 |
| Poland                                           | 0.494196325 | 0.495773827 | 0.496412027 | 0.496378253 | 0.495421118 | 0.495041072 | 0.494964558 | 0.491911018 | 0.499650596  | 0.505959452 | 0.511548332 | 0.520726972  | 0.526866994 | 0.533448791 | 0.540290603 | 0.547661619  | 0.555642526 | 0.562609102 | 0.566717772 | 0.569431353 | 0.57147282  | 0.575098522 | 0.579780239 | 0.583539281 | 0.586629929 |
| Romania                                          | 0.40122554  | 0.414242296 | 0.420756634 | 0.426313273 | 0.42907661  | 0.434674719 | 0.437918347 | 0.44362052  | 0.447092862  | 0.453438308 | 0.460748641 | 0.468431628  | 0.475637935 | 0.482748653 | 0.489765496 | 0.49991357   | 0.473768829 | 0.457287519 | 0.463306128 | 0.480115059 | 0.495570931 | 0.509336073 | 0.514283104 | 0.516881202 | 0.51867515  |
| Serbia                                           | 0.471735674 | 0.481182519 | 0.484454318 | 0.486847063 | 0.490409227 | 0.497607451 | 0.50460705  | 0.508386378 | 0.508984502  | 0.508242168 | 0.508019288 | 0.510192878  | 0.513046885 | 0.517960338 | 0.517179272 | 0.52033671   | 0.525871389 | 0.531166098 | 0.536424338 | 0.54308292  | 0.54895365  | 0.552875477 | 0.556872783 | 0.56088327  | 0.56389441  |
| Slovakia                                         | 0.527648823 | 0.526183112 | 0.5306769   | 0.534787576 | 0.53622914  | 0.535869195 | 0.536651652 | 0.540662154 | 0.544670271  | 0.54684248  | 0.544913095 | 0.54687851   | 0.550090654 | 0.56292751  | 0.56952527  | 0.576740167  | 0.584688555 | 0.591905578 | 0.59513095  | 0.597639928 | 0.601619653 | 0.603826904 | 0.603658007 | 0.602267377 | 0.603145751 |
| Slovenia                                         | 0.59861423  | 0.54426972  | 0.568758718 | 0.572964426 | 0.576474793 | 0.579989761 | 0.583847292 | 0.589905516 | 0.595158107  | 0.598251888 | 0.601154973 | 0.603179174  | 0.60542648  | 0.6083404   | 0.609301093 | 0.610465146  | 0.61281076  | 0.615023208 | 0.62472027  | 0.63053467  | 0.631721905 | 0.6343369   | 0.637605107 | 0.641929302 | 0.645554247 |
| Eastern Europe                                   | 0.554107568 | 0.557231216 | 0.562886322 | 0.566325045 | 0.569795828 | 0.571629398 | 0.571540436 | 0.571629398 | 0.574277754  | 0.575436692 | 0.576439193 | 0.58710374   | 0.595426663 | 0.602283939 | 0.608647381 | 0.612014304  | 0.613218197 | 0.613857201 | 0.613986181 | 0.616819808 | 0.615066505 | 0.618462919 | 0.622883568 | 0.627021555 | 0.63018609  |
| Belarus                                          | 0.480655583 | 0.486253222 | 0.49503231  | 0.500825581 | 0.502920251 | 0.503061562 | 0.508478423 | 0.51104427  | 0.513639638  | 0.517664987 | 0.523121884 | 0.529781801  | 0.536697967 | 0.542102957 | 0.547617643 | 0.55083451   | 0.551379973 | 0           |             |             |             |             |             |             |             |

|                           |             |             |             |             |             |             |             |             |             |             |             |             |             |             |             |             |             |             |             |             |             |             |             |             |             |
|---------------------------|-------------|-------------|-------------|-------------|-------------|-------------|-------------|-------------|-------------|-------------|-------------|-------------|-------------|-------------|-------------|-------------|-------------|-------------|-------------|-------------|-------------|-------------|-------------|-------------|-------------|
|                           | 5.5250777   | 0.5673059   | 0.572414239 | 0.57975914  | 0.58545764  | 0.591346758 | 0.597076327 | 0.601542943 | 0.605234632 | 0.61021397  | 0.616520247 | 0.623221949 | 0.629670624 | 0.63537769  | 0.640152428 | 0.646822564 | 0.655461453 | 0.66193599  | 0.67228168  | 0.680220657 | 0.684636999 | 0.689055130 | 0.690691690 | 0.69519035  | 0.701478624 |
| Niigata                   | 5.1030715   | 0.52108583  | 0.52946128  | 0.537282424 | 0.54525488  | 0.548610721 | 0.555134039 | 0.55989867  | 0.56289922  | 0.567929655 | 0.574607711 | 0.581180542 | 0.588017615 | 0.59407111  | 0.598716285 | 0.60768321  | 0.614952584 | 0.62064035  | 0.63123685  | 0.638965487 | 0.642675272 | 0.644316923 | 0.647751477 | 0.651194826 | 0.661382504 |
| Oita                      | 5.1897794   | 0.52993261  | 0.53893256  | 0.54648886  | 0.55230847  | 0.558194893 | 0.563918528 | 0.568448002 | 0.572215638 | 0.577449114 | 0.58368827  | 0.589653624 | 0.595735416 | 0.600771087 | 0.604823784 | 0.613203221 | 0.620252532 | 0.626286683 | 0.636776802 | 0.642524517 | 0.649959538 | 0.652674157 | 0.657130712 | 0.663395987 | 0.671223674 |
| Okayama                   | 5.5276327   | 0.53181605  | 0.547457276 | 0.55523967  | 0.561114187 | 0.566987087 | 0.573630519 | 0.57722588  | 0.580083018 | 0.585017976 | 0.591266739 | 0.599727407 | 0.607226166 | 0.613699962 | 0.618668016 | 0.628071696 | 0.63603832  | 0.642577855 | 0.654057031 | 0.66424487  | 0.6690797   | 0.679033353 | 0.674451542 | 0.679920917 | 0.684753759 |
| Okawa                     | 0.45527213  | 0.49054901  | 0.480055493 | 0.490262813 | 0.497234931 | 0.504119407 | 0.511629127 | 0.516414458 | 0.519594144 | 0.525194005 | 0.532786427 | 0.539817339 | 0.546913677 | 0.551541661 | 0.554621892 | 0.562927128 | 0.569185045 | 0.573608451 | 0.584078471 | 0.59098168  | 0.595338211 | 0.594323731 | 0.599476152 | 0.608396827 | 0.620697149 |
| Osaka                     | 0.58209243  | 0.59142542  | 0.600586254 | 0.60838042  | 0.614484104 | 0.620584642 | 0.625178848 | 0.632513145 | 0.639651645 | 0.643288942 | 0.65126147  | 0.659480226 | 0.669958752 | 0.673517358 | 0.678069707 | 0.686152291 | 0.692430197 | 0.697230444 | 0.706595527 | 0.71369359  | 0.71164709  | 0.718466571 | 0.721373087 | 0.726137834 | 0.732605143 |
| Saga                      | 5.12640985  | 0.52342881  | 0.53271328  | 0.539720322 | 0.545452526 | 0.551189458 | 0.556801368 | 0.560863118 | 0.56385216  | 0.568246047 | 0.57491755  | 0.586369751 | 0.596566999 | 0.591751034 | 0.596386637 | 0.605421245 | 0.613111629 | 0.618794121 | 0.62905266  | 0.636974494 | 0.64112195  | 0.648086355 | 0.649632711 | 0.652564098 |             |
| Saitama                   | 0.52385735  | 0.534939994 | 0.544091309 | 0.55181828  | 0.557819518 | 0.563873988 | 0.570430609 | 0.575827664 | 0.579742424 | 0.586281631 | 0.594831485 | 0.603902791 | 0.613026267 | 0.621894555 | 0.6286351   | 0.638314776 | 0.646352012 | 0.653030085 | 0.664433582 | 0.671324362 | 0.676806517 | 0.680023661 | 0.685003509 | 0.69079393  | 0.697604213 |
| Shiga                     | 0.540730672 | 0.551720389 | 0.560692686 | 0.56818829  | 0.573891269 | 0.57962371  | 0.586313629 | 0.590569041 | 0.593295085 | 0.598471942 | 0.602596016 | 0.611986301 | 0.618275143 | 0.623886861 | 0.627616713 | 0.632520047 | 0.641779924 | 0.647109332 | 0.65752211  | 0.666473885 | 0.671740785 | 0.675444447 | 0.681425613 | 0.689633188 | 0.698980156 |
| Shimane                   | 0.49818288  | 0.509209428 | 0.518247492 | 0.528222667 | 0.531617398 | 0.537319046 | 0.54339594  | 0.547448168 | 0.550480188 | 0.555720996 | 0.562475699 | 0.569078885 | 0.575138934 | 0.580080035 | 0.583918678 | 0.598873476 | 0.604102713 | 0.614403577 | 0.622061311 | 0.62936652  | 0.62819272  | 0.632427071 | 0.638980481 | 0.647774379 |             |
| Shizuoka                  | 0.5327679   | 0.548628762 | 0.55974367  | 0.56818466  | 0.575128094 | 0.57855363  | 0.584317622 | 0.592289771 | 0.592685464 | 0.598335498 | 0.60392638  | 0.612300502 | 0.620760197 | 0.631741953 | 0.639837593 | 0.646175379 | 0.650719277 | 0.66058286  | 0.668035864 | 0.671363522 | 0.672278456 | 0.676020865 | 0.681370791 | 0.688781692 |             |
| Tochigi                   | 0.52031752  | 0.534395698 | 0.54397272  | 0.550980161 | 0.557264026 | 0.564546426 | 0.56854543  | 0.572264525 | 0.576495939 | 0.579617224 | 0.586492834 | 0.593750927 | 0.600850922 | 0.60701311  | 0.61173411  | 0.620686545 | 0.62805127  | 0.630395144 | 0.640727558 | 0.65077595  | 0.65761033  | 0.660676646 | 0.664548671 | 0.672046034 | 0.680780442 |
| Tokushima                 | 0.50048984  | 0.51631783  | 0.52561129  | 0.53378555  | 0.539298354 | 0.545172421 | 0.551766355 | 0.55748843  | 0.558698124 | 0.562712504 | 0.570912398 | 0.578074044 | 0.583193818 | 0.597922888 | 0.606322897 | 0.613126179 | 0.618542758 | 0.62967885  | 0.631849013 | 0.649852387 | 0.654023254 | 0.657046676 | 0.662093823 | 0.670643417 |             |
| Tkyō                      | 0.647861924 | 0.657170419 | 0.66580851  | 0.671937376 | 0.677580251 | 0.683199466 | 0.689661804 | 0.696660058 | 0.698436622 | 0.702026516 | 0.708276882 | 0.714775576 | 0.720761151 | 0.726073183 | 0.73045631  | 0.73643337  | 0.741448303 | 0.746298983 | 0.754451518 | 0.761586156 | 0.766272864 | 0.769729011 | 0.774412843 | 0.779875929 | 0.78603363  |
| Tottori                   | 5.1931374   | 0.53073044  | 0.539916411 | 0.547612525 | 0.554323121 | 0.559174561 | 0.565190801 | 0.568814488 | 0.57055574  | 0.57471205  | 0.580491773 | 0.586297376 | 0.591773174 | 0.596313215 | 0.599628312 | 0.607613672 | 0.614660849 | 0.620030565 | 0.630611961 | 0.638792259 | 0.643170848 | 0.645647076 | 0.65004719  | 0.656329969 | 0.664910488 |
| Toyama                    | 0.52743851  | 0.538871338 | 0.548000954 | 0.555712234 | 0.561407298 | 0.567073204 | 0.573598794 | 0.578848587 | 0.580123349 | 0.585212601 | 0.590314181 | 0.601497371 | 0.608269703 | 0.613514103 | 0.61634908  | 0.624605798 | 0.631005094 | 0.631651257 | 0.644633766 | 0.654177426 | 0.655194541 | 0.657764359 | 0.660049374 | 0.666232728 | 0.674568172 |
| Wakayama                  | 0.531670739 | 0.543266233 | 0.55373031  | 0.561715073 | 0.567583911 | 0.573917916 | 0.579975533 | 0.583555229 | 0.585049147 | 0.58975868  | 0.596277103 | 0.603070549 | 0.610161761 | 0.616491138 | 0.621822714 | 0.631181243 | 0.63837342  | 0.643593572 | 0.6536677   | 0.660610682 | 0.662298129 | 0.664110627 | 0.667004329 | 0.672235606 | 0.67987804  |
| Yamagata                  | 0.499093849 | 0.506696031 | 0.518344313 | 0.525630848 | 0.531221748 | 0.536929799 | 0.543375856 | 0.547865176 | 0.551006694 | 0.556238046 | 0.562353046 | 0.570042953 | 0.576304282 | 0.581575299 | 0.586425254 | 0.594232944 | 0.601420609 | 0.607079974 | 0.618109541 | 0.626057782 | 0.629467946 | 0.630992382 | 0.634767055 | 0.640931805 | 0.649321665 |
| Yamaguchi                 | 0.543696508 | 0.549497112 | 0.561126586 | 0.571857995 | 0.577763088 | 0.583656314 | 0.589278871 | 0.59290236  | 0.594051515 | 0.598854498 | 0.606051706 | 0.613528962 | 0.620004732 | 0.625624031 | 0.62978458  | 0.638480980 | 0.645465105 | 0.650740794 | 0.660992478 | 0.668474751 | 0.672036958 | 0.673178224 | 0.676048256 | 0.681190761 | 0.688645281 |
| Yamaguchi                 | 0.522148361 | 0.53181887  | 0.539981811 | 0.546855035 | 0.552534503 | 0.557924147 | 0.564073828 | 0.56891961  | 0.572972725 | 0.578380306 | 0.586628203 | 0.5947328   | 0.602754444 | 0.609802    | 0.615638289 | 0.624378975 | 0.632168847 | 0.638691944 | 0.648134309 | 0.656187023 | 0.661786571 | 0.665895887 | 0.671696004 | 0.67871037  | 0.686395246 |
| South Korea               | 0.3097264   | 0.30559796  | 0.30877134  | 0.31628922  | 0.32284085  | 0.328908043 | 0.334229659 | 0.340167646 | 0.346199802 | 0.352635003 | 0.359270191 | 0.36615153  | 0.373780419 | 0.381398474 | 0.390496888 | 0.399631123 | 0.409852504 | 0.420745053 | 0.432668663 | 0.445874311 | 0.459410895 | 0.472876601 | 0.486116663 | 0.500498781 | 0.514364640 |
| Singapore                 | 0.318636437 | 0.31567934  | 0.309007564 | 0.30781428  | 0.309977561 | 0.312827932 | 0.3180929   | 0.32383134  | 0.331751386 | 0.343481857 | 0.355705504 | 0.365664888 | 0.37442913  | 0.386054598 | 0.3970718   | 0.408979705 | 0.422026037 | 0.437406206 | 0.452861354 | 0.466753741 | 0.479676118 | 0.492046721 | 0.505651671 | 0.51969487  | 0.534586337 |
| High-income North America | 0.615405805 | 0.611225666 | 0.607046161 | 0.603376826 | 0.599892843 | 0.59299942  | 0.586728027 | 0.5843632   | 0.585316223 | 0.587965899 | 0.587965899 | 0.58711968  | 0.58711968  | 0.58711968  | 0.58711968  | 0.58711968  | 0.58711968  | 0.58711968  | 0.58711968  | 0.58711968  | 0.58711968  | 0.58711968  | 0.58711968  | 0.58711968  | 0.58711968  |
| Canada                    | 0.621815371 | 0.61808478  | 0.613632384 | 0.609806277 | 0.60749277  | 0.606433663 | 0.603681787 | 0.601483406 | 0.600804454 | 0.601721252 | 0.605129671 | 0.610019533 | 0.616790359 | 0.626138157 | 0.63922646  | 0.652544009 | 0.663270424 | 0.671620399 | 0.678478824 | 0.684461405 | 0.691758273 | 0.700928389 | 0.709245948 | 0.715559682 | 0.719999562 |
| Greenland                 | 0.564999791 | 0.564103814 | 0.5599585   | 0.552467284 | 0.543043839 | 0.534858189 | 0.52920666  | 0.523779853 | 0.517467732 | 0.510117133 | 0.502417073 | 0.495455563 | 0.488893291 | 0.483348866 | 0.486242537 | 0.502169744 | 0.525449914 | 0.548114088 | 0.575224966 | 0.608295446 | 0.63782618  | 0.659857848 | 0.67752582  | 0.69151684  | 0.701230038 |
| USA                       | 0.614249877 | 0.60998157  | 0.606821298 | 0.602157938 | 0.595852943 | 0.59049137  | 0.584201380 | 0.582380743 | 0.583007096 | 0.584187621 | 0.587488888 | 0.592806869 | 0.607399068 | 0.621313025 | 0.636729173 | 0.650753734 | 0.662202883 | 0.672114057 | 0.678514402 | 0.682948264 | 0.690945201 | 0.704738203 | 0.716626257 | 0.724785468 | 0.730619178 |
| Alabama                   | 0.549755378 | 0.546032463 | 0.543073584 | 0.538975176 | 0.53155665  | 0.525024205 | 0.518136411 | 0.516222382 | 0.517083084 | 0.518273359 | 0.521900683 | 0.53086782  | 0.545467427 | 0.560469093 | 0.577790238 | 0.593371171 | 0.606023144 | 0.61681338  | 0.62289093  | 0.624741776 | 0.63078292  | 0.642573886 | 0.661050255 | 0.678880366 | 0.687688204 |
| Alaska                    | 0.593678794 | 0.587693434 | 0.582312225 | 0.578235676 | 0.561296402 | 0.547541416 | 0.52823236  | 0.525580046 | 0.528250616 | 0.520765837 | 0.521190681 | 0.533219508 | 0.550992299 | 0.572084477 | 0.595686366 | 0.61601546  | 0.631392854 | 0.643925752 | 0.655338272 | 0.665593083 | 0.668012592 | 0.682966325 | 0.70741338  | 0.718689957 | 0.720665491 |
| Arizona                   | 0.605881653 | 0.600731934 | 0.59686354  | 0.589595151 | 0.581992823 | 0.573214192 | 0.564638419 | 0.561567586 | 0.561296319 | 0.567069621 | 0.56498612  | 0.573270701 | 0.581371829 | 0.602694291 | 0.620021725 | 0.635131408 | 0.646804477 | 0.656547851 | 0.662031618 | 0.665451383 | 0.670616185 | 0.681825076 | 0.702034062 | 0.710200513 |             |
| Arkansas                  | 0.544457087 | 0.540159053 | 0.536460496 | 0.53046265  | 0.523587044 | 0.516194133 | 0.508415806 | 0.505588608 | 0.505941279 | 0.506463676 | 0.509705297 | 0.518789082 | 0.53387677  | 0.550171822 | 0.56842563  | 0.58485289  | 0.597924796 | 0.609078087 | 0.61503348  | 0.616140904 | 0.621092293 | 0.634651317 | 0.647832843 | 0.655497829 | 0.662571371 |
| California                | 0.649715291 | 0.646345483 | 0.644024896 | 0.640141678 | 0.632595378 | 0.630177437 | 0.625176623 | 0.624329688 | 0.625435746 | 0.627062666 | 0.630242378 | 0.637315187 | 0.648231365 |             |             |             |             |             |             |             |             |             |             |             |             |

|                        |             |             |             |             |             |              |             |             |             |             |             |             |             |              |             |             |             |             |             |             |             |             |             |             |             |
|------------------------|-------------|-------------|-------------|-------------|-------------|--------------|-------------|-------------|-------------|-------------|-------------|-------------|-------------|--------------|-------------|-------------|-------------|-------------|-------------|-------------|-------------|-------------|-------------|-------------|-------------|
| Utah                   | 0.62779881  | 0.622645868 | 0.6179987   | 0.61127746  | 0.603183915 | 0.59470865   | 0.586033942 | 0.582114    | 0.58084358  | 0.58062359  | 0.58182708  | 0.590988548 | 0.60378137  | 0.619016464  | 0.63609343  | 0.65155809  | 0.66322687  | 0.672284066 | 0.67850788  | 0.67801553  | 0.682614403 | 0.691014635 | 0.701341655 | 0.710051997 |             |
| Vermont                | 0.61048097  | 0.606973102 | 0.602294737 | 0.597391717 | 0.59196802  | 0.585326777  | 0.579459026 | 0.573942624 | 0.575998335 | 0.581953848 | 0.586689147 | 0.595679731 | 0.608864171 | 0.626403161  | 0.639909777 | 0.654972617 | 0.667437101 | 0.676286718 | 0.685881875 | 0.691307487 | 0.701901068 | 0.712567899 | 0.724719038 | 0.733939345 | 0.740873799 |
| Virginia               | 0.603507465 | 0.600071462 | 0.597490134 | 0.593050044 | 0.587736824 | 0.581825705  | 0.575819211 | 0.574574827 | 0.575994833 | 0.577997398 | 0.581889619 | 0.590278631 | 0.60142259  | 0.617672012  | 0.63350261  | 0.64805922  | 0.660151736 | 0.670982131 | 0.678962325 | 0.684564899 | 0.691387377 | 0.700866899 | 0.719211874 | 0.726697673 | 0.736063806 |
| Washington             | 0.643667478 | 0.639160833 | 0.635987678 | 0.631585759 | 0.626382784 | 0.620743245  | 0.615130003 | 0.613945989 | 0.615922116 | 0.61695726  | 0.620596483 | 0.628298366 | 0.640070303 | 0.6513195016 | 0.667372254 | 0.68040389  | 0.691333523 | 0.701093731 | 0.708140341 | 0.714234017 | 0.72073047  | 0.728462544 | 0.747002871 | 0.753826341 | 0.760280862 |
| West Virginia          | 0.560926094 | 0.559408283 | 0.559799079 | 0.558389703 | 0.556655181 | 0.5539138612 | 0.551957602 | 0.52987132  | 0.530416419 | 0.531626755 | 0.533091766 | 0.543290136 | 0.556288263 | 0.571336691  | 0.58741921  | 0.602382418 | 0.615035439 | 0.625328752 | 0.631647738 | 0.634794588 | 0.64141982  | 0.652983599 | 0.66476988  | 0.673123682 | 0.678772679 |
| Wisconsin              | 0.629425136 | 0.626154656 | 0.623224283 | 0.619011403 | 0.613728514 | 0.608567839  | 0.603349433 | 0.601883735 | 0.602509748 | 0.6040496   | 0.607443606 | 0.614356306 | 0.625106409 | 0.638532786  | 0.651878776 | 0.665205209 | 0.67865399  | 0.691969806 | 0.697127113 | 0.705524342 | 0.716845788 | 0.727079427 | 0.734145925 | 0.739025411 |             |
| Wyoming                | 0.613429441 | 0.606778209 | 0.606639907 | 0.602592508 | 0.598327062 | 0.593514596  | 0.586396194 | 0.580322666 | 0.599907808 | 0.560344014 | 0.563615543 | 0.572558318 | 0.587376762 | 0.609017702  | 0.624272662 | 0.638173451 | 0.651031454 | 0.661180055 | 0.6670606   | 0.670543877 | 0.678790517 | 0.691071921 | 0.702208831 | 0.709559028 | 0.714302326 |
| Southern Latin America | 0.470229439 | 0.473016503 | 0.473956852 | 0.475152482 | 0.476753388 | 0.478111673  | 0.479413528 | 0.482395358 | 0.486312197 | 0.489127784 | 0.492020081 | 0.494001152 | 0.4961439   | 0.49873004   | 0.502746207 | 0.508293987 | 0.513844816 | 0.517934198 | 0.51899222  | 0.520620226 | 0.523495444 | 0.525975294 | 0.529252445 | 0.533448991 | 0.533778427 |
| Argentina              | 0.479474011 | 0.482482066 | 0.483157905 | 0.484555283 | 0.486586009 | 0.488890106  | 0.490812827 | 0.492844538 | 0.498757065 | 0.502523159 | 0.506390831 | 0.509071167 | 0.511312096 | 0.514057492  | 0.518572448 | 0.524415317 | 0.529119626 | 0.531300199 | 0.529381098 | 0.529137465 | 0.532730559 | 0.53739124  | 0.542521281 | 0.545863041 | 0.541627207 |
| Chile                  | 0.43832509  | 0.440184668 | 0.44226612  | 0.444437352 | 0.445734708 | 0.44642274   | 0.443975042 | 0.446132915 | 0.450008783 | 0.45274579  | 0.457054052 | 0.465828267 | 0.48293902  | 0.460754965  | 0.464550943 | 0.469888686 | 0.477185978 | 0.485622425 | 0.49427003  | 0.500725194 | 0.502549004 | 0.509380934 | 0.500003854 | 0.506754886 | 0.517099415 |
| Europe                 | 0.473615157 | 0.481346112 | 0.48216131  | 0.48246253  | 0.481886668 | 0.48237206   | 0.484963753 | 0.487531828 | 0.488802871 | 0.487224229 | 0.48482646  | 0.485272856 | 0.486400721 | 0.48940240   | 0.490980772 | 0.49507839  | 0.503391641 | 0.510114646 | 0.512014232 | 0.512607922 | 0.513406479 | 0.514811266 | 0.515898722 | 0.517317233 | 0.52068153  |
| Western Europe         | 0.482361    | 0.486146516 | 0.48782034  | 0.491621734 | 0.494391125 | 0.496411109  | 0.4991487   | 0.50115728  | 0.501608860 | 0.503100537 | 0.506844925 | 0.508832773 | 0.508800344 | 0.509805448  | 0.510561461 | 0.514306431 | 0.518097172 | 0.523983573 | 0.529315386 | 0.534631161 | 0.539408968 | 0.544861191 | 0.551796502 | 0.565470824 | 0.665497292 |
| Austria                | 0.608750204 | 0.607135521 | 0.61728061  | 0.627791139 | 0.629912561 | 0.636994652  | 0.641774913 | 0.641154500 | 0.640084427 | 0.646427474 | 0.651901807 | 0.660350934 | 0.66993322  | 0.682402122  | 0.68750629  | 0.672495956 | 0.67429045  | 0.682462661 | 0.687455379 | 0.692211439 | 0.696192136 | 0.700972922 | 0.706520351 | 0.712187559 |             |
| Austria                | 0.600576811 | 0.604569456 | 0.60569107  | 0.606650728 | 0.607344174 | 0.606516403  | 0.605338862 | 0.60442145  | 0.602914298 | 0.603260388 | 0.604505952 | 0.605544811 | 0.608247685 | 0.612581829  | 0.617388815 | 0.619185787 | 0.619200938 | 0.620335939 | 0.62435109  | 0.631864371 | 0.64051539  | 0.648283078 | 0.655614213 | 0.661676383 | 0.668535879 |
| Belgium                | 0.57346435  | 0.570675574 | 0.571168567 | 0.57900298  | 0.57815209  | 0.574221186  | 0.578534306 | 0.578791227 | 0.579124285 | 0.580260986 | 0.581080893 | 0.581685631 | 0.582643258 | 0.583972043  | 0.58751766  | 0.593140385 | 0.599035204 | 0.604874608 | 0.60997701  | 0.614162668 | 0.618296137 | 0.624310798 | 0.632548003 | 0.641501939 | 0.649913109 |
| Cyprus                 | 0.451021417 | 0.45536     | 0.461172077 | 0.46368085  | 0.467400481 | 0.467353282  | 0.467459479 | 0.469190507 | 0.472554381 | 0.477361842 | 0.48003431  | 0.485188011 | 0.490811011 | 0.49719066   | 0.502266353 | 0.506606588 | 0.510465769 | 0.516785233 | 0.52586567  | 0.537493979 | 0.545287141 | 0.552279654 | 0.56339037  | 0.570417477 | 0.573991864 |
| Denmark                | 0.6341512   | 0.63744266  | 0.63048055  | 0.63353895  | 0.633690414 | 0.633389148  | 0.633923402 | 0.63598159  | 0.638766579 | 0.641508853 | 0.64319447  | 0.644557132 | 0.645697166 | 0.646976812  | 0.649749326 | 0.652366993 | 0.661847335 | 0.675997179 | 0.6893409   | 0.6990053   | 0.70386327  | 0.707062406 | 0.711731349 | 0.71614957  | 0.719492671 |
| Finland                | 0.565768936 | 0.568974085 | 0.56993436  | 0.570130085 | 0.571804211 | 0.573165104  | 0.57591829  | 0.580582319 | 0.584127355 | 0.58624759  | 0.58884135  | 0.592839822 | 0.594804984 | 0.599328233  | 0.606454453 | 0.618752607 | 0.624872449 | 0.63173343  | 0.641921131 | 0.650317738 | 0.658870573 | 0.666574039 | 0.673190302 | 0.679227507 |             |
| France                 | 0.540784786 | 0.54592229  | 0.54925301  | 0.552073469 | 0.554424414 | 0.557020619  | 0.560044061 | 0.562983588 | 0.564154199 | 0.564830003 | 0.566059382 | 0.567221523 | 0.567349365 | 0.567289846  | 0.571011229 | 0.576603406 | 0.583391746 | 0.591131666 | 0.597744508 | 0.60270952  | 0.606155282 | 0.610924055 | 0.618243754 | 0.628221143 | 0.639306824 |
| Germany                | 0.640368557 | 0.645620404 | 0.650650846 | 0.656981337 | 0.663159923 | 0.667077697  | 0.669769092 | 0.671221429 | 0.672986542 | 0.673654462 | 0.674859598 | 0.67556276  | 0.67690254  | 0.679490439  | 0.682325689 | 0.684927912 | 0.689282188 | 0.69472555  | 0.700392535 | 0.708541878 | 0.715861969 | 0.720303226 | 0.733818633 | 0.741401382 | 0.746605617 |
| Greece                 | 0.508330956 | 0.512960833 | 0.516162781 | 0.519737013 | 0.521811704 | 0.525431544  | 0.530475125 | 0.534740937 | 0.537590518 | 0.540007715 | 0.544540952 | 0.548404687 | 0.550365637 | 0.551567666  | 0.552102326 | 0.551905206 | 0.549713407 | 0.548574371 | 0.551881437 | 0.558703078 | 0.56163358  | 0.572345340 | 0.577627671 | 0.580043871 | 0.581840085 |
| Iceland                | 0.562964295 | 0.561914733 | 0.558867392 | 0.555127828 | 0.552033799 | 0.550416711  | 0.55003603  | 0.551064256 | 0.552630572 | 0.556812778 | 0.561344081 | 0.564590062 | 0.567230730 | 0.571386166  | 0.578372699 | 0.587096123 | 0.598003334 | 0.609200441 | 0.618287427 | 0.624035294 | 0.628455194 | 0.637114710 | 0.653711471 | 0.669956556 | 0.675739422 |
| Iceland                | 0.57381662  | 0.580197481 | 0.583078031 | 0.586450975 | 0.590858774 | 0.592106185  | 0.593210685 | 0.595362458 | 0.596903004 | 0.598350968 | 0.599457000 | 0.600579656 | 0.601736975 | 0.603139661  | 0.604776063 | 0.607106539 | 0.609731534 | 0.615774365 | 0.618078267 | 0.620867399 | 0.624060233 | 0.630931807 | 0.641323691 | 0.647693452 | 0.654293192 |
| Israel                 | 0.508746839 | 0.502561464 | 0.501822689 | 0.503782465 | 0.51514546  | 0.511886998  | 0.522489182 | 0.529030892 | 0.538776512 | 0.544814534 | 0.549893387 | 0.554679121 | 0.558392596 | 0.561271387  | 0.56600003  | 0.573483884 | 0.58351663  | 0.594719263 | 0.599899817 | 0.60291739  | 0.609479768 | 0.608979602 | 0.613530887 | 0.616401058 | 0.618655404 |
| Italy                  | 0.525660918 | 0.530982125 | 0.53446099  | 0.537040271 | 0.539461854 | 0.542313521  | 0.545335793 | 0.548933632 | 0.552106337 | 0.555068007 | 0.558362641 | 0.56111472  | 0.562664288 | 0.562794157  | 0.563732205 | 0.567301378 | 0.571956413 | 0.576362665 | 0.58050170  | 0.584149954 | 0.587531495 | 0.590667034 | 0.593447578 | 0.596578962 | 0.60134894  |
| Abruzzo                | 0.52726463  | 0.532997058 | 0.536695119 | 0.539838731 | 0.541896598 | 0.544846333  | 0.547978532 | 0.551638286 | 0.54831618  | 0.557753811 | 0.561104321 | 0.563707362 | 0.565157919 | 0.565305661  | 0.564496566 | 0.570384891 | 0.57542939  | 0.58026107  | 0.584841768 | 0.58906664  | 0.593135349 | 0.597612929 | 0.600342701 | 0.604252626 | 0.609617901 |
| Basilicata             | 0.477542098 | 0.483001402 | 0.486445831 | 0.488883743 | 0.491078866 | 0.493738994  | 0.496654148 | 0.499912907 | 0.502695528 | 0.505113939 | 0.50777222  | 0.509689529 | 0.510085871 | 0.508765518  | 0.508057147 | 0.51142882  | 0.515710776 | 0.5196083   | 0.523239955 | 0.526462625 | 0.529653134 | 0.533026828 | 0.535123295 | 0.53839771  | 0.543899575 |
| Calabria               | 0.463910487 | 0.469726685 | 0.473150293 | 0.475350833 | 0.477295961 | 0.479733801  | 0.482278538 | 0.485426471 | 0.489764261 | 0.48996143  | 0.492227596 | 0.493687051 | 0.49332166  | 0.490414694  | 0.48866728  | 0.491405469 | 0.495648016 | 0.499476243 | 0.502827276 | 0.50573347  | 0.508483496 | 0.513078091 | 0.513117018 | 0.515840919 | 0.521279991 |
| Campania               | 0.48598305  | 0.491891084 | 0.495859856 | 0.498187497 | 0.497595983 | 0.500339378  | 0.50266283  | 0.506969275 | 0.514296405 | 0.514831398 | 0.517439462 | 0.519274644 | 0.519321062 | 0.51745112   | 0.516508489 | 0.518998348 | 0.522946206 | 0.526337573 | 0.529231373 | 0.531484444 | 0.533202208 | 0.534661883 | 0.535585899 | 0.536849211 | 0.540625124 |
| Emilia-Romagna         | 0.549166251 | 0.554537063 | 0.557610731 | 0.559898149 | 0.561829266 | 0.564249076  | 0.566821465 | 0.569771772 | 0.572575695 | 0.574839117 | 0.577485196 | 0.579439671 | 0.579897005 | 0.578756449  | 0.578677682 | 0.581774055 | 0.586290912 | 0.590446202 | 0.594351133 | 0.597749981 | 0.60085485  | 0.603577651 | 0.606265315 | 0.60924779  | 0.614108495 |
| Friuli-Venezia Giulia  | 0.544289614 | 0.549465763 | 0.552916398 | 0.556683071 | 0.558223523 | 0.561205885  | 0.564279196 | 0.567882199 | 0.57150836  | 0.574337973 | 0.578348481 | 0.581040343 | 0.583344471 |              |             |             |             |             |             |             |             |             |             |             |             |



|                      |             |             |             |             |             |             |             |             |             |             |             |             |             |             |             |             |             |             |             |             |             |             |             |             |             |
|----------------------|-------------|-------------|-------------|-------------|-------------|-------------|-------------|-------------|-------------|-------------|-------------|-------------|-------------|-------------|-------------|-------------|-------------|-------------|-------------|-------------|-------------|-------------|-------------|-------------|-------------|
| England              | 0.590307919 | 0.59260260  | 0.59400918  | 0.59589955  | 0.59879415  | 0.59902495  | 0.59739384  | 0.59680743  | 0.59765929  | 0.59739239  | 0.59749744  | 0.59510628  | 0.59612942  | 0.59813457  | 0.60231068  | 0.60086875  | 0.61580639  | 0.62334117  | 0.61365417  | 0.63825132  | 0.64436248  | 0.65286588  | 0.66381658  | 0.67622447  | 0.68120855  |
| East Midlands        | 0.55453889  | 0.55789303  | 0.55813661  | 0.55996375  | 0.56297496  | 0.563090156 | 0.5616742   | 0.560731024 | 0.56113203  | 0.56065274  | 0.55863291  | 0.55731616  | 0.55868289  | 0.56069916  | 0.56171311  | 0.57204899  | 0.57996269  | 0.58286666  | 0.58698785  | 0.605031478 | 0.61163214  | 0.62102669  | 0.63321619  | 0.64375597  | 0.65233425  |
| Derby                | 0.563087955 | 0.56608376  | 0.56649475  | 0.56798203  | 0.57081321  | 0.57013888  | 0.5670298   | 0.565257315 | 0.56537831  | 0.56385919  | 0.56034469  | 0.55824628  | 0.55840492  | 0.55974723  | 0.56388205  | 0.57116087  | 0.57970818  | 0.58889827  | 0.59798176  | 0.60666634  | 0.613414046 | 0.623593504 | 0.637214022 | 0.648536375 | 0.65810384  |
| Derbyshire           | 0.55516841  | 0.55844904  | 0.55914780  | 0.56086706  | 0.56375316  | 0.563725108 | 0.56165523  | 0.560763828 | 0.56146310  | 0.560296143 | 0.55825179  | 0.557816144 | 0.55865904  | 0.560635169 | 0.564947467 | 0.57162972  | 0.579372743 | 0.587511787 | 0.59598192  | 0.604042923 | 0.61060414  | 0.61993346  | 0.623072805 | 0.624348217 | 0.65097868  |
| Leicester            | 0.53002761  | 0.53282366  | 0.53287794  | 0.53400448  | 0.53655391  | 0.536573573 | 0.53234283  | 0.53025429  | 0.529974915 | 0.528153394 | 0.52439184  | 0.52184917  | 0.52168955  | 0.52227283  | 0.52685551  | 0.5342635   | 0.542958794 | 0.55222008  | 0.561978804 | 0.571123345 | 0.578236769 | 0.58888378  | 0.60129255  | 0.614880112 | 0.62499945  |
| Leicestershire       | 0.5898176   | 0.59039766  | 0.59140577  | 0.596194856 | 0.59938354  | 0.600070523 | 0.599109608 | 0.599005101 | 0.60021397  | 0.600376297 | 0.599272428 | 0.599088697 | 0.600352866 | 0.602671047 | 0.607306668 | 0.613991766 | 0.621407561 | 0.629219191 | 0.637254576 | 0.644829883 | 0.651048811 | 0.65944011  | 0.670328511 | 0.67966609  | 0.68705314  |
| Lincolnshire         | 0.555454743 | 0.55920562  | 0.560935838 | 0.56381403  | 0.563823195 | 0.56172616  | 0.56082366  | 0.561457331 | 0.561002134 | 0.558859697 | 0.557841633 | 0.55715600  | 0.56072800  | 0.565104869 | 0.5719308   | 0.579813584 | 0.58158634  | 0.604916534 | 0.611500135 | 0.620935808 | 0.632321872 | 0.639257984 | 0.646250639 | 0.652406439 |             |
| Northamptonshire     | 0.56707858  | 0.570151865 | 0.570863988 | 0.57260651  | 0.575578854 | 0.575437757 | 0.573084184 | 0.572001932 | 0.572595337 | 0.571883862 | 0.569556378 | 0.56853376  | 0.569543976 | 0.571622366 | 0.57617423  | 0.583227361 | 0.591327975 | 0.599950567 | 0.608839216 | 0.619432286 | 0.630691334 | 0.646292566 | 0.65696593  | 0.66989133  |             |
| Nottingham           | 0.567214918 | 0.570142967 | 0.570704199 | 0.572290044 | 0.575909821 | 0.574949495 | 0.572760752 | 0.571657803 | 0.57214617  | 0.57135754  | 0.56899005  | 0.567719136 | 0.568311127 | 0.570055052 | 0.57423164  | 0.581147766 | 0.589049533 | 0.597406201 | 0.60118656  | 0.614383036 | 0.620989773 | 0.630550111 | 0.642939998 | 0.653435222 | 0.66202237  |
| Nottinghamshire      | 0.555783731 | 0.558813128 | 0.559625698 | 0.561457353 | 0.564442055 | 0.564546883 | 0.562642716 | 0.561862378 | 0.56265706  | 0.562227079 | 0.560248309 | 0.55939955  | 0.560237983 | 0.562528586 | 0.56587595  | 0.57327809  | 0.580958946 | 0.589054431 | 0.597479719 | 0.605486093 | 0.612003871 | 0.621223306 | 0.633226891 | 0.643196273 | 0.651924368 |
| Orkney               | 0.605750896 | 0.608895713 | 0.610148124 | 0.61245182  | 0.615832748 | 0.616710231 | 0.619629645 | 0.616060686 | 0.617528589 | 0.617882501 | 0.616999615 | 0.617888125 | 0.61904384  | 0.621875883 | 0.62671782  | 0.634032271 | 0.640790755 | 0.648442317 | 0.656268838 | 0.663539862 | 0.669518302 | 0.675675393 | 0.687979971 | 0.696817777 | 0.701711528 |
| East of England      | 0.582422005 | 0.58526289  | 0.586901808 | 0.589791167 | 0.59076275  | 0.590990838 | 0.589318199 | 0.588813116 | 0.589841292 | 0.589475097 | 0.587937411 | 0.587411951 | 0.588205196 | 0.590729881 | 0.595076836 | 0.601477256 | 0.603221386 | 0.616176707 | 0.624722567 | 0.63221338  | 0.632042762 | 0.64664403  | 0.657789019 | 0.667253945 | 0.675221944 |
| Bedford              | 0.588351252 | 0.59125356  | 0.592068003 | 0.593701529 | 0.59693087  | 0.597035263 | 0.595150207 | 0.594115533 | 0.595235148 | 0.594857595 | 0.593052471 | 0.592390623 | 0.593254263 | 0.593730021 | 0.600101312 | 0.606662998 | 0.614183797 | 0.62208862  | 0.630275851 | 0.637718532 | 0.645237655 | 0.652226903 | 0.66272835  | 0.673308374 | 0.681321049 |
| Cambridgeshire       | 0.623299139 | 0.62602300  | 0.62698439  | 0.62889831  | 0.63170667  | 0.632343659 | 0.631491027 | 0.631482549 | 0.632672044 | 0.633064662 | 0.632457239 | 0.632641359 | 0.63407585  | 0.636423212 | 0.640661138 | 0.646724763 | 0.65349721  | 0.660691328 | 0.668130031 | 0.675178645 | 0.680915542 | 0.688448019 | 0.698229461 | 0.706741554 | 0.713991116 |
| Central Bedfordshire | 0.586574053 | 0.589358238 | 0.590521741 | 0.592400352 | 0.595414506 | 0.59587761  | 0.593786945 | 0.593111301 | 0.593970766 | 0.593638092 | 0.591834159 | 0.591174894 | 0.592270211 | 0.594443935 | 0.598808967 | 0.603546142 | 0.612897976 | 0.620831808 | 0.628998696 | 0.636403358 | 0.642669947 | 0.651378329 | 0.662932748 | 0.672882624 | 0.680860127 |
| Essex                | 0.573187088 | 0.576110294 | 0.576982806 | 0.578871468 | 0.5819783   | 0.582105059 | 0.58007604  | 0.580084352 | 0.580997302 | 0.580863789 | 0.579416433 | 0.578926072 | 0.580023023 | 0.582186578 | 0.586517001 | 0.593171596 | 0.600619231 | 0.608453187 | 0.616524088 | 0.624106713 | 0.63008019  | 0.638573011 | 0.649787725 | 0.659286788 | 0.667363015 |
| Hertfordshire        | 0.628290402 | 0.631272554 | 0.632487706 | 0.634541674 | 0.637528772 | 0.63820264  | 0.637214223 | 0.637184505 | 0.63836771  | 0.638604144 | 0.637337502 | 0.637769293 | 0.639179733 | 0.64141973  | 0.645537814 | 0.651477858 | 0.658215816 | 0.665274423 | 0.67251633  | 0.679318809 | 0.6884472   | 0.696246671 | 0.702370474 | 0.710947985 | 0.71821719  |
| Leamington           | 0.57006739  | 0.57006739  | 0.57524255  | 0.585838767 | 0.561158766 | 0.564028054 | 0.557322985 | 0.55424434  | 0.553710001 | 0.553763311 | 0.550175874 | 0.547803593 | 0.547639103 | 0.548831966 | 0.552976166 | 0.560206818 | 0.568641457 | 0.575732324 | 0.583761623 | 0.591605693 | 0.601656963 | 0.611662988 | 0.62580113  | 0.634834356 | 0.645425756 |
| Norfolk              | 0.566623432 | 0.569911974 | 0.569736379 | 0.571292038 | 0.573884603 | 0.573783846 | 0.571878481 | 0.570934322 | 0.571585749 | 0.571134612 | 0.569282044 | 0.568498463 | 0.569524033 | 0.571585448 | 0.575858964 | 0.582392304 | 0.589896243 | 0.597744813 | 0.605839648 | 0.613463933 | 0.619572527 | 0.62828788  | 0.639633924 | 0.649351614 | 0.657554778 |
| Peterborough         | 0.59541142  | 0.59242836  | 0.592661816 | 0.593973581 | 0.596654529 | 0.596492951 | 0.592063209 | 0.594994338 | 0.59817731  | 0.598081041 | 0.594241262 | 0.591802671 | 0.591982711 | 0.593318317 | 0.597634715 | 0.601560425 | 0.607521665 | 0.62461182  | 0.631913126 | 0.640560468 | 0.64714493  | 0.657246903 | 0.667129403 | 0.675213074 | 0.683130734 |
| Southend-on-Sea      | 0.54571174  | 0.55001463  | 0.55042502  | 0.55186312  | 0.554372731 | 0.554082786 | 0.551828308 | 0.550742648 | 0.551250467 | 0.550552851 | 0.548375774 | 0.547367806 | 0.548254457 | 0.55024867  | 0.55426627  | 0.561178809 | 0.568935561 | 0.577062694 | 0.584545524 | 0.593213566 | 0.599696222 | 0.60862129  | 0.620528579 | 0.630640389 | 0.63919022  |
| Suffolk              | 0.568703808 | 0.571536648 | 0.571971931 | 0.57323603  | 0.575834648 | 0.575374694 | 0.572768166 | 0.571402411 | 0.5717603   | 0.57075994  | 0.568177999 | 0.566833098 | 0.567332573 | 0.569445526 | 0.573761004 | 0.580546207 | 0.58844048  | 0.596770369 | 0.605399377 | 0.61341614  | 0.61966685  | 0.628911859 | 0.641264994 | 0.651595942 | 0.660205282 |
| Thurrock             | 0.55685105  | 0.559638901 | 0.560199014 | 0.561717062 | 0.564593014 | 0.565799047 | 0.561150236 | 0.565897645 | 0.569912021 | 0.571302818 | 0.568064466 | 0.56443078  | 0.565885801 | 0.561190977 | 0.568096167 | 0.575990964 | 0.584927035 | 0.593569377 | 0.601304732 | 0.607872346 | 0.614736717 | 0.629720074 | 0.640195177 | 0.649037817 |             |
| Greater London       | 0.612722468 | 0.625404187 | 0.62689338  | 0.629376418 | 0.63309581  | 0.63418471  | 0.63351955  | 0.63413193  | 0.63267776  | 0.63740356  | 0.637332141 | 0.638304132 | 0.640098706 | 0.644376298 | 0.649705909 | 0.658031064 | 0.664542061 | 0.672481293 | 0.6805708   | 0.689792228 | 0.694016342 | 0.701959898 | 0.712168289 | 0.720871028 | 0.728290912 |
| Barking and Dagenham | 0.513853288 | 0.51694269  | 0.517331658 | 0.51888737  | 0.521813434 | 0.521511202 | 0.519173814 | 0.518122498 | 0.518910329 | 0.518395629 | 0.51622362  | 0.515382751 | 0.516808485 | 0.519307568 | 0.524291104 | 0.531869960 | 0.540605518 | 0.549618333 | 0.558098079 | 0.567666029 | 0.575480061 | 0.585042627 | 0.597263295 | 0.608174559 | 0.617494689 |
| Barnet               | 0.60999424  | 0.613402474 | 0.614862951 | 0.617291748 | 0.620842052 | 0.62219452  | 0.622015379 | 0.622859477 | 0.624960074 | 0.626270856 | 0.62668749  | 0.628042054 | 0.630701163 | 0.634168127 | 0.639282873 | 0.645756127 | 0.653085142 | 0.66077955  | 0.668396894 | 0.67557642  | 0.681656944 | 0.68964295  | 0.69949509  | 0.70812747  | 0.715949699 |
| Bexley               | 0.554120676 | 0.55785739  | 0.558926336 | 0.561278825 | 0.56479656  | 0.565814858 | 0.565096798 | 0.56485311  | 0.567366141 | 0.568286829 | 0.56990479  | 0.568678498 | 0.571171591 | 0.574465319 | 0.579638721 | 0.586607788 | 0.594385775 | 0.60248288  | 0.61071594  | 0.618377163 | 0.626826707 | 0.634076357 | 0.642374647 | 0.651760399 | 0.661760399 |
| Brent                | 0.570567924 | 0.574012571 | 0.575022591 | 0.577160847 | 0.580682541 | 0.581178619 | 0.57979435  | 0.5796634   | 0.583131827 | 0.581757943 | 0.580711066 | 0.580882351 | 0.58299365  | 0.586119961 | 0.591453586 | 0.598900183 | 0.607342886 | 0.616145327 | 0.625210386 | 0.63422734  | 0.639738484 | 0.646373122 | 0.654131777 | 0.661466661 | 0.680159053 |
| Bromley              | 0.599913065 | 0.605470624 | 0.605275293 | 0.607901921 | 0.611603771 | 0.613132341 | 0.613184336 | 0.61420219  | 0.616482786 | 0.617922468 | 0.618498117 | 0.619989388 | 0.622494923 | 0.626302191 | 0.631368919 | 0.637848108 | 0.645083778 | 0.652654421 | 0.660175821 | 0.667201381 | 0.67317622  | 0.681077999 | 0.690758197 | 0.700516801 |             |
| Camden               | 0.716813381 | 0.720301931 | 0.722303742 | 0.725171298 | 0.728940165 | 0.731228086 | 0.732536481 | 0.734560854 | 0.737439897 | 0.73988787  | 0.741822889 | 0.744336355 | 0.747634193 | 0.751503925 | 0.765338292 | 0.762608333 | 0.769304151 | 0.7761705   | 0.783074554 | 0.789623665 | 0.795379389 | 0.801795294 | 0.809547959 | 0.816320698 | 0.821407096 |
| Croydon              | 0.571158426 | 0.574831514 | 0.576177808 | 0.578587893 | 0.582273966 | 0.583193309 | 0.582290729 | 0.582440472 | 0.584338271 | 0.585122954 | 0.584568054 | 0.585170727 | 0.587581529 | 0.590094091 | 0.59628     |             |             |             |             |             |             |             |             |             |             |



|                             |              |             |             |             |             |             |             |             |             |             |             |             |             |             |             |             |             |             |             |             |             |             |             |             |             |             |
|-----------------------------|--------------|-------------|-------------|-------------|-------------|-------------|-------------|-------------|-------------|-------------|-------------|-------------|-------------|-------------|-------------|-------------|-------------|-------------|-------------|-------------|-------------|-------------|-------------|-------------|-------------|-------------|
| Walsall                     | 0.5213919469 | 0.525291927 | 0.525295129 | 0.526964375 | 0.528578887 | 0.528444811 | 0.52501217  | 0.522827669 | 0.522470539 | 0.52059345  | 0.516742217 | 0.51416477  | 0.51384673  | 0.514812874 | 0.518864554 | 0.526181584 | 0.534899244 | 0.541159074 | 0.555774968 | 0.562763921 | 0.569595924 | 0.580084898 | 0.594110083 | 0.605265256 | 0.615838813 |             |
| Warwickshire                | 0.59815844   | 0.600108827 | 0.60182607  | 0.603083087 | 0.605749778 | 0.605730617 | 0.603819417 | 0.602959137 | 0.603595333 | 0.603130102 | 0.601287406 | 0.600530571 | 0.601421171 | 0.603393992 | 0.607731    | 0.614524329 | 0.622531019 | 0.630676128 | 0.639237507 | 0.64723958  | 0.653598229 | 0.662621264 | 0.674342424 | 0.684185823 | 0.692474288 |             |
| Wolverhampton               | 0.534096191  | 0.536753628 | 0.536662572 | 0.537517165 | 0.539866427 | 0.538675896 | 0.535207624 | 0.53211796  | 0.530075926 | 0.526013529 | 0.523310828 | 0.522883621 | 0.523286252 | 0.527840276 | 0.535173486 | 0.543976707 | 0.553327744 | 0.563040190 | 0.572134229 | 0.578987277 | 0.589479434 | 0.603599802 | 0.615272022 | 0.625211791 | 0.632591702 |             |
| Worcestershire              | 0.57620441   | 0.579047102 | 0.579623816 | 0.581150857 | 0.583206226 | 0.58374587  | 0.58185121  | 0.58060032  | 0.581556909 | 0.581016014 | 0.579116492 | 0.578415992 | 0.579376796 | 0.58136808  | 0.58571532  | 0.592500363 | 0.600376832 | 0.608718504 | 0.617347479 | 0.625493559 | 0.632004505 | 0.641169588 | 0.653114909 | 0.663315333 | 0.671977602 |             |
| Yorkshire and the Humber    | 0.553470972  | 0.556579982 | 0.557267813 | 0.559023113 | 0.562054069 | 0.562137421 | 0.560148562 | 0.559931406 | 0.560133373 | 0.559807309 | 0.557689339 | 0.556831773 | 0.557842322 | 0.559993636 | 0.564502047 | 0.571474175 | 0.57940016  | 0.587724052 | 0.596314263 | 0.604349713 | 0.610658229 | 0.619774204 | 0.631898155 | 0.642160858 | 0.650806254 |             |
| Barnsley                    | 0.516494878  | 0.519431611 | 0.519795904 | 0.52124476  | 0.524049959 | 0.523531449 | 0.520648555 | 0.519043044 | 0.51925259  | 0.517957804 | 0.514811862 | 0.513079319 | 0.513562466 | 0.515272579 | 0.519648226 | 0.526826873 | 0.53530383  | 0.544264548 | 0.553486571 | 0.562032729 | 0.568601189 | 0.578412028 | 0.591509708 | 0.602492344 | 0.611557344 |             |
| Bradford                    | 0.527564932  | 0.530715588 | 0.530923589 | 0.532426004 | 0.535046265 | 0.534135369 | 0.530731518 | 0.528584148 | 0.528451017 | 0.526207171 | 0.522690055 | 0.520145644 | 0.519943312 | 0.521116561 | 0.524600739 | 0.533155729 | 0.542226238 | 0.551854642 | 0.561760575 | 0.570927862 | 0.577472492 | 0.588226692 | 0.602463378 | 0.614425332 | 0.624467008 |             |
| Cardiff                     | 0.555930196  | 0.558987743 | 0.559501757 | 0.561015598 | 0.563860189 | 0.563499754 | 0.560828437 | 0.559471614 | 0.559862578 | 0.558845519 | 0.556115117 | 0.554714728 | 0.5554444   | 0.553298466 | 0.561811571 | 0.568910692 | 0.572273668 | 0.586076204 | 0.595161542 | 0.603586829 | 0.610135201 | 0.619854427 | 0.632242503 | 0.643530733 | 0.652585981 |             |
| Doncaster                   | 0.519446004  | 0.522528016 | 0.522894511 | 0.524300187 | 0.527099199 | 0.526415581 | 0.5232395   | 0.521470291 | 0.521582704 | 0.520155789 | 0.516704663 | 0.514506331 | 0.514625248 | 0.516063729 | 0.520360753 | 0.527708701 | 0.536356727 | 0.545383229 | 0.554761271 | 0.563531028 | 0.570272208 | 0.5803157   | 0.593787087 | 0.604983998 | 0.614409581 |             |
| East Riding of Yorkshire    | 0.574029768  | 0.577272153 | 0.578269393 | 0.580262477 | 0.583400255 | 0.583834664 | 0.582555065 | 0.582621165 | 0.583461395 | 0.583497533 | 0.582260258 | 0.582140254 | 0.583495738 | 0.58575264  | 0.590353554 | 0.597076631 | 0.604647394 | 0.612602571 | 0.62078098  | 0.628415929 | 0.634518229 | 0.643037275 | 0.651465757 | 0.663737665 | 0.671801463 |             |
| Kingston upon Hull, City of | 0.518994035  | 0.521937958 | 0.522197523 | 0.523472638 | 0.526134534 | 0.52333309  | 0.522046446 | 0.520101912 | 0.520034407 | 0.518833384 | 0.514734632 | 0.51248847  | 0.512681327 | 0.514153752 | 0.518468821 | 0.525807197 | 0.534514094 | 0.543735148 | 0.553372968 | 0.562289178 | 0.562019496 | 0.569516462 | 0.59323196  | 0.604807131 | 0.614477527 |             |
| Kirkcaldy                   | 0.545290916  | 0.548399007 | 0.548971024 | 0.550416654 | 0.553309093 | 0.55101889  | 0.549827131 | 0.549482713 | 0.549057543 | 0.546509658 | 0.545135282 | 0.545714625 | 0.54575025  | 0.551955903 | 0.559236104 | 0.567617791 | 0.5765444   | 0.584539575 | 0.594004292 | 0.600495144 | 0.610143831 | 0.622963597 | 0.633653768 | 0.642692151 | 0.652391591 |             |
| Leeds                       | 0.58789355   | 0.591126165 | 0.592711154 | 0.594670674 | 0.597175984 | 0.596276825 | 0.596254201 | 0.595878122 | 0.596920053 | 0.596197531 | 0.59564434  | 0.595330663 | 0.596456363 | 0.598794274 | 0.603238765 | 0.609927539 | 0.617482333 | 0.624384949 | 0.631426663 | 0.641266663 | 0.649775999 | 0.660792621 | 0.673123264 | 0.684235337 | 0.694822533 |             |
| North East Lincolnshire     | 0.520481392  | 0.523484002 | 0.523611918 | 0.524860003 | 0.527638964 | 0.526626419 | 0.522849659 | 0.52041572  | 0.520289158 | 0.518273679 | 0.514042877 | 0.511310099 | 0.511214857 | 0.512466842 | 0.516809446 | 0.524563367 | 0.53373833  | 0.543516027 | 0.553488598 | 0.562734397 | 0.56969293  | 0.58048631  | 0.595069074 | 0.607021145 | 0.6170504   |             |
| North Lincolnshire          | 0.566127695  | 0.569355358 | 0.569856339 | 0.571442002 | 0.574347381 | 0.573894121 | 0.570887594 | 0.569196252 | 0.569417762 | 0.568084688 | 0.564979238 | 0.56291591  | 0.563384711 | 0.565085082 | 0.569523856 | 0.576687631 | 0.585482363 | 0.594564498 | 0.603931161 | 0.612353561 | 0.619116291 | 0.629021933 | 0.642390883 | 0.653266605 | 0.662443836 |             |
| North Yorkshire             | 0.59031343   | 0.593529231 | 0.594456088 | 0.596707052 | 0.599874764 | 0.600483701 | 0.599033091 | 0.599201547 | 0.600526049 | 0.600817463 | 0.598918956 | 0.59811959  | 0.601359788 | 0.603919512 | 0.608482703 | 0.610520211 | 0.622423516 | 0.630179465 | 0.638137089 | 0.646563716 | 0.651694474 | 0.660017393 | 0.670772623 | 0.679889229 | 0.687682439 |             |
| Rotherham                   | 0.52578141   | 0.530606956 | 0.531052283 | 0.532579927 | 0.535480033 | 0.535054179 | 0.532221126 | 0.530701744 | 0.530986446 | 0.529791868 | 0.526780937 | 0.52512424  | 0.52567309  | 0.527419033 | 0.531882543 | 0.539091197 | 0.547580099 | 0.556519071 | 0.565278833 | 0.574254326 | 0.580285276 | 0.590829929 | 0.603611959 | 0.614440473 | 0.62503699  |             |
| Sheffield                   | 0.58293823   | 0.585596969 | 0.586684938 | 0.588712375 | 0.591784977 | 0.592628232 | 0.591808284 | 0.590915941 | 0.591292933 | 0.593751418 | 0.592664338 | 0.590666771 | 0.59470822  | 0.597363932 | 0.602041866 | 0.608498970 | 0.615107683 | 0.622832826 | 0.63091208  | 0.637302937 | 0.643418203 | 0.651285544 | 0.66132427  | 0.669992616 | 0.677523794 |             |
| Wakefield                   | 0.532276866  | 0.53535445  | 0.535764677 | 0.537212564 | 0.540035609 | 0.53947285  | 0.536509048 | 0.53487939  | 0.535153152 | 0.533948288 | 0.53080770  | 0.528936465 | 0.529292921 | 0.530992977 | 0.535427659 | 0.543721674 | 0.55134815  | 0.560349108 | 0.569787671 | 0.578478082 | 0.585153187 | 0.59513120  | 0.608462535 | 0.619538516 | 0.628686795 |             |
| York                        | 0.62800457   | 0.631333388 | 0.632650069 | 0.634480863 | 0.63779931  | 0.639133469 | 0.638845536 | 0.639527926 | 0.640897967 | 0.641668339 | 0.641535887 | 0.642157596 | 0.643944783 | 0.646532284 | 0.65087502  | 0.656015424 | 0.663594814 | 0.67064203  | 0.67786435  | 0.684676196 | 0.690293483 | 0.697668593 | 0.707070716 | 0.713255512 | 0.72191453  |             |
| Northern Ireland            | 0.480518701  | 0.490038093 | 0.495716886 | 0.50066953  | 0.50671997  | 0.510064561 | 0.512044541 | 0.513631628 | 0.51578778  | 0.516494966 | 0.512469942 | 0.52477445  | 0.522253055 | 0.524721727 | 0.529702254 | 0.534528329 | 0.54488943  | 0.552607193 | 0.561764673 | 0.581277945 | 0.588633559 | 0.596961544 | 0.609212192 | 0.628441812 | 0.645264315 |             |
| Scotland                    | 0.57480351   | 0.58194378  | 0.582980822 | 0.58343813  | 0.58450874  | 0.584774181 | 0.58324598  | 0.582589688 | 0.583610164 | 0.584162118 | 0.585241911 | 0.586158414 | 0.58701871  | 0.58882592  | 0.593211452 | 0.600989133 | 0.606840051 | 0.612951588 | 0.620565877 | 0.628347058 | 0.633454459 | 0.649882757 | 0.651624197 | 0.65952018  | 0.66602147  |             |
| Wales                       | 0.56101374   | 0.563268233 | 0.562907385 | 0.56477253  | 0.567842093 | 0.567455725 | 0.565842093 | 0.56329217  | 0.562007903 | 0.561985536 | 0.55947716  | 0.556188373 | 0.554005952 | 0.551903853 | 0.549844277 | 0.546026565 | 0.541294941 | 0.536475313 | 0.532349847 | 0.529814078 | 0.527191456 | 0.52516066  | 0.523269913 | 0.52149971  | 0.51952061  | 0.517631819 |
| Latin America and Caribbean | 0.278069555  | 0.281540394 | 0.28464058  | 0.287260465 | 0.29030217  | 0.29374457  | 0.297446428 | 0.301438018 | 0.305188532 | 0.308851612 | 0.312706911 | 0.316792299 | 0.321391853 | 0.326487575 | 0.332141418 | 0.338214487 | 0.344566673 | 0.350993616 | 0.357327536 | 0.363517666 | 0.369739739 | 0.376042747 | 0.382599238 | 0.38984513  | 0.39669025  |             |
| Andean Latin America        | 0.289483413  | 0.293317928 | 0.296869181 | 0.300132308 | 0.303400473 | 0.306598046 | 0.309654239 | 0.312783866 | 0.315646115 | 0.318438814 | 0.321728253 | 0.325228306 | 0.329241846 | 0.333890979 | 0.339050992 | 0.344667513 | 0.351011131 | 0.357693133 | 0.363923698 | 0.369678313 | 0.375321001 | 0.381012919 | 0.387270955 | 0.394601279 | 0.402694313 |             |
| Bolivia                     | 0.24714415   | 0.250911192 | 0.253836369 | 0.25590906  | 0.25761454  | 0.260455313 | 0.26273302  | 0.264891966 | 0.267213169 | 0.269617905 | 0.272034272 | 0.27502321  | 0.278567069 | 0.282646577 | 0.286714873 | 0.291286654 | 0.296372948 | 0.30167101  | 0.306914268 | 0.312201171 | 0.317606372 | 0.323084693 | 0.328668573 | 0.334369537 | 0.340145294 |             |
| Ecuador                     | 0.321070493  | 0.324684831 | 0.328740617 | 0.332613922 | 0.336322543 | 0.338325107 | 0.339905371 | 0.341253231 | 0.342187002 | 0.342607989 | 0.343078319 | 0.343900022 | 0.345914038 | 0.349242369 | 0.354010033 | 0.360185131 | 0.368003215 | 0.376690724 | 0.383900272 | 0.389127635 | 0.393322381 | 0.397547199 | 0.403537083 | 0.41024235  | 0.423838938 |             |
| Peru                        | 0.289569533  | 0.293188664 | 0.29603138  | 0.299142977 | 0.30341118  | 0.307150601 | 0.310939602 | 0.315045432 | 0.318989421 | 0.322948997 | 0.327250471 | 0.332405353 | 0.337220126 | 0.342334434 | 0.3474848   | 0.353021166 | 0.358888914 | 0.364877475 | 0.370528722 | 0.376750574 | 0.38305515  | 0.389451606 | 0.396014749 | 0.40261280  | 0.41025886  |             |
| Caribbean                   | 0.323185331  | 0.328312818 | 0.331320818 | 0.334236024 | 0.337278154 | 0.338273854 | 0.337490864 | 0.337287754 | 0.338267399 | 0.337947908 | 0.336923098 | 0.336049251 | 0.334140002 | 0.332761009 | 0.331561958 | 0.330652088 | 0.328849592 | 0.328021258 | 0.328502529 | 0.328869714 | 0.329386653 | 0.329912847 | 0.408428996 | 0.414787409 | 0.421874709 |             |
| Antigua and Barbuda         | 0.331150382  | 0.333904393 | 0.33445288  | 0.333731314 | 0.332094002 | 0.331833565 | 0.33358559  | 0.341764261 | 0.348752979 | 0.356987184 | 0.366510563 | 0.376075119 | 0.384914589 | 0.393796363 | 0.403752778 | 0.414143    | 0.424371686 | 0.435206858 | 0.44717906  | 0.458707983 | 0.469010458 | 0.479635714 | 0.49005921  | 0.498396773 | 0.510878161 |             |
| The Bahamas                 | 0.47868588   | 0.47962534  | 0.478718821 | 0.47821729  | 0.4843      |             |             |             |             |             |             |             |             |             |             |             |             |             |             |             |             |             |             |             |             |             |

|                                 |             |             |             |             |             |             |             |             |             |             |              |             |             |              |             |             |              |             |             |             |             |              |             |             |             |
|---------------------------------|-------------|-------------|-------------|-------------|-------------|-------------|-------------|-------------|-------------|-------------|--------------|-------------|-------------|--------------|-------------|-------------|--------------|-------------|-------------|-------------|-------------|--------------|-------------|-------------|-------------|
| Michoacan de Ocampo             | 0.23494096  | 0.23741748  | 0.23929989  | 0.24039355  | 0.24190706  | 0.24379572  | 0.24603890  | 0.24871162  | 0.25150059  | 0.25421943  | 0.25699193   | 0.25948894  | 0.26204808  | 0.26529858   | 0.26980074  | 0.27272732  | 0.27631636   | 0.28017428  | 0.28436132  | 0.28848929  | 0.29251727  | 0.29627528   | 0.30113749  | 0.30748933  | 0.31491789  |
| Moroles                         | 0.262972185 | 0.26899983  | 0.29281639  | 0.29483129  | 0.29666565  | 0.29948575  | 0.30267306  | 0.31023486  | 0.31042303  | 0.31769629  | 0.32107802   | 0.32454734  | 0.32849405  | 0.33274286   | 0.33760588  | 0.34308290  | 0.34917006   | 0.35587532  | 0.36320035  | 0.37115441  | 0.37969257  | 0.38884262   | 0.39852976  | 0.40876339  | 0.41953254  |
| Nayarit                         | 0.23980889  | 0.242134209 | 0.24378107  | 0.24454134  | 0.245444578 | 0.247431610 | 0.24956723  | 0.25229184  | 0.25520119  | 0.25810763  | 0.261047539  | 0.263766456 | 0.26658694  | 0.269947148  | 0.27366660  | 0.27746262  | 0.28139073   | 0.28545893  | 0.29067179  | 0.29604322  | 0.30157934  | 0.30729556   | 0.31319700  | 0.31928892  | 0.32557310  |
| Nuevo Leon                      | 0.321979885 | 0.325216248 | 0.327791515 | 0.329204589 | 0.33114165  | 0.33399954  | 0.33646195  | 0.33972776  | 0.34360530  | 0.34725808  | 0.35100487   | 0.35486103  | 0.35884558  | 0.363141907  | 0.367929723 | 0.373520542 | 0.38123226   | 0.387686195 | 0.39509323  | 0.40230197  | 0.409247267 | 0.415839904  | 0.423790478 | 0.43139054  | 0.44042471  |
| Oaxaca                          | 0.23170455  | 0.23387889  | 0.235880913 | 0.236638429 | 0.238193456 | 0.240125733 | 0.24236942  | 0.24499642  | 0.24770249  | 0.25063812  | 0.25429406   | 0.25824944  | 0.259719734 | 0.262553993  | 0.266308707 | 0.265687201 | 0.268194255  | 0.270877674 | 0.273730731 | 0.276496858 | 0.27910663  | 0.281460587  | 0.284818593 | 0.289848256 | 0.295100753 |
| Puebla                          | 0.25349702  | 0.25588741  | 0.25774606  | 0.258772528 | 0.260379965 | 0.26240397  | 0.264716323 | 0.267456489 | 0.270240047 | 0.272870170 | 0.275454277  | 0.277654891 | 0.279793906 | 0.28232362   | 0.28505073  | 0.28743798  | 0.289679733  | 0.292258697 | 0.295492919 | 0.298947325 | 0.30248136  | 0.305165925  | 0.30923079  | 0.31486754  | 0.321673804 |
| Quintana Roo                    | 0.257773016 | 0.260994798 | 0.263544286 | 0.26540511  | 0.267633776 | 0.270633776 | 0.274834682 | 0.281914009 | 0.285962924 | 0.29066607  | 0.2933931591 | 0.297871699 | 0.302386331 | 0.30723639   | 0.311757331 | 0.316508193 | 0.321921397  | 0.328492935 | 0.334911756 | 0.342429667 | 0.349452222 | 0.357141376  | 0.365429967 | 0.373378623 | 0.381386523 |
| Quintana Roo                    | 0.255445354 | 0.25788789  | 0.259566308 | 0.260350328 | 0.261533894 | 0.263359754 | 0.266615283 | 0.268394581 | 0.271373531 | 0.274286453 | 0.277106865  | 0.279469016 | 0.281831959 | 0.28480653   | 0.288606783 | 0.290990701 | 0.293801177  | 0.29721325  | 0.301615665 | 0.306419429 | 0.311046206 | 0.31559073   | 0.320378862 | 0.327978012 | 0.336271844 |
| San Luis Potosi                 | 0.248630425 | 0.25185389  | 0.253124159 | 0.254292919 | 0.25592781  | 0.258020416 | 0.260421965 | 0.26257262  | 0.266210127 | 0.26900021  | 0.271784701  | 0.274212694 | 0.27653113  | 0.278959662  | 0.281387676 | 0.283848504 | 0.28565182   | 0.28841772  | 0.29176132  | 0.295135421 | 0.298488215 | 0.301701919  | 0.30631988  | 0.312575407 | 0.320539931 |
| Sinaloa                         | 0.26568203  | 0.26811737  | 0.269813425 | 0.270586341 | 0.271809798 | 0.273455979 | 0.275566778 | 0.278181844 | 0.280941914 | 0.283637032 | 0.286393974  | 0.288880884 | 0.291508768 | 0.29446577   | 0.298956886 | 0.302938505 | 0.307123435  | 0.311760765 | 0.316857586 | 0.322032939 | 0.327219007 | 0.332484807  | 0.33988377  | 0.348589654 | 0.359119931 |
| Sonora                          | 0.213086942 | 0.21342507  | 0.21682423  | 0.21838274  | 0.219340782 | 0.22288606  | 0.3282125   | 0.329293533 | 0.332923863 | 0.336293208 | 0.34066601   | 0.344303231 | 0.348191714 | 0.352506178  | 0.35711761  | 0.361844166 | 0.36694046   | 0.372488867 | 0.37840635  | 0.384284805 | 0.38999995  | 0.3954728    | 0.402052599 | 0.410423291 | 0.419634663 |
| Tabasco                         | 0.239524    | 0.24206599  | 0.24376155  | 0.244519398 | 0.247348875 | 0.249415143 | 0.25204097  | 0.254839973 | 0.2576195   | 0.260210231 | 0.26244820   | 0.264850126 | 0.26815844  | 0.27208241   | 0.275941375 | 0.27975789  | 0.28491139   | 0.28880576  | 0.29340222  | 0.297636035 | 0.301375488 | 0.306174046  | 0.312434727 | 0.31969526  | 0.327662895 |
| Tampulipas                      | 0.305630087 | 0.307557189 | 0.311103863 | 0.313824568 | 0.314569087 | 0.316782015 | 0.319594225 | 0.32292705  | 0.326369068 | 0.329671362 | 0.33399641   | 0.339652884 | 0.34667022  | 0.3540034031 | 0.354024095 | 0.354024095 | 0.354024095  | 0.354024095 | 0.354024095 | 0.354024095 | 0.354024095 | 0.354024095  | 0.354024095 | 0.354024095 | 0.354024095 |
| Thlaxcala                       | 0.234268681 | 0.23666685  | 0.238404372 | 0.239247105 | 0.240659752 | 0.242563842 | 0.244861998 | 0.247638416 | 0.250519847 | 0.253129166 | 0.256172592  | 0.258769904 | 0.261425437 | 0.26441488   | 0.26819162  | 0.271475659 | 0.274817169  | 0.278646594 | 0.283146163 | 0.28788776  | 0.292858826 | 0.296982974  | 0.302677247 | 0.310182456 | 0.319034224 |
| Veracruz de Ignacio de la Llave | 0.269066117 | 0.272509639 | 0.274791107 | 0.276278266 | 0.2782438   | 0.280640999 | 0.283881211 | 0.286576011 | 0.289853585 | 0.292997258 | 0.296041582  | 0.298627334 | 0.301367688 | 0.304315399  | 0.30800582  | 0.31124091  | 0.314349669  | 0.317561167 | 0.320848522 | 0.323988604 | 0.326957166 | 0.329657481  | 0.333336295 | 0.338413095 | 0.34469108  |
| Yucatán                         | 0.295982291 | 0.29868588  | 0.300609594 | 0.301823852 | 0.303472931 | 0.305489448 | 0.307451943 | 0.31034736  | 0.312968396 | 0.31533661  | 0.31775986   | 0.319304283 | 0.320973915 | 0.32304477   | 0.325392723 | 0.32788871  | 0.329802653  | 0.330910509 | 0.332331536 | 0.336537544 | 0.338304150 | 0.340951006  | 0.344622762 | 0.350116286 | 0.357069001 |
| Zacatecas                       | 0.239760425 | 0.241961478 | 0.243458104 | 0.244027223 | 0.244984549 | 0.246424277 | 0.248229923 | 0.25051869  | 0.252920609 | 0.255203281 | 0.257490302  | 0.259470796 | 0.261309535 | 0.263999212  | 0.266671213 | 0.26935813  | 0.272198564  | 0.275254152 | 0.279326579 | 0.283257904 | 0.287330339 | 0.291307342  | 0.29604585  | 0.304830235 | 0.31456414  |
| Nicaragua                       | 0.21197197  | 0.214098279 | 0.21632216  | 0.21825847  | 0.218878588 | 0.219860775 | 0.220367132 | 0.22091106  | 0.221519227 | 0.221404653 | 0.221404653  | 0.221404653 | 0.221404653 | 0.221404653  | 0.221404653 | 0.221404653 | 0.221404653  | 0.221404653 | 0.221404653 | 0.221404653 | 0.221404653 | 0.221404653  | 0.221404653 | 0.221404653 | 0.221404653 |
| Panamá                          | 0.340534201 | 0.342344534 | 0.32130165  | 0.321089965 | 0.30786483  | 0.308233394 | 0.31082141  | 0.313956895 | 0.316670184 | 0.318154537 | 0.31656291   | 0.315029413 | 0.318452331 | 0.327584953  | 0.320254272 | 0.325797309 | 0.357436674  | 0.363849056 | 0.379210326 | 0.389105421 | 0.400993299 | 0.414491261  | 0.426782148 | 0.439185888 | 0.452886555 |
| Venezuela                       | 0.322694559 | 0.323285559 | 0.323997405 | 0.324115127 | 0.32635479  | 0.330050499 | 0.332591039 | 0.332051934 | 0.328990009 | 0.32605391  | 0.327438809  | 0.33342267  | 0.341373766 | 0.350023203  | 0.359367041 | 0.368657077 | 0.376999952  | 0.385357965 | 0.394041753 | 0.404649422 | 0.418174574 | 0.430010054  | 0.439262065 | 0.446521322 | 0.452886555 |
| Tropical Latin America          | 0.253906836 | 0.257468883 | 0.261502901 | 0.26548106  | 0.270059178 | 0.274998412 | 0.280140666 | 0.28554288  | 0.291198197 | 0.296061893 | 0.302699523  | 0.308918193 | 0.314554962 | 0.320301472  | 0.326092494 | 0.332042764 | 0.338252276  | 0.344607153 | 0.351186984 | 0.357801144 | 0.364621227 | 0.371269353  | 0.378934524 | 0.386498923 | 0.394406200 |
| Brasil                          | 0.25289899  | 0.256431533 | 0.26049808  | 0.265450294 | 0.269721812 | 0.274021219 | 0.27914297  | 0.28460689  | 0.290258684 | 0.29620161  | 0.301852622  | 0.307488137 | 0.31398396  | 0.319560247  | 0.32593333  | 0.331939346 | 0.337652553  | 0.34402510  | 0.350689289 | 0.357349349 | 0.364232066 | 0.371287192  | 0.378643250 | 0.386254198 | 0.394818165 |
| Acre                            | 0.152603938 | 0.154102963 | 0.15672824  | 0.15993731  | 0.161824836 | 0.164878935 | 0.167196013 | 0.171690935 | 0.174610313 | 0.178393306 | 0.183160323  | 0.187996331 | 0.193806109 | 0.199753619  | 0.205420096 | 0.209695335 | 0.214403041  | 0.219640512 | 0.225461522 | 0.231897255 | 0.238962109 | 0.246682219  | 0.255039354 | 0.264189453 | 0.274272600 |
| Alagoas                         | 0.154370437 | 0.156249388 | 0.158638715 | 0.161073397 | 0.163396833 | 0.167328894 | 0.17002118  | 0.174833927 | 0.179074698 | 0.183189361 | 0.18796553   | 0.192386338 | 0.197116919 | 0.201832899  | 0.20648732  | 0.210973146 | 0.215300957  | 0.219841298 | 0.224516475 | 0.229012676 | 0.233732414 | 0.238813003  | 0.244189778 | 0.249718071 | 0.254701588 |
| Amapá                           | 0.21000777  | 0.21236063  | 0.215394118 | 0.218612014 | 0.22245532  | 0.226746306 | 0.231280064 | 0.236173317 | 0.241328904 | 0.246407417 | 0.25141698   | 0.256237599 | 0.26143294  | 0.266217971  | 0.271261252 | 0.276290995 | 0.281253795  | 0.287002428 | 0.292739830 | 0.300299085 | 0.307021988 | 0.314175229  | 0.321073281 | 0.328414059 | 0.337273674 |
| Amazonas                        | 0.211220104 | 0.213885705 | 0.217081783 | 0.220410673 | 0.224282267 | 0.228614596 | 0.23325079  | 0.238260847 | 0.243541784 | 0.248824074 | 0.254163668  | 0.260070536 | 0.26656231  | 0.268475427  | 0.2724635   | 0.27661391  | 0.28069387   | 0.285026057 | 0.289661859 | 0.294474759 | 0.299619343 | 0.305429493  | 0.311951704 | 0.319084874 | 0.332520762 |
| Bahia                           | 0.174727332 | 0.176832664 | 0.179386737 | 0.181928198 | 0.184902367 | 0.188312399 | 0.191909353 | 0.19842156  | 0.200043365 | 0.204399097 | 0.208628708  | 0.212228775 | 0.215859901 | 0.21918611   | 0.223430322 | 0.227945199 | 0.232744728  | 0.237575239 | 0.242516097 | 0.247348111 | 0.252487863 | 0.257993642  | 0.263901611 | 0.270242821 | 0.275941867 |
| Ceará                           | 0.15741051  | 0.178089794 | 0.180945747 | 0.183735609 | 0.186964367 | 0.190532058 | 0.194189953 | 0.198195338 | 0.202479566 | 0.206895261 | 0.21149197   | 0.216999269 | 0.2215913   | 0.226661121  | 0.232808286 | 0.237449871 | 0.242173327  | 0.248193254 | 0.254983592 | 0.257381619 | 0.256919651 | 0.260725029  | 0.265112134 | 0.269477022 | 0.274218627 |
| Distrito Federal                | 0.23146312  | 0.230546623 | 0.235842782 | 0.236999141 | 0.236806088 | 0.237426739 | 0.238140256 | 0.238436433 | 0.239401508 | 0.240869519 | 0.245424413  | 0.242250762 | 0.241485373 | 0.243497458  | 0.246793852 | 0.246580046 | 0.2461462214 | 0.246617233 | 0.247191057 | 0.247800663 | 0.248329713 | 0.2488042159 | 0.249188167 | 0.249382025 | 0.249481259 |
| Espirito Santo                  | 0.219409297 | 0.221247519 | 0.22592821  | 0.229440091 | 0.233441459 | 0.237861882 | 0.242426341 | 0.24734212  | 0.252603586 | 0.258057748 | 0.26388331   | 0.268965905 | 0.274611025 | 0.280599678  | 0.286000779 | 0.291885572 | 0.30328421   | 0.316808164 | 0.318275748 | 0.325692513 | 0.333012916 | 0.340418378  | 0.347987777 | 0.355011165 | 0.361116755 |
| Goiás                           | 0.170495075 | 0.172982166 | 0.176255582 | 0.179393786 | 0.183148193 | 0.187449067 | 0.191817966 | 0.196641155 | 0.201813522 | 0.207129267 | 0.212692     |             |             |              |             |             |              |             |             |             |             |              |             |             |             |

|            |             |             |            |             |             |            |            |             |            |             |             |             |             |             |             |             |             |            |             |            |             |             |             |             |             |             |             |             |             |             |             |             |             |             |             |             |             |             |             |             |             |             |             |             |             |             |             |             |             |             |             |             |             |             |             |             |             |             |             |             |             |             |             |             |             |             |             |             |             |             |             |             |             |             |             |             |             |             |             |             |             |             |             |             |             |             |             |             |             |             |             |             |             |             |             |             |             |             |             |             |             |             |             |             |             |             |             |             |             |             |             |             |             |             |             |             |             |             |             |             |             |             |             |             |             |             |             |             |             |             |             |             |             |             |             |             |             |             |             |             |             |             |             |             |             |             |             |             |             |             |             |             |             |             |             |             |             |             |             |             |             |             |             |             |             |             |             |             |             |             |             |             |             |             |             |             |             |             |             |             |             |             |             |             |             |             |             |             |             |             |             |             |             |             |             |             |             |             |             |             |             |             |             |             |             |             |             |             |             |             |             |             |             |             |             |             |             |             |             |             |             |             |             |             |             |             |             |             |             |             |             |             |             |             |             |             |             |             |             |             |             |             |             |             |             |             |             |             |             |             |             |             |             |             |             |             |             |             |             |             |             |             |             |             |             |             |             |             |             |             |             |             |             |             |             |             |             |             |             |             |             |             |             |             |             |             |             |             |             |             |             |             |             |             |             |             |             |             |             |             |             |             |             |             |             |             |             |             |             |             |             |             |             |             |             |             |             |             |             |             |             |             |             |             |             |             |             |             |             |             |             |             |             |             |             |             |             |             |             |             |             |             |             |             |             |             |             |             |             |             |             |             |             |             |             |             |             |             |             |             |             |             |             |             |             |             |             |             |             |             |             |             |             |             |             |             |             |             |             |             |             |             |             |             |             |             |             |             |             |             |             |             |             |             |             |             |             |             |             |             |             |             |             |             |             |             |             |             |             |             |             |             |             |             |             |             |             |             |             |             |             |             |             |             |             |             |             |             |             |             |             |             |             |             |             |             |             |             |             |             |             |             |             |             |             |             |             |             |             |             |             |             |             |             |             |             |             |             |             |             |             |             |             |             |             |             |             |             |             |             |             |             |             |             |             |             |             |             |             |             |             |             |             |             |             |             |             |             |             |             |             |             |             |             |             |             |             |             |             |             |             |             |             |             |             |             |             |             |             |             |             |             |             |             |             |             |             |             |             |             |             |             |             |             |             |             |             |             |             |             |             |             |             |             |             |             |             |             |             |             |             |             |             |             |             |             |             |             |             |             |             |             |             |             |             |             |             |             |             |             |             |             |             |             |             |             |             |             |             |             |             |             |             |             |             |             |             |             |             |             |             |             |             |             |             |             |             |             |             |             |             |             |             |             |             |             |             |             |             |             |             |             |             |             |             |             |             |             |             |             |             |             |             |             |             |             |             |             |             |             |             |             |             |             |             |             |             |             |             |             |             |             |             |             |             |             |             |             |             |             |             |             |             |             |             |             |             |             |             |             |             |             |             |             |             |             |             |             |             |             |             |             |             |             |             |             |             |             |             |             |             |             |             |             |             |             |             |             |             |             |             |             |             |             |             |             |             |             |             |             |             |             |             |             |             |             |             |             |             |             |             |             |             |             |             |             |             |             |             |             |             |             |             |             |             |             |             |             |             |             |             |             |             |             |             |             |             |             |             |             |             |             |             |             |             |             |             |             |             |             |             |             |             |             |             |             |             |             |             |             |             |             |             |             |             |             |             |             |             |             |             |             |             |             |             |             |             |             |             |             |             |          |
|------------|-------------|-------------|------------|-------------|-------------|------------|------------|-------------|------------|-------------|-------------|-------------|-------------|-------------|-------------|-------------|-------------|------------|-------------|------------|-------------|-------------|-------------|-------------|-------------|-------------|-------------|-------------|-------------|-------------|-------------|-------------|-------------|-------------|-------------|-------------|-------------|-------------|-------------|-------------|-------------|-------------|-------------|-------------|-------------|-------------|-------------|-------------|-------------|-------------|-------------|-------------|-------------|-------------|-------------|-------------|-------------|-------------|-------------|-------------|-------------|-------------|-------------|-------------|-------------|-------------|-------------|-------------|-------------|-------------|-------------|-------------|-------------|-------------|-------------|-------------|-------------|-------------|-------------|-------------|-------------|-------------|-------------|-------------|-------------|-------------|-------------|-------------|-------------|-------------|-------------|-------------|-------------|-------------|-------------|-------------|-------------|-------------|-------------|-------------|-------------|-------------|-------------|-------------|-------------|-------------|-------------|-------------|-------------|-------------|-------------|-------------|-------------|-------------|-------------|-------------|-------------|-------------|-------------|-------------|-------------|-------------|-------------|-------------|-------------|-------------|-------------|-------------|-------------|-------------|-------------|-------------|-------------|-------------|-------------|-------------|-------------|-------------|-------------|-------------|-------------|-------------|-------------|-------------|-------------|-------------|-------------|-------------|-------------|-------------|-------------|-------------|-------------|-------------|-------------|-------------|-------------|-------------|-------------|-------------|-------------|-------------|-------------|-------------|-------------|-------------|-------------|-------------|-------------|-------------|-------------|-------------|-------------|-------------|-------------|-------------|-------------|-------------|-------------|-------------|-------------|-------------|-------------|-------------|-------------|-------------|-------------|-------------|-------------|-------------|-------------|-------------|-------------|-------------|-------------|-------------|-------------|-------------|-------------|-------------|-------------|-------------|-------------|-------------|-------------|-------------|-------------|-------------|-------------|-------------|-------------|-------------|-------------|-------------|-------------|-------------|-------------|-------------|-------------|-------------|-------------|-------------|-------------|-------------|-------------|-------------|-------------|-------------|-------------|-------------|-------------|-------------|-------------|-------------|-------------|-------------|-------------|-------------|-------------|-------------|-------------|-------------|-------------|-------------|-------------|-------------|-------------|-------------|-------------|-------------|-------------|-------------|-------------|-------------|-------------|-------------|-------------|-------------|-------------|-------------|-------------|-------------|-------------|-------------|-------------|-------------|-------------|-------------|-------------|-------------|-------------|-------------|-------------|-------------|-------------|-------------|-------------|-------------|-------------|-------------|-------------|-------------|-------------|-------------|-------------|-------------|-------------|-------------|-------------|-------------|-------------|-------------|-------------|-------------|-------------|-------------|-------------|-------------|-------------|-------------|-------------|-------------|-------------|-------------|-------------|-------------|-------------|-------------|-------------|-------------|-------------|-------------|-------------|-------------|-------------|-------------|-------------|-------------|-------------|-------------|-------------|-------------|-------------|-------------|-------------|-------------|-------------|-------------|-------------|-------------|-------------|-------------|-------------|-------------|-------------|-------------|-------------|-------------|-------------|-------------|-------------|-------------|-------------|-------------|-------------|-------------|-------------|-------------|-------------|-------------|-------------|-------------|-------------|-------------|-------------|-------------|-------------|-------------|-------------|-------------|-------------|-------------|-------------|-------------|-------------|-------------|-------------|-------------|-------------|-------------|-------------|-------------|-------------|-------------|-------------|-------------|-------------|-------------|-------------|-------------|-------------|-------------|-------------|-------------|-------------|-------------|-------------|-------------|-------------|-------------|-------------|-------------|-------------|-------------|-------------|-------------|-------------|-------------|-------------|-------------|-------------|-------------|-------------|-------------|-------------|-------------|-------------|-------------|-------------|-------------|-------------|-------------|-------------|-------------|-------------|-------------|-------------|-------------|-------------|-------------|-------------|-------------|-------------|-------------|-------------|-------------|-------------|-------------|-------------|-------------|-------------|-------------|-------------|-------------|-------------|-------------|-------------|-------------|-------------|-------------|-------------|-------------|-------------|-------------|-------------|-------------|-------------|-------------|-------------|-------------|-------------|-------------|-------------|-------------|-------------|-------------|-------------|-------------|-------------|-------------|-------------|-------------|-------------|-------------|-------------|-------------|-------------|-------------|-------------|-------------|-------------|-------------|-------------|-------------|-------------|-------------|-------------|-------------|-------------|-------------|-------------|-------------|-------------|-------------|-------------|-------------|-------------|-------------|-------------|-------------|-------------|-------------|-------------|-------------|-------------|-------------|-------------|-------------|-------------|-------------|-------------|-------------|-------------|-------------|-------------|-------------|-------------|-------------|-------------|-------------|-------------|-------------|-------------|-------------|-------------|-------------|-------------|-------------|-------------|-------------|-------------|-------------|-------------|-------------|-------------|-------------|-------------|-------------|-------------|-------------|-------------|-------------|-------------|-------------|-------------|-------------|-------------|-------------|-------------|-------------|-------------|-------------|-------------|-------------|-------------|-------------|-------------|-------------|-------------|-------------|-------------|-------------|-------------|-------------|-------------|-------------|-------------|-------------|-------------|-------------|-------------|-------------|-------------|-------------|-------------|-------------|-------------|-------------|-------------|-------------|-------------|-------------|-------------|-------------|-------------|-------------|-------------|-------------|-------------|-------------|-------------|-------------|-------------|-------------|-------------|-------------|-------------|-------------|-------------|-------------|-------------|-------------|-------------|-------------|-------------|-------------|-------------|-------------|-------------|-------------|-------------|-------------|-------------|-------------|-------------|-------------|-------------|-------------|-------------|-------------|-------------|-------------|-------------|-------------|-------------|-------------|-------------|-------------|-------------|-------------|-------------|-------------|-------------|-------------|-------------|-------------|-------------|-------------|-------------|-------------|-------------|-------------|-------------|-------------|-------------|-------------|-------------|-------------|-------------|-------------|-------------|-------------|-------------|-------------|-------------|-------------|-------------|-------------|-------------|-------------|-------------|-------------|-------------|-------------|-------------|-------------|-------------|-------------|-------------|-------------|-------------|-------------|-------------|-------------|-------------|-------------|-------------|-------------|-------------|-------------|-------------|-------------|-------------|-------------|-------------|-------------|-------------|-------------|-------------|-------------|-------------|-------------|-------------|-------------|-------------|-------------|-------------|-------------|-------------|-------------|-------------|-------------|-------------|-------------|-------------|-------------|-------------|-------------|-------------|-------------|-------------|-------------|-------------|-------------|-------------|-------------|-------------|-------------|-------------|-------------|-------------|-------------|-------------|-------------|-------------|-------------|-------------|-------------|-------------|-------------|-------------|-------------|-------------|-------------|-------------|-------------|-------------|-------------|-------------|-------------|-------------|-------------|-------------|-------------|-------------|-------------|-------------|-------------|-------------|-------------|-------------|-------------|-------------|-------------|-------------|-------------|-------------|-------------|-------------|-------------|-------------|-------------|-------------|-------------|-------------|-------------|-------------|-------------|-------------|-------------|-------------|-------------|-------------|-------------|-------------|-------------|-------------|-------------|-------------|-------------|-------------|----------|
| Kermanshah | 0.141566871 | 0.143639916 | 0.14522189 | 0.148314921 | 0.150828705 | 0.15350970 | 0.15620301 | 0.160334939 | 0.16440307 | 0.168616474 | 0.172698904 | 0.176466116 | 0.179110132 | 0.179736652 | 0.181142031 | 0.183960062 | 0.182041381 | 0.18164404 | 0.182237549 | 0.18294970 | 0.184690071 | 0.186565005 | 0.188549852 | 0.190544786 | 0.192549720 | 0.194554654 | 0.196559588 | 0.198564522 | 0.200569456 | 0.202574390 | 0.204579324 | 0.206584258 | 0.208589192 | 0.210594126 | 0.212599060 | 0.214603994 | 0.216608928 | 0.218613862 | 0.220618796 | 0.222623730 | 0.224628664 | 0.226633598 | 0.228638532 | 0.230643466 | 0.232648400 | 0.234653334 | 0.236658268 | 0.238663202 | 0.240668136 | 0.242673070 | 0.244678004 | 0.246682938 | 0.248687872 | 0.250692806 | 0.252697740 | 0.254697674 | 0.256702608 | 0.258707542 | 0.260712476 | 0.262717410 | 0.264722344 | 0.266727278 | 0.268732212 | 0.270737146 | 0.272742080 | 0.274747014 | 0.276751948 | 0.278756882 | 0.280761816 | 0.282766750 | 0.284771684 | 0.286776618 | 0.288781552 | 0.290786486 | 0.292791420 | 0.294796354 | 0.296796288 | 0.298796222 | 0.300796156 | 0.302796090 | 0.304796024 | 0.306795958 | 0.308795892 | 0.310795826 | 0.312795760 | 0.314795694 | 0.316795628 | 0.318795562 | 0.320795496 | 0.322795430 | 0.324795364 | 0.326795298 | 0.328795232 | 0.330795166 | 0.332795100 | 0.334795034 | 0.336794968 | 0.338794902 | 0.340794836 | 0.342794770 | 0.344794704 | 0.346794638 | 0.348794572 | 0.350794506 | 0.352794440 | 0.354794374 | 0.356794308 | 0.358794242 | 0.360794176 | 0.362794110 | 0.364794044 | 0.366793978 | 0.368793912 | 0.370793846 | 0.372793780 | 0.374793714 | 0.376793648 | 0.378793582 | 0.380793516 | 0.382793450 | 0.384793384 | 0.386793318 | 0.388793252 | 0.390793186 | 0.392793120 | 0.394793054 | 0.396792988 | 0.398792922 | 0.400792856 | 0.402792790 | 0.404792724 | 0.406792658 | 0.408792592 | 0.410792526 | 0.412792460 | 0.414792394 | 0.416792328 | 0.418792262 | 0.420792196 | 0.422792130 | 0.424792064 | 0.426792000 | 0.428791934 | 0.430791868 | 0.432791802 | 0.434791736 | 0.436791670 | 0.438791604 | 0.440791538 | 0.442791472 | 0.444791406 | 0.446791340 | 0.448791274 | 0.450791208 | 0.452791142 | 0.454791076 | 0.456791010 | 0.458790944 | 0.460790878 | 0.462790812 | 0.464790746 | 0.466790680 | 0.468790614 | 0.470790548 | 0.472790482 | 0.474790416 | 0.476790350 | 0.478790284 | 0.480790218 | 0.482790152 | 0.484790086 | 0.486790020 | 0.488790000 | 0.490790000 | 0.492790000 | 0.494790000 | 0.496790000 | 0.498790000 | 0.500790000 | 0.502790000 | 0.504790000 | 0.506790000 | 0.508790000 | 0.510790000 | 0.512790000 | 0.514790000 | 0.516790000 | 0.518790000 | 0.520790000 | 0.522790000 | 0.524790000 | 0.526790000 | 0.528790000 | 0.530790000 | 0.532790000 | 0.534790000 | 0.536790000 | 0.538790000 | 0.540790000 | 0.542790000 | 0.544790000 | 0.546790000 | 0.548790000 | 0.550790000 | 0.552790000 | 0.554790000 | 0.556790000 | 0.558790000 | 0.560790000 | 0.562790000 | 0.564790000 | 0.566790000 | 0.568790000 | 0.570790000 | 0.572790000 | 0.574790000 | 0.576790000 | 0.578790000 | 0.580790000 | 0.582790000 | 0.584790000 | 0.586790000 | 0.588790000 | 0.590790000 | 0.592790000 | 0.594790000 | 0.596790000 | 0.598790000 | 0.600790000 | 0.602790000 | 0.604790000 | 0.606790000 | 0.608790000 | 0.610790000 | 0.612790000 | 0.614790000 | 0.616790000 | 0.618790000 | 0.620790000 | 0.622790000 | 0.624790000 | 0.626790000 | 0.628790000 | 0.630790000 | 0.632790000 | 0.634790000 | 0.636790000 | 0.638790000 | 0.640790000 | 0.642790000 | 0.644790000 | 0.646790000 | 0.648790000 | 0.650790000 | 0.652790000 | 0.654790000 | 0.656790000 | 0.658790000 | 0.660790000 | 0.662790000 | 0.664790000 | 0.666790000 | 0.668790000 | 0.670790000 | 0.672790000 | 0.674790000 | 0.676790000 | 0.678790000 | 0.680790000 | 0.682790000 | 0.684790000 | 0.686790000 | 0.688790000 | 0.690790000 | 0.692790000 | 0.694790000 | 0.696790000 | 0.698790000 | 0.700790000 | 0.702790000 | 0.704790000 | 0.706790000 | 0.708790000 | 0.710790000 | 0.712790000 | 0.714790000 | 0.716790000 | 0.718790000 | 0.720790000 | 0.722790000 | 0.724790000 | 0.726790000 | 0.728790000 | 0.730790000 | 0.732790000 | 0.734790000 | 0.736790000 | 0.738790000 | 0.740790000 | 0.742790000 | 0.744790000 | 0.746790000 | 0.748790000 | 0.750790000 | 0.752790000 | 0.754790000 | 0.756790000 | 0.758790000 | 0.760790000 | 0.762790000 | 0.764790000 | 0.766790000 | 0.768790000 | 0.770790000 | 0.772790000 | 0.774790000 | 0.776790000 | 0.778790000 | 0.780790000 | 0.782790000 | 0.784790000 | 0.786790000 | 0.788790000 | 0.790790000 | 0.792790000 | 0.794790000 | 0.796790000 | 0.798790000 | 0.800790000 | 0.802790000 | 0.804790000 | 0.806790000 | 0.808790000 | 0.810790000 | 0.812790000 | 0.814790000 | 0.816790000 | 0.818790000 | 0.820790000 | 0.822790000 | 0.824790000 | 0.826790000 | 0.828790000 | 0.830790000 | 0.832790000 | 0.834790000 | 0.836790000 | 0.838790000 | 0.840790000 | 0.842790000 | 0.844790000 | 0.846790000 | 0.848790000 | 0.850790000 | 0.852790000 | 0.854790000 | 0.856790000 | 0.858790000 | 0.860790000 | 0.862790000 | 0.864790000 | 0.866790000 | 0.868790000 | 0.870790000 | 0.872790000 | 0.874790000 | 0.876790000 | 0.878790000 | 0.880790000 | 0.882790000 | 0.884790000 | 0.886790000 | 0.888790000 | 0.890790000 | 0.892790000 | 0.894790000 | 0.896790000 | 0.898790000 | 0.900790000 | 0.902790000 | 0.904790000 | 0.906790000 | 0.908790000 | 0.910790000 | 0.912790000 | 0.914790000 | 0.916790000 | 0.918790000 | 0.920790000 | 0.922790000 | 0.924790000 | 0.926790000 | 0.928790000 | 0.930790000 | 0.932790000 | 0.934790000 | 0.936790000 | 0.938790000 | 0.940790000 | 0.942790000 | 0.944790000 | 0.946790000 | 0.948790000 | 0.950790000 | 0.952790000 | 0.954790000 | 0.956790000 | 0.958790000 | 0.960790000 | 0.962790000 | 0.964790000 | 0.966790000 | 0.968790000 | 0.970790000 | 0.972790000 | 0.974790000 | 0.976790000 | 0.978790000 | 0.980790000 | 0.982790000 | 0.984790000 | 0.986790000 | 0.988790000 | 0.990790000 | 0.992790000 | 0.994790000 | 0.996790000 | 0.998790000 | 1.000790000 | 1.002790000 | 1.004790000 | 1.006790000 | 1.008790000 | 1.010790000 | 1.012790000 | 1.014790000 | 1.016790000 | 1.018790000 | 1.020790000 | 1.022790000 | 1.024790000 | 1.026790000 | 1.028790000 | 1.030790000 | 1.032790000 | 1.034790000 | 1.036790000 | 1.038790000 | 1.040790000 | 1.042790000 | 1.044790000 | 1.046790000 | 1.048790000 | 1.050790000 | 1.052790000 | 1.054790000 | 1.056790000 | 1.058790000 | 1.060790000 | 1.062790000 | 1.064790000 | 1.066790000 | 1.068790000 | 1.070790000 | 1.072790000 | 1.074790000 | 1.076790000 | 1.078790000 | 1.080790000 | 1.082790000 | 1.084790000 | 1.086790000 | 1.088790000 | 1.090790000 | 1.092790000 | 1.094790000 | 1.096790000 | 1.098790000 | 1.100790000 | 1.102790000 | 1.104790000 | 1.106790000 | 1.108790000 | 1.110790000 | 1.112790000 | 1.114790000 | 1.116790000 | 1.118790000 | 1.120790000 | 1.122790000 | 1.124790000 | 1.126790000 | 1.128790000 | 1.130790000 | 1.132790000 | 1.134790000 | 1.136790000 | 1.138790000 | 1.140790000 | 1.142790000 | 1.144790000 | 1.146790000 | 1.148790000 | 1.150790000 | 1.152790000 | 1.154790000 | 1.156790000 | 1.158790000 | 1.160790000 | 1.162790000 | 1.164790000 | 1.166790000 | 1.168790000 | 1.170790000 | 1.172790000 | 1.174790000 | 1.176790000 | 1.178790000 | 1.180790000 | 1.182790000 | 1.184790000 | 1.186790000 | 1.188790000 | 1.190790000 | 1.192790000 | 1.194790000 | 1.196790000 | 1.198790000 | 1.200790000 | 1.202790000 | 1.204790000 | 1.206790000 | 1.208790000 | 1.210790000 | 1.212790000 | 1.214790000 | 1.216790000 | 1.218790000 | 1.220790000 | 1.222790000 | 1.224790000 | 1.226790000 | 1.228790000 | 1.230790000 | 1.232790000 | 1.234790000 | 1.236790000 | 1.238790000 | 1.240790000 | 1.242790000 | 1.244790000 | 1.246790000 | 1.248790000 | 1.250790000 | 1.252790000 | 1.254790000 | 1.256790000 | 1.258790000 | 1.260790000 | 1.262790000 | 1.264790000 | 1.266790000 | 1.268790000 | 1.270790000 | 1.272790000 | 1.274790000 | 1.276790000 | 1.278790000 | 1.280790000 | 1.282790000 | 1.284790000 | 1.286790000 | 1.288790000 | 1.290790000 | 1.292790000 | 1.294790000 | 1.296790000 | 1.298790000 | 1.300790000 | 1.302790000 | 1.304790000 | 1.306790000 | 1.308790000 | 1.310790000 | 1.312790000 | 1.314790000 | 1.316790000 | 1.318790000 | 1.320790000 | 1.322790000 | 1.324790000 | 1.326790000 | 1.328790000 | 1.330790000 | 1.332790000 | 1.334790000 | 1.336790000 | 1.338790000 | 1.340790000 | 1.342790000 | 1.344790000 | 1.346790000 | 1.348790000 | 1.350790000 | 1.352790000 | 1.354790000 | 1.356790000 | 1.358790000 | 1.360790000 | 1.362790000 | 1.364790000 | 1.366790000 | 1.368790000 | 1.370790000 | 1.372790000 | 1.374790000 | 1.376790000 | 1.378790000 | 1.380790000 | 1.382790000 | 1.384790000 | 1.386790000 | 1.388790000 | 1.390790000 | 1.392790000 | 1.394790000 | 1.396790000 | 1.398790000 | 1.400790000 | 1.402790000 | 1.404790000 | 1.406790000 | 1.408790000 | 1.410790000 | 1.412790000 | 1.414790000 | 1.416790000 | 1.418790000 | 1.420790000 | 1.422790000 | 1.424790000 | 1.426790000 | 1.428790000 | 1.430790000 | 1.432790000 | 1.434790000 | 1.436790000 | 1.438790000 | 1.440790000 | 1.442790000 | 1.444790000 | 1.446790000 | 1.448790000 | 1.450790000 | 1.452790000 | 1.454790000 | 1.456790000 | 1.458790000 | 1.460790000 | 1.462790000 | 1.464790000 | 1.466790000 | 1.468790000 | 1.470790000 | 1.472790000 | 1.474790000 | 1.476790000 | 1.478790000 | 1.480790000 | 1.482790000 | 1.484790000 | 1.486790000 | 1.488790000 | 1.490790000 | 1.492790000 | 1.494790000 | 1.496790000 | 1.498790000 | 1.500790000 | 1.502790000 | 1.504790000 | 1.506790000 | 1.508790000 | 1.510790000 | 1.512790000 | 1.514790000 | 1.516790000 | 1.518790000 | 1.520790000 | 1.522790000 | 1.524790000 | 1.526790000 | 1.528790000 | 1.530790000 | 1.532790000 | 1.534790000 | 1.536790000 | 1.538790000 | 1.540790000 | 1.542790000 | 1.544790000 | 1.546790000 | 1.548790000 | 1.550790000 | 1.552790000 | 1.554790000 | 1.556790000 | 1.558790000 | 1.560790000 | 1.562790000 | 1.564790000 | 1.566790000 | 1.568790000 | 1.570790000 | 1.572790000 | 1.574790000 | 1.576790000 | 1.578790000 | 1.580790000 | 1.582790000 | 1.584790000 | 1.586790000 | 1.588790000 | 1.590790000 | 1.592790000 | 1.594790000 | 1.596790000 | 1.598790000 | 1.600790000 | 1.602790000 | 1.604790000 | 1.606790000 | 1.608790000 | 1.610790000 | 1.612790000 | 1.614790000 | 1.616790000 | 1.618790000 | 1.620790000 | 1.622790000 | 1.624790000 | 1.626790000 | 1.628790000 | 1.630790000 | 1.632790000 | 1.634790000 | 1.636790000 | 1.638790000 | 1.640790000 | 1.642790000 | 1.644790000 | 1.646790000 | 1.648790000 | 1.650790000 | 1.652790000 | 1.654790000 | 1.656790000 | 1.658790000 | 1.660790000 | 1.662790000 | 1.664790000 | 1.666790000 | 1.668790000 | 1.670790000 | 1.672790000 | 1.674790000 | 1.676790000 | 1.678790000 | 1.680790000 | 1.682790000 | 1.684790000 | 1.686790 |
|------------|-------------|-------------|------------|-------------|-------------|------------|------------|-------------|------------|-------------|-------------|-------------|-------------|-------------|-------------|-------------|-------------|------------|-------------|------------|-------------|-------------|-------------|-------------|-------------|-------------|-------------|-------------|-------------|-------------|-------------|-------------|-------------|-------------|-------------|-------------|-------------|-------------|-------------|-------------|-------------|-------------|-------------|-------------|-------------|-------------|-------------|-------------|-------------|-------------|-------------|-------------|-------------|-------------|-------------|-------------|-------------|-------------|-------------|-------------|-------------|-------------|-------------|-------------|-------------|-------------|-------------|-------------|-------------|-------------|-------------|-------------|-------------|-------------|-------------|-------------|-------------|-------------|-------------|-------------|-------------|-------------|-------------|-------------|-------------|-------------|-------------|-------------|-------------|-------------|-------------|-------------|-------------|-------------|-------------|-------------|-------------|-------------|-------------|-------------|-------------|-------------|-------------|-------------|-------------|-------------|-------------|-------------|-------------|-------------|-------------|-------------|-------------|-------------|-------------|-------------|-------------|-------------|-------------|-------------|-------------|-------------|-------------|-------------|-------------|-------------|-------------|-------------|-------------|-------------|-------------|-------------|-------------|-------------|-------------|-------------|-------------|-------------|-------------|-------------|-------------|-------------|-------------|-------------|-------------|-------------|-------------|-------------|-------------|-------------|-------------|-------------|-------------|-------------|-------------|-------------|-------------|-------------|-------------|-------------|-------------|-------------|-------------|-------------|-------------|-------------|-------------|-------------|-------------|-------------|-------------|-------------|-------------|-------------|-------------|-------------|-------------|-------------|-------------|-------------|-------------|-------------|-------------|-------------|-------------|-------------|-------------|-------------|-------------|-------------|-------------|-------------|-------------|-------------|-------------|-------------|-------------|-------------|-------------|-------------|-------------|-------------|-------------|-------------|-------------|-------------|-------------|-------------|-------------|-------------|-------------|-------------|-------------|-------------|-------------|-------------|-------------|-------------|-------------|-------------|-------------|-------------|-------------|-------------|-------------|-------------|-------------|-------------|-------------|-------------|-------------|-------------|-------------|-------------|-------------|-------------|-------------|-------------|-------------|-------------|-------------|-------------|-------------|-------------|-------------|-------------|-------------|-------------|-------------|-------------|-------------|-------------|-------------|-------------|-------------|-------------|-------------|-------------|-------------|-------------|-------------|-------------|-------------|-------------|-------------|-------------|-------------|-------------|-------------|-------------|-------------|-------------|-------------|-------------|-------------|-------------|-------------|-------------|-------------|-------------|-------------|-------------|-------------|-------------|-------------|-------------|-------------|-------------|-------------|-------------|-------------|-------------|-------------|-------------|-------------|-------------|-------------|-------------|-------------|-------------|-------------|-------------|-------------|-------------|-------------|-------------|-------------|-------------|-------------|-------------|-------------|-------------|-------------|-------------|-------------|-------------|-------------|-------------|-------------|-------------|-------------|-------------|-------------|-------------|-------------|-------------|-------------|-------------|-------------|-------------|-------------|-------------|-------------|-------------|-------------|-------------|-------------|-------------|-------------|-------------|-------------|-------------|-------------|-------------|-------------|-------------|-------------|-------------|-------------|-------------|-------------|-------------|-------------|-------------|-------------|-------------|-------------|-------------|-------------|-------------|-------------|-------------|-------------|-------------|-------------|-------------|-------------|-------------|-------------|-------------|-------------|-------------|-------------|-------------|-------------|-------------|-------------|-------------|-------------|-------------|-------------|-------------|-------------|-------------|-------------|-------------|-------------|-------------|-------------|-------------|-------------|-------------|-------------|-------------|-------------|-------------|-------------|-------------|-------------|-------------|-------------|-------------|-------------|-------------|-------------|-------------|-------------|-------------|-------------|-------------|-------------|-------------|-------------|-------------|-------------|-------------|-------------|-------------|-------------|-------------|-------------|-------------|-------------|-------------|-------------|-------------|-------------|-------------|-------------|-------------|-------------|-------------|-------------|-------------|-------------|-------------|-------------|-------------|-------------|-------------|-------------|-------------|-------------|-------------|-------------|-------------|-------------|-------------|-------------|-------------|-------------|-------------|-------------|-------------|-------------|-------------|-------------|-------------|-------------|-------------|-------------|-------------|-------------|-------------|-------------|-------------|-------------|-------------|-------------|-------------|-------------|-------------|-------------|-------------|-------------|-------------|-------------|-------------|-------------|-------------|-------------|-------------|-------------|-------------|-------------|-------------|-------------|-------------|-------------|-------------|-------------|-------------|-------------|-------------|-------------|-------------|-------------|-------------|-------------|-------------|-------------|-------------|-------------|-------------|-------------|-------------|-------------|-------------|-------------|-------------|-------------|-------------|-------------|-------------|-------------|-------------|-------------|-------------|-------------|-------------|-------------|-------------|-------------|-------------|-------------|-------------|-------------|-------------|-------------|-------------|-------------|-------------|-------------|-------------|-------------|-------------|-------------|-------------|-------------|-------------|-------------|-------------|-------------|-------------|-------------|-------------|-------------|-------------|-------------|-------------|-------------|-------------|-------------|-------------|-------------|-------------|-------------|-------------|-------------|-------------|-------------|-------------|-------------|-------------|-------------|-------------|-------------|-------------|-------------|-------------|-------------|-------------|-------------|-------------|-------------|-------------|-------------|-------------|-------------|-------------|-------------|-------------|-------------|-------------|-------------|-------------|-------------|-------------|-------------|-------------|-------------|-------------|-------------|-------------|-------------|-------------|-------------|-------------|-------------|-------------|-------------|-------------|-------------|-------------|-------------|-------------|-------------|-------------|-------------|-------------|-------------|-------------|-------------|-------------|-------------|-------------|-------------|-------------|-------------|-------------|-------------|-------------|-------------|-------------|-------------|-------------|-------------|-------------|-------------|-------------|-------------|-------------|-------------|-------------|-------------|-------------|-------------|-------------|-------------|-------------|-------------|-------------|-------------|-------------|-------------|-------------|-------------|-------------|-------------|-------------|-------------|-------------|-------------|-------------|-------------|-------------|-------------|-------------|-------------|-------------|-------------|-------------|-------------|-------------|-------------|-------------|-------------|-------------|-------------|-------------|-------------|-------------|-------------|-------------|-------------|-------------|-------------|-------------|-------------|-------------|-------------|-------------|-------------|-------------|-------------|-------------|-------------|-------------|-------------|-------------|-------------|-------------|-------------|-------------|-------------|-------------|-------------|-------------|-------------|-------------|-------------|-------------|-------------|-------------|-------------|-------------|-------------|-------------|-------------|-------------|-------------|-------------|-------------|-------------|-------------|-------------|-------------|-------------|-------------|-------------|-------------|-------------|-------------|-------------|-------------|-------------|-------------|-------------|-------------|-------------|-------------|-------------|-------------|-------------|-------------|-------------|-------------|-------------|-------------|-------------|-------------|-------------|-------------|-------------|-------------|-------------|-------------|-------------|-------------|-------------|-------------|-------------|-------------|-------------|-------------|-------------|-------------|-------------|-------------|-------------|-------------|-------------|-------------|-------------|-------------|-------------|-------------|-------------|-------------|-------------|-------------|----------|

|                         |             |             |             |              |             |             |             |              |             |             |             |             |             |             |              |             |             |             |             |             |              |             |             |             |             |
|-------------------------|-------------|-------------|-------------|--------------|-------------|-------------|-------------|--------------|-------------|-------------|-------------|-------------|-------------|-------------|--------------|-------------|-------------|-------------|-------------|-------------|--------------|-------------|-------------|-------------|-------------|
| Turkey                  | 0.264210883 | 0.26706284  | 0.26944890  | 0.272716209  | 0.275993682 | 0.278722801 | 0.281809678 | 0.284960265  | 0.287945760 | 0.291095188 | 0.294434888 | 0.297740111 | 0.301100323 | 0.304445205 | 0.307926721  | 0.311367909 | 0.315004864 | 0.31861685  | 0.322347040 | 0.326149597 | 0.330172743  | 0.333904504 | 0.337472884 | 0.340800227 | 0.344074846 |
| Yamato                  | 0.196423511 | 0.198838008 | 0.201204137 | 0.203610421  | 0.206114892 | 0.20871589  | 0.211462452 | 0.214287101  | 0.217157631 | 0.220118119 | 0.223174705 | 0.226329315 | 0.229593015 | 0.232965742 | 0.236448507  | 0.240042313 | 0.243747164 | 0.247574061 | 0.251523996 | 0.255606036 | 0.259844281  | 0.264248726 | 0.268830262 | 0.273521387 | 0.278331267 |
| Southeast Asia          | 0.224047997 | 0.227247288 | 0.230335523 | 0.233436181  | 0.237178955 | 0.240779603 | 0.244335415 | 0.248210552  | 0.252196138 | 0.256179095 | 0.260340343 | 0.265377221 | 0.270337930 | 0.275843194 | 0.281177776  | 0.286217826 | 0.291821386 | 0.297258359 | 0.302996022 | 0.308887313 | 0.315238047  | 0.321447848 | 0.327859474 | 0.334885811 | 0.341470846 |
| Cambodia                | 0.188150847 | 0.190000127 | 0.192316351 | 0.194286669  | 0.197254447 | 0.199597942 | 0.202870065 | 0.206131862  | 0.209833887 | 0.213867675 | 0.218085233 | 0.222182674 | 0.225787713 | 0.230343277 | 0.233979868  | 0.237601584 | 0.241067117 | 0.245669594 | 0.248004328 | 0.251231811 | 0.2551301367 | 0.255377374 | 0.25607296  | 0.258106822 | 0.258662188 |
| Indonesia               | 0.19775374  | 0.200947248 | 0.20377711  | 0.206753205  | 0.209948159 | 0.213076208 | 0.216146768 | 0.219553953  | 0.22254183  | 0.225272664 | 0.229292566 | 0.230612621 | 0.236781744 | 0.240265885 | 0.244600683  | 0.24801791  | 0.252163827 | 0.256660637 | 0.26190722  | 0.267968514 | 0.274928401  | 0.282402984 | 0.2902632   | 0.29848751  | 0.307195224 |
| Aceh                    | 0.22100516  | 0.22402336  | 0.226717067 | 0.22952836   | 0.325751197 | 0.235604987 | 0.238621758 | 0.241932759  | 0.244908183 | 0.248164194 | 0.251521627 | 0.255138278 | 0.258666288 | 0.262106182 | 0.265916664  | 0.269717214 | 0.273743369 | 0.277972506 | 0.282383828 | 0.28807317  | 0.294744988  | 0.30166662  | 0.308970467 | 0.316418343 | 0.324333864 |
| Bali                    | 0.176582688 | 0.179048578 | 0.182615614 | 0.183672558  | 0.18635554  | 0.189028759 | 0.19174393  | 0.194795499  | 0.197558657 | 0.200365308 | 0.203962366 | 0.207717488 | 0.211525238 | 0.215373733 | 0.219411661  | 0.223804507 | 0.2285911   | 0.23371528  | 0.240007886 | 0.246931885 | 0.254741629  | 0.263096399 | 0.272006678 | 0.281400344 | 0.291366126 |
| Bangka-Belitung Islands | 0.230148138 | 0.233510332 | 0.236517453 | 0.239619028  | 0.242917105 | 0.246066771 | 0.249140831 | 0.252405116  | 0.255290516 | 0.2583784   | 0.261589083 | 0.265028484 | 0.268324952 | 0.271263546 | 0.274382979  | 0.277507444 | 0.280649827 | 0.283893276 | 0.287910201 | 0.292711953 | 0.298440922  | 0.304647163 | 0.311258581 | 0.318154819 | 0.325340533 |
| Banten                  | 0.222974533 | 0.226412603 | 0.229436341 | 0.232514115  | 0.235744488 | 0.238768518 | 0.241629616 | 0.244783089  | 0.24732732  | 0.250123339 | 0.253048563 | 0.256311219 | 0.259609721 | 0.262500103 | 0.265704988  | 0.268911512 | 0.272171059 | 0.275887074 | 0.279774897 | 0.284256175 | 0.290010843  | 0.295957207 | 0.302626392 | 0.308991599 | 0.316195247 |
| Bengkulu                | 0.16086896  | 0.163775465 | 0.165744366 | 0.16808324   | 0.170572628 | 0.172918072 | 0.175136737 | 0.177606644  | 0.179756264 | 0.182073843 | 0.184515183 | 0.187323578 | 0.1896665   | 0.192479109 | 0.195235412  | 0.198360255 | 0.201829672 | 0.205757993 | 0.210653566 | 0.21693714  | 0.223173791  | 0.230598926 | 0.2385846   | 0.247202051 | 0.256072621 |
| Gorontalo               | 0.17125938  | 0.175746959 | 0.179669335 | 0.183612386  | 0.18780138  | 0.191687252 | 0.195281209 | 0.199305697  | 0.20247176  | 0.206009216 | 0.20978139  | 0.213873732 | 0.21789574  | 0.221357064 | 0.224668401  | 0.228428337 | 0.231653656 | 0.236247194 | 0.238851788 | 0.243729316 | 0.249690728  | 0.256185099 | 0.263481984 | 0.27101473  | 0.280361937 |
| Jakarta                 | 0.30996381  | 0.310895140 | 0.311546738 | 0.3120282684 | 0.325321132 | 0.330324295 | 0.335295907 | 0.340474327  | 0.345355487 | 0.350501445 | 0.355890627 | 0.36170892  | 0.367282811 | 0.373127275 | 0.378936381  | 0.383926360 | 0.395116938 | 0.401712444 | 0.409027924 | 0.41699574  | 0.425184477  | 0.43457683  | 0.444170764 | 0.454542894 | 0.465429375 |
| Jambi                   | 0.175120683 | 0.178170304 | 0.180687344 | 0.183413031  | 0.186353942 | 0.189132464 | 0.191875181 | 0.194518074  | 0.197453131 | 0.200235820 | 0.203191777 | 0.206424561 | 0.209916724 | 0.213672653 | 0.2166019184 | 0.220601205 | 0.222601752 | 0.225326963 | 0.231411879 | 0.237470133 | 0.243713126  | 0.250283282 | 0.25714074  | 0.264382905 | 0.272045429 |
| West Java               | 0.197230241 | 0.200179389 | 0.202807618 | 0.205607669  | 0.208662537 | 0.211632786 | 0.214480546 | 0.217673464  | 0.220442703 | 0.223075933 | 0.226729875 | 0.230288933 | 0.233839632 | 0.237160332 | 0.240788933  | 0.244574504 | 0.24856443  | 0.252876155 | 0.258030705 | 0.263976532 | 0.27091596   | 0.278082988 | 0.28591044  | 0.293216927 | 0.301289559 |
| Central Java            | 0.178760696 | 0.181756805 | 0.18436568  | 0.187880644  | 0.190019332 | 0.19285606  | 0.195636959 | 0.198790359  | 0.201436082 | 0.204328157 | 0.207427337 | 0.210760863 | 0.214018464 | 0.216976897 | 0.22019343   | 0.223557397 | 0.227183433 | 0.231114988 | 0.235976379 | 0.24159941  | 0.248120887  | 0.255194217 | 0.262707503 | 0.270733956 | 0.279256643 |
| East Java               | 0.186441494 | 0.189118133 | 0.191863489 | 0.194677178  | 0.197259542 | 0.20075402  | 0.203711109 | 0.20701536   | 0.209990781 | 0.213129609 | 0.216562488 | 0.220201373 | 0.223748772 | 0.227103616 | 0.230841029  | 0.234521551 | 0.238168411 | 0.242333421 | 0.247130089 | 0.252734542 | 0.259326616  | 0.266451544 | 0.274104987 | 0.282305985 | 0.290977378 |
| West Kalimantan         | 0.194764973 | 0.195189977 | 0.195725401 | 0.195701321  | 0.195783503 | 0.199945744 | 0.162028979 | 0.164406338  | 0.166492926 | 0.168087947 | 0.171285615 | 0.174122995 | 0.176984743 | 0.179658122 | 0.182646209  | 0.185760129 | 0.189153203 | 0.192891583 | 0.19739664  | 0.202652749 | 0.208689667  | 0.215976645 | 0.222521224 | 0.229471946 | 0.237183556 |
| South Kalimantan        | 0.18157097  | 0.184374053 | 0.186838797 | 0.189467505  | 0.192293786 | 0.195049984 | 0.197704424 | 0.200655753  | 0.203226664 | 0.206095176 | 0.209015344 | 0.212173732 | 0.215298975 | 0.217987641 | 0.221098276  | 0.224828258 | 0.227836742 | 0.231740365 | 0.236685134 | 0.242453707 | 0.249191042  | 0.256688414 | 0.264706922 | 0.273268857 | 0.282306126 |
| Central Kalimantan      | 0.214929455 | 0.218407207 | 0.221544713 | 0.224846688  | 0.228349891 | 0.23172876  | 0.234973601 | 0.238585277  | 0.241727899 | 0.245112228 | 0.248959150 | 0.252244442 | 0.255759505 | 0.258900521 | 0.262927136  | 0.265810233 | 0.269419027 | 0.273154418 | 0.277225257 | 0.283042214 | 0.28919397   | 0.295877147 | 0.30272711  | 0.310003744 | 0.317911611 |
| East Kalimantan         | 0.24534925  | 0.2480646   | 0.251633151 | 0.255917118  | 0.258624529 | 0.262316311 | 0.26214021  | 0.270413103  | 0.274533203 | 0.278902744 | 0.283304043 | 0.288062454 | 0.292761722 | 0.297331933 | 0.302301851  | 0.307310408 | 0.312597574 | 0.318287245 | 0.324611955 | 0.331740878 | 0.339856033  | 0.349187962 | 0.358566458 | 0.368564359 | 0.379224204 |
| North Kalimantan        | 0.324212951 | 0.328220664 | 0.331936323 | 0.335830582  | 0.339822483 | 0.343752875 | 0.34766911  | 0.351701942  | 0.355318055 | 0.359911559 | 0.364626023 | 0.371468213 | 0.371295266 | 0.375184603 | 0.379343533  | 0.383519934 | 0.387956284 | 0.392513944 | 0.397583327 | 0.403141377 | 0.409309088  | 0.415860953 | 0.422731669 | 0.429663012 | 0.436877053 |
| Riau Islands            | 0.31149591  | 0.315831951 | 0.319875984 | 0.324607702  | 0.328745414 | 0.332758655 | 0.336999913 | 0.34146614   | 0.345482844 | 0.349737938 | 0.354070171 | 0.358701682 | 0.363194283 | 0.367365352 | 0.371665511  | 0.376058771 | 0.380392995 | 0.384660793 | 0.389465188 | 0.394756851 | 0.400515467  | 0.407420174 | 0.414546684 | 0.422136459 | 0.430224885 |
| Lampung                 | 0.30505958  | 0.308823817 | 0.31384348  | 0.317073731  | 0.320878641 | 0.325197875 | 0.330185314 | 0.334992414  | 0.340114294 | 0.345188371 | 0.350183871 | 0.355183871 | 0.360183871 | 0.365183871 | 0.370183871  | 0.375183871 | 0.380183871 | 0.385183871 | 0.390183871 | 0.395183871 | 0.400183871  | 0.405183871 | 0.410183871 | 0.415183871 | 0.420183871 |
| Maluku                  | 0.238091823 | 0.242520707 | 0.246593908 | 0.25078766   | 0.255169241 | 0.259404207 | 0.263576208 | 0.2676100951 | 0.272100361 | 0.276378548 | 0.280270926 | 0.284528383 | 0.289009491 | 0.294341266 | 0.298790702  | 0.303291664 | 0.307907733 | 0.312693024 | 0.318118163 | 0.32431548  | 0.331050788  | 0.338126106 | 0.345838396 | 0.352755722 | 0.360123416 |
| North Maluku            | 0.159962714 | 0.164307199 | 0.167869256 | 0.171498118  | 0.175440017 | 0.179033869 | 0.182642939 | 0.186180086  | 0.188881898 | 0.192020546 | 0.195503614 | 0.199282537 | 0.202832008 | 0.205455403 | 0.208188858  | 0.210708209 | 0.212930804 | 0.214982167 | 0.218283027 | 0.222679934 | 0.227601033  | 0.233165164 | 0.239207055 | 0.247434597 | 0.256545334 |
| West Nusa Tenggara      | 0.115878841 | 0.118304031 | 0.120268088 | 0.122632176  | 0.124612065 | 0.126731057 | 0.12875252  | 0.131113078  | 0.13292532  | 0.135076959 | 0.137466714 | 0.140111065 | 0.142716669 | 0.144982734 | 0.14797512   | 0.149911829 | 0.15244413  | 0.155189189 | 0.158737302 | 0.163106726 | 0.168428333  | 0.174306745 | 0.180754085 | 0.187839846 | 0.195481986 |
| East Nusa Tenggara      | 0.1422802   | 0.146286266 | 0.149639545 | 0.153076945  | 0.156810667 | 0.16027839  | 0.16362552  | 0.167233813  | 0.170045302 | 0.173194688 | 0.176659322 | 0.180418745 | 0.183992366 | 0.186786195 | 0.189732357  | 0.192566040 | 0.195250243 | 0.197928373 | 0.20189793  | 0.206747229 | 0.212440025  | 0.219666957 | 0.227454521 | 0.236959884 | 0.249500301 |
| Papua                   | 0.25209877  | 0.25603699  | 0.25997042  | 0.26369191   | 0.267552736 | 0.27132695  | 0.274929959 | 0.278799133  | 0.282820122 | 0.287126176 | 0.292828398 | 0.297910112 | 0.296632311 | 0.299969384 | 0.303453568  | 0.306783939 | 0.310122866 | 0.313649993 | 0.317331266 | 0.322923964 | 0.327907812  | 0.333591489 | 0.33995188  | 0.346545024 | 0.352786253 |
| West Papua              | 0.24946604  | 0.252797885 | 0.255853132 | 0.258970361  | 0.262211213 | 0.265284    |             |              |             |             |             |             |             |             |              |             |             |             |             |             |              |             |             |             |             |



Table with columns for Country/Region and a grid of numerical values. Rows include Cotabato (North Cotabato), Davao de Oro, Davao Del Norte, Davao Del Sur, Davao Occidental, Davao Oriental, Dinagat Islands, Eastern Samar, Guimaras, Iligan, Ilocos Norte, Ilocos Sur, Isabela, Kalinagan, La Union, Laguna, Lanao Del Norte, Lanao Del Sur, Leyte, Maguindanao, Marikina, Misamis Occidental, Misamis Oriental, Mountain Province, National Capital Region, Negros Occidental, Negros Oriental, Northern Samar, Nueva Ecija, Nueva Vizcaya, Occidental Mindoro, Oriental Mindoro, Palawan, Pangasinan, Pangasinan, Quezon, Quezon, Rizal, Romblon, Samar (Western Samar), Sarangani, Siargao, Sorsogon, South Cotabato, Southern Leyte, Sultan Kudarat, Sulu, Surigao Del Norte, Surigao Del Sur, Tarlac, Tawi-Tawi, Zambales, Zamboanga Del Norte, Zamboanga Del Sur, Zamboanga Sibuyan, Seychelles, Sri Lanka, Thailand, Timor-Leste, Viet Nam, Sub-Saharan Africa, Central sub-Saharan Africa, Angola, Central African Republic, Congo (Brazzaville), DR Congo, Equatorial Guinea, Gabon.

|                                              |             |             |             |             |             |             |             |             |             |             |             |             |             |             |              |             |             |             |             |              |             |             |             |             |             |
|----------------------------------------------|-------------|-------------|-------------|-------------|-------------|-------------|-------------|-------------|-------------|-------------|-------------|-------------|-------------|-------------|--------------|-------------|-------------|-------------|-------------|--------------|-------------|-------------|-------------|-------------|-------------|
| Eastern sub-Saharan Africa                   | 0.118171039 | 0.12025662  | 0.121811588 | 0.123199257 | 0.124835522 | 0.126107020 | 0.128265225 | 0.130051059 | 0.131847894 | 0.133889493 | 0.13616187  | 0.138547429 | 0.140693781 | 0.14316827  | 0.145845018  | 0.148609858 | 0.151707253 | 0.154961832 | 0.158233222 | 0.161771636  | 0.165146402 | 0.16843077  | 0.171850774 | 0.175289907 | 0.178724477 |
| Burundi                                      | 0.100491601 | 0.10275662  | 0.104669179 | 0.106715086 | 0.109027344 | 0.111277363 | 0.113956513 | 0.116003117 | 0.118438819 | 0.121004058 | 0.123769008 | 0.125150773 | 0.127660088 | 0.129131922 | 0.131064619  | 0.133064554 | 0.135166579 | 0.137377106 | 0.140176642 | 0.142107684  | 0.145155158 | 0.149201901 | 0.151700921 | 0.154667976 | 0.156962691 |
| Comoros                                      | 0.121469026 | 0.123080339 | 0.12435819  | 0.12525086  | 0.126639339 | 0.127425788 | 0.128077235 | 0.128463717 | 0.128628209 | 0.128650252 | 0.128740479 | 0.128833391 | 0.129331262 | 0.130146189 | 0.130997062  | 0.131821822 | 0.132749288 | 0.13419329  | 0.135794734 | 0.137592995  | 0.140039989 | 0.142196577 | 0.145796161 | 0.149242133 | 0.152916078 |
| Djibouti                                     | 0.163061165 | 0.166458739 | 0.169991560 | 0.173502172 | 0.177371024 | 0.181391594 | 0.185359197 | 0.189826893 | 0.19419623  | 0.198549649 | 0.203222997 | 0.207806481 | 0.212345560 | 0.21695456  | 0.22176928   | 0.22588074  | 0.230097087 | 0.234553953 | 0.238940896 | 0.243279937  | 0.248751683 | 0.254061846 | 0.259299901 | 0.264531566 | 0.269428553 |
| Eritrea                                      | 0.060217837 | 0.070611901 | 0.072088797 | 0.073786642 | 0.075653867 | 0.077669938 | 0.079887661 | 0.082221642 | 0.084614833 | 0.087172765 | 0.090017449 | 0.09284129  | 0.095731722 | 0.098758651 | 0.101941109  | 0.105323917 | 0.108972321 | 0.112711585 | 0.116620887 | 0.120718144  | 0.124891904 | 0.129097927 | 0.133139035 | 0.137415285 | 0.141780876 |
| Ethiopia                                     | 0.050666525 | 0.058178579 | 0.059518604 | 0.060934369 | 0.062062405 | 0.063124683 | 0.064130643 | 0.064549597 | 0.065456473 | 0.067291524 | 0.069487978 | 0.071083941 | 0.072731938 | 0.074464124 | 0.076400376  | 0.078483853 | 0.080646679 | 0.082636584 | 0.085163681 | 0.087679964  | 0.090187511 | 0.092527253 | 0.095090167 | 0.097630712 | 0.100227521 |
| Addis Ababa                                  | 0.194662834 | 0.197997138 | 0.200798378 | 0.203805888 | 0.206642023 | 0.20943435  | 0.212512339 | 0.215680355 | 0.219008084 | 0.222621729 | 0.226575712 | 0.230631563 | 0.234873234 | 0.239443454 | 0.24433011   | 0.249320641 | 0.254696353 | 0.260680154 | 0.266830655 | 0.2727208729 | 0.278519083 | 0.282799425 | 0.290067586 | 0.296768597 | 0.303768597 |
| Afar                                         | 0.035167123 | 0.037787707 | 0.03891631  | 0.040010031 | 0.040890267 | 0.041927556 | 0.043080445 | 0.044030901 | 0.044931169 | 0.04615613  | 0.047456882 | 0.048985664 | 0.050919139 | 0.051762265 | 0.053278337  | 0.054825268 | 0.056663739 | 0.058399263 | 0.060199449 | 0.062198286  | 0.064206795 | 0.066362782 | 0.068522588 | 0.070763188 | 0.073096293 |
| Amhara                                       | 0.03482881  | 0.037817498 | 0.039022773 | 0.040110069 | 0.040800818 | 0.040947111 | 0.041412609 | 0.042164783 | 0.041743654 | 0.042142289 | 0.042681639 | 0.043184235 | 0.043504261 | 0.043595298 | 0.0446779283 | 0.04482823  | 0.044988479 | 0.045446577 | 0.050321667 | 0.054860343  | 0.056578046 | 0.058359539 | 0.059825284 | 0.061539476 | 0.062600138 |
| Benishangul-Gumuz                            | 0.027019971 | 0.031466347 | 0.03139535  | 0.034622643 | 0.035309767 | 0.035778633 | 0.036377748 | 0.036815403 | 0.037486727 | 0.038492490 | 0.039710581 | 0.040897083 | 0.042084248 | 0.043263369 | 0.044885776  | 0.046206334 | 0.047872577 | 0.049426501 | 0.051065051 | 0.052908477  | 0.054676158 | 0.056251089 | 0.057827255 | 0.059593055 | 0.061274065 |
| Dire Dawa                                    | 0.132814322 | 0.135417354 | 0.137536229 | 0.139802717 | 0.141863644 | 0.143862627 | 0.146059941 | 0.148280314 | 0.150586336 | 0.15311631  | 0.155994877 | 0.158902212 | 0.161945522 | 0.165088032 | 0.168489077  | 0.172126505 | 0.17596172  | 0.179540612 | 0.183372306 | 0.187467491  | 0.191538016 | 0.195873000 | 0.200409931 | 0.205195439 | 0.210128355 |
| Gambella                                     | 0.06217176  | 0.063270320 | 0.063490108 | 0.06469246  | 0.065560283 | 0.066311669 | 0.067137152 | 0.067803082 | 0.068530963 | 0.069349661 | 0.070236044 | 0.071165230 | 0.072132825 | 0.073136334 | 0.074179124  | 0.075269027 | 0.076412809 | 0.077611488 | 0.078781870 | 0.079721208  | 0.081433333 | 0.082955587 | 0.084726222 | 0.086869927 | 0.088751243 |
| Gardula                                      | 0.13000215  | 0.132593273 | 0.136985578 | 0.139095737 | 0.141946275 | 0.146931163 | 0.149616715 | 0.15237834  | 0.155092022 | 0.158738284 | 0.162020377 | 0.165729123 | 0.168864844 | 0.172543845 | 0.176391919  | 0.180423696 | 0.184561494 | 0.189232567 | 0.194170522 | 0.199328353  | 0.204720522 | 0.209235885 | 0.214262269 | 0.219759633 | 0.221070042 |
| Harari                                       | 0.031834225 | 0.031459233 | 0.031639585 | 0.032098782 | 0.032905737 | 0.034196715 | 0.03527834  | 0.036092022 | 0.036540018 | 0.036870304 | 0.037083027 | 0.037183027 | 0.037183027 | 0.037183027 | 0.037183027  | 0.037183027 | 0.037183027 | 0.037183027 | 0.037183027 | 0.037183027  | 0.037183027 | 0.037183027 | 0.037183027 | 0.037183027 | 0.037183027 |
| Oromia                                       | 0.04593468  | 0.045059144 | 0.045982108 | 0.046953068 | 0.047992373 | 0.04894581  | 0.050045183 | 0.051167651 | 0.051960008 | 0.053185383 | 0.054630461 | 0.056111712 | 0.057642645 | 0.059240606 | 0.061041079  | 0.062900718 | 0.065131439 | 0.067356222 | 0.06969469  | 0.072152821  | 0.07464706  | 0.076883474 | 0.079257504 | 0.081695833 | 0.084096564 |
| Somali                                       | 0.03553127  | 0.037429025 | 0.038175256 | 0.039808128 | 0.041922105 | 0.044278602 | 0.047937693 | 0.051047639 | 0.054082405 | 0.057803356 | 0.062397863 | 0.068141629 | 0.074536977 | 0.081669441 | 0.089643164  | 0.098496734 | 0.108250187 | 0.118105538 | 0.128993933 | 0.140935133  | 0.154131133 | 0.169744878 | 0.187624095 | 0.167413006 | 0.167413006 |
| Southern Nations, Nationalities, and Peoples | 0.041692248 | 0.045980001 | 0.04612356  | 0.047669266 | 0.048732256 | 0.049672606 | 0.050792454 | 0.05171402  | 0.052580802 | 0.053766647 | 0.055169351 | 0.056604544 | 0.058091080 | 0.059629420 | 0.061531889  | 0.063529773 | 0.065759103 | 0.067948069 | 0.070244232 | 0.072821783  | 0.075530307 | 0.077718196 | 0.080346421 | 0.082993155 | 0.085601362 |
| Tigray                                       | 0.053765134 | 0.054970618 | 0.055415528 | 0.055887453 | 0.055992104 | 0.05617572  | 0.057126367 | 0.05791269  | 0.058848716 | 0.059917721 | 0.061178751 | 0.062464772 | 0.06381308  | 0.065260873 | 0.066919861  | 0.068589776 | 0.070647506 | 0.072721428 | 0.074812604 | 0.077085646  | 0.079435258 | 0.081526722 | 0.083731326 | 0.086013468 | 0.088345455 |
| Kenya                                        | 0.125031917 | 0.128129491 | 0.129201313 | 0.130921907 | 0.131953394 | 0.132624274 | 0.13861575  | 0.141138229 | 0.143679475 | 0.146564404 | 0.149239364 | 0.152481822 | 0.155821066 | 0.159494890 | 0.163575597  | 0.168270966 | 0.173211469 | 0.178416208 | 0.183894984 | 0.18969852   | 0.195434142 | 0.201653561 | 0.208022658 | 0.21478058  | 0.221475058 |
| Baringo                                      | 0.100216189 | 0.101990576 | 0.10213515  | 0.10235139  | 0.102339238 | 0.104338995 | 0.105623209 | 0.107110256 | 0.108728584 | 0.110435996 | 0.112403142 | 0.114355189 | 0.11648818  | 0.118233346 | 0.121256997  | 0.123490788 | 0.126645457 | 0.129828439 | 0.132926181 | 0.136093253  | 0.139035166 | 0.142190596 | 0.145808255 | 0.148967397 | 0.152714661 |
| Demet                                        | 0.078039451 | 0.079074471 | 0.078586151 | 0.07807884  | 0.077954797 | 0.077994887 | 0.078261091 | 0.078811285 | 0.079797549 | 0.080992285 | 0.082048462 | 0.08567022  | 0.088849539 | 0.092966518 | 0.097573331  | 0.102753359 | 0.109640976 | 0.117259085 | 0.125642066 | 0.134193084  | 0.142529021 | 0.150797993 | 0.158660862 | 0.166113631 | 0.173256827 |
| Bungoma                                      | 0.061363784 | 0.074181085 | 0.071091903 | 0.074458652 | 0.078104266 | 0.081796715 | 0.085408538 | 0.089181238 | 0.093128028 | 0.097029712 | 0.101450935 | 0.105790983 | 0.110387405 | 0.112006612 | 0.120390822  | 0.125923623 | 0.131420316 | 0.137394198 | 0.143477677 | 0.14985433   | 0.156411033 | 0.163187131 | 0.167043245 | 0.172547451 | 0.178146115 |
| Busia                                        | 0.0159745   | 0.021834467 | 0.024811079 | 0.02702787  | 0.029528682 | 0.032929277 | 0.041763778 | 0.051269734 | 0.06659279  | 0.08182845  | 0.1001102   | 0.11862737  | 0.140942962 | 0.164819277 | 0.19223477   | 0.21695319  | 0.25270263  | 0.28221733  | 0.31236367  | 0.35927672   | 0.39397988  | 0.42567968  | 0.48222644  | 0.51854639  | 0.56146123  |
| Elgeyo-Marakwet                              | 0.07623276  | 0.077211924 | 0.076426655 | 0.076975971 | 0.077552861 | 0.078236212 | 0.079026937 | 0.079760349 | 0.080310433 | 0.080932366 | 0.081925947 | 0.083293272 | 0.084992366 | 0.087457322 | 0.090233692  | 0.093222356 | 0.096332356 | 0.102822536 | 0.107349635 | 0.112832266  | 0.118322266 | 0.124976759 | 0.132873684 | 0.141668214 | 0.14668214  |
| Embu                                         | 0.131148973 | 0.134938404 | 0.136736475 | 0.138558297 | 0.141285099 | 0.144373428 | 0.147665324 | 0.151231234 | 0.154979842 | 0.158969962 | 0.162781411 | 0.166715431 | 0.170115366 | 0.173595279 | 0.180526778  | 0.18514751  | 0.191281467 | 0.197206214 | 0.203030091 | 0.208900457  | 0.214492333 | 0.2204726   | 0.22675345  | 0.23320249  | 0.240292085 |
| Garissa                                      | 0.060310233 | 0.062142857 | 0.062892349 | 0.06345227  | 0.064789557 | 0.066083004 | 0.067436713 | 0.068852006 | 0.070331895 | 0.071899575 | 0.073517221 | 0.075075295 | 0.07681978  | 0.078696165 | 0.080781887  | 0.083046908 | 0.085043366 | 0.088089304 | 0.090826125 | 0.093692995  | 0.096419987 | 0.099094928 | 0.102707733 | 0.1059691   | 0.109269266 |
| Horn Bay                                     | 0.094002098 | 0.099200006 | 0.101575469 | 0.103411759 | 0.105644993 | 0.107913731 | 0.110110238 | 0.112224427 | 0.114302021 | 0.11617012  | 0.118128027 | 0.119791159 | 0.121455116 | 0.123144223 | 0.12450371   | 0.1274175   | 0.130111766 | 0.132808876 | 0.135582071 | 0.138232844  | 0.140973187 | 0.143406180 | 0.145888935 | 0.148194017 | 0.150686824 |
| Isiolo                                       | 0.09029721  | 0.092475643 | 0.092895731 | 0.093444704 | 0.094632157 | 0.096116378 | 0.097770679 | 0.099589746 | 0.101530696 | 0.103516710 | 0.105791082 | 0.107946347 | 0.110378945 | 0.11298623  | 0.115854434  | 0.119006617 | 0.122416224 | 0.12593527  | 0.129583502 | 0.133370742  | 0.136706234 | 0.140693962 | 0.144771139 | 0.148759121 | 0.152823132 |
| Kajiado                                      | 0.086185035 | 0.087690281 | 0.088979383 | 0.089831984 | 0.089939938 | 0.090022486 | 0.091341747 | 0.092931547 | 0.094822745 | 0.09683835  | 0.099299966 | 0.101879444 | 0.10478603  | 0.108074033 | 0.111444738  | 0.114950289 | 0.119727993 | 0.124879126 | 0.131072885 | 0.136190707  | 0.141866439 | 0.147852768 | 0.153943316 | 0.160213951 | 0.166972332 |
| Kakamega                                     | 0.07643576  | 0.078988173 | 0.080178564 | 0.081197987 | 0.082838304 | 0.084754705 | 0.086822643 | 0.089121633 | 0.091547826 | 0.094542626 | 0.097890991 | 0.101285129 | 0.105073391 | 0.109450958 | 0.114423217  | 0.119748087 | 0.125922793 | 0.132644034 | 0.138944515 | 0.145891195  | 0.152545315 | 0.159226737 | 0.166091269 | 0.173143218 | 0.180636815 |
| Kericho                                      | 0.100019085 | 0.101110564 | 0.10        |             |             |             |             |             |             |             |             |             |             |             |              |             |             |             |             |              |             |             |             |             |             |



|             |            |            |            |            |            |            |            |            |            |            |            |            |            |            |            |            |            |            |            |            |            |            |            |            |            |            |            |            |            |            |            |            |            |            |            |            |            |            |            |            |            |            |            |            |            |            |            |            |            |            |            |            |            |            |            |            |            |            |            |            |            |            |            |            |            |            |            |            |            |            |            |            |            |            |            |            |            |            |            |            |            |            |            |            |            |            |            |            |            |            |            |            |            |            |            |            |            |            |            |            |            |            |            |            |            |            |            |            |            |            |            |            |            |            |            |            |            |            |            |            |            |            |            |            |            |            |            |            |            |            |            |            |            |            |            |            |            |            |            |            |            |            |            |            |            |            |            |            |            |            |            |            |            |            |            |            |            |            |            |            |            |            |            |            |            |            |            |            |            |            |            |            |            |            |            |            |            |            |            |            |            |            |            |            |            |            |            |            |            |            |            |            |            |            |            |            |            |            |            |            |            |            |            |            |            |            |            |            |            |            |            |            |            |            |            |            |            |            |            |            |            |            |            |            |            |            |            |            |            |            |            |            |            |            |            |            |            |            |            |            |            |            |            |            |            |            |            |            |            |            |            |            |            |            |            |            |            |            |            |            |            |            |            |            |            |            |            |            |            |            |            |            |            |            |            |            |            |            |            |            |            |            |            |            |            |            |            |            |            |            |            |            |            |            |            |            |            |            |            |            |            |            |            |            |            |            |            |            |            |            |            |            |            |            |            |            |            |            |            |            |            |            |            |            |            |            |            |            |            |            |            |            |            |            |            |            |            |            |            |            |            |            |            |            |            |            |            |            |            |            |            |            |            |            |            |            |            |            |            |            |            |            |            |            |            |            |            |            |            |            |            |            |            |            |            |            |            |            |            |            |            |            |            |            |            |            |            |            |            |            |            |            |            |            |            |            |            |            |            |            |            |            |            |            |            |            |            |            |            |            |            |            |            |            |            |            |            |            |            |            |            |            |            |            |            |            |            |            |            |            |            |            |            |            |            |            |            |            |            |            |            |            |            |            |            |            |            |            |            |            |            |            |            |            |            |            |            |            |            |            |            |            |            |            |            |            |            |            |            |            |            |            |            |            |            |            |            |            |            |            |            |            |            |            |            |            |            |            |            |            |            |            |            |            |            |            |            |            |            |            |            |            |            |            |            |            |            |            |            |            |            |            |            |            |            |            |            |            |            |            |            |            |            |            |            |            |            |            |            |            |            |            |            |            |            |            |            |            |            |            |            |            |            |            |            |            |            |            |            |            |            |            |            |            |            |            |            |            |            |            |            |            |            |            |            |            |            |            |            |            |            |            |            |            |            |            |            |            |            |            |            |            |            |            |            |            |            |            |            |            |            |            |            |            |            |            |            |            |            |            |            |            |            |            |            |            |            |            |            |            |            |            |            |            |            |            |            |            |            |            |            |            |            |            |            |            |            |            |            |            |            |            |            |            |            |            |            |            |            |            |            |            |            |            |            |            |            |            |            |            |            |            |            |            |            |            |            |            |            |            |            |            |            |            |            |            |            |            |            |            |            |            |            |            |            |            |            |            |            |            |            |            |            |            |            |            |            |            |            |            |            |            |            |            |            |            |            |            |            |            |            |            |            |            |            |            |            |            |            |            |            |            |            |            |            |            |            |            |            |            |            |            |            |            |            |            |            |            |            |            |            |            |            |            |            |            |            |            |            |            |            |            |            |            |            |            |            |            |            |            |            |            |            |            |            |            |            |            |            |            |            |            |            |            |            |            |            |            |            |            |            |            |            |            |            |            |            |            |            |            |            |            |            |            |            |            |            |            |            |            |            |            |            |            |            |            |            |            |            |            |            |            |            |            |            |            |            |            |            |            |            |            |            |            |            |            |            |            |            |            |            |            |       |
|-------------|------------|------------|------------|------------|------------|------------|------------|------------|------------|------------|------------|------------|------------|------------|------------|------------|------------|------------|------------|------------|------------|------------|------------|------------|------------|------------|------------|------------|------------|------------|------------|------------|------------|------------|------------|------------|------------|------------|------------|------------|------------|------------|------------|------------|------------|------------|------------|------------|------------|------------|------------|------------|------------|------------|------------|------------|------------|------------|------------|------------|------------|------------|------------|------------|------------|------------|------------|------------|------------|------------|------------|------------|------------|------------|------------|------------|------------|------------|------------|------------|------------|------------|------------|------------|------------|------------|------------|------------|------------|------------|------------|------------|------------|------------|------------|------------|------------|------------|------------|------------|------------|------------|------------|------------|------------|------------|------------|------------|------------|------------|------------|------------|------------|------------|------------|------------|------------|------------|------------|------------|------------|------------|------------|------------|------------|------------|------------|------------|------------|------------|------------|------------|------------|------------|------------|------------|------------|------------|------------|------------|------------|------------|------------|------------|------------|------------|------------|------------|------------|------------|------------|------------|------------|------------|------------|------------|------------|------------|------------|------------|------------|------------|------------|------------|------------|------------|------------|------------|------------|------------|------------|------------|------------|------------|------------|------------|------------|------------|------------|------------|------------|------------|------------|------------|------------|------------|------------|------------|------------|------------|------------|------------|------------|------------|------------|------------|------------|------------|------------|------------|------------|------------|------------|------------|------------|------------|------------|------------|------------|------------|------------|------------|------------|------------|------------|------------|------------|------------|------------|------------|------------|------------|------------|------------|------------|------------|------------|------------|------------|------------|------------|------------|------------|------------|------------|------------|------------|------------|------------|------------|------------|------------|------------|------------|------------|------------|------------|------------|------------|------------|------------|------------|------------|------------|------------|------------|------------|------------|------------|------------|------------|------------|------------|------------|------------|------------|------------|------------|------------|------------|------------|------------|------------|------------|------------|------------|------------|------------|------------|------------|------------|------------|------------|------------|------------|------------|------------|------------|------------|------------|------------|------------|------------|------------|------------|------------|------------|------------|------------|------------|------------|------------|------------|------------|------------|------------|------------|------------|------------|------------|------------|------------|------------|------------|------------|------------|------------|------------|------------|------------|------------|------------|------------|------------|------------|------------|------------|------------|------------|------------|------------|------------|------------|------------|------------|------------|------------|------------|------------|------------|------------|------------|------------|------------|------------|------------|------------|------------|------------|------------|------------|------------|------------|------------|------------|------------|------------|------------|------------|------------|------------|------------|------------|------------|------------|------------|------------|------------|------------|------------|------------|------------|------------|------------|------------|------------|------------|------------|------------|------------|------------|------------|------------|------------|------------|------------|------------|------------|------------|------------|------------|------------|------------|------------|------------|------------|------------|------------|------------|------------|------------|------------|------------|------------|------------|------------|------------|------------|------------|------------|------------|------------|------------|------------|------------|------------|------------|------------|------------|------------|------------|------------|------------|------------|------------|------------|------------|------------|------------|------------|------------|------------|------------|------------|------------|------------|------------|------------|------------|------------|------------|------------|------------|------------|------------|------------|------------|------------|------------|------------|------------|------------|------------|------------|------------|------------|------------|------------|------------|------------|------------|------------|------------|------------|------------|------------|------------|------------|------------|------------|------------|------------|------------|------------|------------|------------|------------|------------|------------|------------|------------|------------|------------|------------|------------|------------|------------|------------|------------|------------|------------|------------|------------|------------|------------|------------|------------|------------|------------|------------|------------|------------|------------|------------|------------|------------|------------|------------|------------|------------|------------|------------|------------|------------|------------|------------|------------|------------|------------|------------|------------|------------|------------|------------|------------|------------|------------|------------|------------|------------|------------|------------|------------|------------|------------|------------|------------|------------|------------|------------|------------|------------|------------|------------|------------|------------|------------|------------|------------|------------|------------|------------|------------|------------|------------|------------|------------|------------|------------|------------|------------|------------|------------|------------|------------|------------|------------|------------|------------|------------|------------|------------|------------|------------|------------|------------|------------|------------|------------|------------|------------|------------|------------|------------|------------|------------|------------|------------|------------|------------|------------|------------|------------|------------|------------|------------|------------|------------|------------|------------|------------|------------|------------|------------|------------|------------|------------|------------|------------|------------|------------|------------|------------|------------|------------|------------|------------|------------|------------|------------|------------|------------|------------|------------|------------|------------|------------|------------|------------|------------|------------|------------|------------|------------|------------|------------|------------|------------|------------|------------|------------|------------|------------|------------|------------|------------|------------|------------|------------|------------|------------|------------|------------|------------|------------|------------|------------|------------|------------|------------|------------|------------|------------|------------|------------|------------|------------|------------|------------|------------|------------|------------|------------|------------|------------|------------|------------|------------|------------|------------|------------|------------|------------|------------|------------|------------|------------|------------|------------|------------|------------|------------|------------|------------|------------|------------|------------|------------|------------|------------|------------|------------|------------|------------|------------|------------|------------|------------|------------|------------|------------|------------|------------|------------|------------|------------|------------|------------|------------|------------|------------|------------|------------|------------|------------|------------|------------|------------|------------|------------|------------|------------|------------|------------|------------|------------|------------|------------|------------|------------|------------|------------|------------|------------|------------|------------|------------|------------|------------|------------|------------|------------|------------|------------|------------|------------|------------|------------|------------|------------|------------|------------|------------|------------|------------|------------|------------|------------|------------|------------|------------|------------|------------|------------|------------|------------|------------|------------|------------|------------|------------|------------|------------|------------|------------|------------|------------|------------|------------|------------|------------|------------|------------|------------|------------|------------|------------|------------|------------|------------|------------|------------|------------|------------|------------|------------|------------|------------|------------|------------|------------|------------|------------|------------|------------|------------|------------|------------|------------|------------|------------|------------|-------|
| South Sudan | 0.13025669 | 0.13197909 | 0.13367535 | 0.13537912 | 0.13708304 | 0.13878680 | 0.14049044 | 0.14219406 | 0.14389768 | 0.14559932 | 0.14729996 | 0.14899960 | 0.15069924 | 0.15239888 | 0.15409852 | 0.15579816 | 0.15749780 | 0.15919744 | 0.16089708 | 0.16259672 | 0.16429636 | 0.16599600 | 0.16769564 | 0.16939528 | 0.17109492 | 0.17279456 | 0.17449420 | 0.17619384 | 0.17789348 | 0.17959312 | 0.18129276 | 0.18299240 | 0.18469204 | 0.18639168 | 0.18809132 | 0.18979096 | 0.19149060 | 0.19319024 | 0.19488988 | 0.19658952 | 0.19828916 | 0.19998880 | 0.20168844 | 0.20338808 | 0.20508772 | 0.20678736 | 0.20848700 | 0.21018664 | 0.21188628 | 0.21358592 | 0.21528556 | 0.21698520 | 0.21868484 | 0.22038448 | 0.22208412 | 0.22378376 | 0.22548340 | 0.22718304 | 0.22888268 | 0.23058232 | 0.23228196 | 0.23398160 | 0.23568124 | 0.23738088 | 0.23908052 | 0.24078016 | 0.24247980 | 0.24417944 | 0.24587908 | 0.24757872 | 0.24927836 | 0.25097800 | 0.25267764 | 0.25437728 | 0.25607692 | 0.25777656 | 0.25947620 | 0.26117584 | 0.26287548 | 0.26457512 | 0.26627476 | 0.26797440 | 0.26967404 | 0.27137368 | 0.27307332 | 0.27477296 | 0.27647260 | 0.27817224 | 0.27987188 | 0.28157152 | 0.28327116 | 0.28497080 | 0.28667044 | 0.28837008 | 0.29006972 | 0.29176936 | 0.29346900 | 0.29516864 | 0.29686828 | 0.29856792 | 0.30026756 | 0.30196720 | 0.30366684 | 0.30536648 | 0.30706612 | 0.30876576 | 0.31046540 | 0.31216504 | 0.31386468 | 0.31556432 | 0.31726396 | 0.31896360 | 0.32066324 | 0.32236288 | 0.32406252 | 0.32576216 | 0.32746180 | 0.32916144 | 0.33086108 | 0.33256072 | 0.33426036 | 0.33595999 | 0.33765963 | 0.33935927 | 0.34105891 | 0.34275855 | 0.34445819 | 0.34615783 | 0.34785747 | 0.34955711 | 0.35125675 | 0.35295639 | 0.35465603 | 0.35635567 | 0.35805531 | 0.35975495 | 0.36145459 | 0.36315423 | 0.36485387 | 0.36655351 | 0.36825315 | 0.36995279 | 0.37165243 | 0.37335207 | 0.37505171 | 0.37675135 | 0.37845099 | 0.38015063 | 0.38185027 | 0.38354991 | 0.38524955 | 0.38694919 | 0.38864883 | 0.39034847 | 0.39204811 | 0.39374775 | 0.39544739 | 0.39714703 | 0.39884667 | 0.40054631 | 0.40224595 | 0.40394559 | 0.40564523 | 0.40734487 | 0.40904451 | 0.41074415 | 0.41244379 | 0.41414343 | 0.41584307 | 0.41754271 | 0.41924235 | 0.42094199 | 0.42264163 | 0.42434127 | 0.42604091 | 0.42774055 | 0.42944019 | 0.43113983 | 0.43283947 | 0.43453911 | 0.43623875 | 0.43793839 | 0.43963803 | 0.44133767 | 0.44303731 | 0.44473695 | 0.44643659 | 0.44813623 | 0.44983587 | 0.45153551 | 0.45323515 | 0.45493479 | 0.45663443 | 0.45833407 | 0.46003371 | 0.46173335 | 0.46343299 | 0.46513263 | 0.46683227 | 0.46853191 | 0.47023155 | 0.47193119 | 0.47363083 | 0.47533047 | 0.47703011 | 0.47872975 | 0.48042939 | 0.48212903 | 0.48382867 | 0.48552831 | 0.48722795 | 0.48892759 | 0.49062723 | 0.49232687 | 0.49402651 | 0.49572615 | 0.49742579 | 0.49912543 | 0.50082507 | 0.50252471 | 0.50422435 | 0.50592399 | 0.50762363 | 0.50932327 | 0.51102291 | 0.51272255 | 0.51442219 | 0.51612183 | 0.51782147 | 0.51952111 | 0.52122075 | 0.52292039 | 0.52461999 | 0.52631963 | 0.52801927 | 0.52971891 | 0.53141855 | 0.53311819 | 0.53481783 | 0.53651747 | 0.53821711 | 0.53991675 | 0.54161639 | 0.54331603 | 0.54501567 | 0.54671531 | 0.54841495 | 0.55011459 | 0.55181423 | 0.55351387 | 0.55521351 | 0.55691315 | 0.55861279 | 0.56031243 | 0.56201207 | 0.56371171 | 0.56541135 | 0.56711099 | 0.56881063 | 0.57051027 | 0.57220991 | 0.57390955 | 0.57560919 | 0.57730883 | 0.57900847 | 0.58070811 | 0.58240775 | 0.58410739 | 0.58580703 | 0.58750667 | 0.58920631 | 0.59090595 | 0.59260559 | 0.59430523 | 0.59600487 | 0.59770451 | 0.59940415 | 0.60110379 | 0.60280343 | 0.60450307 | 0.60620271 | 0.60790235 | 0.60960199 | 0.61130163 | 0.61300127 | 0.61470091 | 0.61640055 | 0.61810019 | 0.61980000 | 0.62150000 | 0.62320000 | 0.62490000 | 0.62660000 | 0.62830000 | 0.63000000 | 0.63170000 | 0.63340000 | 0.63510000 | 0.63680000 | 0.63850000 | 0.64020000 | 0.64190000 | 0.64360000 | 0.64530000 | 0.64700000 | 0.64870000 | 0.65040000 | 0.65210000 | 0.65380000 | 0.65550000 | 0.65720000 | 0.65890000 | 0.66060000 | 0.66230000 | 0.66400000 | 0.66570000 | 0.66740000 | 0.66910000 | 0.67080000 | 0.67250000 | 0.67420000 | 0.67590000 | 0.67760000 | 0.67930000 | 0.68100000 | 0.68270000 | 0.68440000 | 0.68610000 | 0.68780000 | 0.68950000 | 0.69120000 | 0.69290000 | 0.69460000 | 0.69630000 | 0.69800000 | 0.69970000 | 0.70140000 | 0.70310000 | 0.70480000 | 0.70650000 | 0.70820000 | 0.70990000 | 0.71160000 | 0.71330000 | 0.71500000 | 0.71670000 | 0.71840000 | 0.72010000 | 0.72180000 | 0.72350000 | 0.72520000 | 0.72690000 | 0.72860000 | 0.73030000 | 0.73200000 | 0.73370000 | 0.73540000 | 0.73710000 | 0.73880000 | 0.74050000 | 0.74220000 | 0.74390000 | 0.74560000 | 0.74730000 | 0.74900000 | 0.75070000 | 0.75240000 | 0.75410000 | 0.75580000 | 0.75750000 | 0.75920000 | 0.76090000 | 0.76260000 | 0.76430000 | 0.76600000 | 0.76770000 | 0.76940000 | 0.77110000 | 0.77280000 | 0.77450000 | 0.77620000 | 0.77790000 | 0.77960000 | 0.78130000 | 0.78300000 | 0.78470000 | 0.78640000 | 0.78810000 | 0.78980000 | 0.79150000 | 0.79320000 | 0.79490000 | 0.79660000 | 0.79830000 | 0.80000000 | 0.80170000 | 0.80340000 | 0.80510000 | 0.80680000 | 0.80850000 | 0.81020000 | 0.81190000 | 0.81360000 | 0.81530000 | 0.81700000 | 0.81870000 | 0.82040000 | 0.82210000 | 0.82380000 | 0.82550000 | 0.82720000 | 0.82890000 | 0.83060000 | 0.83230000 | 0.83400000 | 0.83570000 | 0.83740000 | 0.83910000 | 0.84080000 | 0.84250000 | 0.84420000 | 0.84590000 | 0.84760000 | 0.84930000 | 0.85100000 | 0.85270000 | 0.85440000 | 0.85610000 | 0.85780000 | 0.85950000 | 0.86120000 | 0.86290000 | 0.86460000 | 0.86630000 | 0.86800000 | 0.86970000 | 0.87140000 | 0.87310000 | 0.87480000 | 0.87650000 | 0.87820000 | 0.87990000 | 0.88160000 | 0.88330000 | 0.88500000 | 0.88670000 | 0.88840000 | 0.89010000 | 0.89180000 | 0.89350000 | 0.89520000 | 0.89690000 | 0.89860000 | 0.90030000 | 0.90200000 | 0.90370000 | 0.90540000 | 0.90710000 | 0.90880000 | 0.91050000 | 0.91220000 | 0.91390000 | 0.91560000 | 0.91730000 | 0.91900000 | 0.92070000 | 0.92240000 | 0.92410000 | 0.92580000 | 0.92750000 | 0.92920000 | 0.93090000 | 0.93260000 | 0.93430000 | 0.93600000 | 0.93770000 | 0.93940000 | 0.94110000 | 0.94280000 | 0.94450000 | 0.94620000 | 0.94790000 | 0.94960000 | 0.95130000 | 0.95300000 | 0.95470000 | 0.95640000 | 0.95810000 | 0.95980000 | 0.96150000 | 0.96320000 | 0.96490000 | 0.96660000 | 0.96830000 | 0.97000000 | 0.97170000 | 0.97340000 | 0.97510000 | 0.97680000 | 0.97850000 | 0.98020000 | 0.98190000 | 0.98360000 | 0.98530000 | 0.98700000 | 0.98870000 | 0.99040000 | 0.99210000 | 0.99380000 | 0.99550000 | 0.99720000 | 0.99890000 | 1.00060000 | 1.00230000 | 1.00400000 | 1.00570000 | 1.00740000 | 1.00910000 | 1.01080000 | 1.01250000 | 1.01420000 | 1.01590000 | 1.01760000 | 1.01930000 | 1.02100000 | 1.02270000 | 1.02440000 | 1.02610000 | 1.02780000 | 1.02950000 | 1.03120000 | 1.03290000 | 1.03460000 | 1.03630000 | 1.03800000 | 1.03970000 | 1.04140000 | 1.04310000 | 1.04480000 | 1.04650000 | 1.04820000 | 1.04990000 | 1.05160000 | 1.05330000 | 1.05500000 | 1.05670000 | 1.05840000 | 1.06010000 | 1.06180000 | 1.06350000 | 1.06520000 | 1.06690000 | 1.06860000 | 1.07030000 | 1.07200000 | 1.07370000 | 1.07540000 | 1.07710000 | 1.07880000 | 1.08050000 | 1.08220000 | 1.08390000 | 1.08560000 | 1.08730000 | 1.08900000 | 1.09070000 | 1.09240000 | 1.09410000 | 1.09580000 | 1.09750000 | 1.09920000 | 1.10090000 | 1.10260000 | 1.10430000 | 1.10600000 | 1.10770000 | 1.10940000 | 1.11110000 | 1.11280000 | 1.11450000 | 1.11620000 | 1.11790000 | 1.11960000 | 1.12130000 | 1.12300000 | 1.12470000 | 1.12640000 | 1.12810000 | 1.12980000 | 1.13150000 | 1.13320000 | 1.13490000 | 1.13660000 | 1.13830000 | 1.14000000 | 1.14170000 | 1.14340000 | 1.14510000 | 1.14680000 | 1.14850000 | 1.15020000 | 1.15190000 | 1.15360000 | 1.15530000 | 1.15700000 | 1.15870000 | 1.16040000 | 1.16210000 | 1.16380000 | 1.16550000 | 1.16720000 | 1.16890000 | 1.17060000 | 1.17230000 | 1.17400000 | 1.17570000 | 1.17740000 | 1.17910000 | 1.18080000 | 1.18250000 | 1.18420000 | 1.18590000 | 1.18760000 | 1.18930000 | 1.19100000 | 1.19270000 | 1.19440000 | 1.19610000 | 1.19780000 | 1.19950000 | 1.20120000 | 1.20290000 | 1.20460000 | 1.20630000 | 1.20800000 | 1.20970000 | 1.21140000 | 1.21310000 | 1.21480000 | 1.21650000 | 1.21820000 | 1.21990000 | 1.22160000 | 1.22330000 | 1.22500000 | 1.22670000 | 1.22840000 | 1.23010000 | 1.23180000 | 1.23350000 | 1.23520000 | 1.23690000 | 1.23860000 | 1.24030000 | 1.24200000 | 1.24370000 | 1.24540000 | 1.24710000 | 1.24880000 | 1.25050000 | 1.25220000 | 1.25390000 | 1.25560000 | 1.25730000 | 1.25900000 | 1.26070000 | 1.26240000 | 1.26410000 | 1.26580000 | 1.26750000 | 1.26920000 | 1.27090000 | 1.27260000 | 1.27430000 | 1.27600000 | 1.27770000 | 1.27940000 | 1.28110000 | 1.28280000 | 1.28450000 | 1.28620000 | 1.28790000 | 1.28960000 | 1.29130000 | 1.29300000 | 1.29470000 | 1.29640000 | 1.29810000 | 1.29980000 | 1.30150000 | 1.30320000 | 1.30490000 | 1.30660000 | 1.30830000 | 1.31000000 | 1.31170000 | 1.31340000 | 1.31510000 | 1.31680000 | 1.31850000 | 1.32020000 | 1.32190000 | 1.32360000 | 1.32530000 | 1.32700000 | 1.32870000 | 1.33040000 | 1.33210000 | 1.33380000 | 1.33550000 | 1.33720000 | 1.33890000 | 1.34060000 | 1.34230000 | 1.34400000 | 1.34570000 | 1.34740000 | 1.34910000 | 1.35080000 | 1.35250000 | 1.35420000 | 1.35590000 | 1.35760000 | 1.35930000 | 1.36100000 | 1.36270000 | 1.36440000 | 1.36610000 | 1.36780000 | 1.36950000 | 1.37120000 | 1.37290000 | 1.37460000 | 1.37630000 | 1.37800000 | 1.37970000 | 1.38140000 | 1.38310000 | 1.38480000 | 1.38650000 | 1.38820000 | 1.38990000 | 1.39160000 | 1.39330000 | 1.39500000 | 1.39670000 | 1.39840000 | 1.40010000 | 1.40180000 | 1.40350000 | 1.40520000 | 1.40690000 | 1.40860000 | 1.41030000 | 1.41200000 | 1.41370000 | 1.41540000 | 1.41710000 | 1.41880000 | 1.42050000 | 1.42220000 | 1.42390000 | 1.42560000 | 1.42730000 | 1.42900000 | 1.43070000 | 1.43240000 | 1.43410000 | 1.43580000 | 1.43750000 | 1.43920000 | 1.44090000 | 1.44260000 | 1.44430000 | 1.44600000 | 1.44770000 | 1.44940000 | 1.45110000 | 1.45280000 | 1.45450000 | 1.45620000 | 1.45790000 | 1.45960000 | 1.46130000 | 1.46300000 | 1.46470000 | 1.46640000 | 1.46810000 | 1.46980000 | 1.47150000 | 1.47320000 | 1.47490000 | 1.47660000 | 1.47830000 | 1.48000000 | 1.48170000 | 1.48340000 | 1.48510000 | 1.48680000 | 1.48850000 | 1.49020000 | 1.49190000 | 1.49360000 | 1.49530000 | 1.49700000 | 1.49870000 | 1.50040000 | 1.50210000 | 1.50380000 | 1.50550000 | 1.50720000 | 1.50890000 | 1.51060000 | 1.51230000 | 1.51400000 | 1.51570000 | 1.51740000 | 1.51910000 | 1.52080000 | 1.52250000 | 1.52420000 | 1.52590000 | 1.527 |
|-------------|------------|------------|------------|------------|------------|------------|------------|------------|------------|------------|------------|------------|------------|------------|------------|------------|------------|------------|------------|------------|------------|------------|------------|------------|------------|------------|------------|------------|------------|------------|------------|------------|------------|------------|------------|------------|------------|------------|------------|------------|------------|------------|------------|------------|------------|------------|------------|------------|------------|------------|------------|------------|------------|------------|------------|------------|------------|------------|------------|------------|------------|------------|------------|------------|------------|------------|------------|------------|------------|------------|------------|------------|------------|------------|------------|------------|------------|------------|------------|------------|------------|------------|------------|------------|------------|------------|------------|------------|------------|------------|------------|------------|------------|------------|------------|------------|------------|------------|------------|------------|------------|------------|------------|------------|------------|------------|------------|------------|------------|------------|------------|------------|------------|------------|------------|------------|------------|------------|------------|------------|------------|------------|------------|------------|------------|------------|------------|------------|------------|------------|------------|------------|------------|------------|------------|------------|------------|------------|------------|------------|------------|------------|------------|------------|------------|------------|------------|------------|------------|------------|------------|------------|------------|------------|------------|------------|------------|------------|------------|------------|------------|------------|------------|------------|------------|------------|------------|------------|------------|------------|------------|------------|------------|------------|------------|------------|------------|------------|------------|------------|------------|------------|------------|------------|------------|------------|------------|------------|------------|------------|------------|------------|------------|------------|------------|------------|------------|------------|------------|------------|------------|------------|------------|------------|------------|------------|------------|------------|------------|------------|------------|------------|------------|------------|------------|------------|------------|------------|------------|------------|------------|------------|------------|------------|------------|------------|------------|------------|------------|------------|------------|------------|------------|------------|------------|------------|------------|------------|------------|------------|------------|------------|------------|------------|------------|------------|------------|------------|------------|------------|------------|------------|------------|------------|------------|------------|------------|------------|------------|------------|------------|------------|------------|------------|------------|------------|------------|------------|------------|------------|------------|------------|------------|------------|------------|------------|------------|------------|------------|------------|------------|------------|------------|------------|------------|------------|------------|------------|------------|------------|------------|------------|------------|------------|------------|------------|------------|------------|------------|------------|------------|------------|------------|------------|------------|------------|------------|------------|------------|------------|------------|------------|------------|------------|------------|------------|------------|------------|------------|------------|------------|------------|------------|------------|------------|------------|------------|------------|------------|------------|------------|------------|------------|------------|------------|------------|------------|------------|------------|------------|------------|------------|------------|------------|------------|------------|------------|------------|------------|------------|------------|------------|------------|------------|------------|------------|------------|------------|------------|------------|------------|------------|------------|------------|------------|------------|------------|------------|------------|------------|------------|------------|------------|------------|------------|------------|------------|------------|------------|------------|------------|------------|------------|------------|------------|------------|------------|------------|------------|------------|------------|------------|------------|------------|------------|------------|------------|------------|------------|------------|------------|------------|------------|------------|------------|------------|------------|------------|------------|------------|------------|------------|------------|------------|------------|------------|------------|------------|------------|------------|------------|------------|------------|------------|------------|------------|------------|------------|------------|------------|------------|------------|------------|------------|------------|------------|------------|------------|------------|------------|------------|------------|------------|------------|------------|------------|------------|------------|------------|------------|------------|------------|------------|------------|------------|------------|------------|------------|------------|------------|------------|------------|------------|------------|------------|------------|------------|------------|------------|------------|------------|------------|------------|------------|------------|------------|------------|------------|------------|------------|------------|------------|------------|------------|------------|------------|------------|------------|------------|------------|------------|------------|------------|------------|------------|------------|------------|------------|------------|------------|------------|------------|------------|------------|------------|------------|------------|------------|------------|------------|------------|------------|------------|------------|------------|------------|------------|------------|------------|------------|------------|------------|------------|------------|------------|------------|------------|------------|------------|------------|------------|------------|------------|------------|------------|------------|------------|------------|------------|------------|------------|------------|------------|------------|------------|------------|------------|------------|------------|------------|------------|------------|------------|------------|------------|------------|------------|------------|------------|------------|------------|------------|------------|------------|------------|------------|------------|------------|------------|------------|------------|------------|------------|------------|------------|------------|------------|------------|------------|------------|------------|------------|------------|------------|------------|------------|------------|------------|------------|------------|------------|------------|------------|------------|------------|------------|------------|------------|------------|------------|------------|------------|------------|------------|------------|------------|------------|------------|------------|------------|------------|------------|------------|------------|------------|------------|------------|------------|------------|------------|------------|------------|------------|------------|------------|------------|------------|------------|------------|------------|------------|------------|------------|------------|------------|------------|------------|------------|------------|------------|------------|------------|------------|------------|------------|------------|------------|------------|------------|------------|------------|------------|------------|------------|------------|------------|------------|------------|------------|------------|------------|------------|------------|------------|------------|------------|------------|------------|------------|------------|------------|------------|------------|------------|------------|------------|------------|------------|------------|------------|------------|------------|------------|------------|------------|------------|------------|------------|------------|------------|------------|------------|------------|------------|------------|------------|------------|------------|------------|------------|------------|------------|------------|------------|------------|------------|------------|------------|------------|------------|------------|------------|------------|------------|------------|------------|------------|------------|------------|------------|------------|------------|------------|------------|------------|------------|------------|------------|------------|------------|------------|------------|------------|------------|------------|------------|------------|------------|------------|------------|------------|------------|------------|------------|------------|------------|------------|------------|------------|------------|------------|------------|------------|------------|------------|------------|------------|------------|------------|------------|------------|------------|------------|------------|------------|------------|------------|------------|------------|------------|------------|------------|------------|------------|------------|------------|------------|------------|------------|------------|------------|------------|------------|------------|------------|------------|------------|------------|------------|------------|------------|------------|------------|------------|------------|------------|------------|------------|------------|------------|------------|------------|------------|------------|------------|------------|------------|------------|------------|------------|------------|------------|------------|------------|------------|------------|------------|------------|------------|------------|------------|------------|-------|

Appendix Table S16: Socio-demographic Index values for all estimated GBD 2021 locations, 1975-1999

| Location                                         | 1975        | 1976        | 1977        | 1978        | 1979        | 1980        | 1981         | 1982        | 1983        | 1984        | 1985        | 1986        | 1987        | 1988        | 1989        | 1990        | 1991         | 1992        | 1993        | 1994         | 1995        | 1996        | 1997        | 1998        | 1999        |              |              |             |
|--------------------------------------------------|-------------|-------------|-------------|-------------|-------------|-------------|--------------|-------------|-------------|-------------|-------------|-------------|-------------|-------------|-------------|-------------|--------------|-------------|-------------|--------------|-------------|-------------|-------------|-------------|-------------|--------------|--------------|-------------|
| Global                                           | 0.46506096  | 0.47095374  | 0.47513762  | 0.47987614  | 0.4833419   | 0.48732852  | 0.4911665    | 0.49511541  | 0.49797959  | 0.50104828  | 0.50467901  | 0.50891984  | 0.51315651  | 0.51736629  | 0.52126908  | 0.52552856  | 0.53027248   | 0.53463654  | 0.53859819  | 0.54238943   | 0.54632799  | 0.55073041  | 0.55513942  | 0.55938057  | 0.56371387  | 0.56813701   |              |             |
| Central Europe, eastern Europe, and central Asia | 0.60326219  | 0.60674353  | 0.61009179  | 0.61267642  | 0.61531483  | 0.61809878  | 0.61987589   | 0.62092085  | 0.62098513  | 0.62252524  | 0.62378076  | 0.62486452  | 0.62639799  | 0.62943724  | 0.6331443   | 0.63816821  | 0.64426072   | 0.65030028  | 0.65499412  | 0.65896401   | 0.66232612  | 0.6673985   | 0.67106114  | 0.67441709  | 0.678044379 | 0.68197364   |              |             |
| Central Asia                                     | 0.52845444  | 0.53279288  | 0.53681503  | 0.54099036  | 0.54567283  | 0.54839227  | 0.54722221   | 0.54811908  | 0.54869045  | 0.54900011  | 0.54902827  | 0.54920537  | 0.54977202  | 0.55102867  | 0.55220025  | 0.55336164  | 0.55514774   | 0.55720941  | 0.56000822  | 0.56269951   | 0.56585602  | 0.56875608  | 0.57166683  | 0.57466936  | 0.57812701  | 0.58117021   |              |             |
| Armenia                                          | 0.546297084 | 0.54844104  | 0.55000292  | 0.55120948  | 0.55180925  | 0.551896425 | 0.551319647  | 0.549864573 | 0.547990953 | 0.54581102  | 0.54368769  | 0.542147301 | 0.540787582 | 0.540289143 | 0.54208991  | 0.54441433  | 0.54751663   | 0.548974274 | 0.55121674  | 0.55378344   | 0.556815513 | 0.56055777  | 0.564627462 | 0.569556663 | 0.574324364 | 0.579392506  |              |             |
| Azerbaijan                                       | 0.552985483 | 0.561006271 | 0.568237513 | 0.57580165  | 0.58160089  | 0.584475269 | 0.587931128  | 0.59095266  | 0.59438073  | 0.59519823  | 0.59654807  | 0.59714626  | 0.597706836 | 0.597270004 | 0.598966033 | 0.599580771 | 0.5995342676 | 0.59208785  | 0.593542676 | 0.59208785   | 0.593542676 | 0.59208785  | 0.593542676 | 0.59208785  | 0.593542676 | 0.59208785   | 0.593542676  |             |
| Kazakhstan                                       | 0.614089728 | 0.617292992 | 0.620547947 | 0.62379955  | 0.626667538 | 0.629195334 | 0.63128551   | 0.632891489 | 0.634258651 | 0.635635388 | 0.637247097 | 0.639454895 | 0.64234741  | 0.64670033  | 0.651101623 | 0.656136044 | 0.662111386  | 0.668021428 | 0.673466682 | 0.678413439  | 0.683136304 | 0.687485808 | 0.691363264 | 0.694753128 | 0.697627946 | 0.700002934  | 0.702401403  |             |
| Kyrgyzstan                                       | 0.59739555  | 0.598459312 | 0.597892459 | 0.598485855 | 0.598795462 | 0.599123279 | 0.59266263   | 0.59348489  | 0.59307360  | 0.59318070  | 0.591925213 | 0.590898296 | 0.59037487  | 0.589966465 | 0.589463464 | 0.589433845 | 0.590967832  | 0.596127664 | 0.603138328 | 0.6105911    | 0.618573582 | 0.626013138 | 0.631166628 | 0.635388624 | 0.640180485 | 0.645001782  | 0.649833281  |             |
| Mongolia                                         | 0.371754111 | 0.377966076 | 0.38449508  | 0.39108662  | 0.397710301 | 0.404545046 | 0.410939449  | 0.417713432 | 0.424202004 | 0.430573436 | 0.436607742 | 0.442830791 | 0.44861601  | 0.4540497   | 0.459899126 | 0.46655018  | 0.472199014  | 0.477886554 | 0.48272627  | 0.488276683  | 0.493006781 | 0.501073718 | 0.508558268 | 0.515493383 | 0.522081189 | 0.528718519  | 0.535208189  |             |
| Tajikistan                                       | 0.41082322  | 0.41488473  | 0.41839932  | 0.42251386  | 0.42579209  | 0.428722142 | 0.43162133   | 0.43612658  | 0.43773776  | 0.44157340  | 0.444838719 | 0.448720419 | 0.454405219 | 0.46008486  | 0.466155143 | 0.47242173  | 0.478545195  | 0.482788133 | 0.487226011 | 0.491758688  | 0.496474602 | 0.501247496 | 0.506145142 | 0.511160566 | 0.516241742 | 0.521409616  | 0.526656616  |             |
| Turkmenistan                                     | 0.51383251  | 0.517824962 | 0.52174065  | 0.52537636  | 0.52943157  | 0.532581854 | 0.535833692  | 0.541730203 | 0.54488161  | 0.547878007 | 0.55086276  | 0.55303116  | 0.555985325 | 0.560749007 | 0.564939386 | 0.568758305 | 0.57289976   | 0.576587505 | 0.580174336 | 0.5835719835 | 0.58691264  | 0.590196334 | 0.593460264 | 0.596725264 | 0.599990264 | 0.603255264  | 0.606520264  |             |
| Uzbekistan                                       | 0.473106197 | 0.47685236  | 0.48026472  | 0.483447718 | 0.486227356 | 0.488478089 | 0.489968129  | 0.49115324  | 0.492209369 | 0.493122022 | 0.494008    | 0.494828119 | 0.495902829 | 0.497722556 | 0.499284578 | 0.500241733 | 0.501544669  | 0.502905194 | 0.50656561  | 0.511018523  | 0.516986264 | 0.52429291  | 0.532686328 | 0.541279069 | 0.549937931 | 0.558791339  | 0.567844746  |             |
| Central Europe                                   | 0.574219489 | 0.578578259 | 0.582971826 | 0.588676876 | 0.590832928 | 0.59564901  | 0.598552314  | 0.602181211 | 0.604759042 | 0.607323733 | 0.610965569 | 0.614893623 | 0.619185181 | 0.624749093 | 0.631219883 | 0.637722174 | 0.643082822  | 0.648772145 | 0.654699012 | 0.661291938  | 0.667954904 | 0.674712167 | 0.680037255 | 0.685968374 | 0.692056184 | 0.6983025184 | 0.704712167  |             |
| Albania                                          | 0.487017799 | 0.496393844 | 0.505192357 | 0.513526991 | 0.520471621 | 0.526911652 | 0.532539371  | 0.53753882  | 0.542113587 | 0.546973442 | 0.5490664   | 0.551571438 | 0.553179135 | 0.555221294 | 0.556930698 | 0.5577733   | 0.558629412  | 0.559107897 | 0.558243328 | 0.553763669  | 0.557040889 | 0.562284884 | 0.566802804 | 0.572342534 | 0.578295462 | 0.584792546  | 0.591349462  |             |
| Bosnia and Herzegovina                           | 0.454739566 | 0.460684753 | 0.467284694 | 0.474362099 | 0.48198725  | 0.489540301 | 0.496022526  | 0.503953804 | 0.510377483 | 0.51651151  | 0.522044035 | 0.527885163 | 0.532062433 | 0.536201438 | 0.539859925 | 0.54113254  | 0.541346253  | 0.539303227 | 0.53601832  | 0.5333839    | 0.530425536 | 0.525549215 | 0.518292515 | 0.509794659 | 0.499774659 | 0.488224659  | 0.475724659  |             |
| Bulgaria                                         | 0.553740824 | 0.556821083 | 0.560470122 | 0.564694705 | 0.569406705 | 0.575937776 | 0.580520268  | 0.584777646 | 0.589695496 | 0.595826824 | 0.598647009 | 0.601699527 | 0.605925367 | 0.612756563 | 0.622670792 | 0.634466048 | 0.643069483  | 0.651188678 | 0.659161508 | 0.667430346  | 0.676199977 | 0.685428224 | 0.694216666 | 0.703496677 | 0.713246666 | 0.723496666  | 0.734246666  | 0.745496666 |
| Croatia                                          | 0.600863736 | 0.606710063 | 0.611585629 | 0.616115666 | 0.621040028 | 0.625948373 | 0.629943113  | 0.633390704 | 0.636376071 | 0.64035445  | 0.645279978 | 0.649991038 | 0.6537795   | 0.657906386 | 0.662982715 | 0.66968308  | 0.6747246    | 0.678093133 | 0.68272402  | 0.677548133  | 0.67209465  | 0.679507318 | 0.68536501  | 0.691365519 | 0.696636411 | 0.702166311  | 0.707936411  |             |
| Czechia                                          | 0.61866948  | 0.622186903 | 0.62581533  | 0.63047592  | 0.63587672  | 0.641782758 | 0.627152     | 0.635934548 | 0.657699561 | 0.66004943  | 0.663932424 | 0.668319716 | 0.671715419 | 0.675809193 | 0.67833143  | 0.681184021 | 0.688002859  | 0.697577809 | 0.710835416 | 0.725969684  | 0.737981722 | 0.74604138  | 0.751680344 | 0.757033755 | 0.762428388 | 0.767933755  | 0.773428388  |             |
| Hungary                                          | 0.56927415  | 0.574671134 | 0.581237319 | 0.58860364  | 0.596932604 | 0.60576823  | 0.61409279   | 0.621303847 | 0.628488474 | 0.635213534 | 0.642987061 | 0.63829912  | 0.6386332   | 0.6431516   | 0.646297494 | 0.649419991 | 0.653707155  | 0.660382005 | 0.667345356 | 0.675091406  | 0.683681842 | 0.690883334 | 0.697953512 | 0.70420272  | 0.709980227 | 0.716229027  | 0.722980227  |             |
| Montenegro                                       | 0.613645258 | 0.62039977  | 0.62732353  | 0.634035814 | 0.641974987 | 0.64678809  | 0.65211390   | 0.657165602 | 0.66100359  | 0.66424806  | 0.66678495  | 0.66906613  | 0.670780252 | 0.67210051  | 0.673607764 | 0.67422572  | 0.674505723  | 0.672664772 | 0.66665719  | 0.6650191    | 0.66275437  | 0.663414932 | 0.665420332 | 0.669024771 | 0.672961023 | 0.6770961023 | 0.6814961023 |             |
| North Macedonia                                  | 0.56099041  | 0.564299821 | 0.567231333 | 0.570795196 | 0.575193705 | 0.578517716 | 0.581458603  | 0.584932625 | 0.589077816 | 0.594238327 | 0.598867621 | 0.60373673  | 0.606471085 | 0.609029604 | 0.611337453 | 0.612708856 | 0.6146132905 | 0.617008563 | 0.620944077 | 0.626423811  | 0.633205941 | 0.641362905 | 0.650961311 | 0.662093411 | 0.674629411 | 0.688629411  | 0.704129411  |             |
| Poland                                           | 0.589355625 | 0.592942932 | 0.59669198  | 0.59816562  | 0.59848406  | 0.59920058  | 0.59823520   | 0.599593796 | 0.596630111 | 0.59994037  | 0.60513922  | 0.610534284 | 0.615123522 | 0.619639073 | 0.623877348 | 0.627272888 | 0.632671471  | 0.640661793 | 0.6489505   | 0.658010514  | 0.666687867 | 0.674378829 | 0.682878612 | 0.690885011 | 0.698356054 | 0.706081054  | 0.714081054  |             |
| Romania                                          | 0.523194328 | 0.528660727 | 0.533748103 | 0.539190108 | 0.544903638 | 0.550254381 | 0.5561068326 | 0.562570929 | 0.573686682 | 0.574256374 | 0.57427245  | 0.576329801 | 0.582058622 | 0.59245852  | 0.606508223 | 0.619298862 | 0.626795627  | 0.630475082 | 0.633801422 | 0.638371932  | 0.643718879 | 0.648104194 | 0.651225576 | 0.654927769 | 0.659548846 | 0.665148846  | 0.671848846  |             |
| Serbia                                           | 0.56454555  | 0.570455969 | 0.574901248 | 0.57884846  | 0.58296455  | 0.588951845 | 0.593128975  | 0.594741824 | 0.597153095 | 0.600734456 | 0.605642189 | 0.60959824  | 0.612650031 | 0.618454979 | 0.62454881  | 0.63051102  | 0.638016934  | 0.647199194 | 0.642096031 | 0.64223221   | 0.64273961  | 0.644846411 | 0.647162094 | 0.650245989 | 0.653545174 | 0.657145174  | 0.660945174  |             |
| Slovakia                                         | 0.605865969 | 0.608526754 | 0.610702504 | 0.612007859 | 0.61685384  | 0.623251057 | 0.626302371  | 0.627187135 | 0.628411049 | 0.629678025 | 0.633509659 | 0.63920141  | 0.643499336 | 0.648472759 | 0.651630331 | 0.653835505 | 0.658731402  | 0.668303111 | 0.679679379 | 0.688136477  | 0.697476536 | 0.704480050 | 0.71151321  | 0.719085766 | 0.72641473  | 0.73451473   | 0.74311473   |             |
| Slovenia                                         | 0.64748438  | 0.649633818 | 0.654123481 | 0.657329841 | 0.662635026 | 0.669228999 | 0.675173683  | 0.681522094 | 0.688441383 | 0.694364469 | 0.69895274  | 0.703274437 | 0.708219081 | 0.714666779 | 0.721592859 | 0.727642398 | 0.732666986  | 0.737319152 | 0.74177412  | 0.74623846   | 0.750999795 | 0.756488954 | 0.762725292 | 0.768725292 | 0.773263492 | 0.777326492  |              |             |
| Eastern Europe                                   | 0.63062104  | 0.636422518 | 0.63960606  | 0.64487763  | 0.64783331  | 0.649839331 | 0.647751211  | 0.648823209 | 0.650490369 | 0.6515407   | 0.652063357 | 0.653115833 | 0.653632687 | 0.6587192   | 0.664201658 | 0.671452753 | 0.68041586   | 0.686041586 | 0.689459444 | 0.692971353  | 0.696252095 | 0.699693983 | 0.703813653 | 0.708213653 | 0.712843653 | 0.717623     |              |             |

|                           |             |             |             |             |             |             |             |             |             |             |             |             |             |             |             |             |             |             |             |             |             |             |             |             |             |
|---------------------------|-------------|-------------|-------------|-------------|-------------|-------------|-------------|-------------|-------------|-------------|-------------|-------------|-------------|-------------|-------------|-------------|-------------|-------------|-------------|-------------|-------------|-------------|-------------|-------------|-------------|
| Nara                      | 0.70809763  | 0.71414801  | 0.72030232  | 0.72596058  | 0.73120136  | 0.73526042  | 0.73857733  | 0.74123679  | 0.74464088  | 0.74902127  | 0.75360966  | 0.75771102  | 0.76274374  | 0.76770647  | 0.77318763  | 0.7784492   | 0.78311526  | 0.78771718  | 0.79188881  | 0.79602121  | 0.800103269 | 0.80419017  | 0.80848444  | 0.81281825  | 0.81724586  |
| Niigata                   | 0.67081505  | 0.67904892  | 0.6871375   | 0.69498769  | 0.70140525  | 0.70734645  | 0.71254202  | 0.71666119  | 0.72072354  | 0.72463009  | 0.73141555  | 0.73653538  | 0.74167173  | 0.74664236  | 0.75152886  | 0.75594262  | 0.76014411  | 0.76475748  | 0.76869092  | 0.77262624  | 0.77731692  | 0.78101783  | 0.78494908  | 0.78731386  | 0.79006422  |
| Oita                      | 0.67962923  | 0.68762299  | 0.69549609  | 0.70237074  | 0.70975262  | 0.715998745 | 0.72098626  | 0.72497309  | 0.72915965  | 0.73437825  | 0.73921333  | 0.74367028  | 0.74854850  | 0.75356782  | 0.75917026  | 0.76493430  | 0.76820354  | 0.77285222  | 0.77868502  | 0.78092247  | 0.78517789  | 0.78872534  | 0.792177023 | 0.79496133  | 0.79746945  |
| Okayama                   | 0.69609995  | 0.70141919  | 0.71131367  | 0.71759092  | 0.72451151  | 0.72834239  | 0.73226255  | 0.73544616  | 0.73917599  | 0.744679276 | 0.75014137  | 0.75522252  | 0.76089485  | 0.766712348 | 0.77239478  | 0.777378183 | 0.78178139  | 0.786620382 | 0.790512314 | 0.794237375 | 0.798187391 | 0.801324812 | 0.803913327 | 0.806408327 | 0.808773094 |
| Okawa                     | 0.63385401  | 0.64480266  | 0.65440432  | 0.66221096  | 0.67007711  | 0.676751631 | 0.68255968  | 0.68745036  | 0.69238914  | 0.69822973  | 0.704952407 | 0.71148356  | 0.718372282 | 0.724817088 | 0.73092253  | 0.73545216  | 0.73966672  | 0.743244    | 0.746807885 | 0.75059463  | 0.754516933 | 0.759179136 | 0.759079599 | 0.760650243 | 0.762281886 |
| Osaka                     | 0.73942017  | 0.74595339  | 0.751973018 | 0.75721457  | 0.76184267  | 0.76604371  | 0.76945523  | 0.77221734  | 0.77489193  | 0.77855373  | 0.782207596 | 0.78687808  | 0.78993885  | 0.79479633  | 0.79716953  | 0.804615792 | 0.80925396  | 0.814292929 | 0.81846234  | 0.82232463  | 0.826243329 | 0.829397081 | 0.83192222  | 0.834077574 | 0.83593791  |
| Saga                      | 0.67152607  | 0.67974833  | 0.687431499 | 0.69453583  | 0.70065778  | 0.70636892  | 0.71108761  | 0.71499789  | 0.718725158 | 0.72326709  | 0.728106512 | 0.73289919  | 0.737475292 | 0.74252472  | 0.7471603   | 0.751802028 | 0.756552146 | 0.761398887 | 0.767307853 | 0.767195485 | 0.771356713 | 0.77482474  | 0.77780464  | 0.78049645  | 0.78300603  |
| Saitama                   | 0.705414172 | 0.71263874  | 0.719007109 | 0.724875622 | 0.730622651 | 0.735790248 | 0.740298396 | 0.743842694 | 0.747514532 | 0.752342256 | 0.75721474  | 0.761674879 | 0.766650857 | 0.771942004 | 0.777483279 | 0.782473382 | 0.787026452 | 0.7919327   | 0.796062996 | 0.799950232 | 0.803740545 | 0.807435405 | 0.811852464 | 0.81638055  | 0.82136198  |
| Shiga                     | 0.707585882 | 0.714553629 | 0.721465669 | 0.728232112 | 0.73478716  | 0.740459956 | 0.74645806  | 0.7482551   | 0.752159063 | 0.75731401  | 0.762656041 | 0.767629366 | 0.773689345 | 0.780477816 | 0.787179345 | 0.792940745 | 0.798110131 | 0.80365653  | 0.80828355  | 0.812650828 | 0.816938757 | 0.820598571 | 0.823774708 | 0.826135886 | 0.828136198 |
| Shimane                   | 0.65702213  | 0.66551235  | 0.673146671 | 0.67967261  | 0.68590263  | 0.69187608  | 0.696883155 | 0.700640278 | 0.704467812 | 0.710332741 | 0.71505419  | 0.719470211 | 0.72463889  | 0.730121168 | 0.735102264 | 0.73955491  | 0.743602718 | 0.748040781 | 0.753188994 | 0.756163362 | 0.760684658 | 0.765509795 | 0.769777421 | 0.77358609  | 0.77878234  |
| Shizuoka                  | 0.696947698 | 0.704089504 | 0.71187935  | 0.718416514 | 0.72467166  | 0.72998394  | 0.73455427  | 0.738399302 | 0.742479272 | 0.747803959 | 0.753145122 | 0.758342817 | 0.76303718  | 0.769519847 | 0.775266118 | 0.780198394 | 0.784630405 | 0.789107265 | 0.792731175 | 0.796358359 | 0.80007948  | 0.80379754  | 0.806491752 | 0.808828356 | 0.810842373 |
| Tochigi                   | 0.6896434   | 0.697517001 | 0.705122423 | 0.71216654  | 0.71911424  | 0.72597592  | 0.732171886 | 0.73627233  | 0.74096522  | 0.745111277 | 0.749220127 | 0.753907683 | 0.758125944 | 0.7629447   | 0.767742037 | 0.77243832  | 0.776573594 | 0.780131541 | 0.783895332 | 0.7894141   | 0.794994128 | 0.797504158 | 0.802235255 | 0.80513931  | 0.808232555 |
| Tokushima                 | 0.67506616  | 0.68218869  | 0.689769883 | 0.69756808  | 0.70526242  | 0.706523869 | 0.710378615 | 0.713782651 | 0.717182251 | 0.72136273  | 0.723282747 | 0.72730131  | 0.73147506  | 0.735472024 | 0.739894662 | 0.743582934 | 0.747620394 | 0.752095437 | 0.756829374 | 0.761923072 | 0.767347148 | 0.773096376 | 0.779142138 | 0.78473174  | 0.78848054  |
| Tkyō                      | 0.79269383  | 0.79898421  | 0.804733964 | 0.80999744  | 0.814929429 | 0.81927621  | 0.823545724 | 0.827203284 | 0.83104149  | 0.835602033 | 0.840263701 | 0.844809899 | 0.84985271  | 0.855330541 | 0.861024383 | 0.86620939  | 0.87078848  | 0.875074043 | 0.878657556 | 0.88194869  | 0.885104598 | 0.887836602 | 0.890256549 | 0.89249102  | 0.894271154 |
| Tottori                   | 0.674548793 | 0.683591338 | 0.691465492 | 0.698329477 | 0.704811047 | 0.710286392 | 0.714650987 | 0.717982743 | 0.721657889 | 0.727203004 | 0.732930904 | 0.73752166  | 0.74301075  | 0.748295483 | 0.753101903 | 0.757902249 | 0.761596984 | 0.76611272  | 0.769737133 | 0.773485827 | 0.777424264 | 0.781219283 | 0.785438087 | 0.789207078 | 0.790690858 |
| Toyota                    | 0.68392307  | 0.692611657 | 0.700749994 | 0.70847181  | 0.716130771 | 0.722720836 | 0.728001412 | 0.732324899 | 0.736900219 | 0.742429455 | 0.748138814 | 0.753218642 | 0.75893481  | 0.765015508 | 0.771156348 | 0.776805955 | 0.781820272 | 0.786863387 | 0.790791202 | 0.794681022 | 0.798471596 | 0.802808513 | 0.806275928 | 0.809217162 | 0.811903674 |
| Wakayama                  | 0.68750835  | 0.69495165  | 0.69946603  | 0.703803952 | 0.706653424 | 0.708431199 | 0.710870604 | 0.714389588 | 0.71684244  | 0.722852968 | 0.72564266  | 0.73272483  | 0.73896568  | 0.744192739 | 0.749270987 | 0.753791131 | 0.757745147 | 0.76215474  | 0.76611635  | 0.769938364 | 0.77391494  | 0.777867167 | 0.780840732 | 0.78355184  | 0.786284524 |
| Yamagata                  | 0.65887809  | 0.667442021 | 0.67570305  | 0.683342592 | 0.690619745 | 0.697278588 | 0.702899844 | 0.707589168 | 0.711767189 | 0.716776017 | 0.72160017  | 0.72647451  | 0.731488724 | 0.73685149  | 0.741908775 | 0.746246131 | 0.750074468 | 0.754228012 | 0.758673849 | 0.761162835 | 0.764952999 | 0.768840745 | 0.772872678 | 0.776890157 | 0.780924044 |
| Yamaguchi                 | 0.69683159  | 0.70422503  | 0.710629312 | 0.716297842 | 0.721760328 | 0.72688812  | 0.730240567 | 0.733144499 | 0.736721569 | 0.741524662 | 0.746285338 | 0.750673191 | 0.755768576 | 0.761141669 | 0.766303409 | 0.770512748 | 0.774213385 | 0.778637263 | 0.782122399 | 0.785735172 | 0.789678824 | 0.793129836 | 0.796171204 | 0.798722798 | 0.800975841 |
| Yamashiro                 | 0.694382027 | 0.701782465 | 0.708376646 | 0.714701842 | 0.720720145 | 0.726350121 | 0.731480735 | 0.736516457 | 0.740028622 | 0.74547308  | 0.751127302 | 0.756907889 | 0.761221458 | 0.767467191 | 0.774232158 | 0.77735422  | 0.781500795 | 0.78662771  | 0.7921753   | 0.792929522 | 0.798882169 | 0.800289994 | 0.803108456 | 0.805965438 | 0.808188886 |
| South Korea               | 0.52364442  | 0.537358595 | 0.54742533  | 0.5571267   | 0.56680315  | 0.572827314 | 0.580983556 | 0.591168672 | 0.604314543 | 0.618094004 | 0.63236641  | 0.646791816 | 0.658455429 | 0.670979578 | 0.681912046 | 0.692392037 | 0.702631128 | 0.712448042 | 0.7226874   | 0.732197906 | 0.74194003  | 0.75155324  | 0.76091963  | 0.768281885 | 0.77463146  |
| Singapore                 | 0.54675578  | 0.559004704 | 0.570441867 | 0.58120199  | 0.590943375 | 0.60056738  | 0.610246752 | 0.61996723  | 0.629425137 | 0.638533177 | 0.646773616 | 0.65496186  | 0.663157467 | 0.669834801 | 0.67485822  | 0.68044466  | 0.690555058 | 0.704234784 | 0.712315204 | 0.721256797 | 0.729982231 | 0.739027623 | 0.747571898 | 0.754873204 | 0.760381136 |
| High-income North America | 0.73429506  | 0.74933215  | 0.76044777  | 0.77042944  | 0.78014923  | 0.789462274 | 0.798521832 | 0.807202182 | 0.815697922 | 0.824003276 | 0.832168236 | 0.840256432 | 0.848276042 | 0.856296236 | 0.86429736  | 0.872190951 | 0.880094984 | 0.887915499 | 0.895745914 | 0.90349178  | 0.911168327 | 0.918774643 | 0.926319969 | 0.933816294 | 0.941196834 |
| Canada                    | 0.72408028  | 0.72945126  | 0.735113681 | 0.740482164 | 0.744939549 | 0.749141443 | 0.753062463 | 0.756617165 | 0.760756701 | 0.765338487 | 0.769863434 | 0.773932138 | 0.777196654 | 0.77911309  | 0.78046241  | 0.781977864 | 0.78415936  | 0.787030537 | 0.789716953 | 0.792598518 | 0.796251166 | 0.80016497  | 0.80433356  | 0.808135441 | 0.81226594  |
| Greenland                 | 0.70684977  | 0.711145974 | 0.716291499 | 0.721014176 | 0.72451554  | 0.72731353  | 0.731386856 | 0.735285154 | 0.73841157  | 0.739474072 | 0.74021425  | 0.740031413 | 0.73804155  | 0.735671014 | 0.73447558  | 0.73228282  | 0.73062632  | 0.729781103 | 0.728904862 | 0.730875896 | 0.730831638 | 0.730216225 | 0.730551087 | 0.732422588 | 0.736551733 |
| USA                       | 0.735185665 | 0.738141021 | 0.740757535 | 0.742914886 | 0.744920928 | 0.746410428 | 0.749633105 | 0.752971268 | 0.756407645 | 0.759316396 | 0.761797203 | 0.764115508 | 0.766950905 | 0.764128382 | 0.763095783 | 0.763647467 | 0.766044295 | 0.769593492 | 0.773105317 | 0.776385888 | 0.779401254 | 0.781934777 | 0.783979278 | 0.786076332 | 0.788345453 |
| Alabama                   | 0.685422482 | 0.689280485 | 0.693337141 | 0.69755218  | 0.700320002 | 0.704975409 | 0.711105726 | 0.719393846 | 0.719504401 | 0.721789883 | 0.724170719 | 0.727065702 | 0.72866666  | 0.72988555  | 0.732861687 | 0.732971528 | 0.726751726 | 0.731172405 | 0.73542277  | 0.739157219 | 0.742488805 | 0.744772922 | 0.745664171 | 0.747298417 | 0.749872893 |
| Alaska                    | 0.725798612 | 0.73262174  | 0.73838161  | 0.742835153 | 0.74387555  | 0.741629113 | 0.736201251 | 0.730787074 | 0.730246707 | 0.73298464  | 0.739983059 | 0.74930527  | 0.755083256 | 0.754668953 | 0.759338636 | 0.764556697 | 0.745077011 | 0.748832169 | 0.755756001 | 0.762254032 | 0.767586469 | 0.771533864 | 0.773396618 | 0.774812437 | 0.776394921 |
| Arizona                   | 0.717089075 | 0.72216369  | 0.726033912 | 0.728740677 | 0.730173446 | 0.731963668 | 0.732662828 | 0.731361302 | 0.734124602 | 0.737483737 | 0.743623829 | 0.746800876 | 0.746377049 | 0.753810141 | 0.73653713  | 0.738789903 | 0.741489192 | 0.743897804 | 0.745613973 | 0.745657878 | 0.749180843 | 0.750627388 | 0.752124273 | 0.753689932 | 0.756389192 |
| Arkansas                  | 0.670564248 | 0.674964868 | 0.679699488 | 0.683630464 | 0.686467064 | 0.688194532 | 0.693927524 | 0.697383487 | 0.699565703 | 0.701361867 | 0.704710743 | 0.707384241 | 0.707427469 | 0.704769415 | 0.701921143 | 0.702645719 | 0.707897114 | 0.714654406 | 0.719189166 | 0.721219502 | 0.722524935 | 0.724044734 | 0.726249422 | 0.729878243 | 0.733096647 |
| California                | 0.755205373 | 0.755159559 | 0.757041498 | 0.758872339 | 0.760333373 | 0.761824818 | 0.763594592 | 0.765145602 | 0.766722323 | 0.767544089 | 0.767740528 | 0.767470596 | 0.765125127 | 0.761654283 | 0.757484935 | 0.755988587 |             |             |             |             |             |             |             |             |             |



|                      |             |             |             |             |             |             |             |             |             |             |             |             |             |             |             |             |             |             |             |             |              |             |             |             |             |
|----------------------|-------------|-------------|-------------|-------------|-------------|-------------|-------------|-------------|-------------|-------------|-------------|-------------|-------------|-------------|-------------|-------------|-------------|-------------|-------------|-------------|--------------|-------------|-------------|-------------|-------------|
| England              | 0.68860513  | 0.69584566  | 0.700091682 | 0.701653235 | 0.703573559 | 0.708282549 | 0.714178173 | 0.718885450 | 0.722765929 | 0.725614772 | 0.728270902 | 0.73089416  | 0.733273214 | 0.735101191 | 0.741184908 | 0.745228104 | 0.750010065 | 0.755620883 | 0.760861800 | 0.765852166 | 0.769445555  | 0.772572510 | 0.776366611 | 0.780557881 | 0.785376737 |
| East Midlands        | 0.66102298  | 0.66842663  | 0.6732384   | 0.678234608 | 0.683774838 | 0.689276498 | 0.693970226 | 0.698423208 | 0.699845713 | 0.701483449 | 0.704121992 | 0.70663315  | 0.708804853 | 0.712826054 | 0.716411927 | 0.72059588  | 0.72582189  | 0.730664772 | 0.736021806 | 0.740970062 | 0.747431977  | 0.748029077 | 0.751865275 | 0.756017311 | 0.761092191 |
| Derby                | 0.66375781  | 0.675244829 | 0.679804922 | 0.681670345 | 0.682776978 | 0.687972343 | 0.694885943 | 0.700858047 | 0.70572986  | 0.709677893 | 0.713117754 | 0.716428278 | 0.718992105 | 0.722253106 | 0.725645176 | 0.729286457 | 0.734133474 | 0.740362913 | 0.747124171 | 0.753028474 | 0.757013791  | 0.759883575 | 0.763064357 | 0.766716021 | 0.77126951  |
| Derbyshire           | 0.659306813 | 0.66658993  | 0.671161189 | 0.673173141 | 0.675438739 | 0.680421464 | 0.686112619 | 0.691283402 | 0.695122571 | 0.697872077 | 0.700226339 | 0.702379712 | 0.704129081 | 0.706900403 | 0.71005267  | 0.713327582 | 0.717621039 | 0.722723128 | 0.72793759  | 0.732604274 | 0.737976543  | 0.739890929 | 0.742314924 | 0.74595770  | 0.750737544 |
| Leicester            | 0.634886977 | 0.643574617 | 0.648870792 | 0.650764486 | 0.653083737 | 0.658942582 | 0.666501206 | 0.67227382  | 0.677901783 | 0.681986316 | 0.686116873 | 0.69022811  | 0.694466682 | 0.698833841 | 0.703696103 | 0.709100479 | 0.714837923 | 0.720494944 | 0.72658961  | 0.73189577  | 0.73508537   | 0.739395071 | 0.743466264 | 0.748201117 | 0.753065514 |
| Leicestershire       | 0.65908693  | 0.670169851 | 0.676155789 | 0.678027574 | 0.680479103 | 0.68585412  | 0.692122614 | 0.697577148 | 0.702493981 | 0.712351054 | 0.716436639 | 0.730711661 | 0.73846392  | 0.74165062  | 0.745400162 | 0.749605138 | 0.754437304 | 0.759361124 | 0.764242331 | 0.76835006  | 0.771947325  | 0.775140549 | 0.778962984 | 0.782224664 | 0.78641932  |
| Lincolnshire         | 0.660847176 | 0.668165338 | 0.67276943  | 0.676877294 | 0.678873734 | 0.681780901 | 0.687792255 | 0.692233334 | 0.695759446 | 0.698145337 | 0.700989683 | 0.705159141 | 0.707550914 | 0.707520088 | 0.709351076 | 0.713279193 | 0.717357606 | 0.721714956 | 0.726545565 | 0.731051075 | 0.734487907  | 0.737540162 | 0.740196708 | 0.742869286 | 0.745813215 |
| Northamptonshire     | 0.674786199 | 0.682421913 | 0.687191498 | 0.689076374 | 0.691273736 | 0.696377481 | 0.702818985 | 0.708019033 | 0.712106036 | 0.714578988 | 0.716444308 | 0.718909488 | 0.71953225  | 0.722288776 | 0.726518145 | 0.731115469 | 0.736430778 | 0.742413863 | 0.748219029 | 0.753153116 | 0.756441719  | 0.759175237 | 0.76204877  | 0.764864513 | 0.768415453 |
| Nottingham           | 0.671064212 | 0.678729713 | 0.683632295 | 0.688184006 | 0.688418662 | 0.693890082 | 0.700581294 | 0.706404558 | 0.710723299 | 0.714563489 | 0.718242003 | 0.721921782 | 0.72554499  | 0.730265993 | 0.735145301 | 0.739549358 | 0.744347228 | 0.749752031 | 0.755622582 | 0.761270252 | 0.767184749  | 0.769870011 | 0.774833163 | 0.780210006 | 0.785993733 |
| Nottinghamshire      | 0.66014475  | 0.667292561 | 0.671829248 | 0.673783332 | 0.676026199 | 0.680975339 | 0.686948792 | 0.691550779 | 0.69525961  | 0.69777903  | 0.700888857 | 0.702412869 | 0.7044673   | 0.70755005  | 0.711552482 | 0.715311951 | 0.71989893  | 0.724606164 | 0.729613544 | 0.734299319 | 0.737770308  | 0.740783285 | 0.74447891  | 0.748548904 | 0.753452554 |
| Orkland              | 0.71127601  | 0.715143701 | 0.721365047 | 0.722818429 | 0.72433512  | 0.728398607 | 0.73350636  | 0.737816778 | 0.74166892  | 0.744842748 | 0.749089096 | 0.751094626 | 0.75400621  | 0.758028363 | 0.762388796 | 0.766192523 | 0.769723391 | 0.772790368 | 0.780391624 | 0.783018585 | 0.785484578  | 0.788474669 | 0.790914093 | 0.793736339 | 0.796781353 |
| East of England      | 0.68297491  | 0.689792310 | 0.694091912 | 0.695724901 | 0.697283263 | 0.702918446 | 0.709232634 | 0.714973714 | 0.718424832 | 0.721292897 | 0.723840809 | 0.726172073 | 0.728513109 | 0.731164274 | 0.734664958 | 0.735140771 | 0.736436515 | 0.7412446   | 0.746566170 | 0.751345668 | 0.756600750  | 0.761739487 | 0.766490579 | 0.771624561 | 0.777315796 |
| H Bedford            | 0.68691758  | 0.690597231 | 0.700125332 | 0.701704403 | 0.702103693 | 0.708145736 | 0.714961351 | 0.720966929 | 0.725896545 | 0.729300664 | 0.73232968  | 0.735139621 | 0.737531109 | 0.741462474 | 0.745646958 | 0.751540771 | 0.756436515 | 0.76112446  | 0.766566170 | 0.771345668 | 0.776173948  | 0.781057957 | 0.785993579 | 0.791022561 | 0.796124561 |
| Cambridgeshire       | 0.72095656  | 0.727059127 | 0.731068767 | 0.732987272 | 0.73534594  | 0.740077469 | 0.746001168 | 0.750849064 | 0.754666322 | 0.757407963 | 0.760166297 | 0.762957164 | 0.765572719 | 0.769513492 | 0.774308746 | 0.779099799 | 0.783985181 | 0.78906669  | 0.794801616 | 0.798821016 | 0.802652426  | 0.805838999 | 0.809458806 | 0.813666046 | 0.81814511  |
| Central Bedfordshire | 0.68887446  | 0.695840758 | 0.700155141 | 0.701660702 | 0.703145747 | 0.708498847 | 0.715118384 | 0.720476437 | 0.724516775 | 0.727260583 | 0.730051159 | 0.732960801 | 0.735761801 | 0.740121669 | 0.745238403 | 0.749851975 | 0.754455551 | 0.759106474 | 0.764070857 | 0.769026203 | 0.772975759  | 0.779945356 | 0.779029842 | 0.782147226 | 0.786078181 |
| Essex                | 0.675151222 | 0.682012831 | 0.68603824  | 0.688028922 | 0.690200064 | 0.695197973 | 0.701547527 | 0.70657322  | 0.710588131 | 0.713414509 | 0.715914139 | 0.717939897 | 0.719759288 | 0.723340025 | 0.727949656 | 0.732584246 | 0.737593163 | 0.742876135 | 0.748338483 | 0.753544414 | 0.757518388  | 0.760376976 | 0.764430182 | 0.768444949 | 0.773439021 |
| Hertfordshire        | 0.725075503 | 0.731156324 | 0.735083072 | 0.73685275  | 0.739055756 | 0.743696238 | 0.749613669 | 0.75491315  | 0.758563717 | 0.76144228  | 0.764270085 | 0.766664878 | 0.768993472 | 0.772830462 | 0.777333859 | 0.781605003 | 0.786069739 | 0.790941758 | 0.796120506 | 0.801069367 | 0.805925951  | 0.810918127 | 0.816073097 | 0.821142625 | 0.826193511 |
| Luton                | 0.654962932 | 0.662957134 | 0.667631487 | 0.668589005 | 0.670229242 | 0.675861774 | 0.690042264 | 0.695048272 | 0.698197908 | 0.704897916 | 0.710417431 | 0.716063221 | 0.720651931 | 0.72605153  | 0.731553074 | 0.737048192 | 0.742635186 | 0.748239634 | 0.753853235 | 0.759325659 | 0.764846086  | 0.769428498 | 0.774097308 | 0.778897939 | 0.783798799 |
| Norfolk              | 0.66562785  | 0.675232869 | 0.676900282 | 0.678647522 | 0.680096544 | 0.688510344 | 0.692251287 | 0.697242242 | 0.701063071 | 0.703678029 | 0.708785767 | 0.70934601  | 0.709937863 | 0.713577734 | 0.718291366 | 0.72251977  | 0.726932383 | 0.731763446 | 0.736790424 | 0.742026703 | 0.745919726  | 0.749228006 | 0.752979265 | 0.757142663 | 0.762415377 |
| Peterborough         | 0.661596828 | 0.669861832 | 0.674604729 | 0.676454024 | 0.677095569 | 0.682540553 | 0.690197058 | 0.696272384 | 0.700630721 | 0.703170619 | 0.705455443 | 0.707915984 | 0.709881893 | 0.713574798 | 0.717621734 | 0.720969113 | 0.724486723 | 0.728629234 | 0.733591239 | 0.738355594 | 0.742688022  | 0.745775996 | 0.749385711 | 0.753029136 | 0.757582605 |
| Southend-on-Sea      | 0.6475814   | 0.654901499 | 0.659511885 | 0.661360489 | 0.663627299 | 0.669091941 | 0.676180983 | 0.682162328 | 0.68662899  | 0.689205962 | 0.691366634 | 0.69275611  | 0.697993965 | 0.702700577 | 0.70721961  | 0.710768644 | 0.714455755 | 0.718963861 | 0.724101622 | 0.72901332  | 0.733065945  | 0.735510225 | 0.739467426 | 0.743882825 | 0.749656444 |
| Suffolk              | 0.66874060  | 0.676018554 | 0.680542769 | 0.681868853 | 0.683566067 | 0.688663686 | 0.695625231 | 0.701140563 | 0.705237462 | 0.70811529  | 0.710900357 | 0.713911834 | 0.715156333 | 0.71903496  | 0.723913544 | 0.728652007 | 0.734038687 | 0.73963303  | 0.74549171  | 0.752279101 | 0.758214522  | 0.762865886 | 0.767621025 | 0.772591691 | 0.777758146 |
| Thurrock             | 0.65779313  | 0.665327241 | 0.670670771 | 0.671773984 | 0.673197384 | 0.678946808 | 0.693984722 | 0.698593246 | 0.699831927 | 0.703078132 | 0.705156333 | 0.70974099  | 0.710894192 | 0.715350784 | 0.72019368  | 0.725551255 | 0.731463085 | 0.737499133 | 0.743943053 | 0.750427075 | 0.756943085  | 0.763498127 | 0.770159164 | 0.776934299 | 0.783818329 |
| Greater London       | 0.73550707  | 0.741837948 | 0.745885665 | 0.745788579 | 0.749850739 | 0.754076472 | 0.75917636  | 0.76468834  | 0.768663992 | 0.77188092  | 0.774975307 | 0.778139783 | 0.78126931  | 0.7859574   | 0.790367391 | 0.79481868  | 0.799834703 | 0.805204307 | 0.810571158 | 0.81566559  | 0.819126417  | 0.824254457 | 0.826380411 | 0.830466975 | 0.835217068 |
| Barking and Dagenham | 0.62504542  | 0.633869229 | 0.638590564 | 0.640518159 | 0.642974088 | 0.648252934 | 0.654611802 | 0.659628442 | 0.663548602 | 0.665995518 | 0.668316385 | 0.67086136  | 0.6731099   | 0.67664716  | 0.680469734 | 0.684001119 | 0.688516583 | 0.694051852 | 0.700205275 | 0.707012651 | 0.7141712554 | 0.721545334 | 0.729072721 | 0.732505047 | 0.736521788 |
| Barnet               | 0.727423101 | 0.728114411 | 0.732135008 | 0.73427454  | 0.736798998 | 0.741247991 | 0.746223473 | 0.751306255 | 0.755534139 | 0.758757372 | 0.761601776 | 0.764526267 | 0.767948326 | 0.772547515 | 0.777425008 | 0.781612853 | 0.786012382 | 0.790506684 | 0.794961341 | 0.799470411 | 0.804265256  | 0.808683184 | 0.811078659 | 0.815592927 | 0.820328821 |
| Bexley               | 0.669455974 | 0.675883187 | 0.680197766 | 0.682489234 | 0.685122753 | 0.689958656 | 0.69474236  | 0.6980442   | 0.703262408 | 0.70523199  | 0.708134269 | 0.710444428 | 0.71264455  | 0.716309069 | 0.720882626 | 0.725673539 | 0.731228465 | 0.736819431 | 0.742531966 | 0.74726382  | 0.750917475  | 0.754609303 | 0.758369689 | 0.761348999 | 0.766013799 |
| Brent                | 0.688504609 | 0.695678771 | 0.699695903 | 0.701448675 | 0.703622723 | 0.70828133  | 0.715125755 | 0.72064261  | 0.72545373  | 0.72926667  | 0.732769664 | 0.736714187 | 0.740561434 | 0.744582521 | 0.749645758 | 0.754917519 | 0.758736052 | 0.76433359  | 0.768771548 | 0.77390428  | 0.777701947  | 0.781248313 | 0.785590309 | 0.789871932 | 0.794786612 |
| Bromley              | 0.713378284 | 0.719007331 | 0.723116403 | 0.724844148 | 0.726809529 | 0.732573732 | 0.737748149 | 0.741990054 | 0.745646827 | 0.748197908 | 0.750407213 | 0.752788415 | 0.755266681 | 0.759282309 | 0.763993264 | 0.768353433 | 0.77275209  | 0.777301364 | 0.782008383 | 0.786466597 | 0.789948728  | 0.793321616 | 0.797411783 | 0.801741687 | 0.806731006 |
| Camden               | 0.824627218 | 0.830294227 | 0.832871426 | 0.834094814 | 0.83560187  | 0.838711837 | 0.84289712  | 0.84662902  | 0.85006476  | 0.85286672  | 0.854739085 | 0.856926378 | 0.859267    | 0.86128355  | 0.863992199 | 0.866757884 | 0.870073842 | 0.874879908 | 0.879649249 | 0.880212413 | 0.882020773  | 0.883530458 | 0.888101161 | 0.890852059 | 0.893703575 |
| Croydon              | 0.69087916  | 0.697446717 | 0.701690095 | 0.703055081 | 0.706578813 |             |             |             |             |             |             |             |             |             |             |             |             |             |             |             |              |             |             |             |             |

|                           |             |             |             |             |             |             |             |             |             |             |             |             |             |             |             |             |             |             |             |             |             |             |             |             |             |             |
|---------------------------|-------------|-------------|-------------|-------------|-------------|-------------|-------------|-------------|-------------|-------------|-------------|-------------|-------------|-------------|-------------|-------------|-------------|-------------|-------------|-------------|-------------|-------------|-------------|-------------|-------------|-------------|
| Blackburn with Darwen     | 0.622289576 | 0.611655774 | 0.635987084 | 0.636579189 | 0.637548033 | 0.642822739 | 0.650141003 | 0.656121761 | 0.661098284 | 0.664301121 | 0.667513359 | 0.670447877 | 0.672918874 | 0.676828958 | 0.680108255 | 0.682389786 | 0.685731636 | 0.690008092 | 0.695005450 | 0.699698108 | 0.702632559 | 0.7053888   | 0.7088123   | 0.712786846 | 0.718095997 |             |
| Blaupool                  | 0.625674236 | 0.634137321 | 0.638465704 | 0.646030049 | 0.654406413 | 0.648278491 | 0.654868643 | 0.658883492 | 0.661926228 | 0.663923907 | 0.665657554 | 0.667357169 | 0.668584921 | 0.669792481 | 0.671181341 | 0.672552664 | 0.673925266 | 0.675291821 | 0.676650542 | 0.678009338 | 0.679371034 | 0.680732730 | 0.682094426 | 0.683456122 | 0.684817818 | 0.686179514 |
| Bolton                    | 0.645162631 | 0.653102366 | 0.657733718 | 0.658875719 | 0.660288439 | 0.665122189 | 0.67129069  | 0.675622428 | 0.679353869 | 0.682151388 | 0.686049718 | 0.689295292 | 0.691400371 | 0.694485804 | 0.697918118 | 0.701717327 | 0.707123313 | 0.713437318 | 0.719674007 | 0.724604349 | 0.727095634 | 0.728027004 | 0.731464409 | 0.734662473 | 0.739275432 |             |
| Bury                      | 0.666945776 | 0.679629693 | 0.678235303 | 0.678652125 | 0.681344384 | 0.685846107 | 0.691407896 | 0.695465437 | 0.698635188 | 0.700069473 | 0.702695786 | 0.704906643 | 0.70649462  | 0.709223361 | 0.71294179  | 0.717064481 | 0.722315648 | 0.728541718 | 0.734837387 | 0.740145419 | 0.743550793 | 0.746121174 | 0.749191337 | 0.752662934 | 0.757137489 |             |
| Cheshire East             | 0.723144145 | 0.729516894 | 0.733474633 | 0.734978575 | 0.736776022 | 0.740975561 | 0.746037247 | 0.749979301 | 0.752914495 | 0.755219195 | 0.757509715 | 0.759879738 | 0.761792121 | 0.764650991 | 0.768018427 | 0.771746466 | 0.776171884 | 0.781368716 | 0.786529060 | 0.791325813 | 0.794800689 | 0.797627224 | 0.800095963 | 0.804325731 | 0.808972433 |             |
| Cheshire West and Chester | 0.708560027 | 0.715218446 | 0.719072412 | 0.720360594 | 0.721967777 | 0.726236076 | 0.731496372 | 0.735373993 | 0.738813479 | 0.741742003 | 0.743674075 | 0.746140575 | 0.746140575 | 0.746140575 | 0.746140575 | 0.746140575 | 0.746140575 | 0.746140575 | 0.746140575 | 0.746140575 | 0.746140575 | 0.746140575 | 0.746140575 | 0.746140575 | 0.746140575 | 0.746140575 |
| Cumbria                   | 0.672538661 | 0.679590966 | 0.68733287  | 0.687618785 | 0.68911079  | 0.691425188 | 0.696975982 | 0.701102129 | 0.70460335  | 0.707327133 | 0.71048972  | 0.713503528 | 0.715650997 | 0.718516025 | 0.721115255 | 0.723302241 | 0.726945661 | 0.732035222 | 0.738372222 | 0.743815552 | 0.749353996 | 0.754918145 | 0.760477556 | 0.766237076 | 0.772885712 |             |
| Halton                    | 0.652469602 | 0.660767741 | 0.66472351  | 0.666450614 | 0.667658279 | 0.672252298 | 0.678393664 | 0.683235435 | 0.686521247 | 0.688089853 | 0.689232935 | 0.690665601 | 0.692068462 | 0.695714127 | 0.700176283 | 0.704162024 | 0.709000042 | 0.715316123 | 0.722218377 | 0.7283098   | 0.734714288 | 0.736727017 | 0.739207013 | 0.743894489 | 0.749302613 |             |
| Knowsley                  | 0.624102727 | 0.632259500 | 0.636945001 | 0.638011111 | 0.639497837 | 0.644563199 | 0.651078915 | 0.655980904 | 0.660820537 | 0.664653592 | 0.667825655 | 0.671473248 | 0.674295911 | 0.677240136 | 0.680203498 | 0.68225195  | 0.687997471 | 0.693783342 | 0.698981688 | 0.703117436 | 0.706617182 | 0.709445554 | 0.713689691 | 0.717494486 | 0.722186227 |             |
| Lancashire                | 0.673872551 | 0.6811868   | 0.68590055  | 0.686971387 | 0.688678399 | 0.693337228 | 0.699089634 | 0.703331564 | 0.707022174 | 0.709950092 | 0.712324549 | 0.715362428 | 0.717358692 | 0.720325905 | 0.723927274 | 0.727956978 | 0.733591254 | 0.740115399 | 0.746543407 | 0.751957131 | 0.755323739 | 0.759282128 | 0.763193564 | 0.767055881 | 0.769850615 |             |
| Liverpool                 | 0.660790207 | 0.668005731 | 0.672542960 | 0.674450237 | 0.676885878 | 0.681922416 | 0.688796554 | 0.692463375 | 0.696352071 | 0.699253219 | 0.703097414 | 0.702234734 | 0.711187186 | 0.716108192 | 0.720688611 | 0.725467323 | 0.731475935 | 0.737600847 | 0.743302062 | 0.748075937 | 0.753180354 | 0.758491397 | 0.763974076 | 0.769517907 | 0.773306960 |             |
| Manchester                | 0.680496455 | 0.688004737 | 0.692687966 | 0.694470465 | 0.696717614 | 0.702872283 | 0.710329613 | 0.719012566 | 0.728477009 | 0.726859929 | 0.730244118 | 0.73426115  | 0.738879935 | 0.742927951 | 0.746647618 | 0.751705623 | 0.759279193 | 0.764651684 | 0.77085992  | 0.77441989  | 0.779431819 | 0.784425045 | 0.790043364 | 0.796379233 | 0.803261767 |             |
| Oldham                    | 0.626870004 | 0.635017917 | 0.639681128 | 0.640631064 | 0.642006631 | 0.646912064 | 0.653311188 | 0.658019277 | 0.661874411 | 0.666410566 | 0.671447467 | 0.676993905 | 0.682496174 | 0.687624071 | 0.692374074 | 0.69719254  | 0.702118525 | 0.70700928  | 0.711946848 | 0.716831137 | 0.721705028 | 0.726564043 | 0.731416719 | 0.736235367 | 0.741031761 |             |
| Rochdale                  | 0.631042934 | 0.639131038 | 0.643844233 | 0.644979869 | 0.646382508 | 0.651285938 | 0.65761642  | 0.662417826 | 0.666177037 | 0.668005033 | 0.670895864 | 0.672940704 | 0.67444290  | 0.677161222 | 0.679946828 | 0.682495148 | 0.686914997 | 0.692740297 | 0.6986136   | 0.7049136   | 0.70786881  | 0.710105757 | 0.713178503 | 0.716891    | 0.72222793  |             |
| Salford                   | 0.652242316 | 0.660012919 | 0.664498388 | 0.665634937 | 0.667221387 | 0.672240313 | 0.678601933 | 0.683254404 | 0.687244294 | 0.689932473 | 0.692676526 | 0.695921869 | 0.698079446 | 0.701322922 | 0.70485491  | 0.707740126 | 0.712145618 | 0.718390732 | 0.725411036 | 0.731641191 | 0.735455032 | 0.737306    | 0.740745454 | 0.745601195 | 0.75253971  |             |
| Selton                    | 0.66593828  | 0.672662922 | 0.676021916 | 0.678616262 | 0.680590262 | 0.685103163 | 0.690530815 | 0.694601118 | 0.69811698  | 0.70087485  | 0.70357637  | 0.706277387 | 0.70833442  | 0.711011022 | 0.714590404 | 0.718754028 | 0.724685208 | 0.73131607  | 0.738400071 | 0.742959004 | 0.749292022 | 0.754811593 | 0.75185561  | 0.756073253 | 0.760803623 |             |
| St Helens                 | 0.64008971  | 0.647526903 | 0.651893848 | 0.65308233  | 0.654590323 | 0.65936018  | 0.665435233 | 0.671062322 | 0.67580035  | 0.678577518 | 0.680829267 | 0.683682402 | 0.685819436 | 0.688896918 | 0.69176922  | 0.694236831 | 0.69856037  | 0.70405114  | 0.710740518 | 0.71592096  | 0.718794057 | 0.721045314 | 0.723957516 | 0.727435623 | 0.732628008 |             |
| Stockport                 | 0.698009536 | 0.703644776 | 0.708709095 | 0.710615297 | 0.711883779 | 0.716306198 | 0.721755571 | 0.726077088 | 0.729729411 | 0.73232715  | 0.7347552   | 0.736699765 | 0.738857765 | 0.741851602 | 0.744725913 | 0.751609941 | 0.757002626 | 0.763161137 | 0.769049941 | 0.773973048 | 0.77900491  | 0.784275104 | 0.789643222 | 0.794141208 | 0.798895544 |             |
| Tameside                  | 0.636791833 | 0.640778424 | 0.64943368  | 0.650828142 | 0.652514483 | 0.657501878 | 0.663772557 | 0.668363093 | 0.672100052 | 0.674571794 | 0.677386543 | 0.679793595 | 0.681130111 | 0.684128613 | 0.687094973 | 0.690169022 | 0.694969594 | 0.70111587  | 0.707610216 | 0.713230143 | 0.718899481 | 0.720061881 | 0.723720255 | 0.727376926 | 0.732912994 |             |
| Trafford                  | 0.727642531 | 0.73417407  | 0.738178732 | 0.739679198 | 0.741493421 | 0.74587759  | 0.751234671 | 0.75531117  | 0.758872074 | 0.76156352  | 0.764282338 | 0.767201919 | 0.769976596 | 0.773733062 | 0.77796702  | 0.781976839 | 0.78671279  | 0.792185092 | 0.797857675 | 0.802838184 | 0.808630374 | 0.8097728   | 0.811221939 | 0.815846012 | 0.82081479  |             |
| Warrington                | 0.704077446 | 0.71164746  | 0.715749155 | 0.718644433 | 0.721821674 | 0.72596246  | 0.728191997 | 0.732432466 | 0.735730447 | 0.738666098 | 0.741612933 | 0.743924248 | 0.745894194 | 0.74955784  | 0.753665102 | 0.757525219 | 0.762524005 | 0.768492764 | 0.774419948 | 0.778864593 | 0.781605683 | 0.784306462 | 0.786230134 | 0.789247245 | 0.794297245 |             |
| Wigan                     | 0.63742214  | 0.645128133 | 0.649597156 | 0.65091452  | 0.653479562 | 0.657206981 | 0.663357589 | 0.667979065 | 0.672045997 | 0.67536882  | 0.678945365 | 0.681661625 | 0.684074921 | 0.687031245 | 0.690556798 | 0.6938514   | 0.698265316 | 0.704307267 | 0.710230964 | 0.7151698   | 0.71806321  | 0.720996484 | 0.724216273 | 0.727230537 | 0.731621727 |             |
| Wirral                    | 0.65447239  | 0.661653783 | 0.667818763 | 0.67018622  | 0.673661996 | 0.679073689 | 0.683573508 | 0.688793819 | 0.694194859 | 0.699816628 | 0.705691809 | 0.711851693 | 0.718410635 | 0.72524071  | 0.732199517 | 0.739320626 | 0.746710331 | 0.754229513 | 0.761904941 | 0.770099481 | 0.77847163  | 0.787042933 | 0.79592335  | 0.80440339  | 0.812750385 |             |
| South East England        | 0.721427058 | 0.727006672 | 0.730606254 | 0.731944157 | 0.733671145 | 0.737924372 | 0.743549611 | 0.748192363 | 0.753190020 | 0.754478619 | 0.75690053  | 0.758912706 | 0.760992911 | 0.764415286 | 0.768630707 | 0.772790662 | 0.777244962 | 0.781939055 | 0.786726875 | 0.791151604 | 0.794546578 | 0.797511116 | 0.801016407 | 0.804897274 | 0.809951967 |             |
| Bracknell Forest          | 0.735496194 | 0.741147601 | 0.744413549 | 0.745325631 | 0.746693939 | 0.750870415 | 0.756683098 | 0.761683124 | 0.766180798 | 0.769761488 | 0.772781875 | 0.775286615 | 0.777221584 | 0.780432183 | 0.784402107 | 0.78835599  | 0.792376918 | 0.796362939 | 0.800201995 | 0.80372608  | 0.806494029 | 0.809234574 | 0.812806613 | 0.817805183 | 0.822449514 |             |
| Brighton and Hove         | 0.7324381   | 0.737388183 | 0.741085233 | 0.743545451 | 0.746437054 | 0.750889589 | 0.756082488 | 0.762752275 | 0.764512265 | 0.767820766 | 0.771031528 | 0.774735301 | 0.777907068 | 0.782579994 | 0.787821225 | 0.792979318 | 0.79760676  | 0.802828163 | 0.80969134  | 0.811921026 | 0.81578978  | 0.819632811 | 0.823822985 | 0.828131446 | 0.832808187 |             |
| Blackburnham              | 0.748151934 | 0.752385434 | 0.756675152 | 0.757884501 | 0.75951169  | 0.763478809 | 0.768745777 | 0.773273077 | 0.777027084 | 0.779666699 | 0.782193729 | 0.784516279 | 0.786385939 | 0.788900644 | 0.792242059 | 0.795667014 | 0.79972445  | 0.804515368 | 0.80856631  | 0.812172818 | 0.816479921 | 0.819472258 | 0.822748524 | 0.826370169 | 0.830647683 |             |
| East Sussex               | 0.676190321 | 0.682252478 | 0.686169488 | 0.687815767 | 0.689794697 | 0.694361249 | 0.700211262 | 0.704945592 | 0.708603984 | 0.711210214 | 0.713607145 | 0.715561423 | 0.717281137 | 0.720726938 | 0.725110334 | 0.729563972 | 0.734239331 | 0.739055297 | 0.743947260 | 0.748758411 | 0.752523436 | 0.756536973 | 0.758712415 | 0.762533885 | 0.767349638 |             |
| Hampshire                 | 0.72021626  | 0.728195212 | 0.729232636 | 0.730294211 | 0.731724244 | 0.735834013 | 0.741420111 | 0.745932626 | 0.749578187 | 0.752157991 | 0.754832391 | 0.756466555 | 0.758316264 | 0.76206742  | 0.766264559 | 0.770597431 | 0.775101568 | 0.779925051 | 0.78466317  | 0.788247941 | 0.791303029 | 0.793966373 | 0.797391318 | 0.800995234 | 0.805765068 |             |
| Isle of Wight             | 0.65709164  | 0.663548182 | 0.667440721 | 0.668672903 | 0.670626165 | 0.674827662 | 0.680936194 | 0.685994412 | 0.689162787 | 0.691091199 | 0.692575104 | 0.694114258 | 0.695490485 | 0.699551845 | 0.70411063  | 0.708723981 | 0.71354308  | 0.718447987 | 0.724477118 | 0.728675559 | 0.732199272 | 0.735667866 | 0.740313162 | 0.744732602 | 0.749573523 |             |
| Kent                      | 0.688069789 | 0.694219603 | 0.697988923 | 0.699290599 |             |             |             |             |             |             |             |             |             |             |             |             |             |             |             |             |             |             |             |             |             |             |



|                             |             |             |             |             |             |             |             |             |             |             |             |             |             |             |             |             |             |             |             |             |             |             |             |             |             |
|-----------------------------|-------------|-------------|-------------|-------------|-------------|-------------|-------------|-------------|-------------|-------------|-------------|-------------|-------------|-------------|-------------|-------------|-------------|-------------|-------------|-------------|-------------|-------------|-------------|-------------|-------------|
| Walsall                     | 0.62488714  | 0.63388885  | 0.63796713  | 0.63945703  | 0.64127281  | 0.64629310  | 0.65210316  | 0.65164165  | 0.65978168  | 0.66256738  | 0.66557615  | 0.66871944  | 0.67019120  | 0.67394510  | 0.67654204  | 0.67868011  | 0.68177826  | 0.68645499  | 0.69228226  | 0.69683385  | 0.698847612 | 0.69953052  | 0.70106263  | 0.70401782  | 0.70890276  |
| Warwickshire                | 0.70039589  | 0.70274002  | 0.71165448  | 0.71341375  | 0.71549481  | 0.72010115  | 0.72538707  | 0.72945595  | 0.73321523  | 0.73595437  | 0.73908336  | 0.73992861  | 0.74180688  | 0.74497409  | 0.74871938  | 0.75308539  | 0.75870521  | 0.76423811  | 0.76922466  | 0.77381492  | 0.77715759  | 0.78000855  | 0.78351563  | 0.78751948  | 0.79220704  |
| Wolverhampton               | 0.63488351  | 0.64318920  | 0.64809307  | 0.64956483  | 0.65138712  | 0.65688277  | 0.66286803  | 0.66770324  | 0.67210760  | 0.67542133  | 0.67855267  | 0.68112903  | 0.68262467  | 0.68567609  | 0.68896341  | 0.69213364  | 0.69683429  | 0.70263252  | 0.70916593  | 0.71513499  | 0.71829919  | 0.72030557  | 0.7235514   | 0.72762618  | 0.73361519  |
| Worcestershire              | 0.68025268  | 0.68742342  | 0.69197338  | 0.69385524  | 0.69592209  | 0.70062294  | 0.70578657  | 0.70966596  | 0.71327098  | 0.71596559  | 0.71819387  | 0.71999311  | 0.72120339  | 0.72414341  | 0.72786069  | 0.73175694  | 0.73668614  | 0.74149891  | 0.74666705  | 0.75116511  | 0.75451546  | 0.75684129  | 0.76053248  | 0.76511163  | 0.77225283  |
| Yorkshire and the Humber    | 0.65922649  | 0.66663935  | 0.67125308  | 0.67670170  | 0.68217331  | 0.68844991  | 0.69116558  | 0.69519786  | 0.69827659  | 0.70121236  | 0.70389106  | 0.70653896  | 0.71019067  | 0.71399341  | 0.71744891  | 0.72194248  | 0.72722403  | 0.73271256  | 0.7376591   | 0.74190929  | 0.74621366  | 0.74893192  | 0.75224852  | 0.75764663  |             |
| Barnsley                    | 0.62054902  | 0.62832196  | 0.63304438  | 0.63553122  | 0.63639604  | 0.64151851  | 0.64792155  | 0.65274858  | 0.65675489  | 0.66001549  | 0.66297968  | 0.66560477  | 0.66800421  | 0.67097165  | 0.67322365  | 0.67449297  | 0.67729760  | 0.68214309  | 0.68778018  | 0.69211744  | 0.69445174  | 0.69706072  | 0.70110828  | 0.70526609  | 0.71064237  |
| Bradford                    | 0.63429734  | 0.64267853  | 0.64701422  | 0.64832566  | 0.64963913  | 0.654861109 | 0.661719679 | 0.66700275  | 0.671483114 | 0.67500555  | 0.67861924  | 0.68255015  | 0.68516913  | 0.68915961  | 0.69228636  | 0.69577176  | 0.69927234  | 0.70442799  | 0.71008432  | 0.71404834  | 0.71810093  | 0.72120386  | 0.72491768  | 0.72944192  |             |
| Caldesdale                  | 0.66146544  | 0.66916508  | 0.67384072  | 0.67533955  | 0.67710349  | 0.68207535  | 0.68828432  | 0.692570852 | 0.69612849  | 0.69874647  | 0.70164257  | 0.70434084  | 0.7065321   | 0.710082193 | 0.713994537 | 0.71758321  | 0.72220176  | 0.727794375 | 0.733498025 | 0.738242957 | 0.740885394 | 0.743001819 | 0.746067255 | 0.749534048 | 0.754305043 |
| Doncaster                   | 0.62362608  | 0.63151219  | 0.636063702 | 0.637219662 | 0.637839909 | 0.64369006  | 0.64996562  | 0.65484218  | 0.658158295 | 0.66088274  | 0.662815707 | 0.665084613 | 0.66753264  | 0.670812828 | 0.67326564  | 0.67516052  | 0.678434292 | 0.682996246 | 0.68802272  | 0.692463822 | 0.694956323 | 0.696769069 | 0.699423852 | 0.703136651 | 0.708291833 |
| East Riding of Yorkshire    | 0.67956110  | 0.68636444  | 0.69071392  | 0.69258432  | 0.694791902 | 0.699483358 | 0.705007175 | 0.709205469 | 0.7126438   | 0.715024616 | 0.717040481 | 0.718845628 | 0.720592174 | 0.723422251 | 0.726517608 | 0.72949586  | 0.734058197 | 0.739801277 | 0.745398199 | 0.75005423  | 0.75203417  | 0.75508404  | 0.759027005 | 0.76235921  | 0.767140291 |
| Kingston upon Hull, City of | 0.62403402  | 0.632292156 | 0.63728665  | 0.63890149  | 0.640842828 | 0.646225137 | 0.652942014 | 0.65727289  | 0.66143035  | 0.663679192 | 0.66653195  | 0.668118977 | 0.670958669 | 0.673071442 | 0.67880347  | 0.68194242  | 0.68603385  | 0.691360749 | 0.69685884  | 0.702080829 | 0.70345317  | 0.708842146 | 0.713685639 | 0.719337197 | 0.725860074 |
| Kirkcaldy                   | 0.65143151  | 0.65980879  | 0.66370482  | 0.66520128  | 0.667108138 | 0.67220500  | 0.678478236 | 0.68317317  | 0.687395957 | 0.69101382  | 0.69418779  | 0.697207152 | 0.70019757  | 0.70418326  | 0.70760555  | 0.71094828  | 0.71595529  | 0.72127867  | 0.72728423  | 0.734149351 | 0.741138842 | 0.74832606  | 0.75592760  | 0.76425496  | 0.77320177  |
| Leeds                       | 0.6913931   | 0.69871806  | 0.70308922  | 0.70629088  | 0.70730039  | 0.71224205  | 0.71831387  | 0.72423822  | 0.731388525 | 0.73677896  | 0.739757693 | 0.74388184  | 0.74665102  | 0.752340826 | 0.757804729 | 0.764464312 | 0.77298280  | 0.77521036  | 0.77927487  | 0.78217247  | 0.7872104   | 0.79254593  | 0.79795548  |             |             |
| North East Lincolnshire     | 0.62695295  | 0.63540052  | 0.64119808  | 0.641134949 | 0.64235970  | 0.647451981 | 0.654133989 | 0.658907866 | 0.662328    | 0.66490481  | 0.66573634  | 0.667410571 | 0.66868957  | 0.671786636 | 0.67529662  | 0.67951747  | 0.685012163 | 0.691269153 | 0.697182622 | 0.702389449 | 0.70504761  | 0.70733487  | 0.710493044 | 0.713452048 | 0.71885014  |
| North Lincolnshire          | 0.67144453  | 0.67914896  | 0.68379929  | 0.68851129  | 0.68549574  | 0.69058956  | 0.696740654 | 0.701192761 | 0.70453465  | 0.706846915 | 0.70927734  | 0.711474854 | 0.71300616  | 0.715495573 | 0.718647306 | 0.721491375 | 0.728986018 | 0.729588766 | 0.73476149  | 0.739194201 | 0.74239997  | 0.745328254 | 0.748478341 | 0.7514857   | 0.754669264 |
| North Yorkshire             | 0.69599588  | 0.705156054 | 0.705770574 | 0.70756697  | 0.70964397  | 0.714190562 | 0.719627232 | 0.72400205  | 0.727701747 | 0.73046098  | 0.732922683 | 0.734939501 | 0.736578434 | 0.739328477 | 0.742653356 | 0.746009817 | 0.750306404 | 0.755072311 | 0.759882811 | 0.763926127 | 0.766510062 | 0.768917455 | 0.772331385 | 0.77626258  | 0.781084212 |
| Rotherham                   | 0.632401962 | 0.64008706  | 0.64467752  | 0.64606566  | 0.64777515  | 0.65273301  | 0.658919472 | 0.66354508  | 0.667151256 | 0.669815713 | 0.67232261  | 0.674729601 | 0.6763149   | 0.67895396  | 0.681671068 | 0.684048953 | 0.688005253 | 0.693073788 | 0.69868561  | 0.70387979  | 0.708812985 | 0.709661667 | 0.712089621 | 0.715385087 | 0.71998409  |
| Sheffield                   | 0.68414212  | 0.69052984  | 0.69481714  | 0.69750384  | 0.69976635  | 0.704543165 | 0.709878349 | 0.713883602 | 0.7173348   | 0.72039368  | 0.723113416 | 0.725911061 | 0.729020227 | 0.733092599 | 0.737276286 | 0.74499332  | 0.754668329 | 0.757194945 | 0.763734483 | 0.767149838 | 0.770746987 | 0.774813454 | 0.77964325  | 0.78540734  | 0.792860042 |
| Wakefield                   | 0.638052704 | 0.645986156 | 0.650779505 | 0.65230166  | 0.65414291  | 0.659334712 | 0.66885431  | 0.67077065  | 0.67481846  | 0.677952294 | 0.680040285 | 0.682320619 | 0.68411551  | 0.68687013  | 0.689723832 | 0.694263647 | 0.69653247  | 0.701823136 | 0.707800514 | 0.713152829 | 0.716363594 | 0.719061388 | 0.722368367 | 0.725655502 | 0.730273977 |
| York                        | 0.728791465 | 0.734709865 | 0.738778203 | 0.74100963  | 0.743613407 | 0.748141593 | 0.753303075 | 0.757511335 | 0.761324295 | 0.764541979 | 0.76758244  | 0.770593914 | 0.773673137 | 0.777873025 | 0.782495084 | 0.78714203  | 0.792373666 | 0.797581364 | 0.802280585 | 0.806402138 | 0.809928483 | 0.81334821  | 0.81726674  | 0.82163474  | 0.826269566 |
| Northern Ireland            | 0.653098705 | 0.658238832 | 0.661547301 | 0.662705243 | 0.66428302  | 0.667051078 | 0.673205422 | 0.679866375 | 0.70398264  | 0.708457223 | 0.713610632 | 0.71779595  | 0.72245876  | 0.726160912 | 0.73106519  | 0.73546681  | 0.74015662  | 0.747974024 | 0.74822001  | 0.75417015  | 0.75954392  | 0.76489028  | 0.76863789  | 0.771562527 | 0.77465009  |
| Scotland                    | 0.674062121 | 0.68222805  | 0.687151073 | 0.69032022  | 0.693265344 | 0.697866375 | 0.70398264  | 0.708457223 | 0.713610632 | 0.71779595  | 0.72245876  | 0.726160912 | 0.73106519  | 0.73546681  | 0.74015662  | 0.747974024 | 0.74822001  | 0.75417015  | 0.75954392  | 0.76489028  | 0.76863789  | 0.771562527 | 0.77465009  | 0.77959491  | 0.78315942  |
| Wales                       | 0.64827763  | 0.65551021  | 0.66051078  | 0.66159301  | 0.66319694  | 0.66879095  | 0.67526149  | 0.68376925  | 0.69292458  | 0.70343186  | 0.71480254  | 0.72706319  | 0.74038434  | 0.75466813  | 0.76965933  | 0.78479374  | 0.79474806  | 0.810370541 | 0.82639855  | 0.8404867   | 0.85475328  | 0.8694939   | 0.88519394  | 0.90159394  |             |
| Latin America and Caribbean | 0.40038381  | 0.411017814 | 0.418340727 | 0.425829887 | 0.43383466  | 0.440743884 | 0.447621896 | 0.454274731 | 0.460548901 | 0.466731188 | 0.472671295 | 0.478548541 | 0.484067874 | 0.489101581 | 0.493628183 | 0.49773892  | 0.501730503 | 0.505674834 | 0.509875876 | 0.51433915  | 0.518546498 | 0.522873273 | 0.527604    | 0.532559233 | 0.537509233 |
| Andean Latin America        | 0.410742754 | 0.418570112 | 0.426284844 | 0.433083959 | 0.442070054 | 0.450259122 | 0.45782167  | 0.464925657 | 0.470919908 | 0.47631604  | 0.48174227  | 0.487435915 | 0.492942412 | 0.496878965 | 0.49868693  | 0.50001149  | 0.501652202 | 0.50365586  | 0.506338431 | 0.510305574 | 0.514896344 | 0.519376447 | 0.52403649  | 0.528443969 | 0.532743717 |
| Bolivia                     | 0.348573006 | 0.35176153  | 0.357739647 | 0.363489399 | 0.369190547 | 0.374807433 | 0.380597944 | 0.38954516  | 0.39094602  | 0.3954743   | 0.40077903  | 0.405084334 | 0.409534903 | 0.413982576 | 0.418755154 | 0.423917961 | 0.429397795 | 0.434835542 | 0.440601646 | 0.4468225   | 0.45347943  | 0.46022660  | 0.466982897 | 0.473479620 | 0.48019431  |
| Ecuador                     | 0.433668943 | 0.443142907 | 0.45117698  | 0.459989681 | 0.46927744  | 0.478175884 | 0.486143026 | 0.492879092 | 0.499066121 | 0.503656832 | 0.508317601 | 0.514307961 | 0.518982285 | 0.520893165 | 0.520092626 | 0.518430614 | 0.516769421 | 0.51837907  | 0.520707291 | 0.524908291 | 0.529380359 | 0.532691392 | 0.535349652 | 0.53719633  | 0.539032806 |
| Peru                        | 0.417704545 | 0.42521927  | 0.432991227 | 0.440808807 | 0.44891626  | 0.457002154 | 0.465012717 | 0.472474999 | 0.478506764 | 0.484411304 | 0.489951761 | 0.495619494 | 0.50117118  | 0.506331065 | 0.508667775 | 0.510419852 | 0.512161325 | 0.513821552 | 0.515981506 | 0.51930608  | 0.523460257 | 0.528312049 | 0.53376491  | 0.53872171  | 0.543782194 |
| Caribbean                   | 0.426671613 | 0.435999962 | 0.445261908 | 0.453975385 | 0.461868791 | 0.468847315 | 0.474107305 | 0.479174357 | 0.484564107 | 0.490224429 | 0.49571101  | 0.500821881 | 0.5061308   | 0.511350099 | 0.518111381 | 0.522788386 | 0.526984192 | 0.53006768  | 0.53384181  | 0.536650593 | 0.53975932  | 0.54302868  | 0.547566066 | 0.552006172 |             |
| Antigua and Barbuda         | 0.506683804 | 0.50941268  | 0.513944636 | 0.519259299 | 0.526509586 | 0.534534569 | 0.542772061 | 0.551210415 | 0.559292499 | 0.567122994 | 0.575214632 | 0.58380438  | 0.59166354  | 0.598827628 | 0.60535671  | 0.61210495  | 0.618817129 | 0.624693818 | 0.630765854 | 0.63476995  | 0.63800829  | 0.641647192 | 0.645895991 | 0.650614287 | 0.655345994 |
| The Bahamas                 | 0.605786239 | 0.60952922  | 0.60980876  | 0.61218986  | 0.61602361  | 0.6205622   | 0.626490994 | 0.634072041 | 0.644065709 | 0.65595118  | 0.669925723 | 0.68082487  | 0.68809996  | 0.691915792 | 0.69416073  | 0.69950268  | 0.698126784 | 0.68734388  | 0.69381056  | 0.700818992 | 0.719381607 | 0.72844884  | 0.734781215 | 0.739821293 | 0.746212848 |
| Barbados                    | 0.57192308  | 0.58496773  | 0.591249017 | 0.5961      |             |             |             |             |             |             |             |             |             |             |             |             |             |             |             |             |             |             |             |             |             |





|                            |             |             |             |             |             |             |             |             |             |             |             |             |             |             |             |             |             |             |             |             |             |             |             |             |             |             |
|----------------------------|-------------|-------------|-------------|-------------|-------------|-------------|-------------|-------------|-------------|-------------|-------------|-------------|-------------|-------------|-------------|-------------|-------------|-------------|-------------|-------------|-------------|-------------|-------------|-------------|-------------|-------------|
| Kermanshah                 | 0.273564993 | 0.280029998 | 0.284308154 | 0.279676294 | 0.264606203 | 0.246382552 | 0.242399989 | 0.251041992 | 0.267473442 | 0.282786199 | 0.30226832  | 0.322252259 | 0.344848164 | 0.364275119 | 0.385043512 | 0.404063229 | 0.418946649 | 0.430677775 | 0.442946994 | 0.456671649 | 0.470161592 | 0.482910249 | 0.493315934 | 0.502877113 | 0.512766657 |             |
| Khorasan-e-Razavi          | 0.278115899 | 0.283144631 | 0.284242601 | 0.276447973 | 0.253229505 | 0.22385901  | 0.215009093 | 0.226306005 | 0.247119345 | 0.269625754 | 0.282989765 | 0.312721695 | 0.338210052 | 0.366246414 | 0.382670827 | 0.40318232  | 0.419388951 | 0.431379703 | 0.443316533 | 0.456254866 | 0.469991438 | 0.480004775 | 0.488658904 | 0.496687256 | 0.504520724 |             |
| Khuzestan                  | 0.272325168 | 0.278112711 | 0.281409574 | 0.272840893 | 0.248290997 | 0.219048678 | 0.210671227 | 0.222870614 | 0.244640137 | 0.268194305 | 0.288139735 | 0.312590054 | 0.336601145 | 0.363920718 | 0.384443598 | 0.411717104 | 0.430329418 | 0.444092399 | 0.457051262 | 0.471014342 | 0.484259839 | 0.495041354 | 0.503511676 | 0.511585072 | 0.520772892 |             |
| Kohgiluyeh and Boyer-Ahmad | 0.273292848 | 0.283468034 | 0.274957478 | 0.24162566  | 0.220283037 | 0.192515236 | 0.18218475  | 0.194248408 | 0.213764997 | 0.237412453 | 0.258717512 | 0.284422352 | 0.312617712 | 0.337835593 | 0.362657643 | 0.385444629 | 0.403033901 | 0.416642534 | 0.430713179 | 0.446547889 | 0.462229475 | 0.476127421 | 0.487763929 | 0.499302617 | 0.510127379 |             |
| Kurdistan                  | 0.229293839 | 0.234621095 | 0.238194385 | 0.234652119 | 0.222922077 | 0.207900644 | 0.203843493 | 0.201037345 | 0.222803648 | 0.237407099 | 0.251535881 | 0.26893998  | 0.288363603 | 0.307496119 | 0.327039396 | 0.34632778  | 0.362447303 | 0.374440307 | 0.38862839  | 0.402963883 | 0.416962406 | 0.429685212 | 0.440474448 | 0.450905635 | 0.461917212 |             |
| Lorestan                   | 0.23836216  | 0.243455103 | 0.246029608 | 0.237741005 | 0.213674699 | 0.183168616 | 0.172267744 | 0.18332035  | 0.204798452 | 0.228289793 | 0.248155637 | 0.272892127 | 0.300119586 | 0.324718110 | 0.349296601 | 0.372692648 | 0.391835023 | 0.407133613 | 0.422519576 | 0.439322885 | 0.456492323 | 0.470440229 | 0.482000472 | 0.493415816 | 0.505667657 |             |
| Mazandaran                 | 0.297174638 | 0.305186996 | 0.310981544 | 0.309498959 | 0.289134231 | 0.267799896 | 0.254461133 | 0.309042452 | 0.324569909 | 0.339227552 | 0.359866216 | 0.375834526 | 0.393897788 | 0.412690417 | 0.431126436 | 0.446318425 | 0.458666422 | 0.471251664 | 0.484831548 | 0.497575983 | 0.509699596 | 0.520238798 | 0.530425595 | 0.540916642 | 0.549916412 |             |
| Mazandaran                 | 0.348223725 | 0.356638532 | 0.363044116 | 0.361892797 | 0.33239617  | 0.342072791 | 0.341763318 | 0.36738982  | 0.385627242 | 0.402786162 | 0.422419451 | 0.443860411 | 0.464835072 | 0.484410206 | 0.504272331 | 0.520307133 | 0.532162754 | 0.543172259 | 0.554838776 | 0.566985363 | 0.574534717 | 0.581401075 | 0.587722361 | 0.594408312 | 0.599431822 |             |
| North Khuzestan            | 0.215206206 | 0.219874482 | 0.221991799 | 0.212426534 | 0.183948393 | 0.141768587 | 0.120561228 | 0.13406217  | 0.164560662 | 0.193533211 | 0.216281115 | 0.244113357 | 0.27387687  | 0.29964505  | 0.324724417 | 0.347842505 | 0.365866242 | 0.37902068  | 0.391915395 | 0.406447733 | 0.420753657 | 0.432532156 | 0.4435523   | 0.454431491 | 0.464441353 |             |
| Qazvin                     | 0.271768524 | 0.283715583 | 0.287673451 | 0.283308393 | 0.267084532 | 0.250712864 | 0.247196394 | 0.256198326 | 0.272544699 | 0.291277075 | 0.308605923 | 0.329465021 | 0.3524539   | 0.373265033 | 0.393895581 | 0.413743666 | 0.42875875  | 0.439910271 | 0.450246346 | 0.461099117 | 0.471356031 | 0.480610703 | 0.48819092  | 0.497443183 | 0.506789985 |             |
| Qom                        | 0.32665217  | 0.334066124 | 0.339418989 | 0.336144031 | 0.313219560 | 0.308695661 | 0.305210325 | 0.31261093  | 0.326967818 | 0.343576451 | 0.359011699 | 0.37445552  | 0.397973178 | 0.416949319 | 0.43390785  | 0.452628907 | 0.465722037 | 0.478802921 | 0.48824484  | 0.49840084  | 0.510319504 | 0.521960267 | 0.530026839 | 0.5382674   | 0.546771234 |             |
| Semnan                     | 0.35891474  | 0.368412214 | 0.37634748  | 0.377599253 | 0.372385118 | 0.367201216 | 0.36989336  | 0.379552597 | 0.393534190 | 0.408279049 | 0.422047232 | 0.43728067  | 0.45309547  | 0.468309181 | 0.486890845 | 0.505579479 | 0.51270331  | 0.527036934 | 0.531025311 | 0.539840326 | 0.549411625 | 0.559946112 | 0.566637746 | 0.574628845 | 0.582944073 |             |
| Sistan and Baluchistan     | 0.23097385  | 0.207959633 | 0.209287378 | 0.19931685  | 0.170785166 | 0.126912813 | 0.098775303 | 0.10170468  | 0.138376045 | 0.174211844 | 0.194046704 | 0.210675064 | 0.22876422  | 0.246266306 | 0.2642831   | 0.283680108 | 0.303989214 | 0.324676973 | 0.338299321 | 0.351723462 | 0.366848476 | 0.381150014 | 0.394576411 | 0.410162028 | 0.419502524 |             |
| South Khuzestan            | 0.22407616  | 0.22944482  | 0.232540176 | 0.22695022  | 0.209363353 | 0.18703666  | 0.177925026 | 0.184728728 | 0.201498423 | 0.21195604  | 0.228914597 | 0.260854581 | 0.28255746  | 0.30728272  | 0.329445475 | 0.350446131 | 0.367440589 | 0.38062956  | 0.394002218 | 0.408852797 | 0.423488664 | 0.436534513 | 0.447312873 | 0.457270791 | 0.467792798 |             |
| Tehran                     | 0.478419914 | 0.486730263 | 0.49295921  | 0.492303794 | 0.485254354 | 0.478243092 | 0.478516578 | 0.485426168 | 0.496622869 | 0.508897831 | 0.520463334 | 0.533567089 | 0.548103674 | 0.561356535 | 0.574843226 | 0.587612685 | 0.597405602 | 0.605000433 | 0.613073986 | 0.621138665 | 0.631118522 | 0.639909585 | 0.646425935 | 0.652979878 | 0.658798989 |             |
| West Azarbaijan            | 0.263187809 | 0.268945654 | 0.272306382 | 0.266971083 | 0.250658    | 0.231988957 | 0.22657884  | 0.234050809 | 0.248867683 | 0.265938    | 0.28119905  | 0.30028702  | 0.321764958 | 0.341306608 | 0.361121307 | 0.37997811  | 0.394902017 | 0.406170759 | 0.417408582 | 0.429091147 | 0.440285211 | 0.452851184 | 0.460986464 | 0.469157141 | 0.478218121 |             |
| Zand                       | 0.304000259 | 0.311862337 | 0.317343081 | 0.313207522 | 0.297441052 | 0.279516925 | 0.275579592 | 0.285524236 | 0.303930598 | 0.324089217 | 0.343815886 | 0.364186008 | 0.390783099 | 0.412190972 | 0.43495614  | 0.452275847 | 0.468809771 | 0.479870146 | 0.491579555 | 0.505262011 | 0.518514039 | 0.530740799 | 0.540959313 | 0.550735499 | 0.561282626 |             |
| Zanjan                     | 0.258860257 | 0.263496663 | 0.269317451 | 0.257192251 | 0.232171130 | 0.20383205  | 0.194118009 | 0.200675284 | 0.226817131 | 0.249798876 | 0.26945853  | 0.294041631 | 0.321108026 | 0.34619904  | 0.368955117 | 0.391319094 | 0.420977843 | 0.432096648 | 0.445648687 | 0.456107387 | 0.465858588 | 0.47426232  | 0.481968843 | 0.489479181 | 0.496776441 |             |
| Isfah                      | 0.290943585 | 0.299145577 | 0.307206393 | 0.316015085 | 0.329591423 | 0.335781385 | 0.344435451 | 0.353194598 | 0.361306377 | 0.369251553 | 0.37720537  | 0.38514542  | 0.393252968 | 0.400968304 | 0.406189665 | 0.412044173 | 0.418514116 | 0.420353594 | 0.424834933 | 0.428751731 | 0.43207554  | 0.436818479 | 0.44104027  | 0.445238849 | 0.449273641 |             |
| Jordan                     | 0.368490908 | 0.380991529 | 0.393113975 | 0.406745609 | 0.420794835 | 0.435902805 | 0.450856751 | 0.465090981 | 0.478172806 | 0.490773667 | 0.502504229 | 0.512397076 | 0.521588209 | 0.529732691 | 0.538499991 | 0.539147468 | 0.542819411 | 0.547458846 | 0.552182333 | 0.557243333 | 0.562571536 | 0.567529655 | 0.572815810 | 0.57674357  | 0.582579199 |             |
| Kuwait                     | 0.458767819 | 0.470139941 | 0.492878349 | 0.51050991  | 0.526670095 | 0.545114971 | 0.560005405 | 0.575133534 | 0.589119885 | 0.603256637 | 0.619050297 | 0.620302781 | 0.630905625 | 0.639118442 | 0.6524387   | 0.664517904 | 0.688809621 | 0.67019911  | 0.670062352 | 0.671393213 | 0.672115523 | 0.680693304 | 0.695789389 | 0.704833736 | 0.711841328 |             |
| Lebanon                    | 0.484412041 | 0.488025882 | 0.486763849 | 0.487714414 | 0.491599174 | 0.495578721 | 0.499407051 | 0.500169252 | 0.502886687 | 0.509159818 | 0.518005501 | 0.52513644  | 0.52911349  | 0.536978112 | 0.536694511 | 0.537618999 | 0.539197492 | 0.541793516 | 0.544851306 | 0.547684031 | 0.551171512 | 0.556436159 | 0.561208318 | 0.569978528 | 0.576057825 |             |
| Libya                      | 0.490914034 | 0.570031364 | 0.573566463 | 0.578389977 | 0.578389977 | 0.578389977 | 0.578389977 | 0.578389977 | 0.578389977 | 0.578389977 | 0.578389977 | 0.578389977 | 0.578389977 | 0.578389977 | 0.578389977 | 0.578389977 | 0.578389977 | 0.578389977 | 0.578389977 | 0.578389977 | 0.578389977 | 0.578389977 | 0.578389977 | 0.578389977 | 0.578389977 | 0.578389977 |
| Morocco                    | 0.2347727   | 0.24371407  | 0.252724092 | 0.261661251 | 0.27066064  | 0.279790018 | 0.288215687 | 0.296499972 | 0.305017744 | 0.312884655 | 0.321029983 | 0.329104564 | 0.336488156 | 0.344036155 | 0.35183359  | 0.35807287  | 0.364984629 | 0.371318794 | 0.377677897 | 0.382849451 | 0.388116411 | 0.394150906 | 0.399504009 | 0.405038792 | 0.410303191 |             |
| Oman                       | 0.280854555 | 0.280993991 | 0.298182206 | 0.306456564 | 0.314886316 | 0.322782020 | 0.33241893  | 0.342098072 | 0.352772069 | 0.363117844 | 0.373878109 | 0.383084749 | 0.39461055  | 0.405806975 | 0.41740551  | 0.429270949 | 0.442268122 | 0.45737972  | 0.474990333 | 0.493513107 | 0.511943599 | 0.532364904 | 0.554515537 | 0.574474902 | 0.592392487 |             |
| Palestine                  | 0.30865452  | 0.317861475 | 0.326190701 | 0.334710012 | 0.342392872 | 0.350274806 | 0.358631105 | 0.365464472 | 0.369098986 | 0.374533743 | 0.379008353 | 0.384601878 | 0.389276844 | 0.393137249 | 0.396847157 | 0.40179221  | 0.40572715  | 0.411186869 | 0.416776964 | 0.423166673 | 0.42937027  | 0.434731371 | 0.440091776 | 0.447827415 | 0.454904692 |             |
| Qatar                      | 0.541776023 | 0.5526233   | 0.5626787   | 0.571919258 | 0.58442282  | 0.588690449 | 0.596088985 | 0.603026431 | 0.609408466 | 0.615408025 | 0.621415895 | 0.62728062  | 0.633120964 | 0.63893816  | 0.645008178 | 0.651208376 | 0.655338767 | 0.660673763 | 0.666139499 | 0.672025384 | 0.678320339 | 0.684931959 | 0.691906554 | 0.700490964 | 0.708889981 |             |
| Saudi Arabia               | 0.388909595 | 0.399881524 | 0.410888311 | 0.421641317 | 0.432604023 | 0.443730453 | 0.454518331 | 0.465903657 | 0.475433073 | 0.484752133 | 0.493515412 | 0.501749351 | 0.51044771  | 0.520470469 | 0.529321124 | 0.538954515 | 0.54990771  | 0.56144266  | 0.572186913 | 0.582878871 | 0.593254233 | 0.603648419 | 0.613794116 | 0.623518214 | 0.632796447 |             |
| Sudan                      | 0.217013081 | 0.238798614 | 0.143286623 | 0.253337848 | 0.260490264 | 0.249031293 | 0.251297433 | 0.257120602 | 0.262697366 | 0.268202611 | 0.273150469 | 0.278213291 | 0.292301722 | 0.293638005 | 0.298165333 | 0.302178643 | 0.29647444  | 0.300806377 | 0.305049926 | 0.31009643  | 0.315082599 | 0.320632022 | 0.326761662 | 0.333387164 | 0.339754884 |             |
| Syria                      | 0.305427355 | 0.315107599 | 0.32394027  | 0.332914494 | 0.341622471 | 0.350668957 | 0.359872992 | 0.368737701 | 0.37734757  | 0.385221672 | 0.391718804 | 0.40060321  | 0.40801172  | 0.416137665 | 0.423425609 | 0.43049264  | 0.437907493 | 0.445904236 | 0.45414786  | 0.462437298 | 0.470692043 | 0.478478403 | 0.48623235  | 0.493770592 | 0.501748669 |             |
| Tunisia                    | 0.328258196 | 0.336294291 | 0.346213176 |             |             |             |             |             |             |             |             |             |             |             |             |             |             |             |             |             |             |             |             |             |             |             |

Table with columns for region, code, and numerical values. Includes sub-regions like Java, Sumatra, and Sulawesi.





|                             |             |             |             |             |             |             |             |             |             |             |             |             |             |             |             |             |             |             |             |             |             |             |             |             |             |
|-----------------------------|-------------|-------------|-------------|-------------|-------------|-------------|-------------|-------------|-------------|-------------|-------------|-------------|-------------|-------------|-------------|-------------|-------------|-------------|-------------|-------------|-------------|-------------|-------------|-------------|-------------|
| South Sudan                 | 0.17416594  | 0.17624742  | 0.17835598  | 0.18058485  | 0.18284586  | 0.18499318  | 0.18708658  | 0.18915177  | 0.19118679  | 0.19324881  | 0.19533917  | 0.19745978  | 0.19965511  | 0.20195071  | 0.20429939  | 0.20665665  | 0.20893276  | 0.21119401  | 0.21341647  | 0.21561209  | 0.21792046  | 0.22039943  | 0.22305711  | 0.22578869  | 0.22864585  |
| Uganda                      | 0.15666288  | 0.15955496  | 0.16326279  | 0.16581859  | 0.16854589  | 0.16893914  | 0.17027092  | 0.17197761  | 0.17411487  | 0.17579494  | 0.17727786  | 0.17870466  | 0.18052704  | 0.18256302  | 0.18473509  | 0.18700196  | 0.18924156  | 0.19100343  | 0.19355456  | 0.19729319  | 0.20183542  | 0.20708073  | 0.21309166  | 0.21971242  | 0.22691694  |
| Tanzania                    | 0.18941614  | 0.19252206  | 0.20092684  | 0.20686051  | 0.21294957  | 0.21879368  | 0.22382293  | 0.22857205  | 0.23347245  | 0.23843913  | 0.24339013  | 0.24697361  | 0.24972841  | 0.25295930  | 0.25600994  | 0.25903670  | 0.26241628  | 0.26498948  | 0.26752491  | 0.26941704  | 0.27207202  | 0.27505709  | 0.27925918  | 0.28315261  | 0.28781679  |
| Zambia                      | 0.22513247  | 0.23336468  | 0.24102149  | 0.24833034  | 0.25539912  | 0.26214672  | 0.26844563  | 0.27375417  | 0.27870703  | 0.28344940  | 0.28797497  | 0.29166283  | 0.29540072  | 0.29909021  | 0.30172683  | 0.30400859  | 0.30584236  | 0.30731627  | 0.30878020  | 0.30923449  | 0.30995813  | 0.31123669  | 0.31308733  | 0.31492645  | 0.31739643  |
| Southern sub-Saharan Africa | 0.41006414  | 0.41542854  | 0.42067014  | 0.42603905  | 0.43164313  | 0.43787868  | 0.44437649  | 0.45082332  | 0.45728926  | 0.46433794  | 0.47125202  | 0.47876299  | 0.48642713  | 0.49348609  | 0.50085023  | 0.50694663  | 0.51237786  | 0.51756947  | 0.52272250  | 0.52866317  | 0.53339781  | 0.53878042  | 0.54413429  | 0.54914165  | 0.55388469  |
| Botswana                    | 0.25375438  | 0.26290179  | 0.27201016  | 0.28130685  | 0.29100745  | 0.30123832  | 0.31165352  | 0.32240367  | 0.33497633  | 0.34932802  | 0.35644497  | 0.36385838  | 0.38013563  | 0.39283319  | 0.40575287  | 0.41807748  | 0.42975226  | 0.44049084  | 0.45052614  | 0.45995496  | 0.46926651  | 0.47858352  | 0.48776787  | 0.49619362  | 0.50497826  |
| Eswatini                    | 0.27067233  | 0.28012689  | 0.28898864  | 0.29701118  | 0.30493842  | 0.31304676  | 0.32149485  | 0.32968302  | 0.33766489  | 0.34593484  | 0.35331633  | 0.36215718  | 0.37157631  | 0.38076825  | 0.38995420  | 0.39942955  | 0.40826999  | 0.41668379  | 0.42480295  | 0.43250472  | 0.44012704  | 0.44793238  | 0.45489854  | 0.46013698  | 0.46599045  |
| Lesotho                     | 0.25418314  | 0.25892265  | 0.26496141  | 0.27331445  | 0.27960046  | 0.28526369  | 0.29086675  | 0.29630235  | 0.30124452  | 0.30628813  | 0.31126848  | 0.31619189  | 0.32101075  | 0.32663214  | 0.33278306  | 0.33915512  | 0.34549657  | 0.35169631  | 0.35787045  | 0.36351080  | 0.37126513  | 0.37721202  | 0.38309648  | 0.38840648  | 0.39349501  |
| Namibia                     | 0.35567318  | 0.36398527  | 0.37081225  | 0.37817338  | 0.38551833  | 0.39326704  | 0.40060452  | 0.40761406  | 0.414409125 | 0.42086479  | 0.42714552  | 0.43286677  | 0.43787802  | 0.44227806  | 0.446320825 | 0.45004203  | 0.45454544  | 0.46002134  | 0.46574535  | 0.47187321  | 0.47794329  | 0.483116378 | 0.48801298  | 0.492812548 | 0.497613862 |
| South Africa                | 0.447607469 | 0.45280142  | 0.45786926  | 0.46306815  | 0.46833470  | 0.474595547 | 0.480811757 | 0.48691496  | 0.492903948 | 0.499575429 | 0.506276765 | 0.513035041 | 0.520198788 | 0.527689022 | 0.535352269 | 0.541571435 | 0.546921136 | 0.552066899 | 0.557198439 | 0.562448634 | 0.567905304 | 0.573453988 | 0.579099278 | 0.584437313 | 0.589407349 |
| Eastern Cape                | 0.392262317 | 0.397753151 | 0.403222403 | 0.40888084  | 0.414822434 | 0.421251948 | 0.42797794  | 0.433743386 | 0.439848083 | 0.446684551 | 0.453511261 | 0.460116823 | 0.46703156  | 0.474378483 | 0.481422094 | 0.487156629 | 0.491945768 | 0.496558751 | 0.502227233 | 0.50589096  | 0.51093299  | 0.516048444 | 0.521361921 | 0.526467367 | 0.531269455 |
| Free State                  | 0.43813168  | 0.44359854  | 0.449223914 | 0.45519121  | 0.46160804  | 0.468611896 | 0.47587617  | 0.482526329 | 0.49074734  | 0.49900801  | 0.50721478  | 0.51583339  | 0.52383998  | 0.532653136 | 0.54083705  | 0.547472337 | 0.55288320  | 0.557829772 | 0.562617174 | 0.567353014 | 0.572049629 | 0.576714774 | 0.581126929 | 0.585306812 | 0.58910315  |
| Gauteng                     | 0.567665159 | 0.571469747 | 0.575107948 | 0.578913779 | 0.58290305  | 0.587522324 | 0.59236441  | 0.596934541 | 0.60128279  | 0.605802051 | 0.61028279  | 0.61486696  | 0.619842516 | 0.62531393  | 0.630877378 | 0.634850535 | 0.638354675 | 0.641818295 | 0.64537204  | 0.649149055 | 0.653144945 | 0.657292104 | 0.661432136 | 0.6651077   | 0.668289714 |
| KwaZulu-Natal               | 0.408976052 | 0.41508104  | 0.42084495  | 0.426636204 | 0.43265621  | 0.43925937  | 0.44611958  | 0.453281828 | 0.45947646  | 0.466085073 | 0.47308705  | 0.481537168 | 0.48944768  | 0.497972497 | 0.506410146 | 0.51397109  | 0.519883128 | 0.525872525 | 0.531685065 | 0.537429182 | 0.54332559  | 0.549274727 | 0.555189823 | 0.560854845 | 0.56617928  |
| Limpopo                     | 0.314124959 | 0.321322894 | 0.328470565 | 0.335470156 | 0.34349075  | 0.351872589 | 0.360323529 | 0.368784093 | 0.377293617 | 0.386779123 | 0.396306659 | 0.406168989 | 0.416407044 | 0.426366667 | 0.436395992 | 0.446501873 | 0.452611513 | 0.459850643 | 0.467197201 | 0.474783033 | 0.482535902 | 0.490389071 | 0.498458945 | 0.50624473  | 0.513697542 |
| Mpumalanga                  | 0.350870518 | 0.35865864  | 0.366484154 | 0.374436603 | 0.382850932 | 0.39171601  | 0.400731252 | 0.40991628  | 0.418323356 | 0.427486484 | 0.437314688 | 0.447223304 | 0.457464849 | 0.46862370  | 0.479294211 | 0.48855668  | 0.497037138 | 0.505426137 | 0.513684302 | 0.521975611 | 0.531072613 | 0.537754564 | 0.544821961 | 0.551184002 | 0.556986712 |
| North West                  | 0.413384999 | 0.42023127  | 0.426914195 | 0.433174193 | 0.439430614 | 0.44599619  | 0.45286217  | 0.45992553  | 0.467212273 | 0.482052822 | 0.492567645 | 0.498458412 | 0.504112883 | 0.51010346  | 0.51622896  | 0.52031252  | 0.528126699 | 0.532204689 | 0.539984307 | 0.543479865 | 0.547881717 | 0.552713272 | 0.558067867 | 0.563489877 | 0.568101976 |
| Northern Cape               | 0.413384999 | 0.42023127  | 0.426914195 | 0.433174193 | 0.439430614 | 0.44599619  | 0.45286217  | 0.45992553  | 0.467212273 | 0.482052822 | 0.492567645 | 0.498458412 | 0.504112883 | 0.51010346  | 0.51622896  | 0.52031252  | 0.528126699 | 0.532204689 | 0.539984307 | 0.543479865 | 0.547881717 | 0.552713272 | 0.558067867 | 0.563489877 | 0.568101976 |
| Western Cape                | 0.56138495  | 0.566553229 | 0.569796632 | 0.574818153 | 0.578954751 | 0.584087463 | 0.589388572 | 0.594814233 | 0.59886572  | 0.603756888 | 0.608422096 | 0.612888711 | 0.617548244 | 0.622537103 | 0.627208488 | 0.630621788 | 0.633124877 | 0.635137853 | 0.638692409 | 0.638716432 | 0.640890098 | 0.643546189 | 0.646366031 | 0.649109134 | 0.651688918 |
| Zimbabwe                    | 0.278660092 | 0.28496278  | 0.290473906 | 0.295495558 | 0.301229991 | 0.30758674  | 0.31349716  | 0.32069234  | 0.33184161  | 0.342525996 | 0.353067217 | 0.363804263 | 0.373547449 | 0.38270234  | 0.39108167  | 0.398595341 | 0.406052877 | 0.412083826 | 0.4179742   | 0.424051564 | 0.42992904  | 0.434187192 | 0.438141988 | 0.441093153 | 0.443246604 |
| Western sub-Saharan Africa  | 0.210238435 | 0.214964816 | 0.220045325 | 0.225011911 | 0.229920409 | 0.234605172 | 0.239142907 | 0.243652901 | 0.247983094 | 0.25214642  | 0.256639907 | 0.260019835 | 0.263174796 | 0.266492683 | 0.270006039 | 0.273730004 | 0.277410732 | 0.281024681 | 0.284431723 | 0.287699583 | 0.2909832   | 0.294618466 | 0.298320443 | 0.302025797 | 0.305809779 |
| Benin                       | 0.164057652 | 0.167511029 | 0.171022328 | 0.174298691 | 0.177894107 | 0.182073262 | 0.18613489  | 0.189893259 | 0.193506598 | 0.197043515 | 0.201241584 | 0.205009596 | 0.208478229 | 0.21198209  | 0.21520582  | 0.218907154 | 0.222599019 | 0.226232465 | 0.230312594 | 0.234052076 | 0.238099696 | 0.241895323 | 0.245731534 | 0.249576451 | 0.253215341 |
| Burkina Faso                | 0.08791264  | 0.089244883 | 0.091220197 | 0.093615271 | 0.096248548 | 0.098939757 | 0.101922491 | 0.1047398   | 0.107267216 | 0.109781399 | 0.112311962 | 0.116362838 | 0.119648728 | 0.123151322 | 0.12649486  | 0.129695615 | 0.133299128 | 0.136954798 | 0.139825465 | 0.142848973 | 0.146115673 | 0.150041686 | 0.154228401 | 0.158707048 | 0.163468067 |
| Cabo Verde                  | 0.208107033 | 0.210519141 | 0.21259042  | 0.215359145 | 0.218148297 | 0.221190507 | 0.22441268  | 0.22752598  | 0.231413695 | 0.235099377 | 0.241388352 | 0.247513927 | 0.254448606 | 0.261898837 | 0.269643143 | 0.276723367 | 0.282931722 | 0.288460371 | 0.294517286 | 0.302216794 | 0.310675634 | 0.319736229 | 0.329049585 | 0.338786069 | 0.349296918 |
| Cameroon                    | 0.203793474 | 0.207467403 | 0.211927787 | 0.21704717  | 0.222499129 | 0.228182409 | 0.234558379 | 0.241338116 | 0.248550257 | 0.25623289  | 0.26442889  | 0.272644284 | 0.280776182 | 0.288503108 | 0.295986728 | 0.303055334 | 0.309623458 | 0.315601269 | 0.320813614 | 0.325410123 | 0.329539318 | 0.333425982 | 0.337346001 | 0.34119709  | 0.344955564 |
| Chad                        | 0.087196718 | 0.088826606 | 0.090297844 | 0.091743729 | 0.092512392 | 0.093231451 | 0.093570212 | 0.094182397 | 0.095272338 | 0.097566097 | 0.099944643 | 0.102492739 | 0.105188296 | 0.108321744 | 0.11144706  | 0.114638829 | 0.117954634 | 0.121132832 | 0.124600072 | 0.126805752 | 0.128289492 | 0.130146848 | 0.132136021 | 0.134090304 | 0.135825261 |
| Côte d'Ivoire               | 0.19498518  | 0.20011668  | 0.205511067 | 0.211015954 | 0.216170001 | 0.220709798 | 0.225640239 | 0.230850398 | 0.23554303  | 0.240561345 | 0.245928769 | 0.251723777 | 0.257841066 | 0.264707492 | 0.272091406 | 0.279320533 | 0.286492681 | 0.293451293 | 0.299743215 | 0.305210653 | 0.310105508 | 0.314963588 | 0.319843979 | 0.324712873 | 0.329201009 |
| The Gambia                  | 0.156508915 | 0.159478849 | 0.162966681 | 0.167174471 | 0.171685579 | 0.176349554 | 0.181480154 | 0.187276057 | 0.193338953 | 0.199514073 | 0.205952582 | 0.212594339 | 0.219257207 | 0.225801621 | 0.232591104 | 0.238714846 | 0.245010164 | 0.251087863 | 0.256996141 | 0.262424792 | 0.267696507 | 0.27291951  | 0.278274122 | 0.283946066 | 0.290070621 |
| Ghana                       | 0.293782369 | 0.29814996  | 0.303505936 | 0.309240556 | 0.314862471 | 0.320540172 | 0.326042847 | 0.330983697 | 0.335422922 | 0.340080442 | 0.345138376 | 0.350321836 | 0.355633384 | 0.361390606 | 0.367212438 | 0.373112005 | 0.379239256 | 0.384856767 | 0.389968494 | 0.394953663 | 0.399930204 | 0.405003047 | 0.410083073 | 0.414888532 | 0.419755496 |
| Guinea                      | 0.135044771 | 0.139990419 | 0.144608549 | 0.147319789 | 0.150239704 | 0.153039529 | 0.155521643 | 0.157862847 | 0.160001278 | 0.162905916 | 0.164245337 | 0.166563994 | 0.169155216 | 0.171917453 | 0.175059715 | 0.178295429 | 0.181495391 | 0.184848016 | 0.187686242 | 0.191128837 | 0.194573245 | 0.198633758 | 0.20280449  | 0.208003383 | 0.212412705 |
| Guinea-Bissau               | 0.166415868 | 0.169131934 | 0.170882408 | 0.173219277 | 0.175590916 | 0.17767328  | 0.17887789  | 0.179607797 | 0.182806508 | 0.185380478 | 0.188091234 | 0.19165051  | 0.194968741 | 0.198634825 | 0.202947615 | 0.207614839 | 0.212505984 | 0.2170260   |             |             |             |             |             |             |             |

Appendix Table S17: Socio-demographic Index values for all estimated GBD 2021 locations, 2000-2021

| Location                                         | 2000       | 2001       | 2002       | 2003       | 2004       | 2005       | 2006       | 2007       | 2008       | 2009       | 2010       | 2011       | 2012       | 2013       | 2014       | 2015       | 2016        | 2017       | 2018       | 2019       | 2020       | 2021       |
|--------------------------------------------------|------------|------------|------------|------------|------------|------------|------------|------------|------------|------------|------------|------------|------------|------------|------------|------------|-------------|------------|------------|------------|------------|------------|
| Global                                           | 0.56800316 | 0.57177537 | 0.57568796 | 0.57990708 | 0.58437859 | 0.58897852 | 0.59375662 | 0.59864137 | 0.60370701 | 0.60775944 | 0.6129525  | 0.61775922 | 0.62184498 | 0.62634328 | 0.63098237 | 0.63564149 | 0.64015359  | 0.64556643 | 0.65104847 | 0.6565759  | 0.66134354 | 0.66620297 |
| Central Europe, eastern Europe, and central Asia | 0.68204328 | 0.68616546 | 0.69041062 | 0.69484808 | 0.70141441 | 0.70770719 | 0.71222406 | 0.71722196 | 0.72255514 | 0.72727958 | 0.73207766 | 0.73697829 | 0.74197451 | 0.74707837 | 0.75218237 | 0.75728637 | 0.76239037  | 0.76749437 | 0.77259837 | 0.77770237 | 0.78280637 | 0.78791037 |
| Central Asia                                     | 0.58215554 | 0.58664578 | 0.59145711 | 0.59625977 | 0.60137672 | 0.60729382 | 0.61307828 | 0.61910458 | 0.62493038 | 0.63102089 | 0.632956   | 0.64031356 | 0.64467352 | 0.64888814 | 0.65299988 | 0.65681783 | 0.66031242  | 0.66357678 | 0.66666645 | 0.66983773 | 0.67248671 | 0.67516398 |
| Armenia                                          | 0.57943757 | 0.58541193 | 0.59271061 | 0.60080917 | 0.60903177 | 0.61775963 | 0.62668834 | 0.63587098 | 0.64445159 | 0.64971484 | 0.65481153 | 0.65981809 | 0.66483314 | 0.66953545 | 0.67393219 | 0.67805463 | 0.6817464   | 0.68598027 | 0.69027687 | 0.69476596 | 0.6982689  | 0.70183319 |
| Azerbaijan                                       | 0.58002057 | 0.58219371 | 0.58571614 | 0.59003871 | 0.59464608 | 0.60248519 | 0.6137711  | 0.62611093 | 0.63690111 | 0.64516334 | 0.65205651 | 0.65797163 | 0.662897   | 0.66765878 | 0.67216274 | 0.67624491 | 0.679980764 | 0.6832632  | 0.68656109 | 0.68983471 | 0.69260519 | 0.69485127 |
| Georgia                                          | 0.63026599 | 0.6333883  | 0.63837011 | 0.64406558 | 0.64892098 | 0.653616   | 0.65840337 | 0.66369797 | 0.6684245  | 0.67244938 | 0.67703489 | 0.68156704 | 0.68551922 | 0.68860327 | 0.69215521 | 0.69731613 | 0.70337149  | 0.71087472 | 0.71799365 | 0.72453646 | 0.72912589 | 0.7324736  |
| Kazakhstan                                       | 0.64468962 | 0.64839726 | 0.65152934 | 0.65483593 | 0.65873307 | 0.66294394 | 0.66740486 | 0.67136721 | 0.67532527 | 0.68160684 | 0.68699664 | 0.69175895 | 0.69531277 | 0.69905539 | 0.70351192 | 0.70822974 | 0.71256904  | 0.71620669 | 0.718532   | 0.7207976  | 0.72278877 | 0.7251445  |
| Kyrgyzstan                                       | 0.54303649 | 0.54380555 | 0.54437467 | 0.54564926 | 0.54726234 | 0.54826045 | 0.54938359 | 0.55114619 | 0.55320638 | 0.55512387 | 0.55641654 | 0.55892333 | 0.56154157 | 0.56577677 | 0.57056936 | 0.57546323 | 0.58038855  | 0.5857661  | 0.59123713 | 0.59650164 | 0.60049955 | 0.60397933 |
| Mongolia                                         | 0.52665034 | 0.5326202  | 0.53842483 | 0.54397165 | 0.5495515  | 0.55468028 | 0.55956114 | 0.5642368  | 0.56880006 | 0.57134169 | 0.57440667 | 0.57860066 | 0.58322589 | 0.58808081 | 0.59286765 | 0.59865965 | 0.60026077  | 0.60372196 | 0.60750183 | 0.61125068 | 0.61462964 | 0.61762156 |
| Tajikistan                                       | 0.45706133 | 0.4562561  | 0.45880778 | 0.46329013 | 0.46915421 | 0.47463779 | 0.47965183 | 0.48421116 | 0.48844114 | 0.49206404 | 0.49589396 | 0.4998698  | 0.50395388 | 0.50797068 | 0.51198952 | 0.51578324 | 0.519897    | 0.52449261 | 0.52915392 | 0.53376995 | 0.53769053 | 0.54151119 |
| Turkmenistan                                     | 0.56742103 | 0.57104382 | 0.57559617 | 0.58082013 | 0.58671235 | 0.59333889 | 0.59989607 | 0.60604227 | 0.61192331 | 0.61765291 | 0.62323459 | 0.62923372 | 0.63526318 | 0.64161889 | 0.64754242 | 0.65335279 | 0.65894561  | 0.66428469 | 0.6694336  | 0.67403354 | 0.67829818 | 0.68216078 |
| Uzbekistan                                       | 0.55725231 | 0.56480338 | 0.57169014 | 0.57800654 | 0.58394299 | 0.58953078 | 0.59449806 | 0.59962805 | 0.60488916 | 0.61035175 | 0.61609791 | 0.62134462 | 0.62620213 | 0.6307964  | 0.63525705 | 0.63980564 | 0.6442306   | 0.64811935 | 0.65191814 | 0.65583696 | 0.6591242  | 0.66262169 |
| Central Europe                                   | 0.69879791 | 0.70565678 | 0.7120006  | 0.71782364 | 0.72349425 | 0.72867409 | 0.73347644 | 0.73807667 | 0.74314784 | 0.74876572 | 0.75491949 | 0.76034929 | 0.76480327 | 0.7685617  | 0.7715547  | 0.77484401 | 0.7781725   | 0.78135932 | 0.78454763 | 0.78794898 | 0.79113112 | 0.79246455 |
| Albania                                          | 0.58466419 | 0.59241295 | 0.5998598  | 0.60697117 | 0.61386425 | 0.62067961 | 0.62748562 | 0.63416797 | 0.64076613 | 0.64681613 | 0.652642   | 0.65819677 | 0.66355678 | 0.66873956 | 0.67411299 | 0.6796686  | 0.68503665  | 0.6903792  | 0.6956688  | 0.70028786 | 0.70379025 | 0.70684979 |
| Bosnia and Herzegovina                           | 0.61095068 | 0.62198946 | 0.63207552 | 0.6406351  | 0.64779373 | 0.65385914 | 0.65981366 | 0.66557874 | 0.67110081 | 0.67660239 | 0.6808242  | 0.68539926 | 0.68950657 | 0.69350871 | 0.69703189 | 0.70044605 | 0.70407934  | 0.70805343 | 0.7123473  | 0.71685712 | 0.72020206 | 0.72307789 |
| Bulgaria                                         | 0.68100452 | 0.68648377 | 0.69151167 | 0.69565696 | 0.6998195  | 0.70447121 | 0.70886829 | 0.7131924  | 0.71767245 | 0.72367663 | 0.73070174 | 0.73574928 | 0.73917752 | 0.74213595 | 0.74532764 | 0.74897906 | 0.752292    | 0.75566586 | 0.75914846 | 0.76235979 | 0.76508971 | 0.76815094 |
| Croatia                                          | 0.7030399  | 0.70953684 | 0.71538342 | 0.72113038 | 0.72632765 | 0.73215414 | 0.73806688 | 0.74314878 | 0.7484966  | 0.75406561 | 0.75947225 | 0.76368638 | 0.76740534 | 0.77115188 | 0.77447924 | 0.77856859 | 0.78144361  | 0.78507454 | 0.78867141 | 0.79247542 | 0.79546227 | 0.79834103 |
| Czechia                                          | 0.76776616 | 0.77127624 | 0.77692793 | 0.78244808 | 0.7871264  | 0.79133395 | 0.79492278 | 0.79825412 | 0.80176485 | 0.80496222 | 0.80874733 | 0.81205478 | 0.8142304  | 0.81651536 | 0.81822726 | 0.81956646 | 0.8215303   | 0.82306768 | 0.82403449 | 0.82478447 | 0.8262663  | 0.82845043 |
| Hungary                                          | 0.71580528 | 0.72290906 | 0.7283846  | 0.73450666 | 0.74009977 | 0.74535681 | 0.75051538 | 0.75494294 | 0.75931747 | 0.76353669 | 0.76732665 | 0.76970194 | 0.77078425 | 0.7715617  | 0.77257505 | 0.77404738 | 0.77615031  | 0.77911642 | 0.78208366 | 0.78491031 | 0.78762039 | 0.79075477 |
| Montenegro                                       | 0.67730685 | 0.68343345 | 0.68993948 | 0.69651751 | 0.70299828 | 0.70906546 | 0.71545907 | 0.72250394 | 0.7298176  | 0.73653893 | 0.74343787 | 0.75008033 | 0.75557838 | 0.76088691 | 0.76577653 | 0.77056128 | 0.77520077  | 0.77976463 | 0.78440897 | 0.7890269  | 0.79255439 | 0.79580058 |
| North Macedonia                                  | 0.64165124 | 0.64804968 | 0.65539879 | 0.66340889 | 0.67123752 | 0.67804727 | 0.68404434 | 0.68927948 | 0.69337696 | 0.70045305 | 0.7058932  | 0.71059252 | 0.71517315 | 0.71967115 | 0.72408959 | 0.72860377 | 0.73317362  | 0.73733996 | 0.74133437 | 0.74519357 | 0.7487499  | 0.7506297  |
| Poland                                           | 0.70662905 | 0.7148313  | 0.72200946 | 0.72815525 | 0.73367319 | 0.73842877 | 0.74236371 | 0.74600882 | 0.75025143 | 0.75462738 | 0.76318497 | 0.76940712 | 0.77468077 | 0.77943426 | 0.78386287 | 0.78744534 | 0.79065101  | 0.79453034 | 0.79947898 | 0.80479133 | 0.80879532 | 0.81204281 |
| Romania                                          | 0.66529435 | 0.67202107 | 0.67829742 | 0.6840793  | 0.69041705 | 0.69499895 | 0.69949077 | 0.70452373 | 0.71075133 | 0.71744512 | 0.72389157 | 0.72901827 | 0.73389248 | 0.73880477 | 0.74304957 | 0.74743753 | 0.74705871  | 0.75111638 | 0.75553333 | 0.76028397 | 0.76427644 | 0.76845386 |
| Serbia                                           | 0.6607528  | 0.66549073 | 0.67151107 | 0.67833493 | 0.68681984 | 0.69609757 | 0.70494502 | 0.7132423  | 0.72150531 | 0.72929656 | 0.74009131 | 0.75070276 | 0.75710508 | 0.76217091 | 0.76604309 | 0.76984222 | 0.77365408  | 0.77746038 | 0.78149497 | 0.7857683  | 0.78918333 | 0.79241629 |
| Slovakia                                         | 0.73404624 | 0.74139255 | 0.74679114 | 0.75116727 | 0.75583699 | 0.76172419 | 0.76767304 | 0.77291415 | 0.77779174 | 0.78105226 | 0.78625442 | 0.79146538 | 0.79545622 | 0.7990372  | 0.80009418 | 0.80087821 | 0.80227732  | 0.8043573  | 0.80644846 | 0.80830597 | 0.81061053 |            |
| Slovenia                                         | 0.7957801  | 0.78624078 | 0.79180557 | 0.79637153 | 0.80096224 | 0.80560125 | 0.8097086  | 0.81300632 | 0.81634725 | 0.81887856 | 0.82117849 | 0.82302356 | 0.82433656 | 0.82582628 | 0.82779925 | 0.82983707 | 0.83136792  | 0.83303814 | 0.8347248  | 0.83626678 | 0.84037385 | 0.84243073 |
| Eastern Europe                                   | 0.70101118 | 0.70350622 | 0.70672714 | 0.71202517 | 0.71921544 | 0.72626571 | 0.73261745 | 0.73878686 | 0.74545402 | 0.75107016 | 0.75660648 | 0.7610253  | 0.76542275 | 0.77033829 | 0.77590917 | 0.77966348 | 0.78480469  | 0.79001487 | 0.79448558 | 0.79813838 | 0.80050506 | 0.80285101 |
| Belarus                                          | 0.66470582 | 0.67133327 | 0.67812178 | 0.68486856 | 0.69250214 | 0.69989548 | 0.7051191  | 0.71149656 | 0.71912807 | 0.72729278 | 0.73495463 | 0.73950433 | 0.74346884 | 0.74852932 | 0.75351148 | 0.76205754 | 0.76432822  | 0.77113147 | 0.77656896 | 0.78050802 | 0.78238156 | 0.78448471 |
| Estonia                                          | 0.73971315 | 0.74660221 | 0.7526299  | 0.75781568 | 0.76322373 | 0.76911218 | 0.7745184  | 0.78010444 | 0.78589887 | 0.79472821 | 0.80082972 | 0.80663308 | 0.81110936 | 0.81488718 | 0.81877073 | 0.82322128 | 0.82736436  | 0.83097531 | 0.8345663  | 0.83857531 | 0.84181714 | 0.84491779 |
| Latvia                                           | 0.73095145 | 0.73629422 | 0.74187044 | 0.74816816 | 0.75526321 | 0.76192943 | 0.76845993 | 0.77481906 | 0.78324573 | 0.79450443 | 0.79817159 | 0.79900878 | 0.80102647 | 0.80266049 | 0.80372149 | 0.80699589 | 0.81146359  | 0.81692312 | 0.82141981 | 0.82478178 | 0.82790045 | 0.83066352 |
| Lithuania                                        | 0.71989696 | 0.72713358 | 0.73373934 | 0.7412296  | 0.74894976 | 0.75635236 | 0.76350592 | 0.77022964 | 0.77827331 | 0.78568974 | 0.79336468 | 0.80092499 | 0.80878203 | 0.81321972 | 0.81788638 | 0.82311263 | 0.8293037   | 0.83587174 | 0.84191891 | 0.84790634 | 0.85275239 | 0.85684805 |
| Moldova                                          | 0.62200493 | 0.62293641 | 0.62587484 | 0.62998504 | 0.63539482 | 0.64153097 | 0.64799626 | 0.65421585 | 0.6610466  | 0.66628439 | 0.67198962 | 0.67800414 | 0.6829798  | 0.68851917 | 0.69410456 | 0.69935517 | 0.70514454  | 0.71120664 | 0.71724443 | 0.72301165 | 0.72771054 | 0.73221488 |
| Russia                                           | 0.70864365 | 0.71057036 | 0.71346096 | 0.71885172 | 0.72630532 | 0.73359278 | 0.74006466 | 0.74619151 | 0.75262324 | 0.759604   | 0.7633201  | 0.76763359 | 0.77192038 | 0.77652698 | 0.78061752 | 0.78497137 | 0.79033015  | 0.79566948 | 0.80010814 | 0.80368582 | 0.80661104 | 0.80856    |
| Ukraine                                          |            |            |            |            |            |            |            |            |            |            |            |            |            |            |            |            |             |            |            |            |            |            |

|                           |            |            |             |            |            |            |            |            |            |            |            |            |            |            |            |            |            |            |            |            |            |              |
|---------------------------|------------|------------|-------------|------------|------------|------------|------------|------------|------------|------------|------------|------------|------------|------------|------------|------------|------------|------------|------------|------------|------------|--------------|
| Ktchi                     | 0.78045311 | 0.78341967 | 0.786654    | 0.78961915 | 0.79221878 | 0.79404854 | 0.79541345 | 0.79680627 | 0.79841258 | 0.80023214 | 0.80257547 | 0.80524945 | 0.80774471 | 0.81030636 | 0.81302166 | 0.81591507 | 0.81925189 | 0.82272476 | 0.82632776 | 0.82989924 | 0.832364   | 0.83490616   |
| Kumamoto                  | 0.78293029 | 0.78506212 | 0.78678074  | 0.79091605 | 0.79398795 | 0.79632154 | 0.79754144 | 0.79891207 | 0.80041557 | 0.80189814 | 0.80396303 | 0.80650876 | 0.80927457 | 0.81208558 | 0.81493941 | 0.8176735  | 0.82066118 | 0.82364727 | 0.82677894 | 0.8300365  | 0.8322153  | 0.83453659   |
| Kyoto                     | 0.83257268 | 0.83446481 | 0.83660877  | 0.83902629 | 0.84165274 | 0.84395744 | 0.84570039 | 0.84752644 | 0.84982566 | 0.85265396 | 0.85522744 | 0.85811512 | 0.86134517 | 0.86492821 | 0.86859632 | 0.87236215 | 0.87622626 | 0.88019786 | 0.88427416 | 0.88845616 | 0.89274228 | 0.8971601835 |
| Mie                       | 0.80211902 | 0.80484867 | 0.80764589  | 0.81079547 | 0.8142186  | 0.81711858 | 0.81946188 | 0.82195609 | 0.82390435 | 0.82599892 | 0.82861707 | 0.83114417 | 0.8337827  | 0.83666254 | 0.83962612 | 0.8427325  | 0.84601697 | 0.84924362 | 0.85253608 | 0.85582009 | 0.85912473 | 0.86251619   |
| Miyagi                    | 0.80523442 | 0.80695671 | 0.80927991  | 0.81199468 | 0.81489873 | 0.81738953 | 0.81927682 | 0.82094772 | 0.82257561 | 0.82420999 | 0.8261855  | 0.8284245  | 0.83139288 | 0.83452577 | 0.83789656 | 0.84134574 | 0.84497435 | 0.84884135 | 0.85291969 | 0.85735363 | 0.86197514 | 0.86688657   |
| Miyazaki                  | 0.77361448 | 0.77604665 | 0.77900825  | 0.78222887 | 0.78535599 | 0.7874564  | 0.78823714 | 0.78939737 | 0.790878   | 0.79254962 | 0.79461097 | 0.7972054  | 0.79990634 | 0.80274632 | 0.805668   | 0.80854478 | 0.81162327 | 0.81466352 | 0.81794356 | 0.82146135 | 0.82537932 | 0.82965896   |
| Nagano                    | 0.81026469 | 0.81234308 | 0.81448684  | 0.8167925  | 0.81933682 | 0.8216002  | 0.82351302 | 0.82558167 | 0.82757006 | 0.82924148 | 0.83131053 | 0.83351826 | 0.83593514 | 0.83724094 | 0.83932896 | 0.84186603 | 0.84471469 | 0.84768055 | 0.85078159 | 0.85396811 | 0.85691946 | 0.85957784   |
| Nagasaki                  | 0.77718146 | 0.7792525  | 0.78166337  | 0.78414904 | 0.7868197  | 0.78960926 | 0.79252376 | 0.79474035 | 0.7928705  | 0.79446748 | 0.79686878 | 0.79978117 | 0.80265729 | 0.80533637 | 0.807847   | 0.81074883 | 0.81396269 | 0.81740776 | 0.82095667 | 0.82439151 | 0.82674305 | 0.82921388   |
| Nara                      | 0.81465722 | 0.81672094 | 0.81892478  | 0.82114727 | 0.8233192  | 0.82502828 | 0.82607449 | 0.82719269 | 0.82864169 | 0.82958941 | 0.83127913 | 0.83279357 | 0.83436246 | 0.83615687 | 0.83794932 | 0.83973697 | 0.84173331 | 0.84378632 | 0.84606016 | 0.84844766 | 0.8499352  | 0.8516522    |
| Niigata                   | 0.79270107 | 0.79536472 | 0.79837768  | 0.80136145 | 0.80442238 | 0.80697612 | 0.80856016 | 0.81027861 | 0.81194731 | 0.81366644 | 0.81595803 | 0.81846309 | 0.82109167 | 0.82387172 | 0.82660024 | 0.82918937 | 0.83193627 | 0.83476685 | 0.83769159 | 0.84074048 | 0.84285295 | 0.8451251    |
| Oita                      | 0.80007512 | 0.80245649 | 0.80536363  | 0.80858375 | 0.81173714 | 0.81398363 | 0.81528513 | 0.81650498 | 0.81780236 | 0.81933576 | 0.82088887 | 0.8233097  | 0.826154   | 0.82769824 | 0.82994155 | 0.83233947 | 0.8352293  | 0.8382653  | 0.8414539  | 0.84471141 | 0.84693883 | 0.84928244   |
| Okayama                   | 0.81068495 | 0.81281515 | 0.81547384  | 0.8181863  | 0.82098671 | 0.82343597 | 0.82573387 | 0.82809923 | 0.83024627 | 0.8322331  | 0.83446952 | 0.83699498 | 0.83923484 | 0.84150667 | 0.84377162 | 0.84627974 | 0.84896787 | 0.85182062 | 0.85489701 | 0.85807399 | 0.86027156 | 0.86256022   |
| Okinawa                   | 0.76401725 | 0.76644775 | 0.77006847  | 0.77378759 | 0.77766314 | 0.78078458 | 0.78279709 | 0.78447154 | 0.78614427 | 0.78818894 | 0.79052329 | 0.79259381 | 0.79422211 | 0.79684744 | 0.79950474 | 0.80230924 | 0.80553625 | 0.80906299 | 0.81286285 | 0.8169732  | 0.821232   | 0.82581305   |
| Osaka                     | 0.8374334  | 0.83874731 | 0.8403772   | 0.84214541 | 0.84411331 | 0.84567855 | 0.84682826 | 0.84810578 | 0.8494596  | 0.85077574 | 0.85258357 | 0.8546753  | 0.85666015 | 0.85852076 | 0.86051359 | 0.86260459 | 0.8649027  | 0.8673411  | 0.86993601 | 0.872664   | 0.87434318 | 0.87640295   |
| Saga                      | 0.78232171 | 0.78749215 | 0.79047822  | 0.79362005 | 0.79678813 | 0.79925514 | 0.80052925 | 0.80216197 | 0.80391131 | 0.80541167 | 0.80748932 | 0.80954996 | 0.81138677 | 0.81317625 | 0.81523303 | 0.81760275 | 0.82035528 | 0.82363197 | 0.82668387 | 0.8311189  | 0.8354558  | 0.83937567   |
| Saitama                   | 0.814842   | 0.81604769 | 0.81767303  | 0.81975178 | 0.82218282 | 0.82436765 | 0.82620183 | 0.82767181 | 0.82943717 | 0.83108422 | 0.83309052 | 0.8352491  | 0.83719716 | 0.83924866 | 0.84128281 | 0.84333055 | 0.84560362 | 0.8479581  | 0.85046102 | 0.85300708 | 0.85594543 | 0.85673105   |
| Shiga                     | 0.82986369 | 0.83156427 | 0.83427903  | 0.83720508 | 0.84008854 | 0.84221347 | 0.84351544 | 0.84523639 | 0.84689308 | 0.84839055 | 0.85033482 | 0.85220357 | 0.85417981 | 0.85621791 | 0.85827185 | 0.86042947 | 0.86271728 | 0.86536673 | 0.86808768 | 0.87074143 | 0.87242284 | 0.87432337   |
| Shimane                   | 0.7796426  | 0.78223271 | 0.78556393  | 0.78911113 | 0.79279072 | 0.79552484 | 0.79748084 | 0.7996164  | 0.80143878 | 0.80306571 | 0.80532182 | 0.80832427 | 0.8114897  | 0.81450981 | 0.81719972 | 0.81995576 | 0.82325668 | 0.82653441 | 0.83002969 | 0.8336211  | 0.83608512 | 0.83867226   |
| Shizuoka                  | 0.81292247 | 0.81477053 | 0.81741221  | 0.82035273 | 0.82338208 | 0.82598914 | 0.82816662 | 0.83038886 | 0.83253433 | 0.83441062 | 0.83666222 | 0.83912754 | 0.8415696  | 0.84412845 | 0.84662065 | 0.84925416 | 0.85215925 | 0.85512197 | 0.85814927 | 0.86120135 | 0.86325076 | 0.86545045   |
| Tochigi                   | 0.80540865 | 0.80715178 | 0.809636    | 0.81245611 | 0.81556709 | 0.81824367 | 0.82039122 | 0.82263    | 0.82476673 | 0.82701468 | 0.82970196 | 0.83231255 | 0.8347045  | 0.83713149 | 0.83990111 | 0.84308497 | 0.84643456 | 0.84970327 | 0.85313389 | 0.85652734 | 0.85979538 | 0.8611865    |
| Tokushima                 | 0.79397171 | 0.79722871 | 0.80114346  | 0.80546339 | 0.80963532 | 0.81277519 | 0.81507553 | 0.81712433 | 0.81927235 | 0.82144075 | 0.82432053 | 0.82720682 | 0.82999467 | 0.83257336 | 0.83565784 | 0.83862497 | 0.84195162 | 0.84547443 | 0.84917384 | 0.85272355 | 0.85606056 | 0.85748626   |
| Tokyo                     | 0.8960117  | 0.8976953  | 0.89948479  | 0.90125465 | 0.90300785 | 0.90451959 | 0.90585958 | 0.90724926 | 0.90875915 | 0.91061338 | 0.912389   | 0.91424523 | 0.91590124 | 0.91740228 | 0.91888298 | 0.92027589 | 0.92171952 | 0.92310058 | 0.92457188 | 0.92606561 | 0.9274607  | 0.92881011   |
| Tottori                   | 0.7927611  | 0.79476359 | 0.7970453   | 0.79943445 | 0.8020004  | 0.80388624 | 0.80530368 | 0.80667932 | 0.80797056 | 0.80919693 | 0.810385   | 0.81188448 | 0.81345937 | 0.81516252 | 0.81712678 | 0.81933739 | 0.82183984 | 0.82465627 | 0.82792754 | 0.83130918 | 0.8357647  | 0.83959696   |
| Toyama                    | 0.8145953  | 0.81715206 | 0.81999204  | 0.82317001 | 0.82639689 | 0.82912046 | 0.83097413 | 0.8328277  | 0.83471494 | 0.83622532 | 0.83836985 | 0.84062285 | 0.84267205 | 0.84483545 | 0.84712486 | 0.84954174 | 0.85221074 | 0.85493825 | 0.85785099 | 0.86084607 | 0.86288001 | 0.86511813   |
| Wakayama                  | 0.78860626 | 0.79118409 | 0.79406118  | 0.79710686 | 0.80036864 | 0.80396087 | 0.80820247 | 0.81408414 | 0.82155037 | 0.83153727 | 0.84186858 | 0.82200534 | 0.82512279 | 0.82811175 | 0.83091736 | 0.8338982  | 0.8367322  | 0.83965402 | 0.84273187 | 0.84476128 | 0.84703748 |              |
| Yamagata                  | 0.77863534 | 0.78093114 | 0.78336657  | 0.78646429 | 0.78985381 | 0.79282314 | 0.7953713  | 0.79815611 | 0.80046852 | 0.802631   | 0.80530324 | 0.80805942 | 0.8107854  | 0.81366333 | 0.81652403 | 0.81960797 | 0.82298558 | 0.82634022 | 0.8297599  | 0.83316026 | 0.83545631 | 0.83793315   |
| Yamaguchi                 | 0.8031616  | 0.80553595 | 0.808028079 | 0.81121021 | 0.81455238 | 0.81655968 | 0.81818226 | 0.82006813 | 0.82206883 | 0.824211   | 0.82638188 | 0.82979826 | 0.83254721 | 0.83524197 | 0.83777225 | 0.83989523 | 0.8424799  | 0.84538757 | 0.8489159  | 0.85179793 | 0.85396251 | 0.85625889   |
| Yamanashi                 | 0.80863842 | 0.8102244  | 0.81257207  | 0.81505088 | 0.81792044 | 0.82047173 | 0.82319808 | 0.82601919 | 0.8285141  | 0.83019439 | 0.83272313 | 0.83546504 | 0.83777821 | 0.83984945 | 0.84196589 | 0.84419901 | 0.84649973 | 0.84875021 | 0.85117713 | 0.85388208 | 0.85570176 | 0.85778285   |
| South Korea               | 0.78542882 | 0.79349628 | 0.8010243   | 0.80768779 | 0.81372093 | 0.81909394 | 0.82417982 | 0.82912795 | 0.83389463 | 0.83810833 | 0.84251143 | 0.84691323 | 0.85114026 | 0.855441   | 0.85966557 | 0.86390741 | 0.86831782 | 0.87261776 | 0.87682332 | 0.88073151 | 0.88371757 | 0.88667527   |
| Singapore                 | 0.7671737  | 0.77429466 | 0.77973577  | 0.78416556 | 0.78985277 | 0.79645575 | 0.80334269 | 0.8106253  | 0.81812416 | 0.82425152 | 0.83022216 | 0.8382961  | 0.83739181 | 0.84042018 | 0.84289454 | 0.84540186 | 0.847597   | 0.84905152 | 0.85076273 | 0.85249734 | 0.85429601 | 0.85609777   |
| High-income North America | 0.79499703 | 0.79927482 | 0.80296133  | 0.80582125 | 0.80799119 | 0.80888669 | 0.80972116 | 0.81248611 | 0.81708393 | 0.82247001 | 0.82781414 | 0.83206088 | 0.83566894 | 0.83905868 | 0.84234095 | 0.84587667 | 0.84942337 | 0.85296011 | 0.85631618 | 0.8597494  | 0.86187425 | 0.86346547   |
| Canada                    | 0.81668506 | 0.82069625 | 0.82440227  | 0.8278011  | 0.83092811 | 0.83328829 | 0.83491566 | 0.8366251  | 0.83891368 | 0.84158367 | 0.84485349 | 0.84801783 | 0.85097805 | 0.85384495 | 0.85675993 | 0.85953239 | 0.86217423 | 0.86505383 | 0.86790554 | 0.87055448 | 0.87199263 | 0.87317068   |
| Greenland                 | 0.74085701 | 0.74628961 | 0.75287837  | 0.75944415 | 0.76540157 | 0.77209958 | 0.77914141 | 0.78532192 | 0.79144126 | 0.79702575 | 0.80300313 | 0.80810519 | 0.81168456 | 0.81436831 | 0.81627006 | 0.81771919 | 0.8189619  | 0.8197811  | 0.82081551 | 0.82234    | 0.82435903 | 0.82621034   |
| USA                       | 0.79231665 | 0.79667769 | 0.80040332  | 0.80322802 | 0.80530469 | 0.80603308 | 0.80678358 | 0.80968805 | 0.8145771  | 0.82029457 | 0.82588466 | 0.83026639 | 0.83395819 | 0.83741299 | 0.84074653 | 0.84437034 | 0.84800152 | 0.8516303  | 0.85504919 | 0.85857806 | 0.86079277 | 0.86244835   |
| Alabama                   | 0.75622621 | 0.7634569  | 0.76967632  | 0.77372193 | 0.77544902 | 0.7737957  | 0.77140728 | 0.77285401 | 0.77789235 | 0.78761845 | 0.79555018 | 0.80086662 | 0.8045349  | 0.80709759 | 0.80885174 | 0.81000381 | 0.81118185 | 0.81358806 | 0.81642184 | 0.82052655 | 0.82376572 | 0.82560514   |
| Alaska                    | 0.78083077 | 0.78521972 | 0.78898119  | 0.79202233 | 0.79491632 | 0.79540335 | 0.79443709 | 0.79555489 | 0.79964399 | 0.80548663 | 0.80994445 | 0.81596775 | 0.82090836 | 0.82457178 | 0.82889147 | 0.83450064 | 0.84015487 | 0.84488393 | 0.84859956 | 0.85332325 | 0.85613572 | 0.8575246    |
| Arizona                   | 0.75636002 | 0.75953736 | 0.76246412  | 0.76524979 | 0.76742559 | 0.76937805 | 0.77264764 | 0.77881287 | 0.78717604 | 0.7957     |            |            |            |            |            |            |            |            |            |            |            |              |



|                        |            |            |            |            |            |            |            |            |            |             |             |             |             |             |            |            |            |            |            |            |            |            |
|------------------------|------------|------------|------------|------------|------------|------------|------------|------------|------------|-------------|-------------|-------------|-------------|-------------|------------|------------|------------|------------|------------|------------|------------|------------|
| Nevada                 | 0.77461151 | 0.78005427 | 0.78373812 | 0.78586488 | 0.78656206 | 0.78549999 | 0.7856779  | 0.7907889  | 0.79990851 | 0.80957506  | 0.81742273  | 0.82207684  | 0.82500747  | 0.82696897  | 0.82767345 | 0.82752292 | 0.8278382  | 0.83048291 | 0.83515676 | 0.84159686 | 0.84571734 | 0.84768728 |
| New Hampshire          | 0.84029615 | 0.84544038 | 0.84970579 | 0.85248253 | 0.85443341 | 0.85516249 | 0.85570297 | 0.85704274 | 0.86065205 | 0.86473947  | 0.86873586  | 0.87242888  | 0.87575614  | 0.87850222  | 0.88140241 | 0.88525202 | 0.8880547  | 0.89179398 | 0.89440537 | 0.89650406 | 0.89742575 | 0.89826368 |
| New Jersey             | 0.83848901 | 0.84240382 | 0.84660477 | 0.85003077 | 0.85246915 | 0.85330488 | 0.85375873 | 0.85558551 | 0.85909792 | 0.86301163  | 0.86666814  | 0.86978633  | 0.87315008  | 0.87628333  | 0.87902439 | 0.88159339 | 0.88383729 | 0.8855529  | 0.88704083 | 0.88916574 | 0.89095974 | 0.89192244 |
| New Mexico             | 0.84758474 | 0.85190787 | 0.85553552 | 0.85837515 | 0.86050242 | 0.86140853 | 0.86245308 | 0.86599787 | 0.87194502 | 0.877932585 | 0.88679798  | 0.89288974  | 0.89800391  | 0.90270001  | 0.91139341 | 0.91550741 | 0.91864264 | 0.92352103 | 0.92749269 | 0.9294177  | 0.93176888 |            |
| New York               | 0.82716208 | 0.83122233 | 0.83486238 | 0.83795089 | 0.8404858  | 0.84207842 | 0.84362318 | 0.84623957 | 0.8494406  | 0.85309236  | 0.85699376  | 0.86048824  | 0.86382948  | 0.86721026  | 0.87037887 | 0.87317968 | 0.87567647 | 0.87796616 | 0.8800638  | 0.88222699 | 0.88398769 | 0.88517687 |
| North Carolina         | 0.77077581 | 0.77480776 | 0.77830555 | 0.78103261 | 0.78319075 | 0.78422871 | 0.78556983 | 0.78913744 | 0.79472081 | 0.80127194  | 0.80764867  | 0.8127426   | 0.81697851  | 0.82058114  | 0.82370885 | 0.82684578 | 0.83009444 | 0.83346043 | 0.83679007 | 0.84032264 | 0.84258991 | 0.84444531 |
| North Dakota           | 0.80659318 | 0.80925588 | 0.81089045 | 0.81204049 | 0.81248854 | 0.8124327  | 0.81248085 | 0.81435885 | 0.81775702 | 0.82128937  | 0.82529299  | 0.82907567  | 0.83370259  | 0.83918961  | 0.84572032 | 0.85272723 | 0.85878152 | 0.86332878 | 0.86677772 | 0.86946411 | 0.8714634  | 0.87303178 |
| Ohio                   | 0.7886042  | 0.79263071 | 0.79603592 | 0.79870679 | 0.80065882 | 0.80130891 | 0.80190295 | 0.80408154 | 0.80777078 | 0.81238808  | 0.81708476  | 0.82086955  | 0.82400733  | 0.82714939  | 0.83015518 | 0.83327117 | 0.83655872 | 0.83998301 | 0.84319001 | 0.84650352 | 0.84864434 | 0.85051343 |
| Oklahoma               | 0.75247452 | 0.75642876 | 0.76012639 | 0.76330169 | 0.76566904 | 0.76645306 | 0.7672088  | 0.76995141 | 0.77497592 | 0.78047461  | 0.78676629  | 0.79175017  | 0.79623219  | 0.80102825  | 0.80569204 | 0.80992102 | 0.81395989 | 0.81779762 | 0.82113423 | 0.82460971 | 0.82685731 | 0.82866324 |
| Oregon                 | 0.80004149 | 0.80454559 | 0.80836245 | 0.81147765 | 0.81383084 | 0.81497578 | 0.81617291 | 0.81890423 | 0.82313795 | 0.82804832  | 0.8328378   | 0.83671981  | 0.84001866  | 0.84333901  | 0.84688273 | 0.85094112 | 0.8552195  | 0.85929779 | 0.86294828 | 0.8663105  | 0.86836459 | 0.87017769 |
| Pennsylvania           | 0.81375928 | 0.81734631 | 0.82040861 | 0.82292176 | 0.8249734  | 0.82604657 | 0.82706427 | 0.82941159 | 0.83286198 | 0.83694557  | 0.84125132  | 0.8449341   | 0.8482014   | 0.85128821  | 0.85408598 | 0.85693113 | 0.85982866 | 0.86281186 | 0.86577408 | 0.86888627 | 0.87087915 | 0.87241675 |
| Rhode Island           | 0.8223186  | 0.82592596 | 0.8287903  | 0.83178457 | 0.83460619 | 0.83663359 | 0.83868594 | 0.84186213 | 0.84585046 | 0.85014421  | 0.85468085  | 0.85848081  | 0.86180964  | 0.8648276   | 0.86752102 | 0.87025444 | 0.87296488 | 0.87566678 | 0.87836046 | 0.88099217 | 0.88247115 | 0.88389348 |
| South Carolina         | 0.76652614 | 0.77076555 | 0.77450255 | 0.77729273 | 0.77920729 | 0.77960739 | 0.78010407 | 0.78291056 | 0.78809414 | 0.79443254  | 0.80091042  | 0.80618206  | 0.81048096  | 0.81424638  | 0.81750881 | 0.82066857 | 0.82338859 | 0.82714201 | 0.83027907 | 0.83361293 | 0.83580625 | 0.83771865 |
| South Dakota           | 0.78803856 | 0.79077123 | 0.79233892 | 0.79345023 | 0.79423175 | 0.79421848 | 0.79435773 | 0.79685798 | 0.80112718 | 0.80615925  | 0.81131194  | 0.8155374   | 0.81913629  | 0.82212513  | 0.82770429 | 0.83031611 | 0.83866908 | 0.84375543 | 0.84799196 | 0.85183974 | 0.85405383 | 0.85572087 |
| Tennessee              | 0.76107311 | 0.76423077 | 0.76694212 | 0.76976158 | 0.77260734 | 0.77576647 | 0.77676102 | 0.77757345 | 0.77967587 | 0.78274085  | 0.7892576   | 0.79424059  | 0.79836996  | 0.80248234  | 0.80651525 | 0.81149604 | 0.81647233 | 0.82085239 | 0.82464378 | 0.8284145  | 0.83091173 | 0.83303234 |
| Texas                  | 0.74903484 | 0.75299572 | 0.75643618 | 0.75911811 | 0.76117221 | 0.76203418 | 0.7632655  | 0.76692595 | 0.77287204 | 0.77907558  | 0.78669844  | 0.79242585  | 0.79736383  | 0.80334031  | 0.80747158 | 0.81284725 | 0.81801207 | 0.8228579  | 0.82687354 | 0.83058669 | 0.83288269 | 0.83478328 |
| Utah                   | 0.77590353 | 0.78009663 | 0.78341518 | 0.78583595 | 0.78742259 | 0.78794973 | 0.7888842  | 0.79235853 | 0.79807673 | 0.80480725  | 0.81132807  | 0.81656466  | 0.82078805  | 0.82476785  | 0.82866233 | 0.83207259 | 0.83765989 | 0.84209526 | 0.84621962 | 0.8501301  | 0.85256905 | 0.85461679 |
| Vermont                | 0.82817222 | 0.83198085 | 0.83551304 | 0.83878558 | 0.84189602 | 0.84401485 | 0.84594287 | 0.8486519  | 0.85197197 | 0.85531919  | 0.85872895  | 0.86189018  | 0.86485876  | 0.86798383  | 0.87125207 | 0.87481964 | 0.87833683 | 0.8815877  | 0.88452235 | 0.88722315 | 0.88867724 | 0.88999999 |
| Virginia               | 0.81219476 | 0.81590062 | 0.81933188 | 0.82250774 | 0.8253964  | 0.82758542 | 0.82995382 | 0.83381356 | 0.83874169 | 0.84410621  | 0.84938871  | 0.85368094  | 0.85720844  | 0.86024216  | 0.86282264 | 0.8653471  | 0.86802926 | 0.87085374 | 0.87369732 | 0.87680399 | 0.8786606  | 0.8801199  |
| Washington             | 0.81463575 | 0.81898821 | 0.82262036 | 0.82537505 | 0.82758068 | 0.8284537  | 0.82931957 | 0.83170398 | 0.83531685 | 0.83948385  | 0.84369776  | 0.84731836  | 0.85078179  | 0.85426781  | 0.85775008 | 0.8613466  | 0.86494843 | 0.86857319 | 0.87188454 | 0.87493693 | 0.87649116 | 0.87758484 |
| West Virginia          | 0.75672341 | 0.75994047 | 0.76292799 | 0.76573938 | 0.76847246 | 0.77044071 | 0.77366599 | 0.77649691 | 0.7801167  | 0.7723549   | 0.77702527  | 0.78069254  | 0.78381686  | 0.78743297  | 0.79146958 | 0.79591759 | 0.80041998 | 0.80464921 | 0.80861081 | 0.81284408 | 0.81563762 | 0.81771351 |
| Wisconsin              | 0.81282335 | 0.81619951 | 0.81920468 | 0.82161328 | 0.8234171  | 0.8242381  | 0.82515004 | 0.82724699 | 0.83049166 | 0.83452608  | 0.83875451  | 0.8424053   | 0.84566819  | 0.84895952  | 0.8522444  | 0.85567348 | 0.85909193 | 0.86235081 | 0.86537871 | 0.86843457 | 0.87032746 | 0.8717261  |
| Wyoming                | 0.78565335 | 0.789883   | 0.79369659 | 0.79716501 | 0.80001754 | 0.80182422 | 0.80402247 | 0.80782535 | 0.81331096 | 0.8187435   | 0.82428207  | 0.82878864  | 0.83251057  | 0.83601344  | 0.83964154 | 0.84343901 | 0.84726434 | 0.85105917 | 0.85469332 | 0.85833834 | 0.86052084 | 0.86214872 |
| Southern Latin America | 0.64123743 | 0.64640307 | 0.64982584 | 0.65252524 | 0.65571888 | 0.66051913 | 0.66438624 | 0.6673925  | 0.67068862 | 0.67415239  | 0.67876122  | 0.68413428  | 0.68842791  | 0.69171599  | 0.69605935 | 0.70287273 | 0.71078773 | 0.71754842 | 0.72495216 | 0.73113382 | 0.73963672 | 0.73598472 |
| Argentina              | 0.63819447 | 0.6421755  | 0.64447251 | 0.64599658 | 0.64829683 | 0.65336883 | 0.6574459  | 0.66018758 | 0.66307924 | 0.66591194  | 0.66992588  | 0.6752427   | 0.67921824  | 0.68361321  | 0.68947451 | 0.69710113 | 0.69686103 | 0.70513553 | 0.71288869 | 0.71900284 | 0.7212943  | 0.72312297 |
| Chile                  | 0.65298903 | 0.66026551 | 0.66788841 | 0.67435953 | 0.67825821 | 0.68255891 | 0.68589275 | 0.68893032 | 0.69235979 | 0.69662014  | 0.7023047   | 0.70839974  | 0.71474348  | 0.72044878  | 0.72727593 | 0.73609088 | 0.74497222 | 0.75208808 | 0.75862571 | 0.76512032 | 0.77219472 |            |
| Uruguay                | 0.62320829 | 0.62579607 | 0.62882888 | 0.63143777 | 0.63421691 | 0.63697577 | 0.6405907  | 0.64633171 | 0.65352552 | 0.66032113  | 0.66690914  | 0.67067973  | 0.67680219  | 0.68282836  | 0.68905951 | 0.6981673  | 0.69918946 | 0.70690493 | 0.71253659 | 0.71616977 | 0.71928344 |            |
| Western Europe         | 0.78740001 | 0.7909044  | 0.79416518 | 0.79696151 | 0.79971572 | 0.80241404 | 0.80506685 | 0.80772333 | 0.8104838  | 0.81311022  | 0.81614217  | 0.81937524  | 0.82263373  | 0.8257869   | 0.82860951 | 0.83132118 | 0.83421602 | 0.83752217 | 0.84083355 | 0.84421211 | 0.84655036 | 0.84872632 |
| Andorra                | 0.78197651 | 0.78541703 | 0.79015876 | 0.79272789 | 0.80473198 | 0.81221398 | 0.81978726 | 0.82661725 | 0.83821721 | 0.83592989  | 0.83948997  | 0.8427948   | 0.84581083  | 0.84832991  | 0.85101049 | 0.85359122 | 0.85625705 | 0.85947703 | 0.86258895 | 0.86562102 | 0.86749417 | 0.86944411 |
| Austria                | 0.79184768 | 0.79577012 | 0.79915412 | 0.80240325 | 0.80488914 | 0.80841919 | 0.81206461 | 0.81548052 | 0.81879366 | 0.82154117  | 0.82450011  | 0.828002    | 0.83111331  | 0.83367978  | 0.83583858 | 0.8375799  | 0.83988379 | 0.84317333 | 0.84661447 | 0.84986251 | 0.85202039 | 0.853837   |
| Belgium                | 0.80739633 | 0.81471304 | 0.81888605 | 0.82201438 | 0.82522494 | 0.82849724 | 0.83152726 | 0.83461266 | 0.83775794 | 0.84105583  | 0.843503021 | 0.846194036 | 0.848224602 | 0.850861983 | 0.85342505 | 0.85583784 | 0.85946294 | 0.86321204 | 0.86716763 | 0.87049839 | 0.8734665  | 0.87564502 |
| Cyprus                 | 0.7451903  | 0.75359472 | 0.76150247 | 0.76789022 | 0.77376477 | 0.77903136 | 0.78456096 | 0.79026838 | 0.79645409 | 0.80311209  | 0.80984919  | 0.81372613  | 0.81697853  | 0.8198306   | 0.8211843  | 0.82273285 | 0.82428362 | 0.82613988 | 0.82834324 | 0.83098073 | 0.83305952 | 0.83563055 |
| Denmark                | 0.8391843  | 0.84317775 | 0.84708636 | 0.85044133 | 0.8533041  | 0.85569073 | 0.85803321 | 0.85987813 | 0.86178206 | 0.86394805  | 0.86676708  | 0.86977868  | 0.87251751  | 0.87493297  | 0.87681493 | 0.87854394 | 0.88058978 | 0.88368849 | 0.88752985 | 0.89162457 | 0.8943683  | 0.8964242  |
| Finland                | 0.78995823 | 0.79445383 | 0.79877027 | 0.80232543 | 0.80569423 | 0.80893679 | 0.81208148 | 0.81559761 | 0.81887554 | 0.82145759  | 0.82444028  | 0.82827058  | 0.83143448  | 0.8344254   | 0.83743187 | 0.84087848 | 0.84462234 | 0.84858613 | 0.85220294 | 0.8556518  | 0.85765555 | 0.85983137 |
| France                 | 0.77279203 | 0.77622516 | 0.78008887 | 0.78317876 | 0.78608465 | 0.78904209 | 0.79232192 | 0.79555765 | 0.79817473 | 0.80050867  | 0.80324255  | 0.80637874  | 0.80961539  | 0.81298402  | 0.81655145 | 0.82022389 | 0.82373093 | 0.82709844 | 0.83044859 | 0.8337728  | 0.83604944 | 0.83836488 |
| Germany                | 0.84892576 | 0.85207041 | 0.85506679 | 0.85767579 | 0.86024033 | 0.86289418 | 0.86587371 | 0.86914044 | 0.87255285 | 0.87587991  | 0.8794671   | 0.88302175  | 0.8865641   | 0.88925695  | 0.89287651 | 0.8966161  | 0.89886785 | 0.89980637 | 0.9045047  | 0.89697555 | 0.8997016  | 0.90143861 |
| Greece                 | 0.73271054 | 0.73715401 | 0.74194522 | 0.74718596 | 0.75241861 | 0.7563844  | 0.7602097  | 0.76392177 | 0.76752766 | 0.77124736  |             |             |             |             |            |            |            |            |            |            |            |            |



|                         |            |            |            |            |            |            |             |            |             |            |            |            |            |            |            |             |             |             |             |            |            |            |
|-------------------------|------------|------------|------------|------------|------------|------------|-------------|------------|-------------|------------|------------|------------|------------|------------|------------|-------------|-------------|-------------|-------------|------------|------------|------------|
| Luxembourg              | 0.82200657 | 0.82531282 | 0.82822349 | 0.83098395 | 0.83367257 | 0.83667526 | 0.84057445  | 0.84470701 | 0.84797888  | 0.85066873 | 0.85325828 | 0.85621683 | 0.85978903 | 0.86336879 | 0.86696936 | 0.87011294  | 0.87342088  | 0.87637468  | 0.8786379   | 0.8805939  | 0.88249532 | 0.88442896 |
| Malta                   | 0.71180525 | 0.71780304 | 0.72279027 | 0.72751113 | 0.73193385 | 0.73618875 | 0.74014018  | 0.74423781 | 0.74842271  | 0.75217106 | 0.75625055 | 0.76031055 | 0.76453788 | 0.76861614 | 0.77272874 | 0.77726791  | 0.78167531  | 0.78641018  | 0.79096562  | 0.79519785 | 0.79837517 | 0.80158503 |
| Monaco                  | 0.86897358 | 0.87109475 | 0.87318277 | 0.87519765 | 0.87723155 | 0.87928809 | 0.88127415  | 0.88326229 | 0.88531339  | 0.88732828 | 0.88926284 | 0.89123759 | 0.89307382 | 0.89486447 | 0.89654787 | 0.89835634  | 0.9000513   | 0.90175271  | 0.90338869  | 0.90503099 | 0.90668544 | 0.90826283 |
| Netherlands             | 0.83191398 | 0.83351815 | 0.83567608 | 0.84163948 | 0.84480055 | 0.84859788 | 0.85279319  | 0.85735939 | 0.86236847  | 0.86780604 | 0.87365153 | 0.87991253 | 0.88668063 | 0.89384298 | 0.90150015 | 0.90967805  | 0.9184891   | 0.92784805  | 0.93790015  | 0.94864384 | 0.95955857 | 0.97096426 |
| Norway                  | 0.84647545 | 0.85211194 | 0.85765789 | 0.86302358 | 0.86834681 | 0.87362179 | 0.87885883  | 0.88409297 | 0.889274512 | 0.89443828 | 0.89953838 | 0.90459167 | 0.90961048 | 0.91459955 | 0.91959264 | 0.92458419  | 0.92954405  | 0.93447178  | 0.93930617  | 0.94414926 | 0.94891138 | 0.95368296 |
| Agder                   | 0.835206   | 0.84113718 | 0.84578887 | 0.84886127 | 0.85123076 | 0.85324717 | 0.85511314  | 0.85711177 | 0.85964656  | 0.863013   | 0.86775717 | 0.8728041  | 0.87766051 | 0.88240259 | 0.88646454 | 0.89023755  | 0.89391665  | 0.89749111  | 0.90098392  | 0.90436101 | 0.90618338 | 0.90748954 |
| Innlandet               | 0.82887656 | 0.83407175 | 0.83855199 | 0.84213011 | 0.84545935 | 0.84817672 | 0.85025528  | 0.85198146 | 0.85389993  | 0.85647485 | 0.86025388 | 0.86429668 | 0.86850093 | 0.87274681 | 0.87668321 | 0.88069691  | 0.88472309  | 0.88869096  | 0.89239856  | 0.89598152 | 0.89880857 | 0.89975406 |
| Møre og Romsdal         | 0.83271586 | 0.83838194 | 0.84312554 | 0.84689381 | 0.85036074 | 0.85329532 | 0.85573521  | 0.85788948 | 0.86034628  | 0.86376497 | 0.86864624 | 0.87373355 | 0.87876255 | 0.88199174 | 0.88583973 | 0.88949011  | 0.89335062  | 0.89693686  | 0.90026227  | 0.90339563 | 0.9057401  | 0.90742629 |
| Nordland                | 0.81744423 | 0.82030433 | 0.82759556 | 0.83068046 | 0.83356025 | 0.83570012 | 0.83729213  | 0.8385198  | 0.84015423  | 0.84295699 | 0.84755707 | 0.85268038 | 0.85783537 | 0.86292616 | 0.86768087 | 0.87260291  | 0.87791292  | 0.8830385   | 0.88784245  | 0.8922541  | 0.89505198 | 0.89694228 |
| Oslo                    | 0.88602844 | 0.89230445 | 0.89618757 | 0.89909056 | 0.90174914 | 0.90422240 | 0.90644455  | 0.90866384 | 0.91121623  | 0.91441107 | 0.91810535 | 0.92169992 | 0.92485806 | 0.92795307 | 0.93076681 | 0.9343734   | 0.93625252  | 0.93878562  | 0.94101721  | 0.94300674 | 0.94451283 | 0.94569179 |
| Rogaland                | 0.84475928 | 0.85055916 | 0.85498429 | 0.85824602 | 0.86126299 | 0.86390076 | 0.86634491  | 0.86847041 | 0.86848793  | 0.87109461 | 0.87519366 | 0.87975868 | 0.88423191 | 0.88871555 | 0.8927068  | 0.89649723  | 0.90046203  | 0.90422208  | 0.90784815  | 0.91113922 | 0.91530965 | 0.91508373 |
| Troms og Finnmark       | 0.82812721 | 0.83378226 | 0.83857985 | 0.84214319 | 0.84513613 | 0.84721552 | 0.84880157  | 0.85022512 | 0.85222337  | 0.8536188  | 0.85609487 | 0.8667806  | 0.87234976 | 0.87374784 | 0.88147376 | 0.8853693   | 0.88954817  | 0.89336986  | 0.89697248  | 0.90055047 | 0.90326508 | 0.9051632  |
| Trøndelag               | 0.83751572 | 0.84344422 | 0.84849593 | 0.85243037 | 0.85574463 | 0.85854685 | 0.86096613  | 0.86338902 | 0.86648419  | 0.87047319 | 0.87559483 | 0.88072764 | 0.8855232  | 0.89017439 | 0.89598584 | 0.89755853  | 0.90132784  | 0.90493847  | 0.90832629  | 0.9117067  | 0.91425533 | 0.91597759 |
| Vestfold og Telemark    | 0.83906155 | 0.84466068 | 0.84933615 | 0.85273725 | 0.85557901 | 0.85791226 | 0.85977761  | 0.86148978 | 0.8636156   | 0.86641602 | 0.87024156 | 0.87417044 | 0.87811767 | 0.88205605 | 0.8857214  | 0.88943605  | 0.89319456  | 0.89691397  | 0.90049229  | 0.90394682 | 0.9058719  | 0.90730742 |
| Vestland                | 0.84276313 | 0.8486332  | 0.85347442 | 0.85716964 | 0.86051206 | 0.86332923 | 0.86592234  | 0.8684169  | 0.87168977  | 0.87581105 | 0.8800681  | 0.88446835 | 0.88895936 | 0.89264388 | 0.89625125 | 0.89984226  | 0.90370657  | 0.9073585   | 0.91064885  | 0.91367553 | 0.91595806 | 0.91796299 |
| Viken                   | 0.85847148 | 0.86327925 | 0.86714811 | 0.87006156 | 0.8726784  | 0.87484938 | 0.8764248   | 0.87673685 | 0.87764793  | 0.8798049  | 0.8831166  | 0.88654101 | 0.88986353 | 0.89322663 | 0.89630876 | 0.89929186  | 0.90253007  | 0.9056458   | 0.90854788  | 0.91122676 | 0.9132344  | 0.91469261 |
| Portugal                | 0.66161085 | 0.66724715 | 0.67258394 | 0.67766341 | 0.68235293 | 0.6868871  | 0.6911588   | 0.69497485 | 0.6986046   | 0.7022234  | 0.70656355 | 0.71126289 | 0.71580408 | 0.71983699 | 0.72302128 | 0.72752622  | 0.72830085  | 0.73122553  | 0.73440295  | 0.73809048 | 0.74103738 | 0.74415185 |
| San Marino              | 0.85969536 | 0.86374776 | 0.86658059 | 0.86752201 | 0.86928713 | 0.8709796  | 0.87265215  | 0.87430725 | 0.87591887  | 0.87770523 | 0.87944081 | 0.88119752 | 0.88292453 | 0.88459263 | 0.88535369 | 0.88649337  | 0.88747766  | 0.888455761 | 0.888513352 | 0.88620066 | 0.88686794 | 0.88800547 |
| Spain                   | 0.69705603 | 0.70172607 | 0.70630965 | 0.71067858 | 0.71488623 | 0.71871729 | 0.72197013  | 0.72521144 | 0.72941104  | 0.73395605 | 0.73835206 | 0.74209645 | 0.74518187 | 0.74765198 | 0.74980093 | 0.75226982  | 0.75475794  | 0.75766328  | 0.76065957  | 0.76394292 | 0.76650603 | 0.7692837  |
| Sweden                  | 0.83302811 | 0.8359564  | 0.83874153 | 0.84166314 | 0.84450688 | 0.84687634 | 0.84911587  | 0.85142085 | 0.85370585  | 0.85570275 | 0.85827294 | 0.86189238 | 0.86470667 | 0.86738377 | 0.86992333 | 0.87238851  | 0.87466165  | 0.87712061  | 0.87988891  | 0.88298412 | 0.88506201 | 0.88688303 |
| Stockholm               | 0.86874746 | 0.87169989 | 0.87423166 | 0.87670657 | 0.87925644 | 0.88182691 | 0.88385143  | 0.88624949 | 0.88886385  | 0.89112829 | 0.8943043  | 0.89749399 | 0.90023896 | 0.9023454  | 0.90473172 | 0.90633999  | 0.90830839  | 0.91004256  | 0.9119315   | 0.91389868 | 0.91544818 | 0.91662271 |
| Sweden except Stockholm | 0.82728713 | 0.82562154 | 0.82844554 | 0.83145624 | 0.83433632 | 0.83666605 | 0.83885815  | 0.84106732 | 0.84317932  | 0.84498859 | 0.84785759 | 0.85089033 | 0.85389827 | 0.85616454 | 0.85858364 | 0.86086365  | 0.86292915  | 0.86503007  | 0.86803189  | 0.87118114 | 0.87330347 | 0.87511515 |
| Switzerland             | 0.88524353 | 0.88844595 | 0.89009281 | 0.89278081 | 0.89490981 | 0.89727263 | 0.8999623   | 0.90291341 | 0.90577845  | 0.90805    | 0.91053052 | 0.91327657 | 0.91571489 | 0.91795501 | 0.91999418 | 0.92183299  | 0.9239306   | 0.92620229  | 0.92855059  | 0.9306821  | 0.93207624 | 0.93305911 |
| UK                      | 0.78921896 | 0.79351317 | 0.79665556 | 0.79918611 | 0.80195087 | 0.80448919 | 0.80681705  | 0.80935277 | 0.81203299  | 0.81479464 | 0.81803399 | 0.821719   | 0.82645375 | 0.83150867 | 0.83551664 | 0.83895192  | 0.84246023  | 0.84626362  | 0.8496979   | 0.85413057 | 0.85692029 | 0.85900018 |
| England                 | 0.79121817 | 0.79572874 | 0.79893122 | 0.80142212 | 0.80422916 | 0.80687605 | 0.80929741  | 0.81187828 | 0.8145103   | 0.81714915 | 0.82024807 | 0.82388806 | 0.82814719 | 0.83147598 | 0.83282875 | 0.8345103   | 0.84045013  | 0.84919211  | 0.8530158   | 0.85723951 | 0.85984675 | 0.86143731 |
| East Midlands           | 0.76650495 | 0.77091617 | 0.77397467 | 0.7763029  | 0.77888155 | 0.78127626 | 0.78381163  | 0.78649778 | 0.78924404  | 0.79207487 | 0.79372244 | 0.79731194 | 0.80229019 | 0.8076191  | 0.81163509 | 0.81514094  | 0.8188665   | 0.82302766  | 0.82710738  | 0.83165984 | 0.83424814 | 0.83585605 |
| Derby                   | 0.77727355 | 0.78168517 | 0.78481718 | 0.78724388 | 0.78985701 | 0.79167985 | 0.79300453  | 0.79465739 | 0.79702261  | 0.80003206 | 0.8032148  | 0.80666595 | 0.8120513  | 0.81803361 | 0.82281919 | 0.82710299  | 0.83102614  | 0.83472001  | 0.83797194  | 0.84175987 | 0.84430589 | 0.84601068 |
| Derbyshire              | 0.75576888 | 0.75958277 | 0.76190732 | 0.76326194 | 0.76493949 | 0.76673709 | 0.76862781  | 0.7704933  | 0.7720735   | 0.77373934 | 0.77647066 | 0.78049547 | 0.78658728 | 0.79317459 | 0.79811537 | 0.80233342  | 0.80655966  | 0.81102755  | 0.81538806  | 0.81982696 | 0.82255145 | 0.82428381 |
| Leicester               | 0.75814382 | 0.76226668 | 0.76531609 | 0.76805804 | 0.77149691 | 0.77486092 | 0.778783426 | 0.78095923 | 0.78457021  | 0.78835353 | 0.79265757 | 0.79717113 | 0.80261218 | 0.80690263 | 0.81011027 | 0.81260416  | 0.81521784  | 0.81815553  | 0.8212361   | 0.82503059 | 0.82784817 | 0.8290671  |
| Leicestershire          | 0.79142005 | 0.79524665 | 0.79788962 | 0.80013468 | 0.80299005 | 0.80592575 | 0.80876558  | 0.81154376 | 0.81400821  | 0.81584611 | 0.81780299 | 0.82019958 | 0.82408761 | 0.82853589 | 0.83164571 | 0.83422482  | 0.83734304  | 0.84095748  | 0.84444094  | 0.84821489 | 0.85046112 | 0.85188895 |
| Lincolnshire            | 0.75489142 | 0.75899655 | 0.76164522 | 0.76338967 | 0.7651122  | 0.76660914 | 0.76770246  | 0.76860633 | 0.76969597  | 0.77149597 | 0.77416751 | 0.777765   | 0.78314061 | 0.78899952 | 0.79364411 | 0.79878562  | 0.80214629  | 0.80683445  | 0.81131396  | 0.81623843 | 0.81944532 | 0.82136376 |
| Northamptonshire        | 0.77258434 | 0.77623332 | 0.77860274 | 0.78020194 | 0.78186061 | 0.78325157 | 0.78452215  | 0.78612642 | 0.78786248  | 0.78985085 | 0.79273203 | 0.7966712  | 0.8024164  | 0.80860972 | 0.81311018 | 0.81686085  | 0.82082775  | 0.82538893  | 0.82991887  | 0.83481513 | 0.83788898 | 0.83963536 |
| Nottingham              | 0.79161737 | 0.79628495 | 0.79981123 | 0.80292014 | 0.80603745 | 0.80887743 | 0.81175174  | 0.8152604  | 0.81938004  | 0.82305858 | 0.82612397 | 0.82906958 | 0.83250605 | 0.83595844 | 0.83871921 | 0.84121217  | 0.84415762  | 0.8475535   | 0.85104215  | 0.85501249 | 0.85740749 | 0.85887136 |
| Nottinghamshire         | 0.75850171 | 0.76236891 | 0.76487914 | 0.76661287 | 0.76879528 | 0.77084519 | 0.77265148  | 0.77435406 | 0.77595881  | 0.77744296 | 0.77962092 | 0.78274283 | 0.78752169 | 0.79283125 | 0.79868465 | 0.80449784  | 0.80445653  | 0.80905635  | 0.8136382   | 0.81843411 | 0.82131702 | 0.82300786 |
| Rutland                 | 0.79691224 | 0.79964297 | 0.80161127 | 0.8032844  | 0.80524775 | 0.80723545 | 0.80935123  | 0.81166631 | 0.81374273  | 0.8158297  | 0.81865441 | 0.82176025 | 0.82565923 | 0.82991478 | 0.83430509 | 0.838643048 | 0.843943789 | 0.84826561  | 0.85478287  | 0.84937926 | 0.8514898  | 0.85273375 |
| East of England         | 0.78730323 | 0.79188721 | 0.79524007 | 0.79792144 | 0.80087581 | 0.80356092 | 0.80588557  | 0.80824658 | 0.81069862  | 0.8131755  | 0.81602737 | 0.81922047 | 0.8235436  | 0.82846015 | 0.83243445 | 0.83592015  | 0.83956490  | 0.84362321  | 0.84767327  | 0.85232171 | 0.85481968 | 0.85640792 |
| Bedford                 | 0.79524673 | 0.79924353 | 0.80228154 | 0.80485986 | 0.80756347 | 0.8101     |             |            |             |            |            |            |            |            |            |             |             |             |             |            |            |            |

|                        |            |            |            |            |            |            |            |             |            |            |            |            |            |            |            |             |            |            |            |            |            |            |
|------------------------|------------|------------|------------|------------|------------|------------|------------|-------------|------------|------------|------------|------------|------------|------------|------------|-------------|------------|------------|------------|------------|------------|------------|
| Havering               | 0.76311541 | 0.76796765 | 0.77155728 | 0.77422203 | 0.77764239 | 0.78130919 | 0.78450011 | 0.787330519 | 0.79005801 | 0.79238045 | 0.79480725 | 0.79793974 | 0.80220709 | 0.8067285  | 0.81023208 | 0.81353735  | 0.81715744 | 0.82119701 | 0.82536884 | 0.82993939 | 0.83279668 | 0.83464387 |
| Hillingdon             | 0.83113758 | 0.83595895 | 0.83958379 | 0.84203799 | 0.84417612 | 0.8459004  | 0.8473667  | 0.84901091  | 0.85104679 | 0.8538497  | 0.85691681 | 0.86045264 | 0.86465609 | 0.87020527 | 0.87423136 | 0.878962208 | 0.87948897 | 0.88235448 | 0.8852682  | 0.88848906 | 0.89126898 | 0.89313813 |
| Hounslow               | 0.82420358 | 0.8291261  | 0.83268461 | 0.83526961 | 0.83797114 | 0.84048106 | 0.84263564 | 0.8448453   | 0.84698829 | 0.84887254 | 0.85132605 | 0.85509044 | 0.86064099 | 0.86695427 | 0.87206699 | 0.87641897  | 0.88066009 | 0.88492488 | 0.88885189 | 0.89300646 | 0.8953523  | 0.8969458  |
| Islington              | 0.87150706 | 0.87508324 | 0.87763267 | 0.87984139 | 0.88237152 | 0.8849225  | 0.8876219  | 0.89057345  | 0.89372454 | 0.89718662 | 0.90071369 | 0.90419345 | 0.90750645 | 0.91031388 | 0.91232004 | 0.91401443  | 0.91575754 | 0.91763015 | 0.91961203 | 0.9217552  | 0.92352931 | 0.92474007 |
| Kennington and Chelsea | 0.90843189 | 0.91006559 | 0.91150955 | 0.91296531 | 0.9147092  | 0.91641701 | 0.91834677 | 0.9204801   | 0.92272821 | 0.92509751 | 0.92750215 | 0.93009406 | 0.93266445 | 0.93489899 | 0.93658587 | 0.93796648  | 0.93925173 | 0.94116257 | 0.94266851 | 0.94420575 | 0.94506014 | 0.9464767  |
| Kingston upon Thames   | 0.85603353 | 0.86055739 | 0.86411828 | 0.86704239 | 0.87006145 | 0.87296388 | 0.87577009 | 0.8787043   | 0.88166979 | 0.88462929 | 0.88761596 | 0.88829931 | 0.89081257 | 0.893262   | 0.89490464 | 0.89636244  | 0.89828529 | 0.90080218 | 0.90347627 | 0.90637444 | 0.90780389 | 0.90869828 |
| Lambeth                | 0.83752619 | 0.84261357 | 0.84614767 | 0.84958141 | 0.85362941 | 0.85770494 | 0.86183536 | 0.86616036  | 0.87025638 | 0.87409945 | 0.87835678 | 0.88282194 | 0.88775428 | 0.89275294 | 0.8967257  | 0.90014163  | 0.9034326  | 0.90685971 | 0.91016639 | 0.91356358 | 0.91535783 | 0.91638082 |
| Lewisham               | 0.7892805  | 0.79422735 | 0.79790394 | 0.80066658 | 0.8032108  | 0.80553478 | 0.80769716 | 0.81006311  | 0.81249982 | 0.8149258  | 0.81793909 | 0.82158935 | 0.82660821 | 0.8321343  | 0.83639314 | 0.83983936  | 0.8432392  | 0.8468051  | 0.85023211 | 0.85395556 | 0.8567039  | 0.85730894 |
| Merton                 | 0.82330884 | 0.82786023 | 0.83118703 | 0.83348895 | 0.83576605 | 0.83767292 | 0.83947687 | 0.84182137  | 0.84484647 | 0.84673501 | 0.8492308  | 0.85250906 | 0.85734091 | 0.86259802 | 0.86664475 | 0.87005724  | 0.8733615  | 0.87673744 | 0.88013501 | 0.88413348 | 0.88650159 | 0.88773396 |
| Newham                 | 0.7493282  | 0.75550038 | 0.76051169 | 0.7649267  | 0.76947164 | 0.77330625 | 0.77643043 | 0.7797725   | 0.78301783 | 0.78655411 | 0.79145262 | 0.79744619 | 0.80471522 | 0.81192357 | 0.81712044 | 0.82111356  | 0.82500948 | 0.82916684 | 0.83304735 | 0.83732911 | 0.84060801 | 0.84168813 |
| Redbridge              | 0.7823136  | 0.79184885 | 0.79547287 | 0.79841522 | 0.801404   | 0.80383152 | 0.80618249 | 0.80887257  | 0.81103299 | 0.81247961 | 0.81454633 | 0.81772521 | 0.82253196 | 0.8277521  | 0.83155791 | 0.83436611  | 0.8371229  | 0.84019408 | 0.84320787 | 0.84679322 | 0.84962048 | 0.85026508 |
| Richmond upon Thames   | 0.87717294 | 0.88124833 | 0.88434753 | 0.88689502 | 0.88938374 | 0.89154436 | 0.89359517 | 0.89581427  | 0.89795278 | 0.8995988  | 0.90163792 | 0.9043754  | 0.90773191 | 0.91139663 | 0.91465004 | 0.91772744  | 0.92077201 | 0.9239154  | 0.92695264 | 0.92995653 | 0.93132447 | 0.93213255 |
| Southwark              | 0.85185331 | 0.85723068 | 0.8612693  | 0.8647362  | 0.86753676 | 0.86990066 | 0.87252757 | 0.87568665  | 0.87926389 | 0.88306436 | 0.8870974  | 0.8916206  | 0.89642638 | 0.9007784  | 0.90380911 | 0.90660481  | 0.90835988 | 0.91095918 | 0.91345716 | 0.91602589 | 0.91846648 | 0.91959893 |
| Sutton                 | 0.79482141 | 0.79972559 | 0.80326486 | 0.80604838 | 0.80871934 | 0.81083275 | 0.8126601  | 0.81467805  | 0.8167627  | 0.81875456 | 0.82118182 | 0.82433217 | 0.82895974 | 0.83413145 | 0.83836008 | 0.84190373  | 0.84524533 | 0.84855633 | 0.85157254 | 0.85303627 | 0.85471221 | 0.85642158 |
| Tower Hamlets          | 0.82560101 | 0.83049202 | 0.83477264 | 0.83914333 | 0.84429237 | 0.84943443 | 0.85493829 | 0.85841338  | 0.86236273 | 0.8667264  | 0.87145478 | 0.87623418 | 0.88124895 | 0.88630276 | 0.89149273 | 0.89684824  | 0.9023193  | 0.90799702 | 0.91405103 | 0.92010503 | 0.92615903 | 0.93221303 |
| Waltham Forest         | 0.76692302 | 0.77158819 | 0.77497571 | 0.77763364 | 0.78052014 | 0.78297295 | 0.78490751 | 0.78678602  | 0.78857743 | 0.79042113 | 0.79305762 | 0.79682894 | 0.80251966 | 0.80910434 | 0.81450239 | 0.81900025  | 0.82330467 | 0.82778592 | 0.83204346 | 0.83644284 | 0.83920216 | 0.84059066 |
| Wandsworth             | 0.86930362 | 0.87407677 | 0.87806773 | 0.88146394 | 0.88472489 | 0.88765211 | 0.89051156 | 0.89344408  | 0.89620639 | 0.89893738 | 0.90052498 | 0.90286992 | 0.90572514 | 0.9088197  | 0.91129499 | 0.91346773  | 0.9157198  | 0.91806224 | 0.92033556 | 0.922739   | 0.92370388 | 0.92424149 |
| Westminster            | 0.89395024 | 0.89655897 | 0.8986167  | 0.90046019 | 0.90251471 | 0.90464551 | 0.90703524 | 0.90966241  | 0.91235581 | 0.91472829 | 0.9164292  | 0.91839146 | 0.92113793 | 0.92391496 | 0.92595501 | 0.92756193  | 0.92927966 | 0.93114166 | 0.93286599 | 0.93462227 | 0.93611797 | 0.93719863 |
| North East England     | 0.75517656 | 0.76000092 | 0.76344209 | 0.76610925 | 0.76900843 | 0.77181052 | 0.77460176 | 0.77761649  | 0.78094179 | 0.78306961 | 0.78615205 | 0.79003667 | 0.79540193 | 0.80107439 | 0.80511943 | 0.80829669  | 0.81151855 | 0.81514928 | 0.8188021  | 0.82310774 | 0.82571259 | 0.82727303 |
| County Durham          | 0.74518594 | 0.74970548 | 0.75271731 | 0.75490689 | 0.75746944 | 0.76012681 | 0.76250071 | 0.76518332  | 0.76809846 | 0.77067482 | 0.77361282 | 0.77744124 | 0.78260244 | 0.78797616 | 0.79160399 | 0.79445489  | 0.79755543 | 0.80101293 | 0.80429708 | 0.80820503 | 0.81071906 | 0.81227652 |
| Darlington             | 0.75775031 | 0.76146668 | 0.76419889 | 0.76635394 | 0.76923012 | 0.77273096 | 0.77650942 | 0.7801142   | 0.7843178  | 0.78815951 | 0.7825023  | 0.79002344 | 0.79688458 | 0.80457829 | 0.81037357 | 0.81514191  | 0.81963678 | 0.82406911 | 0.82807476 | 0.83254584 | 0.83546751 | 0.83720409 |
| Gateshead              | 0.75234321 | 0.75731376 | 0.76222134 | 0.76454565 | 0.76791895 | 0.77124027 | 0.77429699 | 0.77713292  | 0.77945133 | 0.78248103 | 0.78714876 | 0.79238245 | 0.79833724 | 0.80419905 | 0.80822169 | 0.8114731   | 0.81513915 | 0.8192259  | 0.82258115 | 0.82623236 | 0.82866343 | 0.83024418 |
| Hartlepool             | 0.71845461 | 0.72284249 | 0.72662898 | 0.72730131 | 0.72916009 | 0.73082238 | 0.73313271 | 0.73627497  | 0.73904738 | 0.7413062  | 0.74413561 | 0.74873543 | 0.75654915 | 0.76493273 | 0.77058336 | 0.77476807  | 0.77898656 | 0.78363469 | 0.78841263 | 0.79367659 | 0.796959   | 0.79887777 |
| Middlesbrough          | 0.73196823 | 0.73688981 | 0.73963252 | 0.74149081 | 0.74415086 | 0.74749801 | 0.75101106 | 0.754776    | 0.75789713 | 0.75984869 | 0.76201042 | 0.76535148 | 0.77078309 | 0.77641283 | 0.78004115 | 0.78249349  | 0.78498498 | 0.78812686 | 0.7915783  | 0.79618331 | 0.79943482 | 0.801471   |
| Newcastle upon Tyne    | 0.80202396 | 0.80722356 | 0.81229027 | 0.8171593  | 0.82195979 | 0.82625526 | 0.8305273  | 0.835104    | 0.83961735 | 0.84325483 | 0.8461954  | 0.84904908 | 0.85248202 | 0.85585328 | 0.85836593 | 0.86022435  | 0.86188351 | 0.86398528 | 0.86641485 | 0.86947394 | 0.87130709 | 0.87252066 |
| North Tyneside         | 0.7576565  | 0.76226785 | 0.76571699 | 0.76863378 | 0.77204743 | 0.77565546 | 0.77932008 | 0.78246448  | 0.7849722  | 0.78743786 | 0.79083703 | 0.79534112 | 0.80150615 | 0.80820964 | 0.81616165 | 0.82009684  | 0.82406908 | 0.82804409 | 0.83229832 | 0.83483349 | 0.83640086 | 0.83790011 |
| Northumberland         | 0.754331   | 0.7583374  | 0.76108912 | 0.76318611 | 0.76580619 | 0.76865151 | 0.77141402 | 0.77387572  | 0.77632744 | 0.77878207 | 0.78077744 | 0.78431666 | 0.78967859 | 0.79558811 | 0.79934004 | 0.80313107  | 0.80667701 | 0.81069097 | 0.8144867  | 0.81809246 | 0.82177669 | 0.82331701 |
| Redcar and Cleveland   | 0.72723266 | 0.73125509 | 0.73339543 | 0.73446566 | 0.736414   | 0.73919644 | 0.74231865 | 0.74511908  | 0.74720774 | 0.7486004  | 0.75059426 | 0.75444991 | 0.76139509 | 0.76923245 | 0.77451559 | 0.77727825  | 0.78075988 | 0.78427063 | 0.78810445 | 0.79310696 | 0.79644544 | 0.79836962 |
| South Tyneside         | 0.72199177 | 0.72691563 | 0.73052272 | 0.73358975 | 0.73708044 | 0.74023518 | 0.74276091 | 0.74551789  | 0.7484208  | 0.75083025 | 0.75371171 | 0.75781144 | 0.76391028 | 0.77075899 | 0.77581579 | 0.77984432  | 0.78380594 | 0.78798301 | 0.79201587 | 0.79652902 | 0.79932541 | 0.80107303 |
| Stockton-on-Tees       | 0.76591902 | 0.76933421 | 0.77137674 | 0.77284083 | 0.77461364 | 0.77620877 | 0.77816682 | 0.78018326  | 0.78180059 | 0.78396922 | 0.78735343 | 0.79176717 | 0.79783644 | 0.80411822 | 0.80850829 | 0.81170065  | 0.8149351  | 0.81842686 | 0.82187762 | 0.8263084  | 0.82931055 | 0.8309489  |
| Sunderland             | 0.74535827 | 0.74979071 | 0.75329407 | 0.75609381 | 0.75904144 | 0.76134892 | 0.76372052 | 0.76661445  | 0.76961527 | 0.77241229 | 0.77550064 | 0.77947828 | 0.78497747 | 0.7907802  | 0.79506434 | 0.79839481  | 0.80167355 | 0.80548224 | 0.80953583 | 0.81426814 | 0.81730961 | 0.81916413 |
| North West England     | 0.7718241  | 0.77664303 | 0.77984929 | 0.78202154 | 0.7846043  | 0.78724829 | 0.78980914 | 0.79258226  | 0.79540342 | 0.79826012 | 0.80162241 | 0.8055136  | 0.81076052 | 0.81647096 | 0.82008593 | 0.82440582  | 0.82800597 | 0.83195251 | 0.83582963 | 0.84018255 | 0.8424278  | 0.8444382  |
| Blackburn with Darwen  | 0.7238112  | 0.72831272 | 0.73147637 | 0.73371769 | 0.7364082  | 0.73904631 | 0.74185751 | 0.74468179  | 0.74684093 | 0.74945207 | 0.75378134 | 0.75912251 | 0.76671182 | 0.77546956 | 0.78201727 | 0.78691731  | 0.79123695 | 0.79548674 | 0.8000974  | 0.80572532 | 0.80942581 | 0.81150374 |
| Blackpool              | 0.71846253 | 0.7224849  | 0.7237447  | 0.72340302 | 0.72460302 | 0.72670251 | 0.72885299 | 0.73089832  | 0.73281453 | 0.73507899 | 0.73802993 | 0.74142686 | 0.74684695 | 0.75326273 | 0.75816527 | 0.76236711  | 0.76695876 | 0.7723135  | 0.77759512 | 0.78355735 | 0.78755858 | 0.78992589 |
| Bolton                 | 0.74433186 | 0.74837426 | 0.75101369 | 0.75247887 | 0.75429027 | 0.7560104  | 0.75773083 | 0.75934402  | 0.76056701 | 0.76243379 | 0.76605381 | 0.77079774 | 0.7736255  | 0.78433931 | 0.78911719 | 0.79270227  | 0.79629417 | 0.80056448 | 0.80471298 | 0.80930634 | 0.81234076 | 0.81417076 |
| Bury                   | 0.71648501 | 0.71653895 | 0.7165506  | 0.7165906  | 0.7166306  | 0.7166706  | 0.7167106  | 0.7167506   | 0.7167906  | 0.7168306  | 0.7168706  | 0.7169106  | 0.7169506  | 0.7170306  | 0.7171106  | 0.7171906   | 0.7172706  | 0.7173506  | 0.7174306  | 0.7175106  | 0.7175906  | 0.7176706  |
| Cheshire East          | 0.81418307 | 0.81855068 | 0.82158338 | 0.82352578 | 0.82563833 | 0.82778333 | 0.82983807 | 0.83213362  |            |            |            |            |            |            |            |             |            |            |            |            |            |            |

|                              |            |            |             |            |             |            |             |            |            |            |            |            |            |            |            |             |             |            |            |            |            |            |
|------------------------------|------------|------------|-------------|------------|-------------|------------|-------------|------------|------------|------------|------------|------------|------------|------------|------------|-------------|-------------|------------|------------|------------|------------|------------|
| Kent                         | 0.78031289 | 0.7844356  | 0.78744966  | 0.78971606 | 0.79214864  | 0.79413323 | 0.79595689  | 0.7979821  | 0.79995811 | 0.80200709 | 0.80478083 | 0.80819853 | 0.81286395 | 0.8179832  | 0.82194814 | 0.82530204  | 0.8287368   | 0.83266675 | 0.83663029 | 0.84102153 | 0.84372411 | 0.84534539 |
| Medway                       | 0.75510823 | 0.75877207 | 0.76162445  | 0.76420479 | 0.76713692  | 0.76942453 | 0.77118967  | 0.77297525 | 0.77468399 | 0.776228   | 0.77942113 | 0.78273483 | 0.78741044 | 0.79255667 | 0.79636819 | 0.79958832  | 0.8030539   | 0.8073482  | 0.81167293 | 0.81618517 | 0.81893955 | 0.82066784 |
| Milton Keynes                | 0.8150882  | 0.81897369 | 0.8218732   | 0.82421027 | 0.82689155  | 0.8289722  | 0.83033809  | 0.83142131 | 0.83226545 | 0.83339458 | 0.8347402  | 0.8381144  | 0.84445555 | 0.85141317 | 0.85757335 | 0.86320655  | 0.86875047  | 0.87415256 | 0.87832676 | 0.88221577 | 0.88530394 | 0.88717934 |
| Oxfordshire                  | 0.8383575  | 0.8427164  | 0.84599586  | 0.84859294 | 0.8511909   | 0.8535381  | 0.8566033   | 0.8580485  | 0.86054188 | 0.8622321  | 0.8649828  | 0.86764895 | 0.87109535 | 0.87512378 | 0.87863579 | 0.88218828  | 0.88591533  | 0.88959397 | 0.89279149 | 0.89632717 | 0.89831888 | 0.89947593 |
| Portsmouth                   | 0.8076178  | 0.81199062 | 0.81542911  | 0.81822759 | 0.82090657  | 0.8232272  | 0.82542509  | 0.82805508 | 0.83115236 | 0.83416247 | 0.83671976 | 0.83909559 | 0.84233073 | 0.84606216 | 0.84911677 | 0.852179364 | 0.8544725   | 0.8573527  | 0.86001186 | 0.86292961 | 0.86464742 | 0.86587593 |
| Reading                      | 0.85293744 | 0.85784299 | 0.8618166   | 0.8658083  | 0.86823015  | 0.87057453 | 0.87185217  | 0.87366865 | 0.87611377 | 0.87829223 | 0.87904761 | 0.87957825 | 0.88140175 | 0.88456014 | 0.88765942 | 0.89049271  | 0.89330058  | 0.89621678 | 0.89897063 | 0.90190157 | 0.90431908 | 0.90587359 |
| Slough                       | 0.81900265 | 0.8214746  | 0.82330758  | 0.82451084 | 0.8257586   | 0.82621675 | 0.828598375 | 0.82585896 | 0.82615659 | 0.82804461 | 0.83135486 | 0.83583971 | 0.84213206 | 0.84874124 | 0.85385353 | 0.85803702  | 0.86202653  | 0.86594187 | 0.86947605 | 0.87328253 | 0.8765373  | 0.87855725 |
| Southampton                  | 0.81015023 | 0.81475129 | 0.81851083  | 0.82164415 | 0.82455951  | 0.82693701 | 0.82906617  | 0.83136861 | 0.83384975 | 0.83565154 | 0.83688952 | 0.83828507 | 0.84058256 | 0.84330949 | 0.84534903 | 0.84725151  | 0.84961047  | 0.85243428 | 0.85517765 | 0.85828484 | 0.86010019 | 0.86134908 |
| Surrey                       | 0.84950138 | 0.85398569 | 0.85728936  | 0.85994151 | 0.8624662   | 0.86445316 | 0.86607386  | 0.86788482 | 0.86970367 | 0.87132598 | 0.8732674  | 0.87548292 | 0.87877828 | 0.88260538 | 0.88588635 | 0.88904663  | 0.89228143  | 0.89553774 | 0.89874817 | 0.9020841  | 0.90382965 | 0.9048594  |
| West Berkshire               | 0.84681987 | 0.85087726 | 0.85347602  | 0.85414895 | 0.85477897  | 0.85482124 | 0.85439969  | 0.85404108 | 0.85425028 | 0.85578691 | 0.85834418 | 0.86188037 | 0.86685645 | 0.87226468 | 0.87666497 | 0.88025107  | 0.88359419  | 0.88702536 | 0.89021858 | 0.89345061 | 0.89608614 | 0.89775701 |
| West Sussex                  | 0.80303899 | 0.80277905 | 0.801031956 | 0.81248303 | 0.81496096  | 0.81707191 | 0.81883466  | 0.82058725 | 0.82211726 | 0.82358414 | 0.82590089 | 0.82901353 | 0.83347447 | 0.83661543 | 0.84291021 | 0.84659433  | 0.8501431   | 0.85380912 | 0.85733381 | 0.86114164 | 0.86339007 | 0.86479215 |
| Windsor and Maidenhead       | 0.85526134 | 0.85945754 | 0.86298159  | 0.8660002  | 0.86886598  | 0.87111798 | 0.87301075  | 0.87488871 | 0.87664683 | 0.87802149 | 0.87989865 | 0.88232926 | 0.88603994 | 0.89085791 | 0.89511708 | 0.89881061  | 0.90235087  | 0.9059027  | 0.90929175 | 0.91284889 | 0.91473804 | 0.91581805 |
| Wokingham                    | 0.86302508 | 0.86710861 | 0.8704076   | 0.87311457 | 0.87589429  | 0.87834707 | 0.88028486  | 0.88213974 | 0.88400636 | 0.88525218 | 0.88610988 | 0.88727031 | 0.88997221 | 0.8936353  | 0.89665973 | 0.89922274  | 0.90171339  | 0.90424761 | 0.90651357 | 0.90918875 | 0.91072748 | 0.91165875 |
| South West England           | 0.79343697 | 0.79786834 | 0.80104634  | 0.80368179 | 0.80652576  | 0.80900425 | 0.8111514   | 0.81334646 | 0.81562301 | 0.81778662 | 0.82044909 | 0.82367897 | 0.82820951 | 0.83331304 | 0.83751707 | 0.84135107  | 0.84523107  | 0.84936662 | 0.85337481 | 0.85759435 | 0.86009088 | 0.86146702 |
| Bath and North East Somerset | 0.83075085 | 0.83584502 | 0.84050575  | 0.84482246 | 0.8487305   | 0.85221763 | 0.85568001  | 0.85938525 | 0.86296555 | 0.86655203 | 0.87001823 | 0.87347447 | 0.87752504 | 0.8828145  | 0.88904409 | 0.89452326  | 0.89934563  | 0.90314581 | 0.90692947 | 0.90936994 | 0.91084508 | 0.91165875 |
| Bournemouth                  | 0.8048075  | 0.81011008 | 0.8145398   | 0.81852419 | 0.82241845  | 0.82640447 | 0.82841321  | 0.8313547  | 0.83434427 | 0.83682931 | 0.83898966 | 0.84123649 | 0.84459133 | 0.8461968  | 0.85211305 | 0.85519666  | 0.85822726  | 0.86143265 | 0.86447808 | 0.86761169 | 0.86931921 | 0.87046477 |
| Bristol, City of             | 0.83222633 | 0.83680894 | 0.8398284   | 0.84242176 | 0.84513932  | 0.8478601  | 0.8506721   | 0.85393064 | 0.85767376 | 0.86085072 | 0.86339527 | 0.8658109  | 0.86912093 | 0.87306373 | 0.87672518 | 0.88024725  | 0.88375121  | 0.8873875  | 0.89072045 | 0.89406699 | 0.89587235 | 0.89704187 |
| Cornwall                     | 0.76994659 | 0.77429251 | 0.77761354  | 0.78045262 | 0.78339497  | 0.78573839 | 0.78780296  | 0.78975369 | 0.79148465 | 0.79322605 | 0.7954772  | 0.79843508 | 0.8032577  | 0.80902662 | 0.81370439 | 0.81776453  | 0.82192046  | 0.82638101 | 0.83073446 | 0.83539397 | 0.8381743  | 0.83976556 |
| Devon                        | 0.7877467  | 0.79235657 | 0.79589158  | 0.79892481 | 0.8022409   | 0.80541911 | 0.80820232  | 0.81077568 | 0.81318568 | 0.81530465 | 0.81780667 | 0.8208979  | 0.82539621 | 0.83043518 | 0.83424279 | 0.83778135  | 0.840809371 | 0.84426645 | 0.8477182  | 0.85162009 | 0.85396499 | 0.8553761  |
| Dorset                       | 0.7835336  | 0.78734836 | 0.79016348  | 0.79235565 | 0.79467044  | 0.79649652 | 0.79779012  | 0.79882781 | 0.79984405 | 0.80141766 | 0.8044968  | 0.808423   | 0.81357242 | 0.81921679 | 0.82387957 | 0.82816077  | 0.83261981  | 0.83748523 | 0.84228551 | 0.84711044 | 0.84993704 | 0.85161514 |
| Gloucestershire              | 0.80408717 | 0.80862767 | 0.81196667  | 0.8150688  | 0.81841569  | 0.82094651 | 0.82260538  | 0.8241468  | 0.82582094 | 0.82759457 | 0.83066038 | 0.8347906  | 0.83915456 | 0.84429117 | 0.8489362  | 0.8526156   | 0.85648445  | 0.86041398 | 0.86417148 | 0.86810169 | 0.87037831 | 0.8718063  |
| North Somerset               | 0.78395343 | 0.78812337 | 0.79137133  | 0.79407923 | 0.79690982  | 0.79935442 | 0.8012024   | 0.80330976 | 0.80574388 | 0.80823865 | 0.81152651 | 0.81562505 | 0.82109059 | 0.82696856 | 0.83172396 | 0.83630364  | 0.84056734  | 0.84527116 | 0.85013781 | 0.85473285 | 0.85742559 | 0.85901767 |
| Plymouth                     | 0.87020717 | 0.87421343 | 0.87820446  | 0.88219526 | 0.88618617  | 0.89017698 | 0.8941678   | 0.89815868 | 0.90214949 | 0.9061403  | 0.91013115 | 0.914122   | 0.91811296 | 0.92210377 | 0.92609458 | 0.93008539  | 0.9340762   | 0.93806701 | 0.94205782 | 0.94604863 | 0.95003944 | 0.95403025 |
| Poole                        | 0.79869131 | 0.80269517 | 0.80521256  | 0.80721052 | 0.80983995  | 0.81231308 | 0.81401556  | 0.81550983 | 0.81678664 | 0.81801996 | 0.82049631 | 0.82436683 | 0.82958154 | 0.83599646 | 0.8408079  | 0.8448      | 0.84868368  | 0.85248023 | 0.85598662 | 0.859739   | 0.86203606 | 0.86349431 |
| Somerset                     | 0.77303053 | 0.77698019 | 0.77940974  | 0.78148555 | 0.78400478  | 0.78625955 | 0.78807283  | 0.78949123 | 0.79055235 | 0.79190708 | 0.79472084 | 0.79865464 | 0.8038229  | 0.80964748 | 0.81434725 | 0.81878724  | 0.82340688  | 0.82842183 | 0.83335523 | 0.83846511 | 0.84356552 | 0.84840431 |
| South Gloucestershire        | 0.81687563 | 0.82137588 | 0.82449811  | 0.82722374 | 0.83025257  | 0.83360202 | 0.83660384  | 0.83866626 | 0.84133347 | 0.84359673 | 0.84584925 | 0.84861734 | 0.85315551 | 0.85859109 | 0.86302103 | 0.86698968  | 0.87148754  | 0.87593267 | 0.88130736 | 0.88536038 | 0.88949874 | 0.89364702 |
| Swindon                      | 0.80526529 | 0.80913587 | 0.81160586  | 0.81487751 | 0.818593085 | 0.82164947 | 0.82513166  | 0.82818529 | 0.83200205 | 0.83294159 | 0.8271647  | 0.8329984  | 0.8340154  | 0.84689113 | 0.85066236 | 0.85479626  | 0.85934159  | 0.86439149 | 0.86905834 | 0.87459591 | 0.88010388 | 0.88561185 |
| Torbay                       | 0.7503851  | 0.75338146 | 0.75438811  | 0.754903   | 0.75646469  | 0.75815326 | 0.75962425  | 0.76116012 | 0.76302188 | 0.76447452 | 0.76640881 | 0.76847408 | 0.7725493  | 0.77785163 | 0.78236604 | 0.78669091  | 0.79130529  | 0.79652416 | 0.80181322 | 0.80739957 | 0.8109517  | 0.81303848 |
| Wiltshire                    | 0.79261431 | 0.79672143 | 0.79985959  | 0.80197267 | 0.8047506   | 0.80677253 | 0.80879798  | 0.80848882 | 0.80853481 | 0.80925605 | 0.81188872 | 0.81586941 | 0.8213935  | 0.82725146 | 0.83199469 | 0.83652255  | 0.84123202  | 0.84609662 | 0.85059802 | 0.85515896 | 0.85786894 | 0.85946624 |
| West Midlands                | 0.75940199 | 0.76419493 | 0.76739212  | 0.76990253 | 0.77296591  | 0.77602218 | 0.77876534  | 0.78158843 | 0.78460552 | 0.78762594 | 0.79093321 | 0.79473515 | 0.80022585 | 0.80627967 | 0.81090038 | 0.81466979  | 0.81833681  | 0.82245982 | 0.82656535 | 0.83119289 | 0.8341226  | 0.83586514 |
| Birmingham                   | 0.75847432 | 0.76318415 | 0.7664411   | 0.76927166 | 0.77298803  | 0.7766293  | 0.77985239  | 0.7833913  | 0.78761596 | 0.79191728 | 0.79568782 | 0.79949509 | 0.80504462 | 0.81099026 | 0.81533317 | 0.81856957  | 0.82169385  | 0.82547098 | 0.82928301 | 0.83360171 | 0.8363727  | 0.8380669  |
| Coventry                     | 0.78134072 | 0.78585288 | 0.7890003   | 0.79146355 | 0.79441863  | 0.79685247 | 0.79863054  | 0.80071697 | 0.80326202 | 0.80689408 | 0.81012859 | 0.81365593 | 0.81832839 | 0.8231046  | 0.82647426 | 0.82985796  | 0.8332547   | 0.83682862 | 0.84027758 | 0.84403573 | 0.846954   | 0.84861807 |
| Dudley                       | 0.73979363 | 0.74427842 | 0.74729128  | 0.74936771 | 0.75125197  | 0.75396139 | 0.75620269  | 0.7580014  | 0.75919646 | 0.76011798 | 0.76160445 | 0.76384667 | 0.7688098  | 0.77512026 | 0.77979086 | 0.78316793  | 0.78637034  | 0.79003813 | 0.79458623 | 0.79924052 | 0.80229133 | 0.80416452 |
| Herefordshire, County of     | 0.77159358 | 0.77626011 | 0.77935754  | 0.78182235 | 0.78456624  | 0.78703024 | 0.78902465  | 0.79093782 | 0.792409   | 0.79360618 | 0.79585412 | 0.79905394 | 0.804075   | 0.81024118 | 0.81570086 | 0.82067088  | 0.82570314  | 0.83106166 | 0.83617974 | 0.84137324 | 0.84451711 | 0.84631047 |
| Sandwell                     | 0.71857945 | 0.72283216 | 0.72545606  | 0.72756204 | 0.73041819  | 0.733331   | 0.73538172  | 0.73642892 | 0.73729446 | 0.73898715 | 0.7418434  | 0.74609279 | 0.75330892 | 0.76150626 | 0.76752487 | 0.77225644  | 0.7764958   | 0.78066015 | 0.78485671 | 0.78995172 | 0.79527427 | 0.79572236 |
| Shropshire                   | 0.77301822 | 0.77746284 | 0.78066583  | 0.78392162 | 0.78757885  | 0.79078434 | 0.79328886  | 0.79522814 | 0.79665556 | 0.79833618 | 0.80141039 | 0.80520777 | 0.81027226 | 0.81576026 | 0.81969129 | 0.82297794  | 0.82652759  | 0.83065305 | 0.83468107 | 0.83906667 | 0.84368606 | 0.84321873 |
| Stafford                     | 0.80360557 | 0.80827892 | 0.81137497  | 0.81380002 | 0.81646701  | 0.81882621 | 0.82106282  | 0.823433   |            |            |            |            |            |            |            |             |             |            |            |            |            |            |

|                                  |            |            |            |            |            |            |             |            |            |            |            |            |            |            |             |             |             |            |            |             |            |             |
|----------------------------------|------------|------------|------------|------------|------------|------------|-------------|------------|------------|------------|------------|------------|------------|------------|-------------|-------------|-------------|------------|------------|-------------|------------|-------------|
| Wales                            | 0.76099681 | 0.76584341 | 0.76943011 | 0.77209612 | 0.77506018 | 0.7777931  | 0.78019275  | 0.78269139 | 0.78514879 | 0.78762431 | 0.79065666 | 0.79419495 | 0.79911822 | 0.80492191 | 0.809441694 | 0.813515138 | 0.81681818  | 0.8205084  | 0.82461706 | 0.8297892   | 0.8327143  | 0.83427854  |
| Latin America and Caribbean      | 0.54272237 | 0.54788854 | 0.55297248 | 0.5578192  | 0.56284923 | 0.56790262 | 0.57305602  | 0.57835546 | 0.58376018 | 0.58847432 | 0.59355666 | 0.5990377  | 0.60455091 | 0.61016338 | 0.61554288  | 0.62047013  | 0.62510555  | 0.62980657 | 0.63453797 | 0.63917311  | 0.64392853 | 0.64654128  |
| Andean Latin America             | 0.53756051 | 0.54257235 | 0.54791107 | 0.55310898 | 0.55823544 | 0.56309152 | 0.5679874   | 0.57299897 | 0.57856419 | 0.58399894 | 0.59020118 | 0.59694462 | 0.60383923 | 0.61070517 | 0.61705999  | 0.62276075  | 0.62816126  | 0.6335379  | 0.6386016  | 0.64392132  | 0.64780682 | 0.65160246  |
| Bolivia                          | 0.4863279  | 0.4920307  | 0.49734884 | 0.5023658  | 0.50727304 | 0.51216649 | 0.51714619  | 0.52194613 | 0.52694375 | 0.53179244 | 0.53709007 | 0.54268874 | 0.54861548 | 0.55478822 | 0.56093458  | 0.56700909  | 0.57291218  | 0.57885141 | 0.58492004 | 0.59085444  | 0.59691088 | 0.5991082   |
| Ecuador                          | 0.54304478 | 0.54855215 | 0.55489733 | 0.56095958 | 0.56629029 | 0.56992734 | 0.57251627  | 0.5747047  | 0.57812504 | 0.58248426 | 0.58876306 | 0.59629208 | 0.60545432 | 0.61408027 | 0.62220743  | 0.62854671  | 0.63428114  | 0.64001122 | 0.64588852 | 0.65178799  | 0.65671446 | 0.66101705  |
| Peru                             | 0.5489522  | 0.55377545 | 0.55885326 | 0.56387107 | 0.56906302 | 0.574517   | 0.58050336  | 0.58695849 | 0.59375081 | 0.59995499 | 0.60652093 | 0.61305122 | 0.61935526 | 0.62551902 | 0.6311435   | 0.63627827  | 0.64128528  | 0.64618085 | 0.65097732 | 0.65543373  | 0.65867224 | 0.66205404  |
| Caribbean                        | 0.55736894 | 0.56311049 | 0.56906859 | 0.57488862 | 0.58053331 | 0.58575799 | 0.59060234  | 0.59470961 | 0.59829691 | 0.60165483 | 0.60548008 | 0.60952505 | 0.61325472 | 0.61687685 | 0.62044265  | 0.62407467  | 0.62758207  | 0.63078807 | 0.63397217 | 0.63732123  | 0.63970853 | 0.64200305  |
| Antigua and Barbuda              | 0.66081906 | 0.66562063 | 0.6703608  | 0.67531149 | 0.68041243 | 0.68548644 | 0.69082602  | 0.69636004 | 0.70217536 | 0.70712856 | 0.71143225 | 0.71548999 | 0.71950932 | 0.72286498 | 0.72558598  | 0.72832726  | 0.73159894  | 0.73496371 | 0.73887911 | 0.74305296  | 0.74654533 | 0.74988689  |
| The Bahamas                      | 0.74251795 | 0.74359288 | 0.74625032 | 0.74991671 | 0.75375964 | 0.75678266 | 0.75918594  | 0.761991   | 0.76595905 | 0.76956167 | 0.77411981 | 0.77828189 | 0.78183864 | 0.78462391 | 0.78972549  | 0.78995615  | 0.7927387   | 0.79534718 | 0.79817903 | 0.80103307  | 0.80294802 | 0.80502067  |
| Barbados                         | 0.6813042  | 0.68332939 | 0.68780758 | 0.69323596 | 0.6980297  | 0.70151005 | 0.70385619  | 0.70587165 | 0.7085415  | 0.71214336 | 0.71620855 | 0.72006609 | 0.72416246 | 0.72782617 | 0.73038329  | 0.73260299  | 0.73491253  | 0.73715726 | 0.73951444 | 0.74223931  | 0.74436665 | 0.74674876  |
| Belize                           | 0.49864373 | 0.50223943 | 0.50687166 | 0.51267946 | 0.51969733 | 0.52723106 | 0.53488962  | 0.54190069 | 0.54809232 | 0.55346587 | 0.55854689 | 0.56344036 | 0.56845624 | 0.57323646 | 0.57809133  | 0.58327909  | 0.58827591  | 0.59333729 | 0.59851201 | 0.6033516   | 0.60760065 | 0.610229    |
| Bermuda                          | 0.7359965  | 0.74191891 | 0.7475445  | 0.75330516 | 0.75900888 | 0.7646909  | 0.77059677  | 0.77611426 | 0.78035833 | 0.78475911 | 0.78918147 | 0.79338052 | 0.79748487 | 0.8013882  | 0.80492341  | 0.80799879  | 0.81055084  | 0.81280723 | 0.8148928  | 0.81700034  | 0.81920342 | 0.82136542  |
| Cuba                             | 0.5666769  | 0.57275386 | 0.57996829 | 0.58764776 | 0.59434872 | 0.5998638  | 0.60497057  | 0.6076181  | 0.60940902 | 0.61177564 | 0.61526126 | 0.62038669 | 0.62615602 | 0.6318398  | 0.63730413  | 0.64281896  | 0.64790787  | 0.65230929 | 0.65685865 | 0.66167472  | 0.66521075 | 0.66872686  |
| Dominica                         | 0.65483904 | 0.65236857 | 0.65842355 | 0.66367887 | 0.66895213 | 0.67454908 | 0.68034248  | 0.68541592 | 0.69019752 | 0.69446187 | 0.69849819 | 0.70246326 | 0.70687061 | 0.71221048 | 0.71845556  | 0.72478554  | 0.73176054  | 0.73662427 | 0.73993591 | 0.74213207  | 0.74441994 | 0.74696718  |
| Dominican Republic               | 0.49546859 | 0.50275242 | 0.51029802 | 0.51739557 | 0.52454327 | 0.53222865 | 0.54022269  | 0.54818702 | 0.55537131 | 0.56178375 | 0.56813058 | 0.57383481 | 0.57986638 | 0.58362583 | 0.58826374  | 0.59292416  | 0.59761961  | 0.60214029 | 0.60696084 | 0.61191302  | 0.61563563 | 0.61933882  |
| Grenada                          | 0.5383812  | 0.54905897 | 0.55947313 | 0.56971804 | 0.57848746 | 0.58715888 | 0.59405452  | 0.60076634 | 0.60687928 | 0.61180526 | 0.616487   | 0.62097852 | 0.62497751 | 0.62904834 | 0.6337347   | 0.63893608  | 0.64433523  | 0.64983152 | 0.65537277 | 0.66080851  | 0.66580635 | 0.66899303  |
| Guyana                           | 0.52869399 | 0.53486981 | 0.54051427 | 0.54551647 | 0.55032637 | 0.55484848 | 0.55946561  | 0.56454114 | 0.56959521 | 0.57476993 | 0.58008391 | 0.58568827 | 0.59133658 | 0.59682629 | 0.60213651  | 0.60760549  | 0.613191436 | 0.62060261 | 0.62716704 | 0.63364035  | 0.64228464 | 0.65081234  |
| Haiti                            | 0.36257221 | 0.36866431 | 0.37447332 | 0.38006725 | 0.38506151 | 0.38984542 | 0.394322    | 0.39897344 | 0.40328587 | 0.40794442 | 0.41184011 | 0.41617719 | 0.42002153 | 0.42398555 | 0.4279409   | 0.43175676  | 0.43528872  | 0.438541   | 0.44167893 | 0.44432885  | 0.44639061 | 0.44827828  |
| Jamaica                          | 0.59459292 | 0.60019022 | 0.60559175 | 0.61087742 | 0.61583628 | 0.62040066 | 0.62501886  | 0.62954947 | 0.63396785 | 0.63811084 | 0.64212939 | 0.64639583 | 0.65058376 | 0.65457362 | 0.65850534  | 0.66246581  | 0.66646928  | 0.67029105 | 0.67407531 | 0.67777854  | 0.68056718 | 0.68326306  |
| Puerto Rico                      | 0.71003565 | 0.71895586 | 0.72595686 | 0.73047514 | 0.73421955 | 0.73774227 | 0.74162943  | 0.74588381 | 0.75029127 | 0.75636169 | 0.76176325 | 0.76678488 | 0.7723118  | 0.77846116 | 0.78512034  | 0.79180017  | 0.79908408  | 0.80664896 | 0.81290607 | 0.81884319  | 0.82291844 | 0.82552585  |
| Saint Kitts and Nevis            | 0.64433338 | 0.64922665 | 0.65493491 | 0.65992531 | 0.66756813 | 0.67914546 | 0.69007867  | 0.69772763 | 0.70414449 | 0.7094995  | 0.71464042 | 0.71932438 | 0.72343615 | 0.72760659 | 0.72933022  | 0.73222607  | 0.73565614  | 0.73947068 | 0.74373666 | 0.74815207  | 0.75156841 | 0.75498705  |
| Saint Lucia                      | 0.5797889  | 0.58508756 | 0.59016758 | 0.59567515 | 0.60162548 | 0.60723987 | 0.6127553   | 0.61799471 | 0.623273   | 0.62816985 | 0.6327829  | 0.63743944 | 0.64156713 | 0.64515308 | 0.64874351  | 0.65231548  | 0.65585334  | 0.65934135 | 0.66308668 | 0.66684036  | 0.66972049 | 0.672520974 |
| Saint Vincent and the Grenadines | 0.53317329 | 0.53945571 | 0.54606362 | 0.55269372 | 0.55866354 | 0.56535812 | 0.56822175  | 0.57281905 | 0.57761114 | 0.58254911 | 0.58719038 | 0.5902591  | 0.59215391 | 0.59461407 | 0.59837867  | 0.60375413  | 0.61005921  | 0.61643847 | 0.62263494 | 0.62832599  | 0.63286609 | 0.63719596  |
| Suriname                         | 0.54366002 | 0.54868352 | 0.55387943 | 0.55941837 | 0.56510971 | 0.57046219 | 0.57564705  | 0.58065457 | 0.58564483 | 0.59051288 | 0.59549765 | 0.60035634 | 0.60474187 | 0.60891061 | 0.61270442  | 0.61699732  | 0.61886609  | 0.62168418 | 0.62470801 | 0.62789678  | 0.63068371 | 0.63366574  |
| Trinidad and Tobago              | 0.67668384 | 0.68267649 | 0.68887227 | 0.69528234 | 0.70261081 | 0.70852098 | 0.71460021  | 0.72019642 | 0.7257207  | 0.72953889 | 0.73323708 | 0.73680024 | 0.73999907 | 0.74359396 | 0.74733896  | 0.75151068  | 0.75493535  | 0.75822699 | 0.76124199 | 0.7641696   | 0.76642208 | 0.76876325  |
| Virgin Islands                   | 0.70843656 | 0.71375111 | 0.72309827 | 0.73460985 | 0.74461316 | 0.75426756 | 0.76344575  | 0.77218059 | 0.78034262 | 0.78705515 | 0.7932197  | 0.7980717  | 0.80109285 | 0.80340579 | 0.80564138  | 0.80788925  | 0.81010994  | 0.81240517 | 0.81482544 | 0.81742901  | 0.81960171 | 0.821833085 |
| Central Latin America            | 0.53730037 | 0.54243984 | 0.54713435 | 0.5514461  | 0.5560115  | 0.56074953 | 0.56564869  | 0.57070727 | 0.57583933 | 0.57994066 | 0.58425317 | 0.58930755 | 0.59482717 | 0.60037102 | 0.60605929  | 0.61181533  | 0.61768069  | 0.62344243 | 0.62927464 | 0.635284707 | 0.6399589  | 0.6406851   |
| Colombia                         | 0.52783909 | 0.5330765  | 0.53818934 | 0.54326513 | 0.54860183 | 0.55408919 | 0.56018273  | 0.56682264 | 0.57349465 | 0.57987467 | 0.58640811 | 0.59334048 | 0.60025424 | 0.60725064 | 0.61415192  | 0.62088923  | 0.6275545   | 0.63413036 | 0.64025507 | 0.64603885  | 0.65085835 | 0.65544291  |
| Costa Rica                       | 0.58824319 | 0.59488911 | 0.60089443 | 0.60576569 | 0.6103157  | 0.61441262 | 0.618785016 | 0.62120057 | 0.62570391 | 0.63129138 | 0.63659543 | 0.6412013  | 0.64657409 | 0.65194581 | 0.65689046  | 0.66203014  | 0.66743009  | 0.67321399 | 0.68129615 | 0.69004909  | 0.69619461 | 0.7003480   |
| El Salvador                      | 0.44396267 | 0.4517766  | 0.46296886 | 0.47039741 | 0.47653666 | 0.48204172 | 0.486826    | 0.49080975 | 0.49507774 | 0.49948971 | 0.50417134 | 0.50896924 | 0.51339687 | 0.51812191 | 0.5234689   | 0.529338695 | 0.53565027  | 0.54199896 | 0.54814317 | 0.55403165  | 0.55891989 | 0.56377519  |
| Guatemala                        | 0.3798773  | 0.38697269 | 0.39689964 | 0.40823416 | 0.41977706 | 0.43032753 | 0.43885638  | 0.44724596 | 0.45654187 | 0.46400308 | 0.47047736 | 0.47699098 | 0.48186285 | 0.48728669 | 0.49402719  | 0.50056561  | 0.50714979  | 0.51373568 | 0.52099547 | 0.52863047  | 0.53547141 | 0.53997242  |
| Honduras                         | 0.38798805 | 0.39417401 | 0.4003718  | 0.40666838 | 0.41306182 | 0.41961233 | 0.426353    | 0.43324031 | 0.43998116 | 0.44615105 | 0.45238223 | 0.45870033 | 0.46492515 | 0.47076683 | 0.4768578   | 0.48229418  | 0.48770593  | 0.49313069 | 0.49865723 | 0.50415651  | 0.50866925 | 0.51303725  |
| Mexico                           | 0.55953255 | 0.56477418 | 0.57011353 | 0.57569821 | 0.58094948 | 0.58522408 | 0.58854323  | 0.59144741 | 0.59445456 | 0.59668436 | 0.59952703 | 0.6036461  | 0.60891429 | 0.61508999 | 0.6218574   | 0.62889672  | 0.63592535  | 0.6426672  | 0.64905332 | 0.65590534  | 0.66011906 | 0.6645753   |
| Agascalientes                    | 0.57602722 | 0.58238199 | 0.5889208  | 0.59528251 | 0.60098395 | 0.6052851  | 0.60866303  | 0.61151629 | 0.61424432 | 0.61621885 | 0.61901915 | 0.62293883 | 0.62772639 | 0.63339809 | 0.63976965  | 0.64638692  | 0.65292446  | 0.65932105 | 0.66550502 | 0.67148323  | 0.67656188 | 0.68115928  |
| Baja California                  | 0.59933828 | 0.60536455 | 0.61185852 | 0.61819065 | 0.6233876  | 0.62712069 | 0.6298734   | 0.6322404  | 0.63481885 | 0.63658599 | 0.63888763 | 0.64266689 | 0.64772087 | 0.65351265 | 0.65971276  | 0.66640432  | 0.67356449  | 0.68055944 | 0.68732717 | 0.69378679  | 0.69923592 | 0.70408197  |
| Baja California Sur              | 0.59584449 | 0.60066456 | 0.60486462 | 0.61048615 | 0.61622124 | 0.62130964 | 0.62487862  | 0.62826975 | 0.6318338  | 0.63507846 | 0.63924246 | 0.64427575 | 0.65111728 | 0.65803001 | 0.66517874  | 0.67275445  | 0.68022975  | 0.68732015 | 0.6939065  | 0.70068439  | 0.70516978 | 0.70969428  |
| Campeche                         | 0.54081983 | 0.54760025 | 0.55399832 | 0.56010839 | 0.56568472 | 0.57       |             |            |            |            |            |            |            |            |             |             |             |            |            |             |            |             |

|                                 |            |            |            |            |            |            |            |            |            |            |            |            |            |            |            |             |            |            |            |             |            |            |
|---------------------------------|------------|------------|------------|------------|------------|------------|------------|------------|------------|------------|------------|------------|------------|------------|------------|-------------|------------|------------|------------|-------------|------------|------------|
| Veracruz de Ignacio de la Llave | 0.5102218  | 0.51476074 | 0.51949377 | 0.52506646 | 0.53078548 | 0.53558773 | 0.53959946 | 0.54351481 | 0.54783322 | 0.55154502 | 0.55591504 | 0.56146529 | 0.56811892 | 0.5754009  | 0.58309252 | 0.59107518  | 0.59882257 | 0.60607728 | 0.61278797 | 0.61895227  | 0.62388476 | 0.62813696 |
| Yucatán                         | 0.53669085 | 0.54134438 | 0.54573208 | 0.55111079 | 0.55712125 | 0.56270542 | 0.56789218 | 0.57301505 | 0.57831159 | 0.58267134 | 0.58748250 | 0.59310568 | 0.59933071 | 0.60603672 | 0.61308507 | 0.62000859  | 0.62649344 | 0.63256604 | 0.63835718 | 0.64393674  | 0.64867162 | 0.65305081 |
| Zacatecas                       | 0.53671219 | 0.54257064 | 0.54849739 | 0.55423957 | 0.55947384 | 0.56431252 | 0.56656109 | 0.56944972 | 0.57257197 | 0.57447126 | 0.57658921 | 0.57995006 | 0.58436328 | 0.5897267  | 0.59565048 | 0.6019342   | 0.60826097 | 0.61430899 | 0.62003687 | 0.6255434   | 0.63033879 | 0.63477366 |
| Nicaragua                       | 0.41610836 | 0.42327064 | 0.43081375 | 0.43728415 | 0.44327451 | 0.44884744 | 0.45390505 | 0.4590428  | 0.46383774 | 0.46796184 | 0.47212172 | 0.47659347 | 0.48123699 | 0.48610547 | 0.49120735 | 0.49619166  | 0.50185334 | 0.50748202 | 0.51323823 | 0.519169705 | 0.52529267 | 0.53158473 |
| Panamá                          | 0.58737839 | 0.5945357  | 0.60013868 | 0.60404336 | 0.60687703 | 0.60949412 | 0.61224971 | 0.61528542 | 0.61895891 | 0.62240281 | 0.62511632 | 0.62863394 | 0.63242634 | 0.64132435 | 0.64910817 | 0.65796205  | 0.66727676 | 0.6767835  | 0.68671992 | 0.69667068  | 0.70378849 | 0.70886483 |
| Venezuela                       | 0.56350626 | 0.5645838  | 0.56260446 | 0.55521222 | 0.55097226 | 0.55394168 | 0.56333419 | 0.57536717 | 0.58618489 | 0.59328842 | 0.59912792 | 0.60482348 | 0.61018747 | 0.61444102 | 0.61468681 | 0.61067536  | 0.60699321 | 0.60516013 | 0.60406825 | 0.60231389  | 0.60003478 | 0.59651306 |
| Tropical Latin America          | 0.54171565 | 0.54693151 | 0.55236462 | 0.55769144 | 0.56326866 | 0.56889732 | 0.57472031 | 0.58091535 | 0.58735364 | 0.59330312 | 0.599646   | 0.60595697 | 0.61178731 | 0.61740172 | 0.62264612 | 0.62739963  | 0.63153336 | 0.63576518 | 0.6401799  | 0.64469363  | 0.64860285 | 0.65244239 |
| Brazil                          | 0.5420515  | 0.54730443 | 0.55277603 | 0.55814571 | 0.56377291 | 0.56945812 | 0.57533877 | 0.58158876 | 0.58807782 | 0.5940733  | 0.60044585 | 0.60677729 | 0.61261934 | 0.61821824 | 0.62343381 | 0.6281498   | 0.63225311 | 0.63642219 | 0.64080297 | 0.64529801  | 0.64920157 | 0.65304389 |
| Acre                            | 0.42910086 | 0.4352242  | 0.44117553 | 0.44810708 | 0.45499678 | 0.4622089  | 0.46954104 | 0.47766215 | 0.48632357 | 0.49449839 | 0.50267316 | 0.51015135 | 0.51717238 | 0.52383613 | 0.53006515 | 0.5356433   | 0.54055077 | 0.54550663 | 0.55066535 | 0.55603086  | 0.56087343 | 0.56585153 |
| Alagoas                         | 0.4119514  | 0.41679849 | 0.42219061 | 0.42769309 | 0.43363762 | 0.43978004 | 0.44625282 | 0.45313153 | 0.46014013 | 0.46685006 | 0.47413253 | 0.48187333 | 0.48887141 | 0.49558388 | 0.50181441 | 0.50753087  | 0.51247415 | 0.51742963 | 0.52241993 | 0.52738526  | 0.5315926  | 0.53565998 |
| Amapá                           | 0.5182411  | 0.5235662  | 0.52916824 | 0.53394388 | 0.53867638 | 0.54376686 | 0.54922141 | 0.5567305  | 0.56379686 | 0.5703409  | 0.57661695 | 0.58263976 | 0.58882984 | 0.59478011 | 0.60037187 | 0.60552117  | 0.60951412 | 0.61382742 | 0.61842977 | 0.62329167  | 0.6276185  | 0.63217964 |
| Amazonas                        | 0.50606222 | 0.5083553  | 0.51161263 | 0.51529552 | 0.52014233 | 0.52558709 | 0.53183699 | 0.5382475  | 0.54462383 | 0.55048988 | 0.55676855 | 0.56268609 | 0.56785845 | 0.57235744 | 0.57702706 | 0.58139865  | 0.58537281 | 0.589701   | 0.59452521 | 0.59967702  | 0.60452735 | 0.60948447 |
| Bahia                           | 0.45926884 | 0.46395652 | 0.46935003 | 0.47474591 | 0.48028291 | 0.48749493 | 0.49424201 | 0.50147269 | 0.50898765 | 0.51622681 | 0.52365228 | 0.53042636 | 0.53657321 | 0.54246878 | 0.5479409  | 0.55278909  | 0.55691537 | 0.56103638 | 0.56529991 | 0.56967424  | 0.57305195 | 0.57739425 |
| Ceará                           | 0.44905546 | 0.45376096 | 0.45907005 | 0.46430292 | 0.46989832 | 0.47575904 | 0.48218972 | 0.48892928 | 0.49650801 | 0.50377829 | 0.51166156 | 0.51960503 | 0.52649963 | 0.53294699 | 0.53883263 | 0.54403997  | 0.54843112 | 0.5527994  | 0.55713287 | 0.56146657  | 0.56509036 | 0.5686657  |
| Distrito Federal                | 0.66441614 | 0.67097978 | 0.67719353 | 0.68327888 | 0.68818668 | 0.69347873 | 0.69910631 | 0.70523907 | 0.71186188 | 0.71828101 | 0.72484482 | 0.73120969 | 0.73792571 | 0.74230807 | 0.74721747 | 0.75195391  | 0.75654003 | 0.75937914 | 0.76353805 | 0.76790887  | 0.7719088  | 0.7760164  |
| Espirito Santo                  | 0.45356148 | 0.5032861  | 0.55685332 | 0.5611935  | 0.5703109  | 0.57792774 | 0.5864601  | 0.59346908 | 0.60121699 | 0.60783254 | 0.61422973 | 0.62154727 | 0.62832847 | 0.63451315 | 0.63999595 | 0.64483223  | 0.6489861  | 0.65318995 | 0.65761295 | 0.66217932  | 0.66617627 | 0.67019259 |
| Goiás                           | 0.51143262 | 0.51912453 | 0.52497611 | 0.5341233  | 0.54316138 | 0.55036251 | 0.55758046 | 0.56505097 | 0.57259588 | 0.57975964 | 0.58687107 | 0.59396246 | 0.60064445 | 0.60670179 | 0.61209319 | 0.61682493  | 0.62077903 | 0.62478839 | 0.6289701  | 0.63327306  | 0.63780137 | 0.64093387 |
| Maranhão                        | 0.36358774 | 0.36818221 | 0.37328639 | 0.37876805 | 0.38409452 | 0.39180998 | 0.3992711  | 0.40732112 | 0.4162305  | 0.42420826 | 0.4322344  | 0.44044871 | 0.44837228 | 0.4559983  | 0.46205531 | 0.4678107   | 0.47286303 | 0.47798381 | 0.48330632 | 0.48883121  | 0.4935852  | 0.49892987 |
| Mato Grosso                     | 0.51622992 | 0.52354486 | 0.53205088 | 0.54155599 | 0.55233966 | 0.56168368 | 0.56946023 | 0.57784383 | 0.58689801 | 0.59482991 | 0.60169954 | 0.60844833 | 0.61456396 | 0.6198616  | 0.62450143 | 0.62859601  | 0.63205244 | 0.63562973 | 0.63947142 | 0.64361388  | 0.64739224 | 0.65118576 |
| Mato Grosso do Sul              | 0.5214238  | 0.52776771 | 0.5343377  | 0.5412101  | 0.54783577 | 0.55405041 | 0.56047904 | 0.56723467 | 0.57417317 | 0.58067343 | 0.58796934 | 0.59473936 | 0.60139531 | 0.60765836 | 0.61356757 | 0.61898809  | 0.62369262 | 0.62852876 | 0.63358374 | 0.63874298  | 0.64321738 | 0.64753332 |
| Minas Gerais                    | 0.5371023  | 0.54232072 | 0.54796245 | 0.55392298 | 0.5604885  | 0.56697721 | 0.57366948 | 0.58057011 | 0.5876665  | 0.59468451 | 0.60026782 | 0.60687262 | 0.61287949 | 0.61862861 | 0.62396609 | 0.62876546  | 0.63297258 | 0.63682822 | 0.64098257 | 0.64523321  | 0.64878904 | 0.65229235 |
| Pará                            | 0.46088399 | 0.46623673 | 0.46652025 | 0.47027497 | 0.47537039 | 0.48131073 | 0.4880692  | 0.49540936 | 0.50332024 | 0.51029576 | 0.51874817 | 0.5272334  | 0.53545948 | 0.54135179 | 0.54753813 | 0.55306489  | 0.55785553 | 0.56272867 | 0.56781093 | 0.57302851  | 0.57757771 | 0.5821344  |
| Paraíba                         | 0.44356385 | 0.44828897 | 0.45357463 | 0.45878929 | 0.46396904 | 0.4696234  | 0.47627149 | 0.48337298 | 0.49096978 | 0.49830088 | 0.50571183 | 0.5131686  | 0.52023424 | 0.52685659 | 0.53296335 | 0.538534627 | 0.54285845 | 0.54731419 | 0.55182047 | 0.55632748  | 0.56013944 | 0.56368615 |
| Paraná                          | 0.55764124 | 0.56430073 | 0.57125354 | 0.57846607 | 0.58556012 | 0.59191819 | 0.59816094 | 0.60494367 | 0.61151613 | 0.61731326 | 0.62318032 | 0.62898059 | 0.6349992  | 0.63969304 | 0.64480177 | 0.64956588  | 0.6537573  | 0.65800635 | 0.66266957 | 0.66732112  | 0.67118223 | 0.67485657 |
| Pernambuco                      | 0.46036538 | 0.46646393 | 0.46970161 | 0.47484008 | 0.48033601 | 0.48638652 | 0.49287223 | 0.49985444 | 0.50714301 | 0.51431826 | 0.52227143 | 0.53013497 | 0.53789083 | 0.54507514 | 0.55178047 | 0.55775813  | 0.56292156 | 0.56802278 | 0.57314208 | 0.5781638   | 0.58251064 | 0.58676422 |
| Piauí                           | 0.3982112  | 0.4033661  | 0.40839295 | 0.41363987 | 0.41928292 | 0.42540848 | 0.43225262 | 0.43962404 | 0.44780789 | 0.45659694 | 0.46464946 | 0.47285306 | 0.48032714 | 0.48729461 | 0.49362619 | 0.49922648  | 0.50392386 | 0.50851113 | 0.51309203 | 0.51764091  | 0.52147543 | 0.52531332 |
| Rio de Janeiro                  | 0.61305001 | 0.61835324 | 0.62369883 | 0.62844558 | 0.63359763 | 0.63893963 | 0.64363218 | 0.64869694 | 0.65412966 | 0.65989302 | 0.6646095  | 0.66959267 | 0.6749798  | 0.68021835 | 0.68514992 | 0.68975329  | 0.69439831 | 0.69891903 | 0.70321155 | 0.70811781  | 0.71223305 | 0.71609384 |
| Rio Grande do Norte             | 0.45873082 | 0.46428238 | 0.47050124 | 0.47640276 | 0.48275443 | 0.48958579 | 0.49701859 | 0.50477026 | 0.51260986 | 0.52007218 | 0.52790584 | 0.53575974 | 0.54318056 | 0.55013798 | 0.55654885 | 0.56236331  | 0.56716165 | 0.57201278 | 0.57691059 | 0.58176686  | 0.58587668 | 0.58985482 |
| Rio Grande do Sul               | 0.59177442 | 0.59721093 | 0.60286137 | 0.60844358 | 0.61397434 | 0.61918651 | 0.62451543 | 0.63026995 | 0.63616683 | 0.64153856 | 0.64721481 | 0.65241174 | 0.65712977 | 0.66170394 | 0.66604768 | 0.67015455  | 0.67381145 | 0.6776695  | 0.68176946 | 0.68604738  | 0.68972093 | 0.69333753 |
| Rondônia                        | 0.48414852 | 0.49035524 | 0.4974075  | 0.50509925 | 0.51331333 | 0.52168498 | 0.52935747 | 0.53721999 | 0.54545468 | 0.55363802 | 0.56199134 | 0.57060824 | 0.57832751 | 0.58536475 | 0.59173397 | 0.59738986  | 0.60224486 | 0.60706357 | 0.6119503  | 0.6167603   | 0.62087528 | 0.62485467 |
| Roraima                         | 0.51631806 | 0.5226118  | 0.52892884 | 0.53490412 | 0.54009252 | 0.54515053 | 0.55076404 | 0.55686254 | 0.56331634 | 0.56946522 | 0.57550591 | 0.58117384 | 0.58602361 | 0.59065211 | 0.59495451 | 0.59873076  | 0.60192626 | 0.60532266 | 0.60900961 | 0.61316143  | 0.61700942 | 0.62100557 |
| Santa Catarina                  | 0.59174644 | 0.59799221 | 0.60428927 | 0.61066548 | 0.61721484 | 0.6234999  | 0.62967057 | 0.63612891 | 0.64291318 | 0.64891466 | 0.65541699 | 0.66170105 | 0.66721635 | 0.67226091 | 0.67671186 | 0.68056338  | 0.68374263 | 0.68712054 | 0.69078787 | 0.69464644  | 0.69801177 | 0.7013407  |
| São Paulo                       | 0.61146726 | 0.61742224 | 0.62305869 | 0.62826422 | 0.63342469 | 0.63856599 | 0.64372872 | 0.64914092 | 0.65475174 | 0.65967818 | 0.66517002 | 0.67062106 | 0.67567899 | 0.68017911 | 0.68565109 | 0.68983514  | 0.69359848 | 0.69753702 | 0.70174714 | 0.70614456  | 0.70995406 | 0.7137276  |
| Sergipe                         | 0.48022488 | 0.48525471 | 0.49100615 | 0.49676668 | 0.50282355 | 0.50910864 | 0.51578591 | 0.52283265 | 0.53017827 | 0.53685809 | 0.54381913 | 0.55045065 | 0.55674883 | 0.56264961 | 0.56800935 | 0.57273835  | 0.57671048 | 0.5807074  | 0.58481942 | 0.58899082  | 0.59243863 | 0.59584018 |
| Tocantins                       | 0.43208213 | 0.4414859  | 0.45121971 | 0.46155584 | 0.4718882  | 0.48187005 | 0.49162077 | 0.50186296 | 0.51250914 | 0.52266    | 0.53302898 | 0.54252897 | 0.55132071 | 0.55961728 | 0.56732128 | 0.57440259  | 0.58065846 | 0.58681648 | 0.59287864 | 0.5988406   | 0.60384648 | 0.60858768 |
| Paraguay                        | 0.52300779 | 0.52691766 | 0.53117736 | 0.53536013 | 0.53955666 | 0.5436227  | 0.5479433  | 0.55275888 | 0.5580169  | 0.56290006 | 0.56884656 | 0.57495446 | 0.58065019 | 0.58724704 | 0.59393515 | 0.60048133  | 0.60701814 | 0.61358159 | 0.62003236 | 0.62657014  | 0.63105769 | 0.6357181  |
| North Africa and Middle East    | 0.51682421 | 0.52409127 | 0.53114945 | 0.53829213 | 0.54567816 | 0.553      |            |            |            |            |            |            |            |            |            |             |            |            |            |             |            |            |

|                        |            |            |            |            |            |            |            |            |            |            |            |            |            |            |             |             |            |            |            |            |            |            |
|------------------------|------------|------------|------------|------------|------------|------------|------------|------------|------------|------------|------------|------------|------------|------------|-------------|-------------|------------|------------|------------|------------|------------|------------|
| Markazi                | 0.55165623 | 0.5618775  | 0.57175965 | 0.58231232 | 0.59263399 | 0.60243907 | 0.61079517 | 0.61792865 | 0.62623605 | 0.62872574 | 0.63421755 | 0.63974771 | 0.64343683 | 0.64636712 | 0.64958868  | 0.65315602  | 0.6580912  | 0.66391587 | 0.66941126 | 0.6741577  | 0.67837742 | 0.68284382 |
| Mazandaran             | 0.60136911 | 0.60811809 | 0.61615705 | 0.62565229 | 0.63572296 | 0.64647724 | 0.6535376  | 0.66354985 | 0.67026376 | 0.67670989 | 0.68194593 | 0.68754549 | 0.6912232  | 0.69416052 | 0.69731276  | 0.70078164  | 0.70577577 | 0.71153246 | 0.71692654 | 0.72135492 | 0.72560497 | 0.72992999 |
| North Khorasan         | 0.47466473 | 0.48808215 | 0.50063279 | 0.5141521  | 0.52795859 | 0.54217727 | 0.55362013 | 0.56325539 | 0.57115498 | 0.57803034 | 0.58353578 | 0.59267629 | 0.59772944 | 0.60177242 | 0.60606771  | 0.61091752  | 0.61724259 | 0.62407874 | 0.63240584 | 0.63931158 | 0.64549311 | 0.6516102  |
| Qazvin                 | 0.5159944  | 0.53207715 | 0.54603257 | 0.56101473 | 0.57588077 | 0.59022113 | 0.60293951 | 0.61284177 | 0.62093951 | 0.62778452 | 0.63474628 | 0.64134344 | 0.64787637 | 0.6542967  | 0.66067173  | 0.66791252  | 0.67602667 | 0.68509313 | 0.69416052 | 0.70322801 | 0.7122955  | 0.72136304 |
| Qom                    | 0.5560084  | 0.56442097 | 0.573137   | 0.5822297  | 0.59142963 | 0.60085109 | 0.60969061 | 0.61595255 | 0.62091434 | 0.62596655 | 0.63193756 | 0.63831677 | 0.64310698 | 0.64734331 | 0.6520977   | 0.65700564  | 0.66322942 | 0.67039789 | 0.67729151 | 0.6833338  | 0.68869247 | 0.69407591 |
| Semnan                 | 0.58526817 | 0.59427607 | 0.60359812 | 0.61339484 | 0.6230342  | 0.63250122 | 0.64080173 | 0.64805461 | 0.65418495 | 0.65985729 | 0.66614538 | 0.67269035 | 0.67794902 | 0.68199998 | 0.68687855  | 0.69177677  | 0.6977284  | 0.70432963 | 0.71030264 | 0.71528784 | 0.71953728 | 0.72392638 |
| Sistan and Baluchistan | 0.4298579  | 0.43874689 | 0.44740568 | 0.45628781 | 0.4653299  | 0.47454565 | 0.48305987 | 0.4829184  | 0.48320659 | 0.48305692 | 0.48456532 | 0.48722436 | 0.48829234 | 0.48878132 | 0.490069476 | 0.490500313 | 0.50203843 | 0.51167765 | 0.52247451 | 0.53282763 | 0.54220697 | 0.55130598 |
| South Khorasan         | 0.47900871 | 0.48962953 | 0.5010653  | 0.51342883 | 0.52606123 | 0.5388346  | 0.54973374 | 0.55879773 | 0.56611706 | 0.57216367 | 0.57981909 | 0.58729861 | 0.59279322 | 0.59761989 | 0.60304895  | 0.60889831  | 0.61634447 | 0.62476791 | 0.63297067 | 0.64027843 | 0.64672361 | 0.65312538 |
| Tehran                 | 0.66735854 | 0.67430059 | 0.68149363 | 0.68901755 | 0.69649539 | 0.70389952 | 0.71032373 | 0.71589513 | 0.72041864 | 0.72443014 | 0.72898465 | 0.7336284  | 0.73860465 | 0.73998561 | 0.7432428   | 0.74690488  | 0.7518639  | 0.75762071 | 0.76300458 | 0.76764971 | 0.77174329 | 0.77603245 |
| West Azarbaijan        | 0.48878611 | 0.49836255 | 0.50842601 | 0.51912335 | 0.53000796 | 0.54087308 | 0.54972823 | 0.55624435 | 0.56092029 | 0.56483796 | 0.56947461 | 0.57420466 | 0.57758425 | 0.58009813 | 0.58325168  | 0.58733977  | 0.59304459 | 0.60020635 | 0.60762044 | 0.61448487 | 0.62073248 | 0.62711246 |
| Yazd                   | 0.57230228 | 0.5821624  | 0.59202505 | 0.60198352 | 0.61180759 | 0.62171034 | 0.63017657 | 0.63719027 | 0.64266609 | 0.64757973 | 0.65319099 | 0.65912493 | 0.66313631 | 0.66664806 | 0.67028166  | 0.67485775  | 0.68107005 | 0.68846204 | 0.6956733  | 0.70205677 | 0.7076976  | 0.71334428 |
| Zanjan                 | 0.49513564 | 0.50343129 | 0.51348507 | 0.52535976 | 0.53835734 | 0.55220776 | 0.56492451 | 0.57577594 | 0.58434419 | 0.59152648 | 0.59889183 | 0.60624799 | 0.61159146 | 0.61603449 | 0.62063635  | 0.62542478  | 0.63161215 | 0.63866159 | 0.6454688  | 0.65140858 | 0.65653951 | 0.66172913 |
| Iraq                   | 0.4723764  | 0.48145832 | 0.48866474 | 0.49217444 | 0.49893388 | 0.50471943 | 0.51091805 | 0.51769877 | 0.52524291 | 0.53320091 | 0.54234328 | 0.55304856 | 0.56474547 | 0.57669    | 0.58831765  | 0.59949401  | 0.61150865 | 0.62267453 | 0.63325211 | 0.64363532 | 0.65330038 | 0.66262623 |
| Jordan                 | 0.59790939 | 0.5931828  | 0.59900338 | 0.60494579 | 0.6119344  | 0.61990923 | 0.62780381 | 0.63567028 | 0.64382965 | 0.65219632 | 0.65994499 | 0.66739668 | 0.67456892 | 0.68111996 | 0.68713404  | 0.69259206  | 0.6984733  | 0.70392383 | 0.70941288 | 0.71499895 | 0.72060624 | 0.72553073 |
| Kuwait                 | 0.71835756 | 0.72246083 | 0.72681698 | 0.73177868 | 0.73815371 | 0.74638491 | 0.75492849 | 0.76241148 | 0.77002621 | 0.77774655 | 0.78487393 | 0.79182107 | 0.79833699 | 0.80458383 | 0.81074323  | 0.81692941  | 0.82302653 | 0.82888699 | 0.83437146 | 0.83986831 | 0.84345981 | 0.84665105 |
| Lebanon                | 0.58269828 | 0.5891855  | 0.59597879 | 0.60296724 | 0.61084576 | 0.61939136 | 0.62779122 | 0.63693823 | 0.6466766  | 0.65743319 | 0.66880452 | 0.68092062 | 0.69391098 | 0.704811   | 0.71242387  | 0.71869729  | 0.72458335 | 0.72996329 | 0.73474624 | 0.73864401 | 0.74200972 | 0.74474635 |
| Libya                  | 0.63704793 | 0.64468813 | 0.65166915 | 0.65934312 | 0.66691393 | 0.67532227 | 0.683702   | 0.69185513 | 0.69887325 | 0.70499847 | 0.7113625  | 0.71146666 | 0.71670069 | 0.71766525 | 0.71604221  | 0.71365137  | 0.71076014 | 0.71066626 | 0.71272044 | 0.71615724 | 0.72027039 | 0.7257714  |
| Morocco                | 0.41534403 | 0.42059153 | 0.42577575 | 0.43121781 | 0.43682235 | 0.44253134 | 0.44867616 | 0.45503632 | 0.46180355 | 0.46892989 | 0.4762698  | 0.48392215 | 0.49160339 | 0.49952861 | 0.50744327  | 0.51558289  | 0.52351859 | 0.53161086 | 0.53972967 | 0.54783744 | 0.55524607 | 0.5626983  |
| Oman                   | 0.60842154 | 0.62216063 | 0.63516213 | 0.64724909 | 0.65762612 | 0.66640123 | 0.67355389 | 0.68055558 | 0.68695226 | 0.70309857 | 0.71068869 | 0.71826453 | 0.72645007 | 0.73434249 | 0.73874377  | 0.74359718  | 0.74879719 | 0.75378606 | 0.75917951 | 0.76452786 | 0.76885422 | 0.7733916  |
| Palatine               | 0.4606815  | 0.4652991  | 0.46860026 | 0.47288173 | 0.47852732 | 0.48532059 | 0.49189041 | 0.49897843 | 0.50684948 | 0.51581584 | 0.52571191 | 0.53677763 | 0.54829543 | 0.55916348 | 0.56923988  | 0.57920426  | 0.58949277 | 0.59915719 | 0.60812486 | 0.61646684 | 0.62381002 | 0.63101167 |
| Qatar                  | 0.71483161 | 0.72083106 | 0.72711271 | 0.73353566 | 0.74022321 | 0.74718936 | 0.75412303 | 0.76099613 | 0.76765923 | 0.77427685 | 0.78080707 | 0.78732145 | 0.7934949  | 0.79961155 | 0.80572571  | 0.81187285  | 0.81797984 | 0.82401687 | 0.82996213 | 0.83580528 | 0.84164764 | 0.84666058 |
| Saudi Arabia           | 0.64231177 | 0.65150209 | 0.66035686 | 0.66983958 | 0.67991786 | 0.69052085 | 0.70115261 | 0.71144214 | 0.7219602  | 0.73118549 | 0.74030067 | 0.74959545 | 0.75905494 | 0.76783786 | 0.77517813  | 0.78230008  | 0.78886788 | 0.79488629 | 0.80065698 | 0.80680874 | 0.81054186 | 0.81514349 |
| Sudan                  | 0.34687581 | 0.35421551 | 0.36172824 | 0.36969365 | 0.37792066 | 0.38668571 | 0.39615137 | 0.40607999 | 0.4160876  | 0.42597592 | 0.4361711  | 0.44723944 | 0.45679026 | 0.466436   | 0.47636213  | 0.48654944  | 0.49684822 | 0.50688353 | 0.51621409 | 0.52500912 | 0.53345542 | 0.54194794 |
| Syria                  | 0.50714369 | 0.51385011 | 0.52130974 | 0.52893576 | 0.53808447 | 0.54975045 | 0.56048476 | 0.57002182 | 0.57990499 | 0.58778192 | 0.59597676 | 0.60152446 | 0.6028726  | 0.60241013 | 0.6022576   | 0.60228291  | 0.60291118 | 0.60489637 | 0.60850716 | 0.61333684 | 0.61772759 | 0.62300407 |
| Tunisia                | 0.55667265 | 0.5644201  | 0.57171953 | 0.5788267  | 0.58603259 | 0.59293776 | 0.59975851 | 0.60669678 | 0.61335292 | 0.62010683 | 0.62643277 | 0.63201984 | 0.63757834 | 0.64300581 | 0.6482974   | 0.65341354  | 0.65835352 | 0.66322285 | 0.668219   | 0.67317055 | 0.67761515 | 0.68243222 |
| Turkiye                | 0.53586633 | 0.54235913 | 0.54902164 | 0.55610253 | 0.564024   | 0.57249879 | 0.58138318 | 0.59044239 | 0.59952106 | 0.60710462 | 0.6159723  | 0.62478721 | 0.63409708 | 0.64332382 | 0.65261774  | 0.66194815  | 0.6810662  | 0.6899587  | 0.69898587 | 0.70799794 | 0.71629472 | 0.72462637 |
| United Arab Emirates   | 0.70690609 | 0.71678579 | 0.72734642 | 0.73814399 | 0.74852955 | 0.75942809 | 0.80553702 | 0.81487088 | 0.82383047 | 0.83218425 | 0.8392128  | 0.8358611  | 0.8330382  | 0.83358373 | 0.8341755   | 0.83522071  | 0.83721355 | 0.83990014 | 0.84298533 | 0.84615198 | 0.84931773 | 0.85250532 |
| Yemen                  | 0.29714516 | 0.30611242 | 0.31306502 | 0.32408169 | 0.3337129  | 0.34346256 | 0.35347295 | 0.36330122 | 0.37314029 | 0.38276225 | 0.39293664 | 0.4014718  | 0.40956135 | 0.4176424  | 0.42518967  | 0.43019779  | 0.43423298 | 0.43754916 | 0.44072799 | 0.4440014  | 0.44689307 | 0.45037638 |
| South Asia             | 0.38338846 | 0.38953334 | 0.39519407 | 0.40098342 | 0.40718055 | 0.41398666 | 0.42136736 | 0.42926185 | 0.43701186 | 0.44519735 | 0.45407579 | 0.46333927 | 0.47308056 | 0.48343427 | 0.49408436  | 0.50489146  | 0.515311   | 0.52512844 | 0.53447741 | 0.5432457  | 0.55058557 | 0.55786466 |
| South Asia             | 0.38338846 | 0.38953334 | 0.39519407 | 0.40098342 | 0.40718055 | 0.41398666 | 0.42136736 | 0.42926185 | 0.43701186 | 0.44519735 | 0.45407579 | 0.46333927 | 0.47308056 | 0.48343427 | 0.49408436  | 0.50489146  | 0.515311   | 0.52512844 | 0.53447741 | 0.5432457  | 0.55058557 | 0.55786466 |
| Bangladesh             | 0.29725198 | 0.30318855 | 0.30860069 | 0.31436004 | 0.32092285 | 0.32809051 | 0.3356906  | 0.34393255 | 0.35252003 | 0.36148151 | 0.37059896 | 0.38012489 | 0.39062355 | 0.40170648 | 0.41326317  | 0.42548212  | 0.43770991 | 0.44975241 | 0.46171775 | 0.473265   | 0.48307917 | 0.49242088 |
| Bhutan                 | 0.29880487 | 0.30820065 | 0.31794354 | 0.32767042 | 0.33728649 | 0.34699858 | 0.35682421 | 0.3675605  | 0.37823354 | 0.38897716 | 0.39975194 | 0.41014925 | 0.41944322 | 0.42797067 | 0.43469927  | 0.44181075  | 0.44840185 | 0.4542805  | 0.45962471 | 0.46463335 | 0.46874148 | 0.47306238 |
| India                  | 0.39575233 | 0.40183747 | 0.40741141 | 0.41313158 | 0.41918496 | 0.42591306 | 0.43321356 | 0.44135146 | 0.44922585 | 0.45767233 | 0.467019   | 0.47683291 | 0.48721088 | 0.49831798 | 0.5097221   | 0.52124272  | 0.5322002  | 0.54238851 | 0.55193033 | 0.56080993 | 0.56813815 | 0.57540165 |
| Nepal                  | 0.27271911 | 0.28128747 | 0.28951361 | 0.2977726  | 0.30619633 | 0.3146618  | 0.32305635 | 0.33144561 | 0.34015071 | 0.34870189 | 0.3568681  | 0.3646426  | 0.37243759 | 0.38002233 | 0.38768909  | 0.39502115  | 0.40162678 | 0.40846387 | 0.41523668 | 0.42200725 | 0.42741709 | 0.43317463 |
| Pakistan               | 0.37431913 | 0.38059393 | 0.38662999 | 0.39271926 | 0.39908417 | 0.40566744 | 0.41223483 | 0.41851976 | 0.4243842  | 0.43001983 | 0.43564066 | 0.44145559 | 0.4470966  | 0.4528231  | 0.45817842  | 0.46479267  | 0.47102217 | 0.47754414 | 0.48432613 | 0.49102298 | 0.49736441 | 0.50402869 |
| Azad Jammu & Kashmir   | 0.40149838 | 0.40860326 | 0.41545557 | 0.4223537  | 0.42958201 | 0.43704644 | 0.44466119 | 0.45231842 | 0.45979782 | 0.46714764 | 0.47426164 | 0.48132564 | 0.48792453 | 0.49423462 | 0.50053167  | 0.50662508  | 0.51270136 | 0.51879497 | 0.52499004 | 0.53093598 | 0.53639063 | 0.54121877 |
| Balochistan            | 0.3041235  | 0.30936329 | 0.31448679 | 0.31976754 | 0.32540818 | 0.33135828 | 0.33731296 |            |            |            |            |            |            |            |             |             |            |            |            |            |            |            |

|                         |            |            |            |            |            |            |            |            |            |            |            |            |             |             |            |             |            |            |            |            |            |            |
|-------------------------|------------|------------|------------|------------|------------|------------|------------|------------|------------|------------|------------|------------|-------------|-------------|------------|-------------|------------|------------|------------|------------|------------|------------|
| Tokelau                 | 0.57181437 | 0.5769156  | 0.58185832 | 0.58685435 | 0.59232424 | 0.59817612 | 0.60442939 | 0.61116324 | 0.61794025 | 0.62407008 | 0.63017554 | 0.63601652 | 0.64161199  | 0.64796615  | 0.653232   | 0.65879899  | 0.66397432 | 0.66905413 | 0.67417951 | 0.67924784 | 0.68293738 | 0.68642562 |
| Tonga                   | 0.546302   | 0.55105425 | 0.55600835 | 0.56073607 | 0.56480638 | 0.56844917 | 0.57161987 | 0.57435151 | 0.57730542 | 0.57917075 | 0.58065751 | 0.58265672 | 0.58477088  | 0.58735114  | 0.59082685 | 0.59496575  | 0.60034367 | 0.60623459 | 0.61195394 | 0.61732406 | 0.62210466 | 0.62639494 |
| Tuvalu                  | 0.47495682 | 0.48085089 | 0.48725225 | 0.49275471 | 0.49769215 | 0.50185131 | 0.50597541 | 0.51005043 | 0.5156116  | 0.51987057 | 0.52345551 | 0.5274424  | 0.53120323  | 0.53516623  | 0.53912224 | 0.54404786  | 0.54917393 | 0.55446668 | 0.5598594  | 0.56604549 | 0.5716661  | 0.57662053 |
| Vanuatu                 | 0.39215835 | 0.39532506 | 0.39723778 | 0.40039646 | 0.4032251  | 0.40648857 | 0.41050173 | 0.41491558 | 0.41985324 | 0.42484563 | 0.42965805 | 0.43428304 | 0.43862     | 0.44272018  | 0.4466873  | 0.45032986  | 0.45402726 | 0.45810663 | 0.46280022 | 0.46672616 | 0.47003839 | 0.47310071 |
| South East Asia         | 0.53456661 | 0.53901043 | 0.54347855 | 0.54805101 | 0.5527042  | 0.5573913  | 0.56230217 | 0.56765426 | 0.57320839 | 0.57849739 | 0.58426847 | 0.59041462 | 0.59678029  | 0.60314492  | 0.60943868 | 0.61568907  | 0.62183986 | 0.62797813 | 0.63409588 | 0.64010676 | 0.64560966 | 0.6497773  |
| Cambodia                | 0.33607503 | 0.34250791 | 0.34946571 | 0.35692966 | 0.36485464 | 0.37333181 | 0.38169817 | 0.38987623 | 0.39767952 | 0.40522093 | 0.41211112 | 0.41956441 | 0.42716975  | 0.42717506  | 0.4339775  | 0.43948736  | 0.44535817 | 0.45122174 | 0.45734149 | 0.46364343 | 0.46887605 | 0.47362149 |
| Indonesia               | 0.53378959 | 0.53797798 | 0.54224568 | 0.54655026 | 0.55090231 | 0.55542491 | 0.56026592 | 0.5658119  | 0.57222527 | 0.5788669  | 0.58598242 | 0.59365298 | 0.6011857   | 0.6085099   | 0.61549989 | 0.62222247  | 0.62866662 | 0.63489574 | 0.64094875 | 0.64686546 | 0.65192665 | 0.65686834 |
| Aceh                    | 0.56026794 | 0.56438388 | 0.56872189 | 0.57307457 | 0.57772252 | 0.58230388 | 0.58672602 | 0.59150689 | 0.59674327 | 0.60181305 | 0.60705953 | 0.61268272 | 0.61854653  | 0.62454873  | 0.63050526 | 0.63648236  | 0.642395   | 0.6482508  | 0.65405777 | 0.6598518  | 0.66475876 | 0.66955164 |
| Bali                    | 0.53616426 | 0.53927741 | 0.54257347 | 0.54593923 | 0.54936586 | 0.55303270 | 0.55703291 | 0.56190502 | 0.56780069 | 0.57417724 | 0.58114054 | 0.58857033 | 0.59582696  | 0.60287149  | 0.60965942 | 0.61620184  | 0.62245407 | 0.62847275 | 0.63430388 | 0.64000539 | 0.64485235 | 0.64958588 |
| Bangka-Belitung Islands | 0.5289114  | 0.53212382 | 0.53552897 | 0.53919753 | 0.54298703 | 0.54698955 | 0.5512765  | 0.55613699 | 0.56225432 | 0.56835578 | 0.5747897  | 0.58178671 | 0.58868338  | 0.59537815  | 0.60187021 | 0.60823522  | 0.61460851 | 0.62102515 | 0.62738145 | 0.63359559 | 0.639889   | 0.64425964 |
| Banten                  | 0.52859153 | 0.53158023 | 0.53463584 | 0.53775383 | 0.54095116 | 0.54436088 | 0.54818718 | 0.55279114 | 0.55837624 | 0.56437318 | 0.57102114 | 0.57857249 | 0.5869379   | 0.59310912  | 0.59988389 | 0.60662667  | 0.61303665 | 0.61918089 | 0.62514768 | 0.63096052 | 0.63587866 | 0.64071299 |
| Bengkulu                | 0.49336859 | 0.49684776 | 0.50031399 | 0.50391788 | 0.50767793 | 0.51176383 | 0.51629332 | 0.52137677 | 0.52812761 | 0.53479748 | 0.54181862 | 0.54940364 | 0.55681278  | 0.56490499  | 0.57103184 | 0.5777767   | 0.5843805  | 0.59086907 | 0.5972185  | 0.60341936 | 0.60863108 | 0.61367065 |
| Gorontalo               | 0.44602471 | 0.44716892 | 0.44876276 | 0.45080182 | 0.45329135 | 0.45624028 | 0.4604025  | 0.46566364 | 0.4724715  | 0.48008009 | 0.48850741 | 0.49763464 | 0.50656442  | 0.51519052  | 0.52338898 | 0.53119496  | 0.53898668 | 0.546591   | 0.55250868 | 0.55910806 | 0.56463912 | 0.56999024 |
| Jakarta                 | 0.68357472 | 0.68386419 | 0.6932305  | 0.6980252  | 0.70277371 | 0.70751587 | 0.71242858 | 0.71786297 | 0.72395734 | 0.73028391 | 0.73689221 | 0.74392346 | 0.75070975  | 0.75717729  | 0.7634451  | 0.76925752  | 0.77492035 | 0.78034984 | 0.78558506 | 0.79067161 | 0.79580912 | 0.79949044 |
| Jambi                   | 0.50341566 | 0.50758427 | 0.51194615 | 0.51647752 | 0.52114362 | 0.5258929  | 0.53117179 | 0.5374601  | 0.54438251 | 0.5517263  | 0.55919232 | 0.56712932 | 0.575803825 | 0.584885735 | 0.59428529 | 0.60427083  | 0.61417963 | 0.62376325 | 0.63287806 | 0.64239761 | 0.65234023 | 0.66293638 |
| West Java               | 0.52755512 | 0.53072386 | 0.5339323  | 0.53721964 | 0.54068547 | 0.54455824 | 0.54898783 | 0.55429603 | 0.56051638 | 0.56700756 | 0.57393987 | 0.58144324 | 0.58878356  | 0.596741    | 0.60283135 | 0.6094301   | 0.61576965 | 0.62195319 | 0.62798418 | 0.6338634  | 0.63884136 | 0.64367663 |
| Central Java            | 0.49003761 | 0.49375055 | 0.49769922 | 0.50190521 | 0.50636632 | 0.51119198 | 0.51647028 | 0.52242419 | 0.52913658 | 0.53597076 | 0.54318954 | 0.5508159  | 0.55824886  | 0.56549478  | 0.57238966 | 0.57903147  | 0.58540672 | 0.5915727  | 0.59758761 | 0.60349025 | 0.60850881 | 0.61338882 |
| East Java               | 0.51482937 | 0.51994422 | 0.52515545 | 0.53039257 | 0.53563368 | 0.54100965 | 0.54661489 | 0.55280696 | 0.55971581 | 0.5667625  | 0.57426857 | 0.58226911 | 0.59008313  | 0.59756583  | 0.60465166 | 0.61140792  | 0.61783986 | 0.62401929 | 0.62992862 | 0.63578677 | 0.64072987 | 0.64551738 |
| West Kalimantan         | 0.48143807 | 0.4849739  | 0.48839009 | 0.49165766 | 0.49474646 | 0.4975574  | 0.5004363  | 0.50407497 | 0.50861467 | 0.5136176  | 0.5193251  | 0.52577988 | 0.53252363  | 0.53933342  | 0.54594146 | 0.55237456  | 0.55860712 | 0.56466654 | 0.57058178 | 0.57636235 | 0.58128935 | 0.58612167 |
| South Kalimantan        | 0.51724759 | 0.5204995  | 0.52380167 | 0.52709516 | 0.53026868 | 0.53339914 | 0.5366955  | 0.5406522  | 0.54545082 | 0.55062024 | 0.55642207 | 0.56299804 | 0.56966811  | 0.57633518  | 0.5828793  | 0.58924978  | 0.59547153 | 0.6015648  | 0.60751384 | 0.61334189 | 0.61831046 | 0.62320608 |
| Central Kalimantan      | 0.53838456 | 0.54053222 | 0.5429412  | 0.5454602  | 0.54791457 | 0.55040024 | 0.55309363 | 0.55639235 | 0.56027621 | 0.56469527 | 0.57137421 | 0.57788061 | 0.58453086  | 0.59117447  | 0.59766503 | 0.60395753  | 0.61019142 | 0.61640037 | 0.6225626  | 0.62864572 | 0.63468662 | 0.63989383 |
| East Kalimantan         | 0.63879647 | 0.64279042 | 0.64684569 | 0.6511169  | 0.6555905  | 0.66020366 | 0.66508645 | 0.67062866 | 0.67711686 | 0.68365906 | 0.69066469 | 0.6984318  | 0.70607231  | 0.71361318  | 0.72020158 | 0.72672101  | 0.73287396 | 0.73872114 | 0.74436852 | 0.74989106 | 0.75463949 | 0.75929387 |
| North Kalimantan        | 0.62429697 | 0.6292073  | 0.63463734 | 0.63974222 | 0.64531857 | 0.65115801 | 0.65717162 | 0.66355161 | 0.67058098 | 0.6771463  | 0.68391938 | 0.69114793 | 0.69826096  | 0.70517295  | 0.71188818 | 0.71842699  | 0.72474458 | 0.73089841 | 0.73687353 | 0.74271922 | 0.74790202 | 0.75298676 |
| Riau Islands            | 0.64675899 | 0.64991663 | 0.65299036 | 0.65606106 | 0.65911176 | 0.66231984 | 0.6659116  | 0.6702922  | 0.6756503  | 0.68112742 | 0.68712948 | 0.69358947 | 0.69999368  | 0.70623153  | 0.71219944 | 0.71794241  | 0.72348517 | 0.72885742 | 0.73407381 | 0.73915486 | 0.7434669  | 0.74775431 |
| Lampung                 | 0.47905514 | 0.4838897  | 0.48810632 | 0.49217245 | 0.49620385 | 0.50041727 | 0.50517671 | 0.51099373 | 0.51802019 | 0.52564643 | 0.53407416 | 0.54289137 | 0.5513703   | 0.5593671   | 0.56688711 | 0.57397078  | 0.58064169 | 0.5869908  | 0.59308111 | 0.598979   | 0.60397338 | 0.60887136 |
| Maluku                  | 0.5229834  | 0.51832651 | 0.51349154 | 0.50800674 | 0.5022141  | 0.49670303 | 0.49251133 | 0.49083345 | 0.49229133 | 0.49595364 | 0.50170832 | 0.50894016 | 0.51740502  | 0.52509196  | 0.5329444  | 0.541813291 | 0.54813291 | 0.5554181  | 0.56233884 | 0.56918695 | 0.57482534 | 0.58032188 |
| North Maluku            | 0.45598959 | 0.45832062 | 0.45989066 | 0.46091262 | 0.46163489 | 0.46238837 | 0.46358432 | 0.46460875 | 0.46549264 | 0.46716491 | 0.48333748 | 0.49176511 | 0.50206361  | 0.50862948  | 0.51668894 | 0.524421    | 0.5318067  | 0.53888887 | 0.5457041  | 0.55229142 | 0.55764156 | 0.56291087 |
| West Nusa Tenggara      | 0.44070533 | 0.44798776 | 0.4552512  | 0.46240815 | 0.46962199 | 0.47675744 | 0.48383361 | 0.491206   | 0.49889746 | 0.50635697 | 0.51404228 | 0.52193726 | 0.5296643   | 0.53717467  | 0.54441446 | 0.5513934   | 0.55809279 | 0.56453903 | 0.57078447 | 0.5768659  | 0.5820152  | 0.58703462 |
| East Nusa Tenggara      | 0.42845105 | 0.43095467 | 0.4338165  | 0.43696531 | 0.44029416 | 0.44383243 | 0.44776538 | 0.4525551  | 0.45847722 | 0.46489578 | 0.47209961 | 0.48008645 | 0.48801472  | 0.49578864  | 0.50327052 | 0.51053667  | 0.51761217 | 0.52461615 | 0.53149789 | 0.53824536 | 0.54391325 | 0.54945119 |
| Papua                   | 0.53252213 | 0.53609896 | 0.53928483 | 0.5420573  | 0.54444202 | 0.54693318 | 0.54958513 | 0.55306955 | 0.55675666 | 0.5613014  | 0.56958178 | 0.57705575 | 0.58464597  | 0.59219642  | 0.59954264 | 0.60674908  | 0.61376989 | 0.62068688 | 0.62747226 | 0.63412061 | 0.64001264 | 0.64580288 |
| West Papua              | 0.52885419 | 0.53153173 | 0.53433132 | 0.53743263 | 0.54079912 | 0.54472282 | 0.54952541 | 0.55578751 | 0.56394076 | 0.57329506 | 0.58421778 | 0.59648716 | 0.60772107  | 0.61803843  | 0.62740989 | 0.6359972   | 0.64387731 | 0.65115933 | 0.65795906 | 0.6644003  | 0.66982939 | 0.67512564 |
| Riau                    | 0.60519772 | 0.61016013 | 0.61472702 | 0.61967314 | 0.62462685 | 0.62962935 | 0.63474092 | 0.64000295 | 0.64549983 | 0.65203616 | 0.65996766 | 0.66750217 | 0.67490295  | 0.68198684  | 0.68873732 | 0.69518683  | 0.70131379 | 0.70725774 | 0.7130141  | 0.71793646 | 0.72278452 |            |
| West Sulawesi           | 0.45086369 | 0.45264887 | 0.45457474 | 0.45667968 | 0.45898469 | 0.46174285 | 0.46529875 | 0.47021593 | 0.47685466 | 0.48430645 | 0.49271753 | 0.50194275 | 0.51109162  | 0.51991839  | 0.5283405  | 0.53627554  | 0.54378197 | 0.55095746 | 0.55786177 | 0.56453058 | 0.57018471 | 0.57565685 |
| South Sulawesi          | 0.49163905 | 0.49594103 | 0.50036845 | 0.50482569 | 0.50932435 | 0.51364434 | 0.51836497 | 0.52395152 | 0.53070743 | 0.53860618 | 0.5461011  | 0.55461525 | 0.56283476  | 0.571071405 | 0.57942324 | 0.58540084  | 0.59222524 | 0.59873435 | 0.60497768 | 0.61102327 | 0.61614532 | 0.62113541 |
| Central Sulawesi        | 0.48736392 | 0.49125871 | 0.49536197 | 0.49950147 | 0.50362144 | 0.50768352 | 0.51201066 | 0.51720467 | 0.52358948 | 0.53057415 | 0.53837511 | 0.54702868 | 0.55550698  | 0.56367404  | 0.57142145 | 0.5788657   | 0.58590289 | 0.59265171 | 0.59916342 | 0.60551197 | 0.61094788 | 0.61625384 |
| Southeast Sulawesi      | 0.47301416 | 0.47752407 | 0.4823181  | 0.48736429 | 0.49261118 | 0.49823063 | 0.50458344 | 0.51183548 | 0.52030102 | 0.52930955 | 0.53805543 | 0.54740529 | 0.55647391  | 0.56510272  | 0.57318621 | 0.58073033  | 0.5875894  | 0.59394341 | 0.59997204 | 0.60579632 | 0.61061776 | 0.61532587 |
| North Sulawesi          | 0.54363949 | 0.5456523  | 0.54751292 | 0.54952838 | 0.55169202 | 0.55419005 | 0.5571767  | 0.56115905 | 0.56628305 | 0.572370   |            |            |             |             |            |             |            |            |            |            |            |            |



|                           |            |            |            |              |            |            |            |            |             |            |            |            |            |            |            |            |            |            |            |            |            |            |
|---------------------------|------------|------------|------------|--------------|------------|------------|------------|------------|-------------|------------|------------|------------|------------|------------|------------|------------|------------|------------|------------|------------|------------|------------|
| Bakidnon                  | 0.44007909 | 0.44233074 | 0.44411197 | 0.44578894   | 0.44744354 | 0.44882422 | 0.45049022 | 0.45275917 | 0.455664395 | 0.45905516 | 0.46362638 | 0.46930827 | 0.47618836 | 0.48368451 | 0.49175506 | 0.50024768 | 0.50900102 | 0.51791313 | 0.52695322 | 0.53596388 | 0.5432682  | 0.55051685 |
| Bulacan                   | 0.59879603 | 0.60152106 | 0.6040156  | 0.60653658   | 0.60925856 | 0.61188916 | 0.61489421 | 0.61805779 | 0.62258289  | 0.62685917 | 0.63197561 | 0.63774941 | 0.64430353 | 0.65124647 | 0.65846391 | 0.66588607 | 0.67339665 | 0.68099464 | 0.68845606 | 0.69588286 | 0.70165408 | 0.70752022 |
| Cagayan                   | 0.51849825 | 0.52122083 | 0.52350087 | 0.52566949   | 0.52794402 | 0.53001031 | 0.53266144 | 0.53570295 | 0.53926258  | 0.54397672 | 0.54930861 | 0.5565774  | 0.56297305 | 0.57088411 | 0.57924451 | 0.58780075 | 0.59653005 | 0.6051487  | 0.61370978 | 0.6220333  | 0.62860478 | 0.63506809 |
| Camarines Norte           | 0.48628166 | 0.48777903 | 0.48886074 | 0.48987663   | 0.49124432 | 0.49261278 | 0.49456887 | 0.49740224 | 0.50092203  | 0.50481171 | 0.50969936 | 0.51547939 | 0.52234028 | 0.52981666 | 0.53781891 | 0.54612331 | 0.55462317 | 0.56323271 | 0.57186191 | 0.58049559 | 0.58738351 | 0.59428649 |
| Camarines Sur             | 0.52388328 | 0.52629929 | 0.52836034 | 0.53035073   | 0.5323433  | 0.53412759 | 0.53627212 | 0.53913326 | 0.54268436  | 0.54657535 | 0.55142964 | 0.5570564  | 0.56363917 | 0.57079921 | 0.57846816 | 0.58641963 | 0.59457897 | 0.60282115 | 0.61107904 | 0.61929616 | 0.62586626 | 0.63254564 |
| Camiguin                  | 0.52257327 | 0.5241482  | 0.52565588 | 0.52698641   | 0.52906275 | 0.53142481 | 0.5345077  | 0.53852345 | 0.54321424  | 0.54787944 | 0.55338061 | 0.55942911 | 0.56627343 | 0.57367671 | 0.581441   | 0.58933593 | 0.59733393 | 0.60531239 | 0.61318479 | 0.62090381 | 0.62657239 | 0.6324379  |
| Capiz                     | 0.46102131 | 0.46249156 | 0.46348009 | 0.4644371    | 0.46564337 | 0.46696233 | 0.46822757 | 0.47060478 | 0.47382466  | 0.47749504 | 0.4822294  | 0.48802417 | 0.49494841 | 0.50238271 | 0.51040366 | 0.51882531 | 0.52752021 | 0.53634523 | 0.54517963 | 0.55396279 | 0.56102037 | 0.56808796 |
| Catanduanes               | 0.50091321 | 0.50289905 | 0.50440134 | 0.50578591   | 0.50712867 | 0.50809942 | 0.50927829 | 0.51096617 | 0.51320001  | 0.51608385 | 0.52020463 | 0.525721   | 0.53265367 | 0.54034958 | 0.54878823 | 0.55761777 | 0.56667033 | 0.57585695 | 0.58513414 | 0.59443609 | 0.60201223 | 0.60947869 |
| Cavite                    | 0.63294777 | 0.63448097 | 0.63585756 | 0.63735987   | 0.63907192 | 0.64077745 | 0.6429148  | 0.64573383 | 0.64908738  | 0.65266111 | 0.65713881 | 0.66226784 | 0.66809263 | 0.67431285 | 0.68087015 | 0.68761723 | 0.69457625 | 0.70160767 | 0.70876024 | 0.71579043 | 0.72123057 | 0.72678437 |
| Cebu                      | 0.55642898 | 0.55783064 | 0.55904088 | 0.56034274   | 0.56183908 | 0.56327943 | 0.56518138 | 0.56786317 | 0.57124477  | 0.57495432 | 0.57963133 | 0.58504329 | 0.59131123 | 0.59806908 | 0.60527238 | 0.61281872 | 0.62062354 | 0.62851333 | 0.63637842 | 0.64408431 | 0.65001485 | 0.65607636 |
| Cotabato (North Cotabato) | 0.45617086 | 0.45752333 | 0.45841112 | 0.45918173   | 0.46004843 | 0.46065059 | 0.46165937 | 0.46333898 | 0.46559733  | 0.46834209 | 0.47224272 | 0.47727292 | 0.48351726 | 0.49046199 | 0.49783551 | 0.50597266 | 0.51424832 | 0.52273164 | 0.53134207 | 0.53999565 | 0.54690644 | 0.55377082 |
| Davao de Oro              | 0.42921786 | 0.43083905 | 0.43201518 | 0.4330585    | 0.43417484 | 0.43514979 | 0.43663131 | 0.43889782 | 0.44175208  | 0.44512159 | 0.4496941  | 0.45536184 | 0.46218962 | 0.46966269 | 0.47761347 | 0.48648193 | 0.49431108 | 0.50298274 | 0.51174337 | 0.52052061 | 0.52746244 | 0.53441776 |
| Davao Del Norte           | 0.52212084 | 0.52505647 | 0.52769764 | 0.53031221   | 0.53308924 | 0.53575812 | 0.53881707 | 0.54248804 | 0.54659481  | 0.55097192 | 0.55618365 | 0.56207274 | 0.56883134 | 0.57603195 | 0.58364044 | 0.59155411 | 0.59976688 | 0.60810745 | 0.61643135 | 0.62474055 | 0.63133764 | 0.63810495 |
| Davao Del Sur             | 0.54363175 | 0.5457578  | 0.54757006 | 0.54942521   | 0.55143046 | 0.55347459 | 0.55572609 | 0.55888083 | 0.56263638  | 0.56688136 | 0.57218246 | 0.57839167 | 0.58562196 | 0.59348122 | 0.60187362 | 0.61064279 | 0.61964858 | 0.62867747 | 0.63761483 | 0.64631332 | 0.65316974 | 0.66000147 |
| Davao Occidental          | 0.44086023 | 0.44490754 | 0.44858008 | 0.45211209   | 0.45553339 | 0.4586042  | 0.46190319 | 0.46566822 | 0.4699581   | 0.47488221 | 0.48087414 | 0.48819166 | 0.49678071 | 0.50589731 | 0.51561995 | 0.52661758 | 0.53866598 | 0.54666161 | 0.55498733 | 0.56358474 | 0.57238851 | 0.58128649 |
| Davao Oriental            | 0.42947631 | 0.4324804  | 0.43568961 | 0.43849756   | 0.4412418  | 0.44359074 | 0.44616016 | 0.4493632  | 0.45292752  | 0.45694815 | 0.46194415 | 0.46785605 | 0.47478946 | 0.48230605 | 0.49033515 | 0.49867199 | 0.50717729 | 0.51575039 | 0.52437516 | 0.53298609 | 0.53985027 | 0.54667344 |
| Dinagat Islands           | 0.50715463 | 0.51070535 | 0.51380372 | 0.51672098   | 0.51959612 | 0.52218647 | 0.52500842 | 0.52826576 | 0.53176201  | 0.53548164 | 0.54012138 | 0.54571947 | 0.5523491  | 0.55945463 | 0.56702538 | 0.57490673 | 0.58298046 | 0.59118251 | 0.59934323 | 0.60750915 | 0.61418555 | 0.62078136 |
| Eastern Samar             | 0.38903916 | 0.38967202 | 0.38965407 | 0.38937881   | 0.38922443 | 0.3887952  | 0.38886177 | 0.38983075 | 0.39169623  | 0.39439736 | 0.39851924 | 0.40441011 | 0.41208072 | 0.42047546 | 0.42967434 | 0.43935852 | 0.44929564 | 0.45942445 | 0.46963707 | 0.47979713 | 0.48796383 | 0.49567523 |
| Guimaras                  | 0.49114348 | 0.49370461 | 0.49585227 | 0.49798168   | 0.50056942 | 0.50323377 | 0.50645176 | 0.51053953 | 0.51534873  | 0.52028262 | 0.52601927 | 0.53240545 | 0.53963773 | 0.54731477 | 0.55528574 | 0.56341961 | 0.57161359 | 0.57977664 | 0.58797511 | 0.59620624 | 0.60268828 | 0.60924067 |
| Iligao                    | 0.48872139 | 0.4913429  | 0.49345894 | 0.49540788   | 0.49742238 | 0.49921543 | 0.50131215 | 0.50400927 | 0.50719384  | 0.5107684  | 0.51541552 | 0.52116326 | 0.52797046 | 0.53524472 | 0.54299618 | 0.55103808 | 0.55922049 | 0.56752477 | 0.57579771 | 0.58406663 | 0.59062678 | 0.59712822 |
| Ilocos Norte              | 0.58592588 | 0.58778312 | 0.58939994 | 0.59100477   | 0.59275388 | 0.59441944 | 0.59653541 | 0.59943024 | 0.602955    | 0.60683779 | 0.61166485 | 0.61727603 | 0.62322521 | 0.63059125 | 0.6377458  | 0.64510911 | 0.65258588 | 0.66009091 | 0.66761516 | 0.67507917 | 0.68093679 | 0.68692159 |
| Ilocos Sur                | 0.56252015 | 0.56464872 | 0.56644519 | 0.56822488   | 0.57022958 | 0.57222931 | 0.57470133 | 0.57793142 | 0.58183559  | 0.58606239 | 0.59125395 | 0.59725136 | 0.6041791  | 0.61156802 | 0.61934029 | 0.62730858 | 0.63543429 | 0.64352496 | 0.65156554 | 0.65945628 | 0.66589429 | 0.67227776 |
| Iloilo                    | 0.56335959 | 0.56533871 | 0.5671425  | 0.56892978   | 0.57108015 | 0.57327554 | 0.57599799 | 0.57963491 | 0.58399969  | 0.58863906 | 0.59420191 | 0.60035015 | 0.60725643 | 0.61492778 | 0.62225255 | 0.63002535 | 0.63791008 | 0.64576382 | 0.65349013 | 0.66111503 | 0.66693733 | 0.67291782 |
| Isabela                   | 0.52716772 | 0.52954407 | 0.53154412 | 0.53351323   | 0.53560178 | 0.53752263 | 0.53948475 | 0.54286959 | 0.5464968   | 0.55033601 | 0.55560088 | 0.56135399 | 0.5684623  | 0.57694551 | 0.58648059 | 0.59619152 | 0.60622241 | 0.60847328 | 0.61669159 | 0.62472731 | 0.63140261 | 0.63731965 |
| Kalinga                   | 0.44945356 | 0.45037083 | 0.45168207 | 0.45494912   | 0.4630008  | 0.46646004 | 0.470394   | 0.47513579 | 0.48055517  | 0.4862524  | 0.49299647 | 0.50017572 | 0.50808955 | 0.5163918  | 0.52481059 | 0.53317686 | 0.54148245 | 0.54972099 | 0.55786137 | 0.56590304 | 0.57200229 | 0.57819828 |
| La Union                  | 0.55944715 | 0.56077992 | 0.56181973 | 0.56281121   | 0.56390595 | 0.56468544 | 0.56624375 | 0.56840395 | 0.57124369  | 0.57457037 | 0.57905343 | 0.58454445 | 0.59117864 | 0.59849276 | 0.60641322 | 0.61462270 | 0.62302889 | 0.63144707 | 0.63982786 | 0.64801669 | 0.65451761 | 0.66093636 |
| Laguna                    | 0.60593034 | 0.60716069 | 0.60818691 | 0.60927961   | 0.610613   | 0.61188147 | 0.61362688 | 0.61611386 | 0.61922123  | 0.62262707 | 0.62702988 | 0.63215151 | 0.63814732 | 0.64464003 | 0.6515515  | 0.65882666 | 0.66633926 | 0.67391033 | 0.68153834 | 0.68909832 | 0.69499712 | 0.70092466 |
| Lanao Del Norte           | 0.49081105 | 0.49166191 | 0.49199088 | 0.49216804   | 0.49235395 | 0.49223712 | 0.49246926 | 0.49335385 | 0.49493157  | 0.49709516 | 0.50042609 | 0.50507825 | 0.5110446  | 0.5177011  | 0.52514132 | 0.5331415  | 0.54157525 | 0.55027829 | 0.55915655 | 0.56804898 | 0.57530936 | 0.58250552 |
| Lanao Del Sur             | 0.4270541  | 0.42796934 | 0.42834406 | 0.42863386   | 0.42914705 | 0.42953723 | 0.43047656 | 0.43224423 | 0.43479719  | 0.4380233  | 0.44249021 | 0.44817248 | 0.45507745 | 0.46267006 | 0.47093111 | 0.47958677 | 0.48849782 | 0.49755357 | 0.50672528 | 0.51590961 | 0.52529783 | 0.53070277 |
| Leyte                     | 0.49216187 | 0.49451497 | 0.49651534 | 0.49847772   | 0.50066122 | 0.50277523 | 0.5053147  | 0.50858904 | 0.51252135  | 0.51695936 | 0.52254593 | 0.52905307 | 0.53666957 | 0.54494778 | 0.55365192 | 0.56248618 | 0.57140471 | 0.58023973 | 0.58889864 | 0.5974381  | 0.60416111 | 0.61094256 |
| Maguindano                | 0.3880739  | 0.39102055 | 0.39347961 | 0.39579569   | 0.39824316 | 0.40062091 | 0.40344862 | 0.40702858 | 0.41118786  | 0.41568944 | 0.42121818 | 0.42786739 | 0.43549019 | 0.44362905 | 0.45217335 | 0.46098284 | 0.46993436 | 0.47895129 | 0.48799597 | 0.49699725 | 0.5041702  | 0.51129551 |
| Marinduque                | 0.44780766 | 0.44883518 | 0.44939812 | 0.44982063   | 0.45049874 | 0.45092478 | 0.45178308 | 0.45340269 | 0.45588306  | 0.45897958 | 0.46338761 | 0.46916505 | 0.47638621 | 0.4842276  | 0.4927244  | 0.50158883 | 0.51051274 | 0.51945399 | 0.5284135  | 0.53740949 | 0.54465332 | 0.55186124 |
| Masbate                   | 0.37592122 | 0.37541368 | 0.37428736 | 0.37296442   | 0.37150644 | 0.36959719 | 0.36788461 | 0.36683888 | 0.36655854  | 0.36726094 | 0.36942342 | 0.37347963 | 0.37934986 | 0.38599463 | 0.39366559 | 0.40206283 | 0.41091618 | 0.42009045 | 0.42946856 | 0.43896097 | 0.44664412 | 0.45418089 |
| Misamis Occidental        | 0.49877893 | 0.49865014 | 0.49814921 | 0.49755264   | 0.49727484 | 0.49699739 | 0.49728091 | 0.4983823  | 0.50021354  | 0.50260102 | 0.50617145 | 0.51100583 | 0.51714556 | 0.52399352 | 0.5314557  | 0.53933911 | 0.54751223 | 0.55582144 | 0.56412563 | 0.57247424 | 0.57908862 | 0.5857211  |
| Misamis Oriental          | 0.57111426 | 0.57225796 | 0.5730367  | 0.57382625   | 0.57471239 | 0.5754302  | 0.57656557 | 0.57831873 | 0.58056242  | 0.5831552  | 0.58674428 | 0.59127318 | 0.59683424 | 0.60203059 | 0.60799533 | 0.61470422 | 0.62246015 | 0.63232768 | 0.64012107 | 0.64791731 | 0.65403382 | 0.66020522 |
| Mountain Province         | 0.42356174 | 0.42441576 | 0.42454524 | 0.42480025   | 0.42406488 | 0.42328321 | 0.4227177  | 0.42292593 | 0.42413562  | 0.42630628 | 0.42974588 | 0.4345494  | 0.4407264  | 0.44768079 | 0.4557203  | 0.46462027 | 0.47396115 | 0.48380356 | 0.49393712 | 0.50417424 | 0.51254507 | 0.52052229 |
| National Capital Region   | 0.65400632 | 0.65633226 | 0.6579052  | 0.65951263</ |            |            |            |            |             |            |            |            |            |            |            |            |            |            |            |            |            |            |



|                                          |            |            |            |            |            |            |             |            |            |            |            |            |            |            |            |            |            |            |            |            |            |            |
|------------------------------------------|------------|------------|------------|------------|------------|------------|-------------|------------|------------|------------|------------|------------|------------|------------|------------|------------|------------|------------|------------|------------|------------|------------|
| Tawi-Tawi                                | 0.40929984 | 0.41157424 | 0.41341358 | 0.41516651 | 0.41741326 | 0.41987784 | 0.423111573 | 0.42740368 | 0.43242302 | 0.43773004 | 0.44409331 | 0.45122105 | 0.45920788 | 0.46764062 | 0.47641084 | 0.48541296 | 0.49452887 | 0.503662   | 0.51277405 | 0.5218073  | 0.52879969 | 0.53581204 |
| Zambales                                 | 0.55972225 | 0.5565431  | 0.55686696 | 0.55729537 | 0.55793563 | 0.55849005 | 0.55952704  | 0.56136711 | 0.5638859  | 0.56693501 | 0.57114626 | 0.57629563 | 0.5824457  | 0.58924208 | 0.59668824 | 0.60453675 | 0.61268794 | 0.62098829 | 0.62934206 | 0.63767085 | 0.64428687 | 0.6508406  |
| Zamboanga Del Norte                      | 0.43045888 | 0.43208335 | 0.43328012 | 0.43439178 | 0.43571821 | 0.43769501 | 0.43863676  | 0.44107476 | 0.44419401 | 0.44776552 | 0.45248309 | 0.45824558 | 0.46512348 | 0.47261233 | 0.48056532 | 0.48883426 | 0.49731943 | 0.5059329  | 0.51465801 | 0.52334977 | 0.53029097 | 0.53718454 |
| Zamboanga Del Sur                        | 0.51488974 | 0.51750465 | 0.51983278 | 0.52216686 | 0.52474886 | 0.52732015 | 0.53031595  | 0.53407927 | 0.53841831 | 0.54300328 | 0.54854317 | 0.55477975 | 0.56181956 | 0.56936313 | 0.5772568  | 0.58539659 | 0.59366976 | 0.60194062 | 0.61015045 | 0.61826857 | 0.62455206 | 0.63090878 |
| Zamboanga Sibugay                        | 0.429073   | 0.431565   | 0.43365052 | 0.43562788 | 0.43789889 | 0.44008967 | 0.44280836  | 0.44640623 | 0.45067228 | 0.45528606 | 0.46094767 | 0.46752674 | 0.47518019 | 0.48339369 | 0.49195798 | 0.50077071 | 0.50982053 | 0.51831286 | 0.52707055 | 0.53581192 | 0.54274036 | 0.54969602 |
| Seychelles                               | 0.65155199 | 0.65649607 | 0.66090779 | 0.66416203 | 0.66646135 | 0.66926474 | 0.67214991  | 0.67507744 | 0.67695905 | 0.67784703 | 0.68016364 | 0.68368149 | 0.68762939 | 0.69252573 | 0.69711459 | 0.70172282 | 0.70618362 | 0.71102278 | 0.71640782 | 0.72207368 | 0.72666377 | 0.73015077 |
| Sri Lanka                                | 0.58294264 | 0.5875566  | 0.59232593 | 0.59741028 | 0.60225006 | 0.60690666 | 0.61180708  | 0.61697927 | 0.62244132 | 0.62814963 | 0.63426312 | 0.64079957 | 0.64804982 | 0.65543584 | 0.66278243 | 0.66976029 | 0.67627744 | 0.68240527 | 0.68812586 | 0.69351606 | 0.69764854 | 0.70153494 |
| Thailand                                 | 0.58350092 | 0.58766156 | 0.59175191 | 0.59604892 | 0.60052067 | 0.60540078 | 0.61035668  | 0.61636859 | 0.62106754 | 0.62432907 | 0.62858944 | 0.63322673 | 0.63841097 | 0.64367292 | 0.64877206 | 0.65401562 | 0.6593693  | 0.66480413 | 0.67022559 | 0.6752739  | 0.67911999 | 0.68254793 |
| Timor-Leste                              | 0.34379365 | 0.34949032 | 0.35416202 | 0.35844003 | 0.362688   | 0.36691358 | 0.37065409  | 0.37539077 | 0.38122753 | 0.38794482 | 0.39488702 | 0.40187236 | 0.4089103  | 0.41521788 | 0.42141554 | 0.42638362 | 0.43120277 | 0.43451973 | 0.43701866 | 0.44019585 | 0.44234934 | 0.44466762 |
| Viet Nam                                 | 0.48980205 | 0.49763035 | 0.50545345 | 0.51336751 | 0.52122939 | 0.52895633 | 0.53630065  | 0.54334265 | 0.55012712 | 0.55645594 | 0.56276857 | 0.56894546 | 0.57507867 | 0.58102921 | 0.58691381 | 0.59284957 | 0.59884949 | 0.60501942 | 0.61135141 | 0.61773382 | 0.62390932 | 0.62793372 |
| Sub-Saharan Africa                       | 0.33090196 | 0.33496328 | 0.33935347 | 0.34403438 | 0.34924842 | 0.35502181 | 0.36107404  | 0.36756161 | 0.37410063 | 0.38055519 | 0.38731002 | 0.39412176 | 0.40091964 | 0.40775813 | 0.41467049 | 0.42143301 | 0.42788659 | 0.43425414 | 0.4406728  | 0.44717187 | 0.45311872 | 0.4585873  |
| Central sub-Saharan Africa               | 0.32084148 | 0.32374919 | 0.3275669  | 0.33193465 | 0.33742002 | 0.34409927 | 0.35145974  | 0.35956551 | 0.36848818 | 0.37666929 | 0.38538095 | 0.39469176 | 0.40423388 | 0.41352221 | 0.42257865 | 0.43098753 | 0.43874592 | 0.44617858 | 0.45324977 | 0.46015956 | 0.46645637 | 0.47225565 |
| Angola                                   | 0.30760331 | 0.31169753 | 0.31670657 | 0.32177736 | 0.32739527 | 0.33378519 | 0.34101262  | 0.34884684 | 0.35708201 | 0.36440774 | 0.37203354 | 0.38000661 | 0.38789186 | 0.39576309 | 0.40370299 | 0.41137203 | 0.41882206 | 0.42617708 | 0.43335501 | 0.4404546  | 0.44728399 | 0.45372195 |
| Central African Republic                 | 0.24602113 | 0.24924674 | 0.25252437 | 0.25510152 | 0.25777878 | 0.26045192 | 0.26371245  | 0.26732139 | 0.27115812 | 0.27533852 | 0.27998138 | 0.28509725 | 0.29046002 | 0.2960493  | 0.2999995  | 0.30082787 | 0.30245304 | 0.30475224 | 0.30801122 | 0.30915306 | 0.3084263  | 0.30916769 |
| Congo (Brazzaville)                      | 0.46076481 | 0.46375168 | 0.46703727 | 0.47013437 | 0.47361244 | 0.47813763 | 0.48335582  | 0.48764074 | 0.49282885 | 0.49829997 | 0.5054285  | 0.51381578 | 0.52292828 | 0.53155168 | 0.54059449 | 0.54841403 | 0.55510861 | 0.56183841 | 0.56779397 | 0.57337367 | 0.57845155 | 0.58307524 |
| DR Congo                                 | 0.26245675 | 0.2578575  | 0.25413636 | 0.25233388 | 0.25247092 | 0.25416102 | 0.25735512  | 0.26227227 | 0.26810387 | 0.27436114 | 0.28223275 | 0.29087295 | 0.30045478 | 0.31083126 | 0.32162293 | 0.33242131 | 0.34198879 | 0.35110204 | 0.36028768 | 0.36934068 | 0.37671227 | 0.38317985 |
| Equatorial Guinea                        | 0.41138345 | 0.43359006 | 0.451399   | 0.46784683 | 0.48387961 | 0.49868372 | 0.51157983  | 0.52407646 | 0.53701889 | 0.54851468 | 0.55910938 | 0.57027242 | 0.5818339  | 0.59280061 | 0.60373177 | 0.61313462 | 0.62185816 | 0.63023454 | 0.63802822 | 0.64530309 | 0.6521249  | 0.65785746 |
| Gabon                                    | 0.50913309 | 0.51304571 | 0.51691762 | 0.52105141 | 0.52547907 | 0.53048857 | 0.53479772  | 0.53944142 | 0.54411089 | 0.5489132  | 0.55402271 | 0.56023208 | 0.56684296 | 0.57380813 | 0.58091566 | 0.588365   | 0.5960623  | 0.60381625 | 0.61172438 | 0.61990473 | 0.62760965 | 0.63469139 |
| Eastern sub-Saharan Africa               | 0.26416531 | 0.26877226 | 0.27348445 | 0.27843367 | 0.28393661 | 0.28997039 | 0.29645526  | 0.30357591 | 0.3109185  | 0.31845677 | 0.32629597 | 0.3342534  | 0.34162808 | 0.3492073  | 0.35700952 | 0.36490704 | 0.37275883 | 0.38049999 | 0.38835511 | 0.39634466 | 0.40348021 | 0.40972098 |
| Burundi                                  | 0.21686986 | 0.21698873 | 0.21778248 | 0.21896154 | 0.22091871 | 0.22308437 | 0.22582189  | 0.22896882 | 0.2328555  | 0.23694304 | 0.24144779 | 0.24627728 | 0.2515723  | 0.25719136 | 0.26279472 | 0.26732794 | 0.27158785 | 0.2754045  | 0.27973329 | 0.28344251 | 0.286496   | 0.28937436 |
| Comoros                                  | 0.35187551 | 0.359212   | 0.36644613 | 0.37341057 | 0.38003598 | 0.38689184 | 0.39352143  | 0.39905109 | 0.40469746 | 0.41025358 | 0.41545338 | 0.42109297 | 0.42672996 | 0.43278993 | 0.43884451 | 0.44471239 | 0.45050698 | 0.45628084 | 0.46195134 | 0.46738801 | 0.47200313 | 0.47597869 |
| Djibouti                                 | 0.36901509 | 0.37285316 | 0.37665    | 0.38066662 | 0.38498771 | 0.38956871 | 0.39503747  | 0.40061855 | 0.40636583 | 0.41196933 | 0.41699935 | 0.42231614 | 0.42771144 | 0.43336044 | 0.43945572 | 0.44585828 | 0.45344285 | 0.46044015 | 0.46770567 | 0.47526234 | 0.48187995 | 0.48795837 |
| Eritrea                                  | 0.31024816 | 0.31727499 | 0.32356658 | 0.32859358 | 0.33287938 | 0.33668251 | 0.33983582  | 0.34284317 | 0.34543278 | 0.34814774 | 0.34814618 | 0.35416315 | 0.36011275 | 0.36434365 | 0.37252759 | 0.37693516 | 0.38217167 | 0.38593603 | 0.39115488 | 0.39633056 | 0.40045941 | 0.40386394 |
| Ethiopia                                 | 0.17341853 | 0.17897297 | 0.18413801 | 0.18869481 | 0.1950307  | 0.20286824 | 0.21152423  | 0.21819393 | 0.22528719 | 0.2426582  | 0.25081416 | 0.26788086 | 0.27900696 | 0.28988527 | 0.30048485 | 0.31073642 | 0.32043187 | 0.32946923 | 0.33805007 | 0.34642266 | 0.35321365 | 0.3588233  |
| Addis Ababa                              | 0.54939268 | 0.55421661 | 0.56043045 | 0.56431784 | 0.56943151 | 0.57550788 | 0.58179341  | 0.58915693 | 0.59692114 | 0.60489866 | 0.61329088 | 0.62176334 | 0.62952179 | 0.63741593 | 0.64555244 | 0.65380755 | 0.66170684 | 0.66940403 | 0.67681666 | 0.68417585 | 0.68996669 | 0.6947296  |
| Afar                                     | 0.11480189 | 0.11905238 | 0.12278245 | 0.12576246 | 0.13060772 | 0.13697002 | 0.14420382  | 0.15310516 | 0.16278367 | 0.17290444 | 0.18356445 | 0.19430056 | 0.2046402  | 0.21490464 | 0.22512542 | 0.23547524 | 0.24550845 | 0.25517861 | 0.26462211 | 0.27398706 | 0.28194644 | 0.28877341 |
| Amhara                                   | 0.11932173 | 0.12553943 | 0.13127208 | 0.13619058 | 0.14324911 | 0.15213541 | 0.16209293  | 0.17382063 | 0.18639691 | 0.19927525 | 0.2126035  | 0.22578478 | 0.23979806 | 0.25461776 | 0.26904172 | 0.27122065 | 0.28187033 | 0.29117117 | 0.29993476 | 0.30840144 | 0.31505898 | 0.32045319 |
| Benishangul-Gumuz                        | 0.10818158 | 0.11363627 | 0.11849202 | 0.12246567 | 0.12882057 | 0.137216   | 0.14690757  | 0.15884862 | 0.17184181 | 0.18538265 | 0.19953234 | 0.21347031 | 0.22643598 | 0.23921067 | 0.25166825 | 0.26378196 | 0.27530219 | 0.28602094 | 0.29611152 | 0.30580875 | 0.31370507 | 0.32022848 |
| Dire Dawa                                | 0.36228323 | 0.3682846  | 0.37345748 | 0.3777916  | 0.38340132 | 0.39013703 | 0.39752568  | 0.40621972 | 0.41557533 | 0.42532002 | 0.43564887 | 0.4458478  | 0.45562    | 0.46568671 | 0.47595852 | 0.48634401 | 0.49651842 | 0.50638749 | 0.51601433 | 0.52556768 | 0.53366763 | 0.54066685 |
| Gambella                                 | 0.21745483 | 0.22461352 | 0.23119634 | 0.23711931 | 0.24538736 | 0.2555678  | 0.26698988  | 0.28069613 | 0.2958801  | 0.31103477 | 0.32707721 | 0.34285349 | 0.35748561 | 0.37176026 | 0.38576422 | 0.39934786 | 0.41203614 | 0.4234045  | 0.43390134 | 0.44395416 | 0.4518667  | 0.45822008 |
| Harari                                   | 0.36060537 | 0.36532529 | 0.36946047 | 0.3729444  | 0.37798011 | 0.3843402  | 0.39140154  | 0.39987955 | 0.40999223 | 0.41866488 | 0.42869506 | 0.43878276 | 0.44832266 | 0.45822213 | 0.46856024 | 0.47925971 | 0.49003538 | 0.50059889 | 0.51105614 | 0.5214891  | 0.53044876 | 0.53816876 |
| Oromia                                   | 0.14476873 | 0.14986690 | 0.15453324 | 0.15856473 | 0.16460966 | 0.17231514 | 0.18092932  | 0.19136077 | 0.20263326 | 0.21427913 | 0.22683323 | 0.23858833 | 0.25029045 | 0.26190747 | 0.27326951 | 0.28418588 | 0.29455197 | 0.30429946 | 0.313416   | 0.32234769 | 0.32969397 | 0.33581502 |
| Somali                                   | 0.10517341 | 0.10876118 | 0.1119455  | 0.11450819 | 0.1187302  | 0.12439919 | 0.13091725  | 0.1390476  | 0.14804035 | 0.15750725 | 0.1676664  | 0.17888091 | 0.18700065 | 0.19775066 | 0.20760707 | 0.21752944 | 0.2270536  | 0.23620899 | 0.24514346 | 0.25402577 | 0.26165225 | 0.26825381 |
| Southern Nations, Nationalities, and Peo | 0.15273481 | 0.15831281 | 0.16324994 | 0.16782194 | 0.17364111 | 0.1819693  | 0.19136959  | 0.20285632 | 0.21523697 | 0.22804416 | 0.24140239 | 0.25472511 | 0.2672688  | 0.27940218 | 0.29102727 | 0.30325607 | 0.31306423 | 0.32310623 | 0.33260584 | 0.34181741 | 0.34933889 | 0.35552153 |
| Tigray                                   | 0.16787049 | 0.17469034 | 0.18183818 | 0.18762319 | 0.19572268 | 0.20558104 | 0.2164032   | 0.22904742 | 0.24256363 | 0.25637622 | 0.27021671 | 0.28424249 | 0.297572   | 0.3077623  | 0.31943002 | 0.33072634 | 0.34133269 | 0.3511351  | 0.36033055 | 0.36922325 | 0.37634669 | 0.38218351 |
| Kenya                                    | 0.38239562 | 0.38618841 | 0.38986266 | 0.39368048 | 0.39774365 | 0.40244401 | 0.40774576  | 0.41373623 | 0.41973815 | 0.42612389 | 0.43303584 | 0.44089383 | 0.4486664  | 0.45666694 | 0.4647243  | 0.47308405 | 0.48179007 | 0.49022662 | 0.49910122 | 0.50800421 | 0.51613657 | 0.52376808 |
| Baringo                                  | 0.36026177 | 0.3677072  | 0.37499069 | 0.38210732 | 0.3899514  |            |             |            |            |            |            |            |            |            |            |            |            |            |            |            |            |            |

|                             |            |            |            |            |            |            |            |            |            |            |            |            |            |            |            |            |            |            |            |             |            |            |
|-----------------------------|------------|------------|------------|------------|------------|------------|------------|------------|------------|------------|------------|------------|------------|------------|------------|------------|------------|------------|------------|-------------|------------|------------|
| Migori                      | 0.2635732  | 0.26982946 | 0.27590578 | 0.28214766 | 0.28865359 | 0.29585831 | 0.30346298 | 0.31174422 | 0.32031054 | 0.32946746 | 0.33942096 | 0.3498345  | 0.36078118 | 0.37213835 | 0.38367253 | 0.39571105 | 0.40839196 | 0.42127645 | 0.43443386 | 0.44776645  | 0.46078865 | 0.47280371 |
| Mombasa                     | 0.45100524 | 0.45442197 | 0.45770631 | 0.46099166 | 0.46427292 | 0.46924643 | 0.47486824 | 0.48158893 | 0.48845054 | 0.4956237  | 0.50364394 | 0.51213761 | 0.52080746 | 0.52964475 | 0.53831094 | 0.54705859 | 0.55588246 | 0.56440592 | 0.57302215 | 0.58157873  | 0.58916859 | 0.59683778 |
| Murang'a                    | 0.41632645 | 0.4203242  | 0.42420926 | 0.42818837 | 0.43238445 | 0.43706301 | 0.44220975 | 0.44799778 | 0.45371495 | 0.45978679 | 0.46661773 | 0.47378175 | 0.48096035 | 0.48830174 | 0.49563739 | 0.50333779 | 0.51132457 | 0.51902522 | 0.52766449 | 0.53594549  | 0.54357788 | 0.55086949 |
| Nairobi                     | 0.55647507 | 0.56066175 | 0.56489862 | 0.56918747 | 0.57360695 | 0.57829753 | 0.58340574 | 0.58906707 | 0.59514319 | 0.60163438 | 0.60837269 | 0.61533231 | 0.62211961 | 0.62934777 | 0.63682346 | 0.64443846 | 0.65219315 | 0.66009733 | 0.66815092 | 0.67636409  | 0.68473789 | 0.69327244 |
| Nakuru                      | 0.40762374 | 0.41232169 | 0.41693325 | 0.42163269 | 0.42699353 | 0.43325419 | 0.44054664 | 0.44879448 | 0.45699148 | 0.46538676 | 0.47440038 | 0.48366594 | 0.49293477 | 0.50219343 | 0.51152128 | 0.52082537 | 0.52929916 | 0.53792534 | 0.54668946 | 0.555616073 | 0.56279661 | 0.5700454  |
| Nandi                       | 0.35473974 | 0.35965211 | 0.36450596 | 0.36924546 | 0.37408417 | 0.37943795 | 0.38518209 | 0.39173747 | 0.39854001 | 0.40581572 | 0.41379656 | 0.42209894 | 0.43072787 | 0.43971352 | 0.44895729 | 0.45857811 | 0.46833688 | 0.47796967 | 0.48774354 | 0.49768713  | 0.50725822 | 0.51627971 |
| Narok                       | 0.27584801 | 0.28025725 | 0.28484091 | 0.29478531 | 0.30108875 | 0.30787153 | 0.31485739 | 0.32228601 | 0.32995789 | 0.33814823 | 0.34707429 | 0.35633481 | 0.36586487 | 0.37565561 | 0.38574137 | 0.39618848 | 0.40679733 | 0.4173734  | 0.42805452 | 0.43882838  | 0.44962915 | 0.45910307 |
| Nyamira                     | 0.41530409 | 0.42038402 | 0.42531827 | 0.43048923 | 0.43613874 | 0.44249102 | 0.44933411 | 0.4569359  | 0.46445611 | 0.47263268 | 0.48133352 | 0.4914672  | 0.50138743 | 0.51158593 | 0.52189969 | 0.53227555 | 0.54299666 | 0.55257876 | 0.56251727 | 0.57232096  | 0.5818467  | 0.58926708 |
| Nyandarua                   | 0.42171721 | 0.4270748  | 0.43250056 | 0.43811961 | 0.4438892  | 0.45013407 | 0.45703348 | 0.46449859 | 0.47175062 | 0.47923949 | 0.48725052 | 0.49545696 | 0.50355318 | 0.51173563 | 0.51983166 | 0.52815573 | 0.53657032 | 0.54478966 | 0.55310811 | 0.56141338  | 0.56980929 | 0.57610986 |
| Nyeri                       | 0.44935217 | 0.45246709 | 0.45554338 | 0.45871321 | 0.46239312 | 0.46694089 | 0.4722988  | 0.47860757 | 0.48490753 | 0.49146844 | 0.49837353 | 0.50623899 | 0.51363901 | 0.52107548 | 0.52842408 | 0.53589522 | 0.54344866 | 0.55077546 | 0.5582799  | 0.5658029   | 0.57243095 | 0.57878748 |
| Samburu                     | 0.24070063 | 0.24433472 | 0.24879835 | 0.25169334 | 0.2555988  | 0.26005399 | 0.26492789 | 0.27031853 | 0.2757377  | 0.28167267 | 0.28823706 | 0.29515973 | 0.30237877 | 0.30988598 | 0.31759035 | 0.32583984 | 0.3346449  | 0.3430872  | 0.35205085 | 0.3612377   | 0.37000448 | 0.37832124 |
| Siaya                       | 0.28932821 | 0.29424968 | 0.29897473 | 0.30382325 | 0.30918423 | 0.31546086 | 0.32247835 | 0.33029095 | 0.3382463  | 0.34683951 | 0.35642434 | 0.36663269 | 0.37725414 | 0.38813675 | 0.39915091 | 0.41029717 | 0.42171914 | 0.4336226  | 0.4451682  | 0.4571235   | 0.46663229 | 0.4765244  |
| Taita Taveta                | 0.38979897 | 0.39355252 | 0.39721597 | 0.40092075 | 0.40492704 | 0.40959221 | 0.41515821 | 0.42170599 | 0.42840666 | 0.43544198 | 0.44333336 | 0.45173013 | 0.4603975  | 0.46926755 | 0.47844447 | 0.48726442 | 0.49656209 | 0.50571619 | 0.51498696 | 0.52426494  | 0.53276871 | 0.54098908 |
| Tana River                  | 0.25568915 | 0.26049831 | 0.25728434 | 0.25805222 | 0.25922065 | 0.26126131 | 0.26432605 | 0.26838592 | 0.27277766 | 0.27783552 | 0.28403486 | 0.2910988  | 0.29868733 | 0.3069085  | 0.3154006  | 0.32450322 | 0.33402448 | 0.34367519 | 0.35352483 | 0.36355944  | 0.3745301  | 0.38284535 |
| Tharaka Nithi               | 0.36689183 | 0.37162648 | 0.37651194 | 0.38163932 | 0.38692483 | 0.4003186  | 0.4074344  | 0.41482035 | 0.42269232 | 0.4314317  | 0.44095571 | 0.45878203 | 0.46793069 | 0.47715169 | 0.48683513 | 0.4953951  | 0.50354461 | 0.51134924 | 0.52178907 | 0.53246811  | 0.54296801 | 0.55296811 |
| Trans Nzoia                 | 0.3844205  | 0.38957093 | 0.39475898 | 0.4002202  | 0.40589607 | 0.41198674 | 0.41846072 | 0.42554918 | 0.43267935 | 0.44011034 | 0.44818471 | 0.45662743 | 0.46527019 | 0.47408703 | 0.48301679 | 0.49231628 | 0.50189977 | 0.51136886 | 0.52104663 | 0.53097554  | 0.53986969 | 0.54850455 |
| Turkana                     | 0.22786553 | 0.23281878 | 0.23728846 | 0.24207306 | 0.24684801 | 0.2519513  | 0.25732239 | 0.26312162 | 0.26895789 | 0.27534796 | 0.28235337 | 0.2901888  | 0.29890817 | 0.30628331 | 0.31471534 | 0.32341465 | 0.33228026 | 0.34097037 | 0.34958168 | 0.35797862  | 0.36591471 | 0.37343424 |
| Uasin Gishu                 | 0.40964379 | 0.41485127 | 0.4201437  | 0.4256286  | 0.43129544 | 0.43744848 | 0.44400576 | 0.4510338  | 0.45793381 | 0.46514626 | 0.47296452 | 0.48106746 | 0.48936919 | 0.49784053 | 0.50638642 | 0.51517421 | 0.52411778 | 0.53296834 | 0.54195286 | 0.55096959  | 0.55934577 | 0.56735459 |
| Vihiga                      | 0.3611816  | 0.36723014 | 0.37308259 | 0.3788441  | 0.38468248 | 0.39112676 | 0.39806668 | 0.40559811 | 0.4128218  | 0.42027675 | 0.42848862 | 0.43693298 | 0.44545206 | 0.45414737 | 0.46287273 | 0.47145079 | 0.48042863 | 0.48925912 | 0.49820909 | 0.50720557  | 0.51532506 | 0.52308979 |
| Wajir                       | 0.14435906 | 0.14763667 | 0.15106587 | 0.15466526 | 0.15847489 | 0.16259706 | 0.16714514 | 0.17210837 | 0.17713011 | 0.18244053 | 0.18821    | 0.19427243 | 0.20030946 | 0.20634144 | 0.21229647 | 0.21821194 | 0.2240721  | 0.22976103 | 0.23551673 | 0.24129824  | 0.24676802 | 0.25205011 |
| West Pokot                  | 0.27246151 | 0.27780292 | 0.28321097 | 0.28880577 | 0.29463593 | 0.30113574 | 0.30798146 | 0.31536315 | 0.32274818 | 0.3305135  | 0.33896688 | 0.34782901 | 0.35706252 | 0.36657439 | 0.37624551 | 0.3861947  | 0.39626539 | 0.40613952 | 0.41605866 | 0.42600268  | 0.43532573 | 0.44412029 |
| Madagascar                  | 0.28319072 | 0.28566818 | 0.28715315 | 0.28967546 | 0.29262988 | 0.29591933 | 0.29972339 | 0.30402624 | 0.30899026 | 0.31345089 | 0.31835318 | 0.32380104 | 0.32994754 | 0.33651923 | 0.34335261 | 0.3504436  | 0.35802634 | 0.36623559 | 0.37496964 | 0.3842092   | 0.39277871 | 0.40024694 |
| Malawi                      | 0.23090081 | 0.23402051 | 0.23760216 | 0.24155923 | 0.24643454 | 0.25167232 | 0.25759565 | 0.26322693 | 0.27368986 | 0.28229651 | 0.29117962 | 0.30044851 | 0.30919762 | 0.31793621 | 0.32704263 | 0.33614014 | 0.34473154 | 0.35312107 | 0.36147041 | 0.37011461  | 0.37787902 | 0.38455363 |
| Mozambique                  | 0.1985344  | 0.20242192 | 0.20639006 | 0.21054449 | 0.21497246 | 0.21969237 | 0.22475809 | 0.23015823 | 0.23570197 | 0.24136066 | 0.247151   | 0.25252347 | 0.25831556 | 0.26528046 | 0.27289821 | 0.28103269 | 0.28915242 | 0.29716477 | 0.30522677 | 0.31317451  | 0.32091118 | 0.32862461 |
| Rwanda                      | 0.28098345 | 0.28680205 | 0.29295543 | 0.29967692 | 0.30694392 | 0.31421958 | 0.32199852 | 0.32961659 | 0.33730323 | 0.34494463 | 0.35165942 | 0.35894034 | 0.36641182 | 0.37376968 | 0.38133138 | 0.38899541 | 0.39828796 | 0.40641147 | 0.41465791 | 0.42308673  | 0.4298966  | 0.43588871 |
| Senegal                     | 0.05584206 | 0.06664316 | 0.05745761 | 0.05827215 | 0.05907695 | 0.05989854 | 0.06074148 | 0.06159815 | 0.06247539 | 0.06338223 | 0.06433213 | 0.06530681 | 0.06635488 | 0.06745949 | 0.06860493 | 0.06981152 | 0.07106405 | 0.07234378 | 0.07364225 | 0.07497981  | 0.07636337 | 0.07768811 |
| South Sudan                 | 0.23173034 | 0.23501413 | 0.23834119 | 0.24179719 | 0.2454625  | 0.2492809  | 0.25330051 | 0.25749176 | 0.26174046 | 0.26617923 | 0.27057202 | 0.27471914 | 0.27906664 | 0.28381394 | 0.28913363 | 0.29445459 | 0.29972441 | 0.30504386 | 0.31041382 | 0.31584222  | 0.32133073 | 0.32687913 |
| Uganda                      | 0.23432323 | 0.24218639 | 0.25055239 | 0.25916488 | 0.26800461 | 0.27736919 | 0.28703058 | 0.29674042 | 0.30674884 | 0.31673115 | 0.32654366 | 0.33621772 | 0.34583452 | 0.35438162 | 0.3634309  | 0.37253799 | 0.38131223 | 0.39008226 | 0.39911778 | 0.40843156  | 0.41684608 | 0.42326118 |
| Tanzania                    | 0.29182726 | 0.29671565 | 0.301984   | 0.30761549 | 0.31377298 | 0.32043734 | 0.327234   | 0.33431324 | 0.34135263 | 0.34837803 | 0.35556756 | 0.36303632 | 0.37041249 | 0.37796317 | 0.38597458 | 0.39427776 | 0.40287931 | 0.41182497 | 0.42098536 | 0.43022538  | 0.43874724 | 0.44656827 |
| Zambia                      | 0.32062532 | 0.32440317 | 0.32868012 | 0.3337214  | 0.33948992 | 0.34604886 | 0.35354071 | 0.36245097 | 0.3716885  | 0.38166712 | 0.39247099 | 0.40437563 | 0.4145745  | 0.4254923  | 0.43624401 | 0.44674472 | 0.4571226  | 0.46753263 | 0.47878771 | 0.48791152  | 0.49748556 | 0.50594895 |
| Southern sub-Saharan Africa | 0.55849062 | 0.56251127 | 0.56604984 | 0.56921519 | 0.5723897  | 0.57611569 | 0.58068483 | 0.585673   | 0.59040532 | 0.59458507 | 0.59883555 | 0.60334685 | 0.60803777 | 0.61284381 | 0.61745259 | 0.62183758 | 0.62591906 | 0.6297615  | 0.6341066  | 0.63894919  | 0.64398183 | 0.64922008 |
| Botswana                    | 0.51349822 | 0.51730178 | 0.52292396 | 0.53700018 | 0.5443922  | 0.55170697 | 0.55922162 | 0.5667025  | 0.57388381 | 0.5796941  | 0.58582415 | 0.59198546 | 0.59773955 | 0.60406473 | 0.61008605 | 0.61541112 | 0.62079757 | 0.62570495 | 0.63060684 | 0.63532409  | 0.6392753  | 0.64271263 |
| Eswatini                    | 0.47185284 | 0.47723337 | 0.48247442 | 0.48760883 | 0.49266916 | 0.49804385 | 0.50365829 | 0.50926022 | 0.5147309  | 0.5204274  | 0.5262458  | 0.53191391 | 0.53779802 | 0.54383642 | 0.54961385 | 0.55537374 | 0.56106119 | 0.56669849 | 0.57215481 | 0.57720631  | 0.58165307 | 0.58545971 |
| Lesotho                     | 0.3986358  | 0.40099103 | 0.40902166 | 0.41398257 | 0.41867092 | 0.42321123 | 0.42780673 | 0.43274504 | 0.43834057 | 0.44358013 | 0.44896648 | 0.4545301  | 0.46041969 | 0.46669226 | 0.47318816 | 0.47975446 | 0.48614483 | 0.49197815 | 0.49738179 | 0.50245732  | 0.50674665 | 0.51039307 |
| Namibia                     | 0.50240696 | 0.50671908 | 0.51081827 | 0.51457465 | 0.5191036  | 0.52388174 | 0.52935012 | 0.53506213 | 0.54089699 | 0.54651648 | 0.55227415 | 0.5596187  | 0.5669787  | 0.57459034 | 0.58232142 | 0.58982014 | 0.59628306 | 0.60175464 | 0.6066184  | 0.61092109  | 0.61454889 | 0.61756487 |
| South Africa                | 0.59409368 | 0.59788417 | 0.60092168 | 0.6035156  | 0.60626251 | 0.60998998 | 0.61501469 | 0.62066815 | 0.62594803 | 0.63064653 | 0.63526854 | 0.63999172 | 0.6447156  | 0.64943055 | 0.65396449 | 0.65841776 | 0.66264240 | 0.66703537 | 0.67140404 | 0.67576161  | 0.6796266  | 0.68308811 |
| Eastern Cape                | 0.53587488 | 0.53946484 | 0.54227296 | 0.54480334 | 0.54760921 | 0.55091963 | 0.5        |            |            |            |            |            |            |            |            |            |            |            |            |             |            |            |

|                       |            |            |            |             |            |            |            |            |            |            |            |            |            |            |            |            |            |            |            |            |            |            |
|-----------------------|------------|------------|------------|-------------|------------|------------|------------|------------|------------|------------|------------|------------|------------|------------|------------|------------|------------|------------|------------|------------|------------|------------|
| São Tomé and Príncipe | 0.32946011 | 0.33448479 | 0.34030284 | 0.34685198  | 0.35372238 | 0.36110588 | 0.36941301 | 0.37781352 | 0.38668894 | 0.39582124 | 0.40553067 | 0.41578373 | 0.42572131 | 0.43559246 | 0.44514624 | 0.45405147 | 0.46323008 | 0.47217093 | 0.4810982  | 0.48983823 | 0.49786141 | 0.50541375 |
| Senegal               | 0.2837849  | 0.2874519  | 0.29104629 | 0.29488717  | 0.29898452 | 0.30325721 | 0.30763391 | 0.3125703  | 0.31789409 | 0.32365773 | 0.32980407 | 0.3360599  | 0.34297711 | 0.350134   | 0.35718157 | 0.3641445  | 0.37111453 | 0.37835148 | 0.38607967 | 0.39401232 | 0.40119752 | 0.40805419 |
| Sierra Leone          | 0.21849284 | 0.22039123 | 0.22458583 | 0.2292359   | 0.23413167 | 0.23954994 | 0.24564789 | 0.25252308 | 0.25978156 | 0.26705838 | 0.27427027 | 0.28167357 | 0.29033851 | 0.30073669 | 0.31034887 | 0.31699865 | 0.32409156 | 0.33121343 | 0.33834156 | 0.34577002 | 0.35241202 | 0.35866588 |
| Togo                  | 0.30547296 | 0.30782826 | 0.31046991 | 0.313179206 | 0.31668794 | 0.31902558 | 0.32165939 | 0.3243825  | 0.32774314 | 0.33155854 | 0.33589958 | 0.34077726 | 0.3463205  | 0.3522786  | 0.35866144 | 0.36560017 | 0.37291003 | 0.38033623 | 0.38792123 | 0.39566727 | 0.40235692 | 0.4085337  |

## Section 9: Authors' Contributions

### Managing the overall research enterprise

Simon I Hay, Kasey E Kinzel, Christopher J L Murray, and Austin E Schumacher.

### Writing the first draft of the manuscript

Catherine Bisignano, Simon I Hay, Max L Mehlman, Susan A McLaughlin, Christopher J L Murray, and Austin E Schumacher.

### Primary responsibility for applying analytical methods to produce estimates

Haley Comfort, Darwin Phan Jones, Erin A May, and Spencer A Pease.

### Primary responsibility for seeking, cataloguing, extracting, or cleaning data; designing or coding figures and tables

Haley Comfort, John E Fuller, Yaz Ozten, Hannah Elizabeth Robinson-Oden, Nicholas Alexander Verghese, Denny Wang, and Stephanie Watson.

### Providing data or critical feedback on data sources

Cristiana Abbafati, Jaffar Abbas, Madineh Akram Abbasi, Ahmed Abdelwahab, Meriem Abdoun, Auwal Abdullahi, Ame Mehadi Abdurehman, Aidin Abedi, Armita Abedi, E S Abhilash, Richard Gyan Aboagye, Hassan Abolhassani, Lucas Guimarães Abreu, Niveen ME Abu-Rmeileh, Ahmed Abu-Zaid, Tim Adair, Oladimeji M Adebayo, Victor Adekanmbi, Rishan Adha, Qorinah Estiningtyas Sakilah Adnani, Saira Afzal, Pradyumna Agasthi, Antonella Agodi, Bright Opoku Ahinkorah, Danish Ahmad, Muayyad M Ahmad, Tauseef Ahmad, Keivan Ahmadi, Ayman Ahmed, Haroon Ahmed, Muktar Beshir Ahmed, Budi Aji, Sreelatha Akkala, Samuel Akyirem, Hanadi Al Hamad, Ammar Al Homsy, Mohammad Al Qadire, Khurshid Alam, Fahad Mashhour Alanezi, Turki M Alanzi, Mohammed Albashtawy, Mohammad T AlBataineh, Khalid F Alhabib, Abid Ali, Beriwan Abdulqadir Ali, Hassam Ali, Rafat Ali, Syed Shujait Shujait Ali, Sheikh Mohammad Alif, Syed Mohamed Aljunid, Wael Almahmeed, Joseph Uy Almazan, Omar Almidani, Mahmoud A Alomari, Salman Khalifah Al-Sabah, Awais Altaf, Farrukh Jawad Alvi, Hassan Alwafi, Hany wq, Azmeraw T Amare, Edward Kwabena Ameyaw, Alireza Amindarolzari, Hubert Amu, Deanna Anderlini, Pedro Prata Andrade, Tudorel Andrei, Dhanalakshmi Angappan, Sumadi Lukman Anwar, Seth Christopher Yaw Appiah, Muhammad Aqeel, Jalal Arabloo, Hany Ariffin, Timur Aripov, Benedetta Armocida, Anton A Artamonov, Judie Arulappan, Marvellous O Asika, Seyyed Shamsadin Athari, Alok Atreya, Sameh Attia, Beatriz Paulina Ayala Quintanilla, Getnet Melaku Ayele, Jose L Ayuso-Mateos, Gulrez Shah Azhar, Ahmed Y Azzam, Mina Babashahi, Ashish D Badiye, Soroush Baghdadi, Sara Bagherieh, Abdulaziz T Bako, Senthilkumar Balakrishnan, Ovidiu Constantin Baltatu, Maciej Banach, Palash Chandra Banik, Hansi Bansal, Martina Barchitta, Mainak Bardhan, Hiba Jawdat Barqawi, Ronald D Barr, Zarrin Basharat, Pritish Baskaran, Nebiyou Simegnaw Bayileyeegn, Emad Behboudi, Diana Fernanda Bejarano Ramirez, Uzma Iqbal Belgaumi, Michelle L Bell, Aminu K Bello, Olorunjuwon Omolaja Bello, Apostolos Beloukas, Salaheddine Bendak, Zombor Berezvai, Adam E Berman, Habtamu B Beyene, Akshaya Srikanth Bhagavathula, Dinesh Bhandari, Sonu Bhaskar, Vivek Bhat, Gurjit Kaur Bhatti, Jasvinder Singh Bhatti, Zulfiqar A Bhutta, Boris Bikbov, Bagas Suryo Bintoro, Francesca Bisulli, Aadam Olalekan Bodunrin, Obasanjo Afolabi Bolarinwa, Milad Bonakdar Hashemi, Berrak Bora Basara, Souad Bouaoud, Nicola Luigi Bragazzi, Dejana Braithwaite, Lemma N Bulto, Danilo Buonsenso, Reinhard Busse, Florentino Luciano Caetano dos Santos, Daniela Calina, Chao Cao, Juan J Carrero, Joao Mauricio Castaldelli-Maia, Carlos A Castañeda-Orjuela, Ferrán Catalá-López, Alberico L Catapano, Christopher R Cederroth, Francieli Cembranel, Pamela R Uscamaita Chacón-Uscamaita, Chiranjib Chakraborty, Vijay Kumar Chattu, Malizgani Paul Chavula, Derek S Chew, Abdulaal Chitheer, William C S Cho, Bryan Chong, Hitesh Chopra, Rajiv Chowdhury, Dinh-Toi Chu, Eric Chung, Alyssa Columbus, Haley Comfort, Joao Conde, Paolo Angelo Cortesi, Michael H Criqui, Natália Cruz-Martins, Matthew Cunningham, Giovanni Damiani, Aso Mohammad Darwesh, Saswati Das, Claudio Alberto Dávila-Cervantes, Aklilu Tamire Debele, Louisa Degenhardt, Lee Deitesfeld, Ivan Delgado-Enciso, Berecha Hundessa Demessa, Andreas K Demetriades, Nikolaos Dervenis, Hardik Dineshbhai Desai, Rupak Desai, Vinoth Gnana Chellaiyan Devanbu, Sameer Dhingra, Diana Dias da Silva, Daniel Diaz, M Ashworth Dirac, Abhinav Dixit, Shilpi Gupta Dixit, Thanh Chi Do, Thao Huynh Phuong Do, Masoud Dodangeh, Klara Georgieva Dokova, Christiane Dolecek, E Ray Dorsey, Wendel Mombaqué dos Santos, Rajkumar Doshi, Leila Doshmangir, Abdel Douiri, Haneil Larson Dsouza, Susanna J Dunachie, Bruce B Duncan, Andre Rodrigues Duraes, Senbagam Duraisamy, Paulina Agnieszka Dzianach, Ebrahim Eini, Michael Ekholuenetale, Temitope Cyrus Ekundayo, Rabie

Adel El Arab, Doaa Abdel Wahab El Morsi, Maysaa El Sayed Zaki, Frank J Elgar, Ryenchindorj Erkhembayar, Tesfahun C Eshetie, Sharareh Eskandarieh, Ugochukwu Anthony Eze, Adewale Oluwaseun Fadaka, Adeniyi Francis Fagbamigbe, Andre Faro, Hossein Farrokhpour, Ali Fatehizadeh, Valery L Feigin, Seyed-Mohammad Fereshtehnejad, Luisa S Flor, Artem Alekseevich Fomenkov, Richard Charles Franklin, Sara D Friedman, Takeshi Fukumoto, John E Fuller, Peter Andras Gaal, Muktar A Gadanya, Santosh Gaihre, Yaseen Galali, Jalaj Garg, Peter W Gething, Mansour Ghafourifard, Asadollah Gholamian, Pooyan Ghorbani Vajargah, Sherief Ghozy, Ruth Margaret Gibson, Alem Girmay, Laszlo Göbölös, Amit Goel, Mahaveer Golechha, Pouya Goleij, Housman Goudarzi, Mesay Dechasa Gudeta, Bhawna Gupta, Rajat Das Gupta, Sapna Gupta, Vijai Kumar Gupta, Vladimir Hachinski, Rasool Haddadi, Nils Haep, Adel Hajj Ali, Sobia Ahsan Halim, Brian J Hall, Rabih Halwani, Kanaan Hamagharib Abdullah, Mohammad Hamiduzzaman, Nasrin Hanifi, Josep Maria Haro, Faizul Hasan, M Tasdik Hasan, Abbas M Hassan, Soheil Hassanipour, Johannes Haubold, Rasmus J Havmoeller, Simon I Hay, Mahsa Heidari-Foroozan, Reza Heidari-Soureshjani, Claudiu Herteliu, Demisu Zenbaba Heyi, Md Mahbub Hossain, Mehdi Hosseinzadeh, Chengxi Hu, Md Nazmul Huda, Michael Hultström, Salman Hussain, Nawfal R Hussein, Le Duc Huy, Hong-Han Huynh, Segun Emmanuel Ibitoye, Desta Ijo, Olayinka Stephen Ilesanmi, Arnaud Iradukunda, Farideh Iravanpour, Kenneth Chukwuemeka Iregbu, Mohammad Mainul Islam, Sheikh Mohammed Shariful Islam, Nahlah Elkudssiah Ismail, Gaetano Isola, Mahalaxmi Iyer, Linda Merin J, Jalil Jaafari, Kathryn H Jacobsen, Morteza Jafarinia, Khushleen Jaggi, Nader Jahanmehr, Haitham Jahrami, Nityanand Jain, Mihajlo Jakovljevic, Sathish Kumar Jayapal, Shubha Jayaram, Digisise Mequanint Jemere, John S Ji, Yinzi Jin, Nabi Jomehzadeh, Darwin Phan Jones, Tamas Joo, Abel Joseph, Charity Ehimwenma Joshua, Jacek Jerzy Jozwiak, Mikk Jürisson, Billingsley Kaambwa, Zubair Kabir, Vidya Kadashetti, Pradnya Vishal Kakodkar, Leila R Kalankesh, Himal Kandel, Rami S Kantar, Neeti Kapoor, Mehrdad Karajizadeh, Samad Karkhah, Ajit K Karna, Faizan Zaffar Kashoo, Nicholas J Kassebaum, Adarsh Katamreddy, Srinivasa Vittal Katikireddi, Patrick DMC Katoto, Neda Kaydi, Gbenga A Kayode, Cathleen Keller, Morteza Abdullatif Khafaie, Himanshu Khajuria, Nauman Khalid, Ibrahim A Khalil, Imteyaz A Khan, Maseer Khan, Moien AB Khan, Mahammed Ziauddin Khan suheb, Khaled Khatab, Feriha Fatima Khidri, Jagdish Khubchandani, Grace Kim, Jihee Kim, Adnan Kisa, Sezer Kisa, Juniper Boroka Kiss, Ann Kristin Skrindo Knudsen, Gerbrand Koren, Soewarta Kosen, Sindhura Lakshmi Koulmane Laxminarayana, Kewal Krishan, Hare Krishna, Vijay Krishnamoorthy, Yuvaraj Krishnamoorthy, Barthelemy Kuate Defo, Mukhtar Kulimbet, Vishnuthethertha Kulkarni, Asep Kusnali, Dian Kusuma, Ilias Kyriopoulos, Hmwe Hmwe Kyu, Muhammad Awwal Ladan, Chandrakant Lahariya, Daphne Teck Ching Lai, Tri Laksono, Dharmesh Kumar Lal, Judit Lám, Anders O Larsson, Savita Lasrado, Kamaluddin Latief, Kaveh Latifinaibin, Nhi Huu Hanh Le, Thao Thi Thu Le, Trang Diep Thanh Le, Munjae Lee, Sang-woong Lee, Seung Won Lee, James Leigh, Yichong Li, Lee-Ling Lim, Stephen S Lim, Stefan Listl, Jue Liu, Erand Llanaj, László Lorenzovici, Rafael Lozano, Jianing Ma, Zheng Feei Ma, Monika Machoy, Azzam A Maghazachi, Elham Mahmoudi, Jeadran N Malagón-Rojas, Elaheh Malakan Rad, Kashish Malhotra, Deborah Carvalho Malta, Abdullah A Mamun, Yasaman Mansoori, Mohammad Ali Mansournia, Lorenzo Giovanni Mantovani, Joemer C Maravilla, Agustina M Marconi, Parham Mardi, Abdoljalal Marjani, Carlos Alberto Marrugo Arnedo, Bernardo Alfonso Martinez-Guerra, Francisco Rogerlândio Martins-Melo, Sharmeen Maryam, Roy Rillera Marzo, Clara N Matei, Andrea Maugeri, Erin A May, Maryam Mazaheri, Michael A McPhail, Enkeleint A Mechili, Jitendra Kumar Meena, Entezar Mehrabi Nasab, Walter Mendoza, Ritesh G Menezes, Endalkachew Worku Mengesha, Atte Meretoja, Tuomo J Meretoja, Irmira Maria Michalek, Ted R Miller, Giada Minelli, Le Huu Nhat Minh, Babak Moazen, Soheil Mohammadi, Abdollah Mohammadian-Hafshejani, Mustapha Mohammed, Salahuddin Mohammed, Shafiu Mohammed, Ali H Mokdad, Peyman Mokhtarzadehazar, Sara Momtazmanesh, Lorenzo Monasta, Mohammad Ali Moni, Maryam Moradi, Yousef Moradi, Maziar Moradi-Lakeh, Mehdi Moradinazar, Shane Douglas Morrison, Jakub Morze, Jonathan F Mosser, Vincent Mougín, Sumaira Mubarik, Ulrich Otto Mueller, Faraz Mughal, Sumoni Mukherjee, George Duke Mukoro, Admir Mulita, Francesk Mulita, Malaisamy Muniyandi, Christopher J L Murray, Fungai Musaigwa, Ghulam Mustafa, Saravanan Muthupandian, Ahamarshan Jayaraman Nagarajan, Mohsen Naghavi, Ganesh R Naik, Mukhammad David Naimzada, Sanjeev Nair, Tapas Sadasivan Nair, Luigi Naldi, Shumaila Nargus, Bruno Ramos Nascimento, Gustavo G Nascimento, Mohammad Javad Nasiri, Zuhair S Natto, Muhammad Naveed, Biswa Prakash Nayak, Amayu Kumesa Negero, Ionut Negoii, Ruxandra Irina Negoii, Evangelia Nena, Charles Richard James Newton, Josephine W Ngunjiri, Dang H Nguyen, Phat Tuan Nguyen, Van Thanh Nguyen, Taxiarchis Konstantinos Nikolouzakis, Amin Reza Nikpoor, Muhammad A Nizam, Shuhei Nomura, Mamoona Noreen, Bo Norrving, Jean Jacques Noubiap, Dieta Nurriika, Bogdan Oancea, Kehinde O Obamiro, Ismail A Odetokun, Akinkunmi Paul Okekunle, Osaretin Christabel Okonji, Andrew T Olagunju, Bolajoko Olubukunola Olusanya, Jacob Olusegun Olusanya, Hany A Omar, Sokking Ong, Obinna E Onwujekwe, Orish Ebere Orisakwe, Edgar Ortiz-Brizuela, Uchechukwu Levi Osuagwu, Amel Ouyahia, Mayowa O Owolabi, Mahesh Padukudru P A, Jagadish Rao Padubidri, Raffaele Palladino, Ioannis Pantazopoulos, Paraskevi Papadopoulou, Shahina Pardhan, Romil R Parikh, Ashwaghosha Parthasarathi, Deepak Kumar Pasupula,

Sangram Kishor Patel, Aslam Ramjan Pathan, Shankargouda Patil, Venkata Suresh Patthipati, Uttam Paudel, Shrikant Pawar, Paolo Pedersini, Veincent Christian Filipino Pepito, Gavin Pereira, Jeevan Pereira, Mario F P Peres, Arokiasamy Perianayagam, Hoang Tran Pham, Daniela Pierannunzio, David M Pigott, Peter Pollner, Ramesh Poluru, Maarten J Postma, Naeimeh Pourtaheri, Sergio I Prada, Vijay Kumar Prajapati, Elton Junio Sady Prates, Nguyen Khoi Quan, Fakher Rahim, Tafhimur Rahman, Amir Masoud Rahmani, Sathish Rajaa, Prasanna Ram, Shakthi Kumaran Ramasamy, Sheena Ramazanu, Juwel Rana, Kritika Rana, Chhabi Lal Ranabhat, Nemanja Rancic, Chythra R Rao, Sowmya J Rao, Sina Rashedi, Vahid Rashedi, Ahmed Mustafa Rashid, Prateek Rastogi, Nakul Ravikumar, Salman Rawaf, Reza Rawassizadeh, Bhageerathy Reshmi, Serge Resnikoff, Luis Felipe Reyes, Nima Rezaei, Maria Jesus Rios-Blancas, Hannah Elizabeth Robinson-Oden, Mónica Rodrigues, Jefferson Antonio Buendia Rodriguez, Leonardo Roeber, Peter Rohloff, Debby Syahru Romadlon, Luca Ronfani, Priyanka Roy, Enrico Rubagotti, Aly M A Saad, Korosh Saber, Basema Saddik, Adam Saddler, Bashdar Abuzed Sadee, Ehsan Sadeghi, Umar Saeed, Maryam Saeedi, Rajesh Sagar, Narjes Saheb Sharif-Askari, Mohammad Ali Sahraian, Mirza Rizwan Sajid, Joseph W Sakshaug, Afeez Abolarinwa Salami, Marwa Rashad Salem, Sara Samadzadeh, Vijaya Paul Samuel, Abdallah M Samy, Juan Sanabria, Nima Sanadgol, Francesca Sanna, Milena M Santric-Milicevic, Babak Saravi, Arash Sarveazad, Brijesh Sathian, Sonia Saxena, Yaser Sayadi, Md Abu Sayeed, Mete Saylan, Maria Inês Schmidt, David C Schwebel, Mario Škerija, Subramanian Senthilkumaran, Yashendra Sethi, Amir Shafaat, Pritik A Shah, Saeed Shahabi, Masood Ali Shaikh, Husain Shakil, Sunder Sham, Mehran Shams-Beyranvand, Mohammad Anas Shamsi, Abhishek Shankar, Javad Sharifi-Rad, Rajesh Sharma, Vishal Sharma, Rajesh P Shastry, David H Shaw, Jiabin Shen, B Suresh Kumar Shetty, Kenji Shibuya, Jae Il Shin, Aminu Shittu, K M Shivakumar, Sunil Shrestha, Inga Dora Sigfusdottir, Luís Manuel Lopes Rodrigues Silva, Abhinav Singh, Aditya Singh, Ambrish Singh, Baljinder Singh, Narinder Pal Singh, Paramdeep Singh, Valentin Yurievich Skryabin, Anna Aleksandrovna Skryabina, Erica Leigh N Slepak, Sameh S M Soliman, Yonatan Solomon, Ireneous N Soyiri, Michael Spartalis, Chandrashekhar T Sreeramareddy, Fridolin Steinbeis, Muhammad Suleman, Rizwan Suliankatchi Abdulkader, Abida Sultana, Chandan Kumar Swain, Bryan L Sykes, Mindy D Szeto, Miklós Szócska, Payam Tabae Damavandi, Shima Tabatabai, Karen M Tabb, Mohammad Tabish, Takahiro Tabuchi, Amirmasoud Taheri, Yasaman Taheri Abkenar, Amir Taherkhani, Jabeen Taiba, Ker-Kan Tan, Nuno Taveira, Yibekal Manaye Tefera, Pugazhenthan Thangaraju, Nihal Thomas, Amanda G Thrift, Chern Choong Chern Thum, Marcello Tonelli, Mathilde Touvier, Marcos Roberto Tovani-Palone, Domenico Trico, Indang Trihandini, Samuel Joseph Tromans, Kang Tung, Sana Ullah, Muhammad Umair, Tungki Pratama Umar, Bhaskaran Unnikrishnan, Era Upadhyay, Sahel Valadan Tahbaz, Jef Van den Eynde, Shoban Babu Varthya, Tommi Juhani Vasankari, Narayanaswamy Venketasubramanian, Nicholas Alexander Verghese, Pratibha Verma, Massimiliano Veroux, Georgios-Ioannis Verras, Vasily Vlassov, Bay Vo, Simona Ruxandra Volovat, Victor Volovici, Avina Vongpradith, Theo Vos, Yohannes Dibaba Wado, Yasir Waheed, Denny Wang, Shu Wang, Stefanie Watson, Kosala Gayan Weerakoon, Daniel J Weiss, Andrea Werdecker, Ronny Westerman, Dakshitha Praneeth Wickramasinghe, Tissa Wijeratne, Sajad Yaghoubi, Yuichiro Yano, Yao Yao, Pengpeng Ye, Gesila Endashaw Yesera, Renjulal Yesodharan, Paul Yip, Dong Keon Yon, Naohiro Yonemoto, Mustafa Z Younis, Chuanhua Yu, Vesna Zadnik, Mohammad Zahedi, Nazar Zaki, Josefina Zakzuk, Ghazal G Z Zandieh, Iman Zare, Mikhail Sergeevich Zastrozhin, Mohammed G M Zeariya, Chunxia Zhai, Zhaohua Zhu, and Magdalena Zielińska.

### Developing methods or computational machinery

Cristiana Abbafati, Rouzbeh Abbasgholizadeh, Rishan Adha, Qorinah Estiningtyas Sakilah Adnani, Saira Afzal, Muktar Beshir Ahmed, Tareq Mohammed Ali AL-Ahdal, Mohammed Albashtawy, Robert W Aldridge, Hubert Amu, Aleksandr Y Aravkin, Judie Arulappan, Ahmed Y Azzam, Emad Behboudi, Michelle L Bell, Akshaya Srikanth Bhagavathula, Aadam Olalekan Bodunrin, Souad Bouaoud, Kelly M Cercy, William C S Cho, Eunice Chung, Kaleb Coberly, Haley Comfort, Garland T Culbreth, Matthew Cunningham, Aso Mohammad Darwesh, Hardik Dineshbhai Desai, Thanh Chi Do, Paulina Agnieszka Dzianach, Michael Ekholuenetale, Maysaa El Sayed Zaki, Mehdi Emamverdi, Ali Fatehizadeh, Abraham D Flaxman, Jalaj Garg, Peter W Gething, Pooyan Ghorbani Vajargah, Sherief Ghozy, Alem Girmay, Sobia Ahsan Halim, Kanaan Hamagharib Abdullah, Mohammad Hasanian, Simon I Hay, Mohammad Heidari, Hamed Hesami, Mehdi Hosseinzadeh, Md Nazmul Huda, Javid Hussain, Hong-Han Huynh, Kevin S Ikuta, Farideh Iravanpour, Mohammad Mainul Islam, Gaetano Isola, Linda Merin J, Morteza Jafarinia, Sathish Kumar Jayapal, Wonjeong Jeong, Nabi Jomehzadeh, Darwin Phan Jones, Charity Ehimwenma Joshua, Samad Karkhah, Faizan Zaffar Kashoo, Nicholas J Kassebaum, Ikramullah Khan, Adnan Kisa, Juniper Boroka Kiss, Chandrakant Lahariya, Nhi Huu Hanh Le, Thao Thi Thu Le, Sang-woong Lee, Erand Llanaj, Erin A May, Michael A McPhail, Le Huu Nhat Minh, Seyed Kazem Mirinezhad, Abdollah Mohammadian-Hafshejani, Saeed Mohammad-pour, Hoda Mojiri-forushani, Ali H Mokdad, Mohammad Ali Moni, Yousef Moradi, Admir Mulita, Francesk Mulita, Christopher J L Murray, Mohsen Naghavi, Josephine W Ngunjiri, Phat Tuan Nguyen, Van

Thanh Nguyen, Andrew T Olagunju, Michal Ordak, Yaz Ozten, Jagadish Rao Padubidri, Adrian Pana, Shrikant Pawar, Spencer A Pease, Gavin Pereira, Hoang Tran Pham, Govinda Raj Poudel, Hadi Raeisi Shahraki, Amir Masoud Rahmani, Chhabi Lal Ranabhat, Reza Rawassizadeh, Robert C Reiner Jr, Mónica Rodrigues, Enrico Rubagotti, Susan Fred Rumisha, Korosh Saber, Adam Saddler, Umar Saeed, Abdallah M Samy, Ganesh Kumar Saya, Yaser Sayadi, Austin E Schumacher, Amir Shafaat, Mohammad Anas Shamsi, Javad Sharifi-Rad, David H Shaw, Reed J D Sorensen, Michael Spertalis, Muhammad Suleman, Chandan Kumar Swain, Razieh Tavakoli Oliace, Chern Choong Chern Thum, Muhammad Umair, Shoban Babu Varthya, Bay Vo, Stein Emil Vollset, Theo Vos, Daniel J Weiss, Ronny Westerman, Ghazal G Z Zandieh, Mohammed G M Zeiriya, Yang Zhao, and Peng Zheng.

### Providing critical feedback on methods or results

Amirali Aali, Cristiana Abbafati, Jaffar Abbas, Rouzbeh Abbasgholizadeh, Madineh Akram Abbasi, Mohammadreza Abbasian, Samar Abd ElHafeez, Michael Abdelmasseh, Sherief Abd-Elsalam, Ahmed Abdelwahab, Mohammad Abdollahi, Meriem Abdoun, Auwal Abdullahi, Ame Mehadi Abdurehman, Mesfin Abebe, Aidin Abedi, Armita Abedi, Tadesse M Abegaz, Roberto Ariel Abeldaño Zuñiga, E S Abhilash, Olugbenga Olusola Abiodun, Richard Gyan Aboagye, Hassan Abolhassani, Mohamed Abouzid, Lucas Guimarães Abreu, Woldu Aberhe Abrha, Michael R M Abrigo, Dariush Abtahi, Samir Abu Rumeileh, Niveen ME Abu-Rmeileh, Salahdein Aburuz, Ahmed Abu-Zaid, Juan Manuel Acuna, Tim Adair, Isaac Yeboah Addo, Oladimeji M Adebayo, Oyelola A Adegbeye, Victor Adekanmbi, Bashir Aden, Abiola Victor Adepoju, Charles Oluwaseun Adetunji, Temitayo Esther Adeyeoluwa, Olorunsola Israel Adeyomoye, Rishan Adha, Amin Adibi, Wirawan Adikusuma, Qorinah Estiningtyas Sakilah Adnani, Saryia Adra, Abel Afework, Aanuoluwapo Adeyimika Afolabi, Shadi Afyouni, Saira Afzal, Pradyumna Agasthi, Shahin Aghamiri, Antonella Agodi, Williams Agyemang-Duah, Bright Opoku Ahinkorah, Aqeel Ahmad, Danish Ahmad, Firdos Ahmad, Muayyad M Ahmad, Tauseef Ahmad, Amir Mahmoud Ahmadzade, Mohadese Ahmadzade, Ayman Ahmed, Haroon Ahmed, Luai A Ahmed, Muktar Beshir Ahmed, Syed Anees Ahmed, Budi Aji, Olufemi Ajumobi, Gizachew Tadesse Akalu, Essona Matatom Akara, Karolina Akinosoglou, Sreelatha Akkala, Samuel Akyirem, Hanadi Al Hamad, Syed Mahfuz Al Hasan, Ammar Al Homsy, Mohammad Al Qadire, Moein Ala, Timothy Olukunle Aladelusi, Samer O Alalalmeh, Ziyad Al-Aly, Khurshid Alam, Manjurul Alam, Zufishan Alam, Rasmieh Mustafa Al-amer, Fahad Mashhour Alanezi, Turki M Alanzi, Mohammed Albashtawy, Mohammad T AlBataineh, Sharifullah Alemi, Adel Ali Saeed Al-Gheethi, Khalid F Alhabib, Mohammed Khaled Al-Hanawi, Abid Ali, Akhtar Ali, Hassam Ali, Mohammed Usman Ali, Rafat Ali, Syed Shujait Shujait Ali, Zahid Ali, Shohreh Alian Samakkhah, Gianfranco Alicandro, Mohammad Aligol, Rasoul Alimi, Ahmednur Adem Aliyi, Syed Mohamed Aljunid, Wael Almahmeed, Sabah Al-Marwani, Sadeq Ali Ali Al-Maweri, Joseph Uy Almazan, Hesham M Al-Mekhlafi, Omar Almidani, Mahmoud A Alomari, Jaber S Alqahtani, Ahmed Yaseen Alqutaibi, Salman Khalifah Al-Sabah, Awais Altaf, Jaffar A Al-Tawfiq, Khalid A Altirkawi, Farrukh Jawad Alvi, Hassan Alwafi, Yaser Mohammed Al-Worafi, Hany wq, Kareem H Alzoubi, Azmeraw T Amare, Edward Kwabena Ameyaw, Abebe Feyissa Amhare, Tarek Tawfik Amin, Alireza Amindarolzarbi, Javad Aminian Dehkordi, Sohrab Amiri, Hubert Amu, Dickson A Amugsi, Jimoh Amzat, Deanna Anderlini, Pedro Prata Andrade, Catalina Liliana Andrei, Tudorel Andrei, Dhanalakshmi Angappan, Afifa Anjum, Ernoiz Antriandarti, Iyadunni Adesola Anuoluwa, Sumadi Lukman Anwar, Anayochukwu Edward Anyasodor, Seth Christopher Yaw Appiah, Jalal Arabloo, Morteza Arab-Zozani, Mosab Arafat, Abdulfatai Aremu, Hany Ariffin, Timur Aripov, Benedetta Armocida, Mahwish Arooj, Anton A Artamonov, Kurnia Dwi Artanti, Judie Arulappan, Idowu Thomas Aruleba, Raphael Taiwo Aruleba, Ashokan Arumugam, Saeed Asgary, Mubarek Yesse Ashemo, Muhammad Ashraf, Marvellous O Asika, Seyyed Shamsadin Athari, Maha Moh'd Wahbi Atout, Alok Atreya, Sameh Attia, Avinash Aujayeb, Abolfazl Avan, Adedapo Wasiu Awotidebe, Beatriz Paulina Ayala Quintanilla, Martin Amogre Ayanore, Getnet Melaku Ayele, Sina Azadnajafabad, Gulrez Shah Azhar, Shahkaar Aziz, Ahmed Y Azzam, Mina Babashahi, Abraham Samuel Babu, Muhammad Badar, Alaa Badawi, Ashish D Badiye, Soroush Baghdadi, Nasser Bagheri, Sara Bagherieh, Sulaiman Bah, Saeed Bahadorikhalili, Jianjun Bai, Ruhai Bai, Jennifer L Baker, Shankar M Bakkannavar, Abdulaziz T Bako, Senthilkumar Balakrishnan, Saliu A Balogun, Ovidiu Constantin Baltatu, Maciej Banach, Soham Bandyopadhyay, Biswajit Banik, Palash Chandra Banik, Hansi Bansal, Shirin Barati, Martina Barchitta, Mainak Bardhan, Hiba Jawdat Barqawi, Lope H Barrero, Zarrin Basharat, Asma'u I J Bashir, Hameed Akande Bashiru, Pritish Baskaran, Quique Bassat, João Diogo Basso, Saurav Basu, Kavita Batra, Ravi Batra, Bernhard T Baune, Mohsen Bayati, Nebiyou Simegnew Bayileye, Tahmina Begum, Emad Behboudi, Amir Hossein Behnoush, Diana Fernanda Bejarano Ramirez, Uzma Iqbal Belgaumi, Michelle L Bell, Aminu K Bello, Olorunjuwon Omolaja Bello, Apostolos Beloukas, Salaheddine Bendak, Derrick A Bennett, Isabela M Bensor, Habib Benzian, Adam E Berman, Amiel Nazer C Bermudez, Habtamu B Beyene, Devidas S Bhagat, Akshaya Srikanth Bhagavathula, Neeraj Bhala, Ashish Bhalla, Dinesh Bhandari, Nikha Bhardwaj, Pankaj Bhardwaj, Prarthna



V Bhardwaj, Ashish Bhargava, Sonu Bhaskar, Vivek Bhat, Gurjit Kaur Bhatti, Jasvinder Singh Bhatti, Manpreet S Bhatti, Rajbir Bhatti, Zulfiqar A Bhutta, Boris Bikbov, Bagas Suryo Bintoro, Francesca Bisulli, Atanu Biswas, Raaj Kishore Biswas, Archie Bleyer, Virginia Bodolica, Aadam Olalekan Bodunrin, Obasanjo Afolabi Bolarinwa, Milad Bonakdar Hashemi, Aime Bonny, Kaustubh Bora, Safiya Bala Borodo, Alejandro Botero Carvajal, Souad Bouaoud, Sofiane Boudalia, Edward J Boyko, Nicola Luigi Bragazzi, Dejana Braithwaite, Hermann Brenner, Gabrielle Britton, Annie J Browne, Andre R Brunoni, Norma B Bulamu, Lemma N Bulto, Danilo Buonsenso, Katrin Burkart, Sharath Burugina Nagaraja, Yasser Bustanji, Zahid A Butt, Florentino Luciano Caetano dos Santos, Tianji Cai, Ismael R Campos-Nonato, Chao Cao, Carlos Alberto Cardenas, Rosario Cárdenas, Joao Mauricio Castaldelli-Maia, Carlos A Castañeda-Orjuela, Giulio Castelpietra, Ferrán Catalá-López, Alberico L Catapano, Christopher R Cederroth, Francieli Cembranel, Muthia Cenderadewi, Ester Cerin, Muge Cevik, Pamela R Uscamaita Chacón-Uscamaita, Yaacoub Chahine, Chiranjib Chakraborty, Chin-Kuo Chang, Periklis Charalampous, Jaykaran Charan, Vijay Kumar Chattu, Victoria Chatzimavridou-Grigoriadou, Malizgani Paul Chavula, Huzaifa Ahmad Cheema, An-Tian Chen, Haowei Chen, Lingxiao Chen, Meng Xuan Chen, Nicolas Cherbuin, Derek S Chew, Jesus Lorenzo Chirinos-Caceres, William C S Cho, Bryan Chong, Hitesh Chopra, Rajiv Chowdhury, Dinh-Toi Chu, Isaac Sunday Chukwu, Eric Chung, Eunice Chung, Sheng-Chia Chung, Karly I Cini, Cain C T Clark, Alyssa Columbus, Haley Comfort, Joao Conde, Sara Conti, Paolo Angelo Cortesi, Vera Marisa Costa, Ewerton Cousin, Richard G Cowden, Michael H Criqui, Natália Cruz-Martins, Garland T Culbreth, Patricia Cullen, Matthew Cunningham, Daniel da Silva e Silva, Omid Dadras, Zhaoli Dai, Koustuv Dalal, Lachlan L Dalli, Giovanni Damiani, Emanuele D'Amico, Sara Daneshvar, Aso Mohammad Darwesh, Jai K Das, Saswati Das, Nihar Ranjan Dash, Mohsen Dashti, Claudio Alberto Dávila-Cervantes, Kairat Davletov, Aklilu Tamire Debele, Louisa Degenhardt, Reza Dehbandi, Ivan Delgado-Enciso, Daniel Demant, Berecha Hundessa Demessa, Andreas K Demetriades, Xinlei Deng, Kebede Deribe, Nikolaos Dervenis, Don C Des Jarlais, Hardik Dineshbhai Desai, Rupak Desai, Keshab Deuba, Vinoth Gnana Chellaiyan Devanbu, Sourav Dey, Arkadeep Dhali, Kuldeep Dhama, Mandira Lamichhane Dhimal, Meghnath Dhimal, Sameer Dhingra, Diana Dias da Silva, Daniel Diaz, Adriana Dima, Delaney D Ding, M Ashworth Dirac, Abhinav Dixit, Shilpi Gupta Dixit, Thanh Chi Do, Thao Huynh Phuong Do, Camila Bruneli do Prado, Masoud Dodangeh, Klara Georgieva Dokova, Christiane Dolecek, E Ray Dorsey, Wendel Mombaqué dos Santos, Rajkumar Doshi, Leila Doshmangir, Abdel Douiri, Robert Kokou Dowou, Tim Robert Driscoll, Haneil Larson Dsouza, John Dube, Susanna J Dunachie, Senbagam Duraisamy, Oyewole Christopher Durojaiye, Sulagna Dutta, Arkadiusz Marian Dziedzic, Oluwakemi Ebenezer, Ejemai Eboreime, Alireza Ebrahimi, Abdelaziz Ed-Dra, Hisham Atan Edinur, David Edvardsson, Kristina Edvardsson, Defi Efendi, Ferry Efendi, Shayan Eghdami, Terje Andreas Eikemo, Ebrahim Eini, Michael Ekholuenetale, Emmanuel Ekpok, Temitope Cyrus Ekundayo, Rabie Adel El Arab, Doaa Abdel Wahab El Morsi, Maysaa El Sayed Zaki, Noha Mousaad Elemam, Frank J Elgar, Islam Y Elgendy, Ghada Metwally Tawfik ElGohary, Muhammed Elhadi, Omar Abdelsadek Abdou Elmeligy, Mohammed Elshaer, Ibrahim Elsohaby, Amir Emami Zeydi, Mehdi Emamverdi, Theophilus I Emeto, Tesfahun C Eshetie, Sharareh Eskandarieh, Juan Espinosa-Montero, Farshid Etaee, Ugochukwu Anthony Eze, Natalia Fabin, Adewale Oluwaseun Fadaka, Adeniyi Francis Fagbamigbe, Saman Fahimi, Luca Falzone, Carla Sofia e Sá Farinha, MoezAllIslam Ezzat Mahmoud Faris, Andre Faro, Hossein Farrokhpour, Ali Fatehizadeh, Hamed Fattahi, Pooria Fazeli, Ginenus Fekadu, Seyed-Mohammad Fereshtehnejad, Abdullah Hamid Feroze, Daniela Ferrante, Pietro Ferrara, Getahun Fetensa, Irina Filip, Florian Fischer, Joanne Flavel, Luisa S Flor, Morenike Oluwatoyin Folayan, Kristen Marie Foley, Artem Alekseevich Fomenkov, Lisa M Force, Carla Fornari, Matteo Foschi, Kate Louise Francis, Richard Charles Franklin, Alberto Freitas, Joseph Friedman, Sara D Friedman, Takeshi Fukumoto, Peter Andras Gaal, Muktar A Gadanya, Santosh Gaihre, Abduzhappar Gaipov, Emmanuela Gakidou, Yaseen Galali, Quan Gan, Aravind P Gandhi, Balasankar Ganesan, Jalaj Garg, Shuo-Yan Gau, Prem Gautam, Rupesh K Gautam, Federica Gazzelloni, Miglas W Gebregergis, Mesfin Gebrehiwot, Tesfay Brhane Gebremariam, Urge Gerema, Motuma Erena Getachew, Tamirat Getachew, Peter W Gething, Sulmaz Ghahramani, Khalid Yaser Ghailan, Alireza Ghajar, Mohammad Javad Ghanbarnia, MohammadReza Ghasemi, Afsaneh Ghasemzadeh, Fariba Ghassemi, Ramy Mohamed Ghazy, Sailaja Ghimire, Asadollah Gholamian, Ali Gholamrezanezhad, Pooyan Ghorbani Vajargah, Sherief Ghozy, Arun Digambarrao Ghuge, Alessandro Gialluisi, Ruth Margaret Gibson, Artyom Urievich Gil, Paramjit Singh Gill, Tiffany K Gill, Themba G Ginindza, Alem Girmay, James C Glasbey, Elena V Gnedovskaya, Laszlo Göbölös, Mohamad Goldust, Mahaveer Golechha, Arefeh Golestanfar, Davide Golinelli, Philimon N Gona, Amir Hossein Goudarzian, Scott Greenhalgh, Michal Grivna, Giovanni Guarducci, Mohammed Ibrahim Mohialdeen Gubari, Mesay Dechasa Gudeta, Avirup Guha, Stefano Guicciardi, Damitha Asanga Gunawardane, Sasidhar Gunturu, Cui Guo, Anish Kumar Gupta, Bhawna Gupta, Indarchand Ratanlal Gupta, Rajat Das Gupta, Sapna Gupta, Veer Bala Gupta, Vijai Kumar Gupta, Vivek Kumar Gupta, Reyna Alma Gutiérrez, Farrokh Habibzadeh, Parham Habibzadeh, Vladimir Hachinski, Mohammad Haddadi, Rasool Haddadi, Nils Haep, Adel Hajj Ali, Esam S Halboub, Sobia Ahsan Halim, Brian J Hall, Sebastian Haller, Rabih Halwani, Randah R Hamadeh, Kanaan



Hamagharib Abdullah, Samer Hamidi, Mohammad Hamiduzzaman, Ahmad Hammoud, Nasrin Hanifi, Md Nuruzzaman Haque, Harapan Harapan, Josep Maria Haro, Ahmed I Hasaballah, Faizul Hasan, Ikramul Hasan, M Tasdik Hasan, Hamidreza Hasani, Ali Hasanpour- Dehkordi, Abbas M Hassan, Hossein Hassanian-Moghaddam, Soheil Hassanipour, Johannes Haubold, Rasmus J Havmoeller, Simon I Hay, Youssef Hbid, Jeffrey J Hebert, Omar E Hegazi, Golnaz Heidari, Mohammad Heidari, Mahsa Heidari-Faroozan, Bartosz Helfer, Claudiu Herteliu, Hamed Hesami, Dineshani Hettiarachchi, Demisu Zenbaba Heyi, Kamal Hezam, Yuta Hiraike, Howard J Hoffman, Ramesh Holla, Nobuyuki Horita, Md Mahbub Hossain, Md Belal Hossain, Sahadat Hossain, Mohammad-Salar Hosseini, Hassan Hosseinzadeh, Mehdi Hosseinzadeh, Mihaela Hostiuc, Mohamed Hsairi, Chengxi Hu, Md Nazmul Huda, Fernando N Hugo, Michael Hultström, Salman Hussain, Nawfal R Hussein, Le Duc Huy, Hong-Han Huynh, Bing-Fang Hwang, Segun Emmanuel Ibitoye, Oluwatope Olaniyi Idowu, Desta Ijo, Kevin S Ikuta, Mehran Ilaghi, Irena M Ilic, Milena D Ilic, Mustapha Immurana, Arnaud Iradukunda, Farideh Irvanpour, Kenneth Chukwuemeka Iregbu, Md Rabiul Islam, Mohammad Mainul Islam, Sheikh Mohammed Shariful Islam, Farhad Islami, Nahlah Elkudssiah Ismail, Gaetano Isola, Masao Iwagami, Chidozie C D Iwu, Chinwe Juliana Iwu-Jaja, Mahalaxmi Iyer, Linda Merin J, Jalil Jaafari, Louis Jacob, Kathryn H Jacobsen, Farhad Jadidi-Niaragh, Morteza Jafarinia, Khushleen Jaggi, Haitham Jahrami, Nityanand Jain, Ammar Abdulrahman Jairoun, Mihajlo Jakovljevic, Elham Jamshidi, Chinmay T Jani, Mark M Janko, Abubakar Ibrahim Jatau, Sathish Kumar Jayapal, Shubha Jayaram, Jayakumar Jeganathan, Alelign Tasew Jema, Digisie Mequanint Jemere, Anil K Jha, Ravi Prakash Jha, John S Ji, Heng Jiang, Yingzhao Jin, Yinzi Jin, Olatunji Johnson, Nabi Jomehzadeh, Darwin Phan Jones, Tamas Joo, Abel Joseph, Nitin Joseph, Charity Ehimwenma Joshua, Jacek Jerzy Jozwiak, Mikk Jürisson, Billingsley Kaambwa, Ali Kabir, Hannaneh Kabir, Zubair Kabir, Vidya Kadashetti, Farima Kahe, Pradnya Vishal Kakodkar, Rizwan Kalani, Leila R Kalankesh, Sanjay Kalra, Ashwin Kamath, Thanigaivelan Kanagasabai, Himal Kandel, Kehinde Kazeem Kanmodi, Rami S Kantar, Neeti Kapoor, Mehrdad Karajizadeh, Behzad Karami Matin, Ibraheem M Karaye, Asima Karim, Hanie Karimi, Salah Eddin Karimi, Arman Karimi Behnagh, Samad Karkhah, Ajit K Karna, Faizan Zaffar Kashoo, Nigussie Assefa Kassaw, Nicholas J Kassebaum, Adarsh Katamreddy, Srinivasa Vittal Katikireddi, Patrick DMC Katoto, Joonas H Kauppila, Navjot Kaur, Neda Kaydi, Gbenga A Kayode, Foad Kazemi, Sina Kazemian, sara Kazemina, Leila Keikavoosi-Arani, Cathleen Keller, John H Kempen, Jessica A Kerr, Mohammad Keykhaei, Mohamad Mehdi Khadembashiri, Mohammad Amin Khadembashiri, Morteza Abdullatif Khafaie, Himanshu Khajuria, Mohammad Khalafi, Amirmohammad Khalaji, Nauman Khalid, Faham Khamesipour, Asaduzzaman Khan, Ikramullah Khan, Imteyaz A Khan, Maseer Khan, Moien AB Khan, Taimoor Khan, Mahammed Ziauddin Khan suheb, Shaghayegh Khanmohammadi, Khaled Khatib, Fatemeh Khatami, Armin Khavandegar, khalid a kheirallah, Feriha Fatima Khidri, Moein Khormali, Jagdish Khubchandani, Helda Khusun, Zemene Demelash Kifle, Grace Kim, Jihee Kim, Ruth W Kimokoti, Girmay Tsegay Kiross, Adnan Kisa, Sezer Kisa, Juniper Boroka Kiss, Mika Kivimäki, Desmond Klu, Ann Kristin Skrindo Knudsen, Ali-Asghar Kolahi, Farzad Kompani, Gerbrand Koren, Karel Kostev, Ashwin Laxmikant Kotnis, Sindhura Lakshmi Koulmane Laxminarayana, Ai Koyanagi, Michael A Kravchenko, Kewal Krishan, Hare Krishna, Vijay Krishnamoorthy, Yuvaraj Krishnamoorthy, Barthelemy Kuate Defo, Burcu Kucuk Bicer, Md Abdul Kuddus, Mohammed Kuddus, Ilari Kuitunen, Omar Kujan, Vishnutheertha Kulkarni, Ashish Kumar, Harish Kumar, Nithin Kumar, Rahul Kumar, Shiv Kumar, Almagul Kurmanova, Om P Kurmi, Asep Kusnali, Dian Kusuma, Tezer Kutluk, Ambily Kuttikkattu, Evans F Kyei, Ilias Kyriopoulos, Hmwe Hmwe Kyu, Carlo La Vecchia, Muhammad Awwal Ladan, Chandrakant Lahariya, Abdelilah Lahmar, Daphne Teck Ching Lai, Tri Laksono, Dharmesh Kumar Lal, Tea Lallukka, Judit Lám, Demetris Lamnisos, Tuo Lan, Francesco Lanfranchi, Berthold Langguth, Van Charles Lansingh, Ariane Laplante-Lévesque, Bagher Larijani, Savita Lasrado, Kamaluddin Latief, Mahrugh Latif, Kaveh Latifinaibin, Paolo Lauriola, Long Khan Dao Le, Nhi Huu Hanh Le, Thao Thi Thu Le, Trang Diep Thanh Le, Munjae Lee, Sang-woong Lee, Seung Won Lee, Wei-Chen Lee, Yo Han Lee, Samson Mideksa Legesse, James Leigh, Jacopo Lenzi, Elvynna Leong, Temesgen L Lerango, Ming-Chieh Li, Wei Li, Xiaopan Li, Zhihui Li, Massimo Libra, Virendra S Ligade, Andrew Tiyamike Makhiringa Likaka, Lee-Ling Lim, Stephen S Lim, Ro-Ting Lin, Vasileios-Arsenios Lioutas, Stefan Listl, Jue Liu, Simin Liu, Xiaofeng Liu, Katherine M Livingstone, Erand Llanaj, Chun-Han Lo, Arianna Maeve Loreche, László Lorenzovici, Mojgan Lotfi, Masoud Lotfizadeh, Rafael Lozano, Jailos Lubinda, Giancarlo Lucchetti, Stefan Ma, Zheng Feei Ma, Mahmoud Mabrok, Nikolaos Machairas, Monika Machoy, Javier A Magaña Gómez, Azzam A Maghazachi, Sandeep B Maharaj, Preeti Maharjan, Soleiman Mahjoub, Mansour Adam Mahmoud, Elham Mahmoudi, Morteza Mahmoudi, Omar Mohamed Makram, Jeadran N Malagón-Rojas, Elaheh Malakan Rad, Reza Malekzadeh, Armaan K Malhotra, Kashish Malhotra, Ahmad Azam Malik, Iram Malik, Lesibana Anthony Malinga, Deborah Carvalho Malta, Abdullah A Mamun, Yosef Manla, Fahmida Mannan, Yasaman Mansoori, Ali Mansour, Vahid Mansouri, Mohammad Ali Mansournia, Hamid Reza Marateb, Joemer C Maravilla, Agustina M Marconi, Parham Mardi, Mirko Marino, Abdoljalal Marjani, Bernardo Alfonso Martinez-Guerra, Ramon Martinez-Piedra, Francisco Rogerlândio Martins-Melo, Miquel Martorell, Wolfgang Marx, Sharmeen Maryam, Roy Rillera Marzo,

Kedar K V Mate, Clara N Matei, Alexander G Mathioudakis, Richard James Maude, Andrea Maugeri, Erin A May, Mahsa Mayeli, Mohsen Mazidi, Colm McAlinden, John J McGrath, Martin McKee, Anna Laura Wensel McKowen, Michael A McPhail, Steven M McPhail, Enkeleint A Mechili, Rishi P Mediratta, Jitendra Kumar Meena, Medhin Mehari, Rahul Mehra, Kamran Mehrabani-Zeinabad, Entezar Mehrabi Nasab, Ravi Mehrotra, Mathewos M Mekonnen, Walter Mendoza, Ritesh G Menezes, Endalkachew Worku Mengesha, Alexios-Fotios A Mentis, Sultan Ayoub Meo, Atte Meretoja, Tuomo J Meretoja, Abera M Mersha, Bezawit Afework Mesfin, Tomislav Mestrovic, Adquate Mhlanga, Laurette Mhlanga, Tianyue Mi, Georgia Micha, Irminda Maria Michalek, Ted R Miller, Sergey Nikolaevich Mindlin, Le Huu Nhat Minh, GK Mini, Neema W Minja, Niloofar Mirdamadi, Andreea Mirica, Omid Mirmosayyeb, Mizan Kiros Mirutse, Mohammad Mirza-Aghazadeh-Attari, Maryam Mirzaei, Tadesse Misgana, Sanjeev Misra, Philip B Mitchell, Prasanna Mithra, Chaitanya Mittal, Madhukar Mittal, Babak Moazen, Ahmed Ismail Mohamed, Jama Mohamed, Mouhand F H Mohamed, Nouh Saad Mohamed, Sakineh Mohammad-Alizadeh-Charandabi, Soheil Mohammadi, Abdollah Mohammadian-Hafshejani, Saeed Mohammad-pour, Marita Mohammadshahi, Mustapha Mohammed, Salahuddin Mohammed, Shafiu Mohammed, Hoda Mojiri-forushani, Ali H Mokdad, Peyman Mokhtarzadehazar, Kaveh Momenzadeh, Sara Momtazmanesh, Mohammad Ali Moni, Fateme Montazeri, AmirAli Moodi Ghalibaf, Maryam Moradi, Yousef Moradi, Maziar Moradi-Lakeh, Mehdi Moradinazar, Farhad Moradpour, Paula Moraga, Rafael Silveira Moreira, Negar Morovatdar, Reza Mosaddeghi Heris, Jonathan F Mosser, Elias Mossialos, Hakimeh Mostafavi, Amirmahdi Mostofinejad, Simin Mouodi, Seyed Ehsan Mousavi, Amin Mousavi Khaneghah, Christine Mpundu-Kaambwa, Sumaira Mubarik, Lorenzo Muccioli, Ulrich Otto Mueller, Faraz Mughal, Sumoni Mukherjee, George Duke Mukoro, Admir Mulita, Francesk Mulita, Malaisamy Muniyandi, Kavita Munjal, Christopher J L Murray, Fungai Musaigwa, Khaled M Musallam, Ghulam Mustafa, Sathish Muthu, Saravanan Muthupandian, Woojae Myung, Ashraf F Nabhan, Fredrick Muyia Nafukho, Ahamarshan Jayaraman Nagarajan, Mohsen Naghavi, Pirouz Naghavi, Ganesh R Naik, Gurudatta Naik, Mukhammad David Naimzada, Sanjeev Nair, Tapas Sadasivan Nair, Hastyar Hama Rashid Najmuldeen, Vinay Nangia, Shumaila Nargus, Bruno Ramos Nascimento, Abdallah Y Naser, Mohammad Javad Nasiri, Zuhair S Natto, Javaid Nauman, Muhammad Naveed, Biswa Prakash Nayak, Vinod C Nayak, Athare Nazri-Panjaki, Hadush Negash, Ionut Negoii, Ruxandra Irina Negoii, Seyed Aria Nejadghaderi, Chakib Nejjari, Mohammad Hadi Nematollahi, Olivia D Nesbit, Charles Richard James Newton, Josephine W Ngunjiri, Dang H Nguyen, Phat Tuan Nguyen, Phuong The Nguyen, Van Thanh Nguyen, Yeshambel T Nigatu, Taxiarchis Konstantinos Nikolouzakis, Ali Nikoobar, Amin Reza Nikpoor, Muhammad A Nizam, Shuhei Nomura, Mamoona Noreen, Nafise Noroozi, Bo Norrving, Chisom Adaobi Nri-Ezedi, George Ntaios, Mpiko Ntsekhe, Dieta Nurrika, Bogdan Oancea, Kehinde O Obamiro, Ismail A Odetokun, Akinyemi O D Ofakunrin, Ropo Ebenezer Ogunsakin, James Odhiambo Oguta, Hassan Okati-Aliabad, Sylvester Reuben Okeke, Akinkunmi Paul Okekunle, Lawrence Okidi, Osaretin Christabel Okonji, Andrew T Olagunju, Muideen Tunbosun Olaiya, Titilope O Olanipekun, Matthew Idowu Olatubi, Antonio Olivas-Martinez, Gláucia Maria Moraes Oliveira, Abdulhakeem Abayomi Olorukooba, Isaac Iyinoluwa Olufadewa, Bolajoko Olubukunola Olusanya, Jacob Olusegun Olusanya, Yinka Doris Oluwafemi, Gideon Olamilekan Oluwatunase, Hany A Omar, Goran Latif Omer, Obinna E Onwujekwe, Kenneth Ikenna Onyedibe, John Nelson Opio, Michal Ordak, E Roberto Orellana, Orish Ebere Orisakwe, Verner N Orish, Hans Orru, Doris V Ortega-Altamirano, Alberto Ortiz, Uchechukwu Levi Osuagwu, Adrian Otoiu, Nikita Otvstavnov, Amel Ouyahia, Mayowa O Owolabi, Ifeoluwa Temitayo Oyeyemi, Oyetunde T Oyeyemi, Mahesh Padukudru P A, Jagadish Rao Padubidri, Mahsa Pahlavikhah Varnosfaderani, Pramod Kumar Pal, Tamás Palicz, Raffaele Palladino, Adrian Pana, Parsa Panahi, Ashok Pandey, Seithikurippu R Pandi-Perumal, Victoria Pando-Robles, Helena Ullyartha Pangaribuan, Georgios D Panos, Paraskevi Papadopoulou, Shahina Pardhan, Romil R Parikh, Seoyeon Park, Ashwaghosha Parthasarathi, Ava Pashaei, Deepak Kumar Pasupula, Jenil R Patel, Sangram Kishor Patel, Aslam Ramjan Pathan, Ashlesh Patil, Shankargouda Patil, Dimitrios Patoulis, Venkata Suresh Patthipati, Uttam Paudel, Shrikant Pawar, Spencer A Pease, Amy E Peden, Paolo Pedersini, Veincent Christian Filipino Pepito, Emmanuel K Peprah, Gavin Pereira, Jeevan Pereira, Marcos Pereira, Mario F P Peres, Arokiasamy Perianayagam, Ionela-Roxana Petcu, Fanny Emily Petermann-Rocha, Raffaele Pezzani, Hoang Tran Pham, Michael R Phillips, Manon Pigeolet, David M Pigott, Michael A Piradov, Nishad Plakkal, Evgenii Plotnikov, Dimitri Poddighe, Peter Pollner, Ramesh Poluru, Constance Dimity Pond, Maarten J Postma, Govinda Raj Poudel, Lisasha Poudel, Ghazaleh Pournali, Sergio I Prada, Pranil Man Singh Pradhan, Vijay Kumar Prajapati, V Prakash, Chandra P Prasad, Manya Prasad, Akila Prashant, Elton Junio Sady Prates, Hery Purnobasuki, Bharathi M Purohit, Jagadeesh Puvvula, Rizwan Qaisar, Nameer Hashim Qasim, Ibrahim Qattea, Gangzhen Qian, Nguyen Khoi Quan, Amir Radfar, Venkatraman Radhakrishnan, Pourya Raee, Hadi Raecisi Shahraki, Seyedeh Niloufar Rafiei Alavi, Fakher Rahim, Md Mosfequr Rahman, Mosiur Rahman, Muhammad Aziz Rahman, Tafhimur Rahman, Amir Masoud Rahmani, Niloufar Rahnavaard, Pramila Rai, Sathish Rajaa, Ali Rajabpour-Sanati, Prashant Rajput, Prasanna Ram, Hazem Ramadan, Shakthi Kumaran Ramasamy, Sheena Ramazanu, Juwel Rana, Kritika Rana, Chhabi Lal Ranabhat, Nemanja Rancic, Smitha Rani, Shubham

Ranjan, Chythra R Rao, Indu Ramachandra Rao, Sowmya J Rao, Drona Prakash Rasali, Sina Rashedi, Vahid Rashedi, Ahmed Mustafa Rashid, Ashkan Rasouli-Saravani, Prateek Rastogi, Azad Rasul, Ramin Ravangard, Nakul Ravikumar, David Laith Rawaf, Salman Rawaf, Reza Rawassizadeh, Iman Razeghian-Jahromi, Murali Mohan Rama Krishna Reddy, Elrashdy Moustafa Mohamed Redwan, Faizan Ur Rehman, Robert C Reiner Jr, Bhageerathy Reshmi, Serge Resnikoff, Luis Felipe Reyes, Malihe Rezaee, Negar Rezaei, Nima Rezaei, Mohsen Rezaeian, Mavra A Riaz, Ana Isabel Ribeiro, Jennifer Rickard, Maria Jesus Rios-Blancas, Mónica Rodrigues, Jefferson Antonio Buendia Rodriguez, Leonardo Roeber, Peter Rohloff, Debby Syahru Romadlon, Gholamreza Roshandel, Sharareh Roshanzamir, Priyanka Roy, Enrico Rubagotti, Godfrey M Rwegerera, Chandan S N, Katharina S Sunnerhagen, Aly M A Saad, Michela Sabbatucci, Korosh Saber, Maha Mohamed Saber-Ayad, Simona Sacco, Basema Saddik, Bashdar Abuzed Sadee, Ehsan Sadeghi, Saeid Sadeghian, Umar Saeed, Maryam Saeedi, Sare Safi, Rajesh Sagar, Amene Saghazadeh, Narjes Saheb Sharif-Askari, Soumya Swaroop Sahoo, Mohammad Ali Sahraian, Seyed Aidin Sajedi, Mirza Rizwan Sajid, Joseph W Sakshaug, Payman Salamati, Afeez Abolarinwa Salami, Luciane B Salaroli, Mohamed A Saleh, Sana Salehi, Marwa Rashad Salem, Hossein Samadi Kafil, Sara Samadzadeh, Kamel A Samara, Saad Samargandy, Yoseph Leonardo Samodra, Vijaya Paul Samuel, Abdallah M Samy, Juan Sanabria, Nima Sanadgol, Edmond Sanganyado, Rama Krishna Sanjeev, Francesco Sanmarchi, Ichtiarini Nurullita Santri, Milena M Santric-Milicevic, Babak Saravi, Yaser Sarikhani, Chinmoy Sarkar, Rodrigo Sarmiento-Suárez, Gargi Sachin Sarode, Sachin C Sarode, Arash Sarveazad, Brijesh Sathian, Thirunavukkarasu Sathish, Davide Sattin, Jennifer Saulam, Susan M Sawyer, Sonia Saxena, Ganesh Kumar Saya, Yaser Sayadi, Abu Sayeed, Md Abu Sayeed, Mete Saylan, Nikolaos Scarmeas, Winfried Schlee, Art Schuermans, David C Schwebel, Falk Schwendicke, Mario Škerija, Mohammad H Semreen, Sabyasachi Senapati, Pallav Sengupta, Subramanian Senthilkumaran, Sadaf G Sepanlou, Dragos Serban, Addisu Sertsu, Yashendra Sethi, SeyedAhmad SeyedAlinaghi, Seyed Arsalan Seyedi, Amir Shafaat, Omid Shafaat, Mahan Shafie, Arman Shafiee, Nilay S Shah, Pritik A Shah, Ataollah Shahbandi, Izza Shahid, Samiah Shahid, Wajeehah Shahid, Moyad Jamal Shahwan, Masood Ali Shaikh, Alireza Shakeri, Husain Shakil, Muhammad Aaqib Shamim, Mehran Shams-Beyranvand, Hina Shamshad, Mohammad Ali Shamshirgaran, Mohammad Anas Shamsi, Mohd Shanawaz, Abhishek Shankar, Sadaf Sharfaei, Amin Sharifan, Mariam Shariff, Javad Sharifi-Rad, Saurab Sharma, Vishal Sharma, Rajesh P Shastry, Amin Shavandi, Amir Mehdi Shayan, Amr Mohamed Elsayed Shehabeldine, Aziz Sheikh, Rahim Ali Sheikhi, Jiabin Shen, Ranjitha S Shetty, Robert Adamu Shey, Amir Shiani, Kenji Shibuya, Desalegn Shiferaw, Mika Shigematsu, Jae Il Shin, Min-Jeong Shin, Rahman Shiri, Aminu Shittu, Ivy Shiue, K M Shivakumar, Sina Shool, Sunil Shrestha, Kanwar Hamza Shuja, Kerem Shuval, Migbar Mekonnen Sibhat, Emmanuel Edwar Siddig, Inga Dora Sigfusdottir, João Pedro Silva, Luís Manuel Lopes Rodrigues Silva, Soraia Silva, Jorge Piano Simões, Anjali Singal, Abhinav Singh, Aditya Singh, Ambrish Singh, Balbir Bagicha Singh, Baljinder Singh, Mahendra Singh, Mayank Singh, Narinder Pal Singh, Paramdeep Singh, Md Shahjahan Siraj, Freddy Sitas, Shravan Sivakumar, Valentin Yurievich Skryabin, Anna Aleksandrovna Skryabina, David A Sleet, Hamidreza Soleimani, Sameh S M Soliman, Marco Solmi, Yonatan Solomon, Yimeng Song, Reed J D Sorensen, Joan B Soriano, Ireneous N Soyiri, Michael Spartalis, Chandrashekhar T Sreeramareddy, Joseph R Starnes, Antonina V Starodubova, Simona Cătălina Stefan, Fridolin Steinbeis, Paschalis Steiropoulos, Stefan Stortecy, Muhammad Suleman, Rizwan Suliankatchi Abdulkader, Abida Sultana, Jing Sun, David Sunkersing, Chandan Kumar Swain, Bryan L Sykes, Lukasz Szarpak, Mindy D Szeto, Miklós Szócska, Payam Tabae Damavandi, Ozra Tabatabaei Malazy, Seyed-Amir Tabatabaeizadeh, Shima Tabatabai, Karen M Tabb, Mohammad Tabish, Luis M Taborda-Barata, Birkneh Tilahun Tadesse, Amirmasoud Taheri, Yasaman Taheri Abkenar, Moslem Taheri Soodejani, Jabeen Taiba, Iman M Talaat, Jacques Lukenze Tamuzi, Ker-Kan Tan, Haosu Tang, Hong K Tang, Razieh Tavakoli Oliace, Seyed Mohammad Tavangar, Nuno Taveira, Tsion Mulat Tebeje, Yibekal Manaye Tefera, Mohamad-Hani Temsah, Reem Mohammad Hani Temsah, Masayuki Teramoto, Solomon Hailemariam Tesfaye, Pugazhenthan Thangaraju, Kavumpurathu Raman Thankappan, Rajshree Thapa, Rekha Thapar, Nihal Thomas, Chern Choong Chern Thum, Jing Tian, Jansje Henny Vera Ticoalu, Tenaw Yimer Tiruye, Seyed Abolfazl Tohidast, Marcello Tonelli, Mathilde Touvier, Marcos Roberto Tovani-Palone, Khai Hoan Tram, Nghia Minh Tran, Domenico Trico, Indang Trihandini, Samuel Joseph Tromans, Vien T Truong, Thien Tan Tri Tai Truyen, Evangelia Eirini Tsermpini, Munkhtuya Tumurkhuu, Kang Tung, Stefanos Tyrovolas, Chukwudi S Ubah, Aniefiok John Udoakang, Arit Udoh, Inam Ulhaq, Saeed Ullah, Sana Ullah, Muhammad Umair, Chukwuma David Umeokonkwo, Anushri Umesh, Bhaskaran Unnikrishnan, Era Upadhyay, Amir Mohammad Vahdani, Sahel Valadan Tahbaz, Rohollah Valizadeh, Jef Van den Eynde, Orsolya Varga, Siddhartha Alluri Varma, Priya Vart, Shoban Babu Varthya, Lennert J Veerman, Narayanaswamy Venketasubramanian, Deneshkumar Venugopal, Nicholas Alexander Verghese, Madhur Verma, Pratibha Verma, Massimiliano Veroux, Georgios-Ioannis Verras, Dominique Vervoort, Rafael José Vieira, Jorge Hugo Villafaña, Gabriela Ines Villanueva, Paul J Villeneuve, Bay Vo, Stein Emil Vollset, Simona Ruxandra Volovat, Victor Volovici, Theo Vos, Isidora S Vujcic, Yohannes Dibaba Wado, Hatem A Wafa, Yasir Waheed, Richard G Wamai, Cong Wang, Fang Wang, Shu Wang, Song Wang, Yanzhong Wang, Yuan-Pang

Wang, Paul Ward, Stefanie Watson, Kosala Gayan Weerakoon, Daniel J Weiss, Abrha Hailay Weldemariam, Yi Feng Wen, Andrea Werdecker, Ronny Westerman, Dakshitha Praneeth Wickramasinghe, Nuwan Darshana Wickramasinghe, Tissa Wijeratne, Shadrach Wilson, Eve E Wool, Anthony D Woolf, Dongze Wu, Ratna Dwi Wulandari, Hong Xiao, Bin Xu, Xiaoyue Xu, Lalit Yadav, Yao Yao, Pengpeng Ye, Gesila Endashaw Yesera, Renjulal Yesodharan, Subah Abderehim Yesuf, Arzu Yiğit, Vahit Yiğit, Dong Keon Yon, Naohiro Yonemoto, Yuyi You, Mustafa Z Younis, Chuanhua Yu, Siddhesh Zadey, Vesna Zadnik, Nima Zafari, Mohammad Zahedi, Muhammad Nauman Zahid, Mazyar Zahir, Fathiah Zakhm, Nazar Zaki, Giulia Zamagni, Burhan Abdullah Zaman, Sojib Bin Zaman, Milad Zandi, Ghazal G Z Zandieh, Mikhail Sergeevich Zastrozhin, Mohammed G M Zeariya, Youjie Zeng, Chunxia Zhai, Chen Zhang, Haijun Zhang, Hongwei Zhang, Yunquan Zhang, Zhenyu Zhang, Hanqing Zhao, Yang Zhao, Chenwen Zhong, Juexiao Zhou, Bin Zhu, Zhaohua Zhu, Magdalena Zielińska, Zhiyong Zou, Alimuddin Zumla, Elric Zweck, and Samer H Zyoud.

### Drafting the work or revising it critically for important intellectual content

Amirali Aali, Cristiana Abbafati, Jaffar Abbas, Samar Abd ElHafeez, Michael Abdelmasseh, Sherief Abd-Elsalam, Ahmed Abdelwahab, Meriem Abdoun, Auwal Abdullahi, Ame Mehadi Abdurehman, Aidin Abedi, Armita Abedi, Tadesse M Abegaz, Roberto Ariel Abeldaño Zuñiga, Olugbenga Olusola Abiodun, Hassan Abolhassani, Mohamed Abouzid, Lucas Guimarães Abreu, Samir Abu Rumeileh, Salahdein Aburuz, Ahmed Abu-Zaid, Juan Manuel Acuna, Isaac Yeboah Addo, Oladimeji M Adebayo, Oyelola A Adegboye, Victor Adekanmbi, Abiola Victor Adepoju, Charles Oluwaseun Adetunji, Olorunsola Israel Adeyomoye, Amin Adibi, Qorinah Estiningtyas Sakilah Adnani, Saryia Adra, Aanuoluwapo Adeyimika Afolabi, Ali Afraz, Saira Afzal, Pradyumna Agasthi, Antonella Agodi, Bright Opoku Ahinkorah, Danish Ahmad, Firdos Ahmad, Muayyad M Ahmad, Ayman Ahmed, Haroon Ahmed, Luai A Ahmed, Muktar Beshir Ahmed, Syed Anees Ahmed, Marjan Ajami, Olufemi Ajumobi, Essona Matatom Akara, Karolina Akinosoglou, Ammar Al Homsí, Mohammad Al Qadire, Samer O Alalalmeh, Khurshid Alam, Rasmieh Mustafa Al-amer, Mohammed Albashtawy, Mohammad T AlBataineh, Ayman Al-Eyadhy, Fadwa Alhalaiqa Naji Alhalaiqa, Mohammed Khaled Al-Hanawi, Abid Ali, Akhtar Ali, Hassam Ali, Mohammed Usman Ali, Syed Shujait Shujait Ali, Gianfranco Alicandro, Sheikh Mohammad Alif, Ahmednur Adem Aliyi, Sadeq Ali Ali Al-Maweri, Joseph Uy Almazan, Omar Almidani, Mahmoud A Alomari, Nivaldo Alonso, Jaber S Alqahtani, Salman Khalifah Al-Sabah, Jaffar A Al-Tawfiq, Hassan Alwafi, Yaser Mohammed Al-Worafi, Hany wq, Karem H Alzoubi, Azmeraw T Amare, Abebe Feyissa Amhare, Tarek Tawfik Amin, Alireza Amindarolzari, Sohrab Amiri, Hubert Amu, Dickson A Amugsi, Jimoh Amzat, Robert Ancuceanu, Deanna Anderlini, Pedro Prata Andrade, Catalina Liliana Andrei, Tudorel Andrei, Dhanalakshmi Angappan, Abhishek Anil, Afifa Anjum, Catherine M Antony, Ernoiz Antriyandarti, Iyadunni Adesola Anuoluwa, Anayochukwu Edward Anyasodor, Seth Christopher Yaw Appiah, Muhammad Aqeel, Jalal Arabloo, Razman Arabzadeh Bahri, Morteza Arab-Zozani, Ana Margarida Araújo, Abdulfatai Aremu, Hany Ariffin, Timur Aripov, Benedetta Armocida, Mahwish Arooj, Kurnia Dwi Artanti, Judie Arulappan, Idowu Thomas Aruleba, Raphael Taiwo Aruleba, Ashokan Arumugam, Malke Asaad, Saeed Asgary, Muhammad Ashraf, Marvellous O Asika, Seyyed Shamsadin Athari, Maha Moh'd Wahbi Atout, Alok Atreya, Avinash Aujayeb, Abolfazl Avan, Beatriz Paulina Ayala Quintanilla, Martin Amogre Ayanore, Getnet Melaku Ayele, Seyed Mohammad Ayyoubzadeh, Sina Azadnajafabad, Ahmed Y Azzam, Abraham Samuel Babu, Muhammad Badar, Alaa Badawi, Ashish D Badiye, Soroush Baghdadi, Sara Bagherieh, Sulaiman Bah, Jianjun Bai, Abdulaziz T Bako, Senthilkumar Balakrishnan, Saliu A Balogun, Ovidiu Constantin Baltatu, Kiran Bam, Maciej Banach, Soham Bandyopadhyay, Hansi Bansal, Martina Barchitta, Mainak Bardhan, Suzanne Lyn Barker-Collo, Francesco Barone-Adesi, Hiba Jawdat Barqawi, Ronald D Barr, Lope H Barrero, Asma'u I J Bashir, Hameed Akande Bashiru, Pritish Baskaran, Buddha Basnyat, Quique Bassat, João Diogo Basso, Bernhard T Baune, Thomas Beaney, Neeraj Bedi, Emad Behboudi, Amir Hossein Behnoush, Maryam Beiranvand, Diana Fernanda Bejarano Ramirez, Uzma Iqbal Belgaumi, Michelle L Bell, Aminu K Bello, Muhammad Bashir Bello, Olorunjuwon Omolaja Bello, Luis Belo, Apostolos Beloukas, Derrick A Bennett, Isabela M Bensenor, Habib Benzian, Zombor Berezvai, Paulo J G Bettencourt, Habtamu B Beyene, Kebede A Beyene, Akshaya Srikanth Bhagavathula, Neeraj Bhala, Dinesh Bhandari, Prarthna V Bhardwaj, Ashish Bhargava, Sonu Bhaskar, Vivek Bhat, Gurjit Kaur Bhatti, Javinder Singh Bhatti, Manpreet S Bhatti, Rajbir Bhatti, Boris Bikbov, Nada Binmadi, Antonio Biondi, Catherine Bisignano, Francesca Bisulli, Atanu Biswas, Saeid Bitaraf, Tone Bjørge, Archie Bleyer, Mary Sefa Boampong, Virginia Bodolica, Adam Olalekan Bodunrin, Milad Bonakdar Hashemi, Aime Bonny, Kaustubh Bora, Safiya Bala Borodo, Rohan Borschmann, Alejandro Botero Carvajal, Souad Bouaoud, Sofiane Boudalia, Edward J Boyko, Nicola Luigi Bragazzi, Dejana Braithwaite, Hermann Brenner, Norma B Bulamu, Danilo Buonsenso, Richard A Burns, Sharath Burugina Nagaraja, Reinhard Busse, Yasser Bustanji, Florentino Luciano Caetano dos Santos, Luis Alberto Cámera, Luciana Aparecida Campos, Ismael R Campos-Nonato, Chao Cao, Sinclair Carr, Giulia Carreras, Juan J Carrero,

Andrea Carugno, Felix Carvalho, Márcia Carvalho, Joao Mauricio Castaldelli-Maia, Carlos A Castañeda-Orjuela, Giulio Castelpetra, Ferrán Catalá-López, Alberico L Catapano, Maria Sofia Cattaruzza, Arthur Caye, Christopher R Cederroth, Francieli Cembranel, Muthia Cenderadewi, Ester Cerin, Muge Cevik, Pamela R Uscamaita Chacón-Uscamaita, Yaacoub Chahine, Chiranjib Chakraborty, Jeffrey Shi Kai Chan, Chin-Kuo Chang, Vijay Kumar Chattu, Victoria Chatzimavridou-Grigoriadou, Malizgani Paul Chavula, Huzaifa Ahmad Cheema, An-Tian Chen, Haowei Chen, Lingxiao Chen, Meng Xuan Chen, Simiao Chen, Nicolas Cherbuin, Gerald Chi, Jesus Lorenzo Chirinos-Caceres, So Mi Jemma Cho, William C S Cho, Bryan Chong, Hitesh Chopra, Rahul Choudhary, Rajiv Chowdhury, Dinh-Toi Chu, Eric Chung, Eunice Chung, Karly I Cini, Cain C T Clark, Alyssa Columbus, Haley Comfort, Joao Conde, Sara Conti, Paolo Angelo Cortesi, Vera Marisa Costa, Ewerton Cousin, Richard G Cowden, Michael H Criqui, Natália Cruz-Martins, Patricia Cullen, Daniel da Silva e Silva, Sriharsha Dadana, Zhaoli Dai, Koustuv Dalal, Giovanni Damiani, Emanuele D'Amico, Sara Daneshvar, Nihar Ranjan Dash, Claudio Alberto Dávila-Cervantes, Nicole Davis Weaver, Diego De Leo, Aklilu Tamire Debele, Louisa Degenhardt, Ivan Delgado-Enciso, Laura Delgado-Ortiz, Berecha Hundessa Demessa, Andreas K Demetriades, Edgar Denova-Gutiérrez, Kebede Deribe, Nikolaos Dervenis, Don C Des Jarlais, Hardik Dineshbhai Desai, Rupak Desai, Keshab Deuba, Sourav Dey, Mandira Lamichhane Dhimal, Meghnath Dhimal, Sameer Dhingra, Diana Dias da Silva, Daniel Diaz, Adriana Dima, Delaney D Ding, M Ashworth Dirac, Abhinav Dixit, Shilpi Gupta Dixit, Thanh Chi Do, Camila Bruneli do Prado, Masoud Dodangeh, Christiane Dolecek, E Ray Dorsey, Wendel Mombaque dos Santos, Rajkumar Doshi, Leila Doshmangir, Abdel Douiri, Robert Kokou Dowou, Tim Robert Driscoll, Haneil Larson Dsouza, John Dube, Samuel C Dumith, Bruce B Duncan, Oyewole Christopher Durojaiye, Sulagna Dutta, Arkadiusz Marian Dzedzic, Chidiebere Peter Echieh, David Edvardsson, Defi Efendi, Shayan Eghdami, Ebrahim Eini, Michael Ekholuenetale, Rabie Adel El Arab, Maysaa El Sayed Zaki, Maha El Tantawi, Iffat Elbarazi, Noha Mousaad Elemam, Frank J Elgar, Islam Y Elgendy, Ghada Metwally Tawfik ElGohary, Hala Rashad Elhabashy, Muhammed Elhadi, Omar Abdelsadek Abdou Elmeligy, Ibrahim Elsohaby, Mehdi Emamverdi, Theophilus I Emeto, Luchuo Engelbert Bain, Ryenchindorj Erkhembayar, Tesfahun C Eshetie, Sharareh Eskandarieh, Juan Espinosa-Montero, Farshid Etaee, Ugochukwu Anthony Eze, Natalia Fabin, Adeniyi Francis Fagbamigbe, Saman Fahimi, Luca Falzone, Mohsen Farjoud Kouhanjani, Andre Faro, Ali Fatehizadeh, Nelsensius Klau Fauk, Valery L Feigin, Seyed-Mohammad Fereshtehnejad, Abdullah Hamid Feroze, Pietro Ferrara, Nuno Ferreira, Getahun Fetensa, Irina Filip, Florian Fischer, Joanne Flavel, Bobirca Teodor Florin, Morenike Oluwatoyin Folayan, Kristen Marie Foley, Behzad Foroutan, Matteo Foschi, Kate Louise Francis, Richard Charles Franklin, Alberto Freitas, Joseph Friedman, Sara D Friedman, Takeshi Fukumoto, Peter Andras Gaal, Muktar A Gadanya, Santosh Gaihre, Yaseen Galali, Nasrin Galehdar, Silvano Gallus, Aravind P Gandhi, Balasankar Ganesan, Jalaj Garg, Prem Gautam, Rupesh K Gautam, Federica Gazzelloni, Miglas W Gebregergis, Mesfin Gebrehiwot, Urge Gerema, Motuma Erena Getachew, Tamirat Getachew, Mansour Ghafourifard, Sulmaz Ghahramani, Khalid Yaser Ghailan, Alireza Ghajar, MohammadReza Ghasemi, Fariba Ghassemi, Ramy Mohamed Ghazy, Sailaja Ghimire, Ghozali Ghozali, Sherief Ghozy, Alessandro Gialluisi, Ruth Margaret Gibson, Tiffany K Gill, Richard F Gillum, Themba G Ginindza, Alem Girmay, James C Glasbey, Elena V Gnedovskaya, Laszlo Göbölös, Arefeh Golestanfar, Davide Golinelli, Philimon N Gona, Anmol Goyal, Scott Greenhalgh, Michal Grivna, Giovanni Guarducci, Mesay Dechasa Gudeta, Avirup Guha, Stefano Guicciardi, Sasidhar Gunturu, Cui Guo, Bhawna Gupta, Rajat Das Gupta, Sapna Gupta, Veer Bala Gupta, Vivek Kumar Gupta, Reyna Alma Gutiérrez, Farrokh Habibzadeh, Parham Habibzadeh, Vladimir Hachinski, Mohammad Haddadi, Nils Haep, Adel Hajj Ali, Esam S Halboub, Sobia Ahsan Halim, Brian J Hall, Rabih Halwani, Randah R Hamadeh, Mohammad Hamiduzzaman, Ahmad Hammoud, Nasrin Hanifi, Graeme J Hankey, Md Abdul Hannan, Harapan Harapan, Josep Maria Haro, Ahmed I Hasaballah, Faizul Hasan, M Tasdik Hasan, Hamidreza Hasani, Abbas M Hassan, Amr Hassan, Johannes Haubold, Rasmus J Havmoeller, Simon I Hay, Youssef Hbid, Jeffrey J Hebert, Omar E Hegazi, Golnaz Heidari, Reza Heidari-Soureshjani, Bartosz Helfer, Claudiu Herteliu, Hamed Hesami, Dineshani Hettiarachchi, Demisu Zenbaba Heyi, Kamal Hezam, Yuta Hiraike, Howard J Hoffman, Ramesh Holla, Nobuyuki Horita, Md Mahbub Hossain, Sahadat Hossain, Mohammad-Salar Hosseini, Sorin Hostiuc, Vivian Chia-rong Hsieh, Junjie Huang, Md Nazmul Huda, Fernando N Hugo, Michael Hultström, Javid Hussain, Salman Hussain, Hong-Han Huynh, Segun Emmanuel Ibitoye, Oluwatope Olaniyi Idowu, Desta Ijo, Mehran Ilaghi, Olayinka Stephen Ilesanmi, Irena M Ilic, Milena D Ilic, Mustapha Immurana, LEEBERK Raja Inbaraj, Farideh Iravanpour, Kenneth Chukwuemeka Iregbu, Md Rabiul Islam, Mohammad Mainul Islam, Sheikh Mohammed Shariful Islam, Farhad Islami, Nahlah Elkudssiah Ismail, Gaetano Isola, Chidozie C D Iwu, Chinwe Juliana Iwu-Jaja, Mahalaxmi Iyer, Linda Merin J, Louis Jacob, Kathryn H Jacobsen, Morteza Jafarinia, Khushleen Jaggi, Kasra Jahankhani, Nader Jahanmehr, Haitham Jahrami, Akhil Jain, Mihajlo Jakovljevic, Reza Jalilzadeh Yengejeh, Chinmay T Jani, Mark M Janko, Abubakar Ibrahim Jatau, Sathish Kumar Jayapal, Shubha Jayaram, Alelign Tasew Jema, Digisie Mequanint Jemere, Wonjeong Jeong, Ravi Prakash Jha, Nabi Jomehzadeh, Darwin Phan Jones, Tamas Joo, Abel Joseph, Nitin Joseph, Charity Ehimwenma Joshua, Jacek Jerzy Jozwiak, Mikk Jürisson, Ali Kabir,

Hannaneh Kabir, Vidya Kadashetti, Farima Kahe, Rizwan Kalani, Feroze Kaliyadan, Sanjay Kalra, Arun Kamireddy, Thanigaivelan Kanagasabai, Himal Kandel, Edmund Wedam Kanmiki, Kehinde Kazeem Kanmodi, Rami S Kantar, Neeti Kapoor, Mehrdad Karajizadeh, Shama D Karanth, Asima Karim, Hanie Karimi, Faizan Zaffar Kashoo, Hengameh Kasraei, Nigussie Assefa Kassaw, Nicholas J Kassebaum, Adarsh Katamreddy, Srinivasa Vittal Katikireddi, Patrick DMC Katoto, Joonas H Kauppila, Navjot Kaur, Jeanne Françoise Kayibanda, Gbenga A Kayode, Foad Kazemi, Sina Kazemian, sara Kazeminia, John H Kempen, Jessica A Kerr, Emmanuelle Kesse-Guyot, Mohamad Mehdi Khadembashiri, Himanshu Khajuria, Mohammad Khalafi, Amirmohammad Khalaji, Nauman Khalid, Gulfaraz Khan, Ikramullah Khan, Maseer Khan, Moien AB Khan, Taimoor Khan, Mahammed Ziauddin Khan suheb, Shaghayegh Khanmohammadi, Khaled Khatab, Armin Khavandegar, Hamid Reza Khayat Kashani, khalid a kheirallah, Feriha Fatima Khidri, Elaheh Khodadoust, Mahmood Khosrowjerdi, Jagdish Khubchandani, Grace Kim, Adnan Kisa, Sezer Kisa, Mika Kivimäki, Ann Kristin Skrindo Knudsen, Farzad Kompani, Ashwin Laxmikant Kotnis, Parvaiz A Koul, Sindhura Lakshmi Koulmane Laxminarayana, Ai Koyanagi, Michael A Kravchenko, Kewal Krishan, Hare Krishna, Kris J Krohn, Barthelemy Kuate Defo, Connor M Kubeisy, Md Abdul Kuddus, Mohammed Kuddus, Ilari Kuitunen, Mukhtar Kulimbet, Vishnutheertha Kulkarni, Harish Kumar, Madhulata Kumari, Om P Kurmi, Asep Kusnali, Dian Kusuma, Tezer Kutluk, Evans F Kyei, Carlo La Vecchia, Muhammad Awwal Ladan, Lucie Laflamme, Chandrakant Lahariya, Abdelilah Lahmar, Ratilal Laloo, Tea Lallukka, Berthold Languth, Van Charles Lansingh, Ariane Laplante-Lévesque, Anders O Larsson, Savita Lasrado, Kamaluddin Latief, Mahrukh Latif, Kaveh Latifinaibin, Nhi Huu Hanh Le, Thao Thi Thu Le, Paul H Lee, Samson Mideksa Legesse, Jacopo Lenzi, Elvynna Leong, Temesgen L Lerango, Wei Li, Zhihui Li, Massimo Libra, Andrew Tiyamike Makhiringa Likaka, Lee-Ling Lim, Stefan Listl, Jue Liu, Katherine M Livingstone, Erand Llanaj, Chun-Han Lo, László Lorenzovici, Giancarlo Lucchetti, Alessandra Lugo, Raimundas Lunevicius, Zheng Feei Ma, Mahmoud Mabrok, Nikolaos Machairas, Monika Machoy, Christian Madsen, Javier A Magaña Gómez, Preeti Maharjan, Soleiman Mahjoub, Mansour Adam Mahmoud, Elham Mahmoudi, Omar Mohamed Makram, Elaheh Malakan Rad, Reza Malekzadeh, Armaan K Malhotra, Kashish Malhotra, Ahmad Azam Malik, Deborah Carvalho Malta, Abdullah A Mamun, Fahmida Mannan, Yasaman Mansoori, Vahid Mansouri, Lorenzo Giovanni Mantovani, Bishnu P Marasini, Hamid Reza Marateb, Parham Mardi, Bernardo Alfonso Martinez-Guerra, Ramon Martinez-Piedra, Cleodice A Martins, Francisco Rogerlândio Martins-Melo, Miquel Martorell, Wolfgang Marx, Sharmeen Maryam, Roy Rillera Marzo, Clara N Matei, Alexander G Mathioudakis, Andrea Maugeri, Erin A May, Mahsa Mayeli, Mohsen Mazidi, Antonio Mazzotti, Colm McAlinden, John J McGrath, Anna Laura Wensel McKowen, Susan A McLaughlin, Steven M McPhail, Enkeleint A Mechili, Rishi P Mediratta, Jitendra Kumar Meena, Max L Mehlman, Entezar Mehrabi Nasab, Mathewos M Mekonnen, Walter Mendoza, Ritesh G Menezes, George A Mensah, Laverne G Mensah, Alexios-Fotios A Mentis, Sultan Ayoub Meo, Atte Meretoja, Tuomo J Meretoja, Tomislav Mestrovic, Georgia Micha, Irmina Maria Michalek, Ted R Miller, Sergey Nikolaevich Mindlin, Giada Minelli, Le Huu Nhat Minh, GK Mini, Neema W Minja, Mojgan Mirghafourvand, Andreea Mirica, Omid Mirmosayyeb, Philip B Mitchell, Prasanna Mithra, Chaitanya Mittal, Madhukar Mittal, Babak Moazen, Mouhand F H Mohamed, Nouh Saad Mohamed, Sakineh Mohammad-Alizadeh-Charandabi, Soheil Mohammadi, Mustapha Mohammed, Salahuddin Mohammed, Shafiu Mohammed, Ali H Mokdad, Kaveh Momenzadeh, Sara Momtazmanesh, Lorenzo Monasta, Mohammad Ali Moni, Fateme Montazeri, AmirAli Moodi Ghalibaf, Maryam Moradi, Yousef Moradi, Maziar Moradi-Lakeh, Paula Moraga, Lidia Morawska, Rafael Silveira Moreira, Shane Douglas Morrison, Jakob Morze, Reza Mosaddeghi Heris, Jonathan F Mosser, Amirmahdi Mostofinejad, Simin Mouodi, Parsa Mousavi, Amin Mousavi Khaneghah, Matias Mrejen, Faraz Mughal, George Duke Mukoro, Malaisamy Muniyandi, Christopher J L Murray, Fungai Musaigwa, Khaled M Musallam, Ghulam Mustafa, Sathish Muthu, Ashraf F Nabhan, Ahamarshan Jayaraman Nagarajan, Mohsen Naghavi, Mukhammad David Naimzada, Sanjeev Nair, Hastyar Hama Rashid Najmuldeen, Shumaila Nargus, Bruno Ramos Nascimento, Gustavo G Nascimento, Abdallah Y Naser, Zuhair S Natto, Javaid Nauman, Biswa Prakash Nayak, Vinod C Nayak, Ashish Kumar Nayyar, Hadush Negash, Ionut Negoii, Ruxandra Irina Negoii, Serban Mircea Negru, Seyed Aria Nejadghaderi, Samata Nepal, Charles Richard James Newton, Josephine W Ngunjiri, Dang H Nguyen, Phat Tuan Nguyen, Phuong The Nguyen, Tuan Thanh Nguyen, Van Thanh Nguyen, Taxiarchis Konstantinos Nikolouzakis, Amin Reza Nikpoor, Muhammad A Nizam, Mamoona Noreen, Abbas Norouzian Baghani, Bo Norrving, Jean Jacques Noubiap, Chisom Adaobi Nri-Ezedi, George Ntaios, Mpiko Ntsekhe, Virginia Nuñez-Samudio, Dieta Nurrika, Bogdan Oancea, Kehinde O Obamiro, Ismail A Odetokun, Akinyemi O D Ofakunrin, In-Hwan Oh, Sylvester Reuben Okeke, Osaretin Christabel Okonji, Patrick Godwin Okwute, Andrew T Olagunju, Titilope O Olanipekun, Matthew Idowu Olatubi, Antonio Olivas-Martinez, Gláucia Maria Moraes Oliveira, Susan Oliver, Abdulhakeem Abayomi Olorukooba, Bolajoko Olubukunola Olusanya, Jacob Olusegun Olusanya, Hany A Omar, Obinna E Onwujekwe, Kenneth Ikenna Onyedibe, Michal Ordak, Verner N Orish, Hans Orru, Doris V Ortega-Altamirano, Alberto Ortiz, Edgar Ortiz-Brizuela, Esteban Ortiz-Prado, Uchechukwu Levi Osuagwu, Adrian Otoiu,

Nikita Otstavnov, Guoqing Ouyang, Mayowa O Owolabi, Oyetunde T Oyeyemi, Yaz Ozten, Mahesh Padukudru P A, Jagadish Rao Padubidri, Mahsa Pahlavikhah Varnosfaderani, Tamás Palicz, Claudia Palladino, Raul Felipe Palma-Alvarez, Seithikurippu R Pandi-Perumal, Ioannis Pantazopoulos, Paraskevi Papadopoulou, Shahina Pardhan, Romil R Parikh, Seoyeon Park, Ashwaghosha Parthasarathi, Ava Pashaei, Jenil R Patel, Ashlesh Patil, Shankargouda Patil, Dimitrios Patoulas, Venkata Suresh Patthipati, Uttam Paudel, Shrikant Pawar, Hamidreza Pazoki Toroudi, Spencer A Pease, Amy E Peden, Paolo Pedersini, Minjin Peng, Umberto Pensato, Veincent Christian Filipino Pepito, Gavin Pereira, Jeevan Pereira, Marcos Pereira, Mario F P Peres, Arokiasamy Perianayagam, Norberto Perico, Ionela-Roxana Petcu, Fanny Emily Petermann-Rocha, Hoang Tran Pham, Daniela Pierannunzio, Thomas Pilgrim, Marina Pinheiro, Michael A Piradov, Nishad Plakkal, Dimitri Poddighe, Peter Pollner, Maarten J Postma, Govinda Raj Poudel, Lisasha Poudel, Ghazaleh Pourali, Naeimeh Pourtaheri, Sergio I Prada, Pranil Man Singh Pradhan, Vijay Kumar Prajapati, Chandra P Prasad, Manya Prasad, Akila Prashant, Elton Junio Sady Prates, Rizwan Qaisar, Nameer Hashim Qasim, Ibrahim Qattee, Nguyen Khoi Quan, Amir Radfar, Venkatraman Radhakrishnan, Hadi Raeisi Shahraki, Seyedeh Niloufar Rafiei Alavi, Ibrar Rafique, Alberto Raggi, Fakher Rahim, Shayan Rahmani, Niloufar Rahnavaard, Pramila Rai, Sathish Rajaa, Ali Rajabpour-Sanati, Prashant Rajput, Prasanna Ram, Hazem Ramadan, Shakthi Kumaran Ramasamy, Sheena Ramazan, Kritika Rana, Chhabi Lal Ranabhat, Nemanja Rancic, Smitha Rani, Shubham Ranjan, Chythra R Rao, Mithun Rao, Sowmya J Rao, Davide Rasella, Wahid Rashedi, Ahmed Mustafa Rashid, Ashkan Rasouli-Saravani, Ramin Ravangard, David Laith Rawaf, Salman Rawaf, Iman Razeghian-Jahromi, Elrashdy Moustafa Mohamed Redwan, Faizan Ur Rehman, Giuseppe Remuzzi, Bhageerathy Reshmi, Serge Resnikoff, Luis Felipe Reyes, Malihe Rezaee, Nima Rezaei, Mavra A Riaz, Ana Isabel Ribeiro, Daniel Cury Ribeiro, Jennifer Rickard, Mónica Rodrigues, Jefferson Antonio Buendia Rodriguez, Leonardo Roeber, Ravi Rohilla, Peter Rohloff, Debby Syahru Romadlon, Luca Ronfani, Gholamreza Roshandel, Morteza Rostamian, Bedanta Roy, Enrico Rubagotti, Susan Fred Rumisha, Godfrey M Rwegerera, Andrzej Rynkiewicz, Manjula S, Chandan S N, Katharina S Sunnerhagen, Aly M A Saad, Korosh Saber, Maha Mohamed Saber-Ayad, Simona Sacco, Basema Saddik, Bashdar Abuzed Sadee, Ehsan Sadeghi, Masoumeh Sadeghi, Umar Saeed, Maryam Saeedi, Rajesh Sagar, Soumya Swaroop Sahoo, Mohammad Ali Sahraian, Seyed Aidin Sajedi, Mirza Rizwan Sajid, Joseph W Sakshaug, Saina Salahi, Sarvenaz Salahi, Afeez Abolarinwa Salami, Marwa Rashad Salem, Mohammed Z Y Salem, Sohrab Salimi, Hossein Samadi Kafil, Sara Samadzadeh, Kamel A Samara, Saad Samargandy, Vijaya Paul Samuel, Abdallah M Samy, Juan Sanabria, Edmond Sanganyado, Rama Krishna Sanjeev, Francesco Sanmarchi, Milena M Santric-Milicevic, Made Ary Sarasmita, Aswini Saravanan, Babak Saravi, Yaser Sarikhani, Chinmoy Sarkar, Rodrigo Sarmiento-Suárez, Gargi Sachin Sarode, Sachin C Sarode, Thirunavukkarasu Sathish, Susan M Sawyer, Sonia Saxena, Ganesh Kumar Saya, Yaser Sayadi, Abu Sayeed, Md Abu Sayeed, Mete Saylan, Nikolaos Scarneas, Benedikt Michael Schaarschmidt, Maria Inês Schmidt, Art Schuermans, Austin E Schumacher, David C Schwebel, Falk Schwendicke, Mario Šekerija, Siddharthan Selvaraj, Mohammad H Semreen, Sabyasachi Senapati, Pallav Sengupta, Sadaf G Sepanlou, Dragos Serban, Addisu Sertsu, Yashendra Sethi, Amir Shafaat, Mahan Shafie, Arman Shafiee, Nilay S Shah, Saeed Shahabi, Izza Shahid, Samiah Shahid, Moyad Jamal Shahwan, Alireza Shakeri, Husain Shakil, Muhammad Aaqib Shamim, Mehran Shams-Beyranvand, Hina Shamshad, Mohammad Ali Shamshirgaran, Mohammad Anas Shamsi, Mohd Shanawaz, Abhishek Shankar, Amin Sharifan, Javad Sharifi-Rad, Manoj Sharma, Saurab Sharma, Rajesh P Shastry, David H Shaw, Amr Mohamed Elsayed Shehabeldine, Manjunath Mala Shenoy, Kenji Shibuya, Mika Shigematsu, Reza Shirkoohi, Aminu Shittu, K M Shivakumar, Velizar Shivarov, Sina Shool, Sunil Shrestha, Kerem Shuval, Yafei Si, Emmanuel Edwar Siddig, João Pedro Silva, Soraia Silva, Jorge Piano Simões, Colin R Simpson, Anjali Singal, Abhinav Singh, Aditya Singh, Mahendra Singh, Narinder Pal Singh, Paramdeep Singh, Surjit Singh, Shrawan Sivakumar, Valentin Yurievich Skryabin, Anna Aleksandrovna Skryabina, Hanye Sohrabi, Hamidreza Soleimani, Marco Solmi, Yonatan Solomon, Joan B Soriano, Ireneous N Soyiri, Michael Spartalis, Chandrashekhar T Sreeramareddy, Joseph R Starnes, Vladimir I Starodubov, Antonina V Starodubova, Simona Cătălina Stefan, Dan J Stein, Fridolin Steinbeis, Leo Stockfelt, Mark A Stokes, Stefan Stortecy, Saverio Stranges, Konstantinos Stroupoulis, Muhammad Suleman, Abida Sultana, David Sunkersing, Sri Susanty, Chandan Kumar Swain, Bryan L Sykes, Lukasz Szarpak, Miklós Szócska, Payam Tabae Damavandi, Seyed-Amir Tabatabaeizadeh, Karen M Tabb, Mohammad Tabish, Takahiro Tabuchi, Amirmasoud Taheri, Yasaman Taheri Abkenar, Ardeshir Tajbaksh, Iman M Talaat, Ashis Talukder, Jacques Lukenze Tamuzi, Ker-Kan Tan, Nathan Y Tat, Vivian Y Tat, Razieh Tavakoli Oliaee, Seyed Mohammad Tavangar, Nuno Taveira, Yibekal Manaye Tefera, Mojtaba Teimoori, Mohamad-Hani Temsah, Reem Mohamad Hani Temsah, Masayuki Teramoto, Solomon Hailemariam Tesfaye, Pugazhenthan Thangaraju, Nihal Thomas, Amanda G Thrift, Chern Choong Chern Thum, Jing Tian, Ales Tichopad, Tenaw Yimer Tiruye, Seyed Abolfazl Tohidast, Marcello Tonelli, Mathilde Touvier, Marcos Roberto Tovani-Palone, Nghia Minh Tran, Domenico Trico, Samuel Joseph Tromans, Vien T Truong, Thien Tan Tri Tai Truyen, Evangelia Eirini Tsermpini, Stefanos Tyrovolas, Chukwudi S Ubah, Aniefiok John Udoakang, Arit Udoh, Inam

Ulhaq, Muhammad Umair, Tungki Pratama Umar, Chukwuma David Umeokonkwo, Brigid Unim, Bhaskaran Unnikrishnan, Era Upadhyay, Daniele Urso, Marco Vacante, Amir Mohammad Vahdani, Asokan Govindaraj Vaithinathan, Sahel Valadan Tahbaz, Jef Van den Eynde, Elena Varavikova, Orsolya Varga, Siddhartha Alluri Varma, Priya Vart, Shoban Babu Varthya, Tommi Juhani Vasankari, Narayanaswamy Venketasubramanian, Nicholas Alexander Verghese, Madhur Verma, Georgios-Ioannis Verras, Dominique Vervoort, Rafael José Vieira, Jorge Hugo Villafaña, Leonardo Villani, Gabriela Ines Villanueva, Francesco S Violante, Rachel Visontay, Vasily Vlassov, Stein Emil Vollset, Simona Ruxandra Volovat, Victor Volovici, Isidora S Vujcic, Rade Vukovic, Yasir Waheed, Cong Wang, Denny Wang, Shu Wang, Yanzhong Wang, Yuan-Pang Wang, Paul Ward, Stefanie Watson, Marcia R Weaver, Andrea Werdecker, Ronny Westerman, Dakshitha Praneeth Wickramasinghe, Nuwan Darshana Wickramasinghe, Marcin W Wojewodzic, Dongze Wu, Lalit Yadav, Sajad Yaghoubi, Lin Yang, Yao Yao, Gesila Endashaw Yesera, Subah Abderehim Yesuf, Arzu Yiğit, Vahit Yiğit, Dong Keon Yon, Naohiro Yonemoto, Siddhesh Zadey, Vesna Zadnik, Nima Zafari, Mohammad Zahedi, Mazyar Zahir, Josefina Zakzuk, Giulia Zamagni, Burhan Abdullah Zaman, Sojib Bin Zaman, Nelson Zamora, Ramin Zand, Ghazal G Z Zandieh, Aurora Zanghi, Iman Zare, Mikhail Sergeevich Zastrozhin, Mohammed G M Zeariya, Youjie Zeng, Chunxia Zhai, Chen Zhang, Haijun Zhang, Zhaofeng Zhang, Yang Zhao, Yong Zhao, Chenwen Zhong, Zhaohua Zhu, Pardis Ziaeefer, Magdalena Zielińska, Zhiyong Zou, Alimuddin Zumla, and Samer H Zyoud.

### Managing the estimation or publications process

Catherine M Antony, Catherine Bisignano, Haley Comfort, Kara Estep, Simon I Hay, Nicholas J Kassebaum, Molly B Kassel, Kasey E Kinzel, Anna Laura W McKowen, Ali H Mokdad, Christopher J L Murray, Mohsen Naghavi, Amanda Novotney, David M Pigott, Nicholas Alexander Verghese, Stein Emil Vollset, Katherine M Wells, and Eve E Wool.
